# Supplementary material for: Cholecystokinin modulates age-dependent thalamocortical neuroplasticity
Source: eLife journal article supplement (doi:10.7554/elife.101513), 2024-10-14
Supplement: data1 [file Aged mice CCKACSF_2023_v2.xlsx]

## Sheet: CCK4
	211011-1	211011-4	211020-1	211020-2	211021-2-1	211021-2-2	211021-2-3	211021-2-4	211026-1-1	211026-1-2	211026-1-3	211026-1-4	211026-2-1	211026-2-2	211026-2-3	211026-2-4	220118-2-3	220126-1-3	220127-1-1	220127-1-2	220127-1-3	220127-1-4	220127-2-1	220127-2-2	220127-2-3	220127-2-4	6.01533e-07	4.78962e-07	7.59831e-07	7.95359e-07	1.46043e-06	1.13445e-06	1.77137e-06	1.33046e-06	0.000153286	2.22999e-06	2.40331e-06	0.000112682	2.03859e-06	1.76362e-06	1.67535e-06	2.60458e-06	7.65317e-07
	6.06255e-07	4.5721e-07	7.5901e-07	8.52549e-07	1.37155e-06	1.04912e-06	1.65155e-06	1.32212e-06	0.000155613	2.31282e-06	2.41643e-06	0.000112092	2.43864e-06	1.86992e-06	1.65972e-06	3.01006e-06	8.16304e-07	0.000288923	9.58375e-07	1.46976e-06	8.97443e-07	1.46542e-06	1.66455e-06	2.24631e-06	1.45597e-06	2.36167e-06	1.00785	0.954585	0.998919	1.07191	0.939139	0.924777	0.932357	0.993732	1.01519				1.19624	1.06028	0.990672	1.15568
	5.94031e-07	4.49716e-07	8.12022e-07	7.98093e-07	1.33826e-06	1.0279e-06	1.8008e-06	1.18985e-06	0.000135849	2.01435e-06	2.20109e-06	9.83507e-05	2.10967e-06	1.76544e-06	1.60416e-06	2.59857e-06	7.97307e-07	0.000297467	8.96381e-07	1.28415e-06	8.50335e-07	1.41618e-06	1.38632e-06	2.03147e-06	1.57535e-06	2.11036e-06	0.987528	0.938938	1.06869	1.00344	0.916343	0.906075	1.01661	0.894314	0.886247				1.03487	1.00103	0.95751	0.997694
	6.21367e-07	4.52856e-07	7.864e-07	7.90053e-07	1.4728e-06	1.12236e-06	1.66488e-06	1.26854e-06	0.000152129	2.12577e-06	2.24903e-06	0.00011152	1.90367e-06	1.86579e-06	1.74855e-06	2.40838e-06	6.66563e-07	0.000298661	9.8128e-07	1.48055e-06	9.24985e-07	1.47991e-06	1.61985e-06	2.01439e-06	1.58706e-06	2.33994e-06	1.03297	0.945493	1.03497	0.993328	1.00847	0.989342	0.939886	0.953458	0.992452				0.933817	1.05793	1.0437	0.924672
	5.60347e-07	4.68564e-07	7.33922e-07	8.12281e-07	1.47334e-06	1.02992e-06	1.7239e-06	1.30466e-06	0.000125365	2.02095e-06	2.10021e-06	9.09117e-05	2.12758e-06	1.77333e-06	1.60013e-06	2.73104e-06	8.34156e-07	0.000302233	8.45971e-07	1.40319e-06	8.06346e-07	1.48373e-06	1.64928e-06	2.3027e-06	1.38422e-06	2.29264e-06	0.931531	0.978291	0.965902	1.02128	1.00884	0.907854	0.973201	0.98061	0.817852				1.04365	1.00551	0.955105	1.04855
	6.07131e-07	5.20886e-07	7.64194e-07	7.46848e-07	1.53554e-06	1.23392e-06	1.93169e-06	1.43136e-06	0.000138883	2.24027e-06	2.29388e-06	0.000103853	1.96335e-06	1.75908e-06	1.78157e-06	2.48658e-06	7.85078e-07	0.000297105	9.52825e-07	1.4211e-06	8.56468e-07	1.40895e-06	1.5794e-06	2.34014e-06	1.50588e-06	2.37413e-06	1.00931	1.08753	1.00574	0.939007	1.05143	1.08768	1.09051	1.07583	0.906038				0.963093	0.997428	1.0634	0.954696
	6.04796e-07	5.16473e-07	7.23521e-07	8.25472e-07	1.41995e-06	1.2105e-06	1.82132e-06	1.40859e-06	0.000166339	2.37421e-06	2.6316e-06	0.000127299	2.09897e-06	1.83712e-06	1.644e-06	2.55238e-06	7.37731e-07	0.000294832	9.20272e-07	1.30006e-06	8.02322e-07	1.4198e-06	1.64122e-06	2.20084e-06	1.59243e-06	2.08268e-06	1.00542	1.07832	0.952213	1.03786	0.972282	1.06704	1.0282	1.05872	1.08515				1.02962	1.04168	0.981292	0.97996
	6.01111e-07	4.92946e-07	7.61622e-07	7.6893e-07	1.52411e-06	1.15854e-06	1.78291e-06	1.26616e-06	0.000178065	2.40896e-06	2.6466e-06	0.000131511	2.07272e-06	1.88358e-06	1.69997e-06	2.67051e-06	7.81517e-07	0.000300516	1.02553e-06	1.33477e-06	8.67138e-07	1.36032e-06	1.45322e-06	2.19732e-06	1.53018e-06	2.35391e-06	0.999297	1.0292	1.00236	0.966772	1.0436	1.02123	1.00652	0.951667	1.16165				1.01674	1.06802	1.0147	1.02531
	6.1723e-07	4.73046e-07	7.37957e-07	7.68647e-07	1.54791e-06	1.24337e-06	1.7939e-06	1.45242e-06	0.000174044	2.34257e-06	2.68767e-06	0.000125917	1.5941e-06	1.35467e-06	1.66467e-06	2.37909e-06	7.03879e-07	0.000300755	9.54471e-07	1.35967e-06	9.15012e-07	1.43426e-06	1.68187e-06	2.05362e-06	1.54101e-06	2.19184e-06	1.02609	0.987649	0.971212	0.966415	1.0599	1.09601	1.01272	1.09166	1.13542				0.781965	0.76812	0.993627	0.913428
																											0	0	0	0	0	0	0	0	0				0	0	0	0
																											0	0	0	0	0	0	0	0	0				0	0	0	0	#DIV/0!
																											0	0	0	0	0	0	0	0	0				0	0	0	0
	1.1131e-06	8.7974e-07	1.17523e-06	1.16738e-06	1.77739e-06	1.13866e-06	2.33128e-06	1.40467e-06	0.000447788	7.3566e-06	6.68339e-06	0.000414942					9.35557e-07	0.000363333	1.05243e-06	1.41751e-06	1.14228e-06	1.61345e-06	1.99677e-06	2.16014e-06	1.77906e-06	2.90219e-06	1.85043	1.83676		1.46774			1.31609		2.92126				1.13228		1.04751						1.65316
	1.05187e-06	8.71398e-07	1.24171e-06	1.14776e-06	1.82499e-06	1.31022e-06	2.26952e-06	1.47622e-06	0.000456332	6.18364e-06	5.43192e-06	0.00043813	2.30826e-06	2.08092e-06		3.0906e-06	1.43413e-06	0.000345167	1.03128e-06	1.37291e-06	1.18951e-06	1.92034e-06	1.80193e-06	2.40906e-06	1.66187e-06	2.58738e-06	1.74865	1.81935		1.44307					2.977				1.14795	1.17992		1.1866					1.64322
	1.02696e-06	7.67537e-07	1.18549e-06	1.12523e-06	1.83504e-06	1.32061e-06	2.35272e-06	1.53828e-06	0.000500979	7.27651e-06	6.46079e-06	0.000471074	2.3402e-06	2.04016e-06	1.75495e-06	3.08642e-06	1.60672e-06	0.00033127	1.38824e-06	1.37226e-06	9.99598e-07	1.91115e-06	2.02337e-06	2.09163e-06	1.64121e-06	2.65071e-06	1.70724	1.6025		1.41475			1.28122		3.26827				1.41023	1.15681		1.185					1.62825
	1.02822e-06	8.33719e-07	1.16859e-06	1.09656e-06	1.90763e-06	1.28979e-06	2.28755e-06	1.64989e-06	0.000452238	7.05973e-06	6.51317e-06	0.000420829	2.87488e-06	2.529e-06	1.71502e-06	3.71656e-06	7.45446e-07	0.000335203	1.40914e-06	1.49587e-06	1.05919e-06	1.95216e-06	1.81448e-06	2.64561e-06	1.78191e-06	2.95783e-06	1.70934	1.74068		1.3787			1.32819		2.9503				1.41133	1.43399	1.02368	1.42693					1.60035
	9.80639e-07	8.01439e-07	1.13682e-06	1.12635e-06	2.004e-06	1.51138e-06	2.63903e-06	1.70294e-06	0.000447396	7.57234e-06	6.73422e-06	0.000416157	2.87711e-06	2.60372e-06	2.21951e-06	3.92972e-06	7.10452e-07	0.000337721	1.21306e-06	1.56259e-06	1.13031e-06	1.77117e-06	1.88743e-06	2.38798e-06	1.64649e-06	2.66408e-06	1.63023	1.67328			1.21703		1.2914		2.9187				1.39495	1.47636	1.32481	1.50877					1.60395
	9.77423e-07	8.11444e-07	1.14812e-06	1.20407e-06	2.08459e-06	1.55627e-06	2.5105e-06	1.8014e-06	0.000467918	7.78209e-06	7.02948e-06	0.000422862	2.84372e-06	2.49643e-06	2.11772e-06	3.87807e-06	1.01987e-06	0.000357365	1.37351e-06	1.84343e-06	1.11777e-06	1.88456e-06	1.94533e-06	2.46662e-06	1.71404e-06	2.74285e-06	1.62489	1.69417			1.24962		1.48982		3.05259				1.10682	1.41552	1.26405	1.48895					1.59849
	9.38693e-07	7.07863e-07			1.83806e-06	1.39413e-06	2.2389e-06	1.58649e-06	0.000476007	7.7139e-06	6.87585e-06	0.000451354	2.25634e-06	1.87085e-06	2.09357e-06	3.34116e-06	7.24096e-07	0.000336212	1.43595e-06	1.77705e-06	1.27186e-06	1.80401e-06	2.01594e-06	2.61007e-06	1.71064e-06	2.87518e-06	1.5605	1.47791			1.25651		1.41727		3.10536				1.42338	1.06081	1.24964	1.2828					1.53713
	9.1055e-07	6.53294e-07			1.85943e-06	1.38173e-06	2.23541e-06	1.63509e-06	0.000508659	8.39806e-06	7.09518e-06	0.000490552	2.90168e-06	2.5127e-06	1.50793e-06	3.82133e-06	8.46852e-07	0.000323172	1.26466e-06	1.67572e-06	1.33486e-06	2.11093e-06	2.13003e-06	2.27112e-06	1.7773e-06	2.86168e-06	1.51371	1.36398			1.30621		1.26394	1.05578	3.31837				1.43589	1.42474	0.90007	1.46716					1.50498
	8.86954e-07	7.27654e-07			2.17152e-06	1.57553e-06	2.55511e-06	1.88286e-06	0.000506517	8.19877e-06	7.35969e-06	0.00045749	2.92718e-06	2.79874e-06	2.09938e-06	4.25202e-06	9.29955e-07	0.000326327	1.474e-06	1.84622e-06	1.22212e-06	1.8564e-06	2.21934e-06	2.42542e-06	1.91238e-06	2.97443e-06	1.47449	1.51923			1.3722	1.00371	1.26197	1.10955	3.3044				1.36554	1.58693	1.2531	1.63252					1.53488
	9.71231e-07	7.00718e-07			2.09718e-06	1.54267e-06	2.67963e-06	1.97167e-06	0.000491324	8.2969e-06	7.40832e-06	0.000463067	2.78377e-06	2.46e-06	2.35504e-06	3.87167e-06	7.45535e-07	0.000317733	1.29714e-06	1.79144e-06	1.32642e-06	1.83146e-06	2.2407e-06	2.65814e-06	1.86238e-06	3.1125e-06	1.61459	1.46299			1.42738	1.15494	1.44245	1.1562	3.20528				1.38959	1.39486	1.4057	1.48649					1.55822
	8.96409e-07	7.83089e-07			1.97102e-06	1.46928e-06	2.48561e-06	1.76377e-06	0.000509121	8.3157e-06	7.47055e-06	0.000454958	2.8328e-06	2.41823e-06	2.10256e-06	3.94939e-06	1.00293e-06	0.00033313	1.29224e-06	1.69909e-06	1.26694e-06	2.15327e-06	2.28878e-06	2.49037e-06	1.88654e-06	3.31158e-06	1.49021	1.63497			1.25857	1.16409	1.51275	1.24009	3.32139				1.25297	1.37118	1.255	1.51633					1.54705
	8.7465e-07	7.30768e-07			2.02081e-06	1.65553e-06	2.60588e-06	1.83289e-06	0.000497674	7.91165e-06	7.11668e-06	0.000444294	2.5543e-06	2.15421e-06	1.98603e-06	3.57128e-06	7.28389e-07	0.000344373	1.54882e-06	2.03264e-06	1.18504e-06	2.16445e-06	1.99365e-06	2.65294e-06	1.99699e-06	3.18574e-06	1.45403	1.52573			1.27321		1.40322	1.27996	3.24671				1.45563	1.22147	1.18545	1.37116					1.54166
	8.9236e-07	6.7132e-07			2.14343e-06	1.67592e-06	2.58522e-06	1.82448e-06	0.000484896	8.04737e-06	7.45082e-06	0.000448535	2.96743e-06	2.62069e-06	1.72349e-06	4.21566e-06	7.53151e-07	0.000346446	1.58323e-06	2.03869e-06	1.44629e-06	1.8912e-06	2.22739e-06	2.52474e-06	1.86052e-06	3.10357e-06	1.48348	1.40161			1.4869	1.13693	1.47111	1.35397	3.16335				1.52227	1.48598	1.02873	1.61856					1.55935
	9.09029e-07	7.01995e-07			2.09289e-06	1.59069e-06	2.61055e-06	1.81718e-06	0.000509791	8.90695e-06	7.7909e-06	0.000461045	3.10328e-06	2.75587e-06	2.22795e-06	4.24494e-06	9.90854e-07	0.00032237	1.29911e-06	1.75462e-06	1.46349e-06	2.43593e-06	2.12865e-06	2.74035e-06	2.01209e-06	3.35764e-06	1.51119	1.46566			1.436	1.33225	1.45945	1.19243	3.32575				1.47233	1.56263	1.32984	1.6298					1.61067
	8.67301e-07	6.87247e-07			2.03281e-06	1.47847e-06	2.37701e-06	1.69527e-06	0.000505869	8.83793e-06	7.9907e-06	0.000456066	3.00147e-06	2.68132e-06	2.31905e-06	4.1688e-06	9.14688e-07	0.000323247	1.5641e-06	2.33217e-06	1.22837e-06	1.99872e-06	2.44516e-06	3.05288e-06	1.87134e-06	3.05101e-06	1.44182	1.43487			1.34962	1.37182	1.47375	1.22896	3.30017				1.56635	1.52035	1.38422	1.60057					1.60659
	8.33526e-07	6.75354e-07			1.82516e-06	1.36998e-06	2.19269e-06	1.44352e-06	0.000480729	8.12324e-06	7.39108e-06	0.000447164	3.19313e-06	2.84195e-06	2.25635e-06	4.24099e-06	7.16992e-07	0.000334224	1.45638e-06	1.91461e-06	1.5323e-06	1.90956e-06	2.20742e-06	2.95022e-06	2.17633e-06	3.41495e-06	1.38567	1.41004			1.3837	1.2289	1.34191	1.41519	3.13616				1.51563	1.61143	1.34679	1.62828					1.58216
	8.62659e-07	7.07136e-07			1.8411e-06	1.45361e-06	2.38868e-06	1.67749e-06	0.000505015	8.33903e-06	7.52457e-06	0.000448933	3.08975e-06	2.56085e-06	2.4592e-06	4.14259e-06	8.75189e-07	0.000325734	1.36204e-06	1.81859e-06	1.38017e-06	2.3782e-06	2.14561e-06	2.61902e-06	1.9521e-06	3.2335e-06	1.4341	1.47639			1.46767	1.21797	1.23785	1.48194	3.2946				1.42742	1.45204	1.46788	1.5905					1.59531
	8.50927e-07	6.44406e-07			1.92137e-06	1.44312e-06	2.30566e-06	1.66974e-06	0.000513948	8.94035e-06	8.04774e-06	0.000470587	2.90992e-06	2.53045e-06	2.15429e-06	4.06117e-06	7.60424e-07	0.000330898	1.63255e-06	2.35073e-06	1.31008e-06	2.27419e-06	2.41742e-06	2.83085e-06	1.94885e-06	3.29809e-06	1.4146	1.34542			1.43306	1.3888	1.34849	1.32568	3.35288				1.41834	1.43481	1.28588	1.55924					1.57338
	8.98552e-07	7.0898e-07			1.79499e-06	1.30729e-06	2.19978e-06	1.70963e-06	0.000485709	7.96114e-06	7.48e-06	0.000426897	2.8914e-06	2.58248e-06	2.102e-06	3.96469e-06	7.66438e-07	0.000335523	1.39872e-06	2.38932e-06	1.51743e-06	2.17306e-06	2.28131e-06	2.84618e-06	2.04795e-06	3.43678e-06	1.49377	1.48024			1.39192	1.35984	1.30163	1.37763	3.16865				1.59054	1.46431	1.25466	1.5222					1.58231
	8.7019e-07	6.32666e-07			1.93872e-06	1.4624e-06	2.26105e-06	1.71963e-06	0.000468344	8.19573e-06	7.54675e-06	0.000430962	3.24245e-06	2.92186e-06	2.26116e-06	4.40553e-06	9.49251e-07	0.000336411	1.71657e-06	2.00732e-06	1.28411e-06	2.29716e-06	2.38009e-06	2.82889e-06	2.1167e-06	3.22572e-06	1.44662	1.32091			1.24974	1.29514	1.24186	1.37131	3.05537				1.51361	1.65674	1.34967	1.69146					1.56295
	8.49301e-07	6.37978e-07			1.75394e-06	1.42053e-06	2.25559e-06	1.60934e-06	0.000459906	7.71525e-06	7.2139e-06	0.000405564	3.08562e-06	2.74454e-06	2.54043e-06	4.26617e-06	7.45786e-07	0.000334977	1.66455e-06	2.16076e-06	1.45725e-06	2.43152e-06	2.32746e-06	3.25568e-06	2.05344e-06	3.65848e-06	1.41189	1.332			1.26066	1.45932	1.27644	1.36583	3.00032				1.47009	1.5562	1.51636	1.63795					1.57155
	7.99457e-07	6.33823e-07							0.000460914	8.22371e-06	7.63225e-06	0.00040071	2.99691e-06	2.45628e-06	2.33376e-06	3.85267e-06	7.16718e-07	0.000326817	1.38632e-06	2.39337e-06	1.37006e-06	2.36167e-06	2.49528e-06	3.04122e-06	2.17627e-06	3.49175e-06	1.32903	1.32333			1.31561	1.4773	1.27336	1.2742	3.00689				1.67979	1.39275	1.393	1.47919					1.5404
	7.79495e-07	5.96632e-07							0.000436917	7.04607e-06	6.63201e-06	0.000381836	3.42439e-06	2.96019e-06	2.11277e-06	4.47717e-06	7.11818e-07	0.000315777	1.61985e-06	2.24631e-06	1.45597e-06	2.11036e-06	2.09138e-06	2.87068e-06	1.77779e-06	3.08865e-06	1.29585	1.24568		1.41616	1.22908	1.40216		1.08498	2.85034				1.34323	1.67848	1.2611	1.71896					1.50236
	7.9153e-07	6.49714e-07							0.000481465	8.22811e-06	7.6837e-06	0.000421471	2.73828e-06	2.38599e-06	2.63856e-06	3.89876e-06	8.3699e-07	0.000332474	1.6929e-06	2.03147e-06	1.57535e-06	2.33994e-06	2.11956e-06	2.94019e-06	1.90982e-06	3.12809e-06	1.31585	1.3565		1.51387	1.32749	1.30324		1.26083	3.14096				1.50685	1.3529	1.57493	1.49689					1.55912
	7.6053e-07	6.55233e-07							0.000473231	8.09364e-06	7.44067e-06	0.000414883	3.07184e-06	2.8507e-06	1.90697e-06	4.25927e-06	9.35401e-07	0.000328334	1.64928e-06	2.01439e-06	1.58706e-06	2.29264e-06	2.28123e-06	2.71604e-06	2.00461e-06	3.16636e-06	1.26432	1.36803	1.5467		1.20098	1.20761		1.25501	3.08725				1.2854	1.61639	1.13825	1.6353					1.50957
	8.12754e-07	6.48441e-07							0.000494235	8.51824e-06	7.82902e-06	0.000435364	2.6204e-06	2.30395e-06	2.38365e-06	3.94983e-06	8.45699e-07	0.00033425	1.5794e-06	2.3027e-06	1.38422e-06	2.37413e-06	2.48387e-06	2.89823e-06	2.09373e-06	3.46138e-06	1.35114	1.35385	1.63419			1.28133		1.28499	3.22427				1.4278	1.30638	1.42278	1.5165					1.58032
	7.65584e-07	5.88909e-07							0.000515002	8.26644e-06	7.68648e-06	0.00043053	2.9107e-06	2.705e-06	2.1022e-06	4.16714e-06	7.5722e-07	0.000314992	1.64122e-06	2.34014e-06	1.50588e-06	2.08268e-06	2.24866e-06	2.96636e-06	1.90977e-06	3.37739e-06	1.27272	1.22955	1.56021			1.27208		1.2925	3.35975				1.37416	1.53378	1.25479	1.59993					1.57495
	7.87957e-07	5.80036e-07							0.000477229	8.09267e-06	7.44498e-06	0.000404723	2.80135e-06	2.50561e-06	2.13869e-06	3.86652e-06	7.78e-07	0.000319164	1.74467e-06	2.20084e-06	1.59243e-06	2.35391e-06	2.20307e-06	3.06572e-06	1.79312e-06	3.30052e-06	1.30991	1.21103	1.53796			1.15235		1.20961	3.11333				1.46692	1.42072	1.27657	1.48451					1.51829
	7.83359e-07	5.61762e-07							0.000450442	7.67052e-06	7.22009e-06	0.000382132	2.99045e-06	2.70871e-06	2.10845e-06	4.19145e-06	9.15676e-07	0.000320639	1.45322e-06	2.19732e-06	1.53018e-06	2.43417e-06	2.43734e-06	3.00714e-06	2.03331e-06	3.36362e-06	1.30227	1.17287	1.49615			1.28908			2.93858				1.28297	1.53588	1.25852	1.60926					1.54284
	7.97183e-07	5.91073e-07							0.00040694	6.55538e-06	6.409e-06	0.00034011	2.61544e-06	2.37597e-06	2.41795e-06	3.83298e-06	8.40184e-07	0.000316968	1.68187e-06	2.05362e-06	1.54101e-06	2.19184e-06	2.25482e-06	2.92638e-06	1.94173e-06	3.18629e-06	1.32525	1.23407	1.51102			1.25217			2.65478					1.34721	1.44325	1.47163					1.52992

## Sheet: ACSF
	211011-1-1	211011-1-2	211011-1-3	211011-1-4	211011-2-1	211011-2-3	211011-2-4	211018-4	211025-2	211027-1	211027-2	211027-3	211027-4	220117-2	220117-4	220118-1-1	220118-1-3	20220127									5.98876e-07	8.05072e-07	6.00486e-07	7.90699e-07	5.98876e-07	0.000229748	5.39071e-07	3.5708e-05	9.57344e-05	0.000102216	1.09448e-06	0.000158562	5.90723e-05
	6.00292e-07	8.39731e-07	6.80112e-07	8.2033e-07	6.00292e-07	0.000226795	5.00891e-07	3.47975e-05	0.000100002	9.18352e-05	1.04607e-06	0.000143706	5.50402e-05	0.000121148	2.02095e-06	8.69553e-07	1.34547e-06	3.1125e-06									1.00236	1.04305	1.1326	1.03747	1.00236	0.987145	0.929175	0.974501	1.04457	0.898442	0.906903	0.906302	0.931743
	5.88367e-07	8.83845e-07	5.72919e-07	8.26636e-07	5.88367e-07	0.000223979	4.97421e-07	3.40845e-05	9.62309e-05	0.000104251	1.10947e-06	0.00016266	6.21739e-05	0.000125246	1.9609e-06	8.5152e-07	1.3714e-06	3.18574e-06									0.982452	1.09785	0.954092	1.04545	0.982452	0.974892	0.922737	0.954535	1.00519	1.01991	0.961862	1.02584	1.0525
	5.87366e-07	7.58926e-07	5.42631e-07	8.15572e-07	5.87366e-07	0.000228653	6.11199e-07	3.36472e-05	9.66783e-05	8.99923e-05	9.52312e-07	0.00017229	4.53385e-05	0.000126989	2.01101e-06	7.50137e-07	1.29817e-06	3.10357e-06									0.980781	0.942681	0.903653	1.03146	0.980781	0.995233	1.1338	0.942288	1.00986	0.880413	0.825615	1.08658	0.767509
	5.75987e-07	7.41799e-07	5.31268e-07	8.00792e-07	5.75987e-07	0.00022585	5.20609e-07	3.67584e-05	9.8021e-05	0.000106183	1.13014e-06	0.000145302	6.40828e-05	0.00012565	1.79734e-06	8.0443e-07	1.37655e-06	3.05101e-06									0.96178	0.921407	0.88473	1.01276	0.96178	0.983034	0.965753	1.02942	1.02388	1.0388	0.979787	0.916374	1.08482
	6.15273e-07	7.45063e-07	6.20111e-07	7.47794e-07	6.15273e-07	0.000233554	5.32818e-07	3.72909e-05	9.7212e-05	0.00011088	1.19932e-06	0.00016005	7.2779e-05	0.000127494	1.60776e-06	8.69673e-07	1.1774e-06	3.08865e-06									1.02738	0.925461	1.03268	0.945738	1.02738	1.01656	0.988401	1.04433	1.01543	1.08476	1.03976	1.00938	1.23203
	5.72854e-07	8.79989e-07	6.49442e-07	7.37974e-07	5.72854e-07	0.000225206	5.4761e-07	3.38786e-05	9.93462e-05	8.88484e-05	1.21228e-06	0.000168941	6.72248e-05	0.000130731	1.51462e-06	8.57153e-07	1.36044e-06	3.12809e-06									0.956549	1.09306	1.08153	0.933318	0.956549	0.980228	1.01584	0.948768	1.03773	0.869222	1.051	1.06546	1.13801
	6.28159e-07	8.27299e-07	6.37515e-07	7.6351e-07	6.28159e-07	0.00023728	5.67794e-07	3.73177e-05	9.05468e-05	0.000112774	9.43652e-07	0.000145643	4.25649e-05	0.000126113	1.51633e-06	7.75737e-07	1.20958e-06	3.16636e-06									1.0489	1.02761	1.06167	0.965614	1.0489	1.03278	1.05328	1.04508	0.945813	1.10329	0.818107	0.918518	0.720556
	6.22709e-07	7.63924e-07	5.6989e-07	8.12982e-07	6.22709e-07	0.000236669	5.34226e-07	3.7889e-05	8.78383e-05	0.000112964	1.16257e-06	0.000169908	6.33743e-05	0.000127798	1.5536e-06	8.39886e-07	1.1688e-06	3.18629e-06									1.0398	0.948889	0.949048	1.02818	1.0398	1.03012	0.991013	1.06108	0.917521	1.10515	1.0079	1.07155	1.07283
	7.49558e-07	7.64067e-07	5.94121e-07	8.26794e-07	7.49558e-07	0.000247967	5.76201e-07		7.4418e-05	0.000123557			6.27646e-05	0.000106598	1.48224e-06	8.60629e-07	1.85252e-06										1.25161	0.949067	0.989401	1.04565	1.25161	1.0793	1.06888			1.20878	0.933708		1.0625
	7.06459e-07	8.59163e-07	5.88552e-07	7.96818e-07	7.06459e-07	0.000256736	5.55126e-07		7.16704e-05			0.000159816	8.05343e-05	0.000104974	1.47621e-06	7.31518e-07	1.23567e-06										1.17964	1.06719	0.980127	1.00774	1.17964	1.11747	1.02978				1.01663	1.0079	1.36332
	7.11309e-07	8.1947e-07	6.26022e-07	7.77923e-07	7.11309e-07	0.00025723	5.72312e-07		7.11685e-05	0.000128125			8.76327e-05	0.000113839	1.72979e-06	1.44061e-06	1.12386e-06										1.18774	1.01788	1.04253	0.983842	1.18774	1.11962	1.06166		0.777338	1.25347			1.48348
	7.19068e-07	8.33868e-07	6.43275e-07	8.61348e-07	7.19068e-07	0.000256324	5.67648e-07		7.02256e-05			0.000189305	8.3338e-05	0.000116557	1.84009e-06	1.08832e-06	1.88506e-06										1.2007	1.03577	1.07126	1.08935	1.2007	1.11567	1.05301		0.748638			1.19388	1.41078
	7.29255e-07	8.40611e-07	5.65212e-07	7.8908e-07	7.29255e-07	0.00025756	6.16245e-07		7.14431e-05	0.00012128			8.197e-05	0.000121283	1.65642e-06	8.88862e-07	1.36994e-06										1.21771	1.04414	0.941258	0.997953	1.21771	1.12105	1.14316		0.743396	1.1865			1.38762
	7.0595e-07	7.9794e-07	5.65478e-07	8.37009e-07	7.0595e-07	0.000251561	6.29072e-07		7.69311e-05			0.000192761	7.07357e-05	0.000119383	2.01658e-06	1.24141e-06	1.20094e-06										1.17879	0.991141	0.941701	1.05857	1.17879	1.09494	1.16696		0.733546		1.19928	1.21568
	6.89073e-07	8.25214e-07	5.8634e-07	8.5821e-07	6.89073e-07	0.000246841	6.10526e-07		7.77329e-05	0.000119328			7.83821e-05	0.000138521	2.06105e-06	1.26426e-06	1.72437e-06										1.15061	1.02502	0.976442	1.08538	1.15061	1.0744	1.13255		0.746264	1.16741			1.19744
	6.91187e-07	8.45392e-07	5.28303e-07	7.06707e-07	6.91187e-07	0.000248372	5.24797e-07		7.68172e-05			0.000180471	7.15004e-05	0.000137776	1.76138e-06	7.66457e-07	1.6813e-06										1.15414	1.05008	0.879792	0.893775	1.15414	1.08106	0.97352				1.14283	1.13817	1.32688
	6.65146e-07	7.71018e-07	5.82294e-07	8.9313e-07	6.65146e-07	0.000244527	4.99687e-07			0.000111862	1.07699e-06		6.61724e-05	0.000145394	1.52267e-06	8.82461e-07	1.20973e-06										1.11066	0.9577	0.969704	1.12955	1.11066	1.06433	0.926941					1.13151	1.21039
	6.12192e-07	7.92137e-07	6.18147e-07	8.73066e-07	6.12192e-07	0.000238364	5.78544e-07				1.17264e-06	0.000179415	7.77163e-05	0.000118901	1.75589e-06	8.08712e-07	1.41194e-06										1.02223	0.983933	1.02941	1.10417	1.02223	1.0375	1.07322				0.845036		1.12019
	6.55782e-07	8.75335e-07	6.00211e-07	7.64537e-07	6.55782e-07	0.000244496	4.92884e-07			0.000115382	1.38332e-06		6.47507e-05	0.000116485	1.84679e-06	7.03611e-07	1.72384e-06	2.88656e-06									1.09502	1.08728	0.999541	0.966913	1.09502	1.06419	0.914321		0.803589			1.10187	1.31561
	6.74787e-07	8.81814e-07	6.48685e-07	8.51373e-07	6.74787e-07	0.000238308	5.52405e-07				1.31821e-06	0.000174715	5.96785e-05	0.000125857	1.93907e-06	6.66198e-07	1.33411e-06	3.07882e-06									1.12676	1.09532	1.08027	1.07674	1.12676	1.03726	1.02474		0.811964				1.09613
	6.64731e-07	8.52253e-07	6.46507e-07	8.56536e-07	6.64731e-07	0.000233248	5.47283e-07			0.000105155	9.74713e-07		7.09532e-05	0.00013229	1.93313e-06	9.82582e-07	1.2701e-06	3.00866e-06									1.10997	1.0586	1.07664	1.08326	1.10997	1.01523	1.01523		0.802399				1.01026
	6.21658e-07	8.51895e-07	6.08047e-07	7.50154e-07	6.21658e-07	0.000239051	5.98557e-07				1.13186e-06	0.000168812		0.000123372	2.03561e-06	7.99071e-07	9.93838e-07	2.95597e-06									1.03804	1.05816	1.01259	0.948722	1.03804	1.04049	1.11035				0.981272	1.06464
	6.42282e-07	8.52306e-07	4.94515e-07	7.97343e-07	6.42282e-07	0.000237397	5.83241e-07			9.99105e-05	9.85452e-07		5.68298e-05	0.00012251	1.94788e-06	9.32647e-07	1.33493e-06	3.4343e-06									1.07248	1.05867	0.823524	1.0084	1.07248	1.03329	1.08194				0.854347		1.20113
	6.86268e-07	8.92451e-07	5.65949e-07	7.97147e-07	6.86268e-07	0.000232124	5.29792e-07	3.63995e-05				0.000163215	5.45165e-05	0.000130806	1.89329e-06	1.02873e-06	1.37919e-06	3.17588e-06									1.14593	1.10854	0.942485	1.00815	1.14593	1.01034	0.982786	1.01937			0.90663	1.02934	0.962038
	6.60675e-07	8.54873e-07	6.17823e-07	8.49494e-07	6.60675e-07	0.000226399	4.68892e-07	3.55237e-05		0.000109965			5.27698e-05	0.000135409	1.75707e-06	9.90132e-07	1.42019e-06	3.30219e-06									1.10319	1.06186	1.02887	1.07436	1.10319	0.985425	0.869814	0.994839			0.860248		0.922879
	6.23364e-07	8.44459e-07	6.6224e-07	7.57376e-07	6.23364e-07	0.000219017	4.74654e-07	3.49313e-05				0.000151372		0.000125165	1.60264e-06	8.73108e-07	1.54867e-06	3.22035e-06									1.04089	1.04892	1.10284	0.957857	1.04089	0.953294	0.880504	0.978248			0.819273	0.954655
	6.14855e-07	8.36682e-07	6.39174e-07	8.03092e-07	6.14855e-07	0.000227934	5.40516e-07	3.5001e-05		9.65522e-05				0.000124514	1.74609e-06	1.09165e-06	1.53e-06	2.89586e-06									1.02668	1.03926	1.06443	1.01567	1.02668	0.992103	1.00268	0.9802			0.838228		0.893309
	6.16827e-07	8.21733e-07	6.23322e-07	8.44804e-07	6.16827e-07	0.000220143	4.79224e-07	3.5664e-05				0.000160972		0.000115976	1.80581e-06	8.18569e-07	1.32991e-06	3.08276e-06									1.02997	1.0207	1.03803	1.06843	1.02997	0.958194	0.88898	0.998768			0.884792	1.0152
	5.8956e-07	8.83298e-07	5.87703e-07	7.75025e-07	5.8956e-07	0.000225183	4.61037e-07	3.78868e-05		8.86119e-05				0.000126304	1.71769e-06	8.61673e-07	1.58376e-06	3.31349e-06									0.984444	1.09717	0.978712	0.980177	0.984444	0.98013	0.855244	1.06102				0.912014
	6.23986e-07	8.809e-07	6.6885e-07	7.52483e-07	6.23986e-07	0.000230398	4.56421e-07	3.46063e-05			1.04576e-06			0.00012538	1.90136e-06	8.12364e-07	1.20579e-06	3.15774e-06									1.04193	1.09419	1.11385	0.951669	1.04193	1.00283	0.84668	0.969147				0.856927
	6.06255e-07	8.76065e-07	5.02842e-07	8.08355e-07	6.06255e-07	0.000224616	4.5721e-07	3.39887e-05		0.000102221				0.00012028	1.73713e-06	7.58817e-07	1.35595e-06	2.93161e-06									1.01232	1.08818	0.837392	1.02233	1.01232	0.977663	0.848145	0.951853		1.09437
	5.94031e-07	8.48716e-07	5.2949e-07	8.17371e-07	5.94031e-07	0.000221458	4.49716e-07	3.35444e-05			9.92259e-07			0.000129493	1.5922e-06	9.23679e-07	1.19644e-06	3.16681e-06									0.99191	1.05421	0.88177	1.03373	0.99191	0.963916	0.834242	0.939409		1.12881
	6.21367e-07	7.75342e-07	4.9768e-07	8.05068e-07	6.21367e-07	0.00022719	4.52856e-07	3.83775e-05				0.000144611		0.000131546	1.75041e-06	6.69155e-07	1.69543e-06	3.08578e-06									1.03756	0.963071	0.828795	1.01817	1.03756	0.988863	0.840066	1.07476		1.02875
	5.60347e-07	8.28221e-07	5.51636e-07	7.27885e-07	5.60347e-07	0.000223725	4.68564e-07	3.60065e-05			9.44996e-07			0.000120899	1.77606e-06	7.87604e-07	1.12446e-06	3.10374e-06									0.935665	1.02875	0.91865	0.920559	0.935665	0.973782	0.869207	1.00836		0.977444		0.963132
	6.07131e-07	8.08815e-07	5.47191e-07	7.23165e-07	6.07131e-07	0.00022068	5.20886e-07	3.59279e-05				0.000135876		0.000128681	1.8089e-06	9.00756e-07	1.0445e-06	3.00501e-06									1.01378	1.00465	0.911246	0.91459	1.01378	0.960529	0.966265	1.00616		1.07581
	6.04796e-07	8.30486e-07	6.28969e-07	8.47024e-07	6.04796e-07	0.000231799	5.16473e-07	3.45534e-05			9.6686e-07			0.000132872	1.48666e-06	7.05448e-07	1.26479e-06	3.17773e-06									1.00989	1.03157	1.04743	1.07124	1.00989	1.00892	0.958079	0.967667		0.944589
	6.01111e-07	8.15764e-07	6.55415e-07	8.69299e-07	6.01111e-07	0.000230671	4.92946e-07	3.52093e-05				0.000152717		0.000120086	1.75329e-06	8.40933e-07	1.50945e-06	2.78079e-06									1.00373	1.01328	1.09147	1.09941	1.00373	1.00402	0.914436	0.986036		0.866908
	6.1723e-07	8.64193e-07	5.64602e-07	7.64279e-07	6.1723e-07	0.000220361	4.73046e-07	3.4797e-05			1.02057e-06			0.000119701	1.63483e-06	8.38586e-07	1.1058e-06	2.93225e-06									1.03065	1.07344	0.940243	0.966587	1.03065	0.959141	0.877521	0.974488		1.00004
																											0.96178	0.921407	0.88473	1.01276	0.96178	0.983034	0.965753	1.02942	1.02388	1.0388	0.979787	0.916374	1.08482
																											1.02738	0.925461	1.03268	0.945738	1.02738	1.01656	0.988401	1.04433	1.01543	1.08476	1.03976	1.00938	1.23203
																											0.956549	1.09306	1.08153	0.933318	0.956549	0.980228	1.01584	0.948768	1.03773	0.869222	1.051	1.06546	1.13801
																											1.0489	1.02761	1.06167	0.965614	1.0489	1.03278	1.05328	1.04508	0.945813	1.10329	0.818107	0.918518	0.720556
																											1.0398	0.948889	0.949048	1.02818	1.0398	1.03012	0.991013	1.06108	0.917521	1.10515	1.0079	1.07155	1.07283
																											0.935665	1.02875	0.91865	0.920559	0.935665	0.973782	0.869207	1.00836	0.953122	0.977444	0.953122	0.953122	1.01026
																											1.01378	1.00465	0.911246	0.91459	1.01378	0.960529	0.966265	1.00616	0.985202	1.07581	0.985202	0.985202	1.20113
																											1.00989	1.03157	1.04743	1.07124	1.00989	1.00892	0.958079	0.967667	1.00547	0.944589	1.00547	1.00547	0.962038
																											1.00373	1.01328	1.09147	1.09941	1.00373	1.00402	0.914436	0.986036	0.998114	0.866908	0.998114	0.998114	0.922879
																											1.03065	1.07344	0.940243	0.966587	1.03065	0.959141	0.877521	0.974488	0.98364	1.00004	0.98364	0.98364	0.893309

## Sheet: CCK-2
	211011-1	211011-2	211011-4	211021-1	211021-2	211026-1	211026-2	220118	220126-1-3	220126-1-4	220127-1-1	220127-1-3	220127-2-1	220127-2-4	211026-1-2			N=6									6.26835e-07	6.01533e-07	4.52872e-07	0.0002709	1.77137e-06	2.40331e-06	2.60458e-06	2.2505e-06	0.000297561	0.00018381	9.41888e-07	8.65006e-07	1.6328e-06	2.2634e-06
	6.18624e-07	6.06255e-07	4.61037e-07	0.000236693	1.65155e-06	2.41643e-06	3.01006e-06	2.13466e-06	0.000288923	0.000175964	9.58375e-07	8.97443e-07	1.61985e-06	2.36167e-06	2.31282e-06			n=14									0.986901	1.00785	1.01803	0.873727	0.932357	1.00546	1.69929	1.20509	0.97097		1.0175	1.0375	0.992067	1.04342
	6.58409e-07	5.94031e-07	4.56421e-07	0.000261579	1.8008e-06	2.20109e-06	2.59857e-06	2.02865e-06	0.000297467	0.000185019	8.96381e-07	8.50335e-07	1.6929e-06	2.11036e-06	2.01435e-06												1.05037	0.987528	1.00784	0.965592	1.01661	0.915856	0.997694	0.901422	0.999681		0.951685	0.983039	1.03681	0.932386
	6.25197e-07	6.21367e-07	4.5721e-07	0.000261788	1.66488e-06	2.24903e-06	2.40838e-06	2.39339e-06	0.000298661	0.000183974	9.8128e-07	9.24985e-07	1.64928e-06	2.33994e-06	2.12577e-06												0.997387	1.03297	1.00958	0.966362	0.939886	0.935804	0.924672	1.06349	1.0037		1.04182	1.06934	1.01009	1.03382
	5.94041e-07	5.60347e-07	4.49716e-07	0.000280269	1.7239e-06	2.10021e-06	2.73104e-06	2.43019e-06	0.000302233	0.000187042	8.45971e-07	8.06346e-07	1.5794e-06	2.29264e-06	2.02095e-06												0.947684	0.931531	0.99303	1.03458	0.973201	0.873882	1.04855	1.07984	1.0157		0.898165	0.932186	0.967294	1.01292
	5.95968e-07	6.07131e-07	4.52856e-07	0.000279521	1.93169e-06	2.29388e-06	2.48658e-06	2.34219e-06	0.000297105	0.000185142	9.52825e-07	8.56468e-07	1.64122e-06	2.37413e-06	2.24027e-06												0.950758	1.00931	0.999963	1.03182	1.09051	0.954465	0.954696	1.04074	0.998465		1.01161	0.990129	1.00516	1.04893
	6.51785e-07	6.04796e-07	4.31901e-07	0.000277509	1.82132e-06	2.6316e-06	2.55238e-06	1.92922e-06	0.000294832	0.000180126	9.20272e-07	8.02322e-07	1.74467e-06	2.08268e-06	2.37421e-06												1.0398	1.00542	0.953692	1.0244	1.0282	1.09499	0.97996	0.85724	0.990828		0.977051	0.927533	1.06851	0.920159
	6.47348e-07	6.01111e-07	4.73046e-07	0.000292558	1.78291e-06	2.6466e-06	2.67051e-06	2.35639e-06	0.000300516	0.000184503	1.02553e-06	8.67138e-07	1.45322e-06	2.35391e-06	2.40896e-06												1.03273	0.999297	1.04455	1.07995	1.00652	1.10123	1.02531	1.04705	1.00993		1.0888	1.00246	0.890019	1.03999
	6.23306e-07	6.1723e-07	4.40792e-07	0.000277284	1.7939e-06	2.68767e-06	2.37909e-06	2.38933e-06	0.000300755	0.000188708	9.54471e-07	9.15012e-07	1.68187e-06	2.19184e-06	2.34257e-06												0.99437	1.02609	0.973325	1.02357	1.01272	1.11832	0.913428	1.06169	1.01073		1.01336	1.05781	1.03005	0.968384
																																0							0
																											0.993068	0.99433	0.992911	1.03886	1.02223	1.02858	0.98439	1.01731	0.000297561		0.997798	0.982024	0.992207	0.998076
																																0							0
	8.07479e-07	1.1131e-06	7.67537e-07	0.000365173		6.68339e-06		2.87039e-06	0.000363333	0.00025619	1.38824e-06	1.14228e-06	1.99677e-06	2.90219e-06													1.28818	1.85043	1.69482	1.348		2.78091	1.1866	1.27544	1.22103		1.47389	1.32055	1.22291	1.28223
	7.63068e-07	1.05187e-06	8.33719e-07	0.000329294		5.43192e-06	3.0906e-06	2.88967e-06	0.000345167	0.000237191	1.40914e-06	1.18951e-06	1.80193e-06	2.58738e-06	7.3566e-06												1.21734	1.74865	1.84096	1.21555		2.26018		1.28401	1.15998		1.49608	1.37515	1.10358	1.14314
	7.45854e-07	1.02696e-06	8.01439e-07	0.00031583		6.46079e-06	3.08642e-06	2.96534e-06	0.00033127	0.000224188	1.44171e-06	9.99598e-07	2.02337e-06	2.65071e-06	6.18364e-06												1.18987	1.70724	1.76968	1.16586		2.68828	1.185	1.31763	1.11328		1.53066	1.1556	1.23921	1.17112
	7.17866e-07	1.02822e-06	8.11444e-07	0.00032355		6.51317e-06	3.71656e-06	2.79583e-06	0.000335203	0.000224858	1.37351e-06	1.05919e-06	1.81448e-06	2.95783e-06	7.27651e-06												1.14522	1.70934	1.79177	1.19435		2.71008	1.42693	1.24231	1.1265		1.45825	1.22449	1.11127	1.30681
	7.27816e-07	9.80639e-07	7.07863e-07	0.000300399		6.73422e-06	3.92972e-06	2.87311e-06	0.000337721	0.00023753	1.43595e-06	1.13031e-06	1.88743e-06	2.66408e-06	7.05973e-06												1.1611	1.63023	1.56305	1.10889		2.80206	1.50877	1.27665	1.13496		1.52454	1.30671	1.15595	1.17703
	6.31994e-07	9.77423e-07	6.53294e-07	0.000332322		7.02948e-06	3.87807e-06	2.64802e-06	0.000357365	0.000250423	1.26466e-06	1.11777e-06	1.94533e-06	2.74285e-06	7.57234e-06												1.00823	1.62489	1.44256	1.22673		2.92491	1.48895	1.17663	1.20098		1.34269	1.29221	1.19141	1.21183
	6.29085e-07	9.38693e-07	7.27654e-07	0.000318474		6.87585e-06	3.34116e-06	2.68877e-06	0.000336212	0.000227204	1.474e-06	1.27186e-06	2.01594e-06	2.87518e-06	7.78209e-06												1.00359	1.5605	1.60675	1.17561		2.86099	1.2828	1.19474	1.12989		1.56494	1.47034	1.23465	1.27029
	6.51352e-07	9.1055e-07	7.00718e-07	0.000320808		7.09518e-06	3.82133e-06	2.65064e-06	0.000323172	0.000222648	1.29714e-06	1.33486e-06	2.13003e-06	2.86168e-06	7.7139e-06												1.03911	1.51371	1.54728	1.18423		2.95225	1.46716	1.1778	1.08607		1.37717	1.54318	1.30453	1.26433
	7.15766e-07	8.86954e-07	7.83089e-07	0.000312658		7.35969e-06	4.25202e-06	2.37395e-06	0.000326327	0.000208973	1.29224e-06	1.22212e-06	2.21934e-06	2.97443e-06	8.39806e-06												1.14187	1.47449	1.72916	1.15415		3.06231	1.63252	1.05485	1.09667		1.37197	1.41285	1.35922	1.31414
	6.63825e-07	9.71231e-07	7.30768e-07	0.000299465	2.33128e-06	7.40832e-06	3.87167e-06	2.79864e-06	0.000317733	0.000204761	1.54882e-06	1.32642e-06	2.2407e-06	3.1125e-06	8.19877e-06												1.05901	1.61459	1.61363	1.10544	1.31609	3.08254	1.48649	1.24356	1.06779		1.64438	1.53342	1.37231	1.37515
	6.6979e-07	8.96409e-07	6.7132e-07	0.000309866	2.26952e-06	7.47055e-06	3.94939e-06	2.52049e-06	0.00033313	0.00021582	1.58323e-06	1.26694e-06	2.28878e-06	3.31158e-06	8.2969e-06												1.06853	1.49021	1.48236	1.14384	1.28122	3.10844	1.51633	1.11997	1.11953		1.68091	1.46466	1.40175	1.4631
	7.4286e-07	8.7465e-07	7.01995e-07	0.00032006	2.35272e-06	7.11668e-06	3.57128e-06	2.51646e-06	0.000344373	0.000220213	1.29911e-06	1.18504e-06	1.99365e-06	3.18574e-06	8.3157e-06												1.1851	1.45403	1.5501	1.18147	1.32819	2.9612	1.37116	1.11818	1.15732		1.37926	1.36997	1.221	1.4075
	6.62279e-07	8.9236e-07	6.87247e-07	0.000310944	2.28755e-06	7.45082e-06	4.21566e-06	2.27983e-06	0.000346446	0.000231362	1.5641e-06	1.44629e-06	2.22739e-06	3.10357e-06	7.91165e-06												1.05655	1.48348	1.51753	1.14782	1.2914	3.10023	1.61856	1.01303	1.16428		1.6606	1.672	1.36415	1.3712
	6.84326e-07	9.09029e-07	6.75354e-07	0.000312871	2.63903e-06	7.7909e-06	4.24494e-06	2.51942e-06	0.00032237	0.000203475	1.45638e-06	1.46349e-06	2.12865e-06	3.35764e-06	8.04737e-06												1.09172	1.51119	1.49127	1.15493	1.48982	3.24173	1.6298	1.11949	1.08337		1.54623	1.69189	1.30368	1.48345
	7.12529e-07	8.67301e-07	7.07136e-07	0.000309059	2.5105e-06	7.9907e-06	4.1688e-06	2.43513e-06	0.000323247	0.000226838	1.36204e-06	1.22837e-06	2.44516e-06	3.05101e-06	8.90695e-06												1.13671	1.44182	1.56145	1.14086	1.41727	3.32487	1.60057	1.08204	1.08632		1.44608	1.42008	1.49753	1.34798
	7.46386e-07	8.33526e-07	6.44406e-07	0.000296406	2.2389e-06	7.39108e-06	4.24099e-06	2.5408e-06	0.000334224	0.000220493	1.76718e-06	1.5323e-06	2.20742e-06	3.41495e-06	8.83793e-06												1.19072	1.38567	1.42293	1.09415	1.26394	3.07537	1.62828	1.12899	1.12321		1.87621	1.77144	1.35192	1.50877
	6.65808e-07	8.62659e-07	7.0898e-07	0.000310351	2.23541e-06	7.52457e-06	4.14259e-06	2.50577e-06	0.000325734	0.000223822	1.63255e-06	1.38017e-06	2.14561e-06	3.2335e-06	8.12324e-06												1.06218	1.4341	1.56552	1.14563	1.26197	3.13091	1.5905	1.11343	1.09468		1.73327	1.59556	1.31407	1.42861
	7.27624e-07	8.50927e-07	6.32666e-07	0.000316041	2.55511e-06	8.04774e-06	4.06117e-06	2.43339e-06	0.000330898	0.000201545	1.39872e-06	1.31008e-06	2.41742e-06	3.29809e-06	8.33903e-06												1.16079	1.4146	1.39701	1.16663	1.44245	3.3486	1.55924	1.08126	1.11203		1.48502	1.51454	1.48053	1.45714
	6.78806e-07	8.98552e-07	6.37978e-07	0.000308776	2.67963e-06	7.48e-06	3.96469e-06	2.36431e-06	0.000335523	0.000200856	1.71657e-06	1.51743e-06	2.28131e-06	3.43678e-06	8.94035e-06												1.08291	1.49377	1.40874	1.13982	1.51275	3.11237	1.5222	1.05057	1.12758		1.82247	1.75425	1.39718	1.51842
	6.94095e-07	8.7019e-07	6.33823e-07	0.000293556	2.48561e-06	7.54675e-06	4.40553e-06	2.47933e-06	0.000336411	0.000213218	1.81112e-06	1.28411e-06	2.38009e-06	3.22572e-06	7.96114e-06												1.1073	1.44662	1.39956	1.08363	1.40322	3.14014	1.69146	1.10168	1.13056		1.92286	1.48452	1.45767	1.42517
	6.91991e-07	8.49301e-07	5.96632e-07	0.00029924	2.60588e-06	7.2139e-06	4.26617e-06	2.47002e-06	0.000334977	0.000213324	1.66455e-06	1.45725e-06	2.32746e-06	3.65848e-06	8.19573e-06												1.10394	1.41189	1.31744	1.10461	1.47111	3.00165	1.63795	1.09754	1.12574		1.76725	1.68467	1.42544	1.61637
	7.0157e-07	7.99457e-07	6.49714e-07	0.000303692	2.58522e-06	7.63225e-06	3.85267e-06	2.41539e-06	0.000326817	0.000209224	1.38632e-06	1.37006e-06	2.49528e-06	3.49175e-06	7.71525e-06												1.11923	1.32903	1.43465	1.12105	1.45945	3.17572	1.47919	1.07326	1.09832		1.47185	1.58387	1.52822	1.5427
	6.62024e-07	7.79495e-07	6.55233e-07	0.000302879	2.61055e-06	6.63201e-06	4.47717e-06	2.46785e-06	0.000315777	0.0002062	1.61985e-06	1.45597e-06	2.09138e-06	3.08865e-06	8.22371e-06												1.05614	1.29585	1.44684	1.11805	1.47375	2.75953	1.71896	1.09658	1.06122		1.71979	1.68319	1.28085	1.36461
	7.03229e-07	7.9153e-07	6.48441e-07	0.000306823	2.37701e-06	7.6837e-06	3.89876e-06	2.5712e-06	0.000332474	0.000197974	1.6929e-06	1.57535e-06	2.11956e-06	3.12809e-06	7.04607e-06												1.12187	1.31585	1.43184	1.1326	1.34191	3.19713	1.49689	1.1425	1.11733		1.79735	1.82121	1.29812	1.38203
	7.18783e-07	7.6053e-07	5.88909e-07	0.000305295	2.19269e-06	7.44067e-06	4.25927e-06	2.37063e-06	0.000328334	0.00019347	1.64928e-06	1.58706e-06	2.28123e-06	3.16636e-06	8.22811e-06												1.14669	1.26432	1.30039	1.12697	1.23785	3.09601	1.6353	1.05338	1.10342		1.75103	1.83474	1.39713	1.39894
	7.16942e-07	8.12754e-07	5.80036e-07	0.000310456	2.38868e-06	7.82902e-06	3.94983e-06	2.74805e-06	0.00033425	0.000198226	1.5794e-06	1.38422e-06	2.48387e-06	3.46138e-06	8.09364e-06												1.14375	1.35114	1.28079	1.14602	1.34849	3.25759	1.5165	1.22108	1.1233		1.67684	1.60024	1.52123	1.52929
	6.61227e-07	7.65584e-07	5.60445e-07	0.000314729	2.30566e-06	7.68648e-06	4.16714e-06	2.3985e-06	0.000314992	0.000195363	1.64122e-06	1.50588e-06	2.24866e-06	3.37739e-06	8.51824e-06												1.05487	1.27272	1.23753	1.16179	1.30163	3.19828	1.59993	1.06576	1.05858		1.74248	1.74088	1.37718	1.49218
	6.78363e-07	7.87957e-07	5.61762e-07	0.000299125	2.19978e-06	7.44498e-06	3.86652e-06	2.4534e-06	0.000319164	0.000198369	1.74467e-06	1.59243e-06	2.20307e-06	3.30052e-06	8.26644e-06												1.0822	1.30991	1.24044	1.10419	1.24186	3.0978	1.48451	1.09016	1.0726		1.85231	1.84095	1.34926	1.45822
	6.80067e-07	7.83359e-07	5.91073e-07	0.000323802	2.26105e-06	7.22009e-06	4.19145e-06	3.01224e-06	0.000320639	0.000197839	1.45322e-06	1.53018e-06	2.43734e-06	3.36362e-06	8.09267e-06												1.08492	1.30227	1.30517	1.19528	1.27644	3.00422	1.60926	1.33847	1.07755		1.54288	1.76898	1.49274	1.48609
	7.41921e-07	7.97183e-07	5.69464e-07	0.000299937	2.25559e-06	6.409e-06	3.83298e-06	2.66486e-06	0.000316968	0.000196988	1.68187e-06	1.54101e-06	2.25482e-06	3.18629e-06	7.67052e-06												1.1836	1.32525	1.25745	1.10719	1.27336	2.66674	1.47163	1.18412	1.06522		1.78563	1.7815	1.38095	1.40775
																											1.10987	1.31226	1.26428	1.14289	1.28836	3.04493	1.53637	1.17992	1.07945		1.72003	1.74651	1.42427	1.4747

## Sheet: ACSF-2
	211011-1	211011-2	211011-3	211011-4	211018-4	211027-3	220117-2	220117-4	220118-3	220118-4	220126	220127				N=7											5.7024e-07	5.70745e-07	8.05072e-07	7.90699e-07	1.97523e-06	0.000158534	0.000126396	1.84454e-06	2.9567e-05	3.08569e-05	2.71012e-06	3.2034e-06	#DIV/0!
	5.95483e-07	5.88367e-07	8.39731e-07	8.2033e-07	1.9217e-06	0.000143706	0.000121148	2.12876e-06	2.74745e-05	2.81806e-05	2.82773e-06	3.2335e-06				n=12											1.04427	1.03087	1.04305	1.03747	0.972897	0.906464	0.958477	1.15409	0.929228	0.913266	1.0434	1.0094
	5.64413e-07	5.68503e-07	8.83845e-07	8.26636e-07	2.01857e-06	0.00016266	0.000125246	2.06039e-06	3.23191e-05	3.30093e-05	2.87416e-06	3.29809e-06															0.989782	0.996072	1.09785	1.04545	1.02194	1.02603	0.9909	1.11702	1.09308	1.06975	1.06053	1.02956		CCK
	5.5214e-07	5.69722e-07	7.58926e-07	8.15572e-07	1.94759e-06	0.000145302	0.000126989	2.09477e-06	2.90703e-05	3.3693e-05	2.86037e-06	3.22572e-06															0.968259	0.998207	0.942681	1.03146	0.986007	0.916537	1.00469	1.13566	0.983199	1.09191	1.05544	1.00697		CCK
	5.96684e-07	5.87366e-07	7.41799e-07	8.00792e-07	2.03659e-06	0.00016005	0.00012565	1.93462e-06	3.07083e-05	2.79492e-05	2.58466e-06	3.08865e-06															1.04637	1.02912	0.921407	1.01276	1.03106	1.00956	0.994094	1.04884	1.0386	0.905767	0.953708	0.964178		CCK
	5.09074e-07	5.45468e-07	7.45063e-07	7.47794e-07	2.10758e-06	0.000168941	0.000127494	1.79135e-06	3.19424e-05	3.20592e-05	2.86807e-06	3.12809e-06															0.892737	0.955711	0.925461	0.945738	1.06701	1.06565	1.00869	0.971163	1.08034	1.03896	1.05828	0.976489		CCK
	5.8109e-07	5.57695e-07	8.79989e-07	7.37974e-07	1.99415e-06	0.000145643	0.000130731	1.61103e-06	2.91479e-05	3.33116e-05	2.44487e-06	3.16636e-06															1.01903	0.977135	1.09306	0.933318	1.00958	0.918683	1.0343	0.873407	0.985824	1.07955	0.902127	0.988436		CCK
	6.07582e-07	5.75987e-07	8.27299e-07	7.6351e-07	1.88646e-06	0.000172064	0.000126113	1.53352e-06	2.73904e-05	3.03661e-05	2.59669e-06	3.30052e-06															1.06548	1.00918	1.02761	0.965614	0.955058	1.08534	0.997763	0.831386	0.926385	0.984095	0.958147	1.03032		CCK
	5.55454e-07	5.72854e-07	7.63924e-07	8.12982e-07	1.88921e-06	0.000169908	0.000127798	1.60187e-06	2.84832e-05	2.82864e-05	2.6244e-06	3.18629e-06															0.974071	1.0037	0.948889	1.02818	0.956449	1.07174	1.01109	0.86844	0.963345	0.916695	0.968371	0.99466		CCK
																																								CCK
																											0.999538	0.994969	0.983284	0.977124	1.00383	1.03019	1.00919	0.918647	0.998899	0.985014	0.968127	0.990816		CCK
																																								CCK
	5.96781e-07	7.06459e-07	7.64067e-07	8.26794e-07			0.000106598	2.00487e-06	3.29507e-05	4.50935e-05	2.46638e-06																1.04654	1.23778	0.949067	1.04565			0.843364	1.08692	1.11444	1.46137	0.910062			CCK
	6.63427e-07	7.11309e-07	8.59163e-07	7.96818e-07			0.000113839	2.07097e-06	3.28092e-05	3.50905e-05	2.50047e-06																1.16342	1.24628	1.06719	1.00774			0.900649	1.12276	1.10966	1.1372	0.922644			CCK
	6.8719e-07	7.19068e-07	8.1947e-07	7.77923e-07			0.000116557	2.02729e-06	3.37956e-05	4.17177e-05	2.64513e-06																1.20509	1.25988	1.01788	0.983842			0.922159	1.09908	1.14302	1.35197	0.976021			CCK
	6.58141e-07	7.0595e-07	8.33868e-07	8.61348e-07			0.000121283	1.89183e-06	3.6497e-05	3.61776e-05	2.50133e-06																1.15415	1.23689	1.03577	1.08935			0.959548	1.02564	1.23438	1.17243	0.92296			CCK
	6.24936e-07	6.89073e-07	8.40611e-07	7.8908e-07			0.000119383	1.88174e-06	3.62641e-05	3.72266e-05	2.36626e-06																1.09592	1.20732	1.04414	0.997953			0.944516	1.02017	1.22651	1.20643	0.873121
	5.90167e-07	6.91187e-07	7.9794e-07	8.37009e-07			0.000138521	2.3214e-06	2.80643e-05	3.85894e-05	2.27951e-06																1.03495	1.21103	0.991141	1.05857			1.09593	1.25853	0.949175	1.25059	0.84111
	5.86669e-07	6.65146e-07	8.25214e-07	8.5821e-07			0.000137776	2.32868e-06	3.08311e-05	3.91085e-05	2.74428e-06																1.02881	1.1654	1.02502	1.08538			1.09003	1.26247	1.04275	1.26741	1.01261
	6.14456e-07	6.12192e-07	8.45392e-07	7.06707e-07			0.000145394	2.40464e-06	3.54383e-05	2.90424e-05	2.57168e-06																1.07754	1.07262	1.05008	0.893775			1.15031	1.30365	1.19858	0.941195	0.948918
	6.08406e-07	6.55782e-07	7.71018e-07	8.9313e-07			0.000118901	2.40734e-06	2.85365e-05	4.22092e-05	2.63169e-06																1.06693	1.14899	0.9577	1.12955			0.940703	1.30512	0.965146	1.3679	0.97106
	6.83782e-07	6.74787e-07	7.92137e-07	8.73066e-07			0.000116485	2.4926e-06	3.23064e-05	3.2072e-05	2.59e-06																1.19911	1.18229	0.983933	1.10417			0.921589	1.35134	1.09265	1.03938	0.955678
	6.6774e-07	6.64731e-07	8.75335e-07	7.64537e-07			0.000125857	2.12399e-06	3.20455e-05	3.54734e-05	2.47331e-06																1.17098	1.16467	1.08728	0.966913			0.995738	1.1515	1.08383	1.14961	0.912618
	6.58738e-07	6.21658e-07	8.81814e-07	8.51373e-07			0.00013229	1.95969e-06	3.18097e-05	4.16443e-05	2.85952e-06																1.15519	1.0892	1.09532	1.07674			1.04663	1.06243	1.07585	1.34959	1.05513
	5.82865e-07	6.42282e-07	8.52253e-07	8.56536e-07			0.000123372	2.28768e-06	2.76525e-05	2.92164e-05	2.52534e-06	2.88656e-06															1.02214	1.12534	1.0586	1.08326			0.976075	1.24025	0.93525	0.946836	0.931819	0.901092
	6.15015e-07	6.86268e-07	8.51895e-07	7.50154e-07			0.00012251	2.32887e-06	3.14996e-05	3.19113e-05	2.70604e-06	3.07882e-06															1.07852	1.20241	1.05816	0.948722			0.969254	1.26257	1.06536	1.03417	0.998494	0.96111
	6.72211e-07	6.60675e-07	8.52306e-07	7.97343e-07			0.000130806	2.27409e-06	3.05169e-05	3.2586e-05	2.63313e-06	3.00866e-06															1.17882	1.15757	1.05867	1.0084			1.03489	1.23288	1.03213	1.05604	0.971591	0.939209
	5.92049e-07	6.23364e-07	8.92451e-07	7.97147e-07	2.23227e-06		0.000135409	2.17851e-06	3.05423e-05	3.22978e-05	2.75862e-06	2.95597e-06															1.03825	1.09219	1.10854	1.00815	1.13013		1.07131	1.18106	1.03298	1.0467	1.0179	0.922759
	6.35308e-07	6.14855e-07	8.54873e-07	8.49494e-07	2.32443e-06	0.000159816	0.000125165	2.44397e-06	3.1414e-05	3.35328e-05	2.81552e-06	3.4343e-06															1.11411	1.07728	1.06186	1.07436	1.17679	1.00808	0.990263	1.32498	1.06247	1.08672	1.03889	1.07208
	6.16299e-07	6.16827e-07	8.44459e-07	7.57376e-07	2.35648e-06	0.000189305	0.000124514	2.32812e-06	3.21122e-05	3.39059e-05	2.4978e-06	3.17588e-06															1.08077	1.08074	1.04892	0.957857	1.19302	1.1941	0.985106	1.26217	1.08608	1.09881	0.921657	0.991409
	5.79781e-07	5.8956e-07	8.36682e-07	8.03092e-07	2.32961e-06	0.000192761	0.000115976	2.21569e-06	2.9505e-05	2.98323e-05	2.54231e-06	3.30219e-06															1.01673	1.03297	1.03926	1.01567	1.17941	1.2159	0.917564	1.20122	0.997903	0.966794	0.938079	1.03084
	6.08017e-07	6.23986e-07	8.21733e-07	8.44804e-07	2.44356e-06	0.000180471	0.000126304	2.1081e-06	3.31172e-05	3.28657e-05	2.66917e-06	3.22035e-06															1.06625	1.09328	1.0207	1.06843	1.2371	1.13838	0.999273	1.14289	1.12007	1.0651	0.984891	1.00529
	5.94709e-07	6.06255e-07	8.83298e-07	7.75025e-07	2.42167e-06	0.000179415	0.00012538	1.99686e-06	3.0356e-05	3.43677e-05	2.85751e-06	2.89586e-06															1.04291	1.06222	1.09717	0.980177	1.22602	1.13171	0.991959	1.08258	1.02668	1.11378	1.05439	0.903995
	6.21046e-07	5.94031e-07	8.809e-07	7.52483e-07	2.22491e-06	0.000174715	0.00012028	2.14184e-06	3.20433e-05	3.98189e-05	2.52264e-06	3.08276e-06															1.0891	1.0408	1.09419	0.951669	1.12641	1.10207	0.951609	1.16118	1.08375	1.29044	0.930822	0.962339
	6.18624e-07	6.21367e-07	8.76065e-07	8.08355e-07	2.28823e-06	0.000168812	0.000129493	2.01846e-06	2.76664e-05	3.17095e-05	2.49835e-06	3.31349e-06															1.08485	1.08869	1.08818	1.02233	1.15846	1.06483	1.0245	1.09429	0.935719	1.02763	0.92186	1.03437
	6.58409e-07	6.07131e-07	8.48716e-07	8.17371e-07	2.24836e-06	0.000163215	0.000131546	2.17859e-06	3.28549e-05	3.19688e-05	2.50993e-06	3.15774e-06															1.15462	1.06375	1.05421	1.03373	1.13828	1.02953	1.04075	1.1811	1.1112	1.03603	0.926132	0.985745
	6.25197e-07	6.04796e-07	7.75342e-07	8.05068e-07	2.01938e-06	0.000151372	0.000120899	2.15984e-06	2.83757e-05	3.08125e-05	2.49658e-06	2.93161e-06															1.09637	1.05966	0.963071	1.01817	1.02235	0.954825	0.956506	1.17094	0.959708	0.99856	0.921206	0.915154
	5.94041e-07	6.01111e-07	8.28221e-07	7.27885e-07	2.3132e-06	0.000160972	0.000128681	2.14521e-06	3.15333e-05	3.53579e-05	2.49377e-06	3.16681e-06															1.04174	1.0532	1.02875	0.920559	1.1711	1.01538	1.01808	1.163	1.0665	1.14587	0.920168	0.988577
	5.95968e-07	6.1723e-07	8.08815e-07	7.23165e-07	2.18026e-06	0.000144611	0.000132872	2.03543e-06	3.01602e-05	3.57461e-05	2.64238e-06	3.08578e-06															1.04512	1.08145	1.00465	0.91459	1.1038	0.912177	1.05124	1.10349	1.02006	1.15845	0.975003	0.963281
	6.51785e-07	6.62607e-07	8.30486e-07	8.47024e-07	2.16039e-06	0.000135876	0.000120086	2.04017e-06	3.22343e-05	3.45687e-05	2.12592e-06	3.10374e-06															1.143	1.16095	1.03157	1.07124	1.09374	0.85708	0.950079	1.10606	1.09021	1.12029	0.784436	0.968889
	6.47348e-07	6.35635e-07	8.15764e-07	8.69299e-07	2.28914e-06	0.000152717	0.000119701	2.11401e-06	3.1692e-05	3.16369e-05	2.52527e-06	3.00501e-06															1.13522	1.11369	1.01328	1.09941	1.15892	0.963304	0.947028	1.14609	1.07187	1.02528	0.931791	0.93807
	6.23306e-07	6.44661e-07	8.64193e-07	7.64279e-07	1.98144e-06	0.000134403	0.000110639	2.09027e-06	3.08373e-05	3.32072e-05	2.64027e-06	3.17773e-06															1.09306	1.12951	1.07344	0.966587	1.00314	0.847787	0.875338	1.13322	1.04296	1.07617	0.974227	0.991986
																											1.09163	1.10776	1.03034	0.994475	1.10614	0.919145	0.968351	1.13037	1.05832	1.10521	0.917125	0.970161
