# Supplementary material for: Cholecystokinin modulates age-dependent thalamocortical neuroplasticity
Source: eLife journal article supplement (doi:10.7554/elife.101513), 2024-10-14
Supplement: data1 [file Developmental thalamocortical LTP.xlsx]

## Sheet: P20
	200626-1-2	200627-1	200703-1_No.1	200703-1_No.2	200713_1	200713_2	200714_1	200714_2	200724_2_No.1	200724_3_No.2	200724_4_No.2	200729_1	200729_2	200730_1	200730_2				n=15 N=10								1.54215e-06	1.01429e-06	8.08185e-07	1.47435e-06	5.70012e-06	3.47812e-06	1.12623e-06	1.67715e-06	3.24557e-06	1.71713e-06	7.0811e-06	0.000169904	1.87147e-06	3.32915e-06	0.000308946
	1.61584e-06	1.03567e-06	7.93247e-07	1.33508e-06	5.66348e-06	3.38641e-06	1.04911e-06	1.82021e-06	3.14493e-06	1.81342e-06	7.13447e-06	0.000174608	1.83893e-06	3.52001e-06	0.000322455												1.04778	1.02108	0.981516	0.905542	0.993573	0.973633	0.931521	1.0853	0.968992	1.05608	1.00754	1.02769	0.98261	1.05733	1.04373
	1.56456e-06	1.06879e-06	7.36036e-07	1.50786e-06	5.78829e-06	3.61061e-06	1.19313e-06	1.60738e-06	3.49971e-06	1.70939e-06	7.30905e-06	0.000169889	1.95746e-06	2.78647e-06	0.000285284												1.01453	1.05373	0.910727	1.02273	1.01547	1.03809	1.0594	0.958397	1.0783	0.995494	1.03219	0.99991	1.04594	0.836993	0.923412
	1.42213e-06	1.01759e-06	6.61239e-07	1.67055e-06	5.64544e-06	3.40564e-06	1.11003e-06	1.69997e-06	3.24022e-06	1.76511e-06	6.73035e-06	0.000176186	2.05922e-06	3.29915e-06	0.000306429												0.922171	1.00326	0.818178	1.13307	0.990407	0.979163	0.985611	1.0136	0.998353	1.02794	0.950467	1.03697	1.10032	0.990989	0.991855
	1.39762e-06	8.18574e-07	9.32603e-07	1.28482e-06	5.79491e-06	3.55959e-06	1.12576e-06	1.54648e-06	3.16e-06	1.67784e-06	7.76697e-06	0.000157809	1.59699e-06	3.08587e-06	0.000313655												0.906277	0.807041	1.15395	0.87145	1.01663	1.02343	0.999581	0.922088	0.973634	0.977117	1.09686	0.928814	0.853334	0.926925	1.01524
	1.47815e-06	1.20374e-06	7.76592e-07	1.70393e-06	5.72586e-06	3.64959e-06	1.12387e-06	1.86691e-06	3.23039e-06	1.73652e-06	6.66777e-06	0.000166586	1.87621e-06	3.18982e-06	0.000288581												0.9585	1.18678	0.960909	1.15572	1.00452	1.0493	0.997898	1.11315	0.995324	1.01129	0.94163	0.980467	1.00253	0.958147	0.934084
	1.60213e-06	9.81345e-07	9.09698e-07	1.32886e-06	5.60031e-06	3.41677e-06	1.03451e-06	1.73196e-06	3.33366e-06	1.85955e-06	7.37839e-06	0.00017906	2.00572e-06	3.8519e-06	0.00032628												1.0389	0.967519	1.12561	0.901323	0.982491	0.982362	0.918556	1.03268	1.02714	1.08294	1.04198	1.05389	1.07173	1.15702	1.05611
	1.65711e-06	1.03338e-06	8.36561e-07	1.483e-06	5.60981e-06	3.49706e-06	1.11104e-06	1.43725e-06	3.10155e-06	1.49313e-06	6.9098e-06	0.000166754	1.90466e-06	3.46151e-06	0.000301749												1.07455	1.01882	1.03511	1.00587	0.984158	1.00545	0.986505	0.856958	0.955625	0.869551	0.97581	0.981458	1.01773	1.03976	0.976706
	1.59967e-06	9.55239e-07	8.19506e-07	1.48067e-06	5.77282e-06	3.29925e-06	1.26242e-06	1.70706e-06	3.25409e-06	1.68208e-06	6.75197e-06	0.000168342	1.7326e-06	3.43846e-06	0.000327131												1.0373	0.94178	1.01401	1.00429	1.01276	0.948575	1.12092	1.01783	1.00263	0.979587	0.953521	0.990806	0.925793	1.03284	1.05886
																																											16		P20	8w	18m
																											1.0031	0.984388	1.05792	0.98773	1.00011	1.00182	1.00469	0.98854	0.99087	0.984097	1.00196	0.987086	0.974225	1.02294	1.0082		16		P20	8w	18m
																																											16		P20	8w	18m
	6.36828e-07	2.16598e-07	4.23781e-07	1.60837e-06	5.34422e-06	3.63705e-06	1.00741e-06	1.68415e-06	2.57976e-06	1.59863e-06	4.85686e-06	0.000128812	1.58569e-06	2.72113e-06	0.000277566															1.09091	0.937563	1.04569	0.894494	1.00417	0.794855	0.93099	0.685891	0.758145	0.847292	0.817364	0.89843		16		P20	8w	18m
	8.54903e-07	6.46593e-07	7.4596e-07	1.62222e-06	5.42155e-06	3.32841e-06	1.1335e-06	1.44443e-06	3.28836e-06	1.45168e-06	6.04767e-06	0.000142629	1.59503e-06	3.36975e-06	0.000291553													0.637483	0.923007	1.1003	0.951129	0.956957	1.00645	0.86124	1.01319	0.845412	0.854059	0.839465	0.852284	1.0122	0.943704		16		P20	8w	18m
	6.96906e-07	1.02242e-06	7.89005e-07	1.63941e-06	5.76937e-06	3.21321e-06	1.1202e-06	1.80848e-06	3.15477e-06	1.32236e-06	5.47654e-06	0.000134711	1.59162e-06	3.14365e-06	0.000284776													1.00801	0.976267	1.11196	1.01215	0.923836	0.994647	1.0783	0.972023	0.7701	0.773403	0.792865	0.850463	0.94428	0.921769		17		P20	8w	18m
	4.06901e-07	1.16893e-06	7.1383e-07	1.20595e-06	5.91782e-06	3.21887e-06	1.3067e-06	1.51866e-06	3.3653e-06	1.38284e-06	6.11476e-06	0.000145409	1.74318e-06	3.04327e-06	0.000282476													1.15246	0.88325	0.817955	1.03819	0.925464	1.16024	0.905499	1.03689	0.805321	0.863533	0.855827	0.931448	0.914128	0.914325		17		P20	8w	18m
	4.73985e-07	1.24925e-06	6.31408e-07	1.46669e-06	6.05438e-06	3.55551e-06	1.12789e-06	1.57129e-06	3.53341e-06	1.3429e-06	7.05483e-06	0.000132754	1.61392e-06	3.0257e-06	0.000313889													1.23165	0.781266	0.994804	1.06215	1.02225	1.00147	0.93688	1.08869	0.782062	0.99629	0.781344	0.862381	0.908852	1.016		17		P20	8w	18m
	6.58998e-07	7.53018e-07	9.75517e-07	1.46143e-06	5.66451e-06	3.69835e-06	9.40339e-07	1.55536e-06	3.27062e-06	1.28961e-06	7.17044e-06	0.000134268	1.72268e-06	3.75212e-06	0.00031889													0.742409	1.20705	0.991235	0.993753	1.06332	0.834942	0.92738	1.00772	0.751024	1.01262	0.790259	0.920492	1.12705	1.03219		17		P20	8w	18m
	1.11562e-06	1.16954e-06	7.59828e-07	1.06845e-06	5.691e-06	3.1321e-06	1.26618e-06	1.48804e-06	3.32664e-06	1.44605e-06	7.16727e-06	0.000136266	1.52398e-06	3.58305e-06	0.000328755													1.15307	0.940166	0.724693	0.9984	0.900517	1.12426	0.887244	1.02498	0.842134	1.01217	0.802018	0.81432	1.07626	1.06412		17		P20	8w	18m
	8.28579e-07	9.19747e-07	6.04196e-07	1.2013e-06	5.41462e-06	3.37685e-06	1.12165e-06	1.88388e-06	3.25282e-06	1.57488e-06	6.71523e-06	0.000152714	1.80687e-06	3.42254e-06	0.000320744													0.906788	0.747595	0.814804	0.949914	0.970886	0.995927	1.12326	1.00223	0.917161	0.948332	0.898825	0.965478	1.02805	1.03819		18		P20	8w	18m
	9.57662e-07	7.67497e-07	8.87085e-07	1.519e-06	5.54121e-06	3.56582e-06	1.0413e-06	1.54896e-06	3.39148e-06	1.38463e-06	6.10389e-06	0.000140512	1.97389e-06	3.42563e-06	0.000341271													0.756684	1.09763	1.03029	0.972123	1.02522	0.92459	0.923562	1.04496	0.806361	0.861998	0.827007	1.05473	1.02898	1.10463		18		P20	8w	18m
	1.16252e-06	1.08412e-06	9.08054e-07	1.38429e-06	5.25512e-06	3.28443e-06	1.24629e-06	1.77287e-06	3.07796e-06	1.35532e-06	6.69583e-06	0.000144241	1.55086e-06	3.64211e-06	0.000310348													1.06885	1.12357	0.938915	0.921933	0.944314	1.1066	1.05707	0.948356	0.789295	0.945592	0.848958	0.828681	1.09401	1.00454		18		P20	8w	18m
	6.04421e-07	7.92388e-07	5.74233e-07	1.54541e-06	5.36093e-06	3.5643e-06	1.11998e-06	1.85234e-06	3.21003e-06	1.28732e-06	7.03937e-06	0.000160488	1.67077e-06	3.0905e-06	0.0003311													0.781224	0.710522	1.0482	0.940495	1.02478	0.994452	1.10446	0.989049	0.749696	0.994108	0.94458	0.892755	0.928315	1.07171		18		P20	8w	18m
	1.43479e-06	8.20859e-07	1.07969e-06	1.24171e-06	5.52081e-06	3.62813e-06	1.11005e-06	1.55657e-06	3.3172e-06	1.37322e-06	6.50104e-06	0.000149089	1.69142e-06	3.35499e-06	0.000330406												0.930383	0.809294	1.33595	0.842211	0.968544	1.04313	0.985635	0.928102	1.02207	0.799721	0.918084	0.877491	0.90379	1.00776	1.06946		18		P20	8w	18m
	1.49364e-06	1.10889e-06	1.07953e-06	1.70419e-06	5.63033e-06	3.62331e-06	1.16571e-06	1.51363e-06	3.31249e-06	1.52164e-06	6.43851e-06	0.000162729	1.67697e-06	3.0303e-06	0.000330197												0.968542	1.09326	1.33574	1.15589	0.987758	1.04174	1.03505	0.902499	1.02062	0.886151	0.909253	0.957769	0.896069	0.910232	1.06879		19		P20	8w	18m
	1.74579e-06	1.00563e-06	8.03586e-07	1.28046e-06	5.55835e-06	3.42353e-06	1.24359e-06	1.50472e-06	3.19281e-06	1.454e-06	6.17235e-06	0.000151325	1.71377e-06	2.80459e-06	0.000327979												1.13205	0.991464	0.994309	0.868492	0.97513	0.984305	1.1042	0.897184	0.983746	0.846761	0.871667	0.890646	0.915734	0.842436	1.06161		19		P20	8w	18m
	1.67674e-06	1.32338e-06	7.83533e-07	1.47067e-06	5.57968e-06	4.03885e-06	1.15428e-06	1.66706e-06	3.33285e-06	1.59869e-06	6.60778e-06	0.000152761	1.66371e-06	3.34331e-06	0.000297688												1.08728	1.30474	0.969497	0.997504	0.978871	1.16122	1.0249	0.993985	1.02689	0.931024	0.933157	0.899102	0.888985	1.00425	0.963562		19		P20	8w	18m
	1.61518e-06	1.32462e-06	7.7617e-07	1.48041e-06	5.50769e-06	3.49502e-06	1.21999e-06	1.5656e-06	3.14249e-06	1.44218e-06	6.22125e-06	0.000152584	1.82374e-06	3.17097e-06	0.000316052												1.04735	1.30596	0.960386	1.00411	0.966242	1.00486	1.08325	0.933485	0.968239	0.83988	0.878571	0.898057	0.974494	0.952487	1.023		19		P20	8w	18m
	1.26981e-06	1.02058e-06	1.0214e-06	1.72118e-06	5.36658e-06	3.64013e-06	1.18227e-06	1.65877e-06	3.19641e-06	1.46836e-06	6.36521e-06	0.000156449	1.56982e-06	3.37736e-06	0.000311668												0.823401	1.00621	1.26382	1.16742	0.941486	1.04658	1.04976	0.989039	0.984854	0.855123	0.898902	0.920804	0.838817	1.01448	1.00881		19		P20	8w	18m
	2.08017e-06	9.47359e-07	6.86006e-07	1.33814e-06	5.92371e-06	3.45358e-06	1.3342e-06	1.60589e-06	3.61482e-06	1.51389e-06	6.93824e-06	0.000157115	1.88241e-06	3.35824e-06	0.000312484												1.34888	0.934011	0.848823	0.907612	1.03923	0.992945	1.18466	0.957508	1.11377	0.881638	0.979825	0.92473	1.00584	1.00874	1.01145		20		P20	8w	18m
	1.5371e-06	1.44837e-06	9.61023e-07	1.64835e-06	5.60374e-06	3.38113e-06	1.08357e-06	1.74483e-06	3.65772e-06	1.49557e-06	6.25789e-06	0.00016642	1.71488e-06	3.41649e-06	0.000302004												0.996726	1.42797	1.18911	1.11802	0.983092	0.972116	0.962117	1.04036	1.12699	0.870973	0.883746	0.979496	0.916325	1.02623	0.977533		20		P20	8w	18m
	2.02753e-06	1.18576e-06	8.11087e-07	1.93103e-06	5.80094e-06	3.46913e-06	1.07932e-06	1.73226e-06	3.26656e-06	1.25901e-06	6.34999e-06	0.000154068	1.88867e-06	3.06387e-06	0.0003308												1.31474	1.16906	1.00359	1.30975	1.01769	0.997416	0.958346	1.03286	1.00647	0.733208	0.896752	0.906792	1.00919	0.920316	1.07074		20		P20	8w	18m
	2.09497e-06	1.26755e-06	7.32034e-07	1.95536e-06	5.48155e-06	3.30225e-06	1.30109e-06	1.56018e-06	3.29314e-06	1.37099e-06	6.63078e-06	0.00016684	2.07395e-06	3.32094e-06	0.000289206												1.35847	1.24969	0.905775	1.32626	0.961657	0.949437	1.15526	0.930253	1.01466	0.798422	0.936406	0.981967	1.10819	0.997533	0.936105		20		P20	8w	18m
	1.84932e-06	1.51098e-06	6.69716e-07	1.23532e-06	5.27643e-06	3.40409e-06	1.20273e-06	1.68007e-06	3.224e-06	1.35886e-06	6.33829e-06	0.000169877	2.10016e-06	3.74555e-06	0.000317833												1.19918	1.48969	0.828666	0.837873	0.925671	0.978718	1.06793	1.00174	0.993354	0.791357	0.8951	0.999841	1.1222	1.12508	1.02877		20		P20	8w	18m
	1.88443e-06	8.35047e-07	1.04358e-06	1.34158e-06	5.7352e-06	3.67976e-06	9.71438e-07	1.53829e-06	3.59442e-06	1.52855e-06	6.47748e-06	0.000163238	1.9531e-06	2.97083e-06	0.000331536												1.22195	0.823282	1.29126	0.909948	1.00616	1.05798	0.862555	0.917205	1.10749	0.890176	0.914757	0.960768	1.04362	0.892369	1.07312		21		P20	8w	18m
	1.8744e-06	1.00212e-06	9.99236e-07	1.25211e-06	5.5887e-06	3.62805e-06	1.27014e-06	1.62157e-06	3.48207e-06	1.54236e-06	6.65965e-06	0.000157378	1.96705e-06	3.272e-06	0.000309986												1.21544	0.988006	1.2364	0.849264	0.980453	1.04311	1.12778	0.966859	1.07287	0.898219	0.940484	0.926273	1.05107	0.982833	1.00337		21		P20	8w	18m
	2.07601e-06	1.48383e-06	7.7099e-07	1.47174e-06	5.29316e-06	3.37735e-06	1.12406e-06	1.64122e-06	3.42054e-06	1.38392e-06	6.0622e-06	0.000166482	1.58948e-06	3.07737e-06	0.000301461												1.34618	1.46292	0.953976	0.998228	0.928605	0.97103	0.998073	0.978573	1.05391	0.805948	0.85611	0.979859	0.84932	0.924371	0.975775		21		P20	8w	18m
	2.34255e-06	1.18212e-06	1.04784e-06	1.76778e-06	5.29714e-06	3.53377e-06	1.14551e-06	1.76036e-06	3.17204e-06	1.46922e-06	6.87111e-06	0.000166299	1.83516e-06	3.14391e-06	0.000321197												1.51901	1.16547	1.29653	1.19903	0.929304	1.016	1.01712	1.04961	0.977343	0.855628	0.970345	0.978781	0.980598	0.944359	1.03966		21		P20	8w	18m
	2.16106e-06	9.3165e-07	8.90112e-07	1.37503e-06	5.41499e-06	3.73212e-06	1.09616e-06	1.69607e-06	3.09527e-06	1.34493e-06	6.53614e-06	0.000151365	1.64213e-06	3.12181e-06	0.000313432												1.40133	0.918524	1.10137	0.932633	0.949979	1.07303	0.9733	1.01128	0.953692	0.783244	0.92304	0.890886	0.877454	0.93772	1.01452		21		P20	8w	18m
	2.05692e-06	1.3304e-06	7.87011e-07	1.37971e-06	5.96119e-06	3.19703e-06	1.03206e-06	1.78412e-06	3.66477e-06	1.42953e-06	6.44318e-06	0.000175098	2.11021e-06	3.60942e-06	0.000306385												1.3338	1.31166	0.973801	0.935809	1.0458	0.919185	0.916383	1.06378	1.12916	0.832511	0.909913	1.03057	1.12757	1.08419	0.991714		22		P20	8w	18m
	1.50427e-06	8.92731e-07	8.91203e-07	1.49541e-06	5.34131e-06	3.44878e-06	1.21612e-06	1.68752e-06	3.48933e-06	1.42277e-06	6.3991e-06	0.00017077	1.74393e-06	3.63197e-06	0.000304124												0.975435	0.880153	1.10272	1.01428	0.937053	0.991566	1.07981	1.00618	1.07511	0.828573	0.903688	1.00509	0.931849	1.09096	0.984395		22		P20	8w	18m
	1.95302e-06	1.22318e-06	9.5446e-07	1.5523e-06	5.6654e-06	3.78851e-06	1.14592e-06	1.62413e-06	2.95986e-06	1.38811e-06	6.51275e-06	0.000163085	1.99111e-06	3.35119e-06	0.00033219												1.26643	1.20595	1.18099	1.05287	0.993909	1.08924	1.01748	0.968384	0.911969	0.808388	0.919738	0.959866	1.06393	1.00662	1.07524		22		P20	8w	18m
																																											22		P20	8w	18m
																											1.2992	1.09635	1.13108	1.02693	0.971209	1.0178	1.00082	1.01985	1.00945	0.821669	0.925345	0.973039	0.996278	1.01277	1.02111		22		P20	8w	18m
																																											23		P20	8w	18m
																																											23		P20	8w	18m
																																											23		P20	8w	18m
																																											23		P20	8w	18m
																																											23		P20	8w	18m
																																											24		P20	8w	18m
																																											24		P20	8w	18m
																																											24		P20	8w	18m
																																											24		P20	8w	18m
																																											24		P20	8w	18m
																																											25		P20	8w	18m
																																											25		P20	8w	18m
																																											25
																																											25
																																											25
																																											26
																																											26
																																											26
																																											26
																																											26
																																											27
																																											27
																																											27
																																											27
																																											27
																																											28
																																											28
																																											28
																																											28
																																											28
																																											29
																																											29
																																											29
																																											29
																																											29
																																											30
																																											30
																																											30
																																											30
																																											30
																																									15	16	31
																																									15	16	31
																																									15	16	31
																																									15	16	31
																																									15	16	31
																																									15	17	32
																																									15	17	32
																																									15	17	32
																																									15	17	32
																																									15	17	32
																																									15	18	33
																																									15	18	33
																																									15	18	33
																																									15	18	33
																																									15	18	33
																																									15	19	34
																																									15	19	34
																																									15	19	34
																																									15	19	34
																																									15	19	34
																																									15	20	35
																																									15	20	35
																																									15	20	35
																																									15	20	35
																																									15	20	35
																																									15	21	36
																																									15	21	36
																																									15	21	36
																																									15	21	36
																																									15	21	36
																																									15	22	37
																																									15	22	37
																																									15	22	37
																																									15	22	37
																																									15	22	37
																																									15	23	38
																																									15	23	38
																																									15	23	38
																																									15	23	38
																																									15	23	38
																																									15	24	39
																																									15	24	39
																																									15	24	39
																																									15	24	39
																																									15	24	39
																																									15	25	40
																																									15	25	40
																																									15	25	40
																																									15	25	40
																																									15	25	40
																																									15	26	41
																																									15	26	41
																																									15	26	41
																																									15	26	41
																																									15	26	41
																																									15	27	42
																																									15	27	42
																																									15	27	42
																																									15	27	42
																																									15	27	42
																																									15	28	43
																																									15	28	43
																																									15	28	43
																																									15	28	43
																																									15	28	43
																																									15	29	44
																																									15	29	44
																																									15	29	44
																																									15	29	44
																																									15	29	44
																																									15	30	45
																																									15	30	45
																																									15	30	45
																																									15	30	45
																																									15	30	45

## Sheet: P53
	200805_1	200807_1	200904-1	200904-2	201016-1	201016-2	201016-3	201023_1	210129-3		201203-3	201211_4	201212_4	200130-2													0.000340903	3.50326e-06	7.89456e-05	3.35723e-05	2.96624e-06	0.000947737	1.01776e-05	1.23043e-06	0.000103762		4.52548e-06	7.44927e-05	1.38189e-06	0.000128412
	0.000333269	3.82558e-06	7.31354e-05	2.992e-05	2.86716e-06	0.000916416	1.00222e-05	1.20497e-06	0.000108306		4.51279e-06	6.90743e-05	1.27492e-06	0.000129971													0.977606	1.09201	0.926402	0.89121	0.966597	0.966952	0.98473	0.979309	1.04379		0.997196	0.927263	0.922588	1.01214
	0.000314826	3.32745e-06	8.43207e-05	2.99537e-05	3.05078e-06	0.000938936	1.0197e-05	1.252e-06	0.000100064		4.33882e-06	8.00201e-05	1.51721e-06	0.000123932													0.923505	0.949814	1.06809	0.892215	1.0285	0.990714	1.00191	1.01753	0.964363		0.958754	1.0742	1.09792	0.965109
	0.000324861	3.43625e-06	7.52088e-05	3.5348e-05	2.86395e-06	0.000986685	1.05639e-05	1.25002e-06	9.61703e-05		4.99171e-06	7.24149e-05	1.37282e-06	0.000119024													0.952941	0.980872	0.952667	1.05289	0.965513	1.0411	1.03796	1.01592	0.926834		1.10302	0.972108	0.993433	0.926887
	0.00035356	3.73568e-06	7.29928e-05	3.73925e-05	2.83089e-06	0.000940387	1.01313e-05	1.2478e-06	9.9938e-05		4.19061e-06	7.79094e-05	1.50806e-06	0.000127901													1.03713	1.06634	0.924596	1.11379	0.954367	0.992245	0.995446	1.01412	0.963144		0.926003	1.04587	1.0913	0.996021
	0.00034437	3.91493e-06	8.14215e-05	2.77571e-05	2.97179e-06	0.000928761	1.01329e-05	1.24241e-06	0.00010887		4.98538e-06	7.33572e-05	1.40912e-06	0.000129953													1.01017	1.11751	1.03136	0.826787	1.00187	0.979978	0.995607	1.00974	1.04923		1.10162	0.984757	1.0197	1.012
	0.000345351	3.22881e-06	8.4406e-05	3.68123e-05	3.18124e-06	0.000945585	1.04572e-05	1.20114e-06	0.000104878		4.31287e-06	7.46568e-05	1.31069e-06	0.000136149													1.01305	0.921658	1.06917	1.09651	1.07248	0.99773	1.02747	0.976199	1.01075		0.953019	1.0022	0.948476	1.06025
	0.000358522	3.22314e-06	8.37941e-05	3.94636e-05	3.10912e-06	0.000964618	9.74764e-06	1.29393e-06	0.000100024		4.38478e-06	7.79667e-05	1.49361e-06	0.000121926													1.05168	0.92004	1.06142	1.17548	1.04817	1.01781	0.957754	1.05161	0.963975		0.968909	1.04664	1.08084	0.949487
	0.000352468	3.33425e-06	7.62852e-05	3.19312e-05	2.85503e-06	0.000960507	1.01687e-05	1.15116e-06	0.000111847		4.48689e-06	7.05419e-05	1.16872e-06	0.000138443													1.03392	0.951756	0.966301	0.951117	0.962506	1.01347	0.999125	0.935574	1.07791		0.991473	0.946964	0.845735	1.07811
																											1.02919	0.995461	1.01057	1.03274	1.00788	1.00025	0.995081	0.997447	1.013		0.988206	1.00529	0.997212	1.01917
		4.33915e-06	8.30148e-05	5.32851e-05	3.9587e-06	0.0011062	1.20828e-05	1.65708e-06	0.000134642		6.79838e-06	0.000125224	2.2886e-06	0.000140241														1.2386	1.05154	1.58717	1.33458	1.16721	1.1872	1.34675	1.2976		1.50224	1.68102	1.65613	1.09211
		4.12686e-06	9.03992e-05	5.45386e-05	3.40506e-06	0.00112807	1.1859e-05	1.64282e-06	0.000132259		6.90245e-06	0.000113926	1.92491e-06	0.000143512														1.178	1.14508	1.62451	1.14794	1.19028	1.1652	1.33516	1.27464		1.52524	1.52935	1.39295	1.11759
		4.0762e-06	9.98988e-05	5.10885e-05	3.31498e-06	0.00107902	1.12851e-05	1.68011e-06	0.000128569		6.27882e-06	9.61676e-05	1.56344e-06	0.000156014														1.16354	1.26541	1.52174	1.11757	1.13853	1.10882	1.36546	1.23908		1.38744	1.29097	1.13137	1.21495
		4.04162e-06	8.86955e-05	5.71294e-05	3.26097e-06	0.00107851	1.1666e-05	1.70234e-06	0.000138092		6.42323e-06	8.06361e-05	1.91044e-06	0.000164049														1.15367	1.1235	1.70168	1.09936	1.13798	1.14624	1.38353	1.33085		1.41935	1.08247	1.38248	1.27752
		4.0264e-06	8.95935e-05	5.51742e-05	3.89069e-06	0.00107158	1.12461e-05	1.82337e-06	0.000128401		6.548e-06	8.42843e-05	1.66703e-06	0.000150461														1.14933	1.13488	1.64344	1.31165	1.13067	1.10498	1.4819	1.23746		1.44692	1.13144	1.20634	1.17171
		4.33998e-06	8.20981e-05	4.46134e-05	4.01048e-06	0.00108171	1.15554e-05	1.67028e-06	0.00012654		5.82407e-06	9.48017e-05	1.681e-06	0.000144385														1.23884	1.03993	1.32887	1.35204	1.14136	1.13537	1.35748	1.21952		1.28695	1.27263	1.21645	1.12439
		4.07336e-06	8.29621e-05	5.09637e-05	3.67456e-06	0.000999097	1.21741e-05	1.80765e-06	0.000126724		6.26692e-06	8.80507e-05	1.66166e-06	0.000144211														1.16273	1.05088	1.51803	1.23879	1.05419	1.19616	1.46912	1.22129		1.38481	1.18201	1.20245	1.12303
		4.27715e-06	8.48806e-05	4.45372e-05	3.40589e-06	0.00101192	1.15657e-05	1.78885e-06	0.000125413		6.27377e-06	8.37458e-05	1.54652e-06	0.000153041														1.22091	1.07518	1.32661	1.14822	1.06772	1.13639	1.45384	1.20866		1.38632	1.12422	1.11914	1.19179
	0.000606542	4.63357e-06	9.74123e-05	5.27712e-05	3.48628e-06	0.00100933	1.15686e-05	1.61334e-06	0.000129272		7.20257e-06	8.11702e-05	1.5844e-06	0.000160124													1.77922	1.32264	1.23392	1.57187	1.17532	1.06499	1.13668	1.3112	1.24585		1.59156	1.08964	1.14654	1.24695
	0.000535397	4.10643e-06	8.86142e-05	5.68135e-05	3.71807e-06	0.00104823	1.14914e-05	1.88038e-06	0.000119877		5.96213e-06	9.43431e-05	1.81492e-06	0.000139599													1.57053	1.17217	1.12247	1.69227	1.25346	1.10604	1.12909	1.52823	1.1553		1.31746	1.26648	1.31336	1.08711
	0.000532768	4.77397e-06	9.38931e-05	5.30005e-05	3.29422e-06	0.00110645	1.15095e-05	1.73194e-06	0.000122847		6.1252e-06	8.29405e-05	1.46114e-06	0.000171017													1.56281	1.36272	1.18934	1.5787	1.11057	1.16747	1.13086	1.40759	1.18393		1.35349	1.1134	1.05734	1.33178
	0.000505629	4.28697e-06	9.38511e-05	5.37733e-05	3.23969e-06	0.00104777	1.17211e-05	1.86355e-06	0.000122606		6.63597e-06	8.63493e-05	1.60182e-06	0.000161618													1.4832	1.22371	1.18881	1.60172	1.09219	1.10555	1.15166	1.51455	1.1816		1.46636	1.15917	1.15915	1.25859
	0.000427127	4.46352e-06	9.52841e-05	5.43071e-05	3.22587e-06	0.00109264	1.2352e-05	2.12423e-06	0.000128204		5.86008e-06	8.7439e-05	2.04304e-06	0.00014969													1.25293	1.2741	1.20696	1.61762	1.08753	1.1529	1.21364	1.72641	1.23556		1.29491	1.17379	1.47844	1.1657
	0.000475313	4.35931e-06	8.86563e-05	5.82113e-05	3.48216e-06	0.00114672	1.25148e-05	2.00534e-06	0.000121405		7.01145e-06	9.73981e-05	1.4829e-06	0.000159522													1.39427	1.24436	1.12301	1.73391	1.17393	1.20996	1.22964	1.62979	1.17003		1.54933	1.30749	1.0731	1.24227
	0.000435994	4.28536e-06	9.21757e-05	4.95872e-05	3.35435e-06	0.00118584	1.20458e-05	2.15629e-06	0.000113402		6.46735e-06	9.02818e-05	1.9789e-06	0.000155892													1.27894	1.22325	1.16759	1.47703	1.13084	1.25123	1.18356	1.75247	1.0929		1.4291	1.21196	1.43202	1.214
	0.000429343	4.49894e-06	8.84416e-05	4.88424e-05	3.31196e-06	0.00115993	1.30202e-05	1.97001e-06	0.000113555		5.69777e-06	8.95097e-05	1.60997e-06	0.000173871													1.25943	1.28421	1.12029	1.45484	1.11655	1.22389	1.2793	1.60107	1.09437		1.25904	1.20159	1.16505	1.354
	0.000413756	4.49549e-06	8.21032e-05	4.61485e-05	3.64076e-06	0.00112678	1.27088e-05	1.7909e-06	0.000120901		6.92812e-06	9.47748e-05	1.74672e-06	0.000168892													1.21371	1.28323	1.04	1.3746	1.2274	1.18892	1.2487	1.45551	1.16518		1.53091	1.27227	1.26401	1.31523
	0.000462962	4.26891e-06	0.000100594	6.05264e-05	3.46023e-06	0.00111566	1.15605e-05	2.00716e-06	0.000122339		6.86167e-06	8.96708e-05	1.84297e-06	0.000172937													1.35804	1.21855	1.27422	1.80287	1.16653	1.17718	1.13588	1.63127	1.17903		1.51623	1.20375	1.33366	1.34673
	0.000396469	4.5104e-06	9.93772e-05	5.88001e-05	3.60174e-06	0.0011423	1.16117e-05	2.03459e-06	0.000126979		6.50632e-06	9.15488e-05	1.60757e-06	0.000168833													1.163	1.28748	1.25881	1.75145	1.21424	1.20529	1.1409	1.65356	1.22375		1.43771	1.22896	1.16331	1.31478
	0.000451896	4.11372e-06	9.47175e-05	5.42876e-05	3.22514e-06	0.00110261	1.19419e-05	2.07213e-06	0.000117645		6.00083e-06	9.42009e-05	1.82117e-06	0.000168673													1.32558	1.17425	1.19978	1.61704	1.08728	1.16341	1.17335	1.68407	1.13379		1.32601	1.26457	1.31788	1.31353
	0.000429761	4.95921e-06	9.35512e-05	4.83437e-05	3.26507e-06	0.00103674	1.27601e-05	1.88049e-06	0.00011982		6.7817e-06	7.81699e-05	1.62084e-06	0.000169288													1.26065	1.4156	1.18501	1.43999	1.10074	1.09391	1.25374	1.52832	1.15476		1.49856	1.04936	1.17291	1.31832
	0.000427704	4.12345e-06	8.80395e-05	4.88845e-05	3.37469e-06	0.00104494	1.26964e-05	2.06659e-06	0.0001267		7.21754e-06	8.34074e-05	1.58179e-06	0.000175841													1.25462	1.17703	1.11519	1.4561	1.1377	1.10256	1.24748	1.67957	1.22106		1.59487	1.11967	1.14466	1.36935
	0.000405719	4.31571e-06	9.50143e-05	4.76602e-05	3.56216e-06	0.00103166	1.22521e-05	1.75841e-06	0.000134981		7.7851e-06	0.000101768	1.45149e-06	0.000181406													1.19013	1.23191	1.20354	1.41963	1.2009	1.08855	1.20383	1.4291	1.30087		1.72028	1.36614	1.05037	1.41268
	0.000435281	4.28135e-06	8.06911e-05	4.63316e-05	3.27805e-06	0.00102682	1.24376e-05	1.91203e-06	0.000132426		6.06405e-06	9.23468e-05	1.94301e-06	0.000172925													1.27685	1.2221	1.02211	1.38005	1.10512	1.08344	1.22205	1.55396	1.27625		1.33998	1.23968	1.40605	1.34664
	0.000400112	4.37628e-06	9.13089e-05	4.94395e-05	3.66587e-06	0.00106113	1.19155e-05	1.8439e-06	0.000124642		6.93963e-06	9.72181e-05	1.48704e-06	0.000176246													1.17368	1.2492	1.15661	1.47263	1.23586	1.11964	1.17076	1.49858	1.20123		1.53346	1.30507	1.07609	1.3725
	0.000404415	4.55987e-06	8.04824e-05	4.57637e-05	3.34844e-06	0.00103805	1.22667e-05	1.86088e-06	0.000126084		6.34873e-06	9.15397e-05	1.49216e-06	0.00017297													1.1863	1.30161	1.01947	1.36314	1.12885	1.09529	1.20527	1.51239	1.21512		1.40289	1.22884	1.07979	1.34699
	0.000417228	4.51835e-06	9.28019e-05	5.41904e-05	3.82384e-06	0.00106961	1.31327e-05	2.08995e-06	0.000128708		7.27934e-06	9.67798e-05	1.52752e-06	0.000175141													1.22389	1.28975	1.17552	1.61414	1.28912	1.12859	1.29035	1.69855	1.24041		1.60852	1.29919	1.10538	1.3639
	0.000384195	4.48789e-06	0.000100525	5.51963e-05	3.90182e-06	0.0011133	1.23624e-05	1.96666e-06	0.000129555		6.6185e-06	0.00010251	1.62286e-06	0.000176522													1.12699	1.28106	1.27334	1.6441	1.31541	1.1747	1.21467	1.59835	1.24858		1.4625	1.37611	1.17438	1.37465
	0.00039835	4.3732e-06	8.65927e-05	6.00655e-05	3.57207e-06	0.00113613	1.31971e-05	2.22112e-06	0.000137362		6.50951e-06	9.14925e-05	1.44747e-06	0.000178685													1.16851	1.24832	1.09687	1.78914	1.20424	1.19878	1.29668	1.80516	1.32381		1.43841	1.22821	1.04745	1.3915
	0.000369619	4.46626e-06	8.49539e-05	4.81821e-05	3.51323e-06	0.00107681	1.31178e-05	1.96714e-06	0.000125253		7.82023e-06	9.2133e-05	1.89492e-06	0.000179318													1.08423	1.27489	1.07611	1.43517	1.1844	1.13619	1.28889	1.59874	1.20711		1.72804	1.23681	1.37125	1.39642
																											1.15799	1.27913	1.12826	1.56914	1.2244	1.14671	1.25917	1.64264	1.24701		1.52807	1.27383	1.15565	1.37469

## Sheet: 18m
	210225-1	210225-2	210225-3	210226_1	210227_1	210227_2	210227_3	210301_1	210302_1	210302_2	210303_1	20210511_1	20210517_1	20210517-2													0.000130512	1.00219e-06	3.76651e-05	8.99343e-07	2.46882e-05	4.35557e-05	1.46976e-06	4.67087e-07	2.11092e-07	4.71329e-05	2.82372e-06	8.09691e-06	2.92485e-05	5.68197e-05
	0.00012305	9.50279e-07	3.41679e-05	9.08604e-07	2.4521e-05	4.16479e-05	1.46282e-06	5.02645e-07	2.35223e-07	4.67553e-05	2.9137e-06	9.35982e-06	2.9407e-05	6.08712e-05													0.942823	0.948201	0.907152	1.0103	0.993228	0.956198	0.995284	1.07613	1.11432	0.991989	1.03187	1.15597	1.00542	1.0713
	0.000128653	9.70758e-07	3.83946e-05	9.02895e-07	2.10306e-05	4.57166e-05	1.52642e-06	5.08849e-07	2.00302e-07	4.5368e-05	2.73128e-06	7.29908e-06	2.91675e-05	5.49917e-05													0.98576	0.968636	1.01937	1.00395	0.851848	1.04961	1.03855	1.08941	0.948885	0.962554	0.967263	0.901465	0.99723
	0.00013305	1.08921e-06	3.94659e-05	9.21001e-07	2.57622e-05	4.24781e-05	1.42026e-06	4.64858e-07	2.09435e-07	4.44902e-05	2.7473e-06	8.52025e-06	2.74435e-05	5.64729e-05													1.01945	1.08683	1.04781	1.02408	1.04351	0.975259	0.966322	0.995228	0.992152	0.94393	0.972937	1.05228	0.938287
	0.000133015	1.09592e-06	3.72365e-05	8.9184e-07	2.51331e-05	3.99468e-05	1.45262e-06	4.49807e-07	2.31351e-07	4.51786e-05	2.86558e-06	7.55589e-06	3.15436e-05	5.97234e-05													1.01918	1.09352	0.988623	0.991657	1.01802	0.917142	0.988338	0.963005	1.09597	0.958535	1.01483	0.933182	1.07847
	0.000129039	9.69339e-07	3.58515e-05	8.77725e-07	2.4394e-05	4.74946e-05	1.46596e-06	4.25307e-07	1.95355e-07	4.92883e-05	2.63497e-06	6.04439e-06	2.89111e-05	5.25547e-05													0.988713	0.96722	0.951851	0.975962	0.988085	1.09043	0.997419	0.910552	0.925451	1.04573	0.933158	0.746506	0.988462
	0.000128878	9.43753e-07	3.90099e-05	8.76858e-07	2.70583e-05	4.63391e-05	1.50735e-06	4.51445e-07	2.06305e-07	4.8878e-05	2.71105e-06	8.52861e-06	2.92264e-05	5.68884e-05													0.987479	0.94169	1.0357	0.974999	1.096	1.0639	1.02558	0.966511	0.977326	1.03702	0.9601	1.05332	0.999244
	0.000136456	1.03715e-06	3.59779e-05	9.39249e-07	2.53893e-05	4.09076e-05	1.46021e-06	4.58989e-07	1.80653e-07	4.90895e-05	3.0117e-06	8.86275e-06	2.92423e-05	5.88774e-05													1.04554	1.03488	0.955206	1.04437	1.0284	0.9392	0.993505	0.982663	0.855804	1.04151	1.06657	1.09458	0.999788
	0.000131955	9.61123e-07	4.12163e-05	8.76573e-07	2.42168e-05	4.39151e-05	1.46241e-06	4.74796e-07	2.30109e-07	4.80157e-05	2.97415e-06	8.60447e-06	2.90469e-05	5.41781e-05													1.01106	0.959022	1.09429	0.974681	0.980908	1.00825	0.995001	1.0165	1.09009	1.01873	1.05327	1.06269	0.993105
																											0	0	0	0	0	0	0	0	0	0	0	0	0
																											0	0	0	0	0	0	0	0	0	0	0	0	0
																											0	0	0	0	0	0	0	0	0	0	0	0	0
	0.000145506	1.1388e-06	4.55943e-05	9.33547e-07	3.03715e-05	4.40702e-05	1.61575e-06	4.10898e-07	2.30109e-07	3.88302e-05	2.85904e-06	7.36145e-06	3.35439e-05	6.63235e-05													1.11489	1.13631	1.21052	1.03803	1.23021	1.01181	1.09933	0.879703	1.09009	0.823844	1.01251	0.909167	1.14686
	0.000158887	1.19351e-06	3.8653e-05	8.9587e-07	2.97649e-05	4.01332e-05	1.60286e-06	4.60149e-07	1.78952e-07	4.20356e-05	2.6444e-06	1.06572e-05	3.3039e-05	6.76798e-05													1.21742	1.1909	1.02623	0.996139	1.20563	0.921423	1.09056	0.985146	0.847747	0.891852	0.936497	1.3162	1.12959
	0.000162007	1.05291e-06	4.5771e-05	9.15479e-07	3.0365e-05	3.88606e-05	1.64549e-06	4.20354e-07	1.98973e-07	4.32972e-05	2.79951e-06	9.02773e-06	3.4951e-05	6.58806e-05													1.24132	1.05061	1.21521	1.01794	1.22994	0.892203	1.11957	0.899948	0.942591	0.918619	0.991426	1.11496	1.19497
	0.000172234	9.41061e-07	4.9024e-05	8.89559e-07	2.84536e-05	4.19647e-05	1.63388e-06	4.13151e-07	1.75904e-07	4.41559e-05	2.72593e-06	1.10543e-05	3.1119e-05	5.87625e-05													1.31968	0.939003	1.30158	0.98912	1.15252	0.963472	1.11167	0.884526	0.833306	0.936837	0.965371	1.36525	1.06395
	0.000170955	8.95539e-07	4.43097e-05	8.43647e-07	2.43683e-05	4.7714e-05	1.58026e-06	3.9875e-07	1.92549e-07	4.95974e-05	2.83803e-06	1.02447e-05	3.25211e-05	6.7074e-05													1.30988	0.893581	1.17641	0.938071	0.987045	1.09547	1.07519	0.853695	0.91216	1.05229	1.00507	1.26526	1.11189
	0.000168646	1.12362e-06	5.32006e-05	8.60617e-07	2.73723e-05	4.61006e-05	1.49369e-06	4.76299e-07	1.96913e-07	4.64422e-05	2.90523e-06	9.57368e-06	3.45333e-05	6.67095e-05													1.29219	1.12116		0.956939	1.10872	1.05843	1.01629	1.01972	0.932832	0.985345	1.02887	1.18239	1.18068
	0.000169083	9.46621e-07	5.03595e-05	7.97532e-07	2.64469e-05	4.58241e-05	1.52628e-06	4.72933e-07	2.21596e-07	4.80375e-05	2.78373e-06	1.06929e-05	3.49948e-05	6.5936e-05													1.29553	0.944552		0.886794	1.07124	1.05208	1.03846	1.01252	1.04976	1.01919	0.985839	1.32062	1.19646
	0.000152236	1.09652e-06	4.03935e-05	8.45575e-07	2.37133e-05	3.8492e-05	1.58305e-06	4.2954e-07	1.75415e-07	4.43808e-05	2.81843e-06	1.02667e-05	3.27171e-05	7.90334e-05													1.16645	1.09412	1.07244	0.940214	0.960511	0.883741	1.07708	0.919614	0.830991	0.941609	0.998128	1.26797	1.11859
	0.000165813	1.09025e-06	3.91739e-05	7.9751e-07	2.74302e-05	3.55835e-05	1.55831e-06	4.00763e-07	1.99964e-07	4.91017e-05	2.71417e-06	8.23604e-06	3.65882e-05	6.97979e-05													1.27048	1.08787	1.04006	0.88677	1.11107	0.816965	1.06025	0.858006	0.947287	1.04177	0.961204	1.01718	1.25094
	0.00015555	1.01131e-06	5.06357e-05	8.11429e-07	2.59504e-05	3.90353e-05	1.50538e-06	4.28384e-07	2.27346e-07	4.8077e-05	2.53934e-06	9.16237e-06	3.3649e-05	6.6218e-05													1.19185	1.0091	1.34437	0.902247	1.05113	0.896215	1.02424	0.917139	1.077	1.02003	0.89929	1.13159	1.15045
	0.000163962	9.56596e-07	4.59845e-05	8.02827e-07	2.59815e-05	4.84268e-05	1.56699e-06	4.07454e-07	2.06505e-07	4.99663e-05	2.61096e-06	7.34546e-06	3.16513e-05	6.55879e-05													1.2563	0.954504	1.22088	0.892682	1.05239	1.11184	1.06615	0.872329	0.978274	1.06011	0.924653	0.907194	1.08215
	0.000165662	9.45986e-07	4.57376e-05	7.51359e-07	2.4944e-05	4.37045e-05	1.5066e-06	4.355e-07	1.91254e-07	4.78356e-05	2.56709e-06	9.8629e-06	3.50368e-05	6.75268e-05													1.26932	0.943918	1.21432	0.835453	1.01036	1.00341	1.02507	0.932374	0.906026	1.01491	0.909117	1.21811	1.1979
	0.000168447	9.10525e-07	5.14959e-05	7.4226e-07	2.65472e-05	4.02578e-05	1.45896e-06	3.67522e-07	1.96665e-07	4.52935e-05	2.64933e-06	1.01131e-05	3.45042e-05	6.78102e-05													1.29067	0.908535	1.36721	0.825336	1.0753	0.924283	0.992654	0.786839	0.93166	0.960973	0.938243	1.24901	1.17969
	0.000156835	1.01768e-06	4.40991e-05	7.35075e-07	2.39532e-05	4.39398e-05	1.40991e-06	4.08953e-07	2.37186e-07	4.75206e-05	2.61405e-06	7.70471e-06	3.51505e-05	7.11598e-05													1.2017	1.01545	1.17082	0.817347	0.970231	1.00882	0.959278	0.87554	1.12362	1.00822	0.925747	0.951561	1.20179
	0.000158525	1.01476e-06	4.21951e-05	8.21325e-07	2.50462e-05	4.14029e-05	1.38655e-06	4.07657e-07	1.98464e-07	4.72342e-05	2.77673e-06	8.93893e-06	3.64597e-05	7.52445e-05													1.21464	1.01254	1.12027	0.913249	1.0145	0.950572	0.943391	0.872765	0.940182	1.00215	0.98336	1.10399	1.24655
	0.000158391	9.70815e-07	5.36004e-05	7.56067e-07	2.37102e-05	3.60307e-05	1.53575e-06	4.02209e-07	1.74045e-07	4.9352e-05	2.52438e-06	6.69196e-06	3.62989e-05	7.40863e-05													1.21361	0.968692	1.42308	0.840689	0.960386	0.827232	1.0449	0.861102	0.824498	1.04708	0.893991	0.826483	1.24105
	0.00015112	9.94605e-07	4.98368e-05	6.80675e-07	2.12912e-05	3.68972e-05	1.53584e-06	4.06823e-07	1.74264e-07	5.16171e-05	2.52753e-06	8.74293e-06	3.58064e-05	7.6258e-05													1.1579	0.992431	1.32316	0.756858	0.862404	0.847125	1.04496	0.87098	0.825539	1.09514	0.895107	1.07979	1.22421
	0.000159675	1.11428e-06	4.6869e-05	6.92427e-07	2.39716e-05	4.10593e-05	1.45519e-06	3.85058e-07	1.83853e-07	4.69919e-05	2.4681e-06	1.03185e-05	3.35401e-05														1.22345	1.11184		0.769926	0.970974	0.942685	0.990087	0.824382	0.870961	0.997008	0.874062	1.27438	1.14673
	0.000159911	1.01761e-06	4.7e-05	7.28247e-07	2.26547e-05	3.54437e-05	1.6257e-06	3.96176e-07	1.58176e-07	4.67997e-05	2.72009e-06	6.61114e-06	3.14786e-05														1.22526	1.01538	1.24436	0.809754	0.917635	0.813754	1.1061	0.848184	0.749323	0.992929	0.9633	0.816502	1.07625
	0.000144164	9.63918e-07	4.19599e-05	7.87375e-07	2.35409e-05	3.71446e-05	1.42988e-06	3.89411e-07	1.8268e-07	5.02833e-05	2.60057e-06	6.54901e-06	2.96503e-05														1.10461	0.961811	1.24784	0.8755	0.95353	0.852807	0.972866	0.833701	0.865405	1.06684	0.920975	0.808828	1.01373
	0.000154128	1.05609e-06	4.54128e-05	7.50136e-07	2.27388e-05	4.70348e-05	1.47528e-06	3.87914e-07	1.942e-07	4.82972e-05	2.53764e-06	9.09129e-06	3.20112e-05														1.18095	1.05378	1.11403	0.834093	0.921041	1.07988	1.00376	0.830496	0.91998	1.0247	0.898687	1.12281	1.09445
	0.000160081	9.98983e-07	3.9435e-05	7.54537e-07	2.27766e-05	4.17469e-05	1.46171e-06	3.87708e-07	2.21366e-07	4.69942e-05	2.68182e-06	8.97902e-06	3.21646e-05														1.22657	0.996799	1.2057	0.838987	0.922572	0.958471	0.994527	0.830056	1.04867	0.997057	0.949748	1.10894	1.0997
	0.000159518	1.01664e-06	4.54749e-05	7.39724e-07	2.25137e-05	4.29451e-05	1.60105e-06	3.79921e-07	2.11982e-07	4.88104e-05	2.54084e-06	8.37646e-06	3.32041e-05														1.22225	1.01441	1.04699	0.822516	0.911922	0.985981	1.08933	0.813385	1.00422	1.03559	0.899821	1.03453	1.13524
	0.000160089	9.52224e-07	4.41082e-05	6.55431e-07	2.42807e-05	4.00639e-05	1.53473e-06	3.56381e-07	1.74961e-07	4.68911e-05	2.73775e-06	6.22231e-06	3.2947e-05														1.22662	0.950143	1.20735	0.728789	0.983493	0.919831	1.0442	0.762986	0.828841	0.99487	0.969556	0.76848	1.12645
	0.000157288	1.09709e-06	3.97639e-05	7.48481e-07	2.24566e-05	4.03098e-05	1.51082e-06	3.30902e-07	2.2753e-07	4.84678e-05	2.58171e-06	9.90838e-06	3.34741e-05														1.20517	1.09469	1.17106	0.832253	0.909608	0.925476	1.02794	0.708438	1.07787	1.02832	0.914295	1.22372	1.14447
	0.00016817	1.01411e-06	5.10963e-05	7.16267e-07	2.34801e-05	4.42952e-05	1.52566e-06	3.39209e-07	2.41242e-07	5.0104e-05	2.57205e-06	1.03962e-05	3.41204e-05														1.28854	1.01189	1.05572	0.796434	0.951067	1.01698	1.03803	0.726222	1.14283	1.06303	0.910875	1.28397	1.16657
	0.000158899	9.90589e-07	4.24186e-05	7.07329e-07	2.54279e-05	3.88654e-05	1.54674e-06	3.66075e-07	1.93947e-07	5.24383e-05	2.45988e-06	7.42682e-06	3.43612e-05														1.21751	0.988423	1.12621	0.786496	1.02996	0.892314	1.05238	0.783741	0.918782	1.11256	0.87115	0.917241	1.1748
	0.000157007	1.02888e-06	4.71075e-05	6.90145e-07	2.44369e-05	4.2922e-05	1.53498e-06	3.54301e-07	1.57213e-07	4.71357e-05	2.63695e-06	7.57315e-06	3.38855e-05														1.20301	1.02663	1.25069	0.767388	0.989824	0.985451	1.04437	0.758533	0.744764	1.00006	0.933858	0.935313	1.15854
	0.000149591	1.01744e-06	5.26264e-05	6.74586e-07	2.15227e-05	3.96793e-05	1.50858e-06	3.90915e-07	2.05451e-07	4.79098e-05	2.69896e-06	8.3844e-06	3.13711e-05														1.14619	1.01521	1.39722	0.750087	0.871783	0.911	1.02642	0.836922	0.97328	1.01648	0.955819	1.03551	1.07257
	0.000168168	9.65912e-07	4.02668e-05	6.61901e-07	2.54658e-05	3.90008e-05	1.50586e-06	3.69527e-07	1.73428e-07	4.92855e-05	2.64638e-06	7.92997e-06	3.46294e-05														1.28853	0.9638	1.06907	0.735983	1.0315	0.895423	1.02456	0.791131	0.821577	1.04567	0.937198	0.979382	1.18397

## Sheet: 18m-2
	20210511_1	20210517_1	20210517-2	20210225-1-1	20210225-1-3	20210225-2-2	20210225-2-3	20210225-3	20210226-1	20210227-1-3	20210227-1-4	20210227-2	20210227-3	20210301-1	20210302-1	20210302-2	20210303-1-3	20210303-1-1		n=18 N=8							8.09691e-06	2.92485e-05	5.68197e-05	0.000130512	4.81277e-05	9.46417e-07	5.07132e-07	1.10296e-06	8.99343e-07	2.4887e-05	1.31147e-05	4.33537e-05	1.46976e-06	4.66793e-07	2.11092e-07	4.71329e-05	2.82372e-06	3.08982e-07
	9.35982e-06	2.9407e-05	6.08712e-05	0.00012305	4.6701e-05	9.50279e-07	4.58602e-07	1.08114e-06	9.08604e-07	2.26209e-05	1.21188e-05	4.00316e-05	1.46282e-06	5.06495e-07	2.35223e-07	4.67553e-05	2.9137e-06	3.10773e-07									1.15597	1.00542	1.0713	0.942823	0.970356	1.00408	0.904304	0.980213	1.0103	0.908944	0.924061	0.923372	0.995284	1.08505	1.11432	0.991989	1.03187	1.00579
	7.29908e-06	2.91675e-05	5.49917e-05	0.000128653	4.47114e-05	9.70758e-07	4.68299e-07	1.16007e-06	9.02895e-07	2.4521e-05	1.41785e-05	4.57166e-05	1.52642e-06	5.02645e-07	2.00302e-07	4.5368e-05	2.73128e-06	3.18254e-07									0.901465	0.99723	0.967827	0.98576	0.929017	1.02572	0.923426	1.05178	1.00395	0.985294	1.08112	1.0545	1.03855	1.07681	0.948885	0.962554	0.967263	1.03001
	8.52025e-06	2.74435e-05	5.64729e-05	0.00013305	4.6243e-05	9.69339e-07	4.87881e-07	1.07593e-06	9.21001e-07	2.57622e-05	1.11247e-05	4.24781e-05	1.42026e-06	4.64858e-07	2.09435e-07	4.44902e-05	2.7473e-06	2.93652e-07									1.05228	0.938287	0.993896	1.01945	0.960841	1.02422	0.962039	0.975489	1.02408	1.03517	0.848262	0.979804	0.966322	0.995856	0.992152	0.94393	0.972937	0.950383
	7.55589e-06	3.15436e-05	5.97234e-05	0.000133015	4.79288e-05	9.36501e-07	5.62979e-07	1.16449e-06	8.9184e-07	2.51331e-05	1.47086e-05	3.99468e-05	1.45262e-06	4.49807e-07	2.31351e-07	4.51786e-05	2.86558e-06	2.8266e-07									0.933182	1.07847	1.0511	1.01918	0.995868	0.989523	1.11012	1.05579	0.991657	1.00989	1.12154	0.921416	0.988338	0.963612	1.09597	0.958535	1.01483	0.914811
	6.04439e-06	2.89111e-05	5.25547e-05	0.000129039	5.52275e-05	9.16858e-07	5.59095e-07	1.126e-06	8.77725e-07	2.4394e-05	1.47157e-05	4.74946e-05	1.46596e-06	4.25307e-07	1.95355e-07	4.92883e-05	2.63497e-06	3.35685e-07									0.746506	0.988462	0.924938	0.988713	1.14752	0.968768	1.10246	1.02088	0.975962	0.980193	1.12207	1.09552	0.997419	0.911126	0.925451	1.04573	0.933158	1.08642
	8.52861e-06	2.92264e-05	5.68884e-05	0.000128878	4.7191e-05	9.22723e-07	5.13972e-07	1.11397e-06	8.76858e-07	2.70583e-05	1.23207e-05	4.63391e-05	1.50735e-06	4.51445e-07	2.06305e-07	4.8878e-05	2.71105e-06	2.72095e-07									1.05332	0.999244	1.00121	0.987479	0.980538	0.974965	1.01349	1.00998	0.974999	1.08725	0.939453	1.06886	1.02558	0.967121	0.977326	1.03702	0.9601	0.880616
	8.86275e-06	2.92423e-05	5.88774e-05	0.000136456	4.87203e-05	9.43753e-07	4.26926e-07	1.02039e-06	9.39249e-07	2.53893e-05	1.29508e-05	4.09076e-05	1.46021e-06	4.58989e-07	1.80653e-07	4.90895e-05	3.0117e-06	3.23379e-07									1.09458	0.999788	1.03621	1.04554	1.01231	0.997185	0.841844	0.92514	1.04437	1.02018	0.987504	0.943577	0.993505	0.983283	0.855804	1.04151	1.06657	1.04659
	8.60447e-06	2.90469e-05	5.41781e-05	0.000131955	4.82984e-05	9.61123e-07	5.79303e-07	1.08171e-06	8.76573e-07	2.42168e-05	1.27999e-05	4.39151e-05	1.46241e-06	4.74796e-07	2.30109e-07	4.80157e-05	2.97415e-06	3.35362e-07									1.06269	0.993105	0.953509	1.01106	1.00355	1.01554	1.14231	0.980729	0.974681	0.973072	0.975997	1.01295	0.995001	1.01715	1.09009	1.01873	1.05327	1.08537
																											0.978055	1.01181	0.993395	1.01039	1.02796	0.989196	1.04205	0.998504	0.992334	1.01412	1.02931	1.00846	0.999969	0.968457	0.988929	1.02031	1.00559	1.00276
	7.36145e-06	3.35439e-05		0.000176519	5.10018e-05	1.1388e-06	6.4573e-07	1.0239e-06	9.33547e-07	2.84536e-05	1.55396e-05	4.40702e-05	1.61575e-06	4.10898e-07	2.30109e-07	3.88302e-05	2.85904e-06	3.07885e-07									0.909167	1.14686		1.35252	1.05972	1.20327	1.2733	0.928315	1.03803	1.14331	1.1849	1.01653	1.09933	0.880258	1.09009	0.823844	1.01251	0.996448
	1.06572e-05	3.3039e-05		0.000172234	5.58246e-05	1.19351e-06	6.46335e-07	9.45525e-07	8.9587e-07	2.43683e-05	1.5378e-05	4.01332e-05	1.60286e-06	4.60149e-07	1.78952e-07	4.20356e-05	2.6444e-06	3.17237e-07									1.3162	1.12959		1.31968	1.15993	1.26108	1.27449	0.85726	0.996139	0.979161	1.17257	0.925717	1.09056	0.985767	0.847747	0.891852	0.936497	1.02672
	9.02773e-06	3.4951e-05		0.000170955	6.20514e-05	1.05291e-06	6.43247e-07	1.16068e-06	9.15479e-07	2.73723e-05	1.56603e-05	3.88606e-05	1.64549e-06	4.20354e-07	1.98973e-07	4.32972e-05	2.79951e-06	3.82017e-07									1.11496	1.19497		1.30988	1.28931	1.11252	1.2684	1.05233	1.01794	1.09986	1.1941	0.896361	1.11957	0.900515	0.942591	0.918619	0.991426	1.23637
	1.10543e-05	3.1119e-05		0.000168646	6.09889e-05	9.41061e-07	6.04363e-07	1.1792e-06	8.89559e-07	2.64469e-05	1.32253e-05	4.19647e-05	1.63388e-06	4.13151e-07	1.75904e-07	4.41559e-05	2.72593e-06	3.3495e-07									1.36525	1.06395		1.29219	1.26723	0.994341	1.19173	1.06913	0.98912	1.06268	1.00843	0.967962	1.11167	0.885084	0.833306	0.936837	0.965371	1.08404
	1.02447e-05	3.25211e-05		0.000169083	5.73029e-05	8.95539e-07	5.82302e-07	1.03641e-06	8.43647e-07	2.37133e-05	1.67801e-05	4.7714e-05	1.58026e-06	3.9875e-07	1.92549e-07	4.95974e-05	2.83803e-06	2.96319e-07									1.26526	1.11189		1.29553	1.19064	0.946241	1.14823	0.939664	0.938071	0.952839	1.27949	1.10057	1.07519	0.854233	0.91216	1.05229	1.00507	0.959016
	9.57368e-06	3.45333e-05		0.000152236	5.90972e-05	1.12362e-06	6.25304e-07	1.04517e-06	8.60617e-07	2.74302e-05	1.35643e-05	4.61006e-05	1.49369e-06	4.76299e-07	1.96913e-07	4.64422e-05	2.90523e-06	2.98875e-07									1.18239	1.18068		1.16645	1.22793	1.18724	1.23302	0.9476	0.956939	1.10219	1.03428	1.06336	1.01629	1.02036	0.932832	0.985345	1.02887	0.967289
	1.06929e-05	3.49948e-05		0.000165813	5.96497e-05	9.46621e-07	6.29115e-07	1.18326e-06	7.97532e-07	2.59504e-05	1.22944e-05	4.58241e-05	1.52628e-06	4.72933e-07	2.21596e-07	4.80375e-05	2.78373e-06	3.52885e-07									1.32062	1.19646		1.27048	1.23941	1.00022	1.24053	1.0728	0.886794	1.04273	0.937448	1.05698	1.03846	1.01315	1.04976	1.01919	0.985839	1.14209
	1.02667e-05	3.27171e-05		0.00015555	5.63802e-05	1.09652e-06	6.95502e-07	1.06537e-06	8.45575e-07	2.59815e-05	1.40268e-05	3.8492e-05	1.58305e-06	4.2954e-07	1.75415e-07	4.43808e-05	2.81843e-06	2.97205e-07									1.26797	1.11859		1.19185	1.17147	1.1586	1.37144	0.965916	0.940214	1.04398	1.06955	0.88786	1.07708	0.920194	0.830991	0.941609	0.998128	0.961884
	8.23604e-06	3.65882e-05		0.000163962	5.34855e-05	1.09025e-06	6.60113e-07	1.02626e-06	7.9751e-07	2.4944e-05	1.32846e-05	3.55835e-05	1.55831e-06	4.00763e-07	1.99964e-07	4.91017e-05	2.71417e-06	3.78548e-07									1.01718	1.25094		1.2563	1.11133	1.15198	1.30166	0.930461	0.88677	1.00229	1.01295	0.820773	1.06025	0.858547	0.947287	1.04177	0.961204	1.22514
	9.16237e-06	3.3649e-05		0.000165662	6.44902e-05	1.01131e-06	5.76973e-07	1.04153e-06	8.11429e-07	2.65472e-05	1.49779e-05	3.90353e-05	1.50538e-06	4.28384e-07	2.27346e-07	4.8077e-05	2.53934e-06	3.21618e-07									1.13159	1.15045		1.26932	1.33998	1.06857	1.13772	0.944306	0.902247	1.06671	1.14207	0.900392	1.02424	0.917717	1.077	1.02003	0.89929	1.04089
	7.34546e-06	3.16513e-05		0.000168447	6.05751e-05	9.56596e-07	5.88376e-07	9.94376e-07	8.02827e-07	2.39532e-05	1.40301e-05	4.84268e-05	1.56699e-06	4.07454e-07	2.06505e-07	4.99663e-05	2.61096e-06	3.34495e-07									0.907194	1.08215		1.29067	1.25863	1.01076	1.1602	0.901551	0.892682	0.962482	1.0698	1.11702	1.06615	0.872879	0.978274	1.06011	0.924653	1.08257
	9.8629e-06	3.50368e-05		0.000156835	6.26444e-05	9.45986e-07	6.11552e-07	1.05821e-06	7.51359e-07	2.50462e-05	1.61704e-05	4.37045e-05	1.5066e-06	4.355e-07	1.91254e-07	4.78356e-05	2.56709e-06	2.88334e-07									1.21811	1.1979		1.2017	1.30163	0.999545	1.2059	0.95943	0.835453	1.0064	1.233	1.00809	1.02507	0.932961	0.906026	1.01491	0.909117	0.933174
	1.01131e-05	3.45042e-05		0.000158525	5.64351e-05	9.10525e-07	5.6233e-07	1.18906e-06	7.4226e-07	2.37102e-05	1.43827e-05	4.02578e-05	1.45896e-06	3.67522e-07	1.96665e-07	4.52935e-05	2.64933e-06	3.04593e-07									1.24901	1.17969		1.21464	1.17261	0.962076	1.10884	1.07806	0.825336	0.952715	1.09668	0.928591	0.992654	0.787335	0.93166	0.960973	0.938243	0.985793
	7.70471e-06	3.51505e-05	6.63235e-05	0.000158391	5.1017e-05	1.01768e-06	6.77108e-07	1.10011e-06	7.35075e-07	2.12912e-05	1.22948e-05	4.39398e-05	1.40991e-06	4.08953e-07	2.37186e-07	4.75206e-05	2.61405e-06	3.49559e-07									0.951561	1.20179	1.16726	1.21361	1.06003	1.07529	1.33517	0.997413	0.817347	0.855516	0.93748	1.01352	0.959278	0.876092	1.12362	1.00822	0.925747	1.13132
	8.93893e-06	3.64597e-05	6.76798e-05	0.00015112	5.18453e-05	1.01476e-06	5.40131e-07	1.20549e-06	8.21325e-07	2.39716e-05	1.28666e-05	4.14029e-05	1.38655e-06	4.07657e-07	1.98464e-07	4.72342e-05	2.77673e-06	3.0785e-07									1.10399	1.24655	1.19113	1.1579	1.07724	1.07221	1.06507	1.09296	0.913249	0.963219	0.981079	0.955002	0.943391	0.873315	0.940182	1.00215	0.98336	0.996334
	6.69196e-06	3.62989e-05	6.58806e-05	0.000159675	6.28073e-05	9.70815e-07	6.8949e-07	1.16275e-06	7.56067e-07	2.26547e-05	1.53288e-05	3.60307e-05	1.53575e-06	4.02209e-07	1.74045e-07	4.9352e-05	2.52438e-06	3.34471e-07									0.826483	1.24105	1.15947	1.22345	1.30501	1.02578	1.35959	1.05421	0.840689	0.910305	1.16882	0.831087	1.0449	0.861645	0.824498	1.04708	0.893991	1.08249
	8.74293e-06	3.58064e-05	5.87625e-05	0.000159911	6.01755e-05	9.94605e-07	6.0535e-07	1.187e-06	6.80675e-07	2.35409e-05	1.37025e-05	3.68972e-05	1.53584e-06	4.06823e-07	1.74264e-07	5.16171e-05	2.52753e-06	3.30414e-07									1.07979	1.22421	1.03419	1.22526	1.25033	1.05092	1.19367	1.07619	0.756858	0.945914	1.04481	0.851073	1.04496	0.871529	0.825539	1.09514	0.895107	1.06936
	1.03185e-05	3.70424e-05	6.7074e-05	0.000144164	5.4227e-05	1.11428e-06	6.66154e-07	9.81605e-07	6.92427e-07	2.27388e-05	1.42526e-05	4.10593e-05	1.45519e-06	3.85058e-07	1.83853e-07	4.69919e-05	2.4681e-06	3.36852e-07									1.27438	1.26647	1.18047	1.10461	1.12673	1.17737	1.31357	0.889972	0.769926	0.913684	1.08676	0.947078	0.990087	0.824902	0.870961	0.997008	0.874062	1.0902
	6.61114e-06	3.35401e-05	6.67095e-05	0.000154128	5.61434e-05	1.01761e-06	6.64397e-07	1.08245e-06	7.28247e-07	2.27766e-05	1.35341e-05	3.54437e-05	1.6257e-06	3.96176e-07	1.58176e-07	4.67997e-05	2.72009e-06	3.07923e-07									0.816502	1.14673	1.17406	1.18095	1.16655	1.07522	1.31011	0.981407	0.809754	0.915203	1.03198	0.817547	1.1061	0.848719	0.749323	0.992929	0.9633	0.996572
	6.54901e-06	3.14786e-05	6.5936e-05	0.000160081	5.68949e-05	9.63918e-07	6.35075e-07	1.14515e-06	7.87375e-07	2.25137e-05	1.26853e-05	3.71446e-05	1.42988e-06	3.89411e-07	1.8268e-07	5.02833e-05	2.60057e-06	2.78294e-07									0.808828	1.07625	1.16044	1.22657	1.18217	1.01849	1.25229	1.03825	0.8755	0.904638	0.967253	0.856782	0.972866	0.834227	0.865405	1.06684	0.920975	0.900679
	9.09129e-06	3.66655e-05	7.90334e-05	0.000159518	5.72661e-05	1.05609e-06	5.48343e-07	9.85729e-07	7.50136e-07	2.62176e-05	1.41177e-05	4.70348e-05	1.47528e-06	3.87914e-07	1.942e-07	4.82972e-05	2.53764e-06	3.08536e-07									1.12281	1.25358	1.39095	1.22225	1.18988	1.11588	1.08126	0.893711	0.834093	1.05347	1.07648	1.08491	1.00376	0.83102	0.91998	1.0247	0.898687	0.998554
	8.97902e-06	3.20112e-05	6.97979e-05	0.000160089	5.64893e-05	9.98983e-07	6.11299e-07	1.11317e-06	7.54537e-07	2.67178e-05	1.62399e-05	4.17469e-05	1.46171e-06	3.87708e-07	2.21366e-07	4.69942e-05	2.68182e-06	2.9235e-07									1.10894	1.09445	1.22841	1.22662	1.17374	1.05554	1.2054	1.00926	0.838987	1.07356	1.23829	0.962937	0.994527	0.830579	1.04867	0.997057	0.949748	0.946171
	8.37646e-06	3.21646e-05	6.6218e-05	0.000157288	5.38348e-05	1.01664e-06	6.73538e-07	9.99775e-07	7.39724e-07	2.42807e-05	1.54443e-05	4.29451e-05	1.60105e-06	3.79921e-07	2.11982e-07	4.88104e-05	2.54084e-06	3.48856e-07									1.03453	1.0997	1.1654	1.20517	1.11858	1.0742	1.32813	0.906446	0.822516	0.975638	1.17763	0.990576	1.08933	0.813897	1.00422	1.03559	0.899821	1.12905
	9.90838e-06	3.32041e-05	6.55879e-05	0.00016817	5.53783e-05	9.52224e-07	6.77908e-07	1.14893e-06	6.55431e-07	2.24566e-05	1.56487e-05	4.00639e-05	1.53473e-06	3.56381e-07	1.74961e-07	4.68911e-05	2.73775e-06	3.30684e-07									1.22372	1.13524	1.15432	1.28854	1.15065	1.00614	1.33675	1.04168	0.728789	0.902343	1.19321	0.924117	1.0442	0.763467	0.828841	0.99487	0.969556	1.07023
	1.06169e-05	3.2947e-05	6.75268e-05	0.000158899	5.3659e-05	1.09709e-06	6.5275e-07	1.00295e-06	7.48481e-07	2.62338e-05	1.33767e-05	4.03098e-05	1.51082e-06	3.39209e-07	2.2753e-07	4.84678e-05	2.58171e-06	3.40341e-07									1.31123	1.12645	1.18844	1.21751	1.11493	1.1592	1.28714	0.909324	0.832253	1.05412	1.01997	0.929789	1.02794	0.72668	1.07787	1.02832	0.914295	1.10149
	1.03962e-05	3.34741e-05	6.78102e-05	0.000157007	5.28775e-05	1.01411e-06	6.72545e-07	9.79138e-07	7.16267e-07	2.34801e-05	1.21403e-05	4.42952e-05	1.52566e-06	3.66075e-07	2.41242e-07	5.0104e-05	2.57205e-06	3.67423e-07									1.28397	1.14447	1.19343	1.20301	1.09869	1.07153	1.32617	0.887735	0.796434	0.94347	0.9257	1.02172	1.03803	0.784235	1.14283	1.06303	0.910875	1.18914
	7.42682e-06	3.41204e-05	7.11598e-05	0.000149591	4.69735e-05	9.90589e-07	6.46385e-07	1.0816e-06	7.07329e-07	2.54279e-05	1.41359e-05	3.88654e-05	1.54674e-06	3.54301e-07	1.93947e-07	5.24383e-05	2.45988e-06	3.25729e-07									0.917241	1.16657	1.25238	1.14619	0.976018	1.04667	1.27459	0.98063	0.786496	1.02174	1.07787	0.896472	1.05238	0.759011	0.918782	1.11256	0.87115	1.0542
	7.57315e-06	3.43612e-05	7.52445e-05	0.000168168	5.68233e-05	1.02888e-06	6.29054e-07	1.04815e-06	6.90145e-07	2.44369e-05	1.44514e-05	4.2922e-05	1.53498e-06	3.90915e-07	1.57213e-07	4.71357e-05	2.63695e-06	3.26534e-07									0.935313	1.1748	1.32427	1.28853	1.18068	1.08713	1.24041	0.950309	0.767388	0.981917	1.10192	0.990043	1.04437	0.837449	0.744764	1.00006	0.933858	1.0568
	8.3844e-06	3.38855e-05	7.40863e-05	0.000168097	5.74116e-05	1.01744e-06	5.68991e-07	1.08034e-06	6.74586e-07	2.15227e-05	1.18812e-05	3.96793e-05	1.50858e-06	3.69527e-07	2.05451e-07	4.79098e-05	2.69896e-06	3.65185e-07									1.03551	1.15854	1.30388	1.28799	1.1929	1.07504	1.12198	0.979491	0.750087	0.86482	0.905946	0.915245	1.02642	0.79163	0.97328	1.01648	0.955819	1.1819
	7.92997e-06	3.46294e-05	7.6258e-05	0.000172624	5.43904e-05	9.65912e-07	5.91622e-07	1.12329e-06	6.61901e-07	2.54658e-05	1.50589e-05	3.90008e-05	1.50586e-06	3.43025e-07	1.73428e-07	4.92855e-05	2.64638e-06	2.89045e-07									0.979382	1.18397	1.3421	1.32267	1.13013	1.0206	1.1666	1.01843	0.735983	1.02326	1.14825	0.899596	1.02456	0.734856	0.821577	1.04567	0.937198	0.935473
																											1.03028	1.16567	1.28321	1.24968	1.11568	1.06019	1.22595	0.963319	0.767278	0.967041	1.03194	0.944615	1.03715	0.781436	0.920247	1.04756	0.92178	1.0835
