# Supplementary material for: Cholecystokinin modulates age-dependent thalamocortical neuroplasticity
Source: eLife journal article supplement (doi:10.7554/elife.101513), 2024-10-14
Supplement: data1 [file Figure 1D.xlsx]

## Sheet: Sheet1
C57 mice	200805_1	200807_1	200904-1	200904-2	201016-1	201016-2	201016-3	201023_1	210129-3	201203-3	201211_4	201212_4	200130-2													mean	se	sd
P53	0.977606	1.09201	0.926402	0.89121	0.966597	0.966952	0.98473	0.979309	1.04379	0.997196	0.927263	0.922588	1.01214		n=13 N=10											0.975984	0.014967	0.0539644
	0.923505	0.949814	1.06809	0.892215	1.0285	0.990714	1.00191	1.01753	0.964363	0.958754	1.0742	1.09792	0.965109													0.994817	0.0169401	0.0610784
	0.952941	0.980872	0.952667	1.05289	0.965513	1.0411	1.03796	1.01592	0.926834	1.10302	0.972108	0.993433	0.926887													0.994011	0.0147322	0.0531177
	1.03713	1.06634	0.924596	1.11379	0.954367	0.992245	0.995446	1.01412	0.963144	0.926003	1.04587	1.0913	0.996021													1.00926	0.016593	0.0598268
	1.01017	1.11751	1.03136	0.826787	1.00187	0.979978	0.995607	1.00974	1.04923	1.10162	0.984757	1.0197	1.012													1.0108	0.0191849	0.0691723
	1.01305	0.921658	1.06917	1.09651	1.07248	0.99773	1.02747	0.976199	1.01075	0.953019	1.0022	0.948476	1.06025													1.01146	0.0147395	0.0531439
	1.05168	0.92004	1.06142	1.17548	1.04817	1.01781	0.957754	1.05161	0.963975	0.968909	1.04664	1.08084	0.949487													1.0226	0.0192157	0.0692832
	1.03392	0.951756	0.966301	0.951117	0.962506	1.01347	0.999125	0.935574	1.07791	0.991473	0.946964	0.845735	1.07811													0.981075	0.0173466	0.0625442
		1.2386	1.05154	1.58717	1.33458	1.16721	1.1872	1.34675	1.2976	1.50224	1.68102	1.65613	1.09211													1.34518	0.0599152	0.216027
		1.178	1.14508	1.62451	1.14794	1.19028	1.1652	1.33516	1.27464	1.52524	1.52935	1.39295	1.11759													1.30216	0.0490892	0.176994
		1.16354	1.26541	1.52174	1.11757	1.13853	1.10882	1.36546	1.23908	1.38744	1.29097	1.13137	1.21495													1.24541	0.0355299	0.128105
		1.15367	1.1235	1.70168	1.09936	1.13798	1.14624	1.38353	1.33085	1.41935	1.08247	1.38248	1.27752													1.26989	0.0508652	0.183397
		1.14933	1.13488	1.64344	1.31165	1.13067	1.10498	1.4819	1.23746	1.44692	1.13144	1.20634	1.17171													1.26256	0.0480505	0.173248
		1.23884	1.03993	1.32887	1.35204	1.14136	1.13537	1.35748	1.21952	1.28695	1.27263	1.21645	1.12439													1.22615	0.0277686	0.100121
		1.16273	1.05088	1.51803	1.23879	1.05419	1.19616	1.46912	1.22129	1.38481	1.18201	1.20245	1.12303													1.23362	0.0415831	0.14993
		1.22091	1.07518	1.32661	1.14822	1.06772	1.13639	1.45384	1.20866	1.38632	1.12422	1.11914	1.19179													1.20492	0.0342307	0.123421
	1.77922	1.32264	1.23392	1.57187	1.17532	1.06499	1.13668	1.3112	1.24585	1.59156	1.08964	1.14654	1.24695													1.30126	0.0601575	0.216901
	1.57053	1.17217	1.12247	1.69227	1.25346	1.10604	1.12909	1.52823	1.1553	1.31746	1.26648	1.31336	1.08711													1.28569	0.0543734	0.196046
	1.56281	1.36272	1.18934	1.5787	1.11057	1.16747	1.13086	1.40759	1.18393	1.35349	1.1134	1.05734	1.33178													1.27308	0.0479165	0.172765
	1.4832	1.22371	1.18881	1.60172	1.09219	1.10555	1.15166	1.51455	1.1816	1.46636	1.15917	1.15915	1.25859													1.27587	0.0485244	0.174957
	1.25293	1.2741	1.20696	1.61762	1.08753	1.1529	1.21364	1.72641	1.23556	1.29491	1.17379	1.47844	1.1657													1.2985	0.0530148	0.191147
	1.39427	1.24436	1.12301	1.73391	1.17393	1.20996	1.22964	1.62979	1.17003	1.54933	1.30749	1.0731	1.24227													1.31393	0.0566539	0.204269
	1.27894	1.22325	1.16759	1.47703	1.13084	1.25123	1.18356	1.75247	1.0929	1.4291	1.21196	1.43202	1.214													1.29576	0.0504075	0.181747
	1.25943	1.28421	1.12029	1.45484	1.11655	1.22389	1.2793	1.60107	1.09437	1.25904	1.20159	1.16505	1.354													1.26259	0.0396512	0.142965
	1.21371	1.28323	1.04	1.3746	1.2274	1.18892	1.2487	1.45551	1.16518	1.53091	1.27227	1.26401	1.31523													1.27536	0.0350111	0.126234
	1.35804	1.21855	1.27422	1.80287	1.16653	1.17718	1.13588	1.63127	1.17903	1.51623	1.20375	1.33366	1.34673													1.33415	0.0561547	0.202469
	1.163	1.28748	1.25881	1.75145	1.21424	1.20529	1.1409	1.65356	1.22375	1.43771	1.22896	1.16331	1.31478													1.31102	0.0530007	0.191097
	1.32558	1.17425	1.19978	1.61704	1.08728	1.16341	1.17335	1.68407	1.13379	1.32601	1.26457	1.31788	1.31353													1.29081	0.0495779	0.178756
	1.26065	1.4156	1.18501	1.43999	1.10074	1.09391	1.25374	1.52832	1.15476	1.49856	1.04936	1.17291	1.31832													1.26707	0.0445706	0.160702
	1.25462	1.17703	1.11519	1.4561	1.1377	1.10256	1.24748	1.67957	1.22106	1.59487	1.11967	1.14466	1.36935													1.27845	0.0528939	0.190712
	1.19013	1.23191	1.20354	1.41963	1.2009	1.08855	1.20383	1.4291	1.30087	1.72028	1.36614	1.05037	1.41268													1.29369	0.0491125	0.177078
	1.27685	1.2221	1.02211	1.38005	1.10512	1.08344	1.22205	1.55396	1.27625	1.33998	1.23968	1.40605	1.34664													1.26725	0.0401091	0.144615
	1.17368	1.2492	1.15661	1.47263	1.23586	1.11964	1.17076	1.49858	1.20123	1.53346	1.30507	1.07609	1.3725													1.27425	0.041813	0.150759
	1.1863	1.30161	1.01947	1.36314	1.12885	1.09529	1.20527	1.51239	1.21512	1.40289	1.22884	1.07979	1.34699													1.23738	0.0395059	0.14244
	1.22389	1.28975	1.17552	1.61414	1.28912	1.12859	1.29035	1.69855	1.24041	1.60852	1.29919	1.10538	1.3639													1.33287	0.0528158	0.19043
	1.12699	1.28106	1.27334	1.6441	1.31541	1.1747	1.21467	1.59835	1.24858	1.4625	1.37611	1.17438	1.37465													1.32806	0.0444047	0.160103
	1.16851	1.24832	1.09687	1.78914	1.20424	1.19878	1.29668	1.80516	1.32381	1.43841	1.22821	1.04745	1.3915													1.32047	0.0652105	0.23512
	1.08423	1.27489	1.07611	1.43517	1.1844	1.13619	1.28889	1.59874	1.20711	1.72804	1.23681	1.37125	1.39642													1.30182	0.0539644	0.194572
