# Supplementary material for: Cholecystokinin modulates age-dependent thalamocortical neuroplasticity
Source: eLife journal article supplement (doi:10.7554/elife.101513), 2024-10-14
Supplement: data1 [file Figure 1G.xlsx]

## Sheet: Sheet1
	20211112-2	20211112-4	20211122-1	20211122-2	20211122-3	20211122-4	20211123-1	20211123-2	20211123-3	20211123-4	20211124-2	20211126-1	20211126-2	20211126-4	20211130-1	20211130-2	20211130-4									mean	se	sd
	0.635645	1.08227	1.1491	1.04977	1.09365	1.12564	1.07286	1.16019	1.29625	0.845261	1.01496	0.861071	0.964065	0.828559	1.02098	0.966669	1.00228									1.00995	0.037453	0.154423
	0.845654	0.685728	0.979385	0.971898	0.943666	0.910593	1.23323	1.11472	0.90082	1.23216	0.979598	1.04188	0.880618	1.12086	1.00594	1.33384	1.00819									1.0111	0.0386703	0.159442
	1.05758	1.16514	0.845092	0.87431	0.869065	1.0695	0.972537	0.998274	0.658166	1.23595	0.959512	1.22229	1.02609	1.14412	1.03525	1.29531	1.13914									1.03337	0.0396221	0.163366
	1.21752	1.08605	0.867423	0.878795	0.928124	0.945779	0.759916	0.827125	1.48578	0.983911	0.906349	0.835498	1.0164	1.10337	0.934066	0.977146	0.725363									0.96933	0.04414	0.181994
	1.29269	0.93532	1.03151	1.07624	1.00837	1.00031	0.810423	1.0063	0.883743	0.926206	1.31194	1.06031	1.04081	0.822627	1.04089	0.760885	0.977195									0.999163	0.0356194	0.146863
	0.961504	1.24893	1.08138	1.05741	1.12662	0.996082	1.1289	0.964081	0.86798	0.895534	0.741998	0.80376	1.01014	0.837894	0.864043	0.832862	1.3502									0.98643	0.0399009	0.164516
	0.920964	1.17482	1.05211	1.06224	1.09605	1.00948	0.962169	1.22705	1.22966	1.06154	0.945871	1.05221	0.962461	1.11331	0.966341	0.899608	0.788613									1.03085	0.028559	0.117752
	1.06844	0.621751	0.993998	1.02933	0.934456	0.942618	1.05997	0.70226	0.677605	0.819428	1.13977	1.12298	1.09941	1.02925	1.13249	0.933687	1.00901									0.959793	0.0395277	0.162977
	1.09222	1.01337	1.00528	1.02081	1.01872	0.978854	0.944275	0.945364	1.02895	0.937324	1.00919	0.974953	1.02585	0.981292	0.987566	0.880838	0.970077
	1.37164	1.2752	1.20554	1.2402	1.41373	1.44194	2.12057	0.720103	1.93985	1.95591	0.775504	0.810312	1.68104	1.1403	1.07419	1.2296	1.20592									1.3295	0.0984466	0.405906
	2.99242	1.19181	1.25254	1.13848	1.02053	1.39616	0.821212	0.741617	0.950717	1.01845	1.14085	1.06776	1.94778	1.14594	1.34247	1.65486	1.50971									1.31372	0.127549	0.525899
	1.92205	1.33278	1.28645	1.23756	1.19029	1.16289	0.815043	1.28266	1.34742	0.99399	1.89489	0.97598	1.03275	0.870791	1.23608	1.0888	1.05629									1.21922	0.0734144	0.302695
	1.26919	1.40289	1.44153	1.2554	1.26966	1.04537	0.911433	1.14608	0.992677	1.16833	1.44816	1.43304	1.14619	1.51233	1.10986	1.1946	1.00105									1.22046	0.0438597	0.180838
	1.24756	1.59469	1.36949	1.37684	1.33439	0.960114	1.44128	1.14508	1.08876	1.66154	1.28721	1.33552	0.803671	1.21169	1.65956	1.62454	1.12953									1.31009	0.0592177	0.244161
	2.1115	1.02691	1.2918	1.33789	1.22807	0.996847	1.05923	1.4637	1.43239	1.0312	1.66401	0.986331	1.35563	1.52932	1.08829	1.21586	1.07032									1.28761	0.0716108	0.295259
	1.53445	1.27864	1.33553	1.22007	1.27911	1.25848	1.20916	1.07196	1.0766	1.30639	0.92629	1.55548	1.20487	1.48823	1.56478	1.01108	1.42502									1.27918	0.0464431	0.19149
	1.80828	0.980061	1.14481	1.17842	1.17256	0.99993	1.40347	1.58599	1.64643	1.45756	0.784011	0.988517	1.3704	1.58217	1.66266	1.48502	1.27514									1.32503	0.0703657	0.290125
	1.34783	1.17885	1.34971	1.23516	1.24226	1.05229	1.21128	1.87679	1.92796	1.18735		1.1027	1.56807	1.44308	1.22536	1.63479	1.35783									1.37133	0.0628339	0.259071
	1.55733	1.08778	1.10059	1.02514	1.2637	0.932253	1.83932	1.06684	1.10252	1.93439	0.820844	1.17012	1.84631	1.29415	1.48279	1.11896	0.976722									1.27175	0.0825131	0.34021
	1.11312	1.28947	1.15272	1.20968	1.08806	0.825957	1.94247	1.70531	1.77651	1.98842	1.41533	1.03497	0.957069	1.42289	1.31861	1.42885	1.26949									1.34935	0.0814678	0.3359
		1.0866	1.18218	1.11319	1.23179	0.980785	1.09017	1.81178	1.72513	1.20125	2.06925	1.13317	1.6516	0.926743	1.16844	1.29843	1.25373									1.30776	0.0791702	0.326427
	1.42096	1.19606	1.10817	1.11393	1.31173	1.1032	1.65309	1.69289	1.70924	1.46748	1.44107	0.835215	1.43806	1.54261	1.23437	0.997229	1.01638									1.31069	0.0635533	0.262037
	1.31622	1.67905	1.11142	1.31758	1.39082	1.34924	1.77135	1.4923	1.35741	1.60253	0.930581	1.56834	1.01283	1.44563	1.05654	1.31318	1.33443									1.35585	0.0563672	0.232408
	0.934568	1.3208	1.11108	1.24168	1.25751	0.967854	1.71585	1.65305	1.68685	1.64232	1.75298	1.6022	1.68457	1.51085	1.44479	0.956603	1.24097									1.39556	0.0698111	0.287838
	1.31489	1.12228	1.31138	1.24837	1.36331	1.246	1.52522	1.60418	1.41355	1.56409	1.27043	1.11399	1.55417	1.29726	1.60896	1.53788	1.4144									1.38296	0.0390899	0.161172
	1.21033	0.987108	1.0909	0.997883	1.17385	1.0071	1.66244	1.59895	1.72948	1.57345	1.74513	1.22133	1.75264	1.55536	1.00428	1.52455	1.43352									1.36872	0.0710334	0.292878
	1.94225	1.33689	1.1753	1.13685	1.19048	1.01934	1.15388	1.59138	1.64795	1.58886	2.23723	1.07348	1.21761	1.3654	1.49038	1.09399	1.42044									1.39304	0.0800818	0.330186
	1.78467	1.44102	1.33824	1.01993	1.22638	0.705515	1.84896	1.03136	1.12753	1.81349	1.95554	1.38645	1.38701	1.45736	1.11895	1.29234	1.35154									1.36978	0.0809574	0.333796
	1.17934	1.43138	1.11241	0.947137	1.0261	0.886366	1.7697	2.1717	1.67178	1.72172	1.43652	1.43855	0.856819	0.878404	1.64086	1.26859	1.35208									1.34056	0.0907096	0.374005
	1.68852	1.47727	1.15712	1.14045	1.08664	1.20427	1.15155	1.5259	1.60518	1.15297	1.89372	1.13198	1.07563	0.779974	1.2326	1.38873	1.43685									1.30173	0.0665136	0.274243
	1.30541	1.39609	1.08583	1.01887	0.975237	0.833422	1.79605	1.15018	1.05947	1.83145	2.21756	0.820582	1.25952	1.45227	1.32292	1.1925	1.4931									1.3065	0.0901669	0.371768
	1.98008	1.3489	1.22014	0.923553	1.24463	0.874884	1.59648	0.936687	1.08902	1.81737	1.55311	1.33589	1.03714	1.00859	1.08696	1.23957	1.16531									1.26225	0.076485	0.315356
	1.80706	1.25523	1.15091	1.03673	1.44531	0.886163	1.12535	1.12367	1.91577	1.28725	2.04884	1.16817	1.35143	1.08451	1.41576	1.13006	1.27763									1.32411	0.0777456	0.320554
	1.15411	1.22527	1.30739	1.25545	1.41437	1.37125	1.03977	1.94802	0.913102	1.19788	1.46559	1.12964	1.23466	1.66577	1.11807	1.43822	1.45537									1.31376	0.059485	0.245263
	1.641	1.66968	1.4222	1.20664	1.22341	1.30165	1.19455	1.13271	1.22566	1.73143	1.45022	1.58588	1.15016	1.11713	1.3962	1.48246	1.1575									1.35815	0.0499554	0.205971
	1.85781	1.41159	1.17913	1.23025	1.27066	0.921694	1.83904	1.29286	1.28038	1.23615	2.27555	1.33566	1.33093	1.2758	1.31356	1.28822	1.2016									1.38476	0.0772822	0.318643
	1.7078	1.68188	1.27591	1.25994	1.26125	1.11234	1.12863	1.3217	1.04693	1.30866	1.21423	1.42463	1.41185	1.10103	1.28895	1.40528	1.51862									1.32174	0.0458157	0.188903
	1.40337	1.63038	1.27436	1.03606	1.15451	1.32176	1.14286	1.09676	1.17082	1.22944	2.37777	1.20337	0.94237	1.24722	1.63751	1.37308	1.63697									1.3458	0.0813086	0.335244
	1.65481	1.61338	1.13292	0.988609	1.25046	0.814494	1.45445	1.10104	1.92078	1.5057	1.85545	1.3866	1.39499	1.35713	1.10401	1.23739	1.33503									1.35925	0.0714983	0.294795
																										1.35394	0.0651721	0.268711
