# Supplementary material for: Cholecystokinin modulates age-dependent thalamocortical neuroplasticity
Source: eLife journal article supplement (doi:10.7554/elife.101513), 2024-10-14
Supplement: data1 [file Figure 2B.xlsx]

## Sheet: Sheet1
CCK-Cre mice Young adult	20211105-1-2	20211105-1-3	20211105-2-1	20211105-2-2	20211105-2-3	20211105-2-4	20211110-1-1	20211110-1-2	20211110-1-3	20211110-1-4	20211110-2-1	20211110-2-2	20211110-2-4	20211112-1-1	20211112-1-2	20211112-1-3	20211112-1-4	20211112-1-2	20211112-1-3	20211112-1-4	20220224-1-1	20220224-1-2	20220224-1-3	20220224-2-1	20220224-2-2
AAV9-EFIa-DIO-ChETA-EYFP_MGB	1.27444	0.951841	1.15571	0.827367	1.09717	1.19605	0.806402	1.01238	0.989741	1.03398	0.77611	0.959246	0.955505	1.03484	1.2719	1.04962	0.998225	0.905842	1.06194	0.930701	0.81227	0.848776	0.703619	1.12026	0.970862					0.989792	0.0296085	0.148042
laser in AC	0.887323	0.911258	0.838846	0.796961	0.858502	0.936264	0.966101	0.92306	0.982727	0.979475	0.784062	0.917833	1.07471	1.25007	1.10753	1.11866	0.989012	0.892257	0.865328	0.992218	1.23839	1.19992	1.27583	1.06579	0.998947		N=5			0.95581	0.0280781	0.14039
	0.731037	0.942621	1.17365	0.940765	1.01226	0.738496	1.20577	1.02384	0.99785	0.916541	1.28979	0.96666	1.03817	0.63654	0.799049	0.855442	0.987762	1.09535	1.05892	1.12129	1.2962	1.08898	1.33378	0.899334	0.990474		n=25			0.966945	0.035392	0.17696
	1.22379	1.07375	0.818674	1.06085	1.0605	1.10043	1.00179	1.00827	0.908643	1.14861	0.936148	1.05557	0.952859	1.31694	1.43057	1.09076	0.966717	0.975596	0.862186	0.983259	0.812342	0.724922	1.15	0.965897	0.855207					1.01937	0.0318046	0.159023
	1.23831	0.786141	0.924613	1.08961	0.995186	1.16528	1.10226	0.982891	0.99724	0.899987	0.693211	1.08112	1.09522	1.07525	0.690058	0.860935	1.03374	1.02202	1.14159	1.06891	0.716663	1.19991	1.06341	1.07027	1.04236					1.00145	0.0303463	0.151732
	0.696783	1.12934	1.0077	1.13476	0.998907	1.015	0.719113	1.02778	1.05512	0.976504	1.13495	1.03881	0.962636	0.913088	0.971325	0.989919	1.05877	0.944613	1.08613	1.05667	0.929014	1.20984	0.899553	0.833303	1.2526					1.00169	0.0260706	0.130353
	0.831545	1.09961	1.06982	1.1165	0.944018	0.782982	1.17898	0.996254	0.998338	0.90634	1.24739	1.03732	0.904907	1.0361	0.864006	0.881989	1.04077	1.04462	0.929958	0.875647	1.18214	0.957794	0.779112	1.06792	1.01015					0.991368	0.0246232	0.123116
	1.11677	1.10545	1.01098	1.03319	1.03346	1.0655	1.01958	1.02552	1.07034	1.13857	1.13834	0.943441	1.01599	0.737171	0.865558	1.15268	0.925015	1.1197	0.993939	0.971295	1.01299	0.769857	0.794697	0.977234	0.879407					0.996667	0.0231123	0.115561
	0.766511	0.853727	0.987574	1.08189	0.874883	0.823151	1.59903	1.08111	1.29709	0.912901	1.51591	1.12806	1.63513	1.28534	1.6681	1.63999	1.02992	1.43886	0.612426	0.614942	1.77875	0.823178	2.36641	1.04033	1.16282					1.20072	0.0839836	0.419918
	1.04852	1.08813	1.20631	1.2849	0.899824	0.839365	1.39996	1.18373	1.30828	1.03832	1.36172	1.12709	1.10693	1.22896	1.12035	1.26438	0.934064	1.3454	0.91501	0.764128	1.38669	1.24627	1.42847	1.01729	1.45442					1.15994	0.0387879	0.193939
	1.24378	1.18588	1.08374	1.22761	0.855897	1.26696	1.87571	1.09461	1.15092	0.925505	0.909527	1.1787	1.27619	0.849681	1.21911	1.63693	0.953645	1.31104	0.708797	0.699756	1.10441	1.88509	1.82805	1.11217	1.39913					1.19931	0.0655005	0.327503
	1.40344	1.36321	0.925523	1.01571	0.922401	1.34772	1.75705	1.04529	1.05673	1.69151	1.4125	1.29556	1.24996	0.840696	1.69208	1.17123	0.939874	1.37632	0.955167	0.84036	1.51871	0.981784	1.88514	1.02551	0.889611					1.22412	0.0621866	0.310933
	1.10007	1.28028	1.21668	1.28006	0.942105	1.1423	1.33674	1.23225	1.27547	1.49831	1.31908	1.03704	1.06693	1.16768	1.61218	1.00865	1.02469	1.2764	0.827627	0.673139	2.55598	2.7207	0.580274	1.6855	1.30033					1.28642	0.0959212	0.479606
	0.782481	1.08369	1.54327	1.52336	0.89237	1.46147	1.18679	1.48618	1.18011	0.995254	1.50757	1.25724	1.321	0.892176	1.48011	1.26983	1.0017	1.29743	1.24872	0.870638	1.51297	1.76448	1.44831	1.79149	1.42262					1.28885	0.0552	0.276
	0.784688	0.962539	1.13183	1.53034	1.00338	1.30713	1.62447	1.37562	1.25809	1.09717	0.932714	1.08441	1.1768	1.1275	1.00076	2.07005	1.04219	1.3589	1.31575	0.983225	1.92907	0.809769	3.37718	1.23254	1.47437					1.31962	0.10613	0.53065
	1.25411	1.21918	1.42375	1.13134	1.03442	1.04165	1.76807	1.13325	1.28121	1.45592	1.35967	1.23364	1.44231	1.19444	1.6597	1.7699	1.03748	1.34247	1.09411	0.881249	1.17421	1.82488	1.7558	1.35027	0.820556					1.30734	0.0558176	0.279088
	1.07564	1.06969	1.1431	1.80782	1.05679	1.2583	0.973943	1.05482	1.34794	1.10706	1.25725	1.09925	1.60109	0.7882	1.68644	1.48519	1.14018	1.26614	1.3458	1.10771	1.36455	1.01054	3.34902	1.14682	0.72859					1.29087	0.0994248	0.497124
	0.589197	1.17655	1.63381	0.912901	1.01903	1.2154	1.42852	1.15196	1.44236	1.34055	1.19945	1.22905	1.61429	1.02072	1.43799	2.00156	1.06575	1.26984	1.31923	1.00137	1.60717	1.25065	1.6033	1.37036	1.6762					1.30309	0.0593254	0.296627
	0.778346	1.38116	1.49368	1.36309	1.09046	1.43795	0.944325	0.990484	1.41332	1.31668	1.41657	1.34955	1.10744	0.91352	1.39377	1.14303	1.09635	1.28138	1.42442	1.20108	1.48569	3.16835	1.4987	0.905467	1.16114					1.31024	0.0881153	0.440577
	0.872884	0.965178	1.18411	0.932583	0.946289	1.09693	1.3289	1.24255	1.2638	1.01882	1.07338	1.35617	1.45888	1.19834	1.41705	2.20705	1.13392	1.47867	1.11187	1.09216	1.51736	1.12665	1.88676	1.11979	1.9417					1.27887	0.0659941	0.32997
	1.2834	1.27913	1.05641	0.920253	1.11609	1.19124	1.44492	1.64216	1.14619	1.22437	1.3999	1.33723	1.46331	0.985446	1.4187	1.7535	0.93114	1.35489	0.772682	0.82281	1.41835	1.52433	2.85537	1.21046	1.07502					1.30509	0.0812448	0.406224
	0.804485	1.23881	0.846247	1.28055	0.942127	1.10071	1.63884	1.13838	1.08319	1.23455	0.887961	1.28642	1.64162	1.17994	1.39567	2.0257	1.02729	1.23013	1.30643	1.25523	1.664	2.06065	1.09566	1.29561	1.04163					1.26807	0.0649085	0.324542
	1.43733	1.02027	1.69469	0.948934	1.08397	1.54027	1.84498	1.12033	1.36764	1.00879	1.3491	1.45437	1.25573	0.982728	0.791	1.89159	1.07625	1.32632	1.36796	1.16978	1.22771	1.41404	2.10758	0.83827	1.4366					1.31025	0.065943	0.329715
	0.668031	1.40104	1.50983	1.07233	1.0623	1.11987	1.53286	0.977057	1.2488	1.74928	1.48534	1.30327	1.30707	0.899257	0.813914	1.0156	1.17675	1.46945	1.20028	1.42551	1.48407	2.37758	1.19711	1.24659	0.956427					1.26798	0.0688003	0.344001
	1.23598	1.11574	0.913946	1.23827	1.11302	1.16271	1.31856	1.12171	1.26876	1.03432	1.13466	1.06429	1.06905	1.30553	1.36493	1.55312	1.01168	1.17652	1.50111	1.0329	1.93415	1.4519	1.33383	1.8788	1.69127					1.28107	0.0527354	0.263677
	1.06653	1.29824	1.22759	1.41531	1.11141	0.99174	1.17941	1.41484	1.1585	0.98149	1.32179	1.31583	1.27841	0.864807	1.88265	1.30578	1.12968	1.41238	1.29125	1.30351	1.09985	2.62849	0.688396	1.47146	1.10981					1.27797	0.0725386	0.362693
	0.757331	1.43217	1.59737	1.64203	1.04387	1.20907	1.87868	1.05037	1.24214	1.3851	1.40734	1.07763	1.26406	1.09653	1.70634	1.57607	1.12342	1.39108	1.4581	0.908778	1.15288	2.62181	1.68189	1.31096	0.902097					1.35669	0.0769667	0.384834
	0.716516	1.17081	1.62896	1.11037	1.03621	1.32161	1.22362	1.1657	1.14536	1.14331	1.54459	1.34486	1.50773	0.963444	1.21317	1.33489	0.976042	1.43365	0.942035	1.36825	1.47105	2.57411	2.44793	1.33386	1.06534					1.32734	0.0830081	0.41504
	1.57928	0.832436	1.21777	1.73049	1.16817	1.21957	1.14507	1.1851	1.15024	1.52714	0.955872	1.13844	1.59888	1.00281	1.54055	1.18218	1.12019	1.38282	1.28385	1.34574	1.13779	0.731542	1.80944	1.83894	1.16441					1.27955	0.057251	0.286255
	0.540044	1.04033	1.86421	0.892431	1.1832	1.05884	1.2768	1.34722	1.2665	1.28964	1.52004	1.48589	1.40137	1.37469	1.76837	1.23118	1.13484	1.378	1.46238	1.56108	0.755047	2.16417	1.89755	0.792515	1.22979					1.31665	0.0743013	0.371506
	0.837751	1.08663	0.948503	1.01197	1.20918	1.44364	1.44512	1.18537	1.26808	1.33805	1.38163	1.22981	1.30895	0.706691	1.95589	2.21469	1.29019	1.38749	1.46423	1.13602	0.760374	1.55295	2.30687	1.29474	1.00577					1.31082	0.0782734	0.391367
	0.95843	1.30121	1.01474	1.44225	1.17162	1.0264	0.937119	1.10667	1.59625	1.10873	1.26114	1.31995	1.39482	0.733539	1.58957	1.52839	1.15985	1.38812	1.56642	1.52873	0.861929	0.915139	1.847	1.41066	2.12876					1.2919	0.0652967	0.326484
	0.800454	0.808853	0.82085	1.22136	1.20181	1.30836	0.979736	1.06093	1.16731	1.31634	0.968927	1.19474	1.23142	1.14669	1.51854	2.14562	1.36959	1.44742	1.00828	1.49854	1.54589	1.15463	1.82986	1.84294	1.5766					1.28663	0.0671545	0.335773
	1.16066	1.11818	1.44127	1.54653	1.07052	1.5082	1.59313	1.29472	1.12678	1.06256	1.01035	1.20046	1.60701	1.17302	1.63737	2.19265	1.22397	1.48764	0.865834	1.40954	0.944247	1.2841	1.47143	1.25644	1.16957					1.31425	0.0566847	0.283424
	1.36039	1.19245	1.5361	1.46244	1.19952	1.28172	1.83598	1.12549	1.54936	0.955126	1.29521	1.41424	1.54575	0.783064	1.67254	1.19129	1.23486	1.35192	1.27668	1.29855	0.78895	0.873299	0.999842	1.24475	1.91815					1.29551	0.0580717	0.290358
	0.582455	1.14415	1.73805	0.901535	1.13067	1.22319	1.59016	1.09392	1.38312	1.70871	1.25614	1.32484	1.21534	1.00834	1.77664	1.76827	1.40208	1.41145	1.2401	1.31089	0.633512	0.876184	1.43153	1.32768	1.73659					1.28862	0.0661066	0.330533
	1.171	1.00018	0.918578	1.71062	1.23244	1.52348	1.72295	1.20685	1.26313	1.10147	1.23465	1.42186	1.63896	0.848633	1.47261	1.36682	1.38488	1.27284	1.54133	1.17161	1.23307	1.28478	1.42776	1.2473	1.90374					1.33206	0.0503447	0.251723
	0.688781	0.991703	1.5881	1.25489	1.0952	1.2681	1.36739	1.16196	1.28612	1.3835	1.24691	1.29325	1.15894	0.827489	1.39812	1.95312	1.3782	1.49547	1.25635	1.40532	1.98358	2.40165	1.18024	0.909995	1.05671					1.32124	0.0737362	0.368681
