# Supplementary material for: Cholecystokinin modulates age-dependent thalamocortical neuroplasticity
Source: eLife journal article supplement (doi:10.7554/elife.101513), 2024-10-14
Supplement: data1 [file Figure 2D.xlsx]

## Sheet: anti-scramble
	20210226_1	20210227_1	20210227_2	20210302_3	20210205-1	20210205-2	20210205-3	20210205-4	20210206-1	20210206-2-2	20210206-2-4	20210206-3	20210208-1	20210208-3	20210210-1	20210210-2	20230111
	0.916187	0.950872	1.13452	1.096	1.02185	1.03217	1.00735	0.980312	1.01216	1.01613	1.07266	1.02733	1.06882	0.971374	0.980553	1.199	0.987381		N=8		1.02792	0.0168883	0.069632
	1.01101	1.02995	0.800737	0.939718	0.955545	0.980309	0.953633	0.906272	0.974426	0.946537	0.959931	0.923617	0.95888	0.996632	0.866522	1.03649	0.9536		n=17		0.952577	0.0140089	0.0577602
	0.868568	1.02751	0.952442	1.00778	1.02056	0.937546	0.891204	1.107	0.962106	0.84296	1.00134	0.947733	0.997594	0.998935	1.02871	1.02814	1.00548				0.977977	0.0160652	0.0662386
	0.971528	0.923262	1.07049	1.08732	0.985903	1.044	1.00084	0.997212	1.00795	0.946258	1.04389	1.04204	0.940314	1.01466	0.881338	0.804602	1.00541				0.986296	0.0172522	0.0711325
	1.04829	1.05607	1.04676	0.92929	1.03891	0.930793	1.08682	1.0433	1.0174	1.08502	1.02014	0.988358	1.01697	0.98508	0.981215	1.19423	0.997579				1.02743	0.0151293	0.0623799
	1.03854	0.916946	0.86476	0.931506	1.0039	1.0223	0.978495	0.880734	0.998189	1.09891	1.07707	1.05057	0.945798	1.01858	1.08223	0.838077	1.02726				0.986698	0.0190633	0.0786001
	1.01528	1.04461	1.06332	1.05357	0.97289	0.997762	1.10356	1.13021	0.984711	1.03149	0.941462	1.06017	1.0178	1.01923	1.09679	1.03868	1.00437				1.03388	0.0117969	0.0486398
	1.13059	1.05078	1.06697	0.954809	1.00045	1.05511	0.9781	0.954965	1.04305	1.0327	0.883507	0.960177	1.05382	0.995523	1.08264	0.860789	1.01891				1.00723	0.0169753	0.0699908
	1.2708		1.31939	1.80487	1.44611	1.49781	1.49993	1.20213	1.02874	1.33083	1.14458	1.13879	1.42249	1.44463	1.4814	2.29015	1.37375				1.41852	0.0719675	0.29673
	1.26824	0.907354	1.35932	1.70975	1.31394	1.14921	1.46001	1.05837	1.07772	1.35675	1.32471	1.34778	1.37817	1.47573	1.34539	2.46932	1.46002				1.38011	0.081618	0.33652
	1.37558	0.988896	1.33856	2.29335	1.28046	0.990017	1.24384	1.3603	1.01999	1.29439	1.0516	1.26557	1.28255	1.46008	1.24134	2.3653	1.37171				1.36609	0.0945275	0.389747
	1.11459	1.03998	1.45146	1.7621	1.28266	1.23483	1.16831	1.11825	1.00589	1.40791	1.16421	1.29512	1.28968	1.42927	1.33699	1.96549	1.3695				1.31978	0.0596939	0.246124
	1.14051	1.17921	1.07349	2.45465	1.18462	1.23057	1.12531	1.16294	1.03683	1.34111	0.988917	1.08339	1.2677	1.46763	1.39618	2.05646	1.35004				1.32585	0.0921235	0.379835
	1.28608	1.16977	1.35205	1.40986	1.27116	1.24464	1.11646	1.05645	1.05353	1.17455	1.03289	1.18778	1.42313	1.3658	1.36019	1.89921	1.46137				1.28617	0.0505195	0.208297
	1.29774	1.08197	1.23083	1.84948	1.23436	1.01592	1.30847	1.3623	1.15552	1.2082	1.00511	1.12605	1.38881	1.39334	1.23476	1.95478	1.35835				1.30623	0.0618964	0.255206
	1.34919	1.15548	1.2723	1.65079	1.19868	0.989428	1.23969	1.1733	1.04362	1.24377	1.16185	1.15746	1.37841	1.31492	1.29775	1.93252	1.32236				1.28715	0.0537552	0.221638
	1.25224	1.33632	1.22122	2.3678	1.15191	1.32744	1.23814	1.38899	1.26653	1.26207	0.947524	1.00425	1.43379	1.35446	1.33554	1.52208	1.25841				1.33345	0.0730845	0.301335
	1.45423	1.12078	1.2075	2.27099	1.17042	1.00987	1.13256	1.21695	1.2005	1.0783	0.990933	1.20157	1.42915	1.32102	1.27048	1.53091	1.25474				1.28594	0.0711626	0.293411
	1.4711	1.12777	1.20746	1.56443	1.26092	0.984575	1.20791	1.20237	1.04093	1.13959	1.16069	1.16149	1.31273	1.3064	1.24139	2.07539	1.16287				1.27224	0.0605875	0.249809
	1.25252	1.32527	1.22549	2.33137	1.33592	1.04717	1.26266	1.25455	1.05435	1.10816	1.22672	1.20183	1.25304	1.30569	1.26809	1.53252	1.26079				1.3086	0.0694148	0.286205
	1.38864	1.29051	1.32513	2.09745	1.17279	1.21094	1.14768	1.32252	1.09542	1.33802	1.14642	1.1088	1.26037	1.23303	1.11281	1.42778	1.15162				1.28411	0.0565854	0.233308
	1.35782	1.37678	1.20381	1.44777	1.17855	1.10325	1.315	1.15856	1.23004	1.12398	1.06483	1.19776	1.48759	1.27547	1.30176	1.40575	1.21149				1.26119	0.0300036	0.123708
	1.30086	1.14164	1.29596	2.23984	1.18075	1.08709	1.08509	1.22828	1.26357	1.30192	0.989424	1.20607	1.30762	1.27713	1.23716	1.44104	1.21614				1.28233	0.0650802	0.268333
	1.56314	1.24384	1.30844	1.70093	1.30546	1.29942	1.37398	1.454	1.19118	1.35872	0.991154	1.15069	1.34674	1.33209	1.30742	1.15158	1.20753				1.31096	0.0396308	0.163402
	1.3803	1.42964	1.27706	1.73858	1.17021	1.07978	1.25935	1.21686	1.27485	1.40414	1.35643	1.06503	1.33182	1.30665	1.22377	1.48509	1.1737				1.30431	0.0391395	0.161376
	1.3015	1.29135	1.20493	1.55734	1.22681	1.11833	1.14676	1.26107	1.27812	1.40416	1.06092	1.28372	1.27826	1.20141	1.11388	1.62943	1.2011				1.26818	0.0360443	0.148614
	1.18403	1.43817	1.06921	1.64965	1.16845	1.12695	1.19828	1.22649	1.29932	1.41328	1.25081	1.20389	1.28494	1.31143	1.20482	1.18057	1.18871				1.25877	0.0333605	0.137549
	1.37487	1.36985	1.24262	1.59937	1.20154	1.05066	1.20633	1.31106	1.11731	1.40953	1.35464	1.30394	1.3854	1.19454	1.30266	1.23745	1.19473				1.28568	0.0310632	0.128077
	1.3657	1.29694	1.08923	1.61	1.12108	1.18171	1.36446	1.29953	1.11677	1.38633	1.28989	1.06998	1.28628	1.14163	1.27408	1.44713	1.10481				1.2615	0.0358478	0.147804
	1.25389	1.52605	1.21649	1.57722	1.28298	1.07105	1.30739	1.29263	1.14142	1.38679	1.08694	1.06563	1.17772	1.17502	1.1127	1.25599	1.15028				1.24001	0.0359584	0.14826
	1.34228	1.27963	1.10955	1.73486	1.14916	1.35315	1.20374	1.16588	1.16998	1.60393	1.2505	1.30271	1.18786	1.25799	1.35332	1.62997	1.21648				1.31241	0.0438314	0.180722
	1.28729	1.22966	1.02922	1.51205	1.24234	1.3336	1.21413	1.45061	1.10137	1.24954	1.09598	1.2825	1.32172	1.23972	1.11091	1.0684	1.15899				1.23106	0.0317632	0.130963
	1.42702	1.26311	1.02876	2.02144	1.15505	1.27979	1.27669	1.27813	1.23118	1.53742	1.26351	1.18751	1.20556	1.22785	1.15622	1.64881	1.22719				1.31854	0.0563926	0.232513
	1.38368	1.47176	1.1556	1.75708	1.22349	1.30516	1.30773	1.30936	1.20865	1.24717	1.297	1.10587	1.18993	1.28745	0.993473	1.10478	1.06962				1.25987	0.0424944	0.175209
	1.34497	1.31136	1.05217	1.48646	1.24129	1.3319	1.37915	1.32582	1.14593	1.44034	1.18017	1.06429	1.24066	1.2626	1.31759	1.33069	1.11343				1.26875	0.0301631	0.124366
	1.50427	1.54801	1.09923	1.57483	1.28312	1.35895	1.38095	1.33685	1.34281	1.37524	1.15259	1.1853	1.40867	1.21008	1.42615	1.20139	1.1845				1.32782	0.0342376	0.141165
	1.38057	1.40428	1.0935	1.60289	1.1239	1.24647	1.43169	1.30708	1.3113	1.39071	1.36092	1.09126	1.2814	1.2941	1.08405	1.51023	1.08911				1.29432	0.0380497	0.156883
	1.57677	1.50651	1.10025	1.73702	1.13307	1.24898	1.34378	1.41378	1.35571	1.5689	1.18161	1.21749	1.30701	1.23245	1.26706	1.08789	1.12994				1.31813	0.0456055	0.188036

## Sheet: anti-CCK
	20210117_1	20210117-2	20210121-1	20210121-2	20210202	20210217-1	20210217-2	20210217-3	20210218-1	20210218-3	20210219-1	20210222-1	20210222-2	20210223-4	20210217-2-1	20230112
	1.0201	0.980907	0.988539	1.05038	0.981298	0.997687	0.899091	0.998687	0.943567	1.07576	1.10303	1.13436	0.989866	1.02781	1.03098	1.00252		N=10		1.01404	0.0144711	0.0578843
	1.00946	0.957464	1.02727	0.992813	1.01704	0.978845	0.923907	1.05653	0.99933	1.00313	1.05812	0.86849	0.97783	1.03206	0.990129	0.969366		n=16		0.991361	0.011983	0.0479319
	1.07966	1.00572	1.00266	0.95119	0.987272	1.01637	1.07481	1.08853	1.03591	1.1201	0.92902	0.866849	0.994803	0.957357	1.02129	1.02463				1.00976	0.0161365	0.064546
	0.974394	1.02195	0.98789	1.0513	1.01778	1.02582	0.978799	1.05711	1.03487	0.969433	1.09103	1.05408	0.993575	1.04803	0.971062	0.988796				1.01662	0.00932339	0.0372936
	0.936267	0.984035	0.952589	1.03112	1.01114	1.00717	1.11011	0.924897	0.994045	0.872686	0.846316	1.1404	1.04001	1.0141	0.960806	0.98955				0.988453	0.0189692	0.0758767
	1.00904	1.09349	0.999424	0.942653	1.01335	1.01174	1.07022	0.982871	1.05034	1.06425	0.91084	0.88639	0.939438	0.991605	0.997984	1.00402				0.997978	0.0142688	0.0570753
	1.02602	0.934731	1.02746	0.981685	0.999036	0.988846	0.999337	0.933819	0.972431	0.852324	1.04938	0.9133	1.03233	0.972849	0.972845	1.00054				0.978558	0.0126194	0.0504777
	0.945063	1.02171	1.01417	0.998853	0.973085	0.973521	0.943731	0.957553	0.969512	1.04232	1.01226	1.13614	1.03214	0.956196	1.05491	1.02057				1.00323	0.0125352	0.050141
	0.903604	1.03828	1.01038	0.959299	0.85798	1.195	0.999966	0.955243	1.28297	1.33322	0.822442	1.02713	1.1854	0.950045	1.18684	1.07323				1.04882	0.0373669	0.149467
	0.859597	0.973867	1.02053	1.00391	0.870502	1.0939	1.0047	0.996441	1.13639	1.35875	0.801217	0.874898	1.01608	0.983565	1.12829	0.973661				1.00602	0.0332931	0.133173
	0.952417	0.946039	1.014	0.92063	0.902401	0.954456	0.938444	0.913509	1.00662	1.15927	0.88646	1.0199	1.00474	1.00947	1.14379	1.0163				0.986777	0.0195248	0.0780992
	0.93247	0.967628	1.02331	0.993347	1.0025	1.02457	1.01964	0.976235	1.04189	1.07023	1.20583	0.996097	0.951471	0.94533	1.08341	0.986622				1.01379	0.0166159	0.0664638
	0.898636	0.970657	1.02257	0.950925	0.993008	0.944707	0.997569	1.10184	1.05648	0.792551	0.872464	0.959018	1.00499	0.992923	1.08614	0.995182				0.977479	0.019484	0.077936
	1.02319	0.978687	1.04126	0.975611	0.976261	0.990703	0.971907	0.94823	1.00899	0.890323	0.9826	0.918938	0.960613	1.02524	1.02679	0.966121				0.980341	0.0100545	0.0402181
	0.871692	0.936594	1.01693	0.93227	0.93562	0.966804	0.98036	1.03113	0.996896	1.04331	1.11039	0.926559	1.0694	0.972793	0.990638	0.966262				0.984227	0.0150312	0.0601249
	0.923525	1.02659	1.01959	0.910342	0.944355	0.97771	1.02806	0.988978	0.970071	1.29444	1.21488	0.919149	0.978614	1.02451	1.17552	0.966162				1.02266	0.0277323	0.110929
	0.978084	0.916817	1.0179	0.93295	0.953276	0.988277	0.918852	0.988703	1.07587	1.08877	1.07928	0.909928	1.02282	1.00767	1.10363	0.953383				0.996013	0.0161401	0.0645605
	0.984891	0.964633	1.01998	0.99844	0.973944	0.980019	0.997945	0.979126	0.987335	0.825202	0.906705	1.14812	1.04208	1.04037	1.34415	0.961102				1.00963	0.0278859	0.111544
	0.971233	0.889821	1.02719	0.948614	0.939114	1.01525	1.00047	1.09195	0.968838	0.823337	1.07042	1.00892	1.04424	0.97079	1.22719	0.96723				0.997788	0.0224891	0.0899565
	0.928295	0.966003	0.994738	0.956754	0.932216	0.957661	0.946672	1.03771	0.965521	0.829478	0.942317	1.10759	1.06253	0.938902	1.29011	0.954805				0.988206	0.0254655	0.101862
	1.04942	0.918841	1.00392	0.948167	0.902243	0.957525	1.061	0.929627	0.953855	0.971775	1.1429	1.07392	1.05111	0.99244	1.18324	0.95094				1.00568	0.0202807	0.0811227
	0.915308	0.925754	1.03563	0.995903	0.925766	0.927997	0.965107	1.00303	0.963632	1.21672	1.01193	0.942896	0.988901	0.971856	1.18331	0.943977				0.994857	0.0218726	0.0874906
	0.825844	1.03832	1.00973	0.938924	0.924013	0.955596	0.935083	1.07877	0.991998	0.947109	1.09017	1.05129	1.06293	0.947021	1.19568	0.938084				0.99566	0.0219848	0.0879394
	0.934205	1.00814	0.948079	0.901528	0.873464	1.00904	0.927377	1.00003	0.971581	1.01982	0.990375	1.00375	0.959424	0.970073	1.19936	0.94079				0.978565	0.0180164	0.0720655
	1.01486	1.02267	0.992049	0.908032	0.897802	0.991155	0.881804	0.979716	0.909912	1.20678	1.24262	1.00427	0.942188	0.982304	0.952506	0.914693				0.99021	0.0254599	0.10184
	0.997577	1.04795	1.00413	0.962928	0.889701	1.00954	1.01847	1.02779	0.925851	0.856818	1.08454	0.896984	1.01167	1.01958	1.05451	0.945541				0.984599	0.0162644	0.0650578
	0.904577	1.02587	1.0199	0.95857	0.913857	0.94465	1.00294	1.09757	0.943561	0.829555	1.33375	1.13533	0.996138	1.01423	1.05316	0.937295				1.00693	0.0288708	0.115483
	0.992184	0.945103	0.963036	0.930795	0.929034	0.960006	1.07684	1.05795	0.873689	0.7942	1.09659	1.11482	0.94828	0.999976	1.26421	0.91623				0.991434	0.0277095	0.110838
	0.974521	1.11679	1.01085	0.89345	0.886785	0.933982	0.956157	0.973791	0.947034	1.07501	0.94618	0.863998	0.945134	0.932546	1.19111	0.90145				0.9718	0.022027	0.0881082
	0.928308	0.976695	1.0152	0.980375	0.86667	0.948509	0.958618	0.991186	0.906729	1.55982	0.808644	0.918037	1.04828	0.945952	1.19747	0.933084				0.998973	0.0429464	0.171786
	0.95218	0.94831	1.00052	0.960318	0.894535	0.948372	1.09083	1.13829	0.893857	0.997747	0.966541	0.984794	0.99069	0.951909	1.03433	0.901792				0.978438	0.0165959	0.0663836
	1.0343	1.05255	0.99299	1.01036	0.87771	0.964422	0.9117	1.03219	0.893427	1.02858	0.976452	0.980869	1.05873	0.953299	1.08141	0.9116				0.985038	0.0156438	0.0625751
	0.941671	0.93317	1.0033	0.982895	0.843642	0.942178	1.0207	1.10578	0.89778	0.900396	0.935126	1.13849	1.04555	0.931655	1.13419	0.900538				0.978567	0.0222333	0.0889331
	0.973258	1.14712	0.987729	0.920062	0.840887	1.01079	1.1634	0.991274	0.915252	0.876697	0.804861	0.925771	1.00025	0.997735	1.28115	0.911634				0.984242	0.0309549	0.12382
	0.868123	1.08455	0.972296	0.943379	0.839151	0.947818	0.932829	1.08029	0.895099	1.28604	1.06763	1.00593	0.965296	0.923833	1.23796	0.900441				0.996917	0.0315496	0.126198
	0.906956	1.0201	0.989562	0.877076	0.829109	0.950501	1.07577	1.07242	0.893745	1.31323	0.874684	0.929519	1.01276	0.937586	1.07078	0.903055				0.978554	0.0294467	0.117787
	0.923066	0.950422	0.958699	0.949551	0.834634	0.982528	1.06815	1.08615	0.896956	1.08781	1.03486	1.18185	1.03261	0.983876	1.19525	0.902498				1.00431	0.0252992	0.101197
	0.953743	1.15055	1.00395	0.976532	0.84374	1.01224	1.08348	1.09284	0.903236	0.723782	1.06499	1.048	0.955857	0.941858	1.25215	0.905102				0.994502	0.0313012	0.125205
