# Supplementary material for: Cholecystokinin modulates age-dependent thalamocortical neuroplasticity
Source: eLife journal article supplement (doi:10.7554/elife.101513), 2024-10-14
Supplement: data1 [file Figure 2F.xlsx]

## Sheet: Laser in soma_CCK-Cre
Time	0719_1 side_210431_HFLS_5	0719_2 side_013632_1	0719_2 side_003439_1	0812_181818_2	0812_170212_4	0812_170212_5	0813_1 side_1	0813_1 side_2	0815_1 side_2914_2	0815_1 side_5901_3	0816_1 side_4652_1	0816_1 side_4105_13	0816_2 side_5019_3	0816_2 side_5019_2	0902_1 side_3806_1	0902_1 side_0907_2	0902_2 side_5556_5	0903_2 side_1817_3	0903_2 side_1817_3	0903_2 side_1817_5	0913_1 side_1137_3				mean_N=11,n=21	sd	se
-24.9545	-0.0614896	-0.108168	-0.0553465	0.280131	-0.0218639	-0.0690778	0.352321	0.0668738	0.0707528	-0.258588	0.0652645	-0.209035	-0.0548582	-0.0833216	0.0242373	0.133032	0.125219	0.0366666	0.0366666	-0.121613	-0.0476486				0.00476927	0.140388	0.0306352
-24.8562	-0.0664157	-0.138097	-0.0507112	0.283011	-0.0116486	-0.0596666	0.364858	0.0555668	0.0702086	-0.23292	0.0558267	-0.204382	-0.0603641	-0.0897919	0.0193646	0.125364	0.137461	0.0289038	0.0289038	-0.10974	-0.0346051				0.00529168	0.139922	0.0305334
-24.7579	-0.0700671	-0.170546	-0.0443751	0.283021	-0.00148985	-0.0521675	0.377166	0.0369294	0.0631062	-0.2086	0.0442266	-0.198508	-0.064997	-0.101887	0.0181653	0.114209	0.14921	0.0182291	0.0182291	-0.0929694	-0.0203291				0.00459787	0.139861	0.0305202
-24.6596	-0.0744393	-0.20269	-0.0375849	0.281638	0.00720635	-0.0489066	0.390843	0.021534	0.0560737	-0.183465	0.0305753	-0.191776	-0.0722442	-0.111165	0.0183163	0.100029	0.157506	0.00731206	0.00731206	-0.0790337	-0.00672022				0.00334864	0.140819	0.0307292
-24.5613	-0.0770786	-0.229847	-0.0291843	0.279438	0.0123529	-0.0459256	0.400701	0.00637131	0.0474249	-0.154658	0.01496	-0.184891	-0.0827997	-0.118697	0.0155913	0.087707	0.161578	-0.000310002	-0.000310002	-0.0713003	0.0079348				0.00185985	0.141625	0.0309051
-24.4629	-0.0763569	-0.25905	-0.0245753	0.275525	0.0199889	-0.0416611	0.405676	-0.0121672	0.0377357	-0.127278	-0.000297175	-0.178085	-0.0955368	-0.126757	0.0104619	0.0742898	0.172004	-0.00178202	-0.00178202	-0.0652383	0.026283				0.000542681	0.143262	0.0312624
-24.3646	-0.074066	-0.286338	-0.0182255	0.272114	0.0263944	-0.0379078	0.40964	-0.0274297	0.0246428	-0.100371	-0.0125881	-0.171487	-0.108658	-0.130593	0.00230425	0.0618122	0.184315	0.00374286	0.00374286	-0.0616121	0.040275				-1.4017e-05	0.145553	0.0317622
-24.2663	-0.0691457	-0.304979	-0.00502491	0.268744	0.0322873	-0.0367259	0.40903	-0.0371781	0.00871104	-0.0741433	-0.0215486	-0.166342	-0.119002	-0.131947	-0.0112231	0.0501333	0.193164	0.0113908	0.0113908	-0.0578368	0.0545974				0.000207251	0.146862	0.0320479
-24.168	-0.063515	-0.321811	0.0117689	0.266558	0.0392999	-0.0402919	0.408223	-0.0391878	-0.00282909	-0.0467183	-0.0309639	-0.161024	-0.133651	-0.127406	-0.0251878	0.0413923	0.198416	0.0216616	0.0216616	-0.050954	0.071468				0.00175758	0.148582	0.0324231
-24.0697	-0.0591518	-0.331878	0.03165	0.263163	0.0455628	-0.0456074	0.404696	-0.0388543	-0.012626	-0.0251086	-0.0419555	-0.153366	-0.149421	-0.118144	-0.0372112	0.0331009	0.196837	0.0362892	0.0362892	-0.0428031	0.088217				0.00379422	0.149423	0.0326067
-23.9714	-0.0519544	-0.343035	0.053034	0.260537	0.0526145	-0.0476224	0.402628	-0.0410633	-0.0204255	-0.0051363	-0.0511651	-0.145269	-0.162379	-0.107251	-0.0481768	0.0242514	0.192062	0.0520381	0.0520381	-0.0350251	0.104321				0.00642956	0.150931	0.0329359
-23.8731	-0.0450904	-0.350791	0.0760548	0.259339	0.0590129	-0.0497228	0.399586	-0.0440432	-0.025937	0.010712	-0.0575604	-0.134324	-0.175671	-0.103059	-0.0593578	0.0195533	0.1806	0.0698166	0.0698166	-0.0249216	0.115564				0.00902747	0.152417	0.0332602
-23.7748	-0.0398868	-0.358961	0.0996453	0.25185	0.064151	-0.0549731	0.396263	-0.0468408	-0.0313892	0.0250125	-0.0629126	-0.123409	-0.187515	-0.102524	-0.0702006	0.0164703	0.167541	0.0864431	0.0864431	-0.0117335	0.122835				0.0107766	0.153937	0.0335919
-23.6765	-0.0316216	-0.363609	0.127723	0.241616	0.0699306	-0.0594996	0.389845	-0.0454895	-0.0397092	0.0380418	-0.0705154	-0.11413	-0.199225	-0.105139	-0.0787098	0.0141557	0.156292	0.103429	0.103429	0.00164486	0.123578				0.0124779	0.155283	0.0338856
-23.5782	-0.0201076	-0.364963	0.160167	0.232244	0.0716127	-0.0605774	0.380811	-0.0387389	-0.0481462	0.050546	-0.0804834	-0.102058	-0.209032	-0.106499	-0.0838655	0.0136704	0.143502	0.119918	0.119918	0.0140654	0.126231				0.0151531	0.156326	0.0341132
-23.4799	-0.0108388	-0.36594	0.189698	0.224087	0.0687151	-0.0642671	0.369754	-0.0340505	-0.0531503	0.0598534	-0.0900275	-0.0914614	-0.217527	-0.110779	-0.0909841	0.0161631	0.130951	0.133053	0.133053	0.0232223	0.129555				0.0166229	0.157668	0.0344059
-23.3816	-0.00791124	-0.366012	0.213088	0.217232	0.0644289	-0.0696661	0.358897	-0.028385	-0.0585653	0.0675193	-0.0995444	-0.0804493	-0.227882	-0.118095	-0.101285	0.0205878	0.112059	0.141192	0.141192	0.0282717	0.1262				0.015851	0.158872	0.0346687
-23.2833	-0.00524333	-0.365651	0.235606	0.211414	0.0586587	-0.0705899	0.348921	-0.0199352	-0.0622499	0.0753519	-0.105812	-0.0708369	-0.240017	-0.124239	-0.108249	0.0305292	0.0966537	0.150098	0.150098	0.0331373	0.123696				0.0162544	0.160537	0.035032
-23.185	-0.000772135	-0.361298	0.254019	0.20559	0.0507475	-0.0712733	0.339401	-0.00888591	-0.0626735	0.0822069	-0.109865	-0.0608784	-0.251354	-0.128378	-0.115568	0.0442776	0.0846629	0.162953	0.162953	0.0372215	0.122456				0.0178829	0.162075	0.0353677
-23.0867	0.00481464	-0.351564	0.271665	0.199301	0.043571	-0.0693586	0.329907	0.00768746	-0.0659843	0.0851339	-0.112219	-0.0517791	-0.263434	-0.131155	-0.12635	0.0602822	0.0687671	0.177728	0.177728	0.0390914	0.112382				0.0193436	0.163303	0.0356357
-22.9884	0.0104007	-0.342978	0.287103	0.196726	0.034874	-0.066287	0.323649	0.024221	-0.0696323	0.0873051	-0.117889	-0.0440176	-0.271998	-0.135601	-0.135448	0.0773343	0.0518041	0.189928	0.189928	0.0394214	0.1045				0.0206354	0.16521	0.0360518
-22.8901	0.0167457	-0.330856	0.298601	0.195896	0.021562	-0.0668333	0.316625	0.0384845	-0.0747013	0.0855159	-0.123068	-0.0312431	-0.276081	-0.136894	-0.143246	0.0981072	0.0332143	0.198705	0.198705	0.0415141	0.0926778				0.0215919	0.165998	0.0362237
-22.7918	0.0202568	-0.317416	0.310584	0.197127	0.0035447	-0.0657995	0.30687	0.054878	-0.076514	0.0826214	-0.131814	-0.020072	-0.277994	-0.13591	-0.149314	0.119901	0.00855125	0.208134	0.208134	0.0397308	0.0764916				0.0219995	0.166886	0.0364175
-22.6935	0.0248112	-0.302866	0.318852	0.201557	-0.0105842	-0.0603269	0.295633	0.0775329	-0.0708099	0.0792338	-0.136471	-0.0125294	-0.282758	-0.131315	-0.157359	0.146582	-0.0117972	0.221163	0.221163	0.0357923	0.0625197				0.0241916	0.168492	0.0367679
-22.5952	0.0306318	-0.286806	0.327127	0.208564	-0.0233703	-0.0496354	0.283655	0.100297	-0.0660065	0.0724472	-0.141774	-0.00559359	-0.2867	-0.129136	-0.168428	0.175851	-0.0289378	0.232646	0.232646	0.032166	0.050506				0.0266738	0.170834	0.0372789
-22.4969	0.0345219	-0.27362	0.331852	0.215528	-0.0378269	-0.0391065	0.276773	0.118554	-0.0661285	0.0628157	-0.147183	0.00274024	-0.284686	-0.129431	-0.178959	0.204721	-0.0452533	0.240719	0.240719	0.0303147	0.0396351				0.0284144	0.173405	0.0378401
-22.3986	0.0355525	-0.259266	0.333358	0.222629	-0.0532782	-0.029719	0.272745	0.142298	-0.0665728	0.0515656	-0.152575	0.0104934	-0.283298	-0.130604	-0.18905	0.235732	-0.0659546	0.240959	0.240959	0.0285543	0.0232547				0.0289421	0.176052	0.0384176
-22.3003	0.0342684	-0.247859	0.332741	0.231311	-0.0657856	-0.0202163	0.270443	0.162724	-0.065143	0.036056	-0.15893	0.018783	-0.286842	-0.134793	-0.19711	0.263655	-0.0875112	0.23745	0.23745	0.0249813	0.0105798				0.028393	0.179335	0.0391341
-22.202	0.0308735	-0.243135	0.325461	0.240245	-0.07789	-0.00725322	0.273423	0.177693	-0.0617845	0.0228899	-0.166149	0.0300163	-0.290601	-0.138612	-0.199776	0.287434	-0.104564	0.232248	0.232248	0.0203853	-0.00127003				0.0277087	0.182354	0.0397928
-22.1037	0.025319	-0.233717	0.317133	0.245858	-0.0939898	0.00889635	0.276805	0.191548	-0.0587957	0.00837662	-0.177596	0.0399449	-0.288642	-0.140884	-0.202929	0.310486	-0.121663	0.222485	0.222485	0.0155679	-0.0190431				0.0260783	0.184654	0.0402949
-22.0053	0.0200843	-0.225603	0.304485	0.250533	-0.113571	0.0243576	0.283582	0.20226	-0.0597047	-0.00655023	-0.189588	0.0482686	-0.286388	-0.147011	-0.206474	0.33479	-0.136746	0.212789	0.212789	0.0106231	-0.0341064				0.0237533	0.187783	0.0409775
-21.907	0.012438	-0.217797	0.286435	0.25464	-0.134887	0.0376462	0.288914	0.212745	-0.0630665	-0.0193475	-0.20348	0.0555747	-0.282789	-0.152212	-0.210036	0.357729	-0.145441	0.205406	0.205406	0.0056796	-0.0482309				0.0212061	0.190905	0.0416589
-21.8087	0.00170051	-0.213267	0.264568	0.260493	-0.154789	0.0510747	0.291794	0.222634	-0.0706524	-0.0311325	-0.219492	0.0615703	-0.282412	-0.151912	-0.212998	0.375057	-0.148557	0.195894	0.195894	0.00177202	-0.0611113				0.0179108	0.193616	0.0422506
-21.7104	-0.00836744	-0.211341	0.238426	0.271891	-0.170824	0.0663379	0.295197	0.230325	-0.0789857	-0.0403004	-0.233854	0.0675127	-0.28465	-0.150704	-0.21625	0.390996	-0.149459	0.188325	0.188325	-0.0037696	-0.0713328				0.0151189	0.196801	0.0429454
-21.6121	-0.0190642	-0.210918	0.20585	0.285599	-0.186301	0.0825813	0.29885	0.233931	-0.0815672	-0.0483592	-0.24481	0.0733331	-0.28573	-0.14671	-0.220868	0.406244	-0.150964	0.177927	0.177927	-0.00816229	-0.076442				0.0124926	0.199329	0.0434973
-21.5138	-0.0303773	-0.209267	0.169339	0.296982	-0.198225	0.100502	0.305153	0.23385	-0.0825083	-0.0570703	-0.25491	0.0775088	-0.284541	-0.140889	-0.226923	0.420703	-0.150708	0.170504	0.170504	-0.011473	-0.0789769				0.010437	0.201669	0.0440077
-21.4155	-0.0360312	-0.208375	0.135368	0.307593	-0.208838	0.122229	0.311216	0.233754	-0.086741	-0.0660827	-0.267552	0.0835445	-0.284812	-0.135241	-0.232736	0.433649	-0.144416	0.166366	0.166366	-0.0133628	-0.0862331				0.00903162	0.204927	0.0447188
-21.3172	-0.0372458	-0.208661	0.104537	0.319126	-0.218317	0.14362	0.313713	0.231463	-0.0891937	-0.0777286	-0.278923	0.0908282	-0.28442	-0.130838	-0.235665	0.443829	-0.131803	0.162615	0.162615	-0.0145601	-0.0933236				0.00817458	0.207747	0.0453341
-21.2189	-0.0376952	-0.207121	0.0723055	0.329074	-0.226808	0.160623	0.315393	0.220247	-0.0912203	-0.0910351	-0.289657	0.0995558	-0.280086	-0.127474	-0.237775	0.44704	-0.117539	0.157364	0.157364	-0.0148298	-0.102028				0.00646182	0.20904	0.0456163
-21.1206	-0.0338853	-0.206232	0.0417219	0.338562	-0.233231	0.179703	0.315036	0.20449	-0.0939587	-0.101857	-0.299078	0.104836	-0.275698	-0.124751	-0.238712	0.442844	-0.101287	0.149949	0.149949	-0.0149233	-0.11292				0.00431216	0.209298	0.0456725
-21.0223	-0.0312244	-0.207689	0.0106081	0.346373	-0.23801	0.195245	0.309175	0.183604	-0.0951475	-0.110257	-0.304458	0.111487	-0.271483	-0.124266	-0.234888	0.433362	-0.0834577	0.140158	0.140158	-0.0165447	-0.118632				0.0016244	0.207854	0.0453574
-20.924	-0.0264018	-0.208136	-0.0170822	0.350939	-0.239026	0.210016	0.29895	0.164815	-0.0956831	-0.117964	-0.30764	0.120706	-0.270002	-0.120135	-0.230852	0.422896	-0.0629102	0.134416	0.134416	-0.0161775	-0.124525				2.95078e-05	0.206196	0.0449957
-20.8257	-0.0214549	-0.210494	-0.037883	0.356556	-0.23617	0.225818	0.287617	0.145822	-0.0966477	-0.121193	-0.306287	0.127083	-0.270465	-0.113544	-0.226705	0.410579	-0.0417472	0.128806	0.128806	-0.0161051	-0.128403				-0.000762488	0.204212	0.0445628
-20.7274	-0.0161705	-0.215455	-0.0627176	0.360903	-0.229968	0.240284	0.276824	0.124708	-0.0953521	-0.125539	-0.302591	0.132891	-0.269843	-0.105744	-0.221188	0.395395	-0.0151663	0.123198	0.123198	-0.0124171	-0.131635				-0.00125651	0.201782	0.0440325
-20.6291	-0.0126125	-0.217746	-0.0861373	0.359882	-0.227037	0.25112	0.266328	0.101562	-0.0994276	-0.130143	-0.302832	0.140182	-0.265303	-0.100559	-0.213219	0.377627	0.00690314	0.116721	0.116721	-0.00847312	-0.13978				-0.00315345	0.19926	0.0434822
-20.5308	-0.0101043	-0.219251	-0.110965	0.356928	-0.22181	0.258873	0.256408	0.080423	-0.101697	-0.128855	-0.300718	0.150185	-0.257773	-0.0956208	-0.202051	0.356246	0.0232182	0.109383	0.109383	-0.00172585	-0.149121				-0.0046974	0.195888	0.0427463
-20.4325	-0.00634068	-0.220154	-0.134705	0.352471	-0.210687	0.266923	0.243158	0.0653825	-0.0976494	-0.129567	-0.295143	0.159763	-0.252554	-0.0855344	-0.187048	0.333956	0.0451633	0.101237	0.101237	0.00624552	-0.157878				-0.00484405	0.191921	0.0418806
-20.3342	-0.0006875	-0.218348	-0.154176	0.346064	-0.198171	0.274572	0.227608	0.0447811	-0.0937922	-0.130567	-0.288321	0.168708	-0.244113	-0.0758733	-0.169665	0.309153	0.0684367	0.0952295	0.0952295	0.0139364	-0.166677				-0.00460348	0.18736	0.0408852
-20.2359	0.00644167	-0.212406	-0.172922	0.337721	-0.186457	0.283511	0.214301	0.0232403	-0.0922934	-0.128038	-0.280451	0.178006	-0.227949	-0.0678171	-0.152709	0.283287	0.086842	0.0879443	0.0879443	0.0256802	-0.174556				-0.00384184	0.182566	0.0398391
-20.1376	0.0147902	-0.204492	-0.188286	0.325944	-0.172196	0.289531	0.198636	0.0032684	-0.0920267	-0.130452	-0.275476	0.186262	-0.21411	-0.0577422	-0.138436	0.259769	0.106151	0.0809638	0.0809638	0.0394157	-0.18367				-0.00339002	0.178351	0.0389193
-20.0393	0.0242393	-0.202754	-0.204845	0.317782	-0.155059	0.295805	0.186164	-0.0206911	-0.0934511	-0.134372	-0.26648	0.197496	-0.20207	-0.0555854	-0.123174	0.234905	0.125771	0.0776203	0.0776203	0.0501401	-0.190832				-0.00294142	0.175793	0.0383612
-19.941	0.0361018	-0.203127	-0.21966	0.311886	-0.132634	0.301403	0.171358	-0.0415517	-0.0899231	-0.135773	-0.254208	0.208099	-0.190629	-0.0538945	-0.107739	0.208718	0.147629	0.0696584	0.0696584	0.0574149	-0.197837				-0.0021452	0.173248	0.0378058
-19.8427	0.0495198	-0.202284	-0.226788	0.305632	-0.108842	0.305389	0.161065	-0.0611776	-0.0841887	-0.136342	-0.242367	0.219039	-0.178689	-0.0551752	-0.0904433	0.183256	0.161956	0.0595112	0.0595112	0.0646949	-0.204432				-0.00100736	0.170631	0.0372347
-19.7444	0.0660182	-0.198146	-0.231834	0.297097	-0.0857695	0.310504	0.153788	-0.0834793	-0.0780345	-0.134288	-0.22795	0.228573	-0.161511	-0.0607467	-0.0735186	0.160626	0.172267	0.0525766	0.0525766	0.0706225	-0.210198				0.000913055	0.16814	0.0366911
-19.6461	0.0853104	-0.190354	-0.234116	0.285323	-0.0660883	0.315906	0.144398	-0.104595	-0.073376	-0.134493	-0.213986	0.236593	-0.1395	-0.0644138	-0.0547457	0.137843	0.18036	0.044949	0.044949	0.0767685	-0.21804				0.00279483	0.16567	0.0361521
-19.5478	0.103134	-0.178316	-0.231125	0.269856	-0.0464247	0.318482	0.136365	-0.125894	-0.0730342	-0.13333	-0.199733	0.246826	-0.11655	-0.0679887	-0.0328676	0.114986	0.184176	0.0412541	0.0412541	0.0839792	-0.230761				0.0049661	0.163336	0.0356428
-19.4494	0.117594	-0.166084	-0.226705	0.255446	-0.0261437	0.316697	0.128032	-0.149068	-0.0728275	-0.13297	-0.183329	0.256665	-0.0961914	-0.0747604	-0.0105769	0.0927239	0.190199	0.0354986	0.0354986	0.0924381	-0.244459				0.00655607	0.161802	0.035308
-19.3511	0.126306	-0.153412	-0.222619	0.239543	-0.00120336	0.314979	0.122455	-0.170685	-0.0711674	-0.13276	-0.166691	0.265965	-0.0745388	-0.0828272	0.0126693	0.0689311	0.18694	0.028847	0.028847	0.0980839	-0.252423				0.00786859	0.159905	0.0348941
-19.2528	0.135663	-0.138513	-0.219357	0.220585	0.0229831	0.315483	0.12182	-0.18904	-0.0714488	-0.127101	-0.150037	0.271513	-0.0516656	-0.0847562	0.0347268	0.0465801	0.176335	0.0275127	0.0275127	0.101834	-0.257794				0.0101351	0.157812	0.0344374
-19.1545	0.14486	-0.124473	-0.215473	0.203417	0.0470717	0.315425	0.122281	-0.198831	-0.0701032	-0.122868	-0.133968	0.275952	-0.0287565	-0.0849895	0.0550035	0.0280242	0.164602	0.0276877	0.0276877	0.105538	-0.261722				0.0131602	0.156003	0.0340427
-19.0562	0.147351	-0.111648	-0.21241	0.188465	0.0695802	0.311191	0.124975	-0.201292	-0.0715865	-0.121795	-0.119339	0.284456	-0.0055263	-0.0860283	0.0760949	0.0130457	0.149565	0.0268125	0.0268125	0.110758	-0.26716				0.0158248	0.154816	0.0337837
-18.9579	0.149115	-0.0985671	-0.207424	0.175235	0.0902396	0.30874	0.132536	-0.198669	-0.0757212	-0.121091	-0.109071	0.288514	0.019077	-0.0867363	0.0948263	0.00129896	0.133209	0.0261367	0.0261367	0.117331	-0.274657				0.0185933	0.154249	0.03366
-18.8596	0.148291	-0.0871621	-0.205024	0.165383	0.108448	0.30452	0.140558	-0.199071	-0.0802627	-0.118601	-0.0989008	0.289656	0.0426196	-0.0879949	0.111156	-0.00791365	0.115873	0.0215953	0.0215953	0.124414	-0.281964				0.0203436	0.154253	0.0336607
-18.7613	0.147357	-0.0795676	-0.2066	0.153489	0.123503	0.300171	0.14703	-0.200057	-0.0837787	-0.120599	-0.0934323	0.289985	0.064863	-0.093002	0.126527	-0.0193337	0.0986508	0.0224075	0.0224075	0.131124	-0.288473				0.0210797	0.155337	0.0338973
-18.663	0.145706	-0.0714127	-0.202886	0.141101	0.138086	0.295384	0.155058	-0.198518	-0.089284	-0.121274	-0.087068	0.288845	0.0849912	-0.10255	0.139722	-0.0297296	0.0828201	0.0223202	0.0223202	0.13358	-0.293133				0.0216229	0.155964	0.0340341
-18.5647	0.145899	-0.0646722	-0.197372	0.132643	0.152671	0.291461	0.163188	-0.19649	-0.0916444	-0.121998	-0.0786801	0.285256	0.102887	-0.107594	0.150252	-0.0386372	0.0694657	0.0176351	0.0176351	0.133153	-0.294745				0.0223959	0.156161	0.034077
-18.4664	0.145846	-0.0580288	-0.188533	0.124382	0.163901	0.288426	0.171851	-0.198661	-0.0955929	-0.127303	-0.0723782	0.278222	0.115366	-0.113013	0.16007	-0.0474053	0.0602731	0.017614	0.017614	0.129078	-0.300564				0.0224364	0.156955	0.0342503
-18.3681	0.14474	-0.0516644	-0.176128	0.116765	0.170253	0.28472	0.183718	-0.20437	-0.101589	-0.129195	-0.0675753	0.269613	0.124665	-0.123081	0.167622	-0.0578972	0.0456713	0.0199339	0.0199339	0.122063	-0.309715				0.0213563	0.15802	0.0344829
-18.2698	0.14234	-0.0473598	-0.163935	0.111725	0.176055	0.281261	0.199947	-0.208305	-0.105787	-0.1296	-0.0650112	0.260023	0.130678	-0.131202	0.172939	-0.0680178	0.0308351	0.0256702	0.0256702	0.118013	-0.313592				0.0210641	0.158745	0.0346411
-18.1715	0.139821	-0.0433481	-0.149609	0.107407	0.180826	0.275211	0.212134	-0.208352	-0.107379	-0.130157	-0.0625986	0.24816	0.131051	-0.13536	0.17904	-0.0755962	0.0219717	0.0346799	0.0346799	0.11477	-0.317824				0.0214062	0.158398	0.0345653
-18.0732	0.138039	-0.03342	-0.134513	0.108494	0.182397	0.270606	0.22528	-0.206195	-0.107527	-0.125718	-0.0564996	0.233142	0.134757	-0.14256	0.184654	-0.082431	0.0129914	0.0425548	0.0425548	0.109196	-0.320006				0.022657	0.157575	0.0343857
-17.9749	0.135784	-0.0196059	-0.114769	0.10888	0.186417	0.266354	0.233666	-0.197922	-0.106444	-0.119242	-0.0500684	0.213959	0.136024	-0.140673	0.189943	-0.0885775	0.00799674	0.0467784	0.0467784	0.107333	-0.320404				0.024867	0.155073	0.0338397
-17.8766	0.129831	-0.00390401	-0.0957069	0.107187	0.186466	0.263757	0.243601	-0.189553	-0.10532	-0.11219	-0.0471024	0.196913	0.139562	-0.136644	0.195699	-0.0965916	0.00308927	0.0568234	0.0568234	0.109411	-0.32394				0.0275339	0.153535	0.0335041
-17.7783	0.12126	0.0127773	-0.0821228	0.10571	0.185649	0.260724	0.250612	-0.182943	-0.102308	-0.106092	-0.045977	0.178391	0.139958	-0.132127	0.197782	-0.104121	-0.000193202	0.0668323	0.0668323	0.112543	-0.32268				0.0295479	0.15143	0.0330448
-17.68	0.113229	0.0284139	-0.0648195	0.10487	0.183099	0.25335	0.257486	-0.171972	-0.0964071	-0.103103	-0.0467101	0.161067	0.137077	-0.124778	0.200393	-0.110236	-0.000958818	0.0718774	0.0718774	0.114364	-0.320843				0.0312989	0.14847	0.0323988
-17.5817	0.103257	0.0421133	-0.0439949	0.102048	0.181882	0.244589	0.265395	-0.159548	-0.0872121	-0.101574	-0.0481198	0.144927	0.128564	-0.117131	0.200201	-0.117239	0.000989311	0.0766021	0.0766021	0.114813	-0.317194				0.0328556	0.145038	0.0316499
-17.4834	0.0941575	0.0519613	-0.0273264	0.0999415	0.180205	0.237252	0.272165	-0.143305	-0.0748103	-0.102885	-0.0512236	0.128356	0.118304	-0.11095	0.196905	-0.124461	0.00572192	0.0785357	0.0785357	0.111584	-0.312042				0.0336486	0.14141	0.0308583
-17.3851	0.0866075	0.061534	-0.00641418	0.0958156	0.171839	0.229816	0.277606	-0.120413	-0.061282	-0.101425	-0.0551725	0.11354	0.111698	-0.103996	0.190968	-0.132001	0.00731511	0.0779147	0.0779147	0.107025	-0.313924				0.034046	0.137916	0.0300957
-17.2868	0.0824781	0.0687895	0.0148986	0.0919606	0.157995	0.216475	0.279076	-0.0975058	-0.0460108	-0.0963605	-0.058116	0.0968912	0.104647	-0.0950612	0.182049	-0.138466	0.0147064	0.0758814	0.0758814	0.105292	-0.319736				0.034084	0.133907	0.0292209
-17.1885	0.075682	0.0752979	0.0358848	0.0880817	0.142743	0.199319	0.276474	-0.0761365	-0.0267926	-0.0926906	-0.0641434	0.0821634	0.095535	-0.0896272	0.170787	-0.143823	0.0279879	0.0709844	0.0709844	0.106327	-0.325547				0.0333091	0.129985	0.028365
-17.0902	0.0676385	0.0826447	0.057179	0.0820729	0.127084	0.185328	0.267674	-0.060907	-0.00941054	-0.0861008	-0.0706642	0.0683512	0.0835922	-0.0852328	0.158651	-0.148536	0.0417049	0.0680967	0.0680967	0.106638	-0.330513				0.0320661	0.126482	0.0276006
-16.9918	0.062692	0.0905409	0.0798457	0.0748153	0.111743	0.173342	0.257862	-0.0529526	0.0125919	-0.0768834	-0.0754717	0.0531187	0.0710745	-0.0819495	0.14378	-0.152019	0.0528829	0.0677353	0.0677353	0.104557	-0.331755				0.0311088	0.123194	0.0268831
-16.8935	0.0594344	0.0963524	0.0990263	0.0674618	0.0959738	0.160658	0.247855	-0.0493555	0.0397136	-0.0685182	-0.0775029	0.0440842	0.0605434	-0.0784962	0.126817	-0.154547	0.0683201	0.0678918	0.0678918	0.104283	-0.333174				0.0307006	0.120723	0.0263438
-16.7952	0.0541867	0.105605	0.121176	0.0565545	0.0795199	0.148727	0.241232	-0.0426999	0.0659299	-0.0660516	-0.0776518	0.0368049	0.0540441	-0.0781137	0.110732	-0.161121	0.0829644	0.0713049	0.0713049	0.10185	-0.33527				0.0305252	0.120323	0.0262567
-16.6969	0.0457488	0.120363	0.145394	0.0473603	0.0649889	0.135081	0.236574	-0.0347727	0.0921877	-0.063574	-0.0741885	0.029882	0.0520443	-0.0768828	0.0937668	-0.164686	0.0982006	0.0706671	0.0706671	0.0992913	-0.340464				0.0308404	0.121207	0.0264494
-16.5986	0.038443	0.135838	0.165892	0.0376429	0.0496935	0.120609	0.230316	-0.0298801	0.11862	-0.0618138	-0.072797	0.0259616	0.0496303	-0.0705365	0.0780919	-0.165888	0.11146	0.0693099	0.0693099	0.098914	-0.345451				0.0311127	0.122584	0.0267501
-16.5003	0.0319474	0.152437	0.184632	0.0254853	0.0353864	0.104614	0.222483	-0.0262685	0.141559	-0.0567531	-0.072989	0.0245012	0.0480923	-0.0668928	0.0614759	-0.170305	0.122725	0.0726166	0.0726166	0.103245	-0.35022				0.0314471	0.125032	0.0272842
-16.402	0.0226031	0.168428	0.201922	0.0120427	0.0242915	0.0892391	0.212082	-0.0206153	0.162851	-0.0499499	-0.0732472	0.022682	0.0513321	-0.0617249	0.0434353	-0.171603	0.139119	0.0697095	0.0697095	0.109377	-0.350206				0.0319751	0.126987	0.0277108
-16.3037	0.0131858	0.183569	0.213392	-0.00103771	0.0151165	0.0751467	0.198046	-0.0134554	0.181404	-0.0436625	-0.0751016	0.0198533	0.0551473	-0.0580994	0.0236938	-0.171155	0.157062	0.0672091	0.0672091	0.117548	-0.347375				0.0322713	0.128754	0.0280964
-16.2054	0.00219277	0.198469	0.22422	-0.0137999	0.00845452	0.0591462	0.180656	-0.00429608	0.198823	-0.0377047	-0.075099	0.0184914	0.0619796	-0.05477	0.0029894	-0.168255	0.173062	0.0645012	0.0645012	0.122541	-0.349517				0.0322184	0.131263	0.028644
-16.1071	-0.00945277	0.211158	0.232099	-0.0269116	0.00145016	0.0437535	0.166864	0.00301761	0.215868	-0.0337548	-0.0755814	0.0186471	0.0693772	-0.055164	-0.0191932	-0.165161	0.188971	0.0617432	0.0617432	0.126002	-0.354366				0.0314814	0.134928	0.0294437
-16.0088	-0.0202978	0.213619	0.23714	-0.0433631	-0.00696459	0.0282746	0.151471	0.00803364	0.228373	-0.0325731	-0.0769554	0.0224821	0.0768952	-0.0543123	-0.0411622	-0.163533	0.199683	0.0605197	0.0605197	0.132071	-0.360609				0.0294911	0.13825	0.0301687
-15.9105	-0.0300973	0.214469	0.236468	-0.062072	-0.0189489	0.00983352	0.136254	0.0102235	0.240172	-0.0286654	-0.0797749	0.0302878	0.0875992	-0.0603132	-0.0642809	-0.162778	0.205621	0.0592091	0.0592091	0.132609	-0.368247				0.0260369	0.141719	0.0309256
-15.8122	-0.0390056	0.213906	0.237203	-0.0801954	-0.0301015	-0.0103317	0.123098	0.009322	0.249665	-0.0266329	-0.0789704	0.0349042	0.0959067	-0.0645575	-0.089547	-0.15731	0.206026	0.0560218	0.0560218	0.132692	-0.374877				0.0220589	0.144667	0.0315689
-15.7139	-0.0461683	0.210038	0.239082	-0.0987825	-0.0384203	-0.0303823	0.108401	0.0136249	0.256212	-0.0276054	-0.0748931	0.0395934	0.106131	-0.0672472	-0.110491	-0.152131	0.205259	0.0552028	0.0552028	0.133865	-0.387587				0.0185192	0.148226	0.0323456
-15.6156	-0.0552176	0.203835	0.233536	-0.117889	-0.0422071	-0.0469178	0.089804	0.0139858	0.262111	-0.0261136	-0.0713363	0.0461107	0.118078	-0.0729895	-0.13324	-0.148755	0.203	0.057702	0.057702	0.135528	-0.400624				0.0145763	0.151705	0.0331047
-15.5173	-0.0636656	0.199045	0.220141	-0.134329	-0.0453008	-0.0632516	0.0710544	0.01217	0.266795	-0.0221808	-0.067487	0.0511282	0.133927	-0.082301	-0.153344	-0.141661	0.197289	0.0598698	0.0598698	0.136032	-0.415149				0.0104119	0.154801	0.0337803
-15.419	-0.0709863	0.192597	0.20797	-0.150189	-0.0478145	-0.0795738	0.0534025	0.00976151	0.269745	-0.0152686	-0.0616081	0.0533225	0.15015	-0.0917094	-0.170128	-0.131965	0.19103	0.0595792	0.0595792	0.137303	-0.424461				0.00670171	0.157075	0.0342765
-15.3207	-0.0753785	0.181214	0.188923	-0.162503	-0.0424793	-0.0954995	0.0387972	0.00184071	0.27159	-0.0110519	-0.0565607	0.0528059	0.16077	-0.0997834	-0.182977	-0.121766	0.183649	0.062232	0.062232	0.138975	-0.425859				0.00329383	0.1572	0.0343039
-15.2224	-0.0809405	0.173161	0.169814	-0.172428	-0.0337991	-0.107182	0.0275467	-0.00723185	0.272187	-0.00944454	-0.0500458	0.0528399	0.169639	-0.106319	-0.192334	-0.110129	0.171692	0.0664317	0.0664317	0.140662	-0.425769				0.000703945	0.156841	0.0342254
-15.1241	-0.0853708	0.165061	0.153265	-0.178631	-0.0238727	-0.116045	0.0179709	-0.0172397	0.266989	-0.00673527	-0.0400053	0.0537091	0.179908	-0.113119	-0.1991	-0.0993764	0.155771	0.0704318	0.0704318	0.139977	-0.42868				-0.0016505	0.156231	0.0340924
-15.0258	-0.0885666	0.152236	0.136068	-0.182625	-0.0138513	-0.126101	0.0176853	-0.0266692	0.262032	-0.00330141	-0.0303553	0.0541028	0.191561	-0.122487	-0.204411	-0.0902531	0.138055	0.0716292	0.0716292	0.140853	-0.429564				-0.00392066	0.155459	0.0339238
-14.9275	-0.0929215	0.137044	0.119114	-0.187312	-0.00264015	-0.135265	0.0179806	-0.0315735	0.251688	-0.000753528	-0.0221099	0.0532602	0.198816	-0.128698	-0.208392	-0.0810884	0.123795	0.0701224	0.0701224	0.142434	-0.433121				-0.00664282	0.154488	0.0337119
-14.8292	-0.0972425	0.125589	0.105552	-0.193681	0.0123067	-0.144085	0.0157668	-0.034282	0.235864	0.00216752	-0.0136099	0.0477711	0.203827	-0.133519	-0.208486	-0.0734203	0.103106	0.0696802	0.0696802	0.139716	-0.433528				-0.0095631	0.152509	0.0332802
-14.7309	-0.0985054	0.11091	0.0899505	-0.197007	0.0287132	-0.151301	0.00969473	-0.0376668	0.221745	0.00928919	-0.0074825	0.0434876	0.204643	-0.135587	-0.206647	-0.0630872	0.0844679	0.0681856	0.0681856	0.138531	-0.430882				-0.011922	0.149696	0.0326663
-14.6326	-0.0978147	0.0928934	0.0743914	-0.201554	0.0448374	-0.156903	0.0043965	-0.0409279	0.208016	0.0164921	-0.00365516	0.042192	0.198915	-0.137625	-0.203324	-0.0544566	0.0651151	0.0679859	0.0679859	0.138289	-0.42768				-0.0144015	0.146709	0.0320145
-14.5342	-0.0977104	0.0736098	0.0583806	-0.206421	0.0609188	-0.162339	0.00216041	-0.0429433	0.192308	0.0239696	0.00168026	0.0401355	0.193983	-0.144339	-0.200651	-0.0476113	0.0411929	0.0701637	0.0701637	0.135143	-0.425729				-0.0173302	0.144388	0.031508
-14.4359	-0.102199	0.0523919	0.0429697	-0.208659	0.0753992	-0.165334	0.00568079	-0.0469463	0.177359	0.029496	0.00998374	0.03935	0.18548	-0.153709	-0.194257	-0.0365889	0.0158606	0.0710927	0.0710927	0.128679	-0.428403				-0.0205362	0.142511	0.0310985
-14.3376	-0.0996694	0.0298769	0.0261359	-0.209677	0.0855186	-0.169587	0.0129708	-0.0530983	0.166409	0.0339238	0.0200726	0.0390089	0.173464	-0.161198	-0.185555	-0.0278569	-0.0150069	0.0774316	0.0774316	0.122959	-0.432266				-0.023272	0.14132	0.0308386
-14.2393	-0.0951789	0.0084974	0.0143961	-0.210826	0.0958908	-0.173798	0.0218464	-0.0576775	0.159857	0.0354365	0.0304842	0.0431706	0.167136	-0.164003	-0.174488	-0.0204794	-0.0489524	0.0796078	0.0796078	0.116511	-0.435982				-0.0251877	0.141033	0.0307758
-14.141	-0.086944	-0.0118093	0.0033368	-0.213881	0.101926	-0.177588	0.0324398	-0.0626842	0.150876	0.0362568	0.0401122	0.0486124	0.157001	-0.167825	-0.162358	-0.0146796	-0.0813628	0.0759861	0.0759861	0.110601	-0.43739				-0.0277804	0.14029	0.0306138
-14.0427	-0.0786214	-0.0322329	-0.00689337	-0.218289	0.108408	-0.180787	0.0397112	-0.0670953	0.141173	0.037839	0.0499309	0.0550789	0.149202	-0.168464	-0.14966	-0.0083215	-0.117118	0.0708489	0.0708489	0.104865	-0.435122				-0.0302238	0.139784	0.0305033
-13.9444	-0.0732582	-0.0450589	-0.0163086	-0.221947	0.119684	-0.183733	0.0477526	-0.0689914	0.136012	0.0384862	0.0587157	0.0609272	0.138607	-0.170177	-0.135616	0.000767768	-0.14959	0.0656532	0.0656532	0.0961201	-0.432041				-0.0318258	0.139962	0.0305422
-13.8461	-0.0675133	-0.0592402	-0.0216198	-0.222518	0.134011	-0.182886	0.0603267	-0.0718635	0.129029	0.0322738	0.067911	0.0646996	0.125419	-0.169107	-0.119428	0.011571	-0.179262	0.0649679	0.0649679	0.0901751	-0.424653				-0.0320352	0.139891	0.0305267
-13.7478	-0.0584596	-0.0736304	-0.0248054	-0.223882	0.150117	-0.179507	0.0720522	-0.0715923	0.122236	0.0277169	0.0739342	0.0719949	0.115156	-0.171082	-0.100223	0.0183846	-0.200583	0.06378	0.06378	0.0844052	-0.416666				-0.0312798	0.14015	0.0305832
-13.6495	-0.0486453	-0.0858801	-0.0255615	-0.225305	0.16207	-0.173746	0.085111	-0.0765111	0.115091	0.0274732	0.0780334	0.0826378	0.10354	-0.173963	-0.0858144	0.0258927	-0.218749	0.0616084	0.0616084	0.0725236	-0.406939				-0.0307393	0.140256	0.0306063
-13.5512	-0.0353179	-0.0950959	-0.0222741	-0.22476	0.172245	-0.168598	0.10322	-0.0781355	0.104025	0.025252	0.0837805	0.0906503	0.0891303	-0.17155	-0.0696941	0.0328227	-0.235035	0.0594314	0.0594314	0.0607974	-0.399164				-0.0294685	0.140282	0.030612
-13.4529	-0.0220126	-0.106562	-0.013387	-0.223283	0.181866	-0.163829	0.1227	-0.0786901	0.0930348	0.0222029	0.088205	0.100335	0.0728224	-0.165888	-0.055564	0.0389449	-0.24625	0.0575655	0.0575655	0.0529034	-0.394706				-0.0277155	0.140947	0.0307571
-13.3546	-0.0105885	-0.115803	-0.00322186	-0.221829	0.188182	-0.157972	0.143192	-0.0824432	0.0818823	0.0177557	0.0900249	0.113546	0.0554608	-0.158167	-0.0455726	0.0414174	-0.258129	0.0607149	0.0607149	0.0421669	-0.393749				-0.0263056	0.142528	0.0311022
-13.2563	-0.00144539	-0.120196	0.0118218	-0.222907	0.190981	-0.149325	0.159678	-0.0830522	0.0702378	0.0163611	0.0910846	0.129223	0.0412731	-0.14838	-0.0371239	0.0423547	-0.266713	0.0613569	0.0613569	0.0313189	-0.393217				-0.0245386	0.143784	0.0313763
-13.158	0.00880461	-0.125835	0.0267689	-0.225824	0.190587	-0.140443	0.174916	-0.0807861	0.0581649	0.0150936	0.090659	0.144893	0.0284862	-0.139889	-0.0295659	0.042564	-0.272185	0.0592957	0.0592957	0.0196669	-0.395331				-0.0233649	0.145244	0.0316948
-13.0597	0.0205211	-0.132662	0.037817	-0.23125	0.188126	-0.132145	0.191347	-0.0770246	0.0491463	0.00852232	0.0888034	0.159681	0.0164061	-0.130425	-0.0245566	0.0416984	-0.27581	0.0569115	0.0569115	0.009708	-0.395683				-0.0225693	0.146764	0.0320265
-12.9614	0.0353258	-0.135771	0.0488098	-0.23704	0.184256	-0.123449	0.202952	-0.0695326	0.0389939	0.00106391	0.0865398	0.172924	0.00447045	-0.116499	-0.0200407	0.0415153	-0.277257	0.0517224	0.0517224	-0.00448797	-0.400886				-0.022127	0.148126	0.0323237
-12.8631	0.0516324	-0.135779	0.0570789	-0.240906	0.178701	-0.115647	0.215827	-0.0630515	0.0327025	-0.0058548	0.0846907	0.187011	-2.05598e-05	-0.102987	-0.0137772	0.0382376	-0.279007	0.0493413	0.0493413	-0.0176453	-0.40409				-0.0206763	0.149778	0.0326843
-12.7648	0.0676636	-0.140811	0.0629848	-0.241044	0.168638	-0.109146	0.230297	-0.0561028	0.0284891	-0.0131393	0.0797247	0.202895	-0.00477146	-0.0868438	-0.00953284	0.0346431	-0.278229	0.0481535	0.0481535	-0.0264987	-0.405473				-0.0190452	0.151173	0.0329886
-12.6665	0.0833204	-0.146141	0.0675759	-0.241806	0.156054	-0.103426	0.244593	-0.0493747	0.0222289	-0.0205254	0.0746248	0.215592	-0.00725868	-0.0717929	-0.00628146	0.0323644	-0.281778	0.0441878	0.0441878	-0.0355621	-0.409504				-0.0185105	0.153215	0.0334343
-12.5682	0.102437	-0.151455	0.0682715	-0.240088	0.143527	-0.0968203	0.258136	-0.0433334	0.0140544	-0.0274636	0.0698367	0.223517	-0.00755796	-0.0548206	-0.00289973	0.0333664	-0.286481	0.0395151	0.0395151	-0.0426121	-0.410904				-0.0177267	0.154834	0.0337876
-12.4699	0.122519	-0.15615	0.0710246	-0.235506	0.130658	-0.0894751	0.269809	-0.0337016	0.00655643	-0.0369618	0.0639044	0.231142	-0.00834211	-0.0325582	0.000548343	0.0343466	-0.284445	0.0308807	0.0308807	-0.0485907	-0.410317				-0.0163704	0.155541	0.0339417
-12.3716	0.145051	-0.159517	0.0733694	-0.231437	0.117656	-0.0834226	0.276529	-0.0211748	0.00230959	-0.0476715	0.0540567	0.236802	-0.00513485	-0.00617382	0.0030449	0.0325316	-0.282028	0.0209839	0.0209839	-0.0576255	-0.403908				-0.0149893	0.15549	0.0339308
-12.2733	0.161823	-0.159817	0.0748502	-0.226373	0.106718	-0.0770769	0.282701	-0.00607449	-0.00502078	-0.0544308	0.0426778	0.24273	0.00265477	0.0173924	0.00399218	0.0351643	-0.278774	0.00966717	0.00966717	-0.069393	-0.395625				-0.0134547	0.155316	0.0338928
-12.175	0.176094	-0.161142	0.0729614	-0.22177	0.0962372	-0.0722295	0.290593	0.00515414	-0.0157038	-0.0572404	0.0321631	0.244718	0.0046341	0.040002	0.00445333	0.041259	-0.270753	0.00437492	0.00437492	-0.0815877	-0.389508				-0.0120435	0.155363	0.033903
-12.0766	0.188967	-0.165843	0.0683574	-0.217148	0.086954	-0.06341	0.29661	0.0130007	-0.0235704	-0.0590018	0.0210442	0.244395	0.00896088	0.0658487	0.00499171	0.0479486	-0.261887	0.00620895	0.00620895	-0.0949712	-0.383026				-0.00996955	0.155536	0.0339407
-11.9783	0.204919	-0.16901	0.0649018	-0.209435	0.0802195	-0.0531902	0.302044	0.0196559	-0.03099	-0.0590968	0.00967645	0.242767	0.014296	0.0901195	0.00517026	0.0543468	-0.250855	0.00681387	0.00681387	-0.110516	-0.375983				-0.00749203	0.155796	0.0339975
-11.88	0.221854	-0.174406	0.0615976	-0.2016	0.0692035	-0.0455193	0.306373	0.0242738	-0.037816	-0.0552629	-0.000908117	0.238119	0.0226409	0.115249	0.00474473	0.057493	-0.24064	0.00654138	0.00654138	-0.124316	-0.369948				-0.00551351	0.156352	0.0341189
-11.7817	0.240767	-0.179166	0.0535263	-0.196402	0.0539065	-0.0391627	0.306349	0.0272752	-0.0434846	-0.0480248	-0.0112014	0.231509	0.0332519	0.140869	0.0031353	0.0608528	-0.231628	0.0033692	0.0033692	-0.134849	-0.364768				-0.00430983	0.157003	0.0342608
-11.6834	0.256294	-0.184434	0.0404324	-0.190157	0.0373841	-0.0370012	0.302703	0.0277858	-0.0502495	-0.0423203	-0.0198659	0.221515	0.0414184	0.167148	0.000472369	0.0655678	-0.227022	-0.00372575	-0.00372575	-0.145317	-0.355811				-0.00470993	0.157241	0.0343127
-11.5851	0.272605	-0.190042	0.0217701	-0.18689	0.0244534	-0.0369642	0.297089	0.0312886	-0.0579363	-0.0391736	-0.027145	0.206978	0.0500555	0.192259	0.00298603	0.0702062	-0.222121	-0.0124003	-0.0124003	-0.148846	-0.344995				-0.0052011	0.157384	0.034344
-11.4868	0.283453	-0.196221	0.00275134	-0.185782	0.00822713	-0.0368992	0.288283	0.0357062	-0.0619915	-0.0342483	-0.0359912	0.191123	0.0603753	0.212605	0.0067559	0.07611	-0.219414	-0.0225951	-0.0225951	-0.151099	-0.326237				-0.00608012	0.156503	0.0341517
-11.3885	0.293122	-0.20018	-0.0136831	-0.185549	-0.0111208	-0.0358636	0.2782	0.0404609	-0.0685634	-0.0304674	-0.0429906	0.174114	0.072435	0.231054	0.0103863	0.0811459	-0.21933	-0.0333701	-0.0333701	-0.154113	-0.302727				-0.00716231	0.155658	0.0339674
-11.2902	0.305177	-0.205836	-0.0313054	-0.184135	-0.0285707	-0.0360629	0.263748	0.0483452	-0.0770944	-0.028478	-0.0487832	0.154078	0.0837885	0.248344	0.015803	0.0878246	-0.217895	-0.0435784	-0.0435784	-0.151174	-0.274251				-0.00779207	0.154612	0.0337392
-11.1919	0.316488	-0.21158	-0.0518389	-0.18101	-0.0451216	-0.0382381	0.251277	0.0535573	-0.0846961	-0.0297522	-0.0529088	0.132778	0.0939986	0.262641	0.0201585	0.0963277	-0.216076	-0.0526895	-0.0526895	-0.151098	-0.246453				-0.00890126	0.154307	0.0336726
-11.0936	0.325682	-0.216069	-0.0719758	-0.176776	-0.0598827	-0.0434654	0.236918	0.0563339	-0.0921196	-0.0303131	-0.0576192	0.111735	0.105212	0.275863	0.024357	0.103606	-0.210401	-0.0573058	-0.0573058	-0.151695	-0.21682				-0.00962096	0.153776	0.0335566
-10.9953	0.331424	-0.217274	-0.090667	-0.17202	-0.0745923	-0.0496969	0.22044	0.0581534	-0.0991869	-0.0268386	-0.0611397	0.0895888	0.115419	0.286674	0.0293045	0.112528	-0.205943	-0.0601156	-0.0601156	-0.150862	-0.181942				-0.00985058	0.152703	0.0333226
-10.897	0.332134	-0.217061	-0.109978	-0.167844	-0.0886121	-0.0581206	0.202405	0.0557892	-0.105123	-0.0271056	-0.0634742	0.069431	0.124541	0.29496	0.0349641	0.122259	-0.205084	-0.0585849	-0.0585849	-0.14588	-0.146168				-0.0102446	0.151451	0.0330494
-10.7987	0.331663	-0.215993	-0.127495	-0.164535	-0.102793	-0.0672715	0.181423	0.0518461	-0.110409	-0.0289747	-0.066176	0.0490091	0.131228	0.30158	0.0398155	0.136491	-0.205206	-0.0580003	-0.0580003	-0.141012	-0.110069				-0.0110894	0.150733	0.0328925
-10.7004	0.328887	-0.20989	-0.142348	-0.161556	-0.114348	-0.0717223	0.162653	0.0462951	-0.114662	-0.0300347	-0.0671322	0.0280045	0.136834	0.302608	0.0434714	0.151725	-0.202948	-0.0621974	-0.0621974	-0.13341	-0.0800764				-0.012002	0.149612	0.032648
-10.6021	0.324062	-0.201953	-0.154647	-0.160002	-0.12265	-0.0762981	0.147939	0.0409806	-0.115512	-0.030143	-0.0675795	0.00958609	0.138825	0.304656	0.0442103	0.163218	-0.198735	-0.0631106	-0.0631106	-0.127624	-0.052325				-0.012391	0.148421	0.0323881
-10.5038	0.313597	-0.191013	-0.162935	-0.158716	-0.133663	-0.0826441	0.131561	0.0376388	-0.114736	-0.0282357	-0.0694222	-0.00573235	0.142324	0.302785	0.0424329	0.171183	-0.191518	-0.0613119	-0.0613119	-0.125999	-0.0247065				-0.0128773	0.146229	0.0319098
-10.4055	0.300543	-0.177784	-0.171254	-0.156094	-0.143855	-0.0878639	0.112469	0.0308103	-0.111447	-0.0211677	-0.069837	-0.0215848	0.146226	0.29754	0.0404047	0.181407	-0.186973	-0.0552206	-0.0552206	-0.122209	0.00404054				-0.0127175	0.14358	0.0313316
-10.3072	0.28759	-0.165655	-0.179647	-0.155347	-0.149941	-0.0929747	0.0930946	0.0246225	-0.110754	-0.0103542	-0.0658905	-0.0365599	0.148667	0.292534	0.0354574	0.191838	-0.1804	-0.0450419	-0.0450419	-0.112867	0.0311328				-0.0116922	0.141115	0.0307938
-10.2089	0.276875	-0.157478	-0.18413	-0.156617	-0.155194	-0.0968136	0.0705535	0.015962	-0.108432	-0.00107659	-0.0599578	-0.0488822	0.146065	0.2873	0.029559	0.197829	-0.17134	-0.0368856	-0.0368856	-0.100852	0.0587406				-0.0110315	0.138591	0.030243
-10.1106	0.264734	-0.14795	-0.184413	-0.158575	-0.164175	-0.10066	0.0483119	0.00945835	-0.103479	0.00724705	-0.0533542	-0.0599431	0.145848	0.280035	0.0229341	0.202303	-0.164809	-0.032483	-0.032483	-0.0890774	0.0871504				-0.0106372	0.136523	0.0297917
-10.0123	0.250652	-0.137108	-0.180395	-0.15786	-0.174376	-0.106653	0.0280165	0.00865038	-0.100089	0.015774	-0.044319	-0.071257	0.146629	0.267791	0.0173768	0.204925	-0.157973	-0.0339091	-0.0339091	-0.0766721	0.114747				-0.0104742	0.13426	0.029298
-9.91396	0.233502	-0.125754	-0.178531	-0.1579	-0.187512	-0.115735	0.0116934	0.00925703	-0.0967063	0.0229483	-0.0348718	-0.0842564	0.145084	0.254974	0.0119523	0.206752	-0.149599	-0.0327953	-0.0327953	-0.0620868	0.136893				-0.0107375	0.132336	0.0288781
-9.81565	0.215931	-0.112835	-0.177081	-0.15702	-0.1998	-0.121625	-0.00358354	0.0113785	-0.0953959	0.0277698	-0.0251136	-0.0940686	0.140757	0.241959	0.0067925	0.210206	-0.139099	-0.0287402	-0.0287402	-0.0444055	0.160029				-0.0101278	0.130675	0.0285156
-9.71735	0.193832	-0.0996281	-0.168267	-0.155163	-0.208787	-0.127403	-0.0183077	0.0197213	-0.0933331	0.0363461	-0.0165537	-0.0993035	0.133209	0.227382	0.00165385	0.212791	-0.129187	-0.0264259	-0.0264259	-0.0319625	0.178503				-0.00939565	0.128071	0.0279475
-9.61905	0.172714	-0.082908	-0.156378	-0.15173	-0.217944	-0.128263	-0.0300068	0.0304573	-0.0898295	0.0450326	-0.00947151	-0.104366	0.123914	0.210915	-0.00605549	0.215026	-0.120586	-0.0179485	-0.0179485	-0.0245759	0.189795				-0.0081027	0.124897	0.0272547
-9.52074	0.148785	-0.0672346	-0.141667	-0.140577	-0.229477	-0.126493	-0.0372241	0.0394206	-0.084252	0.0552389	-0.00308544	-0.106716	0.115501	0.196718	-0.0178925	0.215563	-0.113073	-0.00689687	-0.00689687	-0.0199449	0.197062				-0.0063401	0.121446	0.0265016
-9.42244	0.129249	-0.0522044	-0.125631	-0.126536	-0.240073	-0.124643	-0.0432191	0.0447893	-0.0801334	0.0628475	0.00545423	-0.105237	0.108972	0.179622	-0.0331681	0.213958	-0.102511	0.006589	0.006589	-0.017983	0.196936				-0.00458724	0.117519	0.0256447
-9.32413	0.110149	-0.0357024	-0.115348	-0.11331	-0.247157	-0.122292	-0.0471664	0.0496038	-0.0708189	0.0702569	0.0136437	-0.102276	0.0999885	0.163663	-0.0478148	0.210741	-0.0923771	0.0236228	0.0236228	-0.0181137	0.194391				-0.00250916	0.113807	0.0248347
-9.22583	0.0880874	-0.0170007	-0.102135	-0.10094	-0.252923	-0.119065	-0.0465826	0.0500862	-0.05948	0.0804481	0.0221665	-0.097284	0.0928462	0.145186	-0.0624648	0.207594	-0.078512	0.0386064	0.0386064	-0.021124	0.182833				-0.000526237	0.109364	0.0238651
-9.12753	0.0647423	-0.00266536	-0.0870187	-0.0904682	-0.261818	-0.112525	-0.0461213	0.0530537	-0.0504921	0.0938686	0.0298884	-0.0926918	0.0857417	0.125779	-0.0748581	0.202572	-0.068789	0.0540309	0.0540309	-0.0225151	0.166865				0.000981387	0.105935	0.0231169
-9.02922	0.0423404	0.00986204	-0.07542	-0.0808744	-0.269407	-0.103586	-0.042735	0.0581802	-0.0424355	0.105775	0.0390812	-0.0882493	0.0767403	0.105559	-0.086874	0.200117	-0.0645237	0.0642218	0.0642218	-0.0198979	0.152621				0.00212939	0.103642	0.0226166
-8.93092	0.0212178	0.021887	-0.0610457	-0.0690082	-0.271623	-0.0922627	-0.0378329	0.0639734	-0.0363602	0.113804	0.0492848	-0.0829957	0.0654305	0.0892347	-0.0965413	0.195837	-0.0557696	0.0712039	0.0712039	-0.0202414	0.132413				0.00341949	0.100401	0.0219093
-8.83261	0.000248624	0.0317698	-0.0462504	-0.0558842	-0.272233	-0.0760579	-0.0295779	0.073081	-0.0301783	0.123821	0.0593479	-0.0785809	0.0552723	0.0741281	-0.105743	0.188507	-0.0439106	0.0787982	0.0787982	-0.0231091	0.114762				0.00557189	0.0978307	0.0213484
-8.73431	-0.0204517	0.0412076	-0.0326387	-0.0434894	-0.271719	-0.0583811	-0.0192624	0.0819986	-0.0258717	0.133966	0.0699692	-0.0737456	0.0419779	0.0589946	-0.116496	0.17925	-0.0264802	0.0821836	0.0821836	-0.0264844	0.0943004				0.00719102	0.0956233	0.0208667
-8.63601	-0.0377142	0.0517253	-0.0196825	-0.0359232	-0.27136	-0.044321	-0.0148775	0.0900189	-0.0219409	0.145024	0.080709	-0.068502	0.029139	0.0478964	-0.125773	0.170981	-0.0107926	0.0894274	0.0894274	-0.0370658	0.0733268				0.00855824	0.0956036	0.0208624
-8.5377	-0.0553746	0.0632259	-0.00768371	-0.028171	-0.270145	-0.0311026	-0.0138757	0.096042	-0.0239003	0.154314	0.0917776	-0.0649022	0.020803	0.0337406	-0.130564	0.164936	0.0061974	0.09571	0.09571	-0.0455436	0.0573314				0.00992979	0.0965525	0.0210695
-8.4394	-0.0716993	0.0730477	0.00384347	-0.0221268	-0.263608	-0.0165178	-0.0093582	0.0996589	-0.0284271	0.161288	0.105523	-0.0604075	0.010432	0.022959	-0.131909	0.158423	0.0230463	0.0955917	0.0955917	-0.0514006	0.0402739				0.0111536	0.0965994	0.0210797
-8.34109	-0.0857037	0.0799359	0.0139043	-0.0182614	-0.256084	-0.00267442	-0.00114192	0.104982	-0.0345192	0.165193	0.11843	-0.0549018	-0.000641617	0.0113773	-0.134596	0.147878	0.03886	0.0953117	0.0953117	-0.0575324	0.0188958				0.0116201	0.0968589	0.0211364
-8.24279	-0.101349	0.0891042	0.0248883	-0.0109683	-0.251828	0.0129706	0.0100279	0.107976	-0.0388878	0.165162	0.127582	-0.0508956	-0.0127797	-0.00572272	-0.13541	0.136865	0.0539337	0.0911814	0.0911814	-0.0694653	0.00185903				0.0112107	0.0978201	0.0213461
-8.14449	-0.117828	0.0997678	0.0340304	-0.00334139	-0.247881	0.0271902	0.0228783	0.113475	-0.0463853	0.162173	0.134561	-0.0488076	-0.0220075	-0.0217213	-0.133847	0.127605	0.0650563	0.0846359	0.0846359	-0.0818927	-0.0191539				0.0101497	0.0995596	0.0217257
-8.04618	-0.130242	0.10941	0.0366629	0.00539218	-0.24168	0.0435043	0.0304273	0.12217	-0.0572171	0.15849	0.139608	-0.0466749	-0.0317285	-0.0363558	-0.131713	0.117688	0.074217	0.079687	0.079687	-0.0909295	-0.0386376				0.00913164	0.101481	0.022145
-7.94788	-0.140353	0.121952	0.0352847	0.0125149	-0.231587	0.057531	0.0346585	0.125428	-0.0664309	0.152789	0.141828	-0.0436963	-0.0440675	-0.0492119	-0.130604	0.109585	0.0837288	0.0782623	0.0782623	-0.0983345	-0.0574822				0.00809791	0.103261	0.0225333
-7.84957	-0.15194	0.133936	0.0350918	0.0184871	-0.219915	0.0739126	0.0346934	0.127064	-0.0753736	0.147323	0.141922	-0.0386559	-0.0574045	-0.064532	-0.127464	0.100676	0.0903986	0.0750211	0.0750211	-0.104534	-0.0763377				0.00654242	0.10509	0.0229324
-7.75127	-0.164152	0.143219	0.0348605	0.0245132	-0.207391	0.0875867	0.0336249	0.123779	-0.0839257	0.141648	0.138512	-0.0367068	-0.0730683	-0.0806034	-0.123586	0.0897499	0.0982742	0.0695285	0.0695285	-0.117639	-0.0953562				0.00344742	0.107176	0.0233878
-7.65297	-0.175884	0.154027	0.029084	0.0306718	-0.196153	0.0972569	0.036228	0.115608	-0.0913233	0.129009	0.135139	-0.0388224	-0.0864964	-0.0950669	-0.118195	0.0787175	0.108813	0.0673794	0.0673794	-0.125715	-0.112197				0.000450454	0.109067	0.0238003
-7.55466	-0.187956	0.163001	0.024169	0.0352586	-0.186334	0.10332	0.0406344	0.107902	-0.097549	0.116739	0.133277	-0.0377257	-0.0956107	-0.10759	-0.10899	0.0690803	0.119758	0.0603757	0.0603757	-0.126854	-0.124058				-0.00184645	0.110228	0.0240537
-7.45636	-0.19859	0.171808	0.0232295	0.0352561	-0.176187	0.10611	0.0418878	0.100036	-0.103867	0.104382	0.132127	-0.0349804	-0.106479	-0.121098	-0.0980922	0.0626878	0.130331	0.050042	0.050042	-0.129269	-0.131151				-0.00437019	0.111318	0.0242916
-7.35805	-0.210337	0.180287	0.0216172	0.0343012	-0.162162	0.106834	0.0408837	0.0946779	-0.109591	0.0948947	0.127976	-0.032794	-0.119813	-0.125405	-0.0842524	0.057728	0.137577	0.0378385	0.0378385	-0.128455	-0.135192				-0.00645464	0.111571	0.0243467
-7.25975	-0.224236	0.187076	0.0240049	0.034115	-0.148409	0.105338	0.0352119	0.0900349	-0.122754	0.0868676	0.123654	-0.0316936	-0.132021	-0.130302	-0.068753	0.0516476	0.143263	0.0207006	0.0207006	-0.12601	-0.136213				-0.00941799	0.112154	0.024474
-7.16145	-0.236387	0.190269	0.0244193	0.0341216	-0.136829	0.101221	0.0268095	0.0900258	-0.135461	0.078934	0.116468	-0.0297567	-0.145618	-0.131432	-0.0533999	0.0454919	0.14739	0.00315332	0.00315332	-0.122346	-0.13135				-0.0124344	0.112288	0.0245033
-7.06314	-0.244693	0.197924	0.0252598	0.0352236	-0.119712	0.0928954	0.0177001	0.0897043	-0.144623	0.0677814	0.108553	-0.0273995	-0.158694	-0.131322	-0.0402468	0.0381759	0.155018	-0.0128975	-0.0128975	-0.116161	-0.124211				-0.0145058	0.112264	0.0244979
-6.96484	-0.252606	0.206224	0.0317188	0.0372762	-0.102322	0.0862893	0.00897491	0.0854881	-0.154715	0.055148	0.0987417	-0.0230115	-0.167968	-0.130249	-0.0267947	0.0280589	0.165323	-0.0266884	-0.0266884	-0.115595	-0.115919				-0.0161578	0.11298	0.0246542
-6.86653	-0.25947	0.212259	0.0363991	0.0357322	-0.0902544	0.0784131	-0.00169347	0.0810755	-0.164946	0.045783	0.0859026	-0.0190825	-0.174	-0.130975	-0.0142363	0.020423	0.170616	-0.0362216	-0.0362216	-0.11208	-0.105405				-0.0179991	0.113295	0.024723
-6.76823	-0.265185	0.220388	0.04302	0.0324536	-0.0787526	0.06578	-0.0109457	0.0775912	-0.175222	0.0368717	0.0730503	-0.015783	-0.179425	-0.131659	-0.00247134	0.0157915	0.177586	-0.0463115	-0.0463115	-0.107344	-0.0941988				-0.019575	0.114241	0.0249295
-6.66993	-0.272352	0.226564	0.0529878	0.0276339	-0.0645524	0.0502499	-0.0181576	0.0752711	-0.186813	0.0288881	0.0585303	-0.0140688	-0.179559	-0.130679	0.0116678	0.00805192	0.178036	-0.0504373	-0.0504373	-0.103499	-0.0779301				-0.0205051	0.114514	0.024989
-6.57162	-0.282705	0.227592	0.0607356	0.0269387	-0.0513645	0.0334658	-0.0198984	0.0727996	-0.199316	0.0190735	0.0434843	-0.0140261	-0.177123	-0.132994	0.0267875	-0.000784239	0.177257	-0.056191	-0.056191	-0.0936073	-0.0543374				-0.0214478	0.114919	0.0250774
-6.47332	-0.290155	0.227358	0.0690428	0.0257734	-0.0425553	0.016826	-0.0218257	0.0713895	-0.207516	0.00984383	0.0288218	-0.0141741	-0.176585	-0.131223	0.0410644	-0.0105931	0.177658	-0.062651	-0.062651	-0.0844697	-0.0319455				-0.0223127	0.11557	0.0252194
-6.37501	-0.295984	0.228887	0.0761771	0.0241876	-0.0360808	-0.0025818	-0.0269079	0.0702163	-0.213925	0.00197874	0.0132505	-0.0169163	-0.175279	-0.131405	0.0513698	-0.0179924	0.177674	-0.0640076	-0.0640076	-0.0756737	-0.0110236				-0.0232401	0.116455	0.0254125
-6.27671	-0.302493	0.231975	0.0829488	0.0219275	-0.0301485	-0.0228187	-0.0335157	0.0640256	-0.219911	-0.00427501	-0.00440767	-0.0193712	-0.172071	-0.129732	0.0635847	-0.0209467	0.180158	-0.0698453	-0.0698453	-0.065713	0.0123309				-0.0241973	0.118203	0.025794
-6.17841	-0.306236	0.232343	0.0879013	0.0142776	-0.0233107	-0.0442297	-0.0415087	0.0580374	-0.227957	-0.00922101	-0.0217048	-0.0214295	-0.167873	-0.121909	0.0771698	-0.0223231	0.18324	-0.073695	-0.073695	-0.0482699	0.0318327				-0.0246933	0.11967	0.0261141
-6.0801	-0.309764	0.23424	0.0919723	0.00843573	-0.017408	-0.0655943	-0.0491274	0.0513794	-0.230686	-0.014603	-0.0383362	-0.0251468	-0.166124	-0.115537	0.0878432	-0.0253053	0.189948	-0.0708426	-0.0708426	-0.0326038	0.0547169				-0.0244469	0.121786	0.0265759
-5.9818	-0.314274	0.237015	0.10057	0.00454499	-0.0102243	-0.0876743	-0.0521993	0.0378469	-0.229942	-0.0181587	-0.0550308	-0.0307417	-0.166688	-0.108311	0.0984573	-0.029626	0.203023	-0.0698873	-0.0698873	-0.0206217	0.0776619				-0.024007	0.125287	0.0273398
-5.88349	-0.316512	0.238877	0.110141	0.0006132	-0.00458393	-0.105007	-0.0516272	0.027072	-0.229426	-0.0198887	-0.0699072	-0.0364031	-0.165108	-0.0994792	0.108528	-0.0355021	0.213189	-0.0692491	-0.0692491	-0.0072146	0.101645				-0.0228139	0.128684	0.0280812
-5.78519	-0.316048	0.239898	0.119765	-0.00400208	-0.000641308	-0.124156	-0.0463101	0.0172824	-0.229124	-0.0216295	-0.0813233	-0.0414226	-0.163541	-0.0856419	0.116214	-0.0414077	0.224154	-0.0683441	-0.0683441	0.00350197	0.131353				-0.0209412	0.132359	0.028883
-5.68689	-0.313009	0.240985	0.130533	-0.0122433	0.00223545	-0.140438	-0.0362224	0.0157762	-0.229292	-0.0228729	-0.0870838	-0.0433686	-0.158125	-0.0695656	0.120899	-0.0439967	0.229524	-0.0680199	-0.0680199	0.0166765	0.161279				-0.0178262	0.135407	0.0295482
-5.58858	-0.307033	0.238457	0.140665	-0.0188854	0.00405471	-0.149481	-0.0310385	0.0173854	-0.232266	-0.0193898	-0.0893667	-0.0452572	-0.154692	-0.0570573	0.123295	-0.0465735	0.230896	-0.0673694	-0.0673694	0.0260709	0.193598				-0.0148265	0.13797	0.0301075
-5.49028	-0.301594	0.23395	0.147877	-0.0271766	0.00842215	-0.154641	-0.0293126	0.0149814	-0.23579	-0.0173653	-0.0912054	-0.0520424	-0.156086	-0.0438127	0.122928	-0.0528541	0.233807	-0.0635807	-0.0635807	0.0310541	0.227184				-0.0128018	0.140808	0.0307268
-5.39197	-0.294784	0.230841	0.149119	-0.0350535	0.0131368	-0.158627	-0.0275748	0.013774	-0.237542	-0.016952	-0.0933926	-0.0623187	-0.158069	-0.030639	0.121315	-0.0611091	0.237845	-0.0548055	-0.0548055	0.0378495	0.258068				-0.0106536	0.143404	0.0312932
-5.29367	-0.28743	0.228191	0.148643	-0.0439061	0.0164994	-0.161001	-0.0246136	0.010415	-0.235534	-0.0189205	-0.092989	-0.0756124	-0.160255	-0.024648	0.117532	-0.0702941	0.239839	-0.0443482	-0.0443482	0.0403955	0.287828				-0.00926467	0.145568	0.0317655
-5.19537	-0.274861	0.223664	0.14504	-0.0525257	0.0183951	-0.158128	-0.017195	0.00684953	-0.225202	-0.0194569	-0.0937545	-0.0880574	-0.162811	-0.0179796	0.11128	-0.0763066	0.246465	-0.0309603	-0.0309603	0.0395365	0.315319				-0.00674527	0.146454	0.031959
-5.09706	-0.264489	0.224885	0.139383	-0.0593135	0.0231602	-0.152251	-0.00766768	0.000995505	-0.213693	-0.0206086	-0.0901753	-0.102847	-0.163025	-0.0119965	0.10479	-0.0823481	0.249043	-0.0177962	-0.0177962	0.039729	0.341802				-0.00381998	0.147566	0.0322014
-4.99876	-0.256281	0.225762	0.130041	-0.0661341	0.0232524	-0.14577	0.00352752	-0.00820702	-0.203401	-0.0180668	-0.0853765	-0.116274	-0.162453	-0.00762588	0.0994736	-0.0829195	0.248282	-0.00775252	-0.00775252	0.0381716	0.372993				-0.00126246	0.149259	0.0325709
-4.90045	-0.247339	0.226087	0.117459	-0.0733112	0.0211707	-0.141563	0.0105763	-0.0146406	-0.188616	-0.00998651	-0.0799445	-0.132372	-0.16766	-0.00167499	0.093322	-0.0815882	0.245956	0.00468826	0.00468826	0.036599	0.397842				0.000937751	0.150473	0.0328358
-4.80215	-0.237692	0.22463	0.104243	-0.0780875	0.0209368	-0.13823	0.0174486	-0.0198957	-0.171078	-0.00108255	-0.0728841	-0.148431	-0.173887	0.00155242	0.0850454	-0.0829822	0.245283	0.0145662	0.0145662	0.0322279	0.423602				0.00285005	0.152133	0.0331981
-4.70385	-0.225428	0.218427	0.0883215	-0.0802266	0.0182985	-0.13272	0.0162628	-0.0258554	-0.151829	0.00863389	-0.0651465	-0.164261	-0.182054	0.00314811	0.0772061	-0.0841283	0.240122	0.0219809	0.0219809	0.0269714	0.445329				0.00357304	0.152689	0.0333195
-4.60554	-0.208813	0.214346	0.0684836	-0.0787917	0.0102822	-0.123211	0.00937679	-0.0286905	-0.128936	0.0162098	-0.0550071	-0.178609	-0.193481	0.0022283	0.0663285	-0.0799317	0.237047	0.0243722	0.0243722	0.0226425	0.465337				0.00407402	0.152872	0.0333594
-4.50724	-0.193327	0.213169	0.0498939	-0.0773547	0.00230656	-0.111226	0.00113582	-0.0282543	-0.104283	0.0233521	-0.0437534	-0.191053	-0.205902	0.00164983	0.0533446	-0.0757269	0.234635	0.026795	0.026795	0.0110946	0.479849				0.00443525	0.153023	0.0333923
-4.40893	-0.177561	0.211991	0.029101	-0.0727998	-0.00251979	-0.097517	-0.00446519	-0.0267336	-0.0798036	0.0298817	-0.0339218	-0.200026	-0.214561	-0.000839491	0.0389144	-0.0692166	0.229947	0.0319549	0.0319549	-0.00136513	0.493736				0.00553099	0.153015	0.0333905
-4.31063	-0.160702	0.206066	0.0100578	-0.0667544	-0.009411	-0.0807421	-0.00900408	-0.0229097	-0.0537799	0.0348123	-0.0240393	-0.209033	-0.221223	-0.00148001	0.0277118	-0.0631055	0.221463	0.0337145	0.0337145	-0.0134854	0.512758				0.00688703	0.153616	0.0335217
-4.21233	-0.140666	0.196655	-0.00428346	-0.0571233	-0.0172904	-0.0641859	-0.013158	-0.0114465	-0.0271318	0.035127	-0.0125179	-0.221485	-0.231362	-0.00248617	0.0163654	-0.060112	0.212781	0.0375442	0.0375442	-0.0314085	0.531578				0.00823513	0.155118	0.0338496
-4.11402	-0.120243	0.188164	-0.0166513	-0.0427211	-0.0264133	-0.0491021	-0.0171948	0.00477281	0.000651064	0.0357249	0.000583167	-0.234014	-0.239197	-0.00628613	0.00387487	-0.0586986	0.199888	0.0406005	0.0406005	-0.0536145	0.545275				0.00933327	0.156414	0.0341323
-4.01572	-0.097875	0.175725	-0.029263	-0.0294257	-0.0362486	-0.0315048	-0.0201541	0.0206192	0.0248181	0.040045	0.0139398	-0.244535	-0.246038	-0.00630665	-0.00576207	-0.0573532	0.180473	0.0381428	0.0381428	-0.075997	0.554761				0.00981923	0.15712	0.0342863
-3.91741	-0.0749728	0.161999	-0.0438213	-0.0174631	-0.0470686	-0.0167664	-0.0247919	0.0425097	0.0482668	0.0404119	0.0284671	-0.252206	-0.250211	-0.00818054	-0.017024	-0.052907	0.155009	0.0382281	0.0382281	-0.0966312	0.562868				0.0101878	0.157975	0.034473
-3.81911	-0.0588822	0.146164	-0.0575531	-0.00461314	-0.0592261	-0.00757249	-0.0312172	0.062469	0.0715283	0.0402272	0.0423022	-0.259426	-0.255383	-0.0129026	-0.0265161	-0.0452995	0.131058	0.0380029	0.0380029	-0.120561	0.568837				0.00949709	0.159889	0.0348907
-3.72081	-0.0434315	0.12942	-0.0711795	0.0104688	-0.0679073	0.00353661	-0.0426351	0.0837994	0.0943862	0.0406799	0.0534114	-0.26757	-0.258267	-0.0190247	-0.0340128	-0.0366609	0.107346	0.0373093	0.0373093	-0.144446	0.571854				0.00878034	0.162191	0.0353929
-3.6225	-0.0283266	0.113099	-0.0831448	0.0293304	-0.0730444	0.0116788	-0.0620723	0.0992748	0.115732	0.0406132	0.0617361	-0.276245	-0.259587	-0.0264577	-0.0388565	-0.030513	0.0847932	0.0375182	0.0375182	-0.163699	0.576073				0.0078772	0.16527	0.0360649
-3.5242	-0.0169972	0.101705	-0.0918873	0.0463076	-0.0742701	0.0140668	-0.0778341	0.110869	0.141299	0.0368334	0.066393	-0.282966	-0.257598	-0.0293977	-0.0438069	-0.0233567	0.0630329	0.0339673	0.0339673	-0.182388	0.579913				0.00704057	0.168406	0.0367492
-3.42589	-0.00263813	0.0949628	-0.0996749	0.0656517	-0.0747656	0.0140048	-0.0912444	0.126391	0.166234	0.0376946	0.0698898	-0.283826	-0.250135	-0.0313409	-0.0474782	-0.0133487	0.0413572	0.0302169	0.0302169	-0.200066	0.580829				0.00775864	0.170921	0.0372981
-3.32759	0.0104371	0.087908	-0.102347	0.083339	-0.0744181	0.0159506	-0.104353	0.141052	0.186646	0.0389517	0.0727141	-0.283747	-0.240871	-0.0350339	-0.0498814	-0.00224084	0.0181377	0.0220085	0.0220085	-0.214608	0.584451				0.0083859	0.173643	0.037892
-3.22929	0.0220094	0.0799263	-0.104771	0.100824	-0.076767	0.0201306	-0.116027	0.156835	0.200348	0.0430024	0.0740778	-0.280996	-0.22977	-0.0358235	-0.0516207	0.0116486	-0.00046228	0.0118855	0.0118855	-0.225262	0.587595				0.00946038	0.175946	0.0383947
-3.13098	0.0290093	0.0731176	-0.106482	0.11797	-0.0785962	0.0202632	-0.129123	0.171486	0.208882	0.0460723	0.0767397	-0.279726	-0.216684	-0.036356	-0.0528619	0.0247249	-0.0258058	-0.000447103	-0.000447103	-0.231453	0.590963				0.00958311	0.178249	0.0388971
-3.03268	0.0364578	0.0617368	-0.106683	0.130444	-0.0810222	0.021007	-0.145315	0.185226	0.213855	0.0464344	0.0764912	-0.27932	-0.204436	-0.0376754	-0.05263	0.0383698	-0.0499862	-0.0146207	-0.0146207	-0.240091	0.592888				0.00840522	0.180711	0.0394344
-2.93437	0.0433465	0.0478958	-0.102731	0.14347	-0.0809296	0.0238249	-0.163638	0.201299	0.219079	0.0417237	0.0765922	-0.281446	-0.191921	-0.035551	-0.0535269	0.0470329	-0.069718	-0.0260855	-0.0260855	-0.24796	0.59068				0.00739765	0.182988	0.0399312
-2.83607	0.0488604	0.0330092	-0.0987866	0.156401	-0.081366	0.0266825	-0.178661	0.214557	0.217654	0.0309008	0.0780152	-0.282144	-0.174938	-0.0326862	-0.0544054	0.0539461	-0.0926753	-0.0399949	-0.0399949	-0.250157	0.597202				0.00625807	0.185772	0.0405389
-2.73777	0.0518376	0.0198138	-0.0952506	0.167161	-0.0801513	0.029664	-0.190909	0.225116	0.214708	0.0176586	0.0784292	-0.279833	-0.158642	-0.025744	-0.053323	0.0628859	-0.116703	-0.0554776	-0.0554776	-0.252831	0.598144				0.00481322	0.187592	0.040936
-2.63946	0.0512568	0.0120265	-0.0885973	0.17568	-0.072484	0.0320738	-0.198521	0.233504	0.209627	0.00389238	0.0789235	-0.27722	-0.141336	-0.0150695	-0.053333	0.0708706	-0.136813	-0.0665108	-0.0665108	-0.253585	0.603461				0.00482552	0.189279	0.0413041
-2.54116	0.0467869	-0.000561793	-0.0808659	0.181948	-0.061398	0.0310784	-0.205257	0.23648	0.201847	-0.00681483	0.077932	-0.273848	-0.123011	-0.00331121	-0.0490078	0.0735798	-0.157779	-0.0731797	-0.0731797	-0.251933	0.608978				0.00468971	0.190101	0.0414834
-2.44285	0.0478342	-0.0154128	-0.0728768	0.185652	-0.0492116	0.0292469	-0.211359	0.236905	0.192531	-0.014496	0.0758801	-0.270818	-0.106878	0.0111596	-0.0427085	0.075126	-0.176545	-0.0824983	-0.0824983	-0.243789	0.618061				0.00491925	0.191171	0.041717
-2.34455	0.046785	-0.0327448	-0.0609661	0.185415	-0.0393099	0.0235165	-0.219327	0.237758	0.182116	-0.0230304	0.0741986	-0.27131	-0.0962201	0.0257277	-0.0374933	0.0734953	-0.193842	-0.0939274	-0.0939274	-0.234995	0.625858				0.00370362	0.19266	0.042042
-2.24625	0.0426706	-0.0486341	-0.0511286	0.182926	-0.0289393	0.0156586	-0.226894	0.234845	0.169688	-0.0285924	0.0721434	-0.270314	-0.0874664	0.0382732	-0.0327194	0.0675141	-0.20856	-0.103669	-0.103669	-0.230065	0.626918				0.00142788	0.192912	0.0420967
-2.14794	0.0347441	-0.0621084	-0.0468665	0.174908	-0.0178228	0.00895437	-0.234652	0.226934	0.155156	-0.0299511	0.0718709	-0.264814	-0.074635	0.0510798	-0.0283189	0.0618383	-0.225638	-0.110361	-0.110361	-0.219527	0.627215				-0.000588263	0.192073	0.0419138
-2.04964	0.0260087	-0.0764131	-0.0432592	0.165852	-0.00498386	0.00559329	-0.243607	0.210305	0.139359	-0.0338013	0.0708135	-0.258584	-0.0632015	0.0653384	-0.0261444	0.0595257	-0.235466	-0.115507	-0.115507	-0.207232	0.634249				-0.00222205	0.191696	0.0418316
-1.95133	0.0149161	-0.0856824	-0.0375585	0.15793	0.0107486	-0.0015027	-0.253967	0.193968	0.12623	-0.0384229	0.0692884	-0.252854	-0.0485417	0.0760062	-0.0246261	0.0583551	-0.237234	-0.117505	-0.117505	-0.19309	0.644296				-0.00270235	0.191559	0.0418016
-1.85303	-2.00724e-05	-0.0948043	-0.0304828	0.148126	0.0288409	-0.00539462	-0.264285	0.174302	0.110178	-0.0388025	0.0682379	-0.247722	-0.0325005	0.0873791	-0.0204866	0.0554773	-0.236402	-0.120887	-0.120887	-0.177207	0.655267				-0.00295585	0.191549	0.0417994
-1.75473	-0.0112108	-0.102883	-0.0249589	0.137821	0.0485886	-0.00446091	-0.272742	0.157611	0.0941477	-0.040351	0.0671845	-0.244656	-0.0160936	0.101618	-0.0192029	0.0489515	-0.235002	-0.126628	-0.126628	-0.159277	0.665453				-0.00298667	0.192163	0.0419333
-1.65642	-0.0234045	-0.107316	-0.0177029	0.126747	0.0644706	-0.00543577	-0.278893	0.139745	0.0804654	-0.0441121	0.068591	-0.242701	-0.00299294	0.11393	-0.0215751	0.042222	-0.231581	-0.130397	-0.130397	-0.141345	0.674322				-0.0032076	0.19264	0.0420375
-1.55812	-0.0404174	-0.109058	-0.0157907	0.11707	0.0763142	-0.00337802	-0.2794	0.122315	0.0679972	-0.0493403	0.0703376	-0.240437	0.00758404	0.127215	-0.0246141	0.0358531	-0.225317	-0.135758	-0.135758	-0.127059	0.681597				-0.00381169	0.193013	0.0421189
-1.45981	-0.054647	-0.114341	-0.0181254	0.110435	0.0847092	0.00278088	-0.281937	0.106814	0.0507788	-0.0492312	0.0736865	-0.239657	0.0161071	0.139633	-0.0258424	0.0278288	-0.21516	-0.139037	-0.139037	-0.110732	0.681876				-0.00443322	0.192415	0.0419883
-1.36151	-0.0698797	-0.123733	-0.0208761	0.104099	0.091043	0.00797483	-0.285387	0.0900525	0.0318202	-0.0540853	0.075999	-0.242128	0.0190781	0.150818	-0.0262582	0.0197845	-0.203569	-0.141758	-0.141758	-0.0939101	0.683534				-0.00614949	0.192574	0.0420231
-1.26321	-0.0856295	-0.130635	-0.0260297	0.100323	0.0959079	0.00907914	-0.285993	0.0747886	0.0155285	-0.0593819	0.0803034	-0.244293	0.0215304	0.163441	-0.0263527	0.00989993	-0.191326	-0.145065	-0.145065	-0.0813605	0.680345				-0.00809455	0.192289	0.0419609
-1.1649	-0.100509	-0.13818	-0.029604	0.0963354	0.102411	0.00817176	-0.285384	0.0607113	0.00320364	-0.0702264	0.0865717	-0.248025	0.0237565	0.175247	-0.0266332	-0.00156329	-0.177817	-0.148872	-0.148872	-0.069101	0.677216				-0.0100554	0.192502	0.0420073
-1.0666	-0.11434	-0.144961	-0.0323798	0.0924312	0.111364	0.00566251	-0.283517	0.0491621	-0.00625518	-0.0830405	0.0946446	-0.252932	0.0248164	0.187209	-0.025611	-0.0149107	-0.160399	-0.150764	-0.150764	-0.0601447	0.676615				-0.0113388	0.19337	0.0421968
-0.968294	-0.125197	-0.146917	-0.0354877	0.0908274	0.119987	-0.000104623	-0.277745	0.0396683	-0.0109736	-0.0923142	0.104728	-0.256308	0.0249286	0.199318	-0.0254627	-0.0290348	-0.141925	-0.150091	-0.150091	-0.0522296	0.677557				-0.0112793	0.194124	0.0423612
-0.86999	-0.133463	-0.146221	-0.0400934	0.0872901	0.12958	-0.00743078	-0.268981	0.0295395	-0.0163791	-0.0950481	0.115669	-0.259073	0.0240747	0.21048	-0.022474	-0.0399132	-0.127418	-0.148749	-0.148749	-0.0447614	0.679837				-0.0105849	0.194885	0.0425275
-0.771686	-0.140948	-0.142653	-0.0431147	0.0818178	0.142	-0.0116003	-0.259875	0.0230569	-0.017291	-0.0917238	0.126219	-0.262778	0.0223378	0.218288	-0.0200322	-0.0496511	-0.10572	-0.146647	-0.146647	-0.0417256	0.67439				-0.00915698	0.194056	0.0423466
-0.673382	-0.146711	-0.135035	-0.0448861	0.0776366	0.152316	-0.0133424	-0.249341	0.018608	-0.0173564	-0.08526	0.137447	-0.270127	0.022236	0.226191	-0.0183907	-0.060165	-0.0799382	-0.142452	-0.142452	-0.0360808	0.673517				-0.00636128	0.193931	0.0423192
-0.575078	-0.150872	-0.129913	-0.0487825	0.0735055	0.153631	-0.0159853	-0.236836	0.0142427	-0.0161923	-0.0801613	0.146853	-0.276574	0.0214985	0.229715	-0.0164062	-0.071338	-0.0571469	-0.144233	-0.144233	-0.0302487	0.666797				-0.0053656	0.192813	0.0420752
-0.476774	-0.154358	-0.119816	-0.0537743	0.0701943	0.152879	-0.0175038	-0.221665	0.0118163	-0.0151811	-0.0763351	0.157466	-0.28406	0.0168652	0.232805	-0.0174959	-0.0781309	-0.0336421	-0.145823	-0.145823	-0.0280854	0.657732				-0.00437787	0.191243	0.0417326
-0.37847	-0.160031	-0.108012	-0.059006	0.065619	0.153323	-0.0187062	-0.208688	0.0116494	-0.0152705	-0.0757171	0.169915	-0.29306	0.0124476	0.233282	-0.0185393	-0.0854986	-0.010729	-0.141625	-0.141625	-0.0281793	0.643452				-0.00357139	0.189026	0.0412488
-0.280166	-0.163304	-0.0968348	-0.0676778	0.0624292	0.156899	-0.0147508	-0.193875	0.0103976	-0.0151362	-0.0723765	0.182967	-0.301231	0.00925111	0.233449	-0.0161245	-0.089961	0.0104711	-0.138843	-0.138843	-0.0245691	0.62894				-0.001844	0.187011	0.0408092
-0.181862	-0.163667	-0.0830202	-0.0754627	0.0625959	0.163622	-0.00923393	-0.178817	0.0130029	-0.0144568	-0.0736666	0.196343	-0.307725	0.00786208	0.234445	-0.0146589	-0.087525	0.0318226	-0.134947	-0.134947	-0.0173523	0.618157				0.00154149	0.185662	0.0405148
-0.0835584	-0.165266	-0.0630772	-0.0800514	0.0638857	0.170754	-0.00310549	-0.162211	0.016137	-0.0091619	-0.0752839	0.206912	-0.314247	0.00292114	0.236506	-0.0127636	-0.085499	0.0544988	-0.134278	-0.134278	-0.0119156	0.606145				0.00507724	0.184429	0.0402458
0.0147456	-0.167742	-0.0379393	-0.085759	0.0637368	0.177477	-0.000857587	-0.141334	0.0252792	-0.000881248	-0.0741199	0.21658	-0.320685	-0.00549461	0.23787	-0.00753808	-0.0870222	0.0722524	-0.137193	-0.137193	-0.00634595	0.589708				0.00822853	0.182812	0.0398929
0.11305	-0.170871	-0.0161748	-0.0916159	0.0609718	0.181855	0.00281003	-0.119049	0.0343711	0.0049485	-0.074771	0.225858	-0.326526	-0.0194836	0.239829	-0.00379144	-0.0882666	0.0859741	-0.139769	-0.139769	0.00215675	0.573841				0.0105965	0.181574	0.0396228
0.211354	-0.16822	0.00663631	-0.0967873	0.0597695	0.182327	0.00654291	-0.0934525	0.0455908	0.0149619	-0.0787543	0.23526	-0.331506	-0.0350727	0.241147	-0.00135502	-0.0903681	0.0996957	-0.14353	-0.14353	0.00859746	0.555994				0.013045	0.180128	0.0393072
0.309658	-0.165814	0.0319263	-0.101821	0.0570251	0.18199	0.00773574	-0.0672597	0.0548442	0.0248854	-0.0816702	0.245729	-0.334665	-0.0504403	0.241835	0.00307339	-0.0908758	0.111637	-0.144279	-0.144279	0.013817	0.538021				0.0157816	0.178664	0.0389876
0.407962	-0.159546	0.0534713	-0.113266	0.0536481	0.184285	0.00915381	-0.0378383	0.0632141	0.0296062	-0.0822964	0.254895	-0.334731	-0.0632048	0.245625	0.0112647	-0.0905384	0.119245	-0.144689	-0.144689	0.0214835	0.522793				0.018947	0.177701	0.0387776
0.506266	-0.148424	0.0716057	-0.117569	0.0451134	0.189417	0.00769908	-0.00923522	0.0720437	0.0339344	-0.0794757	0.262102	-0.336622	-0.0753478	0.248848	0.019276	-0.0894831	0.128395	-0.144991	-0.144991	0.0313993	0.506599				0.0223949	0.176651	0.0385483
0.60457	-0.138839	0.0915991	-0.11522	0.0305777	0.195308	0.00211349	0.0233198	0.0793724	0.0417598	-0.0804016	0.266307	-0.336422	-0.0874052	0.249437	0.0269167	-0.0885355	0.137665	-0.14386	-0.14386	0.0408559	0.494476				0.0259602	0.175928	0.0383907
0.702874	-0.131077	0.112376	-0.113405	0.0134596	0.201063	-9.86271e-05	0.0574661	0.0858399	0.049764	-0.0795202	0.27191	-0.335561	-0.0940452	0.248776	0.0310193	-0.088491	0.141122	-0.142885	-0.142885	0.0533706	0.483523				0.0296057	0.175634	0.0383265
0.801178	-0.122236	0.128969	-0.11406	-0.00409103	0.207404	7.39639e-06	0.0901645	0.0883959	0.0566748	-0.0772772	0.27498	-0.33257	-0.100062	0.249711	0.0347525	-0.0882631	0.143304	-0.140727	-0.140727	0.0676878	0.47347				0.0331193	0.175417	0.0382791
0.899482	-0.113371	0.149818	-0.113555	-0.0200661	0.213665	-0.00245551	0.122877	0.0863004	0.0618882	-0.0685466	0.275851	-0.327023	-0.108024	0.251116	0.0405852	-0.090003	0.14577	-0.134937	-0.134937	0.0799688	0.459493				0.0368768	0.174503	0.0380798
0.997786	-0.100688	0.171217	-0.112193	-0.0371889	0.216397	-0.00241728	0.154282	0.0803368	0.0629162	-0.0598562	0.27219	-0.31657	-0.114648	0.252711	0.0443612	-0.0880676	0.150144	-0.128449	-0.128449	0.0983087	0.442034				0.0407796	0.172484	0.0376392
1.09609	-0.0903222	0.188169	-0.110495	-0.0531532	0.217742	0.00121638	0.186929	0.0772313	0.0598251	-0.0544449	0.267268	-0.303901	-0.119764	0.253979	0.0463777	-0.0851529	0.153438	-0.122615	-0.122615	0.118851	0.421759				0.0443011	0.170421	0.0371888
1.19439	-0.0838456	0.203363	-0.109316	-0.0654228	0.216308	0.0072854	0.217636	0.0762315	0.0561611	-0.0540426	0.258692	-0.290546	-0.126374	0.2527	0.0451345	-0.0857661	0.16217	-0.119509	-0.119509	0.136502	0.397514				0.046446	0.168676	0.0368081
1.2927	-0.0758579	0.215846	-0.110554	-0.0740346	0.213143	0.00979766	0.247907	0.0745823	0.0551916	-0.0582123	0.249211	-0.27703	-0.135114	0.253051	0.0444978	-0.086832	0.167627	-0.117043	-0.117043	0.15759	0.376545				0.048251	0.16803	0.0366672
1.391	-0.0662098	0.222945	-0.115108	-0.0823262	0.20909	0.00962593	0.273108	0.0721824	0.0536366	-0.0644907	0.24022	-0.261807	-0.146597	0.252703	0.0466297	-0.0882648	0.169155	-0.113616	-0.113616	0.180468	0.357099				0.0492775	0.167595	0.0365722
1.48931	-0.0556967	0.22955	-0.120568	-0.088742	0.21027	0.0122702	0.29748	0.0682673	0.049071	-0.0685968	0.231098	-0.246285	-0.158955	0.253612	0.0489375	-0.0880855	0.175237	-0.105844	-0.105844	0.204362	0.343098				0.0516494	0.168072	0.0366764
1.58761	-0.0426519	0.235705	-0.122322	-0.0943333	0.213631	0.0174962	0.325365	0.0661075	0.0448131	-0.071833	0.220188	-0.231626	-0.167797	0.256223	0.0479399	-0.0893687	0.180617	-0.104962	-0.104962	0.229861	0.330461				0.0542168	0.169842	0.0370627
1.68591	-0.0312432	0.241463	-0.1252	-0.0950762	0.212836	0.022958	0.358131	0.0647559	0.0437689	-0.0704087	0.207229	-0.214841	-0.173764	0.260532	0.0416138	-0.0894163	0.181424	-0.106465	-0.106465	0.25441	0.323753				0.0571427	0.172185	0.0375738
1.78422	-0.0227353	0.251537	-0.129233	-0.0937466	0.209506	0.0256292	0.391277	0.0625439	0.0433524	-0.0716875	0.192968	-0.198109	-0.1792	0.26565	0.0324904	-0.0907506	0.182198	-0.106385	-0.106385	0.275779	0.316845				0.0595972	0.175119	0.0382141
1.88252	-0.016706	0.258409	-0.134659	-0.0936099	0.20327	0.0265892	0.425045	0.0576899	0.0437622	-0.0689998	0.178796	-0.185692	-0.18701	0.269776	0.0233428	-0.097596	0.181805	-0.105381	-0.105381	0.298558	0.310406				0.0610674	0.179065	0.0390753
1.98083	-0.00647173	0.255442	-0.140328	-0.0925926	0.195133	0.0278556	0.455677	0.053313	0.0401141	-0.0668671	0.166943	-0.17812	-0.191699	0.272774	0.0146596	-0.103287	0.183522	-0.104684	-0.104684	0.32094	0.310364				0.0622859	0.183104	0.0399565
2.07913	0.00208809	0.244645	-0.145022	-0.0904373	0.186619	0.0314546	0.480124	0.051679	0.0327134	-0.0660823	0.157606	-0.172503	-0.195167	0.274123	0.00383944	-0.108344	0.188132	-0.102573	-0.102573	0.3413	0.315174				0.0631808	0.186639	0.0407281
2.17743	0.0136385	0.234622	-0.156538	-0.0863682	0.177994	0.0360745	0.502498	0.0466026	0.0264305	-0.0670145	0.149542	-0.168475	-0.195279	0.276799	-0.00651741	-0.115797	0.192677	-0.103119	-0.103119	0.356292	0.321246				0.0634376	0.190615	0.0415957
2.27574	0.0213107	0.223464	-0.170535	-0.0800523	0.170381	0.03917	0.522769	0.0369111	0.0197538	-0.0687364	0.138934	-0.165996	-0.196602	0.278911	-0.0157993	-0.121113	0.196116	-0.104871	-0.104871	0.372656	0.332969				0.0630842	0.195309	0.0426199
2.37404	0.0298434	0.208905	-0.183869	-0.0725947	0.162989	0.041722	0.538756	0.0268409	0.013462	-0.0684312	0.126825	-0.161244	-0.199367	0.277012	-0.0237228	-0.126762	0.203855	-0.109463	-0.109463	0.389394	0.348348				0.0625256	0.199923	0.0436268
2.47235	0.0327576	0.197947	-0.190364	-0.0641923	0.153111	0.0455684	0.549401	0.0175833	0.00890758	-0.0690766	0.112642	-0.158919	-0.204458	0.272402	-0.0329586	-0.132099	0.215805	-0.115783	-0.115783	0.403673	0.364316				0.0614515	0.204169	0.0445532
2.57065	0.0345717	0.187267	-0.201903	-0.0527776	0.141603	0.051467	0.563067	0.0111514	0.00580514	-0.0708521	0.10029	-0.155082	-0.212159	0.264786	-0.0419995	-0.137501	0.222201	-0.119642	-0.119642	0.413986	0.385274				0.0604719	0.208814	0.0455669
2.66895	0.0386349	0.17373	-0.219842	-0.036703	0.132395	0.0584618	0.570989	0.00848061	0.000140719	-0.0699687	0.0924574	-0.150292	-0.21879	0.259717	-0.0547959	-0.141242	0.223751	-0.125519	-0.125519	0.422784	0.409481				0.0594452	0.213418	0.0465716
2.76726	0.0425391	0.160802	-0.234195	-0.0179613	0.1246	0.061696	0.57567	0.00615691	-0.00307951	-0.0702451	0.0837901	-0.145935	-0.228986	0.256126	-0.0648449	-0.143831	0.232277	-0.134836	-0.134836	0.427106	0.429026				0.0581448	0.217736	0.0475139
2.86556	0.0447207	0.148993	-0.244903	0.00119787	0.116505	0.066792	0.578095	0.0109291	-0.00374514	-0.0715388	0.0772886	-0.146049	-0.238116	0.249701	-0.0753708	-0.145902	0.240113	-0.143748	-0.143748	0.428745	0.452888				0.0572784	0.221896	0.0484216
2.96387	0.0471676	0.13333	-0.258768	0.0178392	0.109106	0.0735975	0.574634	0.0230367	-0.0034837	-0.0735124	0.0707744	-0.148867	-0.245595	0.240942	-0.0889797	-0.145725	0.243179	-0.156148	-0.156148	0.432166	0.485376				0.055901	0.226787	0.049489
3.06217	0.0444495	0.117453	-0.275507	0.0365271	0.102055	0.0786047	0.572055	0.0389465	0.000545655	-0.0704088	0.0663168	-0.155406	-0.25326	0.228367	-0.0989093	-0.14674	0.244441	-0.169555	-0.169555	0.430381	0.519901				0.0543192	0.231999	0.0506263
3.16047	0.042972	0.1015	-0.292102	0.0548343	0.0940051	0.081724	0.56376	0.0500524	0.00565583	-0.0649819	0.0614021	-0.164986	-0.260084	0.217176	-0.104565	-0.148821	0.24798	-0.181139	-0.181139	0.428243	0.559673				0.0529124	0.237488	0.0518241
3.25878	0.0457808	0.0825307	-0.310914	0.0709692	0.0875974	0.0793936	0.555392	0.0607852	0.010693	-0.0598832	0.0595649	-0.174192	-0.264856	0.208754	-0.107923	-0.147607	0.244569	-0.191722	-0.191722	0.431838	0.606068				0.0521484	0.244123	0.0532721
3.35708	0.0447837	0.0651686	-0.329506	0.0851836	0.0814426	0.0761762	0.545709	0.0696221	0.0125531	-0.0565437	0.0582257	-0.183328	-0.270103	0.200799	-0.112064	-0.145882	0.241016	-0.201021	-0.201021	0.432026	0.652535				0.0507512	0.250894	0.0547495
3.45539	0.0395037	0.0517412	-0.342681	0.0975911	0.076061	0.0735013	0.537779	0.0796995	0.0154591	-0.0539975	0.057689	-0.192171	-0.274694	0.188334	-0.121684	-0.143807	0.238143	-0.211029	-0.211029	0.425378	0.697651				0.0489256	0.257362	0.056161
3.55369	0.0347669	0.0376952	-0.353023	0.109785	0.0717578	0.066265	0.531978	0.0942047	0.0204621	-0.0530304	0.0583103	-0.203805	-0.278853	0.173068	-0.130564	-0.144579	0.229509	-0.224312	-0.224312	0.414256	0.741287				0.0462318	0.264042	0.0576188
3.65199	0.0257357	0.0211606	-0.366701	0.12128	0.0645592	0.0547801	0.520682	0.107173	0.0274591	-0.0540421	0.0603064	-0.216034	-0.282469	0.156672	-0.133871	-0.14562	0.221857	-0.228949	-0.228949	0.401085	0.782694				0.0432767	0.269541	0.0588187
3.7503	0.0172628	0.00545459	-0.376961	0.131307	0.0608063	0.0428971	0.505617	0.117255	0.0303794	-0.0613953	0.06201	-0.229768	-0.287388	0.138539	-0.129496	-0.146313	0.219874	-0.234283	-0.234283	0.38897	0.82393				0.0402103	0.275182	0.0600495
3.8486	0.00952067	-0.0112833	-0.382314	0.139861	0.0585905	0.0323682	0.489433	0.130265	0.0324254	-0.0658235	0.0652087	-0.244064	-0.289279	0.117882	-0.123899	-0.14702	0.217872	-0.239172	-0.239172	0.375388	0.866422				0.0377719	0.280663	0.0612456
3.94691	0.002291	-0.0235665	-0.385005	0.146628	0.0568652	0.0239452	0.472211	0.145581	0.0347271	-0.0709888	0.0674667	-0.25572	-0.287917	0.0978684	-0.118638	-0.143381	0.21928	-0.245537	-0.245537	0.357397	0.908361				0.0360159	0.285844	0.0623763
4.04521	-0.00780473	-0.0293197	-0.387797	0.157803	0.057651	0.0115619	0.458407	0.161612	0.0362864	-0.0758066	0.0697993	-0.26351	-0.287742	0.0757036	-0.115561	-0.140374	0.214709	-0.248176	-0.248176	0.339862	0.946659				0.0345613	0.290709	0.0634379
4.14351	-0.0152877	-0.0313947	-0.390489	0.170084	0.0565088	-0.00219552	0.451945	0.169323	0.039445	-0.0797357	0.0691145	-0.26906	-0.283189	0.0545143	-0.109761	-0.135221	0.208434	-0.250644	-0.250644	0.323543	0.981799				0.033671	0.295299	0.0644394
4.24182	-0.0254355	-0.0329822	-0.382648	0.181793	0.055839	-0.0172117	0.448178	0.18239	0.0420785	-0.0772993	0.0676109	-0.271671	-0.278202	0.0331544	-0.101838	-0.126111	0.20552	-0.251	-0.251	0.307224	1.01097				0.0342551	0.298383	0.0651125
4.34012	-0.036627	-0.0346709	-0.371675	0.190613	0.0575128	-0.0325287	0.443322	0.199136	0.0409749	-0.0711246	0.0696293	-0.275456	-0.273517	0.0147983	-0.0942054	-0.118024	0.202361	-0.245003	-0.245003	0.286232	1.0349				0.0353166	0.300051	0.0654764
4.43843	-0.0487263	-0.034169	-0.357755	0.199217	0.0575962	-0.0484252	0.442685	0.216852	0.0393664	-0.0684809	0.0717908	-0.282269	-0.268518	-0.00042574	-0.0897505	-0.108641	0.195279	-0.234374	-0.234374	0.265633	1.05822				0.0367016	0.301821	0.0658627
4.53673	-0.0584231	-0.0383857	-0.345034	0.204968	0.0588237	-0.0658056	0.445629	0.233775	0.0418844	-0.0649994	0.0762983	-0.290804	-0.260122	-0.0158174	-0.0862149	-0.101191	0.187363	-0.222509	-0.222509	0.247215	1.07567				0.0380862	0.303219	0.0661677
4.63503	-0.0706401	-0.043501	-0.332272	0.211406	0.0602996	-0.0839554	0.444923	0.246684	0.045295	-0.0638284	0.0797068	-0.298615	-0.247701	-0.0292339	-0.0828681	-0.09494	0.183396	-0.211794	-0.211794	0.231306	1.08491				0.0388948	0.30342	0.0662116
4.73334	-0.0854413	-0.0478857	-0.314129	0.216225	0.0576683	-0.101043	0.447529	0.254983	0.0495	-0.064012	0.079576	-0.311814	-0.236291	-0.0445428	-0.074962	-0.0889548	0.18167	-0.200081	-0.200081	0.214894	1.09295				0.0393216	0.303678	0.066268
4.83164	-0.0991124	-0.0528851	-0.296944	0.219135	0.0556154	-0.116776	0.451785	0.265387	0.0528832	-0.0629107	0.0790134	-0.327024	-0.223801	-0.0593714	-0.0660186	-0.0821651	0.173291	-0.184588	-0.184588	0.201071	1.10306				0.0402409	0.304419	0.0664297
4.92995	-0.114654	-0.0556156	-0.279392	0.219135	0.0550818	-0.134601	0.45833	0.269204	0.0531464	-0.0605164	0.076529	-0.339335	-0.21347	-0.0730997	-0.0570496	-0.0746263	0.16672	-0.166615	-0.166615	0.187846	1.10946				0.0409457	0.304531	0.0664542
5.02825	-0.132226	-0.0555825	-0.257795	0.220137	0.0546792	-0.152598	0.472549	0.266623	0.0547556	-0.061197	0.0743259	-0.352188	-0.204506	-0.0833927	-0.0463692	-0.067113	0.163261	-0.146665	-0.146665	0.173325	1.11058				0.0420925	0.30424	0.0663905
5.12655	-0.147424	-0.0597369	-0.232956	0.219528	0.0559485	-0.169444	0.485713	0.260394	0.0542282	-0.0662513	0.0740146	-0.366223	-0.198077	-0.0898059	-0.0398236	-0.0613538	0.158123	-0.128379	-0.128379	0.159053	1.11327				0.042496	0.304537	0.0664555
5.22486	-0.163432	-0.0640124	-0.205897	0.2177	0.0588684	-0.18702	0.502886	0.254422	0.0528008	-0.0694528	0.076477	-0.378684	-0.196301	-0.100162	-0.0364244	-0.0554992	0.151895	-0.113155	-0.113155	0.144303	1.11373				0.0423754	0.305402	0.0666442
5.32316	-0.183362	-0.0610733	-0.172327	0.21346	0.0598236	-0.200315	0.519372	0.246576	0.0544826	-0.0693053	0.077451	-0.391571	-0.194287	-0.111681	-0.0341268	-0.0515983	0.149017	-0.0984339	-0.0984339	0.123218	1.11013				0.0422387	0.305481	0.0666615
5.42147	-0.200958	-0.0575086	-0.134651	0.208429	0.0587612	-0.210509	0.535414	0.238772	0.0548718	-0.0639408	0.0785882	-0.404982	-0.188703	-0.124952	-0.0310895	-0.0459177	0.143705	-0.0878846	-0.0878846	0.10583	1.10613				0.0424533	0.305604	0.0666882
5.51977	-0.214583	-0.0542954	-0.0988524	0.206677	0.058679	-0.218812	0.552535	0.229757	0.0516676	-0.0545682	0.0772482	-0.420858	-0.180998	-0.132665	-0.0233966	-0.0411009	0.137634	-0.0787789	-0.0787789	0.094842	1.10157				0.0434723	0.305998	0.0667742
5.61807	-0.23131	-0.0472982	-0.0637889	0.20234	0.0552766	-0.223246	0.566493	0.216834	0.0487594	-0.0439471	0.0777304	-0.433212	-0.170714	-0.136498	-0.0176379	-0.0329838	0.131462	-0.0673222	-0.0673222	0.0846881	1.09817				0.0450699	0.305942	0.0667619
5.71638	-0.245216	-0.0378533	-0.0252523	0.194274	0.054599	-0.226269	0.581933	0.204977	0.0436298	-0.0314639	0.0779924	-0.44349	-0.161988	-0.140096	-0.0134312	-0.024462	0.125756	-0.0587706	-0.0587706	0.0767412	1.09718				0.0471437	0.306503	0.0668845
5.81468	-0.256412	-0.027475	0.00988642	0.18382	0.0512111	-0.231727	0.593338	0.194032	0.0421882	-0.0156407	0.0813698	-0.452016	-0.153099	-0.139662	-0.0139848	-0.0150198	0.115482	-0.0489099	-0.0489099	0.0686161	1.09232				0.0490192	0.306148	0.066807
5.91299	-0.265107	-0.0153071	0.0433764	0.17388	0.0469681	-0.237382	0.602656	0.17921	0.0410308	-0.00279523	0.08481	-0.458725	-0.149292	-0.134163	-0.0151151	-0.00442851	0.10704	-0.0408789	-0.0408789	0.0611343	1.08931				0.0507306	0.306084	0.066793
6.01129	-0.271115	-0.00397744	0.0757575	0.165441	0.0437722	-0.2426	0.609984	0.159368	0.039978	0.0103342	0.0899946	-0.466041	-0.1486	-0.125135	-0.0124604	0.00476767	0.0975889	-0.033892	-0.033892	0.0567524	1.08436				0.0523994	0.30574	0.066718
6.10959	-0.27752	0.0047743	0.107515	0.150968	0.0385247	-0.243699	0.61455	0.138629	0.041828	0.0211962	0.094161	-0.475965	-0.147422	-0.115012	-0.00708534	0.0148535	0.0896134	-0.029993	-0.029993	0.0536775	1.07679				0.0533518	0.305068	0.0665714
6.2079	-0.2857	0.0150579	0.138475	0.135203	0.0377455	-0.242268	0.611413	0.124424	0.0431464	0.0336455	0.101279	-0.485674	-0.150059	-0.105687	-0.00355639	0.0231158	0.0823035	-0.0248705	-0.0248705	0.0485553	1.07098				0.054412	0.304512	0.06645
6.3062	-0.292856	0.0255342	0.165478	0.120219	0.0384546	-0.241561	0.603082	0.10863	0.0445175	0.0435099	0.109319	-0.498874	-0.153991	-0.098047	-0.00161309	0.0294739	0.0732687	-0.019412	-0.019412	0.0473476	1.07243				0.055024	0.305301	0.0666222
6.40451	-0.297013	0.0386681	0.192894	0.103204	0.0348667	-0.237775	0.593805	0.0934315	0.0495939	0.0530197	0.113411	-0.511259	-0.155759	-0.0938618	-0.000500688	0.0345881	0.0647878	-0.0194534	-0.0194534	0.0509227	1.07747				0.0555039	0.306612	0.0669082
6.50281	-0.302746	0.0509872	0.221505	0.086536	0.0330226	-0.2301	0.582056	0.0797335	0.0552915	0.0648873	0.118899	-0.523742	-0.153316	-0.0846148	0.00364757	0.0377032	0.0575431	-0.0238147	-0.0238147	0.0509762	1.08026				0.0562333	0.307478	0.0670972
6.60111	-0.308507	0.0672029	0.249003	0.0767375	0.0288309	-0.219523	0.56747	0.0665067	0.0562149	0.0742487	0.125028	-0.53302	-0.151408	-0.0719121	0.00894925	0.0418437	0.0455751	-0.0297911	-0.0297911	0.0497916	1.08771				0.0571981	0.308771	0.0673794
6.69942	-0.309655	0.0891123	0.279506	0.0673556	0.0231223	-0.206469	0.551456	0.0585994	0.0566184	0.0878866	0.134288	-0.546823	-0.151503	-0.056612	0.0143683	0.047748	0.0302157	-0.03615	-0.03615	0.0492864	1.10154				0.0594163	0.311603	0.0679974
6.79772	-0.307696	0.116786	0.309672	0.0603681	0.0205194	-0.191535	0.53415	0.0550879	0.05915	0.100213	0.146833	-0.556551	-0.149144	-0.0377283	0.0204346	0.0522054	0.0149605	-0.0419534	-0.0419534	0.051089	1.11438				0.0632994	0.313887	0.0684958
6.89603	-0.305564	0.144995	0.339447	0.056736	0.0131156	-0.175617	0.516314	0.045769	0.0627286	0.112707	0.160947	-0.563076	-0.14474	-0.0224175	0.0263757	0.0551625	0.00635112	-0.048673	-0.048673	0.0514488	1.12936				0.0672715	0.316617	0.0690914
6.99433	-0.297942	0.17156	0.369323	0.0574139	0.00169096	-0.159298	0.496496	0.0394841	0.0676731	0.125322	0.175567	-0.570062	-0.136782	-0.00657598	0.0324694	0.0572173	0.000883871	-0.0589113	-0.0589113	0.0507686	1.1469				0.0716325	0.319794	0.0697849
7.09263	-0.289328	0.196005	0.396295	0.0606744	-0.010744	-0.13919	0.470105	0.0367486	0.0697287	0.139512	0.192643	-0.574688	-0.127946	0.0082447	0.0395755	0.0589195	-0.00625602	-0.0710885	-0.0710885	0.0493521	1.16268				0.0757217	0.322334	0.0703389
7.19094	-0.28169	0.226808	0.423664	0.0657467	-0.0269565	-0.118235	0.443127	0.0366534	0.0738239	0.153698	0.206117	-0.575584	-0.116847	0.0219295	0.0501006	0.0620133	-0.0102496	-0.0811872	-0.0811872	0.0480941	1.17357				0.0806385	0.32416	0.0707374
7.28924	-0.27697	0.260674	0.448181	0.0753846	-0.0428355	-0.0961734	0.411956	0.0372212	0.0828837	0.16359	0.215917	-0.577665	-0.101555	0.0410789	0.060073	0.0657531	-0.0135265	-0.0916081	-0.0916081	0.0474739	1.18386				0.0858147	0.326116	0.0711643
7.38755	-0.27051	0.290279	0.466097	0.0886868	-0.0587614	-0.0743686	0.380289	0.0391958	0.0865355	0.16889	0.225481	-0.579616	-0.0903345	0.0608546	0.0711191	0.0702507	-0.0204181	-0.101529	-0.101529	0.0537125	1.19473				0.090431	0.328193	0.0716175
7.48585	-0.263274	0.320737	0.480938	0.103695	-0.0729526	-0.0537531	0.351169	0.044339	0.0916019	0.169831	0.233218	-0.580725	-0.0788673	0.0822641	0.0827804	0.0703076	-0.0227523	-0.107308	-0.107308	0.0553665	1.20528				0.0954563	0.330176	0.0720503
7.58415	-0.257584	0.348985	0.495802	0.115894	-0.0889922	-0.0362052	0.321271	0.0505429	0.0982415	0.16582	0.240858	-0.580956	-0.0677659	0.101455	0.0940381	0.0711833	-0.0206125	-0.111559	-0.111559	0.0532531	1.21556				0.0998888	0.332383	0.072532
7.68246	-0.25055	0.373667	0.509766	0.128513	-0.103835	-0.0206631	0.289408	0.0611353	0.104618	0.162049	0.244809	-0.583607	-0.0549836	0.120855	0.108286	0.0706893	-0.0136793	-0.116397	-0.116397	0.0535632	1.22566				0.104424	0.334733	0.0730448
7.78076	-0.245137	0.39653	0.520368	0.146844	-0.118821	-0.00384094	0.258678	0.0698216	0.11289	0.154975	0.245389	-0.586045	-0.0396079	0.141206	0.122325	0.0685806	-0.00493314	-0.124894	-0.124894	0.0528263	1.2364				0.108508	0.337542	0.0736578
7.87907	-0.242714	0.416642	0.533603	0.168005	-0.131864	0.0168946	0.235997	0.0766965	0.119033	0.146622	0.242019	-0.589824	-0.0252297	0.157298	0.139228	0.0646478	0.00763122	-0.132437	-0.132437	0.0528162	1.24888				0.112929	0.341259	0.0744687
7.97737	-0.243428	0.433593	0.546284	0.187114	-0.14581	0.0357708	0.214672	0.0854715	0.126948	0.140168	0.237524	-0.59652	-0.00746631	0.168998	0.157705	0.0578725	0.017243	-0.137457	-0.137457	0.0530371	1.25938				0.11684	0.345152	0.0753183
8.07567	-0.246673	0.447325	0.560575	0.204952	-0.162184	0.0533215	0.196323	0.099727	0.132716	0.131592	0.228808	-0.603853	0.011734	0.177142	0.172736	0.0484999	0.0254776	-0.142225	-0.142225	0.051948	1.27353				0.119964	0.350096	0.0763973
8.17398	-0.24685	0.460178	0.574431	0.224061	-0.178246	0.0697728	0.179454	0.114888	0.135993	0.122911	0.216802	-0.607731	0.028708	0.187847	0.18763	0.0387235	0.0406432	-0.146562	-0.146562	0.0477927	1.29262				0.123643	0.355528	0.0775826
8.27228	-0.24705	0.474096	0.589703	0.243028	-0.199038	0.0832788	0.166572	0.129771	0.141837	0.112234	0.202108	-0.611394	0.0479909	0.201015	0.2029	0.0273197	0.0568811	-0.152415	-0.152415	0.0437564	1.30941				0.127123	0.361382	0.0788599
8.37059	-0.24655	0.489059	0.6	0.25931	-0.22181	0.100081	0.158305	0.142834	0.145972	0.0964497	0.185358	-0.612247	0.0673792	0.216466	0.217606	0.0154159	0.0693942	-0.159458	-0.159458	0.037294	1.32224				0.129697	0.366633	0.0800058
8.46889	-0.248918	0.499724	0.604792	0.278865	-0.242066	0.113236	0.150551	0.15437	0.148789	0.078469	0.170928	-0.611215	0.0869267	0.234693	0.233371	0.00543714	0.0863305	-0.164051	-0.164051	0.0306624	1.33106				0.132281	0.370831	0.080922
8.56719	-0.245649	0.507748	0.602271	0.299104	-0.262402	0.12218	0.143645	0.162677	0.149516	0.0614096	0.153264	-0.609042	0.101354	0.245179	0.247971	-0.00309001	0.105601	-0.166143	-0.166143	0.0288592	1.34292				0.134344	0.3745	0.0817226
8.6655	-0.242003	0.513621	0.600664	0.311435	-0.278512	0.127101	0.143224	0.172953	0.15377	0.0456229	0.133504	-0.607346	0.116806	0.251385	0.26369	-0.0132354	0.129462	-0.166517	-0.166517	0.0272491	1.35859				0.136902	0.378495	0.0825943
8.7638	-0.240331	0.513451	0.595699	0.321122	-0.293633	0.127466	0.143521	0.179684	0.156829	0.0251639	0.111306	-0.600335	0.133628	0.255985	0.278976	-0.024242	0.160544	-0.164763	-0.164763	0.0231912	1.37266				0.138627	0.381463	0.0832419
8.86211	-0.239758	0.507493	0.583992	0.328153	-0.309475	0.125588	0.142598	0.182521	0.157284	0.00330288	0.087234	-0.593787	0.145843	0.25669	0.292352	-0.0332382	0.193927	-0.161564	-0.161564	0.0172924	1.38689				0.138656	0.384056	0.0838078
8.96041	-0.240078	0.502355	0.570102	0.330002	-0.320081	0.122615	0.143214	0.192411	0.153213	-0.0178518	0.0608364	-0.587806	0.15504	0.2589	0.304319	-0.0429951	0.224339	-0.158952	-0.158952	0.0126723	1.39637				0.13808	0.38594	0.0842191
9.05871	-0.24377	0.496139	0.54998	0.328998	-0.3249	0.120307	0.146068	0.204404	0.151215	-0.0385788	0.0348537	-0.581954	0.160969	0.262611	0.316617	-0.0526837	0.252049	-0.155184	-0.155184	0.0126606	1.40497				0.137599	0.387284	0.0845123
9.15702	-0.247279	0.491059	0.526863	0.324476	-0.330674	0.114524	0.152884	0.214863	0.152354	-0.0617882	0.0049212	-0.57721	0.168002	0.266272	0.327809	-0.0640162	0.278674	-0.149363	-0.149363	0.0154951	1.41894				0.137021	0.389731	0.0850463
9.25532	-0.250232	0.48145	0.498993	0.317367	-0.330498	0.10756	0.157484	0.223637	0.154588	-0.0840311	-0.0222034	-0.574687	0.174013	0.26876	0.337235	-0.0773111	0.303907	-0.146527	-0.146527	0.0204589	1.43817				0.135791	0.392822	0.0857209
9.35363	-0.2474	0.470044	0.470591	0.301898	-0.332564	0.102114	0.165607	0.232435	0.153092	-0.103555	-0.047746	-0.569663	0.179497	0.266915	0.348998	-0.0914059	0.328071	-0.14045	-0.14045	0.0256222	1.45762				0.134727	0.395392	0.0862815
9.45193	-0.244697	0.46048	0.447372	0.284787	-0.334592	0.0953602	0.177101	0.24089	0.155679	-0.12008	-0.072682	-0.561416	0.190942	0.265813	0.357402	-0.105704	0.359312	-0.134341	-0.134341	0.0253779	1.47875				0.134829	0.39878	0.0870209
9.55023	-0.244367	0.444688	0.420919	0.266703	-0.334883	0.0877231	0.188567	0.246369	0.157945	-0.134191	-0.0956791	-0.550233	0.198668	0.263622	0.36496	-0.116885	0.389409	-0.128181	-0.128181	0.0292503	1.50289				0.13472	0.402105	0.0877465
9.64854	-0.244835	0.428721	0.38974	0.249572	-0.333182	0.0828902	0.20229	0.251146	0.162858	-0.146029	-0.11692	-0.534349	0.204279	0.258364	0.370815	-0.127175	0.414599	-0.122863	-0.122863	0.03635	1.52912				0.134882	0.405238	0.0884301
9.74684	-0.244563	0.414976	0.358552	0.234109	-0.330471	0.0779233	0.222163	0.253701	0.167587	-0.160544	-0.13584	-0.515236	0.205086	0.252097	0.374902	-0.138492	0.439078	-0.116407	-0.116407	0.0400138	1.55322				0.135021	0.408169	0.0890698
9.84515	-0.242096	0.402169	0.328318	0.216207	-0.329108	0.073114	0.239522	0.257119	0.172344	-0.171017	-0.150643	-0.493882	0.20509	0.245368	0.379002	-0.148842	0.458758	-0.104669	-0.104669	0.0459548	1.57804				0.136004	0.410685	0.0896189
9.94345	-0.23781	0.391572	0.295411	0.197549	-0.327494	0.0663298	0.250746	0.263596	0.179706	-0.180226	-0.163941	-0.471159	0.205769	0.239422	0.382183	-0.157241	0.47757	-0.096142	-0.096142	0.0513003	1.60283				0.136849	0.413422	0.090216
10.0418	-0.234052	0.383079	0.26033	0.17975	-0.325028	0.061901	0.262839	0.271748	0.184313	-0.189421	-0.174078	-0.445161	0.205843	0.234553	0.38058	-0.162706	0.500183	-0.0881143	-0.0881143	0.0550878	1.62945				0.138237	0.416539	0.0908963
10.1401	-0.230147	0.376758	0.223683	0.163566	-0.322056	0.0569185	0.276159	0.27792	0.190037	-0.194252	-0.177764	-0.414696	0.204567	0.231012	0.378167	-0.163247	0.523891	-0.0780936	-0.0780936	0.0603802	1.65385				0.140884	0.418795	0.0913887
10.2384	-0.227726	0.372235	0.187389	0.148109	-0.319077	0.0488822	0.286588	0.283631	0.198674	-0.194083	-0.17701	-0.386388	0.206395	0.224528	0.373527	-0.161888	0.54105	-0.0671419	-0.0671419	0.0698773	1.67432				0.143559	0.4202	0.0916952
10.3367	-0.222191	0.362013	0.151834	0.131831	-0.31369	0.0433729	0.295329	0.28601	0.204998	-0.193293	-0.174066	-0.359641	0.206065	0.21619	0.367291	-0.156241	0.554843	-0.0544582	-0.0544582	0.0835611	1.69807				0.146351	0.421569	0.0919938
10.435	-0.218244	0.349717	0.123877	0.119898	-0.306235	0.0354001	0.303195	0.290435	0.214699	-0.186895	-0.169628	-0.334443	0.206189	0.206606	0.361321	-0.149547	0.571721	-0.0419607	-0.0419607	0.097447	1.72389				0.150261	0.423605	0.0924381
10.5333	-0.214168	0.337576	0.0981778	0.10764	-0.298814	0.0301227	0.313006	0.297157	0.223479	-0.18062	-0.164256	-0.309957	0.206633	0.195335	0.352344	-0.143192	0.58267	-0.02884	-0.02884	0.110417	1.75401				0.15428	0.42643	0.0930547
10.6316	-0.214776	0.325307	0.0745705	0.093409	-0.295288	0.0271262	0.321463	0.30654	0.236079	-0.178088	-0.155526	-0.284747	0.208585	0.189651	0.340333	-0.137423	0.589504	-0.0164695	-0.0164695	0.12096	1.782				0.15794	0.429437	0.0937109
10.7299	-0.212385	0.315042	0.048306	0.0821417	-0.296572	0.0257338	0.321918	0.313821	0.247204	-0.173957	-0.145518	-0.258736	0.207567	0.185301	0.325718	-0.131127	0.595565	-0.00728695	-0.00728695	0.130509	1.8036				0.160455	0.431417	0.0941429
10.8282	-0.209041	0.306963	0.0260153	0.0696463	-0.29459	0.0268889	0.324251	0.318153	0.258071	-0.166834	-0.134792	-0.233405	0.20558	0.178765	0.310628	-0.124444	0.596621	-0.00436296	-0.00436296	0.143281	1.82675				0.162847	0.433548	0.094608
10.9265	-0.205732	0.298654	0.0104591	0.0570618	-0.29323	0.0254795	0.330155	0.325885	0.26878	-0.15602	-0.123968	-0.206104	0.207217	0.174034	0.293711	-0.119888	0.591084	-0.0064758	-0.0064758	0.156756	1.85209				0.165404	0.436151	0.0951759
11.0248	-0.201373	0.288134	-0.00371889	0.0465913	-0.293466	0.0233593	0.333998	0.329873	0.283253	-0.148092	-0.109757	-0.178071	0.206582	0.172282	0.275951	-0.113642	0.58925	-0.00731033	-0.00731033	0.1677	1.88475				0.168523	0.440317	0.0960851
11.1231	-0.193529	0.278726	-0.0111379	0.0362315	-0.298279	0.0189239	0.336226	0.328869	0.293019	-0.141884	-0.094822	-0.146834	0.203796	0.165994	0.257784	-0.105618	0.588626	-0.00735678	-0.00735678	0.176989	1.91712				0.171214	0.444437	0.0969841
11.2214	-0.183151	0.267182	-0.0119737	0.0287062	-0.303431	0.0146868	0.339885	0.33055	0.299135	-0.130922	-0.0774345	-0.114981	0.200091	0.158963	0.240833	-0.0945957	0.589044	-0.0105013	-0.0105013	0.184748	1.94668				0.174429	0.447907	0.0977412
11.3197	-0.171537	0.256513	-0.00730988	0.0229529	-0.310057	0.0116045	0.350285	0.335221	0.301727	-0.119624	-0.0608327	-0.0818215	0.196262	0.156838	0.224193	-0.0798261	0.589362	-0.0102016	-0.0102016	0.18769	1.97499				0.178868	0.451144	0.0984476
11.418	-0.16076	0.247522	0.000310291	0.0228804	-0.31237	0.00698722	0.361611	0.341895	0.303545	-0.109904	-0.043497	-0.0516776	0.191128	0.15764	0.204509	-0.0640903	0.588286	-0.0110295	-0.0110295	0.190517	2.00215				0.183554	0.454225	0.0991199
11.5163	-0.149647	0.235973	0.00466028	0.0229651	-0.312168	0.00200507	0.371984	0.347679	0.304724	-0.0985452	-0.0251808	-0.0269467	0.182622	0.157394	0.188741	-0.048573	0.582336	-0.0102373	-0.0102373	0.195544	2.02592				0.187667	0.456575	0.0996329
11.6146	-0.137389	0.232531	0.0142028	0.0221348	-0.31129	-0.00292027	0.381034	0.355605	0.30671	-0.0858763	-0.0068302	-0.00734838	0.17415	0.157917	0.172594	-0.0328102	0.57251	-0.0110881	-0.0110881	0.19631	2.04871				0.191799	0.458835	0.100126
11.7129	-0.12271	0.230029	0.0293658	0.0226247	-0.310432	-0.0103928	0.38639	0.361951	0.30885	-0.0726566	0.0100179	0.00607803	0.167158	0.163982	0.155979	-0.0170531	0.562864	-0.0119984	-0.0119984	0.194021	2.06822				0.195728	0.460547	0.1005
11.8112	-0.107632	0.225366	0.0431771	0.0216407	-0.310071	-0.0150928	0.386076	0.368518	0.312638	-0.0562211	0.025388	0.0158954	0.162435	0.170227	0.140832	0.000626148	0.548952	-0.0132281	-0.0132281	0.194437	2.0895				0.199535	0.462517	0.100929
11.9095	-0.0937321	0.219839	0.0594779	0.0209231	-0.307213	-0.0195225	0.388423	0.376455	0.313645	-0.039667	0.041039	0.0192128	0.156757	0.175721	0.127303	0.0196298	0.537371	-0.0165617	-0.0165617	0.190984	2.1097				0.203011	0.464637	0.101392
12.0078	-0.0819642	0.211387	0.078686	0.0194515	-0.304457	-0.0237966	0.394396	0.381349	0.312092	-0.0237712	0.0580827	0.0206737	0.151092	0.183358	0.112345	0.0382099	0.52427	-0.0200751	-0.0200751	0.188386	2.12822				0.206088	0.466652	0.101832
12.1061	-0.0653416	0.200016	0.100835	0.0198199	-0.30008	-0.030579	0.40069	0.38269	0.313018	-0.0116911	0.0727837	0.0213739	0.145073	0.193267	0.101833	0.055288	0.508119	-0.0237713	-0.0237713	0.190819	2.14528				0.209318	0.468349	0.102202
12.2044	-0.0470036	0.186696	0.12167	0.0190638	-0.290691	-0.0369556	0.40154	0.384506	0.312933	-0.00594781	0.082634	0.0180183	0.137887	0.199823	0.0942654	0.0691183	0.488572	-0.0277438	-0.0277438	0.193814	2.16029				0.211178	0.469703	0.102498
12.3027	-0.0305116	0.171844	0.143506	0.0182551	-0.279296	-0.0373765	0.405743	0.387149	0.309426	-0.00406665	0.091018	0.0170349	0.126788	0.20867	0.0881964	0.0793038	0.472046	-0.0310796	-0.0310796	0.193371	2.17501				0.213045	0.471219	0.102829
12.401	-0.0168522	0.16034	0.163961	0.0184715	-0.26794	-0.0387713	0.413359	0.39167	0.306299	-0.00344769	0.0987463	0.0165617	0.117166	0.21931	0.0833673	0.0873289	0.457008	-0.0326193	-0.0326193	0.191673	2.18952				0.215359	0.473024	0.103222
12.4994	-0.00255019	0.147587	0.179582	0.0149289	-0.255964	-0.041662	0.420467	0.394507	0.303292	-0.00350961	0.105856	0.0164226	0.105942	0.23042	0.080391	0.093941	0.441954	-0.0330168	-0.0330168	0.190574	2.20431				0.217164	0.475067	0.103668
12.5977	0.0146706	0.13944	0.199786	0.0123422	-0.242125	-0.0463928	0.423958	0.395712	0.300564	-0.000198491	0.111481	0.0144447	0.0911492	0.242246	0.0795464	0.0991024	0.429427	-0.0356966	-0.0356966	0.1898	2.21516				0.218987	0.476386	0.103956
12.696	0.0331717	0.13592	0.223513	0.0115706	-0.220082	-0.0497929	0.429126	0.395698	0.292847	0.00873735	0.115521	0.00965548	0.0752471	0.249243	0.0825994	0.102435	0.417356	-0.037851	-0.037851	0.190555	2.22701				0.221649	0.477439	0.104186
12.7943	0.048295	0.130327	0.249353	0.010876	-0.190326	-0.0513708	0.435388	0.395397	0.286042	0.0168982	0.11918	0.00325535	0.0578428	0.256989	0.0880872	0.107725	0.404792	-0.0352367	-0.0352367	0.192561	2.24298				0.22542	0.479024	0.104532
12.8926	0.0619526	0.126409	0.271223	0.0127676	-0.164175	-0.0510936	0.438382	0.397846	0.280722	0.0235325	0.120796	-0.00633569	0.0395077	0.266553	0.094647	0.112374	0.394262	-0.0235722	-0.0235722	0.19105	2.25661				0.229518	0.480121	0.104771
12.9909	0.0743499	0.124858	0.28769	0.013978	-0.136779	-0.0462668	0.438902	0.399634	0.277416	0.0300707	0.122117	-0.0211693	0.0209998	0.277602	0.10455	0.118051	0.390399	-0.00734214	-0.00734214	0.188571	2.26793				0.234201	0.480704	0.104898
13.0892	0.0879486	0.121882	0.303473	0.0168016	-0.109222	-0.0424928	0.443207	0.403802	0.272614	0.0409186	0.122032	-0.0375027	0.00718815	0.288313	0.116308	0.123213	0.377327	0.0077514	0.0077514	0.186995	2.27681				0.238815	0.480873	0.104935
13.1875	0.099187	0.116409	0.318295	0.0196605	-0.0777633	-0.0365145	0.448451	0.411146	0.271703	0.0505079	0.12156	-0.0602077	-0.00303947	0.305489	0.129	0.125348	0.360673	0.0241064	0.0241064	0.182817	2.28533				0.243632	0.481268	0.105021
13.2858	0.109688	0.11399	0.328555	0.0209302	-0.0423702	-0.0285575	0.448108	0.415613	0.275965	0.0555288	0.120115	-0.083934	-0.0128788	0.324267	0.139954	0.124656	0.348023	0.044939	0.044939	0.179165	2.29552				0.248677	0.481997	0.10518
13.3841	0.118891	0.113244	0.334933	0.0235746	-0.00742003	-0.0226641	0.44245	0.418403	0.282274	0.0597634	0.119633	-0.108588	-0.0221864	0.338337	0.149797	0.120516	0.335153	0.0646144	0.0646144	0.180416	2.30282				0.252789	0.482387	0.105265
13.4824	0.124608	0.108833	0.340001	0.0272349	0.0264819	-0.0193724	0.434804	0.419573	0.289551	0.0671364	0.117457	-0.133007	-0.0304481	0.352477	0.162317	0.114536	0.322011	0.0816982	0.0816982	0.179927	2.31381				0.256254	0.483957	0.105608
13.5807	0.130662	0.104839	0.347354	0.0315996	0.0603307	-0.0166086	0.423239	0.420749	0.297006	0.0725495	0.115216	-0.156885	-0.0361389	0.366599	0.173717	0.109062	0.314344	0.0965057	0.0965057	0.180257	2.33193				0.260135	0.487251	0.106327
13.679	0.139261	0.0944191	0.352634	0.0380146	0.0902475	-0.0130126	0.413145	0.419226	0.303756	0.0748029	0.112916	-0.177888	-0.0368599	0.381694	0.185655	0.10244	0.309652	0.11169	0.11169	0.181645	2.34663				0.263893	0.489956	0.106917
13.7773	0.145671	0.0838196	0.355675	0.0430574	0.11925	-0.00750003	0.403654	0.419022	0.306565	0.0775817	0.113462	-0.194937	-0.0359612	0.395666	0.197638	0.0937242	0.306954	0.129089	0.129089	0.185661	2.36118				0.268017	0.492546	0.107482
13.8756	0.151318	0.0741372	0.361741	0.0516109	0.15075	-0.0041115	0.395085	0.415434	0.306733	0.0809703	0.115018	-0.212083	-0.0341397	0.409652	0.206075	0.0832275	0.310877	0.147249	0.147249	0.191267	2.37526				0.272539	0.495176	0.108056
13.9739	0.158153	0.0643793	0.366565	0.0618349	0.178932	-0.00220058	0.381785	0.412361	0.309936	0.0817178	0.115393	-0.224029	-0.031823	0.422299	0.211123	0.0713976	0.31516	0.163196	0.163196	0.200403	2.38544				0.276439	0.497074	0.10847
14.0722	0.167148	0.0572508	0.370571	0.073874	0.206896	0.000734142	0.367542	0.409424	0.314176	0.0814077	0.113539	-0.234486	-0.0253051	0.43112	0.216228	0.0579902	0.322639	0.183002	0.183002	0.207826	2.39794				0.281072	0.49927	0.10895
14.1705	0.172187	0.0529042	0.37348	0.0845656	0.23275	0.00511698	0.352822	0.410864	0.316131	0.0844564	0.108784	-0.244845	-0.0183479	0.435959	0.221482	0.0456191	0.334033	0.200945	0.200945	0.210845	2.40901				0.285224	0.501363	0.109406
14.2688	0.177722	0.0490105	0.37642	0.0982807	0.254555	0.00959626	0.339799	0.41293	0.320758	0.0911633	0.107117	-0.256922	-0.00675573	0.446777	0.225555	0.0331769	0.346488	0.215498	0.215498	0.209398	2.4253				0.290065	0.504668	0.110128
14.3671	0.186923	0.0464759	0.376673	0.113341	0.275233	0.0109827	0.327589	0.413201	0.329025	0.0998995	0.105847	-0.27122	0.00801999	0.457034	0.229006	0.0216338	0.357737	0.228765	0.228765	0.210733	2.44417				0.29523	0.508557	0.110976
14.4654	0.197456	0.0434732	0.375608	0.12844	0.297266	0.0112434	0.313174	0.410927	0.339127	0.109548	0.103931	-0.287343	0.0238974	0.463562	0.232501	0.00758309	0.368783	0.236135	0.236135	0.206686	2.4596				0.29894	0.512094	0.111748
14.5637	0.209994	0.0434289	0.377047	0.14708	0.316467	0.013494	0.298716	0.407543	0.346077	0.116001	0.103265	-0.30409	0.0448701	0.46684	0.235486	-0.00518164	0.377915	0.241491	0.241491	0.199762	2.47518				0.302518	0.515533	0.112498
14.662	0.222702	0.0409738	0.374584	0.161564	0.333774	0.0141876	0.288726	0.403321	0.35312	0.115291	0.102665	-0.319381	0.0710037	0.471799	0.238421	-0.0171174	0.386406	0.243951	0.243951	0.189706	2.4931				0.305369	0.519718	0.113412
14.7603	0.23581	0.0364047	0.371061	0.176657	0.343711	0.0131323	0.277258	0.39769	0.363623	0.111169	0.102058	-0.33192	0.0994544	0.481724	0.240611	-0.0263305	0.394784	0.244304	0.244304	0.179279	2.50783				0.307744	0.523387	0.114212
14.8586	0.249492	0.0334933	0.37025	0.195692	0.346947	0.0106525	0.270172	0.393256	0.371771	0.107231	0.102981	-0.344936	0.130357	0.490465	0.240734	-0.0369641	0.402679	0.241162	0.241162	0.165883	2.52351				0.309809	0.527416	0.115092
14.957	0.264577	0.0293171	0.369418	0.214769	0.351486	0.0061882	0.267795	0.38941	0.377212	0.102959	0.107329	-0.353457	0.161045	0.499668	0.241804	-0.0467781	0.404391	0.228359	0.228359	0.155132	2.53989				0.311375	0.531525	0.115988
15.0553	0.281766	0.0234639	0.374122	0.235772	0.354228	-0.000112572	0.267139	0.381388	0.381197	0.095509	0.112148	-0.356602	0.188831	0.506602	0.240221	-0.0564547	0.400535	0.212775	0.212775	0.145879	2.55517				0.312207	0.535385	0.116831
15.1536	0.294266	0.02233	0.383323	0.255181	0.356163	-0.00131834	0.26252	0.372736	0.389177	0.0847488	0.118025	-0.359954	0.217247	0.508749	0.236363	-0.0677124	0.403777	0.195828	0.195828	0.138555	2.56733				0.313008	0.538743	0.117563
15.2519	0.305655	0.0252972	0.392508	0.276977	0.356813	-0.00455866	0.257122	0.362226	0.395036	0.0753364	0.12178	-0.35899	0.244221	0.504887	0.230505	-0.0771876	0.407743	0.17306	0.17306	0.133117	2.58014				0.313083	0.542092	0.118294
15.3502	0.315886	0.0253317	0.403844	0.298483	0.356897	-0.0114074	0.25628	0.349623	0.395237	0.0683944	0.126707	-0.356644	0.269138	0.500067	0.22433	-0.0838523	0.406689	0.146306	0.146306	0.128003	2.5891				0.31213	0.544853	0.118897
15.4485	0.328017	0.02394	0.416393	0.319714	0.355487	-0.0157424	0.258299	0.335119	0.393716	0.0605746	0.130113	-0.354934	0.295821	0.494396	0.218884	-0.0887018	0.406694	0.118013	0.118013	0.120819	2.5995				0.311149	0.548196	0.119626
15.5468	0.343477	0.0250418	0.426127	0.338073	0.351446	-0.0193421	0.260521	0.320489	0.390691	0.0482577	0.135237	-0.35006	0.322286	0.486281	0.21222	-0.0931937	0.407042	0.0918984	0.0918984	0.115083	2.60706				0.310025	0.550885	0.120213
15.6451	0.35861	0.0285648	0.433627	0.356069	0.346796	-0.0201803	0.269347	0.306411	0.386655	0.0357725	0.140576	-0.341025	0.346456	0.477398	0.203648	-0.0985545	0.399854	0.0665462	0.0665462	0.107891	2.60764				0.308507	0.552	0.120456
15.7434	0.370261	0.036748	0.441131	0.37182	0.34395	-0.019677	0.274651	0.293145	0.38372	0.0265122	0.146671	-0.332188	0.368027	0.467162	0.196192	-0.104802	0.392165	0.0411684	0.0411684	0.103721	2.61098				0.307263	0.553638	0.120814
15.8417	0.384091	0.0450463	0.45271	0.386873	0.342355	-0.019251	0.28321	0.281003	0.383524	0.0138662	0.150511	-0.32514	0.387509	0.455512	0.192047	-0.110404	0.386155	0.0126063	0.0126063	0.0981897	2.62015				0.306341	0.557067	0.121562
15.94	0.397815	0.0528764	0.462347	0.397712	0.336565	-0.0175902	0.296182	0.273682	0.384994	-0.00341354	0.154665	-0.315819	0.403349	0.442908	0.188657	-0.115689	0.374046	-0.0186143	-0.0186143	0.0915789	2.62776				0.304542	0.560414	0.122292
16.0383	0.409403	0.0630596	0.469617	0.404082	0.331525	-0.0156912	0.315948	0.261468	0.383233	-0.0178567	0.157826	-0.309593	0.416894	0.432291	0.186402	-0.120729	0.360156	-0.0460895	-0.0460895	0.0842624	2.63781				0.302758	0.564247	0.123129
16.1366	0.418986	0.0749564	0.475778	0.405608	0.326285	-0.0162434	0.337124	0.252509	0.381373	-0.0265151	0.164062	-0.304734	0.421572	0.424224	0.184742	-0.125113	0.344548	-0.0761137	-0.0761137	0.0802247	2.64729				0.300688	0.568029	0.123954
16.2349	0.430489	0.0852209	0.480938	0.407505	0.322259	-0.0163744	0.35729	0.240598	0.379457	-0.0338186	0.17477	-0.300294	0.424865	0.417115	0.18186	-0.130813	0.325834	-0.104426	-0.104426	0.0774592	2.66061				0.298863	0.572683	0.12497
16.3332	0.437627	0.0968522	0.489964	0.406109	0.319053	-0.0167696	0.377425	0.225496	0.375336	-0.0412143	0.183891	-0.293085	0.424798	0.402806	0.178392	-0.136513	0.307497	-0.126841	-0.126841	0.0793084	2.67074				0.296858	0.576192	0.125735
16.4315	0.442336	0.108917	0.50187	0.40148	0.315991	-0.0188638	0.393187	0.210088	0.366065	-0.0513868	0.193977	-0.285848	0.425177	0.384644	0.174189	-0.14072	0.289905	-0.152327	-0.152327	0.0776531	2.67938				0.293495	0.579861	0.126536
16.5298	0.445921	0.120512	0.516124	0.397665	0.311303	-0.0193684	0.407701	0.197847	0.352409	-0.0625964	0.205975	-0.275436	0.422472	0.367991	0.170253	-0.142446	0.274742	-0.174952	-0.174952	0.083873	2.69085				0.291233	0.583641	0.127361
16.6281	0.446522	0.131176	0.527687	0.389143	0.307197	-0.0184063	0.42326	0.18848	0.340728	-0.0718344	0.217103	-0.264336	0.413745	0.356052	0.163262	-0.145065	0.26143	-0.194261	-0.194261	0.0941458	2.70037				0.289149	0.586705	0.12803
16.7264	0.44474	0.141753	0.53794	0.383838	0.303294	-0.0148469	0.437237	0.180039	0.330335	-0.0733779	0.227604	-0.253136	0.398955	0.340278	0.157042	-0.148175	0.246499	-0.207561	-0.207561	0.108499	2.70694				0.287635	0.588426	0.128405
16.8247	0.441015	0.15388	0.54664	0.376043	0.30412	-0.013037	0.454036	0.173118	0.317994	-0.0762145	0.238124	-0.243568	0.384493	0.320163	0.150483	-0.150962	0.234782	-0.217997	-0.217997	0.123199	2.71445				0.286322	0.590315	0.128817
16.923	0.436525	0.164076	0.549228	0.362998	0.308488	-0.0101247	0.467763	0.164104	0.305138	-0.0792442	0.246095	-0.232464	0.372325	0.304137	0.145782	-0.154237	0.224796	-0.227883	-0.227883	0.142107	2.71663				0.284683	0.590994	0.128966
17.0213	0.431404	0.17315	0.55551	0.352168	0.313253	-0.0085923	0.477056	0.155004	0.295466	-0.0799822	0.252051	-0.224407	0.361517	0.288357	0.141305	-0.159983	0.219923	-0.231872	-0.231872	0.159796	2.71833				0.283695	0.591452	0.129066
17.1196	0.425604	0.184666	0.560519	0.342154	0.319831	-0.00714672	0.482516	0.15077	0.286727	-0.0758689	0.255458	-0.219651	0.352939	0.272505	0.137834	-0.166331	0.222105	-0.234101	-0.234101	0.179184	2.72245				0.283717	0.592159	0.12922
17.2179	0.426017	0.194558	0.559522	0.332291	0.328596	-0.00926147	0.488593	0.142409	0.273551	-0.0702141	0.254013	-0.213787	0.342021	0.260541	0.13828	-0.169961	0.22255	-0.235172	-0.235172	0.198816	2.73038				0.283741	0.593485	0.129509
17.3162	0.429	0.203516	0.555869	0.318215	0.335499	-0.00686601	0.497501	0.134697	0.261611	-0.0611421	0.253532	-0.20881	0.331615	0.250152	0.141141	-0.173492	0.22557	-0.230861	-0.230861	0.220533	2.73678				0.284914	0.593936	0.129608
17.4146	0.433305	0.214384	0.550752	0.304856	0.340104	-0.000598882	0.506484	0.133287	0.252138	-0.0507196	0.251392	-0.203607	0.323909	0.238138	0.143185	-0.179214	0.231924	-0.226073	-0.226073	0.241419	2.74503				0.286858	0.594675	0.129769
17.5129	0.434684	0.226098	0.545845	0.287676	0.346456	0.00384522	0.51238	0.136417	0.244925	-0.0385183	0.249764	-0.197605	0.313457	0.230531	0.145514	-0.184095	0.236091	-0.218056	-0.218056	0.262824	2.75565				0.289325	0.595497	0.129948
17.6112	0.433897	0.239468	0.544838	0.272037	0.355696	0.011043	0.518025	0.137965	0.239753	-0.0236135	0.247052	-0.19466	0.303447	0.222429	0.148735	-0.187121	0.241439	-0.207717	-0.207717	0.283225	2.76593				0.292579	0.596165	0.130094
17.7095	0.433304	0.251993	0.544693	0.254851	0.36548	0.0158338	0.5189	0.141276	0.234613	-0.00790479	0.241243	-0.194841	0.293873	0.213333	0.153247	-0.18936	0.25169	-0.196862	-0.196862	0.304637	2.77522				0.295636	0.596758	0.130223
17.8078	0.4331	0.262333	0.544153	0.240706	0.377322	0.0203007	0.522862	0.145808	0.2279	0.00574179	0.234196	-0.196245	0.284506	0.201427	0.157477	-0.187934	0.260399	-0.183534	-0.183534	0.322976	2.78298				0.298711	0.597036	0.130284
17.9061	0.431528	0.274357	0.537809	0.227165	0.387675	0.0253605	0.52453	0.148903	0.219387	0.0213916	0.229339	-0.197306	0.27611	0.189128	0.157923	-0.18487	0.26473	-0.169735	-0.169735	0.340798	2.78497				0.300926	0.596019	0.130062
18.0044	0.430837	0.287351	0.53178	0.215868	0.399394	0.0293495	0.521564	0.149695	0.209647	0.0400594	0.22481	-0.199091	0.270327	0.180499	0.161294	-0.18045	0.27109	-0.156269	-0.156269	0.357935	2.78666				0.303623	0.594913	0.129821
18.1027	0.43252	0.299136	0.526759	0.208646	0.413166	0.0315953	0.515136	0.155166	0.204446	0.0540675	0.22283	-0.197336	0.26658	0.173444	0.166431	-0.176397	0.279229	-0.14437	-0.14437	0.372027	2.78898				0.307033	0.59397	0.129615
18.201	0.437369	0.308293	0.520625	0.206828	0.426067	0.0368228	0.506088	0.159463	0.199512	0.0587966	0.217621	-0.195467	0.264935	0.167466	0.173979	-0.172166	0.285052	-0.133442	-0.133442	0.381408	2.79091				0.309844	0.593096	0.129424
18.2993	0.44206	0.31899	0.516268	0.204768	0.438658	0.0410478	0.497553	0.162495	0.199368	0.0611515	0.208948	-0.194486	0.263837	0.162843	0.181807	-0.167415	0.288775	-0.122045	-0.122045	0.391577	2.78919				0.312541	0.591636	0.129106
18.3976	0.452756	0.331351	0.508244	0.203308	0.450922	0.0474306	0.493883	0.168955	0.200064	0.0638688	0.200008	-0.193439	0.262621	0.164187	0.188806	-0.161958	0.294515	-0.116428	-0.116428	0.398637	2.78591				0.315582	0.590176	0.128787
18.4959	0.462901	0.343368	0.498605	0.207078	0.462433	0.0561209	0.496123	0.177597	0.204483	0.069939	0.188675	-0.194039	0.259135	0.170792	0.198679	-0.15777	0.296827	-0.106642	-0.106642	0.40817	2.78117				0.319857	0.588091	0.128332
18.5942	0.474906	0.357473	0.487815	0.208102	0.470966	0.0624363	0.502933	0.186472	0.214648	0.0767824	0.172915	-0.196954	0.257288	0.1815	0.209293	-0.153741	0.295326	-0.0963481	-0.0963481	0.409525	2.77167				0.32365	0.585181	0.127697
18.6925	0.490288	0.372256	0.479349	0.212119	0.481231	0.0658277	0.507067	0.197038	0.224	0.0839501	0.15699	-0.199945	0.25922	0.192663	0.221491	-0.147952	0.29532	-0.0880715	-0.0880715	0.410064	2.76032				0.327865	0.582096	0.127024
18.7908	0.509514	0.387845	0.473237	0.217688	0.493266	0.069128	0.512161	0.208745	0.231757	0.0886568	0.143925	-0.205229	0.266455	0.205718	0.232914	-0.140649	0.294438	-0.082113	-0.082113	0.407279	2.75322				0.332659	0.580208	0.126612
18.8891	0.530749	0.402041	0.468499	0.225665	0.502191	0.0760373	0.516345	0.220027	0.241883	0.0945265	0.131735	-0.209759	0.270108	0.219043	0.242897	-0.135011	0.288813	-0.0784749	-0.0784749	0.401537	2.74774				0.337053	0.578794	0.126303
18.9874	0.55346	0.417635	0.468597	0.234819	0.507868	0.0817023	0.521064	0.231969	0.254862	0.0980996	0.120868	-0.214709	0.26895	0.227949	0.250213	-0.127777	0.282702	-0.0762618	-0.0762618	0.394795	2.74466				0.3412	0.578162	0.126165
19.0857	0.573951	0.434055	0.465387	0.240083	0.512697	0.0881661	0.531147	0.244368	0.264328	0.100173	0.109799	-0.220709	0.269595	0.236235	0.254286	-0.118331	0.276656	-0.0751093	-0.0751093	0.387551	2.74115				0.344779	0.577677	0.126059
19.184	0.591708	0.449014	0.460363	0.242461	0.514991	0.0935242	0.546598	0.255967	0.272221	0.0976718	0.102739	-0.225728	0.269518	0.244474	0.259095	-0.109211	0.265774	-0.0752601	-0.0752601	0.379497	2.73558				0.347416	0.577022	0.125916
19.2823	0.606558	0.465005	0.460598	0.246404	0.513622	0.0992575	0.561293	0.269876	0.283822	0.0932194	0.100408	-0.231589	0.267902	0.252971	0.260715	-0.102791	0.254628	-0.0728023	-0.0728023	0.369515	2.72645				0.350108	0.575584	0.125603
19.3806	0.619025	0.479224	0.463542	0.253893	0.51299	0.100117	0.570345	0.283481	0.293944	0.0837295	0.10048	-0.236689	0.265879	0.264574	0.259422	-0.0978779	0.243201	-0.0704413	-0.0704413	0.357156	2.71852				0.352099	0.574525	0.125372
19.4789	0.6273	0.492338	0.466984	0.262736	0.511855	0.099193	0.575645	0.290755	0.30587	0.0715124	0.101998	-0.244341	0.260537	0.27597	0.260834	-0.0931094	0.228176	-0.0643943	-0.0643943	0.346768	2.71314				0.353589	0.573896	0.125234
19.5772	0.634353	0.507653	0.472649	0.276149	0.508651	0.101869	0.585352	0.293917	0.315734	0.056208	0.103827	-0.251915	0.253111	0.28589	0.262937	-0.0919826	0.211684	-0.0607596	-0.0607596	0.33714	2.70397				0.354556	0.573036	0.125047
19.6755	0.642048	0.519001	0.476362	0.287977	0.504669	0.103539	0.595112	0.299733	0.324676	0.0401113	0.106502	-0.260433	0.244243	0.299095	0.26505	-0.0920459	0.194845	-0.0611784	-0.0611784	0.32788	2.692				0.354667	0.572095	0.124841
19.7738	0.64814	0.528288	0.482424	0.301066	0.498996	0.107447	0.604639	0.301499	0.33511	0.0214213	0.110844	-0.268673	0.234124	0.312491	0.267692	-0.0931999	0.175382	-0.063076	-0.063076	0.317832	2.68313				0.354405	0.572	0.124821
19.8722	0.655454	0.53952	0.492965	0.311537	0.488841	0.10914	0.611932	0.30222	0.344671	0.00357455	0.114316	-0.276688	0.22361	0.331505	0.269384	-0.0986502	0.158447	-0.0685146	-0.0685146	0.31042	2.67605				0.353868	0.572817	0.124999
19.9705	0.661477	0.548329	0.504556	0.322814	0.480378	0.108615	0.618167	0.301747	0.355361	-0.0134381	0.113519	-0.285921	0.211121	0.351089	0.273444	-0.106076	0.144962	-0.0730155	-0.0730155	0.3038	2.66901				0.353187	0.573864	0.125227
20.0688	0.662583	0.55679	0.515283	0.334289	0.474414	0.106862	0.626032	0.301891	0.367104	-0.0317317	0.110153	-0.295574	0.196368	0.364589	0.27807	-0.113569	0.132452	-0.0750775	-0.0750775	0.297014	2.66595				0.352324	0.575713	0.125631
20.1671	0.661911	0.566385	0.527494	0.343721	0.467964	0.108724	0.635156	0.300064	0.376409	-0.0467624	0.104311	-0.30702	0.180536	0.374603	0.282041	-0.119617	0.118941	-0.0776431	-0.0776431	0.294114	2.66614				0.35142	0.578296	0.126195
20.2654	0.658813	0.577039	0.542996	0.351008	0.461787	0.108034	0.64171	0.295248	0.38432	-0.0552231	0.0995677	-0.315855	0.169722	0.384219	0.282871	-0.126644	0.106735	-0.0801256	-0.0801256	0.293605	2.66841				0.350863	0.580949	0.126773
20.3637	0.650146	0.58638	0.557974	0.35977	0.45735	0.108547	0.647008	0.292642	0.38605	-0.0619065	0.0971902	-0.323849	0.160965	0.394184	0.283612	-0.133473	0.0952807	-0.0848053	-0.0848053	0.293084	2.6708				0.350102	0.583413	0.127311
20.462	0.635751	0.592085	0.573547	0.369057	0.452076	0.106002	0.649249	0.288678	0.3902	-0.068987	0.0940871	-0.332961	0.155101	0.401745	0.28581	-0.142334	0.082332	-0.0865787	-0.0865787	0.296052	2.6764				0.349083	0.586272	0.127935
20.5603	0.623446	0.596231	0.589913	0.374203	0.447092	0.102833	0.644297	0.28295	0.395721	-0.0797178	0.0912674	-0.33994	0.151557	0.409341	0.285151	-0.149565	0.0745366	-0.0874109	-0.0874109	0.298347	2.68455				0.347971	0.589301	0.128596
20.6586	0.610824	0.595588	0.605897	0.382559	0.447212	0.102372	0.633723	0.274933	0.396889	-0.0880925	0.0904691	-0.344533	0.145865	0.412851	0.284384	-0.156028	0.0668611	-0.0890814	-0.0890814	0.30705	2.6986				0.347108	0.593014	0.129406
20.7569	0.594965	0.593755	0.622799	0.390888	0.445707	0.103003	0.625368	0.263667	0.399908	-0.0943781	0.0904896	-0.348906	0.137772	0.411221	0.284544	-0.162913	0.0567559	-0.0901098	-0.0901098	0.316088	2.71457				0.345956	0.597067	0.130291
20.8552	0.573631	0.589781	0.640646	0.395781	0.440528	0.103945	0.614295	0.25026	0.402723	-0.101213	0.0863651	-0.349553	0.126272	0.409923	0.286327	-0.169804	0.0465627	-0.0904106	-0.0904106	0.328444	2.72799				0.343909	0.600407	0.13102
20.9535	0.550202	0.585718	0.656895	0.397713	0.437	0.100566	0.598992	0.237727	0.406187	-0.106893	0.0819921	-0.350323	0.116855	0.410081	0.290904	-0.177918	0.0409571	-0.0900403	-0.0900403	0.344129	2.74136				0.342003	0.603597	0.131716
21.0518	0.523481	0.582613	0.670623	0.400022	0.437819	0.0966999	0.580899	0.22692	0.409477	-0.110026	0.0769393	-0.35287	0.111835	0.410578	0.297194	-0.185922	0.0345134	-0.0841379	-0.0841379	0.35837	2.75331				0.340676	0.606104	0.132263
21.1501	0.499578	0.580825	0.687227	0.403389	0.438057	0.0938875	0.557665	0.215297	0.414631	-0.113522	0.0728512	-0.353175	0.104014	0.409762	0.30726	-0.192877	0.0265855	-0.0756048	-0.0756048	0.373588	2.76658				0.34002	0.608783	0.132847
21.2484	0.479935	0.57785	0.703725	0.409275	0.440285	0.0935492	0.531172	0.202434	0.419539	-0.115118	0.0645024	-0.354494	0.0972126	0.410715	0.319451	-0.197302	0.0209288	-0.0662767	-0.0662767	0.387384	2.78049				0.339952	0.611573	0.133456
21.3467	0.456299	0.572374	0.713606	0.412045	0.446486	0.0935353	0.507722	0.190751	0.420081	-0.112887	0.0549643	-0.355576	0.0922976	0.412103	0.332238	-0.198034	0.0150729	-0.0601154	-0.0601154	0.400454	2.7964				0.339509	0.614537	0.134103
21.445	0.432108	0.571433	0.722082	0.413448	0.454164	0.0948401	0.488267	0.180963	0.420025	-0.108702	0.0425319	-0.356342	0.0892085	0.410216	0.346458	-0.198055	0.00551913	-0.0557236	-0.0557236	0.409477	2.81417				0.339065	0.618129	0.134887
21.5433	0.411782	0.574618	0.732509	0.410717	0.464667	0.0964165	0.472502	0.176754	0.415484	-0.105219	0.0287712	-0.354548	0.0902599	0.411015	0.358922	-0.195732	6.96601e-05	-0.0538427	-0.0538427	0.414746	2.82999				0.339335	0.621355	0.135591
21.6416	0.394986	0.571248	0.737547	0.401738	0.477797	0.0934673	0.451436	0.175201	0.412342	-0.0974814	0.0146021	-0.353136	0.0964227	0.409196	0.370381	-0.189832	-0.00164729	-0.049535	-0.049535	0.418135	2.84818				0.339596	0.624258	0.136224
21.7399	0.379704	0.569761	0.744141	0.39372	0.489327	0.0898934	0.430163	0.174127	0.408531	-0.0899026	-0.000458431	-0.349543	0.103322	0.405332	0.380724	-0.183795	0.000407302	-0.0412792	-0.0412792	0.422659	2.87239				0.340854	0.628079	0.137058
21.8382	0.367585	0.572317	0.747968	0.38517	0.503533	0.0847323	0.409074	0.176427	0.402683	-0.0802313	-0.013006	-0.345639	0.113652	0.406464	0.391544	-0.175645	0.00351929	-0.0338299	-0.0338299	0.426414	2.89685				0.343131	0.631835	0.137878
21.9365	0.356507	0.574597	0.745031	0.377302	0.520446	0.0800591	0.388572	0.180938	0.398741	-0.0702232	-0.0248544	-0.342513	0.122549	0.404908	0.40212	-0.162977	0.00651534	-0.0235381	-0.0235381	0.426688	2.9184				0.345511	0.634639	0.13849
22.0348	0.346495	0.580628	0.744276	0.368025	0.536397	0.0772336	0.370507	0.185961	0.395081	-0.0613013	-0.034076	-0.338885	0.135183	0.404112	0.410866	-0.148369	0.00837702	-0.0107471	-0.0107471	0.425455	2.94417				0.348983	0.638162	0.139258
22.1331	0.342194	0.588163	0.743955	0.355129	0.549679	0.0764148	0.352726	0.190223	0.391258	-0.0490914	-0.0403369	-0.336169	0.152003	0.40996	0.415323	-0.135732	0.0107501	-9.43564e-06	-9.43564e-06	0.421239	2.96765				0.352634	0.6413	0.139943
22.2314	0.337798	0.593012	0.738553	0.342023	0.56162	0.0723122	0.334048	0.196224	0.385943	-0.0345815	-0.0461177	-0.334713	0.170056	0.418993	0.419641	-0.123955	0.0138645	0.00919059	0.00919059	0.414046	2.98934				0.355547	0.644111	0.140557
22.3298	0.331053	0.595124	0.729784	0.329173	0.574647	0.0692554	0.321105	0.205036	0.381563	-0.0210703	-0.0511313	-0.336192	0.185976	0.425263	0.424562	-0.109928	0.0207982	0.0213604	0.0213604	0.405088	3.01026				0.358718	0.646572	0.141094
22.4281	0.329748	0.5978	0.718689	0.312549	0.583504	0.0666875	0.309287	0.214326	0.378968	-0.00821621	-0.0555815	-0.339049	0.196342	0.432907	0.429409	-0.0952247	0.0306559	0.0355374	0.0355374	0.393627	3.03199				0.361881	0.649147	0.141656
22.5264	0.329333	0.606155	0.709236	0.294331	0.589813	0.0662855	0.295078	0.221863	0.370303	0.00410568	-0.0584003	-0.341454	0.204661	0.441142	0.433532	-0.0756699	0.0431516	0.0507715	0.0507715	0.380694	3.05206				0.365132	0.651324	0.142131
22.6247	0.325469	0.616336	0.698435	0.27649	0.593621	0.0654054	0.284427	0.231487	0.35753	0.0188774	-0.058523	-0.342373	0.211767	0.445834	0.437614	-0.0570004	0.0490055	0.0632381	0.0632381	0.365489	3.07085				0.367486	0.653434	0.142591
22.723	0.320177	0.632531	0.685251	0.257579	0.596609	0.0646409	0.27652	0.243354	0.344991	0.0321864	-0.0542261	-0.344371	0.221574	0.451774	0.439796	-0.0407285	0.0561994	0.0792515	0.0792515	0.34756	3.08807				0.37038	0.655237	0.142984
22.8213	0.316794	0.650743	0.670126	0.238238	0.601023	0.0665646	0.26997	0.255347	0.330819	0.0426486	-0.0503637	-0.345814	0.233584	0.461171	0.441409	-0.0268932	0.0647381	0.094424	0.094424	0.330392	3.10403				0.373494	0.65706	0.143382
22.9196	0.314435	0.672255	0.652705	0.219868	0.606821	0.0680214	0.26373	0.268136	0.318365	0.0534131	-0.042291	-0.348925	0.247372	0.471171	0.440231	-0.0133067	0.0777708	0.112456	0.112456	0.308033	3.11602				0.377082	0.658069	0.143602
23.0179	0.314122	0.695454	0.636189	0.202783	0.61241	0.0721399	0.260463	0.280217	0.298978	0.0621883	-0.0349505	-0.350724	0.260775	0.48131	0.436518	0.00520865	0.0907127	0.133572	0.133572	0.284678	3.1289				0.381167	0.659235	0.143857
23.1162	0.315091	0.719333	0.618704	0.185296	0.614365	0.077814	0.261793	0.291439	0.277817	0.0724035	-0.026393	-0.351023	0.272298	0.493797	0.433327	0.0220097	0.104663	0.150438	0.150438	0.262825	3.14333				0.385227	0.660909	0.144222
23.2145	0.315919	0.741179	0.596842	0.169476	0.617324	0.0822316	0.268057	0.302031	0.257725	0.084144	-0.0189121	-0.349764	0.284472	0.508463	0.425749	0.0372837	0.116361	0.166558	0.166558	0.239885	3.15551				0.388909	0.662278	0.144521
23.3128	0.312196	0.7668	0.575183	0.152766	0.619772	0.0859197	0.277152	0.311582	0.241265	0.0948732	-0.00754445	-0.345604	0.297135	0.522963	0.412897	0.0514127	0.128342	0.183644	0.183644	0.215006	3.16685				0.392679	0.663597	0.144809
23.4111	0.314743	0.793527	0.555473	0.139674	0.619609	0.0901207	0.284896	0.32213	0.226227	0.1027	0.00320659	-0.341946	0.309534	0.534677	0.400108	0.0605028	0.142529	0.201912	0.201912	0.19109	3.17378				0.396495	0.664319	0.144966
23.5094	0.32028	0.813859	0.535127	0.12658	0.618778	0.0952527	0.289704	0.329565	0.21483	0.112251	0.0155787	-0.339662	0.31883	0.546169	0.388232	0.0719573	0.157522	0.223803	0.223803	0.175142	3.17834				0.400759	0.664286	0.144959
23.6077	0.323663	0.83153	0.510747	0.116555	0.613722	0.0979623	0.291997	0.333213	0.206238	0.124715	0.0278661	-0.336525	0.325924	0.556575	0.377467	0.0814991	0.167504	0.24563	0.24563	0.159318	3.18188				0.403958	0.664118	0.144922
23.706	0.325933	0.856634	0.489398	0.113095	0.60631	0.100823	0.298799	0.33408	0.19769	0.136474	0.0399069	-0.333366	0.330277	0.566074	0.367068	0.0875126	0.178659	0.266916	0.266916	0.145715	3.17974				0.407365	0.663143	0.14471
23.8043	0.325572	0.881248	0.466239	0.111666	0.599631	0.10446	0.309997	0.333131	0.190219	0.150331	0.0532902	-0.329753	0.332353	0.578138	0.356289	0.0948754	0.18664	0.289235	0.289235	0.133796	3.17622				0.411086	0.661908	0.14444
23.9026	0.322015	0.90326	0.439836	0.113095	0.589827	0.10951	0.323796	0.330861	0.182089	0.167352	0.0625654	-0.323609	0.330095	0.585803	0.343675	0.101157	0.192852	0.314577	0.314577	0.12238	3.17398				0.414271	0.660825	0.144204
24.0009	0.316091	0.922896	0.416549	0.114102	0.580433	0.114119	0.339971	0.326258	0.175404	0.181525	0.0716842	-0.313795	0.32667	0.593316	0.329668	0.10227	0.200152	0.33944	0.33944	0.112952	3.17462				0.417322	0.66043	0.144118
24.0992	0.311111	0.938715	0.389971	0.117141	0.569704	0.117464	0.354466	0.325485	0.168515	0.196986	0.0821831	-0.302753	0.319877	0.599713	0.31444	0.104209	0.207579	0.36141	0.36141	0.107404	3.17016				0.419771	0.658876	0.143778
24.1975	0.303502	0.954499	0.364193	0.123037	0.559452	0.120664	0.367314	0.324585	0.162265	0.21234	0.090478	-0.289254	0.309525	0.599483	0.302205	0.106893	0.213176	0.388472	0.388472	0.106802	3.16252				0.422411	0.656584	0.143278
24.2958	0.29719	0.973201	0.34567	0.130418	0.548741	0.126658	0.37994	0.322938	0.157942	0.223572	0.0979531	-0.273695	0.298501	0.59452	0.288405	0.109543	0.222338	0.421598	0.421598	0.10957	3.15166				0.426108	0.65363	0.142634
24.3941	0.294007	0.993524	0.328558	0.136027	0.538247	0.133728	0.38861	0.322892	0.152717	0.231878	0.104139	-0.256153	0.287226	0.593324	0.274056	0.110861	0.225389	0.453781	0.453781	0.115053	3.13637				0.429429	0.650218	0.141889
24.4924	0.292266	1.01235	0.315838	0.144639	0.5294	0.137227	0.399052	0.319579	0.148928	0.239733	0.106996	-0.236298	0.283306	0.589646	0.26066	0.109952	0.227022	0.485492	0.485492	0.121884	3.12062				0.433038	0.646768	0.141136
24.5907	0.291652	1.02634	0.30089	0.153401	0.52434	0.138768	0.41525	0.32069	0.150238	0.247241	0.108961	-0.215637	0.278088	0.582987	0.24611	0.104849	0.227039	0.514173	0.514173	0.128401	3.10649				0.436402	0.643668	0.14046
24.689	0.293726	1.04197	0.286573	0.161938	0.522527	0.141108	0.435061	0.321084	0.15433	0.253607	0.108921	-0.19647	0.270871	0.576184	0.231599	0.0983792	0.235515	0.542167	0.542167	0.138568	3.09209				0.440567	0.640699	0.139812
24.7874	0.294617	1.05317	0.276897	0.168421	0.517535	0.140399	0.453014	0.321034	0.157039	0.257414	0.101999	-0.17873	0.265	0.566231	0.217761	0.0944843	0.247613	0.566565	0.566565	0.151254	3.07545				0.443511	0.637373	0.139086
24.8857	0.293441	1.05858	0.266806	0.175577	0.511864	0.135891	0.467754	0.320272	0.158621	0.262426	0.0949809	-0.164104	0.256938	0.557359	0.202571	0.0930316	0.260585	0.592157	0.592157	0.158036	3.06003				0.445475	0.634614	0.138484
24.984	0.294419	1.06198	0.259353	0.183918	0.508152	0.13047	0.484699	0.320156	0.15831	0.268472	0.0847794	-0.149853	0.24573	0.54914	0.189189	0.0884421	0.273429	0.612762	0.612762	0.169371	3.05298				0.447555	0.633555	0.138253
25.0823	0.296306	1.06278	0.251537	0.193494	0.505199	0.124369	0.503233	0.3224	0.165729	0.275255	0.0748884	-0.13661	0.235667	0.542234	0.177441	0.0799072	0.282589	0.627043	0.627043	0.180834	3.04474				0.449337	0.632087	0.137933
25.1806	0.301615	1.05966	0.24768	0.203328	0.502747	0.115492	0.519584	0.325325	0.174019	0.279724	0.063444	-0.122502	0.226803	0.533686	0.165604	0.072856	0.290383	0.641079	0.641079	0.192197	3.03456				0.450875	0.630107	0.137501
25.2789	0.303198	1.0563	0.248948	0.211721	0.500373	0.10773	0.528899	0.330475	0.183059	0.283211	0.0523711	-0.111199	0.217537	0.522978	0.157952	0.0644784	0.30317	0.653852	0.653852	0.203692	3.02626				0.452326	0.628464	0.137142
25.3772	0.30661	1.04796	0.250735	0.21993	0.502544	0.0998138	0.530614	0.338949	0.190885	0.289406	0.0393533	-0.10099	0.206563	0.510245	0.152442	0.0550503	0.310736	0.665905	0.665905	0.215865	3.01899				0.453215	0.626953	0.136812
25.4755	0.305432	1.03961	0.255281	0.227147	0.507122	0.0897262	0.529449	0.346273	0.199814	0.295947	0.0264786	-0.0897196	0.194631	0.499058	0.148349	0.0487576	0.315282	0.67704	0.67704	0.229216	3.01512				0.454145	0.62611	0.136628
25.5738	0.299784	1.03546	0.263075	0.235275	0.510214	0.0783984	0.530378	0.355962	0.206763	0.301015	0.0122658	-0.0792763	0.183453	0.489761	0.142961	0.0385581	0.325101	0.68304	0.68304	0.23867	3.00898				0.454423	0.625244	0.136439
25.6721	0.294795	1.02593	0.274167	0.242439	0.515416	0.0693822	0.529524	0.36445	0.213732	0.306149	0.000189012	-0.0723929	0.173063	0.479401	0.136842	0.027991	0.340863	0.688455	0.688455	0.251145	3.0019				0.454852	0.623923	0.136151
25.7704	0.288638	1.01048	0.287187	0.246537	0.518498	0.0624295	0.525902	0.373694	0.21855	0.308979	-0.0122798	-0.0642249	0.161149	0.471847	0.129223	0.0203173	0.347384	0.691247	0.691247	0.259956	3.00071				0.454166	0.6236	0.136081
25.8687	0.280719	0.997618	0.302467	0.246843	0.522285	0.0548553	0.515107	0.383597	0.224681	0.310222	-0.0268589	-0.0564727	0.151627	0.459849	0.121158	0.0120147	0.352051	0.689675	0.689675	0.26314	2.99384				0.451814	0.622412	0.135821
25.967	0.27378	0.981963	0.323117	0.240672	0.525331	0.0447921	0.501963	0.395381	0.235767	0.309056	-0.0372449	-0.0533178	0.144735	0.44728	0.115088	0.00341429	0.359941	0.687056	0.687056	0.266239	2.98345				0.44931	0.620423	0.135387
26.0653	0.267743	0.965893	0.343317	0.235658	0.528125	0.034319	0.486677	0.408609	0.243125	0.313064	-0.0468125	-0.051781	0.14373	0.43388	0.11196	-0.00246916	0.3673	0.681547	0.681547	0.271536	2.97093				0.447043	0.617702	0.134794
26.1636	0.25814	0.950365	0.368682	0.227652	0.532295	0.0242136	0.472372	0.418483	0.25007	0.314139	-0.0591865	-0.049086	0.143658	0.421146	0.113016	-0.0116977	0.375291	0.673944	0.673944	0.270281	2.96031				0.444192	0.615673	0.134351
26.2619	0.247466	0.93149	0.395342	0.220637	0.534337	0.0120354	0.45949	0.4285	0.255456	0.311615	-0.0713641	-0.0477302	0.143159	0.411438	0.113125	-0.020952	0.381648	0.660201	0.660201	0.265488	2.95561				0.440342	0.61484	0.134169
26.3602	0.234423	0.910945	0.416418	0.211191	0.538917	-0.00202642	0.444792	0.43597	0.258675	0.312856	-0.0813501	-0.0478755	0.142717	0.405121	0.113028	-0.0302477	0.383521	0.640195	0.640195	0.257401	2.95004				0.434996	0.613932	0.133971
26.4585	0.219209	0.892171	0.436897	0.204982	0.54317	-0.0160408	0.433111	0.442477	0.261835	0.317902	-0.0903414	-0.0489139	0.141969	0.395411	0.113836	-0.0400559	0.388811	0.618709	0.618709	0.249089	2.94613				0.429956	0.61347	0.13387
26.5568	0.200275	0.876225	0.455536	0.199111	0.549022	-0.0277361	0.418738	0.450029	0.263417	0.321479	-0.0977082	-0.0504016	0.137178	0.382969	0.111875	-0.0479435	0.395959	0.597275	0.597275	0.242783	2.94332				0.424699	0.613529	0.133883
26.6551	0.182117	0.861462	0.477278	0.196267	0.555642	-0.0371523	0.401286	0.453054	0.262088	0.325712	-0.104468	-0.0527622	0.134269	0.374809	0.111234	-0.054217	0.403154	0.578417	0.578417	0.236744	2.93511				0.419927	0.612558	0.133671
26.7534	0.162786	0.842268	0.500777	0.195066	0.562423	-0.0482595	0.38168	0.45389	0.260504	0.330372	-0.111827	-0.0552075	0.133738	0.367424	0.111454	-0.0587897	0.403908	0.564356	0.564356	0.228592	2.9283				0.415134	0.611972	0.133543
26.8517	0.144017	0.825378	0.523493	0.195897	0.572027	-0.0596089	0.364955	0.453913	0.263544	0.335987	-0.11455	-0.0551853	0.1297	0.365051	0.109846	-0.0636734	0.401661	0.551208	0.551208	0.217435	2.92231				0.411172	0.611592	0.13346
26.95	0.122219	0.815579	0.549261	0.196732	0.58249	-0.0708643	0.351513	0.455836	0.267296	0.338058	-0.118634	-0.0519456	0.125821	0.358178	0.110547	-0.0701753	0.396134	0.535175	0.535175	0.21189	2.91828				0.407551	0.611901	0.133528
27.0483	0.0976285	0.804559	0.57324	0.198616	0.590311	-0.0802416	0.337811	0.454878	0.271761	0.338637	-0.120694	-0.0471519	0.127724	0.345008	0.110459	-0.0733724	0.387432	0.521816	0.521816	0.206352	2.90816				0.40356	0.610765	0.13328
27.1466	0.0701118	0.793831	0.599637	0.200585	0.596345	-0.0861162	0.323228	0.447653	0.27174	0.340074	-0.123249	-0.0430575	0.129344	0.328554	0.108826	-0.0768271	0.38022	0.512546	0.512546	0.199071	2.89611				0.399104	0.609601	0.133026
27.245	0.0384636	0.785081	0.625399	0.203388	0.603989	-0.0876875	0.308891	0.439796	0.271319	0.339893	-0.125724	-0.0403918	0.126778	0.311741	0.106286	-0.0833244	0.374482	0.503842	0.503842	0.190027	2.88471				0.394324	0.609059	0.132908
27.3433	0.0115722	0.778206	0.648208	0.205854	0.612264	-0.0888282	0.299805	0.428499	0.265709	0.340722	-0.129066	-0.0381218	0.124098	0.296471	0.100599	-0.0867041	0.367448	0.49252	0.49252	0.182028	2.87275				0.38936	0.608381	0.13276
27.4416	-0.0149257	0.77372	0.673566	0.209625	0.613313	-0.0899841	0.297755	0.413633	0.2564	0.338112	-0.131433	-0.036834	0.121075	0.281628	0.0960222	-0.090364	0.363378	0.479495	0.479495	0.176818	2.86007				0.384313	0.607575	0.132584
27.5399	-0.0389388	0.768776	0.69931	0.21153	0.610214	-0.0891902	0.301093	0.39451	0.247531	0.337405	-0.132888	-0.0358031	0.119564	0.266654	0.0903365	-0.0941482	0.363393	0.469649	0.469649	0.169775	2.84864				0.37986	0.606945	0.132446
27.6382	-0.0584367	0.761109	0.72161	0.212844	0.608601	-0.0884881	0.305957	0.372789	0.237875	0.335571	-0.13288	-0.0330726	0.119343	0.250306	0.0859162	-0.0957184	0.359814	0.464548	0.464548	0.163363	2.83996				0.375979	0.606531	0.132356
27.7365	-0.0792195	0.760624	0.744056	0.21637	0.610185	-0.0874123	0.316305	0.354322	0.229629	0.329773	-0.135915	-0.02828	0.116593	0.234009	0.0821101	-0.0965476	0.352552	0.461009	0.461009	0.153878	2.83315				0.372771	0.607008	0.13246
27.8348	-0.0977723	0.763615	0.76611	0.222604	0.618893	-0.0857765	0.327355	0.334011	0.222104	0.326126	-0.137418	-0.0248608	0.116905	0.217503	0.0799651	-0.0986854	0.359225	0.45985	0.45985	0.147883	2.82789				0.371684	0.607893	0.132653
27.9331	-0.111483	0.763544	0.785611	0.233745	0.627284	-0.0833008	0.341852	0.310786	0.210568	0.320769	-0.139375	-0.0209376	0.118349	0.20143	0.0793403	-0.101927	0.369465	0.458107	0.458107	0.147781	2.82765				0.371303	0.609371	0.132976
28.0314	-0.125269	0.767691	0.805903	0.252071	0.639527	-0.0778901	0.358578	0.284163	0.193081	0.313001	-0.144844	-0.0149419	0.11965	0.185755	0.0773454	-0.104721	0.377511	0.458744	0.458744	0.146116	2.83019				0.371448	0.611865	0.13352
28.1297	-0.136553	0.774014	0.82835	0.271613	0.651433	-0.0683556	0.375548	0.253123	0.176734	0.300741	-0.151621	-0.0102757	0.115012	0.168445	0.0736876	-0.107094	0.385362	0.46385	0.46385	0.142929	2.83305				0.371612	0.614915	0.134185
28.228	-0.145384	0.777141	0.847669	0.296368	0.662392	-0.0543723	0.391918	0.221035	0.159544	0.293068	-0.15719	-0.00789929	0.107621	0.150313	0.0679512	-0.108607	0.391643	0.472586	0.472586	0.14495	2.83378				0.372243	0.617361	0.134719
28.3263	-0.147317	0.781473	0.86473	0.320795	0.676943	-0.0346663	0.40696	0.189795	0.142587	0.284239	-0.161195	-0.00577343	0.101989	0.131689	0.0618163	-0.109564	0.402294	0.485505	0.485505	0.146328	2.82736				0.37388	0.618292	0.134922
28.4246	-0.146614	0.784733	0.888707	0.351687	0.689984	-0.0138152	0.424613	0.160909	0.129245	0.271193	-0.168177	-0.00152947	0.0967301	0.112052	0.0571902	-0.112611	0.410988	0.500821	0.500821	0.148407	2.82383				0.376627	0.620194	0.135337
28.5229	-0.144404	0.784375	0.914543	0.382296	0.702007	0.00527108	0.438513	0.128063	0.118179	0.255152	-0.175615	0.00205369	0.0917796	0.0940429	0.0540412	-0.115496	0.420043	0.517818	0.517818	0.14926	2.82123				0.379094	0.62259	0.13586
28.6212	-0.138699	0.780184	0.939114	0.409772	0.712657	0.0265524	0.453309	0.0980875	0.107763	0.240983	-0.181193	0.00550167	0.0853604	0.080565	0.0530192	-0.118032	0.426911	0.53718	0.53718	0.148923	2.81828				0.382067	0.624625	0.136304
28.7195	-0.132949	0.773329	0.961194	0.434633	0.720864	0.0477722	0.4658	0.0698596	0.0995318	0.226984	-0.188159	0.0101137	0.0783795	0.0646334	0.0536903	-0.121335	0.430932	0.552874	0.552874	0.14715	2.82084				0.384239	0.62764	0.136962
28.8178	-0.126566	0.768524	0.983713	0.457227	0.728471	0.0726702	0.475284	0.0425039	0.0912227	0.211129	-0.194183	0.0140009	0.0697069	0.0502149	0.0539853	-0.125734	0.435509	0.562869	0.562869	0.146346	2.82034				0.385719	0.630142	0.137508
28.9161	-0.116154	0.764322	1.00556	0.480466	0.734738	0.102463	0.481446	0.0136381	0.0808551	0.194189	-0.200639	0.0144873	0.0618417	0.0329758	0.0581219	-0.13081	0.43528	0.573537	0.573537	0.147839	2.81971				0.387019	0.632705	0.138068
29.0144	-0.0985178	0.757188	1.02394	0.502974	0.738973	0.134726	0.483956	-0.0150001	0.0708701	0.182241	-0.206054	0.0133054	0.0548778	0.0191753	0.061971	-0.134451	0.434413	0.587562	0.587562	0.14711	2.81784				0.388793	0.63456	0.138472
29.1127	-0.0770672	0.752291	1.04092	0.522133	0.745285	0.166412	0.484283	-0.0405026	0.0613321	0.16823	-0.214049	0.0109582	0.0425396	0.013666	0.0656282	-0.137259	0.436463	0.599801	0.599801	0.148854	2.81571				0.390735	0.636387	0.138871
29.211	-0.0550903	0.746444	1.05496	0.539837	0.750933	0.194948	0.48525	-0.0601386	0.0544373	0.152338	-0.220281	0.00782362	0.0298416	0.00994691	0.0709637	-0.137542	0.438065	0.614601	0.614601	0.154622	2.81344				0.393333	0.637817	0.139183
29.3093	-0.0326776	0.739883	1.06559	0.557765	0.754968	0.220807	0.485342	-0.0801973	0.0493196	0.139788	-0.224465	0.00601378	0.0204225	0.0072317	0.0764725	-0.133528	0.436799	0.631142	0.631142	0.158498	2.81167				0.396285	0.638917	0.139423
29.4076	-0.0139482	0.733409	1.07664	0.578067	0.757686	0.245725	0.485629	-0.0985807	0.0522985	0.124306	-0.22508	0.00558516	0.0131357	0.00247126	0.0830235	-0.129317	0.434177	0.649362	0.649362	0.162704	2.80921				0.399803	0.639842	0.139625
29.5059	0.00436351	0.725827	1.08407	0.595673	0.762833	0.26748	0.485863	-0.11427	0.0580832	0.110389	-0.225478	0.00250446	0.00745689	-0.00350021	0.088245	-0.123374	0.432164	0.666672	0.666672	0.165596	2.80807				0.403111	0.640863	0.139848
29.6042	0.0215352	0.716882	1.09135	0.613717	0.772045	0.289831	0.481386	-0.122757	0.0629021	0.0911684	-0.225887	-0.00402799	0.00114424	-0.0101521	0.0929357	-0.118299	0.424266	0.68075	0.68075	0.169099	2.80403				0.405365	0.641512	0.139989
29.7026	0.0370052	0.708967	1.09915	0.632013	0.781314	0.3133	0.475299	-0.129041	0.0714906	0.0725248	-0.225619	-0.0128895	-0.00391831	-0.015604	0.0972657	-0.113645	0.416683	0.690752	0.690752	0.173541	2.79705				0.407447	0.641503	0.139987
29.8009	0.0549014	0.699581	1.10454	0.649523	0.786506	0.33707	0.465767	-0.136205	0.0783305	0.0581138	-0.220732	-0.0216888	-0.00601817	-0.0179225	0.100174	-0.107472	0.408807	0.699214	0.699214	0.179616	2.78833				0.409507	0.640424	0.139752
29.8992	0.0721897	0.690564	1.10831	0.664037	0.786415	0.35876	0.456774	-0.139748	0.0859492	0.0428763	-0.21508	-0.0304283	-0.0112716	-0.0193445	0.103647	-0.0986418	0.390198	0.705813	0.705813	0.183575	2.77583				0.410297	0.638316	0.139292
29.9975	0.0867296	0.681471	1.11213	0.672437	0.785198	0.380624	0.449131	-0.138867	0.0967691	0.0300773	-0.205801	-0.0406293	-0.0184868	-0.0169943	0.107773	-0.0896331	0.369442	0.714379	0.714379	0.184239	2.76159				0.411236	0.635609	0.138701
30.0958	0.101765	0.670244	1.11162	0.676408	0.782114	0.39954	0.439414	-0.13537	0.112165	0.0175344	-0.194891	-0.0514351	-0.0258044	-0.0122256	0.111628	-0.0792095	0.348922	0.718531	0.718531	0.189366	2.74314				0.411523	0.631221	0.137744
30.1941	0.110286	0.657114	1.11037	0.675437	0.778942	0.414647	0.430455	-0.126189	0.128776	0.00651919	-0.180397	-0.0624776	-0.0313219	-0.00156377	0.116872	-0.0690994	0.323513	0.717898	0.717898	0.194083	2.72512				0.41128	0.626125	0.136632
30.2924	0.118503	0.651007	1.10896	0.668792	0.777835	0.419676	0.421484	-0.114397	0.14616	-0.00965149	-0.164689	-0.0735098	-0.0323974	0.0110014	0.12227	-0.0558891	0.297494	0.714764	0.714764	0.196864	2.71135				0.410971	0.621582	0.13564
30.3907	0.119007	0.646311	1.1067	0.660303	0.776007	0.417237	0.412313	-0.101934	0.16565	-0.0227937	-0.148684	-0.0837145	-0.0335458	0.0233175	0.129115	-0.0416225	0.266385	0.707521	0.707521	0.205009	2.70108				0.410056	0.617421	0.134732
30.489	0.117375	0.642058	1.09803	0.645676	0.77339	0.414034	0.403195	-0.0906574	0.182892	-0.0337584	-0.128679	-0.0967017	-0.0371246	0.0370899	0.136422	-0.023857	0.236752	0.695157	0.695157	0.215317	2.68981				0.40817	0.612437	0.133645
30.5873	0.116373	0.641859	1.09058	0.629904	0.77278	0.410044	0.398213	-0.0763568	0.197158	-0.0437383	-0.108083	-0.108463	-0.0414006	0.0507844	0.141951	-0.00315658	0.203067	0.680936	0.680936	0.226885	2.67563				0.406472	0.607083	0.132476
30.6856	0.111097	0.644674	1.08471	0.618158	0.773596	0.401616	0.392782	-0.0631026	0.209564	-0.0527758	-0.0884166	-0.121669	-0.0425048	0.0637746	0.145265	0.0170963	0.169887	0.660874	0.660874	0.236555	2.66151				0.403979	0.60222	0.131415
30.7839	0.105456	0.647708	1.07818	0.606851	0.777014	0.391077	0.389111	-0.0484199	0.221271	-0.0607688	-0.0677242	-0.136633	-0.0443943	0.0782851	0.145709	0.0359014	0.139575	0.643774	0.643774	0.246766	2.64374				0.401726	0.597133	0.130305
30.8822	0.0988996	0.652277	1.06991	0.597565	0.781517	0.375755	0.386067	-0.0337846	0.230943	-0.065256	-0.0449187	-0.148824	-0.0451315	0.0913241	0.147185	0.0549069	0.111456	0.62982	0.62982	0.25791	2.62726				0.400224	0.592293	0.129249
30.9805	0.0876131	0.656008	1.06206	0.588046	0.78692	0.358011	0.383837	-0.0171583	0.240667	-0.0667009	-0.021484	-0.155935	-0.0458721	0.103389	0.147259	0.0725997	0.0907895	0.611931	0.611931	0.266189	2.61078				0.398613	0.587212	0.12814
31.0788	0.0749735	0.660683	1.05557	0.579542	0.793213	0.338149	0.385607	-0.00109157	0.25116	-0.0695832	0.00257436	-0.159225	-0.0478284	0.114886	0.144693	0.0892751	0.0729347	0.590231	0.590231	0.27532	2.58925				0.396693	0.581439	0.12688
31.1771	0.0619931	0.664083	1.05333	0.572647	0.799396	0.316038	0.388155	0.0145257	0.261113	-0.068179	0.0311565	-0.16104	-0.0461291	0.122303	0.1416	0.103795	0.0536857	0.56577	0.56577	0.2801	2.56983				0.394759	0.576225	0.125743
31.2754	0.0493282	0.670822	1.05326	0.566699	0.807577	0.292957	0.390584	0.0287199	0.271475	-0.0669634	0.0588061	-0.159044	-0.0448603	0.128086	0.135831	0.115341	0.0363499	0.532584	0.532584	0.278136	2.55355				0.391992	0.572016	0.124824
31.3737	0.0411845	0.679848	1.05534	0.559877	0.818653	0.267572	0.396853	0.0440665	0.281095	-0.0669503	0.0859448	-0.156421	-0.0431246	0.132165	0.130288	0.124104	0.022443	0.494546	0.494546	0.281979	2.53899				0.389667	0.568472	0.124051
31.472	0.0339168	0.685383	1.05731	0.549013	0.831968	0.241413	0.399468	0.0627433	0.283184	-0.063922	0.107701	-0.154157	-0.0439598	0.139499	0.12546	0.129608	0.00890124	0.456274	0.456274	0.285246	2.5248				0.386482	0.56541	0.123383
31.5703	0.0286321	0.69199	1.06075	0.538903	0.846958	0.220636	0.399767	0.080928	0.284983	-0.0612419	0.127821	-0.146599	-0.0444014	0.14865	0.120534	0.135024	-0.00253177	0.42142	0.42142	0.286985	2.50978				0.384305	0.562408	0.122727
31.6686	0.0250071	0.701394	1.06103	0.531278	0.859598	0.199078	0.399932	0.0965335	0.284275	-0.0546582	0.148492	-0.13327	-0.0450127	0.15618	0.113695	0.142288	-0.0101751	0.384605	0.384605	0.289979	2.49803				0.382518	0.559722	0.122141
31.7669	0.0185739	0.712999	1.06124	0.521797	0.871635	0.178377	0.398372	0.115619	0.279396	-0.047384	0.16685	-0.116901	-0.0480525	0.161441	0.106957	0.151926	-0.0177242	0.345765	0.345765	0.288761	2.48804				0.380164	0.557787	0.121719
31.8652	0.0104246	0.722347	1.06275	0.510811	0.885263	0.157862	0.398678	0.135888	0.274917	-0.0405628	0.182798	-0.0998866	-0.0512517	0.164522	0.10218	0.159466	-0.0243784	0.306681	0.306681	0.288457	2.47863				0.377728	0.556509	0.12144
31.9635	-0.0019455	0.729016	1.06356	0.502613	0.898993	0.139604	0.398647	0.158456	0.271115	-0.0337073	0.197767	-0.0820844	-0.0522228	0.169048	0.0956715	0.164052	-0.0258553	0.268148	0.268148	0.289896	2.46863				0.375597	0.555274	0.121171
32.0618	-0.0149166	0.739855	1.06569	0.498586	0.915653	0.122194	0.396273	0.180033	0.26809	-0.026103	0.210732	-0.063373	-0.0542359	0.169873	0.0872767	0.169619	-0.0259485	0.228087	0.228087	0.292647	2.45896				0.37367	0.554997	0.12111
32.1602	-0.0275922	0.751262	1.06943	0.496761	0.930266	0.108109	0.394609	0.200779	0.262898	-0.0138323	0.224649	-0.0411705	-0.057733	0.169962	0.0793185	0.171632	-0.023234	0.190535	0.190535	0.292213	2.44894				0.372302	0.554773	0.121061
32.2585	-0.0364459	0.764491	1.06982	0.498728	0.94329	0.096379	0.391761	0.219432	0.257869	-0.00328509	0.23449	-0.0145809	-0.060036	0.167903	0.0700081	0.173164	-0.0148383	0.153876	0.153876	0.289168	2.43911				0.371152	0.554452	0.120991
32.3568	-0.0424064	0.774372	1.07043	0.501927	0.95368	0.0914558	0.388795	0.236996	0.254158	0.0107678	0.241913	0.0135889	-0.0646552	0.164234	0.0602242	0.171026	-0.00642483	0.118949	0.118949	0.287588	2.42408				0.369983	0.553104	0.120697
32.4551	-0.0457952	0.784029	1.07645	0.506125	0.962862	0.088932	0.387981	0.253325	0.249534	0.0242138	0.247704	0.0413214	-0.0687931	0.165352	0.0498525	0.166827	0.00477913	0.0880988	0.0880988	0.282904	2.41232				0.369815	0.552595	0.120586
32.5534	-0.0485392	0.796593	1.08431	0.511364	0.973479	0.0873257	0.382936	0.273088	0.243343	0.0383614	0.252052	0.0707172	-0.066633	0.165931	0.038393	0.159232	0.0209175	0.0656381	0.0656381	0.275276	2.40155				0.370998	0.552073	0.120472
32.6517	-0.0520328	0.806635	1.0895	0.516079	0.981227	0.0886941	0.375889	0.294665	0.239358	0.0533559	0.255053	0.1015	-0.0631704	0.165865	0.025491	0.146656	0.0422955	0.0429995	0.0429995	0.267931	2.39639				0.372256	0.552248	0.12051
32.75	-0.0558456	0.816303	1.09277	0.5194	0.987274	0.0940411	0.36963	0.316254	0.240246	0.0655349	0.256906	0.133073	-0.0600166	0.164564	0.0154101	0.133253	0.0631975	0.0242799	0.0242799	0.264052	2.38892				0.373978	0.551741	0.1204
32.8483	-0.0621758	0.830087	1.09738	0.525264	0.990132	0.100446	0.363656	0.335409	0.238948	0.0747138	0.260329	0.16469	-0.0538564	0.160583	0.00757261	0.123123	0.0800394	0.00277947	0.00277947	0.2593	2.38112				0.375349	0.551815	0.120416
32.9466	-0.0698073	0.838683	1.09949	0.532062	0.989038	0.109716	0.360135	0.356844	0.240858	0.0841276	0.260471	0.193011	-0.0479088	0.159973	-4.20361e-05	0.112276	0.096169	-0.0208552	-0.0208552	0.253235	2.37398				0.376219	0.551873	0.120429
33.0449	-0.0765074	0.846996	1.10005	0.536955	0.98659	0.118006	0.358961	0.377926	0.243867	0.0947966	0.257571	0.217475	-0.0422898	0.164903	-0.00766256	0.104284	0.109008	-0.0412977	-0.0412977	0.248309	2.36631				0.377284	0.551615	0.120372
33.1432	-0.0869863	0.854993	1.10045	0.540171	0.982345	0.129886	0.354723	0.399185	0.245975	0.105461	0.25525	0.236564	-0.0357497	0.168591	-0.0113733	0.0955993	0.120232	-0.0568803	-0.0568803	0.241419	2.3626				0.37836	0.551833	0.12042
33.2415	-0.102043	0.863271	1.09531	0.543034	0.976644	0.144095	0.352593	0.41921	0.248515	0.114004	0.249464	0.251681	-0.029961	0.172598	-0.0117235	0.0867256	0.130754	-0.0682306	-0.0682306	0.238272	2.35628				0.379155	0.551183	0.120278
33.3398	-0.117445	0.869145	1.08803	0.546452	0.972112	0.160217	0.346405	0.437306	0.246965	0.127137	0.242861	0.262263	-0.0233482	0.178488	-0.00806903	0.0800111	0.13901	-0.0714887	-0.0714887	0.241354	2.34562				0.380549	0.548846	0.119768
33.4381	-0.138788	0.873098	1.07911	0.549666	0.963045	0.181068	0.33712	0.455505	0.24283	0.138067	0.235056	0.26951	-0.0168905	0.186485	-0.00320469	0.0735529	0.146352	-0.0695866	-0.0695866	0.239458	2.33242				0.381156	0.545705	0.119083
33.5364	-0.156445	0.879978	1.0693	0.556123	0.950766	0.204065	0.329441	0.467808	0.242804	0.146378	0.229629	0.276968	-0.00946078	0.192954	0.00261981	0.0684705	0.154297	-0.068228	-0.068228	0.237006	2.31728				0.382073	0.542035	0.118282
33.6347	-0.177712	0.885121	1.05783	0.564147	0.93575	0.224773	0.322575	0.477758	0.243845	0.156673	0.225501	0.281654	-0.00343797	0.200441	0.0111655	0.0616075	0.155375	-0.0674785	-0.0674785	0.237139	2.29915				0.382114	0.538002	0.117402
33.733	-0.200365	0.887393	1.04586	0.570616	0.92341	0.243274	0.32018	0.486704	0.249279	0.167399	0.220406	0.284674	0.00404987	0.211951	0.0240745	0.0525673	0.152429	-0.0630373	-0.0630373	0.235447	2.27762				0.382423	0.533154	0.116344
33.8313	-0.218695	0.888559	1.03418	0.57882	0.910009	0.260986	0.321558	0.489184	0.255474	0.177774	0.217262	0.286228	0.0112437	0.227928	0.0365652	0.041404	0.149832	-0.056222	-0.056222	0.236123	2.25845				0.383354	0.528291	0.115283
33.9296	-0.236623	0.887883	1.0211	0.586772	0.89425	0.277426	0.321362	0.489651	0.260461	0.186549	0.212696	0.284998	0.017312	0.244677	0.0468822	0.0322388	0.147648	-0.0489551	-0.0489551	0.236956	2.23544				0.383322	0.52271	0.114065
34.0279	-0.249231	0.887822	1.00797	0.589995	0.879455	0.292227	0.320836	0.484467	0.266256	0.19447	0.206869	0.283764	0.0241576	0.260341	0.0572317	0.0260695	0.142123	-0.0395992	-0.0395992	0.23697	2.21413				0.383177	0.517033	0.112826
34.1262	-0.260835	0.882316	0.99164	0.591373	0.860116	0.300778	0.320956	0.476568	0.269414	0.200766	0.199529	0.283481	0.0363429	0.279191	0.0701566	0.0194777	0.130953	-0.0278938	-0.0278938	0.235519	2.18937				0.381968	0.509961	0.111283
34.2245	-0.274344	0.874746	0.97496	0.592631	0.844742	0.308266	0.318598	0.467111	0.271927	0.202573	0.189718	0.280371	0.0519276	0.295921	0.0840599	0.0153538	0.114614	-0.018599	-0.018599	0.23666	2.16766				0.380014	0.503967	0.109975
34.3228	-0.28798	0.863524	0.959808	0.594719	0.830546	0.313789	0.315682	0.455928	0.275312	0.206839	0.181865	0.272037	0.0685886	0.312659	0.0986125	0.0106975	0.0952649	-0.00669174	-0.00669174	0.239945	2.14263				0.377956	0.497375	0.108536
34.4211	-0.306436	0.851003	0.945112	0.598919	0.817056	0.318569	0.310463	0.443655	0.278976	0.210918	0.176776	0.264082	0.0872216	0.33036	0.114283	0.00581212	0.0762276	0.00427035	0.00427035	0.244146	2.12231				0.376095	0.492067	0.107378
34.5194	-0.32244	0.836971	0.924289	0.601527	0.804141	0.327184	0.30489	0.429148	0.280471	0.215247	0.17212	0.255237	0.104127	0.34208	0.128232	-8.14869e-05	0.0578831	0.0109394	0.0109394	0.251915	2.09586				0.372889	0.48576	0.106001
34.6178	-0.337788	0.817391	0.902158	0.602519	0.790327	0.334329	0.304252	0.411119	0.283193	0.217857	0.167695	0.245601	0.114212	0.354484	0.143938	-0.00194051	0.0332529	0.0139831	0.0139831	0.260808	2.06645				0.368468	0.479149	0.104559
34.7161	-0.353101	0.797491	0.878355	0.601625	0.778718	0.338972	0.301733	0.388899	0.286141	0.220826	0.165757	0.231865	0.121294	0.365838	0.163111	-6.0326e-05	0.00390121	0.0183939	0.0183939	0.265902	2.0344				0.36326	0.47227	0.103058
34.8144	-0.361503	0.776733	0.85511	0.596691	0.769242	0.340257	0.299548	0.363195	0.284463	0.228811	0.164233	0.217872	0.127725	0.37619	0.182185	0.00183535	-0.0239775	0.0231884	0.0231884	0.268599	2.00008				0.357794	0.464703	0.101406
34.9127	-0.367207	0.754264	0.829282	0.588008	0.761419	0.342297	0.29389	0.339634	0.284876	0.239817	0.159245	0.205664	0.130242	0.388656	0.199362	0.00253381	-0.047107	0.0331184	0.0331184	0.273551	1.96713				0.352943	0.456845	0.0996918
35.011	-0.366789	0.735446	0.806014	0.574855	0.756818	0.343683	0.286924	0.314034	0.28372	0.247736	0.155277	0.193626	0.133923	0.398308	0.215638	0.00572776	-0.0718277	0.0444599	0.0444599	0.276339	1.93346				0.348183	0.448907	0.0979595
35.1093	-0.364051	0.713399	0.781905	0.563739	0.754154	0.345418	0.278661	0.289408	0.278267	0.253325	0.153912	0.183	0.140483	0.399988	0.230872	0.00802171	-0.0956382	0.0566193	0.0566193	0.280572	1.89772				0.343162	0.44049	0.0961227
35.2076	-0.35845	0.687087	0.754262	0.550684	0.753576	0.343082	0.269268	0.261825	0.275101	0.257835	0.151606	0.175381	0.14988	0.402269	0.24452	0.0112989	-0.119862	0.0655585	0.0655585	0.286755	1.86419				0.337687	0.432335	0.0943432
35.3059	-0.348095	0.663427	0.730421	0.537357	0.751436	0.337682	0.255939	0.235651	0.272983	0.26181	0.150395	0.169729	0.159483	0.406862	0.255023	0.0152823	-0.144904	0.071223	0.071223	0.283268	1.8357				0.331995	0.425418	0.0928338
35.4042	-0.336506	0.641562	0.70711	0.52048	0.747391	0.331132	0.244348	0.210015	0.275959	0.261171	0.150882	0.167589	0.167731	0.412218	0.262552	0.0195137	-0.167648	0.0734603	0.0734603	0.277276	1.80864				0.326111	0.418843	0.091399
35.5025	-0.321089	0.617272	0.685497	0.502248	0.745225	0.322569	0.232879	0.181204	0.283827	0.264643	0.152583	0.169552	0.174399	0.416265	0.267511	0.025835	-0.191727	0.0757891	0.0757891	0.276412	1.78399				0.320984	0.412595	0.0900355
35.6008	-0.307675	0.592946	0.665852	0.482228	0.742444	0.311543	0.222088	0.156998	0.289953	0.269524	0.156826	0.171952	0.182696	0.419696	0.269875	0.0332681	-0.218689	0.0797627	0.0797627	0.275518	1.76101				0.316075	0.406987	0.0888118
35.6991	-0.289458	0.570719	0.648369	0.462453	0.741136	0.29974	0.21109	0.133647	0.295093	0.269392	0.161667	0.174974	0.191697	0.423584	0.26871	0.0404149	-0.237929	0.0804129	0.0804129	0.273512	1.7391				0.311368	0.40146	0.0876058
35.7974	-0.270888	0.552276	0.635407	0.441222	0.734793	0.290739	0.199565	0.10988	0.298523	0.267404	0.16644	0.176	0.196925	0.426033	0.264419	0.0484154	-0.250498	0.0791938	0.0791938	0.272495	1.71448				0.306286	0.395447	0.0862936
35.8957	-0.25424	0.531221	0.625185	0.419058	0.727392	0.28251	0.187352	0.088541	0.301775	0.26525	0.169398	0.17804	0.203319	0.424836	0.26046	0.0562093	-0.265397	0.0788936	0.0788936	0.272441	1.68621				0.300826	0.389125	0.084914
35.994	-0.235569	0.515033	0.616983	0.39705	0.722976	0.274604	0.17666	0.0671864	0.306295	0.262365	0.173269	0.183522	0.210065	0.42312	0.257714	0.0618465	-0.279875	0.0796217	0.0796217	0.270268	1.66305				0.296467	0.384008	0.0837974
36.0923	-0.217628	0.499849	0.611023	0.378066	0.717948	0.266271	0.166862	0.0458005	0.308781	0.260519	0.177664	0.187567	0.21628	0.416885	0.256626	0.0649072	-0.287656	0.0767042	0.0767042	0.268093	1.63876				0.291906	0.378777	0.082656
36.1906	-0.197806	0.485903	0.609975	0.361335	0.715899	0.264718	0.156805	0.0244304	0.312781	0.257817	0.184946	0.189995	0.216228	0.408244	0.255008	0.0655314	-0.288595	0.0722721	0.0722721	0.266966	1.61948				0.288296	0.374503	0.0817233
36.2889	-0.174547	0.47613	0.61081	0.343272	0.711435	0.261455	0.152303	0.00471422	0.317545	0.255111	0.193262	0.19045	0.211815	0.400773	0.252414	0.0643923	-0.285264	0.0699337	0.0699337	0.263037	1.60084				0.285229	0.369894	0.0807174
36.3872	-0.150882	0.47345	0.612359	0.323651	0.707085	0.261129	0.149952	-0.0133977	0.319666	0.251164	0.201457	0.191099	0.202941	0.389178	0.250383	0.0640232	-0.278611	0.0661351	0.0661351	0.260203	1.58484				0.282474	0.365765	0.0798164
36.4855	-0.124558	0.471223	0.612203	0.300565	0.703758	0.261509	0.151643	-0.030665	0.320463	0.245433	0.2089	0.187244	0.192684	0.374077	0.248347	0.0657814	-0.268015	0.0635582	0.0635582	0.252305	1.56492				0.279283	0.360526	0.0786732
36.5838	-0.10061	0.469665	0.614852	0.279792	0.699598	0.256822	0.150908	-0.0444767	0.323021	0.239932	0.217435	0.182885	0.185166	0.360657	0.248717	0.069773	-0.258589	0.0660678	0.0660678	0.240085	1.5468				0.276884	0.355686	0.0776171
36.6821	-0.0768005	0.471734	0.617501	0.260799	0.694739	0.251142	0.147829	-0.0580298	0.327357	0.235744	0.222711	0.177379	0.181638	0.346474	0.24581	0.0702558	-0.243533	0.0666481	0.0666481	0.228547	1.53233				0.274616	0.351574	0.0767198
36.7804	-0.0525101	0.476334	0.621689	0.246398	0.68879	0.248185	0.149364	-0.0699544	0.329621	0.230481	0.227279	0.170986	0.180304	0.336296	0.241749	0.0701144	-0.220745	0.0655128	0.0655128	0.219402	1.51554				0.27335	0.346747	0.0756663
36.8787	-0.032873	0.481593	0.628111	0.236951	0.679818	0.24866	0.150788	-0.0777257	0.333306	0.218472	0.234122	0.16389	0.178089	0.327098	0.237199	0.0708467	-0.201933	0.0620756	0.0620756	0.211188	1.50086				0.272029	0.34286	0.0748181
36.977	-0.0113317	0.483583	0.638172	0.228827	0.672124	0.246227	0.158437	-0.086279	0.335892	0.202865	0.245894	0.15504	0.180114	0.318832	0.233696	0.0699882	-0.179474	0.0536394	0.0536394	0.204099	1.4854				0.270923	0.339135	0.0740054
37.0754	0.00777852	0.485166	0.647288	0.225372	0.663719	0.244786	0.166953	-0.094267	0.33749	0.188929	0.260542	0.147697	0.183721	0.309282	0.229613	0.0675083	-0.15374	0.0454759	0.0454759	0.199829	1.46779				0.270305	0.334959	0.0730941
37.1737	0.0264049	0.491483	0.656949	0.22013	0.654284	0.243196	0.173864	-0.105714	0.344567	0.172811	0.272713	0.138307	0.184796	0.304714	0.226464	0.0636922	-0.126875	0.0351882	0.0351882	0.193899	1.4516				0.269412	0.33198	0.0724439
37.272	0.0475258	0.502623	0.671767	0.218553	0.643944	0.242752	0.182746	-0.115342	0.348497	0.157493	0.283278	0.12842	0.182856	0.300805	0.223444	0.0610941	-0.0924492	0.0276484	0.0276484	0.188681	1.42888				0.269565	0.327778	0.0715269
37.3703	0.0699523	0.507968	0.682402	0.218373	0.63677	0.246532	0.194643	-0.127238	0.350293	0.14245	0.292571	0.120416	0.178633	0.292997	0.220257	0.0586698	-0.0547871	0.0241957	0.0241957	0.194414	1.39985				0.270169	0.322058	0.0702787
37.4686	0.0927714	0.509043	0.691848	0.22115	0.627555	0.2498	0.208956	-0.136016	0.34866	0.129425	0.300221	0.109689	0.176149	0.285123	0.218162	0.0532775	-0.0153943	0.0205681	0.0205681	0.198333	1.3692				0.270433	0.315943	0.0689445
37.5669	0.115061	0.51526	0.700762	0.225322	0.616982	0.253002	0.222377	-0.141088	0.340923	0.114544	0.304594	0.096077	0.173597	0.279513	0.217976	0.0472314	0.025859	0.0146213	0.0146213	0.199759	1.3331				0.270004	0.309467	0.0675312
37.6652	0.137262	0.51869	0.705136	0.2291	0.606218	0.257913	0.235905	-0.148931	0.334551	0.0990938	0.307595	0.0814741	0.166782	0.275803	0.220452	0.0393383	0.0724264	0.00991128	0.00991128	0.201534	1.29662				0.269371	0.303155	0.0661539
37.7635	0.156707	0.520753	0.708357	0.230994	0.592773	0.263422	0.251156	-0.155279	0.328643	0.0879038	0.310982	0.0667721	0.157434	0.269476	0.22522	0.0330517	0.1173	0.0108419	0.0108419	0.202584	1.26029				0.269058	0.296653	0.0647351
37.8618	0.177561	0.521239	0.710458	0.234485	0.581047	0.267817	0.259841	-0.160285	0.319822	0.0779739	0.313682	0.0543423	0.153017	0.263823	0.230997	0.0286015	0.159384	0.0148094	0.0148094	0.203533	1.22915				0.269339	0.290901	0.0634798
37.9601	0.199751	0.522052	0.708654	0.239966	0.572861	0.269925	0.264124	-0.165409	0.312241	0.0684255	0.318339	0.0410704	0.150561	0.258071	0.235959	0.0239055	0.207303	0.0188965	0.0188965	0.202913	1.20009				0.269933	0.285859	0.0623795
38.0584	0.221372	0.51935	0.704002	0.245424	0.563912	0.270526	0.268178	-0.169662	0.303169	0.0594243	0.324246	0.0270702	0.147752	0.251596	0.243215	0.019282	0.255531	0.0227117	0.0227117	0.206343	1.16829				0.270211	0.280555	0.0612221
38.1567	0.242444	0.516246	0.695863	0.251619	0.555209	0.271807	0.271791	-0.170993	0.295652	0.0495977	0.330344	0.0145735	0.143676	0.249775	0.250736	0.0129523	0.296101	0.0295916	0.0295916	0.211026	1.13659				0.270676	0.275212	0.0600563
38.255	0.262134	0.514898	0.685992	0.254584	0.54717	0.270855	0.275691	-0.169156	0.287846	0.0412332	0.334222	0.00111019	0.142639	0.249155	0.255188	0.0115032	0.335534	0.0371584	0.0371584	0.213179	1.10411				0.271057	0.269698	0.058853
38.3533	0.280434	0.511819	0.671301	0.25986	0.53942	0.269663	0.276661	-0.168228	0.280114	0.0359339	0.339845	-0.0104865	0.145552	0.24949	0.260181	0.0120037	0.375369	0.0440486	0.0440486	0.216457	1.06803				0.271501	0.263519	0.0575046
38.4516	0.3017	0.503527	0.656894	0.266224	0.532541	0.263397	0.275774	-0.168145	0.270838	0.0315832	0.344643	-0.0211559	0.152314	0.25282	0.264084	0.0113424	0.411844	0.0515222	0.0515222	0.219089	1.03117				0.271597	0.25746	0.0561823
38.5499	0.324179	0.493855	0.643822	0.276003	0.525485	0.254746	0.274248	-0.165626	0.261259	0.0289973	0.348535	-0.0289628	0.159009	0.261143	0.265071	0.0114173	0.443101	0.0574719	0.0574719	0.228173	0.995494				0.272138	0.251605	0.0549047
38.6482	0.34607	0.484264	0.62649	0.286605	0.518114	0.249662	0.274421	-0.16428	0.250344	0.02452	0.35125	-0.0331927	0.161902	0.26769	0.263264	0.0118412	0.476762	0.0588536	0.0588536	0.237051	0.962221				0.272034	0.246817	0.0538599
38.7465	0.369335	0.477335	0.61045	0.301067	0.511307	0.248254	0.274758	-0.163143	0.236605	0.0179037	0.356386	-0.0355554	0.16299	0.272198	0.263772	0.0132966	0.506232	0.0643277	0.0643277	0.246396	0.927127				0.272637	0.242171	0.0528461
38.8448	0.394134	0.467666	0.595728	0.314065	0.502585	0.245003	0.271656	-0.160638	0.222773	0.0120684	0.359617	-0.032942	0.164904	0.275158	0.262578	0.0117531	0.528227	0.0728523	0.0728523	0.258303	0.896229				0.273075	0.237606	0.05185
38.9431	0.420603	0.455169	0.577042	0.326822	0.494997	0.237983	0.269498	-0.159608	0.207672	0.0088665	0.359338	-0.0273757	0.167189	0.280978	0.260496	0.00856886	0.554479	0.0814958	0.0814958	0.268301	0.871524				0.273597	0.234202	0.051107
39.0414	0.444156	0.443462	0.556019	0.340104	0.487915	0.232124	0.266422	-0.159134	0.194962	0.00865781	0.356781	-0.0213222	0.16339	0.286908	0.257434	0.00829155	0.575283	0.0939188	0.0939188	0.274893	0.847654				0.273897	0.230471	0.050293
39.1397	0.467993	0.433957	0.536418	0.349928	0.481225	0.226964	0.261095	-0.158136	0.185402	0.00589948	0.350311	-0.0165053	0.154458	0.294777	0.255228	0.0088314	0.59379	0.107271	0.107271	0.281984	0.825104				0.273965	0.2275	0.0496447
39.238	0.489953	0.425865	0.517995	0.36156	0.474603	0.223348	0.258043	-0.154344	0.172196	0.00755563	0.346741	-0.00960704	0.147535	0.300418	0.252635	0.00950879	0.612622	0.120981	0.120981	0.291098	0.807522				0.275105	0.225096	0.0491199
39.3363	0.506821	0.417029	0.496891	0.37449	0.467649	0.22153	0.25645	-0.147395	0.157383	0.0101233	0.345885	-0.00394481	0.142798	0.307366	0.248749	0.00746151	0.622659	0.129818	0.129818	0.301079	0.793705				0.275541	0.22277	0.0486123
39.4346	0.518217	0.412753	0.47981	0.385096	0.457485	0.217953	0.255473	-0.134635	0.144179	0.0129264	0.345734	-0.000661203	0.138716	0.317458	0.246254	0.00500189	0.628763	0.137018	0.137018	0.305222	0.785823				0.275981	0.220701	0.0481609
39.533	0.528811	0.413285	0.465447	0.397232	0.449653	0.21638	0.254082	-0.122435	0.13171	0.0174804	0.345756	0.00278092	0.134217	0.326135	0.243026	0.00579607	0.632143	0.145499	0.145499	0.314879	0.782683				0.277622	0.219225	0.0478388
39.6313	0.537538	0.40901	0.449694	0.410414	0.441426	0.216454	0.252022	-0.111034	0.124371	0.0212892	0.352109	0.00518044	0.132245	0.334722	0.238083	0.00360439	0.633448	0.152123	0.152123	0.324177	0.782085				0.279099	0.218116	0.0475969
39.7296	0.543819	0.409074	0.439826	0.425739	0.436939	0.215599	0.249948	-0.0997572	0.116533	0.0279165	0.358063	0.00762622	0.134094	0.34264	0.23229	0.00144854	0.630669	0.156166	0.156166	0.331953	0.783818				0.280979	0.217422	0.0474454
39.8279	0.550876	0.412088	0.430819	0.441294	0.435942	0.214055	0.243655	-0.0881822	0.107652	0.0338749	0.362968	0.00996145	0.13929	0.353662	0.226977	-0.0015659	0.623659	0.154992	0.154992	0.339792	0.787629				0.282592	0.217454	0.0474523
39.9262	0.555026	0.413685	0.419825	0.457442	0.43695	0.213714	0.24589	-0.0765576	0.105766	0.0389878	0.369752	0.00930949	0.142941	0.364008	0.221779	-0.00846272	0.615751	0.149542	0.149542	0.347244	0.794896				0.284144	0.218233	0.0476223
40.0245	0.555615	0.419135	0.41094	0.473056	0.436994	0.213807	0.25378	-0.0633204	0.102629	0.0419735	0.375485	0.00757477	0.144508	0.376635	0.215996	-0.015786	0.600889	0.145239	0.145239	0.354155	0.805184				0.285701	0.219087	0.0478087
40.1228	0.555228	0.427063	0.405297	0.491171	0.437039	0.215907	0.259637	-0.0493588	0.104564	0.0447231	0.38046	0.00319262	0.145795	0.388185	0.205472	-0.0221613	0.58065	0.138756	0.138756	0.35503	0.819269				0.286889	0.220442	0.0481043
40.2211	0.555685	0.434249	0.401789	0.507428	0.437488	0.219666	0.266817	-0.0324974	0.1049	0.0472794	0.384564	-0.00295298	0.148401	0.396739	0.19328	-0.025154	0.563433	0.131651	0.131651	0.354269	0.832383				0.288146	0.221856	0.0484129
40.3194	0.554227	0.439709	0.398064	0.52559	0.435297	0.223302	0.273989	-0.0150599	0.106112	0.0520635	0.390693	-0.00681566	0.15117	0.404139	0.184072	-0.0321156	0.542574	0.126393	0.126393	0.358618	0.847004				0.289782	0.223236	0.0487142
40.4177	0.550513	0.448274	0.398859	0.539579	0.431773	0.228097	0.280601	0.00519439	0.10783	0.0554661	0.394489	-0.0117231	0.15297	0.410848	0.174283	-0.0390444	0.516288	0.12062	0.12062	0.361423	0.868728				0.291223	0.2253	0.0491645
40.516	0.54286	0.458584	0.397814	0.551719	0.427917	0.235208	0.289847	0.0274805	0.112612	0.0582826	0.399262	-0.0170296	0.154049	0.419436	0.165627	-0.0420519	0.497035	0.113204	0.113204	0.364829	0.892745				0.293459	0.227803	0.0497106
40.6143	0.53455	0.471094	0.396461	0.564175	0.423062	0.24462	0.298181	0.0506067	0.118891	0.0600358	0.404297	-0.0216966	0.154308	0.427692	0.160882	-0.0479498	0.482031	0.106168	0.106168	0.36381	0.920606				0.296095	0.231319	0.0504779
40.7126	0.527377	0.48387	0.400627	0.575135	0.418929	0.251907	0.30805	0.0744516	0.129619	0.0633788	0.408815	-0.0308374	0.158073	0.442506	0.160502	-0.0546676	0.463849	0.099291	0.099291	0.359247	0.946925				0.299349	0.235045	0.051291
40.8109	0.518353	0.491649	0.404598	0.58138	0.417312	0.257611	0.320243	0.0998968	0.143416	0.0688548	0.416399	-0.039603	0.163679	0.459963	0.161584	-0.0601364	0.446782	0.0882849	0.0882849	0.354024	0.975205				0.302751	0.23907	0.0521693
40.9092	0.504198	0.499185	0.405611	0.585579	0.418699	0.263258	0.333657	0.12316	0.162125	0.0721916	0.424245	-0.0508032	0.169368	0.477245	0.165119	-0.0602308	0.430657	0.0750643	0.0750643	0.345611	1.00217				0.30577	0.243042	0.0530362
41.0075	0.488728	0.511368	0.410416	0.588801	0.418234	0.271702	0.34062	0.146564	0.186642	0.077226	0.436535	-0.065055	0.176585	0.491064	0.169602	-0.0584706	0.410127	0.0645887	0.0645887	0.338254	1.02196				0.309051	0.246057	0.053694
41.1058	0.474388	0.528475	0.417603	0.591371	0.410874	0.282187	0.344215	0.170325	0.210474	0.0828862	0.446543	-0.077608	0.187403	0.503111	0.17633	-0.0598961	0.387999	0.0527618	0.0527618	0.332516	1.03895				0.312079	0.249258	0.0543925
41.2041	0.455835	0.541622	0.425479	0.59821	0.401525	0.292302	0.352028	0.192861	0.232585	0.0927183	0.456978	-0.0885293	0.201051	0.517081	0.18263	-0.0618485	0.366228	0.0370437	0.0370437	0.324946	1.05955				0.315111	0.253739	0.0553704
41.3024	0.437647	0.546762	0.434646	0.604132	0.391351	0.301608	0.358953	0.215862	0.256621	0.0992806	0.465126	-0.101307	0.211934	0.534845	0.188656	-0.0642506	0.338665	0.0221577	0.0221577	0.314165	1.07767				0.316985	0.258441	0.0563965
41.4007	0.420502	0.551599	0.443828	0.60483	0.382769	0.306458	0.36374	0.234966	0.284148	0.100028	0.472525	-0.11195	0.219482	0.549397	0.19646	-0.0639366	0.313463	0.0102089	0.0102089	0.301825	1.09832				0.318518	0.263352	0.057468
41.499	0.406542	0.552727	0.452434	0.608689	0.378914	0.311001	0.36624	0.246984	0.31179	0.101819	0.482223	-0.121853	0.228863	0.562804	0.20488	-0.0637113	0.29179	-0.00163535	-0.00163535	0.291616	1.11452				0.320238	0.268175	0.0585206
41.5973	0.393485	0.550214	0.459845	0.610114	0.375367	0.314544	0.367467	0.257876	0.342802	0.100939	0.492741	-0.129237	0.237222	0.576852	0.215528	-0.0651463	0.267248	-0.0135307	-0.0135307	0.275969	1.12851				0.321204	0.272941	0.0595606
41.6956	0.380648	0.551805	0.471693	0.610765	0.375108	0.314111	0.371638	0.26582	0.371554	0.0997915	0.496207	-0.133344	0.243196	0.589401	0.227295	-0.0641847	0.245375	-0.0216258	-0.0216258	0.259789	1.14463				0.322764	0.277617	0.0605809
41.7939	0.369648	0.548493	0.481937	0.609319	0.373345	0.312009	0.374381	0.274663	0.398699	0.0970422	0.49776	-0.137929	0.248242	0.60086	0.236142	-0.060677	0.227051	-0.0287015	-0.0287015	0.248631	1.15879				0.323857	0.281651	0.0614613
41.8922	0.356912	0.540663	0.489933	0.607453	0.371595	0.310204	0.380544	0.283297	0.425046	0.0953244	0.498416	-0.143087	0.252933	0.607491	0.242161	-0.0561658	0.21045	-0.0332656	-0.0332656	0.239773	1.17572				0.324863	0.285493	0.0622997
41.9906	0.346456	0.534053	0.49931	0.603915	0.370591	0.305512	0.379711	0.291179	0.446095	0.0945702	0.495951	-0.143368	0.255675	0.611211	0.248997	-0.0476919	0.192556	-0.0360894	-0.0360894	0.232092	1.18742				0.325336	0.287634	0.0627669
42.0889	0.342097	0.523589	0.508613	0.598145	0.367867	0.302184	0.374049	0.29703	0.467304	0.0994523	0.492518	-0.141194	0.257506	0.614325	0.257107	-0.0375179	0.174451	-0.0391581	-0.0391581	0.230562	1.19296				0.325844	0.288225	0.0628959
42.1872	0.337228	0.508561	0.517164	0.590187	0.364282	0.299237	0.368969	0.301085	0.482557	0.109666	0.485591	-0.137572	0.261023	0.621177	0.269682	-0.0271805	0.159754	-0.0381189	-0.0381189	0.232042	1.19923				0.326974	0.28781	0.0628053
42.2855	0.32928	0.492837	0.527666	0.583474	0.360831	0.29199	0.361525	0.299681	0.49906	0.123094	0.481056	-0.131429	0.26534	0.630788	0.282998	-0.0180422	0.146412	-0.0386426	-0.0386426	0.234418	1.20883				0.328216	0.28836	0.0629254
42.3838	0.325373	0.476653	0.535119	0.575407	0.35875	0.286337	0.354494	0.295225	0.512633	0.131386	0.474346	-0.126322	0.271106	0.64129	0.295611	-0.00749504	0.135396	-0.0432604	-0.0432604	0.234373	1.21411				0.328442	0.288919	0.0630473
42.4821	0.323273	0.451607	0.542178	0.57285	0.357788	0.281481	0.345432	0.29068	0.525967	0.138612	0.467091	-0.11833	0.275687	0.651781	0.307769	0.00233731	0.128472	-0.0473967	-0.0473967	0.237433	1.21322				0.328597	0.288427	0.0629399
42.5804	0.320604	0.422763	0.552424	0.570354	0.355406	0.27866	0.330269	0.286287	0.540228	0.14649	0.458482	-0.107398	0.278838	0.659822	0.31728	0.00984789	0.110752	-0.0502571	-0.0502571	0.23865	1.20978				0.327573	0.287881	0.0628207
42.6787	0.315999	0.393825	0.563715	0.564782	0.353814	0.274626	0.314727	0.275267	0.552507	0.156373	0.449162	-0.0969969	0.282945	0.665659	0.323971	0.020922	0.0866613	-0.0510992	-0.0510992	0.242605	1.20505				0.325877	0.287036	0.0626363
42.777	0.311697	0.363849	0.573414	0.559592	0.353335	0.270805	0.297885	0.263914	0.557667	0.16807	0.441033	-0.0834277	0.286361	0.665443	0.326828	0.0326649	0.0670452	-0.0496468	-0.0496468	0.252901	1.20147				0.324346	0.285289	0.0622552
42.8753	0.308494	0.33337	0.581937	0.553888	0.348049	0.266127	0.278659	0.252706	0.560169	0.179406	0.428821	-0.0721187	0.289288	0.664714	0.327449	0.0441706	0.0447811	-0.0441077	-0.0441077	0.26307	1.19734				0.322005	0.283371	0.0618367
42.9736	0.309687	0.30557	0.594301	0.550156	0.343173	0.262184	0.259214	0.24405	0.555086	0.192905	0.418189	-0.0594612	0.292058	0.660392	0.324807	0.0522433	0.0227369	-0.03778	-0.03778	0.275067	1.19297				0.319989	0.281472	0.0614223
43.0719	0.309737	0.273478	0.606042	0.54521	0.3428	0.25743	0.247514	0.236202	0.543893	0.204919	0.403235	-0.0448358	0.294181	0.657004	0.321046	0.0606891	0.00858987	-0.0339314	-0.0339314	0.287873	1.19246				0.318076	0.279971	0.0610947
43.1702	0.307811	0.236404	0.617291	0.541324	0.349668	0.25096	0.235318	0.228763	0.530226	0.218049	0.390279	-0.0328101	0.296558	0.653291	0.315737	0.0724441	-0.0054012	-0.0322422	-0.0322422	0.29946	1.199				0.316185	0.280253	0.0611563
43.2685	0.308846	0.198714	0.625076	0.534112	0.359832	0.239648	0.219579	0.223094	0.512969	0.230196	0.378396	-0.0207806	0.296743	0.645154	0.30976	0.0844302	-0.0150865	-0.0247002	-0.0247002	0.312535	1.20381				0.314172	0.279315	0.0609514
43.3668	0.311139	0.166405	0.629675	0.527393	0.36884	0.226565	0.203699	0.217803	0.494116	0.243301	0.367698	-0.00693418	0.297143	0.633064	0.305231	0.0992879	-0.0206757	-0.0155585	-0.0155585	0.326773	1.20753				0.312711	0.277608	0.0605791
43.4651	0.314929	0.132323	0.637397	0.525323	0.377648	0.216998	0.189588	0.213294	0.477199	0.264408	0.355258	0.00573536	0.298296	0.624315	0.299548	0.112933	-0.0235595	-0.00722259	-0.00722259	0.339802	1.21002				0.312238	0.276723	0.060386
43.5634	0.317628	0.0980556	0.644142	0.52054	0.382716	0.207263	0.177441	0.211815	0.457973	0.284092	0.339092	0.0182294	0.299649	0.61376	0.292338	0.126623	-0.0263885	0.00261378	0.00261378	0.353538	1.21346				0.311295	0.275949	0.0602171
43.6617	0.317981	0.0658801	0.650134	0.514966	0.387697	0.196653	0.166043	0.207419	0.432894	0.302052	0.322015	0.0288193	0.303091	0.602582	0.283753	0.140771	-0.0224328	0.0126462	0.0126462	0.368519	1.21979				0.310187	0.275623	0.060146
43.76	0.321703	0.0306168	0.651822	0.507578	0.3919	0.189279	0.15316	0.208865	0.408459	0.322239	0.310047	0.0367702	0.307949	0.589818	0.275434	0.154687	-0.018723	0.022853	0.022853	0.38231	1.22424				0.309231	0.275362	0.0600889
43.8583	0.32467	-0.00165587	0.654352	0.50277	0.393682	0.185321	0.140574	0.213322	0.386608	0.342169	0.299051	0.0458168	0.313179	0.575556	0.270701	0.16648	-0.0181536	0.0356423	0.0356423	0.390384	1.22936				0.308832	0.275427	0.0601031
43.9566	0.328298	-0.0308023	0.658392	0.500656	0.393648	0.181316	0.126378	0.216886	0.365154	0.360257	0.290122	0.0548817	0.317095	0.564524	0.267342	0.179439	-0.0140676	0.0486347	0.0486347	0.396239	1.23129				0.308777	0.275397	0.0600967
44.0549	0.330603	-0.0629429	0.660994	0.498526	0.390791	0.17969	0.114669	0.218962	0.342412	0.379842	0.285799	0.0578866	0.323217	0.559137	0.264771	0.191003	-0.00416071	0.0638608	0.0638608	0.40308	1.23208				0.309242	0.275635	0.0601485
44.1532	0.327455	-0.0941394	0.66351	0.498334	0.387846	0.177098	0.104022	0.222608	0.321773	0.394212	0.283453	0.0589886	0.329779	0.55208	0.263269	0.201642	0.0146249	0.0796745	0.0796745	0.401322	1.23608				0.309681	0.276114	0.0602531
44.2515	0.323604	-0.121392	0.664029	0.499329	0.384042	0.171295	0.0930891	0.228507	0.302823	0.402296	0.286529	0.0616458	0.333412	0.542325	0.258234	0.211605	0.0371084	0.0914374	0.0914374	0.399396	1.23879				0.309502	0.276388	0.0603129
44.3498	0.322688	-0.147215	0.660273	0.498796	0.380662	0.170201	0.0814497	0.237702	0.281828	0.407512	0.288254	0.063906	0.33448	0.532265	0.252504	0.222774	0.0593798	0.10421	0.10421	0.397284	1.24				0.309198	0.276182	0.0602679
44.4482	0.316549	-0.168134	0.663611	0.500164	0.376705	0.166264	0.0670575	0.248806	0.261841	0.415781	0.292326	0.0663963	0.331557	0.521276	0.246858	0.235071	0.0853299	0.121559	0.121559	0.394168	1.24434				0.309956	0.276645	0.0603688
44.5465	0.311301	-0.183836	0.666912	0.49587	0.374337	0.160313	0.0536997	0.257172	0.240574	0.422973	0.300211	0.0675338	0.329792	0.509049	0.243832	0.247775	0.113203	0.140591	0.140591	0.390173	1.25168				0.311131	0.277304	0.0605127
44.6448	0.307495	-0.195727	0.667832	0.491338	0.375463	0.153242	0.0464463	0.262629	0.217198	0.42833	0.30824	0.0672104	0.330885	0.497945	0.24583	0.258488	0.146609	0.15873	0.15873	0.389797	1.26235				0.313288	0.278338	0.0607384
44.7431	0.301991	-0.206111	0.667675	0.489923	0.377398	0.145232	0.0391985	0.270486	0.194291	0.429751	0.316272	0.0693793	0.334237	0.485113	0.249115	0.267346	0.187227	0.17766	0.17766	0.388374	1.27138				0.315886	0.279075	0.0608991
44.8414	0.293604	-0.215867	0.669298	0.486762	0.377731	0.137453	0.0313185	0.277573	0.177141	0.430018	0.324558	0.0722813	0.338336	0.473539	0.255306	0.276825	0.22462	0.19957	0.19957	0.386642	1.27861				0.318804	0.279861	0.0610707
44.9397	0.281018	-0.221057	0.673884	0.485932	0.380041	0.131261	0.0257845	0.285502	0.162171	0.429764	0.331924	0.0780321	0.338835	0.460964	0.26179	0.28523	0.266662	0.218031	0.218031	0.386862	1.28153				0.322009	0.280056	0.0611131
45.038	0.265231	-0.226784	0.675062	0.481878	0.378363	0.124331	0.0187139	0.293139	0.152565	0.428738	0.340137	0.0825951	0.337678	0.453813	0.271516	0.294215	0.312447	0.235279	0.235279	0.385196	1.2812				0.32479	0.280084	0.0611193
45.1363	0.250412	-0.22925	0.67406	0.479225	0.37449	0.116685	0.0104419	0.300901	0.142573	0.429218	0.350561	0.0867988	0.333627	0.449075	0.282225	0.301553	0.349552	0.255159	0.255159	0.382933	1.28104				0.327449	0.280368	0.0611814
45.2346	0.238361	-0.229835	0.668469	0.474655	0.367527	0.108632	0.00293106	0.30739	0.132981	0.42368	0.360982	0.0915112	0.32756	0.444571	0.293762	0.307933	0.390076	0.275786	0.275786	0.383913	1.27825				0.329758	0.280062	0.0611146
45.3329	0.22498	-0.224796	0.667478	0.47198	0.356383	0.105376	-0.00388804	0.312567	0.128941	0.416417	0.370372	0.0961176	0.326268	0.441871	0.306632	0.315302	0.426757	0.290381	0.290381	0.386073	1.27256				0.332293	0.279224	0.0609316
45.4312	0.2086	-0.218357	0.670391	0.469633	0.348196	0.103863	-0.0111574	0.316808	0.124163	0.409874	0.378605	0.100034	0.327519	0.442383	0.316623	0.320413	0.462626	0.303619	0.303619	0.392026	1.2687				0.335151	0.279384	0.0609666
45.5295	0.191959	-0.208405	0.668935	0.464412	0.337677	0.100891	-0.0226041	0.321292	0.114258	0.39979	0.390422	0.102695	0.329841	0.440552	0.326929	0.32611	0.496068	0.316828	0.316828	0.400059	1.26327				0.337039	0.279507	0.0609933
45.6278	0.175483	-0.192503	0.66941	0.46105	0.328613	0.0967245	-0.0369399	0.327223	0.106789	0.39248	0.403794	0.107139	0.329146	0.441442	0.338249	0.333307	0.527415	0.326724	0.326724	0.406798	1.25867				0.339416	0.279891	0.0610773
45.7261	0.159248	-0.177668	0.671744	0.458988	0.318381	0.0935944	-0.0503157	0.337393	0.105467	0.38754	0.419239	0.11049	0.32728	0.44229	0.348418	0.342268	0.552116	0.335726	0.335726	0.414273	1.25314				0.342159	0.280271	0.0611602
45.8244	0.141163	-0.161581	0.677317	0.46118	0.307106	0.0912651	-0.0623102	0.339584	0.102782	0.379867	0.43215	0.114789	0.324149	0.443042	0.358888	0.351562	0.574528	0.339643	0.339643	0.424308	1.25145				0.344311	0.281601	0.0614504
45.9227	0.123112	-0.145038	0.679662	0.46296	0.300267	0.0888452	-0.0729001	0.338386	0.0981402	0.371279	0.445879	0.11948	0.317796	0.44677	0.366936	0.362679	0.596031	0.338356	0.338356	0.437672	1.24823				0.345852	0.282812	0.0617147
46.021	0.106387	-0.130067	0.681838	0.462649	0.294906	0.0880592	-0.0839846	0.338786	0.0956445	0.362327	0.456756	0.125046	0.310568	0.448603	0.373766	0.373751	0.613496	0.338769	0.338769	0.449745	1.24312				0.347092	0.283609	0.0618885
46.1193	0.0888405	-0.111018	0.68623	0.462425	0.292897	0.0875402	-0.0974422	0.342023	0.097992	0.349964	0.463888	0.135232	0.297828	0.445086	0.377114	0.381515	0.623979	0.336655	0.336655	0.458022	1.23981				0.347392	0.28399	0.0619716
46.2176	0.0725532	-0.0925627	0.690025	0.458344	0.294125	0.0878622	-0.10859	0.346354	0.0990192	0.337417	0.469297	0.147287	0.285131	0.443801	0.379268	0.38977	0.627866	0.33117	0.33117	0.472192	1.23644				0.347521	0.284084	0.0619921
46.3159	0.0583163	-0.0733088	0.698142	0.453356	0.296913	0.0904138	-0.115796	0.348425	0.0995903	0.324414	0.47304	0.157414	0.274416	0.443975	0.383657	0.399223	0.62896	0.327552	0.327552	0.486915	1.2315				0.348318	0.283815	0.0619336
46.4142	0.0421911	-0.0526492	0.710526	0.450349	0.298624	0.091308	-0.119126	0.346067	0.100731	0.310325	0.477512	0.166594	0.26422	0.442719	0.38945	0.406898	0.625566	0.32357	0.32357	0.500838	1.227				0.348871	0.283693	0.0619069
46.5125	0.0307555	-0.0391367	0.715746	0.445052	0.301243	0.0944454	-0.11547	0.34339	0.104485	0.296394	0.480299	0.176213	0.255159	0.444845	0.395889	0.413103	0.617808	0.315388	0.315388	0.517463	1.22071				0.349008	0.28244	0.0616335
46.6108	0.019081	-0.0252926	0.720279	0.441834	0.301499	0.101044	-0.106511	0.339572	0.11014	0.284656	0.479368	0.184499	0.242615	0.447559	0.399207	0.418483	0.606702	0.306932	0.306932	0.531321	1.21564				0.348836	0.280697	0.061253
46.7091	0.00898225	-0.0127218	0.72667	0.439525	0.298953	0.106007	-0.0987099	0.336095	0.117669	0.275287	0.479298	0.189208	0.226745	0.447586	0.399156	0.4259	0.594968	0.299759	0.299759	0.539613	1.20598				0.347892	0.278607	0.0607971
46.8074	0.00600277	-0.00133952	0.735283	0.434928	0.295633	0.11243	-0.0898296	0.334151	0.126011	0.268567	0.478985	0.188634	0.208615	0.449035	0.401017	0.430955	0.581592	0.287409	0.287409	0.546382	1.19113				0.346333	0.2757	0.0601626
46.9058	0.00571865	0.011464	0.740684	0.43278	0.291255	0.118276	-0.080384	0.332373	0.130045	0.259317	0.476568	0.184759	0.187165	0.450932	0.400853	0.436044	0.569965	0.269405	0.269405	0.55138	1.17474				0.343464	0.272829	0.0595362
47.0041	0.012116	0.0224576	0.744526	0.430157	0.285638	0.122039	-0.0734436	0.327654	0.1303	0.250105	0.475387	0.176046	0.16925	0.453505	0.401071	0.441577	0.55889	0.251082	0.251082	0.551187	1.16227				0.340138	0.270755	0.0590835
47.1024	0.022852	0.0334548	0.752425	0.431362	0.285029	0.125147	-0.062947	0.321174	0.130069	0.239855	0.469827	0.167055	0.153956	0.452629	0.39963	0.446539	0.545417	0.234097	0.234097	0.551327	1.15212				0.337386	0.26874	0.0586439
47.2007	0.0348012	0.0441545	0.761978	0.431876	0.283485	0.130578	-0.0554108	0.312702	0.134451	0.229855	0.463264	0.157377	0.140271	0.445742	0.397561	0.453083	0.537175	0.214873	0.214873	0.553273	1.13845				0.334496	0.266725	0.0582041
47.299	0.047109	0.0541547	0.777889	0.434761	0.282517	0.138921	-0.0460634	0.30671	0.140998	0.225905	0.454466	0.148354	0.12872	0.438938	0.395531	0.45845	0.529217	0.197398	0.197398	0.551744	1.12082				0.332568	0.264208	0.057655
47.3973	0.0606508	0.0595716	0.789853	0.433464	0.285496	0.144988	-0.03659	0.300079	0.142754	0.222985	0.445926	0.135361	0.11348	0.432038	0.393498	0.463412	0.521576	0.181576	0.181576	0.547084	1.10516				0.329711	0.262321	0.0572431
47.4956	0.079203	0.0624376	0.799491	0.428431	0.287631	0.149951	-0.0240549	0.292025	0.148882	0.218192	0.438337	0.123083	0.0966318	0.421215	0.394595	0.46831	0.51596	0.163765	0.163765	0.539316	1.08417				0.326254	0.259458	0.0566183
47.5939	0.0974427	0.0603158	0.813982	0.424503	0.293531	0.155251	-0.00607113	0.285749	0.159359	0.213426	0.427357	0.113104	0.0787508	0.411028	0.394352	0.471364	0.509804	0.148975	0.148975	0.531092	1.06425				0.323645	0.256941	0.056069
47.6922	0.117683	0.0508259	0.827131	0.419243	0.301225	0.162831	0.0136378	0.277867	0.169323	0.204591	0.416325	0.100505	0.0622589	0.396689	0.391136	0.471767	0.505118	0.135405	0.135405	0.522631	1.04546				0.320336	0.254929	0.05563
47.7905	0.141834	0.040983	0.840005	0.417284	0.309531	0.16778	0.0325646	0.269114	0.173483	0.196724	0.403445	0.0905104	0.0437372	0.382605	0.388638	0.468563	0.503897	0.121241	0.121241	0.515186	1.02194				0.316681	0.253047	0.0552193
47.8888	0.165269	0.0317083	0.849753	0.411129	0.319752	0.168664	0.0477951	0.267792	0.179315	0.190643	0.390631	0.0808895	0.0254592	0.369241	0.386627	0.465305	0.505671	0.111217	0.111217	0.507749	0.994553				0.313351	0.250726	0.054713
47.9871	0.192468	0.0208839	0.859971	0.402745	0.327085	0.166227	0.063624	0.266746	0.184869	0.185201	0.378066	0.0683756	0.0104037	0.354341	0.385838	0.458538	0.512207	0.102955	0.102955	0.49983	0.969085				0.310115	0.249079	0.0543534
48.0854	0.219906	0.0107702	0.871241	0.395259	0.332387	0.16104	0.0824301	0.262145	0.184887	0.180718	0.367233	0.0554023	-0.00360459	0.342834	0.388995	0.446267	0.524117	0.0898982	0.0898982	0.497733	0.945889				0.306926	0.249143	0.0543675
48.1837	0.25068	0.00115929	0.880151	0.386581	0.333016	0.155746	0.106841	0.25852	0.181054	0.17945	0.357771	0.0397121	-0.00911102	0.333347	0.39503	0.438208	0.540557	0.0774282	0.0774282	0.496394	0.924856				0.304991	0.249451	0.0544346
48.282	0.286123	-0.00688554	0.887653	0.382756	0.330536	0.149353	0.13136	0.252204	0.173967	0.181084	0.349585	0.0209535	-0.0127303	0.323258	0.399725	0.428093	0.557051	0.0660215	0.0660215	0.494605	0.903369				0.303052	0.250071	0.05457
48.3803	0.322444	-0.0164544	0.892413	0.377762	0.32597	0.143624	0.150399	0.246355	0.167173	0.185462	0.34046	0.00358356	-0.0140552	0.31238	0.402194	0.414946	0.571355	0.0543459	0.0543459	0.494149	0.883279				0.300578	0.250994	0.0547715
48.4786	0.360434	-0.0305525	0.895369	0.37338	0.319623	0.137006	0.165545	0.245468	0.162797	0.189483	0.329658	-0.0148527	-0.0156893	0.302089	0.401879	0.403366	0.590721	0.041211	0.041211	0.492422	0.860592				0.297674	0.252811	0.055168
48.5769	0.398506	-0.0384333	0.903596	0.372467	0.31403	0.128023	0.174851	0.242752	0.154938	0.190571	0.319618	-0.0348352	-0.0158086	0.289658	0.400383	0.390368	0.609395	0.0282245	0.0282245	0.486954	0.83615				0.294268	0.255539	0.0557631
48.6752	0.435551	-0.0442987	0.909708	0.37494	0.309354	0.116904	0.179555	0.243637	0.144963	0.191591	0.311812	-0.0520959	-0.0117846	0.281864	0.399826	0.377512	0.629818	0.0117868	0.0117868	0.485048	0.807476				0.291188	0.258571	0.0564249
48.7735	0.471197	-0.048579	0.912486	0.378299	0.301886	0.109081	0.185783	0.24823	0.132445	0.189865	0.304064	-0.0635748	-0.00663697	0.27813	0.397896	0.365055	0.650911	-0.00406857	-0.00406857	0.487586	0.782351				0.288968	0.261711	0.0571099
48.8718	0.500918	-0.0539814	0.913796	0.382335	0.291276	0.101754	0.191204	0.255623	0.118923	0.188135	0.298156	-0.0702822	-0.00445771	0.273977	0.392305	0.35609	0.669156	-0.0167404	-0.0167404	0.491918	0.762664				0.286954	0.264941	0.057815
48.9701	0.529522	-0.0630761	0.915852	0.38613	0.282686	0.097155	0.197299	0.264808	0.109204	0.187595	0.294563	-0.0753408	0.000310119	0.269301	0.385603	0.344887	0.683567	-0.0272894	-0.0272894	0.494848	0.748252				0.285647	0.268187	0.0585231
49.0684	0.555605	-0.0752791	0.916443	0.390757	0.278172	0.0932368	0.203668	0.272793	0.104274	0.18854	0.29477	-0.0741167	0.00739602	0.264573	0.376944	0.333193	0.690508	-0.0344661	-0.0344661	0.504651	0.729464				0.285079	0.269934	0.0589044
49.1667	0.581065	-0.0906385	0.913557	0.393239	0.272653	0.0914779	0.206137	0.281963	0.0983717	0.192402	0.299639	-0.0701865	0.0111684	0.260459	0.367538	0.322697	0.696287	-0.0438957	-0.0438957	0.518858	0.711899				0.284324	0.272153	0.0593886
49.265	0.603275	-0.10585	0.910131	0.394487	0.267604	0.0871147	0.209881	0.293716	0.0886474	0.194336	0.303094	-0.0641558	0.0168393	0.263567	0.356599	0.312287	0.701688	-0.0548814	-0.0548814	0.528981	0.69736				0.283326	0.274595	0.0599215
49.3634	0.620919	-0.11907	0.902139	0.392559	0.264705	0.0811694	0.211717	0.302157	0.0774939	0.194266	0.308264	-0.056317	0.0251143	0.268171	0.344655	0.301725	0.702425	-0.0661902	-0.0661902	0.540868	0.686177				0.28175	0.276307	0.0602952
49.4617	0.638756	-0.128257	0.895549	0.395503	0.260394	0.0780572	0.213805	0.31046	0.071859	0.193998	0.312904	-0.0422815	0.0335686	0.274497	0.332025	0.28856	0.703	-0.0755086	-0.0755086	0.554787	0.676986				0.281579	0.277579	0.0605728
49.56	0.653745	-0.136907	0.890092	0.402437	0.254046	0.0754825	0.211375	0.320092	0.0619062	0.195872	0.318615	-0.0279138	0.0436185	0.283747	0.318184	0.27679	0.699479	-0.0839144	-0.0839144	0.566371	0.669014				0.281344	0.278769	0.0608323
49.6583	0.669143	-0.140385	0.88161	0.410441	0.246838	0.0751741	0.206733	0.327304	0.0483279	0.196311	0.326959	-0.0140099	0.0552866	0.293494	0.305478	0.267327	0.696767	-0.0949023	-0.0949023	0.578072	0.661166				0.281059	0.280092	0.0611211
49.7566	0.68287	-0.138411	0.872965	0.421555	0.237604	0.0757204	0.201122	0.332958	0.0339367	0.197227	0.336213	0.0012602	0.06782	0.310538	0.296109	0.261351	0.691099	-0.104749	-0.104749	0.591416	0.650329				0.281628	0.280774	0.06127
49.8549	0.691436	-0.13269	0.862464	0.42871	0.228241	0.0790292	0.191975	0.335901	0.0211368	0.192973	0.345997	0.0141544	0.0822955	0.328359	0.286616	0.257864	0.6824	-0.108804	-0.108804	0.604913	0.644047				0.282296	0.280199	0.0611444
49.9532	0.700296	-0.128388	0.853484	0.43685	0.218356	0.0844273	0.185739	0.334246	0.00699213	0.187386	0.357786	0.0281239	0.0974646	0.348256	0.273268	0.254827	0.669803	-0.11605	-0.11605	0.61889	0.641314				0.282715	0.280556	0.0612224
50.0515	0.704785	-0.122595	0.849217	0.446416	0.210278	0.0919218	0.176581	0.33289	-0.00376572	0.181205	0.369518	0.0463001	0.113927	0.365864	0.261689	0.255927	0.651609	-0.121352	-0.121352	0.633008	0.634728				0.283657	0.280065	0.0611151
50.1498	0.705653	-0.115376	0.844369	0.454177	0.20364	0.101788	0.165087	0.33319	-0.00591298	0.174924	0.380969	0.0657853	0.131204	0.380123	0.245908	0.262783	0.629552	-0.119324	-0.119324	0.640771	0.628766				0.285179	0.2773	0.0605119
50.2481	0.703349	-0.112484	0.839514	0.467292	0.199162	0.111656	0.151352	0.329953	-0.00735285	0.166192	0.392316	0.0873065	0.143397	0.397178	0.228626	0.269214	0.603905	-0.117395	-0.117395	0.650939	0.619246				0.285999	0.275026	0.0600156
50.3464	0.695208	-0.110051	0.83731	0.479553	0.195283	0.123752	0.13433	0.327935	-0.00488352	0.155275	0.404422	0.112848	0.152646	0.413504	0.214034	0.278963	0.577889	-0.113776	-0.113776	0.658066	0.609074				0.287029	0.272347	0.059431
50.4447	0.68496	-0.106438	0.833637	0.494397	0.194912	0.1349	0.118663	0.326415	-0.00045627	0.144576	0.416745	0.138369	0.159126	0.42975	0.201908	0.292949	0.558679	-0.109188	-0.109188	0.662224	0.594587				0.288644	0.269517	0.0588135
50.543	0.674535	-0.096988	0.828767	0.507326	0.197349	0.145825	0.10641	0.320153	0.00420019	0.137955	0.429885	0.165782	0.168577	0.446972	0.191775	0.306885	0.535809	-0.101479	-0.101479	0.669043	0.584784				0.291528	0.265983	0.0580422
50.6413	0.660232	-0.0908704	0.820211	0.518434	0.198459	0.159239	0.0955794	0.316231	0.0109069	0.133249	0.44399	0.195919	0.176121	0.463551	0.180845	0.322699	0.515164	-0.0925133	-0.0925133	0.678903	0.580497				0.294968	0.262674	0.0573202
50.7396	0.646075	-0.0886225	0.814652	0.526085	0.200805	0.169891	0.084923	0.309989	0.018826	0.126867	0.457474	0.223002	0.179664	0.474595	0.170124	0.338046	0.494847	-0.080444	-0.080444	0.685766	0.577328				0.297593	0.259669	0.0566644
50.8379	0.630141	-0.0864331	0.813934	0.533746	0.207263	0.177114	0.0698394	0.30227	0.0278712	0.122683	0.472145	0.246197	0.183004	0.485021	0.16147	0.351941	0.473477	-0.0691279	-0.0691279	0.690711	0.573253				0.299876	0.257417	0.0561729
50.9362	0.61624	-0.0838545	0.810697	0.542423	0.217768	0.183871	0.0545701	0.290884	0.0369093	0.118538	0.487072	0.267353	0.191261	0.500033	0.154816	0.363721	0.454962	-0.0601124	-0.0601124	0.69437	0.571375				0.302513	0.255892	0.0558402
51.0345	0.603029	-0.0764354	0.807337	0.54787	0.227968	0.188538	0.0371033	0.276816	0.0450207	0.115536	0.5011	0.288441	0.198138	0.516589	0.152053	0.375572	0.438845	-0.05351	-0.05351	0.701596	0.56572				0.304944	0.254924	0.0556291
51.1328	0.585349	-0.0618067	0.805438	0.549836	0.235431	0.194342	0.0202888	0.266722	0.0502977	0.110806	0.510254	0.305431	0.19856	0.534425	0.153095	0.387711	0.427171	-0.0493792	-0.0493792	0.70261	0.567262				0.306879	0.25398	0.0554231
51.2311	0.564361	-0.044042	0.803995	0.553888	0.237629	0.198429	0.00493885	0.254169	0.0560698	0.103704	0.516352	0.318669	0.20056	0.554124	0.155574	0.397804	0.418962	-0.0437369	-0.0437369	0.696846	0.569463				0.308287	0.252539	0.0551084
51.3294	0.548274	-0.0288372	0.80322	0.559113	0.238634	0.206357	-0.00936247	0.236849	0.0648133	0.0967146	0.524105	0.327588	0.199748	0.569542	0.160792	0.40547	0.410625	-0.0328701	-0.0328701	0.697235	0.568514				0.310174	0.251165	0.0548088
51.4277	0.536577	-0.0140859	0.804148	0.568788	0.235414	0.214221	-0.0197584	0.221654	0.0766558	0.0870054	0.533638	0.331026	0.194015	0.585172	0.166311	0.413264	0.408639	-0.0203927	-0.0203927	0.695019	0.567444				0.312589	0.250366	0.0546343
51.526	0.522134	-0.000867492	0.80631	0.575766	0.233114	0.219397	-0.031936	0.20804	0.0832023	0.0772046	0.545893	0.329625	0.189787	0.601031	0.1717	0.422215	0.406406	-0.0103862	-0.0103862	0.691054	0.56372				0.313953	0.250371	0.0546354
51.6243	0.50652	0.0120587	0.805783	0.58246	0.234641	0.224891	-0.0418447	0.193081	0.0920546	0.0661929	0.556518	0.326583	0.183174	0.616225	0.175853	0.429306	0.407852	0.0019979	0.0019979	0.694756	0.566226				0.316016	0.250725	0.0547127
51.7226	0.48785	0.0232074	0.803884	0.589027	0.234025	0.228739	-0.0501905	0.180136	0.102801	0.0566643	0.563698	0.323653	0.175085	0.630696	0.1802	0.434492	0.41167	0.0139341	0.0139341	0.697725	0.568858				0.317623	0.250851	0.0547402
51.821	0.467084	0.0346287	0.801983	0.590736	0.233195	0.22957	-0.0538577	0.16843	0.113835	0.049818	0.570995	0.321607	0.165413	0.639907	0.185269	0.436075	0.416619	0.0247579	0.0247579	0.697611	0.574965				0.318733	0.250213	0.0546009
51.9193	0.44886	0.0422542	0.802252	0.592258	0.229836	0.230046	-0.054326	0.156869	0.127945	0.0506658	0.576764	0.325035	0.154949	0.648076	0.191243	0.435922	0.424846	0.0283645	0.0283645	0.698854	0.579555				0.319935	0.2503	0.05462
52.0176	0.430821	0.0517707	0.802883	0.594206	0.223766	0.231781	-0.0539309	0.14624	0.142982	0.0529874	0.579888	0.326856	0.144695	0.654345	0.201878	0.434155	0.434197	0.0379128	0.0379128	0.697963	0.580454				0.321608	0.249017	0.05434
52.1159	0.411516	0.0617386	0.79734	0.592695	0.213756	0.235244	-0.0516719	0.135079	0.15539	0.0560527	0.585282	0.326385	0.131602	0.665436	0.212117	0.427056	0.443706	0.0471391	0.0471391	0.694774	0.589309				0.322718	0.24787	0.0540897
52.2142	0.396137	0.0674975	0.791109	0.593361	0.202916	0.237964	-0.0498734	0.126449	0.164267	0.0578794	0.591778	0.323107	0.120016	0.677475	0.224723	0.416499	0.453273	0.0476925	0.0476925	0.695108	0.593568				0.322792	0.248364	0.0541976
52.3125	0.380844	0.0746737	0.787811	0.589126	0.193012	0.239323	-0.048618	0.118294	0.174086	0.0591171	0.59804	0.316852	0.109785	0.687758	0.236993	0.403473	0.46683	0.0475581	0.0475581	0.694215	0.597133				0.322565	0.248905	0.0543156
52.4108	0.364008	0.083508	0.781923	0.583901	0.183741	0.237725	-0.0415224	0.109967	0.183688	0.0653194	0.601438	0.306504	0.102914	0.699379	0.247838	0.387137	0.481387	0.0457305	0.0457305	0.695069	0.599703				0.322147	0.248801	0.0542928
52.5091	0.34499	0.0915631	0.779034	0.57622	0.173243	0.236556	-0.0328283	0.104136	0.191815	0.0707265	0.606556	0.294653	0.0943407	0.709668	0.258437	0.367828	0.491952	0.0408529	0.0408529	0.697255	0.603784				0.32103	0.249492	0.0544435
52.6074	0.320817	0.0960677	0.781002	0.571458	0.16177	0.237711	-0.0268506	0.102572	0.197055	0.0717244	0.612153	0.282136	0.0801005	0.718117	0.270178	0.345388	0.502146	0.0365618	0.0365618	0.697163	0.604638				0.318975	0.251198	0.0548159
52.7057	0.29684	0.103152	0.78428	0.566339	0.148657	0.239371	-0.0216391	0.100233	0.203332	0.0732499	0.614355	0.266515	0.0669694	0.726469	0.281646	0.32374	0.512944	0.0339006	0.0339006	0.693798	0.601084				0.316626	0.252495	0.055099
52.804	0.270599	0.113145	0.787698	0.559727	0.131571	0.245652	-0.0141771	0.0986074	0.210213	0.0785973	0.614346	0.253439	0.0588802	0.738332	0.293816	0.303229	0.522587	0.0284208	0.0284208	0.692229	0.595199				0.314787	0.253876	0.0554002
52.9023	0.244986	0.120811	0.787414	0.550651	0.112873	0.25319	-0.00307672	0.0938322	0.218087	0.0847056	0.610446	0.243257	0.0544712	0.746892	0.305796	0.281536	0.534598	0.0227609	0.0227609	0.689975	0.588239				0.312581	0.254552	0.0555477
53.0006	0.219775	0.12884	0.788693	0.538517	0.0924454	0.259052	0.00837158	0.0892274	0.225429	0.0918298	0.603972	0.232113	0.0473875	0.751498	0.316851	0.260945	0.543464	0.0197941	0.0197941	0.688352	0.577221				0.309694	0.254769	0.0555951
53.0989	0.193351	0.134751	0.791022	0.530376	0.0724539	0.264378	0.0220211	0.083778	0.233094	0.0997282	0.596929	0.222543	0.039588	0.752974	0.324833	0.241526	0.549821	0.0219054	0.0219054	0.685276	0.566897				0.307102	0.254615	0.0555616
53.1972	0.171684	0.135112	0.795281	0.525157	0.0535376	0.270057	0.0366414	0.075543	0.244203	0.108307	0.590977	0.217378	0.03683	0.753459	0.329409	0.222721	0.559606	0.0231634	0.0231634	0.684491	0.555055				0.305323	0.255144	0.055677
53.2955	0.148512	0.134516	0.80229	0.5172	0.0387797	0.276968	0.0514238	0.070076	0.254669	0.117776	0.585267	0.213288	0.0336324	0.752596	0.333532	0.205537	0.562808	0.023354	0.023354	0.686443	0.539539				0.303408	0.255588	0.0557739
53.3938	0.119818	0.137375	0.807876	0.510371	0.0258428	0.279678	0.0637604	0.0697809	0.265531	0.126974	0.580931	0.213856	0.0351549	0.754036	0.33803	0.189572	0.562236	0.0195565	0.0195565	0.681545	0.527818				0.301395	0.256013	0.0558666
53.4921	0.0892193	0.140026	0.814904	0.499265	0.0172234	0.282478	0.0706824	0.0683834	0.27456	0.138175	0.573513	0.221778	0.0396037	0.753574	0.342303	0.17408	0.5561	0.01272	0.01272	0.678376	0.515923				0.298838	0.256414	0.0559541
53.5904	0.0616164	0.139976	0.822231	0.488588	0.00679031	0.287014	0.0781347	0.0652416	0.287347	0.148023	0.562824	0.232368	0.0430079	0.748541	0.348185	0.159275	0.549181	0.00663537	0.00663537	0.676505	0.505802				0.296377	0.25686	0.0560515
53.6887	0.0362181	0.142401	0.833275	0.475836	-0.00791897	0.29182	0.0867866	0.0644976	0.299471	0.157998	0.552329	0.243662	0.047531	0.741045	0.356246	0.145669	0.54183	-0.00300474	-0.00300474	0.663434	0.489385				0.293119	0.256982	0.0560781
53.787	0.0167123	0.14551	0.848627	0.459974	-0.0238492	0.297308	0.0927303	0.0614361	0.311972	0.16672	0.543128	0.254823	0.0508575	0.732339	0.364183	0.132638	0.529895	-0.0109845	-0.0109845	0.649528	0.471529				0.289719	0.257394	0.056168
53.8853	-5.93035e-05	0.146581	0.864422	0.446648	-0.0416883	0.305564	0.0941242	0.0597948	0.323592	0.173804	0.528835	0.264663	0.0543744	0.72402	0.37053	0.121121	0.519449	-0.0189605	-0.0189605	0.635989	0.452372				0.28601	0.258322	0.0563705
53.9836	-0.0149667	0.151687	0.88013	0.433268	-0.0524781	0.315067	0.0984665	0.0603127	0.33251	0.177861	0.514421	0.267022	0.0571437	0.715023	0.376262	0.111865	0.510203	-0.0258467	-0.0258467	0.616995	0.431706				0.282419	0.258328	0.0563717
54.0819	-0.0309822	0.157521	0.89656	0.420605	-0.0624261	0.323845	0.103387	0.0616093	0.341836	0.183082	0.501542	0.269599	0.0587934	0.705826	0.380141	0.103055	0.504014	-0.0366613	-0.0366613	0.596643	0.41298				0.278776	0.259334	0.0565914
54.1802	-0.0408932	0.164311	0.917062	0.412916	-0.0685911	0.331562	0.108302	0.0633141	0.349667	0.189919	0.482492	0.269275	0.06183	0.693817	0.380854	0.097936	0.502025	-0.0512751	-0.0512751	0.576613	0.385743				0.275029	0.260416	0.0568275
54.2786	-0.053848	0.179755	0.940284	0.400978	-0.0707297	0.341059	0.11354	0.0626019	0.355497	0.197958	0.460095	0.270627	0.062203	0.682381	0.380805	0.0938696	0.500251	-0.0612845	-0.0612845	0.555649	0.364418				0.272134	0.261516	0.0570674
54.3769	-0.0643483	0.198629	0.962115	0.389769	-0.0739965	0.352969	0.119424	0.0634611	0.36245	0.208228	0.436991	0.274735	0.0618832	0.668464	0.381517	0.0916508	0.495435	-0.0706599	-0.0706599	0.532314	0.345024				0.269781	0.262294	0.0572371
54.4752	-0.0701963	0.215245	0.987705	0.379593	-0.0770552	0.366288	0.119777	0.0636729	0.367502	0.211977	0.415985	0.279815	0.0597333	0.651303	0.380951	0.0908157	0.493794	-0.0812141	-0.0812141	0.508232	0.328465				0.267199	0.264196	0.0576524
54.5735	-0.0733897	0.232112	1.01121	0.368429	-0.0816642	0.381436	0.119918	0.0605959	0.370931	0.217612	0.391429	0.285161	0.0605986	0.633387	0.380711	0.0903009	0.489081	-0.0888266	-0.0888266	0.484738	0.315305				0.264774	0.265684	0.057977
54.6718	-0.0681671	0.250789	1.0287	0.350898	-0.086687	0.395582	0.121019	0.0566135	0.375087	0.227221	0.365974	0.287369	0.0694843	0.613682	0.378781	0.0912943	0.487621	-0.101058	-0.101058	0.462007	0.29982				0.262141	0.266483	0.0581515
54.7701	-0.0600072	0.266485	1.04825	0.333068	-0.0880248	0.409374	0.122375	0.0541499	0.377394	0.236925	0.34168	0.289999	0.0787191	0.594523	0.379512	0.0910047	0.483955	-0.114661	-0.114661	0.442372	0.28579				0.259915	0.26799	0.0584802
54.8684	-0.0474209	0.281165	1.06796	0.317728	-0.0832919	0.420708	0.119509	0.0528627	0.377224	0.241204	0.320234	0.29026	0.0862599	0.570805	0.379482	0.0905587	0.480364	-0.124029	-0.124029	0.423537	0.274254				0.257874	0.268699	0.0586349
54.9667	-0.0333179	0.298213	1.08864	0.302881	-0.077999	0.432605	0.113588	0.0517719	0.379029	0.243974	0.300901	0.286055	0.0893208	0.548389	0.379028	0.0929368	0.477121	-0.134191	-0.134191	0.406609	0.264217				0.25598	0.270366	0.0589986
55.065	-0.0209612	0.316217	1.11174	0.291759	-0.0704323	0.448258	0.108972	0.0470404	0.384154	0.242812	0.283399	0.282314	0.0935336	0.525289	0.378973	0.0954833	0.479876	-0.146267	-0.146267	0.392042	0.257245				0.255009	0.273669	0.0597195
55.1633	-0.00441376	0.333252	1.1359	0.277605	-0.0636646	0.464755	0.106946	0.0436105	0.385572	0.239959	0.266636	0.274834	0.0999957	0.504776	0.38004	0.0965262	0.486509	-0.161275	-0.161275	0.374866	0.249296				0.253831	0.277881	0.0606386
55.2616	0.0125729	0.350023	1.15933	0.26286	-0.0591963	0.479561	0.106607	0.0449859	0.381218	0.234791	0.252452	0.26054	0.102699	0.4831	0.383135	0.0970978	0.492282	-0.172405	-0.172405	0.358289	0.234911				0.252022	0.281699	0.0614719
55.3599	0.0365233	0.368045	1.17805	0.24915	-0.0522474	0.493093	0.107835	0.0473685	0.376559	0.227764	0.242276	0.244366	0.104761	0.458144	0.385728	0.0979804	0.504766	-0.182661	-0.182661	0.342849	0.223068				0.250988	0.284829	0.0621547
55.4582	0.0650158	0.383664	1.19819	0.236235	-0.0456827	0.505936	0.112985	0.0490658	0.367178	0.221146	0.228818	0.224437	0.103569	0.432671	0.386981	0.0988974	0.522892	-0.193904	-0.193904	0.329367	0.21013				0.249699	0.288835	0.063029
55.5565	0.0942517	0.399041	1.21891	0.225485	-0.0423651	0.519179	0.123325	0.0522847	0.356335	0.217444	0.21713	0.199686	0.0997605	0.409924	0.38834	0.0993821	0.54521	-0.204854	-0.204854	0.316113	0.195978				0.248843	0.293832	0.0641193
55.6548	0.124124	0.415746	1.23756	0.21611	-0.0393392	0.532951	0.135735	0.0578711	0.343972	0.213619	0.206099	0.173414	0.0964377	0.39298	0.387882	0.0995825	0.566872	-0.211738	-0.211738	0.300929	0.177674				0.248416	0.298542	0.0651472
55.7531	0.150341	0.429762	1.25321	0.209032	-0.0334399	0.547385	0.146591	0.0632516	0.330326	0.208867	0.193372	0.145993	0.0904586	0.380765	0.387776	0.10047	0.590028	-0.215018	-0.215018	0.295873	0.159391				0.248544	0.30309	0.0661396
55.8514	0.169799	0.442301	1.26383	0.204445	-0.0241787	0.561524	0.157776	0.0700435	0.314191	0.207229	0.182375	0.116718	0.0883917	0.371698	0.387844	0.101196	0.61633	-0.21988	-0.21988	0.292361	0.141563				0.248842	0.307533	0.0671093
55.9497	0.189871	0.455617	1.27176	0.19958	-0.0137145	0.573669	0.169305	0.0742894	0.300425	0.206515	0.176421	0.0879803	0.0876451	0.36094	0.387766	0.10267	0.641727	-0.227387	-0.227387	0.289896	0.122598				0.249056	0.312183	0.0681239
56.048	0.205912	0.463768	1.27537	0.197994	-0.00793793	0.583622	0.177477	0.0793083	0.287114	0.200743	0.172711	0.063358	0.0894097	0.350725	0.386732	0.102702	0.661241	-0.23201	-0.23201	0.292397	0.102346				0.248618	0.315643	0.0688789
56.1463	0.220564	0.469774	1.27542	0.1963	-0.000522345	0.58945	0.184157	0.0834658	0.27312	0.191058	0.168768	0.039306	0.092827	0.343247	0.386212	0.103126	0.677361	-0.236615	-0.236615	0.297578	0.078987				0.247475	0.318458	0.0694933
56.2446	0.231112	0.471862	1.27408	0.194877	0.00681872	0.591062	0.19149	0.086528	0.261832	0.178179	0.169909	0.0206256	0.0960675	0.336234	0.387691	0.104762	0.691177	-0.237676	-0.237676	0.306001	0.0582284				0.246818	0.320155	0.0698634
56.3429	0.243042	0.46558	1.26901	0.200255	0.00847198	0.587576	0.198551	0.0899716	0.252855	0.165639	0.174155	0.00183485	0.100751	0.329123	0.389198	0.10765	0.704685	-0.240896	-0.240896	0.313101	0.0310341				0.245271	0.321509	0.0701589
56.4412	0.251938	0.456604	1.26284	0.204344	0.0104316	0.581136	0.206327	0.0900777	0.242013	0.151812	0.179342	-0.018318	0.1054	0.324954	0.392375	0.110257	0.720291	-0.244119	-0.244119	0.32463	0.00551173				0.243511	0.323088	0.0705036
56.5395	0.258567	0.448035	1.25273	0.205316	0.0126168	0.575486	0.214421	0.0882868	0.233922	0.140594	0.183996	-0.0378814	0.107577	0.323629	0.396307	0.113495	0.72909	-0.242124	-0.242124	0.337237	-0.0207634				0.241829	0.323307	0.0705515
56.6378	0.264411	0.437909	1.24277	0.210699	0.0163159	0.565534	0.221721	0.0861332	0.228243	0.125665	0.191607	-0.0574455	0.109102	0.327777	0.397226	0.117604	0.738541	-0.241919	-0.241919	0.349563	-0.0523872				0.239864	0.324058	0.0707152
56.7362	0.266059	0.425225	1.23313	0.222493	0.0225114	0.553893	0.230254	0.0808117	0.221411	0.109286	0.199652	-0.0721266	0.105354	0.336219	0.399893	0.123405	0.748412	-0.234925	-0.234925	0.36549	-0.0825855				0.238997	0.324058	0.0707152
56.8345	0.26598	0.415282	1.22027	0.234618	0.0269221	0.539294	0.239792	0.0725427	0.215715	0.0923863	0.209893	-0.0872342	0.101929	0.3457	0.402121	0.128921	0.761493	-0.228971	-0.228971	0.380801	-0.111957				0.23793	0.324407	0.0707914
56.9328	0.262532	0.403936	1.20452	0.246458	0.02667	0.526627	0.254066	0.0633522	0.212877	0.0787931	0.218928	-0.102122	0.0948955	0.358225	0.405281	0.133032	0.774102	-0.228643	-0.228643	0.392963	-0.138284				0.23617	0.32554	0.0710386
57.0311	0.259	0.391711	1.18809	0.261458	0.0262867	0.511401	0.269844	0.0580216	0.203934	0.0637227	0.230068	-0.114444	0.0853349	0.371859	0.40914	0.136629	0.783418	-0.226495	-0.226495	0.404979	-0.167006				0.234308	0.326416	0.0712298
57.1294	0.255552	0.37652	1.17024	0.274653	0.0240467	0.491283	0.283063	0.0609566	0.19102	0.0534927	0.240713	-0.126112	0.0763022	0.386484	0.411916	0.139811	0.787289	-0.222654	-0.222654	0.414359	-0.194839				0.231973	0.326157	0.0711732
57.2277	0.248379	0.361956	1.1497	0.289249	0.0241232	0.471553	0.28973	0.0675599	0.184169	0.04422	0.252264	-0.136657	0.0668444	0.401295	0.413271	0.144549	0.791801	-0.219755	-0.219755	0.426419	-0.220942				0.229998	0.325744	0.0710832
57.326	0.237538	0.34757	1.12637	0.306472	0.0277562	0.451864	0.290009	0.0676904	0.182379	0.0379645	0.261927	-0.143448	0.0604832	0.416872	0.415036	0.149812	0.795103	-0.221462	-0.221462	0.439498	-0.241006				0.227951	0.325127	0.0709485
57.4243	0.222384	0.331687	1.10756	0.327042	0.0278822	0.432702	0.29064	0.0660614	0.182209	0.0347998	0.265791	-0.145462	0.0567719	0.436031	0.417737	0.153152	0.792597	-0.222184	-0.222184	0.450472	-0.262074				0.225886	0.324735	0.070863
57.5226	0.204828	0.315696	1.08807	0.34275	0.0271359	0.417079	0.289519	0.0633341	0.18314	0.0346063	0.272519	-0.145805	0.0521778	0.450511	0.419261	0.156129	0.787673	-0.219353	-0.219353	0.466087	-0.282881				0.223958	0.323834	0.0706663
57.6209	0.185998	0.297773	1.0646	0.357033	0.0268638	0.399758	0.282784	0.0596458	0.182639	0.0315269	0.278597	-0.147473	0.0501393	0.459153	0.41898	0.159776	0.780727	-0.217772	-0.217772	0.481551	-0.303055				0.220546	0.322412	0.0703561
57.7192	0.163095	0.279085	1.04212	0.370129	0.0269522	0.380331	0.275219	0.0549856	0.182024	0.0327996	0.286608	-0.150777	0.0464797	0.46531	0.419605	0.16296	0.776174	-0.220542	-0.220542	0.497113	-0.316715				0.216782	0.321626	0.0701845
57.8175	0.142412	0.259187	1.02081	0.38154	0.0276274	0.358718	0.268521	0.0477105	0.183018	0.0371151	0.297997	-0.153231	0.0457918	0.46872	0.418194	0.164757	0.76818	-0.224946	-0.224946	0.507858	-0.325108				0.212854	0.32022	0.0698778
57.9158	0.123144	0.235397	1.00299	0.394471	0.0265996	0.335454	0.26374	0.0382122	0.187607	0.0379911	0.308909	-0.156057	0.0429727	0.468994	0.417321	0.16708	0.758276	-0.230623	-0.230623	0.516864	-0.333021				0.208367	0.319552	0.0697319
58.0141	0.102082	0.208458	0.991267	0.405872	0.0259869	0.313745	0.262401	0.0295665	0.191966	0.037052	0.32071	-0.159588	0.0414246	0.471768	0.41654	0.168815	0.749537	-0.230092	-0.230092	0.526292	-0.338108				0.205029	0.319159	0.0696461
58.1124	0.0829381	0.184738	0.985632	0.412871	0.0250767	0.293307	0.260399	0.019717	0.19526	0.0413529	0.333343	-0.163937	0.0410308	0.47602	0.416192	0.170947	0.746857	-0.232424	-0.232424	0.531868	-0.336934				0.202468	0.319801	0.0697863
58.2107	0.0670629	0.160933	0.982014	0.420493	0.0255489	0.279662	0.255062	0.01301	0.19634	0.0489027	0.345598	-0.171543	0.0384578	0.477881	0.415447	0.174631	0.74546	-0.235126	-0.235126	0.53774	-0.3337				0.200417	0.320839	0.0700129
58.309	0.0486606	0.1371	0.97828	0.424383	0.0243201	0.27053	0.251591	0.00972775	0.196034	0.0578454	0.354223	-0.180806	0.033756	0.481372	0.414863	0.178408	0.74672	-0.23633	-0.23633	0.541151	-0.327407				0.19848	0.32177	0.070216
58.4073	0.0302189	0.117114	0.977118	0.422803	0.0256325	0.265076	0.25126	0.00762158	0.192833	0.0669144	0.361428	-0.19305	0.02607	0.485821	0.414744	0.182768	0.748002	-0.236888	-0.236888	0.544583	-0.315381				0.197038	0.322668	0.070412
58.5056	0.0141072	0.0984049	0.975592	0.424877	0.0286578	0.259037	0.24781	0.0106508	0.192119	0.0775107	0.367809	-0.204858	0.0177986	0.48846	0.412378	0.186167	0.74869	-0.234414	-0.234414	0.548438	-0.30534				0.196166	0.323063	0.0704982
58.6039	-0.00150352	0.0773685	0.975176	0.431653	0.031091	0.252456	0.246018	0.0164283	0.188531	0.0888001	0.373779	-0.216758	0.0133139	0.488909	0.41178	0.188906	0.75678	-0.235243	-0.235243	0.552729	-0.29422				0.19575	0.324708	0.0708572
58.7022	-0.0169584	0.0585559	0.975664	0.434078	0.0327378	0.249307	0.245496	0.0247266	0.185709	0.101365	0.377557	-0.229183	0.00924039	0.482584	0.414397	0.191331	0.766866	-0.234623	-0.234623	0.554699	-0.276851				0.195813	0.325622	0.0710566
58.8005	-0.0333221	0.0417335	0.97823	0.432102	0.0322035	0.244573	0.242225	0.0371154	0.187112	0.111653	0.38023	-0.244907	0.00673103	0.473329	0.414898	0.191213	0.773026	-0.239645	-0.239645	0.552487	-0.256474				0.194518	0.326678	0.071287
58.8988	-0.0487139	0.0209146	0.980508	0.429231	0.0292409	0.242089	0.238659	0.0503978	0.186776	0.122251	0.380843	-0.259707	0.00528384	0.459342	0.412714	0.190698	0.775387	-0.244312	-0.244312	0.547612	-0.238622				0.192204	0.32726	0.071414
58.9971	-0.0619249	0.000724324	0.985237	0.424999	0.0258265	0.234793	0.232547	0.0632705	0.186017	0.135449	0.38149	-0.274307	0.00813939	0.444479	0.41036	0.192213	0.777823	-0.24455	-0.24455	0.542514	-0.224507				0.190288	0.327666	0.0715027
59.0954	-0.0756766	-0.0199482	0.988783	0.418123	0.0242012	0.231078	0.227694	0.076365	0.185774	0.150156	0.379133	-0.289192	0.0170603	0.430528	0.406666	0.191834	0.778219	-0.246196	-0.246196	0.537907	-0.208169				0.188483	0.327766	0.0715244
59.1938	-0.0883852	-0.0380154	0.989685	0.412076	0.0216616	0.231861	0.225074	0.0866201	0.187825	0.15944	0.375375	-0.304012	0.0248602	0.417981	0.405264	0.191077	0.778533	-0.250331	-0.250331	0.530233	-0.195262				0.186249	0.328292	0.0716392
59.2921	-0.101758	-0.0559588	0.990665	0.405912	0.0164198	0.231719	0.227178	0.091872	0.185856	0.167838	0.370436	-0.318017	0.0326906	0.403295	0.404966	0.189839	0.775052	-0.252511	-0.252511	0.523021	-0.18158				0.183544	0.328474	0.0716789
59.3904	-0.11107	-0.0715578	0.993495	0.397928	0.00954984	0.233079	0.232563	0.100765	0.180151	0.176455	0.364513	-0.331688	0.0407366	0.387774	0.402413	0.18694	0.770743	-0.252271	-0.252271	0.512899	-0.169033				0.181053	0.328159	0.0716102
59.4887	-0.119021	-0.0868425	0.992986	0.386151	0.00248461	0.233312	0.232636	0.110541	0.172486	0.183155	0.360761	-0.34765	0.0469057	0.374226	0.401308	0.185628	0.772277	-0.251765	-0.251765	0.503678	-0.153302				0.178485	0.32813	0.0716039
59.587	-0.126196	-0.101567	0.992629	0.379108	-0.00241193	0.229984	0.231924	0.120449	0.167621	0.187174	0.353997	-0.364975	0.0553484	0.365812	0.402561	0.185066	0.773094	-0.253101	-0.253101	0.489644	-0.138188				0.175946	0.328478	0.0716798
59.6853	-0.133187	-0.115487	0.99539	0.37371	-0.00497515	0.226178	0.235201	0.128671	0.164067	0.190032	0.346398	-0.379397	0.0603622	0.364506	0.405924	0.184693	0.773388	-0.251012	-0.251012	0.477955	-0.123406				0.174667	0.329074	0.0718099
59.7836	-0.13719	-0.128978	0.994721	0.370889	-0.0081373	0.219733	0.235393	0.134138	0.159427	0.187508	0.338051	-0.390996	0.067213	0.361825	0.410301	0.185462	0.771267	-0.246434	-0.246434	0.469452	-0.113182				0.173049	0.328836	0.0717578
59.8819	-0.138702	-0.139175	0.990816	0.36946	-0.0130484	0.212949	0.232019	0.141804	0.154006	0.183237	0.328575	-0.399429	0.0742881	0.357766	0.415405	0.184059	0.771399	-0.241717	-0.241717	0.460375	-0.103939				0.171354	0.327987	0.0715727
59.9802	-0.135863	-0.141642	0.984477	0.365588	-0.0172195	0.206178	0.225452	0.153991	0.146024	0.181918	0.317839	-0.404252	0.0808937	0.355399	0.419864	0.183138	0.771571	-0.232186	-0.232186	0.451057	-0.0959952				0.170669	0.325458	0.0710207
60.0785	-0.131787	-0.140989	0.971996	0.364705	-0.0202188	0.195818	0.214691	0.167839	0.135636	0.182186	0.303567	-0.408993	0.0838865	0.353181	0.424365	0.183416	0.771352	-0.224812	-0.224812	0.442475	-0.0892846				0.169248	0.322405	0.0703544
Analysis of -10-0s vs. 25-35s
10-0	-0.105972	0.0713658	-0.00993174	0.0220883	-0.0613263	-0.0256864	-0.084104	0.0780911	-0.0368716	0.0237283	0.0495921	-0.153616	-0.0869987	0.0259417	-0.0173968	0.0311569	0.0316734	-0.0274727	-0.0274727	-0.082785	0.3288
25-35	-0.00211667	0.802572	0.863262	0.446418	0.747443	0.150547	0.399805	0.233959	0.21246	0.160848	0.00388246	0.015633	0.0479471	0.212234	0.0928745	0.00172131	0.238285	0.410257	0.410257	0.223114	2.64846

## Sheet: Laser in soma_CCK- KO
t	1012-1 side-2	1012-1 side-3	1012-2 side-2	1012-2 side-16	1013-1 side_7	1013-1 side_8	1013-2 side_1	1013-2 side_2	1013-2 side_3	1013-2 side_5	1014_1 side_1	1014_1 side_1	1014_1 side_2	1014_2 side_2	1019_1 side_5	1019_1 side_6	1019_2 side_2	1021_1 side_2	1021_2 side_2	1021_2 side_6		N=10,n=20	sd	se
-24.9545	-0.0208305	0.174022	0.276172	-0.0872957	-0.243909	0.351147	0.108895	-0.0820163	-0.0135566	-0.174127	-0.175241	-0.175241	-0.217431	0.386532	-0.249614	-0.12385	0.0181126	-0.0475335	-0.18304	-0.312101		-0.0395453	0.198048	0.044285
-24.8562	-0.0372162	0.187321	0.269089	-0.0824386	-0.256783	0.331156	0.106233	-0.0840262	-0.00442427	-0.178954	-0.1792	-0.1792	-0.214294	0.380771	-0.252957	-0.133114	0.0125976	-0.039542	-0.186061	-0.309687		-0.0425365	0.196796	0.0429443
-24.7579	-0.0549333	0.201623	0.265418	-0.0734967	-0.268779	0.312432	0.103252	-0.0890076	0.0043533	-0.182671	-0.184835	-0.184835	-0.212794	0.371367	-0.254075	-0.140611	0.00130182	-0.0350293	-0.188965	-0.300865		-0.0455576	0.195338	0.0426263
-24.6596	-0.0700873	0.21107	0.271246	-0.0654393	-0.283899	0.291916	0.0934008	-0.0914783	0.00954825	-0.179349	-0.189917	-0.189917	-0.205249	0.364099	-0.254097	-0.146765	-0.00818832	-0.0357363	-0.193059	-0.288039		-0.0479971	0.193769	0.0422838
-24.5613	-0.0874701	0.224349	0.280646	-0.0598241	-0.295969	0.266307	0.0854773	-0.0888648	0.0172447	-0.171557	-0.192266	-0.192266	-0.199106	0.353818	-0.253327	-0.153778	-0.0184737	-0.0336781	-0.198508	-0.274278		-0.0495761	0.192004	0.0418988
-24.4629	-0.103103	0.240034	0.290671	-0.0527072	-0.309489	0.242076	0.0810547	-0.0842066	0.0233674	-0.161513	-0.198344	-0.198344	-0.187765	0.343229	-0.251587	-0.162532	-0.0333824	-0.0296182	-0.202953	-0.266289		-0.0510701	0.191517	0.0417924
-24.3646	-0.112865	0.25384	0.301572	-0.0407202	-0.321512	0.216787	0.0798649	-0.076982	0.0306178	-0.152873	-0.204642	-0.204642	-0.171572	0.329486	-0.244778	-0.17182	-0.0515839	-0.0261112	-0.207906	-0.259478		-0.0517659	0.190821	0.0416405
-24.2663	-0.117846	0.262665	0.310837	-0.0299329	-0.326531	0.189545	0.0818126	-0.0725375	0.0427578	-0.139339	-0.216367	-0.216367	-0.150235	0.310612	-0.234966	-0.178118	-0.0715603	-0.0207666	-0.210313	-0.254164		-0.0520406	0.189206	0.0412881
-24.168	-0.116101	0.265881	0.323037	-0.0157849	-0.331415	0.164499	0.0820514	-0.071179	0.0560643	-0.118823	-0.235646	-0.235646	-0.130097	0.291143	-0.227502	-0.179445	-0.0882141	-0.0115654	-0.21158	-0.243851		-0.0517086	0.188428	0.0411185
-24.0697	-0.114191	0.265508	0.334648	-0.00193327	-0.338615	0.140771	0.0839382	-0.0684385	0.0672513	-0.0932526	-0.260242	-0.260242	-0.107713	0.26901	-0.219675	-0.180879	-0.106367	-0.00576792	-0.210842	-0.23045		-0.0518742	0.188472	0.041128
-23.9714	-0.110013	0.265407	0.347643	0.00750357	-0.34702	0.121976	0.0890291	-0.0624808	0.0777409	-0.0634553	-0.282159	-0.282159	-0.089906	0.245432	-0.207329	-0.185395	-0.130544	-0.00293922	-0.211584	-0.220211		-0.0520233	0.189966	0.041454
-23.8731	-0.104117	0.26342	0.363976	0.014832	-0.360327	0.10933	0.0934644	-0.0576402	0.0863641	-0.0370485	-0.30116	-0.30116	-0.0727246	0.223412	-0.196553	-0.185575	-0.153237	0.00175852	-0.212539	-0.213044		-0.0519284	0.193053	0.0421276
-23.7748	-0.0962259	0.260221	0.378771	0.0204129	-0.372831	0.0970448	0.0960087	-0.0559625	0.0930042	-0.0099272	-0.325729	-0.325729	-0.0529488	0.201425	-0.1877	-0.188452	-0.178519	0.00871563	-0.209077	-0.208554		-0.0528027	0.197495	0.043097
-23.6765	-0.0874152	0.254067	0.388957	0.0221354	-0.384941	0.0872531	0.0979006	-0.0494977	0.0939249	0.0168085	-0.351449	-0.351449	-0.0292304	0.177775	-0.18477	-0.19039	-0.199996	0.0118608	-0.198527	-0.202876		-0.053993	0.201642	0.0440018
-23.5782	-0.0797108	0.249748	0.397648	0.0202368	-0.394208	0.0788299	0.101959	-0.0406286	0.0930236	0.0421478	-0.370302	-0.370302	-0.00939822	0.160042	-0.181779	-0.195419	-0.218171	0.0121591	-0.190159	-0.196752		-0.0545518	0.205625	0.0448711
-23.4799	-0.0704548	0.244434	0.406038	0.0184687	-0.401645	0.0727832	0.104308	-0.0304838	0.0886212	0.064991	-0.382345	-0.382345	0.00843286	0.143411	-0.177631	-0.197235	-0.240503	0.0110945	-0.175585	-0.192		-0.0543823	0.208615	0.0455235
-23.3816	-0.0594443	0.237102	0.415301	0.0185648	-0.410085	0.0728592	0.110059	-0.0248551	0.0739466	0.0855329	-0.395541	-0.395541	0.0221866	0.127034	-0.174223	-0.197175	-0.265247	0.00817003	-0.155414	-0.186211		-0.0546489	0.212114	0.0462872
-23.2833	-0.0465476	0.228708	0.419398	0.0222581	-0.411078	0.0765154	0.118455	-0.0217529	0.0521	0.106462	-0.410596	-0.410596	0.0367694	0.111011	-0.169437	-0.198658	-0.288768	0.0042431	-0.13433	-0.177756		-0.05468	0.215236	0.0469684
-23.185	-0.0329181	0.21829	0.419163	0.0223872	-0.407603	0.0818467	0.123437	-0.0172825	0.0314119	0.127336	-0.423265	-0.423265	0.0478611	0.0964639	-0.15846	-0.199324	-0.309026	-0.00711721	-0.118587	-0.165877		-0.0547262	0.21708	0.0473708
-23.0867	-0.0208206	0.20589	0.415459	0.023337	-0.401653	0.0876668	0.128156	-0.00797851	0.00649295	0.147886	-0.438484	-0.438484	0.0575412	0.0837208	-0.147812	-0.200903	-0.328419	-0.0201231	-0.103012	-0.154373		-0.0552956	0.219318	0.0478591
-22.9884	-0.0109234	0.193544	0.405935	0.0218794	-0.396445	0.0928624	0.135264	-0.000562107	-0.0181823	0.169888	-0.453017	-0.453017	0.0685138	0.0721445	-0.136687	-0.204471	-0.345072	-0.0324527	-0.0852761	-0.14182		-0.0558946	0.221584	0.0483536
-22.8901	-0.00154509	0.182973	0.393901	0.0228509	-0.390908	0.101542	0.147628	0.0124287	-0.0388105	0.193054	-0.463349	-0.463349	0.0752542	0.063922	-0.130548	-0.206455	-0.358777	-0.043645	-0.0663631	-0.126842		-0.054852	0.223914	0.0488621
-22.7918	0.00660774	0.171795	0.38103	0.0196785	-0.378829	0.107925	0.160768	0.0309713	-0.0580953	0.220511	-0.475558	-0.475558	0.0822318	0.0614879	-0.125766	-0.208546	-0.371665	-0.0510136	-0.0529793	-0.121415		-0.0538209	0.227113	0.0495601
-22.6935	0.0156036	0.160149	0.363266	0.013048	-0.366189	0.109026	0.176833	0.0534421	-0.0775896	0.24757	-0.485689	-0.485689	0.0888084	0.0595886	-0.121803	-0.211007	-0.379027	-0.0578895	-0.0345979	-0.126448		-0.0529297	0.229804	0.0501473
-22.5952	0.023329	0.148872	0.340051	0.00759427	-0.350202	0.115413	0.195419	0.0739607	-0.0891705	0.268749	-0.49502	-0.49502	0.0869988	0.0570202	-0.119146	-0.212469	-0.381672	-0.0634701	-0.0141549	-0.132634		-0.0517775	0.231551	0.0505287
-22.4969	0.0295279	0.137943	0.315321	0.00199541	-0.330449	0.123836	0.209261	0.0935519	-0.101125	0.2933	-0.505613	-0.505613	0.0828539	0.0548384	-0.118196	-0.211041	-0.383757	-0.0683318	0.00772815	-0.141923		-0.0507947	0.233759	0.0510104
-22.3986	0.0320461	0.125719	0.28912	-0.00419812	-0.311879	0.130111	0.217004	0.10921	-0.110528	0.313011	-0.512593	-0.512593	0.080092	0.0533114	-0.119945	-0.211549	-0.381592	-0.075168	0.0283568	-0.1454		-0.0503733	0.234543	0.0511814
-22.3003	0.0284058	0.115189	0.259898	-0.0114148	-0.294723	0.139101	0.225404	0.125188	-0.119605	0.330008	-0.517167	-0.517167	0.0761317	0.0553663	-0.123537	-0.210552	-0.375616	-0.0848151	0.0468049	-0.148154		-0.0500628	0.234875	0.051254
-22.202	0.0211063	0.1058	0.230745	-0.0235643	-0.278294	0.150425	0.229874	0.144714	-0.127605	0.347967	-0.514162	-0.514162	0.0689379	0.0641442	-0.128583	-0.208176	-0.369029	-0.0964406	0.0682086	-0.150003		-0.0489048	0.234406	0.0511516
-22.1037	0.00896137	0.0999335	0.201281	-0.0382273	-0.260301	0.161811	0.231469	0.162727	-0.133419	0.358888	-0.507021	-0.507021	0.0633058	0.0724672	-0.135307	-0.206922	-0.360354	-0.113596	0.0870019	-0.158871		-0.0486597	0.232957	0.0508354
-22.0053	-0.00294383	0.0996483	0.175209	-0.0527531	-0.240874	0.176894	0.230817	0.177524	-0.137343	0.364012	-0.494373	-0.494373	0.0577968	0.0820176	-0.145221	-0.204619	-0.348972	-0.127849	0.101271	-0.171949		-0.0478039	0.23054	0.0503079
-21.907	-0.017416	0.10159	0.148144	-0.0643798	-0.221512	0.188967	0.228113	0.191894	-0.142264	0.362428	-0.480061	-0.480061	0.0568599	0.0897996	-0.154466	-0.198348	-0.329686	-0.138183	0.116141	-0.182744		-0.0462592	0.226851	0.049503
-21.8087	-0.0341514	0.103887	0.118874	-0.0771864	-0.19569	0.197765	0.22744	0.207516	-0.148425	0.363248	-0.463806	-0.463806	0.0558413	0.0992341	-0.162736	-0.191813	-0.313617	-0.148032	0.129328	-0.189548		-0.044284	0.223428	0.0487559
-21.7104	-0.0482083	0.10653	0.0903657	-0.0912512	-0.166974	0.209827	0.22837	0.227656	-0.157784	0.360974	-0.442372	-0.442372	0.0535631	0.110222	-0.173714	-0.178702	-0.297432	-0.157103	0.139304	-0.195067		-0.0412083	0.219819	0.0479684
-21.6121	-0.0612399	0.112632	0.0626199	-0.101354	-0.137633	0.221154	0.230066	0.244077	-0.163298	0.358128	-0.418333	-0.418333	0.0471149	0.123634	-0.182656	-0.166617	-0.278272	-0.162427	0.146772	-0.201783		-0.0372873	0.215964	0.0471273
-21.5138	-0.0713369	0.118576	0.0367582	-0.107818	-0.10588	0.230892	0.229809	0.258203	-0.169929	0.36045	-0.398018	-0.398018	0.0423114	0.132338	-0.191694	-0.150521	-0.26197	-0.166223	0.154166	-0.210463		-0.0334184	0.213595	0.0466102
-21.4155	-0.0817378	0.123519	0.0146688	-0.114832	-0.0780956	0.236006	0.226166	0.274354	-0.175493	0.361771	-0.382165	-0.382165	0.0399378	0.138321	-0.200716	-0.132268	-0.237941	-0.166513	0.155605	-0.217773		-0.0299675	0.211408	0.0461329
-21.3172	-0.0930045	0.127501	-0.00748955	-0.124152	-0.0543797	0.234811	0.220129	0.292473	-0.17229	0.358873	-0.361606	-0.361606	0.0380858	0.145392	-0.20959	-0.113781	-0.210062	-0.162652	0.154263	-0.229186		-0.0264137	0.207951	0.0453786
-21.2189	-0.104465	0.131484	-0.0250819	-0.137711	-0.037595	0.230288	0.20957	0.310034	-0.162292	0.356274	-0.335908	-0.335908	0.0347113	0.149181	-0.220012	-0.092018	-0.182653	-0.161334	0.153737	-0.242231		-0.0230965	0.204033	0.0445235
-21.1206	-0.114051	0.137112	-0.042115	-0.146793	-0.0215374	0.223532	0.197543	0.32619	-0.152942	0.352314	-0.311191	-0.311191	0.0318577	0.149954	-0.234639	-0.0692591	-0.155262	-0.155934	0.159697	-0.256763		-0.0196738	0.200953	0.0438516
-21.0223	-0.121832	0.140222	-0.0520898	-0.154492	-0.00494511	0.214423	0.18489	0.341304	-0.140009	0.344347	-0.284559	-0.284559	0.0284738	0.149405	-0.247771	-0.04636	-0.13113	-0.144231	0.163583	-0.272267		-0.0158799	0.197282	0.0430504
-20.924	-0.124909	0.141418	-0.0574962	-0.1563	0.0117499	0.208679	0.171681	0.353052	-0.128095	0.334152	-0.260221	-0.260221	0.0235544	0.14961	-0.257725	-0.0215953	-0.103894	-0.131478	0.169314	-0.290106		-0.0114416	0.194005	0.0423353
-20.8257	-0.129443	0.142214	-0.0631516	-0.157033	0.0245056	0.202841	0.15531	0.358778	-0.118152	0.320882	-0.238008	-0.238008	0.0208622	0.151088	-0.264255	0.00193691	-0.0761062	-0.119671	0.175709	-0.310941		-0.00803209	0.191038	0.041688
-20.7274	-0.132692	0.137843	-0.0651151	-0.153838	0.0329963	0.195278	0.135456	0.362807	-0.106025	0.303597	-0.211666	-0.211666	0.0193949	0.151926	-0.266629	0.0290848	-0.0478669	-0.112567	0.186547	-0.324662		-0.00388998	0.18668	0.040737
-20.6291	-0.135086	0.133405	-0.0612082	-0.149087	0.0424994	0.191468	0.112464	0.363204	-0.0938724	0.282382	-0.185671	-0.185671	0.0207194	0.151131	-0.268896	0.0561961	-0.0206001	-0.10572	0.193371	-0.331324		0.000485185	0.181665	0.0396426
-20.5308	-0.133975	0.13066	-0.0566894	-0.145531	0.0498259	0.182439	0.0929677	0.36005	-0.0889515	0.261367	-0.159758	-0.159758	0.0236408	0.148005	-0.265845	0.0795219	0.00333473	-0.100769	0.198779	-0.338383		0.00404662	0.176642	0.0385464
-20.4325	-0.127453	0.127379	-0.0510138	-0.142415	0.0522809	0.173603	0.0727078	0.355223	-0.0850913	0.233166	-0.130191	-0.130191	0.0300986	0.148727	-0.262213	0.103104	0.0273313	-0.0982371	0.202591	-0.339894		0.00797558	0.170779	0.037267
-20.3342	-0.11975	0.124993	-0.0418664	-0.138484	0.0525273	0.163045	0.0576241	0.352603	-0.0848902	0.210132	-0.102668	-0.102668	0.0347333	0.149658	-0.255291	0.130906	0.0492202	-0.0937528	0.206749	-0.346484		0.0123167	0.166916	0.036424
-20.2359	-0.107992	0.120439	-0.0287077	-0.137568	0.0541251	0.14999	0.0410012	0.342008	-0.0872339	0.189282	-0.0774384	-0.0774384	0.0409333	0.148229	-0.250764	0.153876	0.0673064	-0.0901556	0.212528	-0.354006		0.0154207	0.163405	0.0356579
-20.1376	-0.0927216	0.11656	-0.0145834	-0.13078	0.0553043	0.1352	0.0276395	0.32487	-0.0924279	0.166886	-0.0560775	-0.0560775	0.0436186	0.140007	-0.245139	0.172091	0.0856682	-0.0839518	0.212866	-0.35928		0.0174837	0.158699	0.0346309
-20.0393	-0.0735002	0.117173	0.00115021	-0.126186	0.0540785	0.11967	0.0202569	0.309567	-0.0974018	0.148852	-0.0333128	-0.0333128	0.0450978	0.131786	-0.232689	0.190538	0.0991599	-0.0749438	0.213933	-0.360292		0.0209812	0.154026	0.0336112
-19.941	-0.0534295	0.113046	0.0109364	-0.123575	0.0526228	0.0992693	0.0134726	0.294186	-0.101635	0.130865	-0.0117493	-0.0117493	0.0438188	0.120363	-0.213434	0.207159	0.109851	-0.0690039	0.220424	-0.359203		0.0236117	0.149378	0.0325969
-19.8427	-0.0331561	0.108856	0.0192298	-0.1197	0.0465986	0.081064	0.00808305	0.276413	-0.103524	0.113733	0.00692547	0.00692547	0.0392068	0.1105	-0.196203	0.219661	0.115739	-0.0662739	0.226121	-0.357467		0.0251366	0.145115	0.0316666
-19.7444	-0.0107187	0.107576	0.0283268	-0.113145	0.0406575	0.0661629	0.00108074	0.259202	-0.103905	0.0979865	0.0220284	0.0220284	0.0339415	0.100392	-0.179956	0.228045	0.1208	-0.0638765	0.23357	-0.359701		0.0265249	0.142133	0.0310161
-19.6461	0.00805119	0.107674	0.039235	-0.104112	0.034756	0.0499023	-0.0100052	0.240615	-0.0976857	0.0872463	0.0383529	0.0383529	0.0320889	0.0912203	-0.159171	0.232336	0.130765	-0.0642909	0.241638	-0.363908		0.028653	0.139665	0.0304773
-19.5478	0.0255321	0.107509	0.0503246	-0.0977058	0.0301838	0.033492	-0.0217137	0.22549	-0.0925867	0.0781728	0.052835	0.052835	0.0309478	0.0817423	-0.137701	0.237811	0.139191	-0.0626427	0.24729	-0.369269		0.0305869	0.138412	0.0302041
-19.4494	0.0430622	0.106648	0.0588048	-0.093115	0.0208268	0.0172145	-0.0319453	0.206857	-0.0837185	0.0666571	0.0659873	0.0659873	0.0293279	0.0716563	-0.117559	0.239132	0.147565	-0.0595521	0.252317	-0.367512		0.031932	0.136146	0.0297095
-19.3511	0.0629707	0.109287	0.0633687	-0.0877261	0.0133728	0.00655845	-0.0368422	0.182036	-0.0748269	0.0577833	0.0805193	0.0805193	0.0264031	0.0630614	-0.0976962	0.236237	0.149336	-0.0623866	0.259896	-0.36644		0.0332715	0.134191	0.0292829
-19.2528	0.0826791	0.112073	0.0693904	-0.0816028	0.0107961	0.00303528	-0.0393045	0.159813	-0.0738101	0.0562387	0.0918497	0.0918497	0.0252495	0.0547272	-0.0748416	0.230841	0.148967	-0.0687701	0.264169	-0.359616		0.0351866	0.131786	0.0287582
-19.1545	0.100689	0.115471	0.0757575	-0.0721831	0.00975699	0.0050889	-0.0359544	0.140336	-0.0741913	0.053664	0.0965611	0.0965611	0.0245379	0.0468115	-0.0527226	0.221907	0.149819	-0.0713979	0.265802	-0.349551		0.0373382	0.128428	0.0280253
-19.0562	0.117162	0.117065	0.0844068	-0.0600921	0.00530206	0.0147833	-0.0289502	0.120774	-0.0716003	0.0494152	0.10068	0.10068	0.0256715	0.0415862	-0.0294179	0.213521	0.150879	-0.0707944	0.262749	-0.339734		0.0402043	0.124585	0.0271867
-18.9579	0.131222	0.122362	0.0879452	-0.0521406	-0.00579629	0.0283024	-0.0248153	0.0981579	-0.0693505	0.0480318	0.10068	0.10068	0.0271472	0.0366495	-0.00557486	0.205395	0.155878	-0.0761104	0.262469	-0.331596		0.0419768	0.122293	0.0266866
-18.8596	0.139357	0.129708	0.0852559	-0.050607	-0.0169203	0.0359715	-0.0234242	0.0782973	-0.0680241	0.0477909	0.0971181	0.0971181	0.0280646	0.0266518	0.0148881	0.194319	0.16027	-0.0853524	0.258776	-0.322564		0.0413347	0.120292	0.0262498
-18.7613	0.147213	0.134918	0.0834002	-0.0481909	-0.0277134	0.0400637	-0.0197814	0.0614898	-0.0690357	0.0489591	0.0932422	0.0932422	0.0298379	0.0147261	0.0351364	0.181432	0.163177	-0.0939966	0.25348	-0.310751		0.0405424	0.118092	0.0257698
-18.663	0.155536	0.14508	0.0800964	-0.0467883	-0.0395612	0.0461032	-0.0150696	0.0433501	-0.0726688	0.0500089	0.0855686	0.0855686	0.032344	0.00316817	0.0495873	0.165097	0.167384	-0.103597	0.242553	-0.299442		0.0387158	0.116213	0.0253597
-18.5647	0.16419	0.155414	0.0771387	-0.045363	-0.0491021	0.0505958	-0.00890256	0.0235366	-0.0750248	0.0526221	0.0767217	0.0767217	0.0326408	-0.00358312	0.0639078	0.148078	0.170756	-0.112051	0.229253	-0.292969		0.0367291	0.115131	0.0251237
-18.4664	0.16796	0.162409	0.0780937	-0.047606	-0.0575644	0.0595239	-0.00455672	0.00737663	-0.0752357	0.0569196	0.0655672	0.0655672	0.0358648	-0.00479475	0.0720854	0.13233	0.173446	-0.116401	0.214552	-0.288297		0.0348621	0.11399	0.0248746
-18.3681	0.16821	0.167596	0.0796153	-0.0501446	-0.0642459	0.0710407	0.00332796	-0.00521581	-0.0691402	0.0647779	0.0497786	0.0497786	0.0361979	-0.00675913	0.0779073	0.111655	0.178365	-0.117061	0.200513	-0.287454		0.0329371	0.1129	0.0246368
-18.2698	0.167382	0.171233	0.0781212	-0.053514	-0.0635091	0.0881248	0.00962603	-0.0149997	-0.0608337	0.0692452	0.0341848	0.0341848	0.0339086	-0.00880923	0.0815944	0.0850999	0.183705	-0.120204	0.188241	-0.281813		0.0310484	0.111389	0.0243071
-18.1715	0.163508	0.172223	0.0760298	-0.0522186	-0.0650966	0.105374	0.0164456	-0.0200924	-0.0490213	0.0764356	0.0188139	0.0188139	0.0318491	-0.00733868	0.0877018	0.0650138	0.190207	-0.1221	0.17431	-0.271889		0.0304484	0.109478	0.0238902
-18.0732	0.156974	0.175171	0.0724767	-0.0532721	-0.0705529	0.120632	0.0242131	-0.0195116	-0.0345158	0.0829658	0.00426752	0.00426752	0.0360293	-6.63289e-05	0.0924362	0.0467537	0.196596	-0.124933	0.159913	-0.263012		0.0303416	0.108316	0.0236365
-17.9749	0.147524	0.170721	0.064243	-0.0518859	-0.0749107	0.134381	0.0286293	-0.0192031	-0.0248888	0.0904615	-0.0118972	-0.0118972	0.0419233	0.00702327	0.0919432	0.0247597	0.202109	-0.124618	0.145954	-0.253647		0.0288362	0.106755	0.0232958
-17.8766	0.139102	0.168451	0.0600255	-0.0468554	-0.080871	0.150488	0.0330756	-0.016019	-0.0166958	0.101351	-0.0295031	-0.0295031	0.0493616	0.0195916	0.0844304	0.00434428	0.209168	-0.122277	0.126434	-0.2427		0.0280699	0.105866	0.0231019
-17.7783	0.13327	0.165243	0.0579881	-0.0453893	-0.0836671	0.165564	0.0381242	-0.00821872	-0.00814512	0.113792	-0.0469958	-0.0469958	0.056808	0.0374891	0.0769004	-0.0125989	0.21706	-0.114968	0.108983	-0.233445		0.0285399	0.10606	0.0231442
-17.68	0.126097	0.160548	0.0569648	-0.0459037	-0.0911807	0.175629	0.0447001	-0.00474816	0.00361072	0.124096	-0.0632598	-0.0632598	0.0647815	0.0518999	0.0703689	-0.025472	0.223334	-0.11012	0.091431	-0.222665		0.0283426	0.106769	0.023299
-17.5817	0.119981	0.149585	0.052996	-0.0441013	-0.102242	0.182861	0.0539625	-0.0042276	0.0116998	0.129026	-0.0820704	-0.0820704	0.0679557	0.064806	0.0626863	-0.0379102	0.223551	-0.106506	0.0737079	-0.209425		0.0262132	0.107157	0.0233836
-17.4834	0.116215	0.138126	0.0520142	-0.0396609	-0.1148	0.191335	0.0669699	-0.00705317	0.0224317	0.13305	-0.100705	-0.100705	0.0701419	0.0792447	0.0551154	-0.0519165	0.222027	-0.106716	0.0516728	-0.19502		0.0240883	0.108717	0.0237241
-17.3851	0.111484	0.12608	0.0551814	-0.0339341	-0.123615	0.202581	0.0790147	-0.00374276	0.0316358	0.133988	-0.115299	-0.115299	0.0725733	0.100057	0.048881	-0.0645161	0.221472	-0.107702	0.033798	-0.185682		0.0233479	0.111319	0.0242917
-17.2868	0.103944	0.108975	0.056279	-0.0276856	-0.130718	0.212053	0.0885	0.00268282	0.0372298	0.130875	-0.12959	-0.12959	0.0760039	0.119271	0.0418225	-0.0734846	0.225355	-0.103465	0.0155137	-0.176161		0.0223905	0.113687	0.0248086
-17.1885	0.0976445	0.0914748	0.0530205	-0.0197557	-0.138591	0.214929	0.0952793	0.00360896	0.047631	0.124375	-0.146939	-0.146939	0.0776929	0.135465	0.0300267	-0.0797844	0.227788	-0.0983456	0.000960982	-0.169304		0.020012	0.116272	0.0253727
-17.0902	0.0903146	0.0739538	0.050531	-0.0105122	-0.145322	0.214113	0.0954482	0.00359186	0.0554126	0.121009	-0.161354	-0.161354	0.076811	0.153468	0.0199892	-0.0856624	0.230203	-0.0954944	-0.0124777	-0.165051		0.0173808	0.118916	0.0259495
-16.9918	0.0834306	0.0548259	0.0426535	-0.00554181	-0.14599	0.205076	0.0946176	0.00561404	0.0592665	0.119186	-0.172875	-0.172875	0.0736153	0.170058	0.0116101	-0.0958254	0.230419	-0.0946092	-0.0254102	-0.16287		0.0137188	0.120575	0.0263117
-16.8935	0.0775743	0.0339085	0.035665	0.00409779	-0.140975	0.192701	0.0995508	0.0105259	0.0602144	0.114221	-0.179146	-0.179146	0.0677958	0.188634	0.00272765	-0.107805	0.229113	-0.0919783	-0.0410207	-0.156522		0.0110068	0.121009	0.0264064
-16.7952	0.0735145	0.0141898	0.0338749	0.0192048	-0.138518	0.183876	0.103608	0.0145164	0.0607927	0.108562	-0.178101	-0.178101	0.0628102	0.21015	-0.00620195	-0.11838	0.223277	-0.0869081	-0.0536482	-0.148879		0.00998192	0.120955	0.0263946
-16.6969	0.0723321	-0.00395034	0.0315119	0.0326357	-0.13323	0.177346	0.104776	0.0165361	0.06101	0.102007	-0.172769	-0.172769	0.0591659	0.231458	-0.0135888	-0.125165	0.217969	-0.0822936	-0.0658829	-0.146454		0.00953228	0.120988	0.0264018
-16.5986	0.0702086	-0.022291	0.0282127	0.0460481	-0.125672	0.172541	0.108556	0.018618	0.0626222	0.100222	-0.166756	-0.166756	0.0520728	0.250854	-0.017597	-0.133621	0.21347	-0.073291	-0.0736657	-0.146899		0.00984393	0.121538	0.0265218
-16.5003	0.0640159	-0.0375475	0.0240183	0.0592653	-0.122063	0.169056	0.111853	0.0258479	0.0639321	0.100258	-0.159157	-0.159157	0.0462603	0.265442	-0.02137	-0.141871	0.204427	-0.0617482	-0.0759915	-0.141834		0.0106818	0.121131	0.0264329
-16.402	0.0597972	-0.0511351	0.0160052	0.0805516	-0.117284	0.160418	0.11527	0.03068	0.0653756	0.0983579	-0.147735	-0.147735	0.0396452	0.272937	-0.0223168	-0.148446	0.193607	-0.0557773	-0.0778762	-0.135164		0.0114587	0.119406	0.0260565
-16.3037	0.0547065	-0.0622211	0.0055849	0.104222	-0.111999	0.146034	0.116984	0.033109	0.0564594	0.0985603	-0.131774	-0.131774	0.032414	0.277005	-0.0212699	-0.14899	0.177996	-0.0540234	-0.082089	-0.126459		0.0116238	0.115996	0.0253124
-16.2054	0.0492746	-0.0692966	-0.00170408	0.128689	-0.11105	0.128822	0.120304	0.0325853	0.0478129	0.100765	-0.115828	-0.115828	0.0252904	0.28147	-0.0194399	-0.146458	0.164718	-0.0510945	-0.0896049	-0.119137		0.0120145	0.113644	0.0247992
-16.1071	0.046154	-0.0700029	-0.00856776	0.149995	-0.106808	0.11157	0.122566	0.0350048	0.0362754	0.0959739	-0.0989574	-0.0989574	0.0180843	0.27926	-0.0191338	-0.144572	0.150934	-0.0491759	-0.0958012	-0.117297		0.0118272	0.11062	0.0241393
-16.0088	0.0432455	-0.0728734	-0.0144525	0.167069	-0.0962031	0.0989564	0.120065	0.0371894	0.0235759	0.090651	-0.0819435	-0.0819435	0.00680791	0.273427	-0.0183444	-0.141001	0.137088	-0.047411	-0.0997401	-0.118184		0.0112989	0.107187	0.0233901
-15.9105	0.0386078	-0.0713872	-0.0133968	0.18155	-0.0862113	0.0895002	0.11989	0.0416877	0.0155024	0.0818275	-0.0679084	-0.0679084	-0.00621998	0.268742	-0.0167219	-0.132358	0.126281	-0.0501575	-0.102918	-0.121203		0.0113599	0.104562	0.0228173
-15.8122	0.0324227	-0.072404	-0.0126035	0.192465	-0.0761623	0.076672	0.12128	0.0450263	0.00572296	0.0711391	-0.0542163	-0.0542163	-0.0187107	0.261501	-0.0125985	-0.124701	0.113839	-0.0514319	-0.102445	-0.129483		0.0105547	0.101971	0.0222519
-15.7139	0.02471	-0.071326	-0.0146088	0.203598	-0.0615037	0.0620069	0.120061	0.0422273	-0.0026748	0.0643348	-0.0395956	-0.0395956	-0.0334633	0.248423	-0.0079754	-0.11741	0.101814	-0.0598651	-0.104128	-0.13657		0.0089229	0.0992484	0.0216578
-15.6156	0.0168508	-0.0689924	-0.0203755	0.214672	-0.0408625	0.0515036	0.120839	0.0446719	-0.0142653	0.0603164	-0.0255561	-0.0255561	-0.0472162	0.239314	-0.00372126	-0.111093	0.0950024	-0.0633417	-0.104931	-0.143388		0.00869355	0.0981234	0.0214123
-15.5173	0.00913099	-0.06261	-0.0240597	0.218957	-0.0166074	0.0400087	0.119508	0.0518279	-0.0252125	0.059767	-0.0128738	-0.0128738	-0.0571285	0.228774	-0.00124563	-0.104926	0.0913183	-0.0612493	-0.10565	-0.153165		0.00908454	0.0968459	0.0211335
-15.419	-0.000635722	-0.0576874	-0.0313401	0.218644	0.00704057	0.0258638	0.114301	0.0594673	-0.0371533	0.0581895	9.2077e-05	9.2077e-05	-0.0671099	0.216933	-0.0010068	-0.0974639	0.0854742	-0.0584385	-0.0979501	-0.159653		0.00888294	0.0947342	0.0206727
-15.3207	-0.0102704	-0.0519347	-0.0458997	0.21844	0.0301667	0.00273469	0.111151	0.064254	-0.0501151	0.0626779	0.0101071	0.0101071	-0.0779768	0.200917	-0.00386138	-0.0888028	0.0813707	-0.057468	-0.0954407	-0.167936		0.00711103	0.0941391	0.0205428
-15.2224	-0.0209311	-0.0453795	-0.0540199	0.217411	0.0528755	-0.0242901	0.106255	0.0689925	-0.0594985	0.0738434	0.0232761	0.0232761	-0.0895194	0.186632	-0.00541447	-0.082734	0.0757012	-0.0587131	-0.0910651	-0.176572		0.0060063	0.0948267	0.0206929
-15.1241	-0.0320484	-0.0387431	-0.0593112	0.212059	0.0745817	-0.0449761	0.104013	0.074195	-0.0649785	0.0848093	0.0396925	0.0396925	-0.0978154	0.176768	-0.0058307	-0.0763025	0.0677868	-0.057831	-0.0872993	-0.185487		0.00614874	0.0962731	0.0210085
-15.0258	-0.0426959	-0.0321768	-0.0717703	0.203088	0.0934423	-0.0646755	0.104421	0.0772754	-0.0664249	0.0935839	0.057716	0.057716	-0.102642	0.165998	-0.00672042	-0.0691622	0.0585596	-0.0556236	-0.0871793	-0.193153		0.00597879	0.0981102	0.0214094
-14.9275	-0.0574392	-0.0235141	-0.0790087	0.193717	0.110546	-0.0814041	0.10296	0.077828	-0.0659898	0.103941	0.0742293	0.0742293	-0.102623	0.157202	-0.0112398	-0.0577684	0.0533505	-0.0578305	-0.0888452	-0.198955		0.00616922	0.100229	0.0218718
-14.8292	-0.0734971	-0.0149854	-0.0872862	0.184891	0.125557	-0.0968832	0.0981615	0.0777966	-0.0627174	0.116834	0.0904404	0.0904404	-0.0975405	0.145725	-0.0170224	-0.0436598	0.0455044	-0.060769	-0.0857887	-0.208767		0.00632166	0.102729	0.0224173
-14.7309	-0.0879641	-0.0106769	-0.0962032	0.173716	0.141183	-0.113822	0.100382	0.0819967	-0.0534781	0.127622	0.103125	0.103125	-0.0918168	0.135949	-0.0208736	-0.0295664	0.0415989	-0.0630875	-0.0845802	-0.217606		0.00695125	0.106033	0.0231384
-14.6326	-0.103054	-0.00474153	-0.104447	0.162602	0.153737	-0.128163	0.105917	0.0835347	-0.0426021	0.139202	0.109991	0.109991	-0.0906531	0.127142	-0.0298306	-0.0179126	0.0320493	-0.0634421	-0.0838681	-0.22079		0.00673301	0.108894	0.0237626
-14.5342	-0.119587	0.00117111	-0.111777	0.152569	0.166935	-0.144884	0.110188	0.0874524	-0.0346547	0.144959	0.120064	0.120064	-0.0864057	0.119425	-0.0404999	-0.00210488	0.0194431	-0.0662671	-0.0834922	-0.224986		0.00638055	0.112846	0.024625
-14.4359	-0.137647	0.00490993	-0.118954	0.137992	0.18274	-0.163328	0.11599	0.0862388	-0.0290717	0.148946	0.130745	0.130745	-0.0824047	0.116637	-0.0509873	0.0136081	0.015037	-0.0729675	-0.0867147	-0.231484		0.00550147	0.118231	0.0258001
-14.3376	-0.157966	0.00829689	-0.125123	0.118364	0.195484	-0.176517	0.120702	0.0867365	-0.0195776	0.152451	0.137457	0.137457	-0.0807657	0.118947	-0.0604586	0.0284514	0.0119631	-0.0708874	-0.0895657	-0.236521		0.00494637	0.122749	0.026786
-14.2393	-0.175653	0.00846825	-0.129758	0.0985708	0.207203	-0.187247	0.124598	0.0859685	-0.00244245	0.152069	0.140463	0.140463	-0.0807855	0.122143	-0.0686676	0.0408583	0.0110098	-0.0649072	-0.0891154	-0.243421		0.00449085	0.126478	0.0275998
-14.141	-0.190973	0.0038364	-0.135834	0.0764406	0.219013	-0.197909	0.128338	0.087578	0.0124244	0.14704	0.141928	0.141928	-0.077169	0.122321	-0.0779566	0.0560798	0.0100734	-0.0586323	-0.0853096	-0.251152		0.00360332	0.129979	0.0283637
-14.0427	-0.207756	-0.00406835	-0.145049	0.0543903	0.223457	-0.205328	0.134953	0.0880905	0.0235831	0.147129	0.144488	0.144488	-0.0766878	0.127811	-0.0878754	0.0692542	0.0110165	-0.0497105	-0.0847	-0.254563		0.0026462	0.133859	0.0292103
-13.9444	-0.220482	-0.0108755	-0.153951	0.0395641	0.226174	-0.214887	0.146398	0.0846179	0.0313652	0.145231	0.145855	0.145855	-0.0749346	0.132589	-0.0969227	0.0813528	0.0120079	-0.0392944	-0.0828438	-0.254343		0.00212383	0.137277	0.0299564
-13.8461	-0.229123	-0.0223278	-0.170356	0.0270588	0.231548	-0.225275	0.156202	0.0775227	0.0337899	0.143572	0.152522	0.152522	-0.0734116	0.136691	-0.103915	0.0911801	0.0142181	-0.0274323	-0.0805621	-0.256482		0.00139716	0.141806	0.0309445
-13.7478	-0.239574	-0.0304369	-0.187401	0.0187229	0.238441	-0.232427	0.164885	0.0690887	0.0406701	0.143608	0.162008	0.162008	-0.0715351	0.137033	-0.109089	0.100872	0.0184973	-0.0177122	-0.0795565	-0.251365		0.00183693	0.146197	0.0319028
-13.6495	-0.251348	-0.0418392	-0.202362	0.00998763	0.239907	-0.236262	0.175498	0.0642307	0.0445445	0.136352	0.169302	0.169302	-0.0685417	0.134089	-0.115464	0.109178	0.0214111	-0.00396845	-0.0768285	-0.243242		0.00169738	0.149264	0.0325721
-13.5512	-0.260521	-0.0557659	-0.214063	0.000587956	0.232674	-0.242538	0.182268	0.0582167	0.0487309	0.12682	0.174243	0.174243	-0.0668946	0.127655	-0.120641	0.117484	0.0221092	0.00742515	-0.0803315	-0.232875		-5.86186e-05	0.150982	0.032947
-13.4529	-0.269453	-0.0654596	-0.226015	-0.00535142	0.224496	-0.245432	0.190575	0.0503146	0.0504876	0.113272	0.183036	0.183036	-0.064019	0.124339	-0.124314	0.127177	0.0258478	0.0160305	-0.0820116	-0.216512		-0.000497798	0.152575	0.0332945
-13.3546	-0.277368	-0.0729444	-0.236903	-0.00422666	0.216986	-0.24763	0.198793	0.0401434	0.0508666	0.0969183	0.193496	0.193496	-0.0586169	0.121829	-0.125493	0.136461	0.0313106	0.027862	-0.0843935	-0.202401		-9.06555e-05	0.15448	0.0337104
-13.2563	-0.283423	-0.0794742	-0.241867	-0.00368002	0.206695	-0.239304	0.204223	0.0327793	0.052382	0.0774558	0.206398	0.206398	-0.0548765	0.120756	-0.121808	0.144789	0.0303855	0.0418328	-0.0847111	-0.180266		0.00173429	0.154524	0.0337198
-13.158	-0.285241	-0.0823182	-0.250178	-0.00445286	0.194426	-0.223142	0.213453	0.0297234	0.0536047	0.0542492	0.213855	0.213855	-0.0480114	0.119116	-0.119438	0.157486	0.0262529	0.053114	-0.0861405	-0.157759		0.00362278	0.153816	0.0335654
-13.0597	-0.288752	-0.0840317	-0.25774	0.000139472	0.183484	-0.212574	0.217386	0.0300394	0.0468227	0.0311106	0.220509	0.220509	-0.0439692	0.113649	-0.115827	0.167404	0.0239382	0.0621368	-0.0870126	-0.137116		0.00450528	0.153457	0.0334871
-12.9614	-0.289515	-0.0834321	-0.258695	0.00664758	0.17477	-0.201223	0.224955	0.0352659	0.0365721	0.00758185	0.222873	0.222873	-0.0464861	0.110651	-0.112055	0.17597	0.0231071	0.0700554	-0.081433	-0.115896		0.00612937	0.152324	0.0332398
-12.8631	-0.285195	-0.0814838	-0.262799	0.0144576	0.161059	-0.186523	0.236522	0.0393681	0.024472	-0.0226616	0.224144	0.224144	-0.0554846	0.105882	-0.107502	0.182847	0.0141051	0.0834724	-0.0724103	-0.0906208		0.00728971	0.150981	0.0329467
-12.7648	-0.276896	-0.0799684	-0.263234	0.0189098	0.14806	-0.171574	0.249574	0.0419324	0.0113689	-0.0486441	0.224013	0.224013	-0.0679765	0.103161	-0.103236	0.189557	0.00980107	0.101289	-0.0662974	-0.0664243		0.00887134	0.15007	0.032748
-12.6665	-0.267146	-0.0748112	-0.260938	0.0208244	0.138964	-0.154435	0.257548	0.0381612	-0.00846454	-0.0690737	0.224689	0.224689	-0.0805127	0.097575	-0.101506	0.196599	0.00458249	0.118771	-0.0587182	-0.045082		0.0100858	0.149127	0.0325422
-12.5682	-0.259252	-0.072813	-0.258996	0.0210101	0.132588	-0.139512	0.264702	0.0368905	-0.0284689	-0.0921993	0.224739	0.224739	-0.089623	0.089581	-0.0954174	0.205615	0.00239123	0.133732	-0.0495013	-0.0273025		0.0111451	0.149143	0.0325456
-12.4699	-0.248326	-0.0717484	-0.254648	0.0190499	0.12449	-0.123025	0.26864	0.0340778	-0.0447258	-0.110086	0.218574	0.218574	-0.103193	0.0820642	-0.0879647	0.214464	0.00151189	0.147749	-0.0420091	-0.00446624		0.0119501	0.147907	0.0322759
-12.3716	-0.230843	-0.0702317	-0.251404	0.0210633	0.114822	-0.105122	0.269593	0.0346695	-0.0600368	-0.124282	0.206749	0.206749	-0.120966	0.0707715	-0.0806676	0.224588	-0.00287499	0.161207	-0.0311366	0.0189593		0.0125803	0.145821	0.0318207
-12.2733	-0.208884	-0.0649928	-0.246167	0.0227692	0.104278	-0.0890187	0.270949	0.0362535	-0.0858635	-0.133303	0.197095	0.197095	-0.132266	0.0554351	-0.0765509	0.233233	-0.00299918	0.166355	-0.0185947	0.0397695		0.0132296	0.143574	0.0313304
-12.175	-0.188829	-0.0574246	-0.239753	0.0212705	0.0941455	-0.0710374	0.274245	0.0389404	-0.117023	-0.141865	0.187865	0.187865	-0.138128	0.0404707	-0.0766773	0.24181	-0.0053931	0.168911	-0.00870786	0.0640313		0.0137358	0.142471	0.0310898
-12.0766	-0.170409	-0.0464151	-0.232281	0.0187537	0.0815661	-0.0553181	0.276799	0.0358065	-0.143234	-0.147823	0.180523	0.180523	-0.145087	0.0298931	-0.0778643	0.247363	-0.0142315	0.171653	0.00015197	0.0898494		0.014011	0.142068	0.0310018
-11.9783	-0.15111	-0.0341222	-0.22159	0.0192717	0.074505	-0.0420828	0.27684	0.0327923	-0.164411	-0.15288	0.16903	0.16903	-0.151521	0.0199131	-0.0795935	0.250859	-0.023703	0.175247	0.0116481	0.113293		0.0145707	0.141187	0.0308095
-11.88	-0.135741	-0.022646	-0.210805	0.0164588	0.0650567	-0.031549	0.275377	0.0326864	-0.184059	-0.153258	0.159347	0.159347	-0.154953	0.013941	-0.0832539	0.251023	-0.0313219	0.177412	0.0222635	0.134209		0.0149768	0.140455	0.0306498
-11.7817	-0.122298	-0.00550757	-0.195977	0.011287	0.0488055	-0.0249087	0.270604	0.0358226	-0.196734	-0.149046	0.147445	0.147445	-0.15564	0.00928419	-0.0899969	0.248488	-0.0450269	0.177581	0.0306652	0.158861		0.0150576	0.138707	0.0302684
-11.6834	-0.105861	0.0113137	-0.180012	0.00511259	0.0310825	-0.0182143	0.261085	0.0393512	-0.211825	-0.147734	0.132333	0.132333	-0.157246	0.0101512	-0.10022	0.247337	-0.0629001	0.177482	0.038414	0.178254		0.0140119	0.137354	0.0299732
-11.5851	-0.0861548	0.0305453	-0.164087	0.00133707	0.0153857	-0.0169313	0.249752	0.040099	-0.226704	-0.142345	0.117371	0.117371	-0.158162	0.0172262	-0.109558	0.247516	-0.0816383	0.17747	0.0442126	0.193391		0.0133048	0.1363	0.029743
-11.4868	-0.0718836	0.0526816	-0.147038	-0.00337223	0.00518539	-0.0165417	0.240527	0.0407638	-0.240165	-0.13395	0.107849	0.107849	-0.160117	0.0258529	-0.120806	0.24871	-0.101193	0.176552	0.0578487	0.20445		0.0136602	0.136721	0.0298351
-11.3885	-0.0573725	0.0713141	-0.130999	-0.00756022	-0.0076909	-0.0161206	0.232655	0.0387578	-0.24998	-0.118685	0.093533	0.093533	-0.166542	0.0294188	-0.131102	0.248594	-0.124583	0.172886	0.0681586	0.209329		0.0123771	0.136751	0.0298415
-11.2902	-0.0426718	0.0854232	-0.116058	-0.0172024	-0.0198657	-0.0151455	0.225087	0.0382979	-0.259265	-0.0964463	0.0766272	0.0766272	-0.175147	0.0301555	-0.141974	0.247415	-0.145363	0.164146	0.074617	0.211313		0.0100285	0.136591	0.0298066
-11.1919	-0.0319241	0.0961488	-0.104501	-0.0271832	-0.0280127	-0.0234825	0.215901	0.0352725	-0.268414	-0.0750464	0.05857	0.05857	-0.18181	0.0305356	-0.157706	0.245123	-0.157297	0.154568	0.0828376	0.206077		0.00641136	0.136334	0.0297506
-11.0936	-0.0244364	0.105271	-0.0934636	-0.0372759	-0.0374115	-0.0363228	0.204291	0.0258963	-0.2799	-0.0547026	0.0388223	0.0388223	-0.193214	0.0291547	-0.173032	0.237105	-0.163824	0.148632	0.0883666	0.202681		0.0012729	0.136639	0.0298171
-10.9953	-0.0148587	0.113238	-0.0807259	-0.0511999	-0.0483319	-0.0471159	0.196717	0.0142876	-0.291053	-0.0311638	0.0212343	0.0212343	-0.202618	0.0274021	-0.188336	0.229817	-0.168402	0.140621	0.0912724	0.201748		-0.00331172	0.137707	0.0300501
-10.897	-0.0103208	0.116804	-0.0679571	-0.067475	-0.0600775	-0.0617201	0.183134	-0.00119585	-0.298637	-0.0065027	0.00764617	0.00764617	-0.203514	0.0233107	-0.203098	0.224456	-0.174572	0.135041	0.0899963	0.197996		-0.00845198	0.138094	0.0301345
-10.7987	-0.00758279	0.116804	-0.0517479	-0.0842326	-0.0691064	-0.0806881	0.166756	-0.0145047	-0.301547	0.0251043	-0.00679942	-0.00679942	-0.198961	0.0173848	-0.215	0.218644	-0.176147	0.129323	0.0851524	0.187538		-0.0133205	0.136926	0.0298797
-10.7004	-0.00820975	0.114946	-0.0382723	-0.0970714	-0.0782392	-0.0984125	0.148218	-0.0269654	-0.302069	0.0488533	-0.0226286	-0.0226286	-0.193905	0.00826614	-0.224669	0.209593	-0.179317	0.117441	0.0797079	0.183043		-0.019116	0.135627	0.0295963
-10.6021	-0.0129717	0.11061	-0.026495	-0.108506	-0.0919374	-0.115785	0.128529	-0.0352294	-0.301469	0.0677113	-0.0417462	-0.0417462	-0.188574	0.000150371	-0.231556	0.202189	-0.182021	0.103415	0.0702537	0.18158		-0.0256799	0.134546	0.0293604
-10.5038	-0.0170286	0.109672	-0.0149739	-0.118524	-0.107027	-0.133512	0.103618	-0.0391299	-0.301464	0.0911659	-0.0545842	-0.0545842	-0.181588	-0.00519651	-0.241488	0.192514	-0.179227	0.0919642	0.0582969	0.183533		-0.0308781	0.134213	0.0292876
-10.4055	-0.022331	0.109419	-0.00714051	-0.126402	-0.122333	-0.152087	0.0818792	-0.046597	-0.301402	0.109731	-0.0642644	-0.0642644	-0.171564	-0.0138196	-0.251202	0.180429	-0.176247	0.0825454	0.0489987	0.181355		-0.0362648	0.133933	0.0292266
-10.3072	-0.0295828	0.103364	0.00279932	-0.132634	-0.137356	-0.169775	0.0639856	-0.0542625	-0.301448	0.124636	-0.0695524	-0.0695524	-0.154357	-0.020523	-0.259397	0.16603	-0.174516	0.0757931	0.032285	0.178162		-0.041295	0.133031	0.0290298
-10.2089	-0.0372307	0.0917897	0.0126174	-0.138694	-0.149818	-0.186899	0.0447654	-0.0614094	-0.292118	0.135292	-0.076038	-0.076038	-0.144412	-0.0264794	-0.264947	0.15489	-0.176358	0.0745516	0.0123527	0.177689		-0.0463247	0.132055	0.0288167
-10.1106	-0.0424182	0.0810181	0.0199517	-0.141537	-0.163719	-0.206952	0.0257509	-0.0704248	-0.27942	0.144333	-0.0811611	-0.0811611	-0.137369	-0.0337643	-0.264371	0.140022	-0.17443	0.0758151	-0.00393722	0.173433		-0.051017	0.130356	0.028446
-10.0123	-0.0455177	0.0713198	0.0280137	-0.138975	-0.174595	-0.225978	0.00661448	-0.0729148	-0.272205	0.157287	-0.0860655	-0.0860655	-0.131337	-0.0432162	-0.258887	0.122129	-0.16921	0.0774675	-0.0193054	0.165172		-0.0548134	0.12866	0.0280759
-9.91396	-0.0476234	0.0611993	0.0332395	-0.138073	-0.18575	-0.24332	-0.00887669	-0.0781028	-0.262434	0.167561	-0.0886732	-0.0886732	-0.12182	-0.0584249	-0.251483	0.108335	-0.162647	0.0752247	-0.0331669	0.157628		-0.0582941	0.1269	0.0276919
-9.81565	-0.0474333	0.051416	0.0367673	-0.134832	-0.193847	-0.257736	-0.025497	-0.0836389	-0.247984	0.171879	-0.0946603	-0.0946603	-0.115296	-0.0754787	-0.244331	0.0998277	-0.160482	0.0746759	-0.0481978	0.148392		-0.0620559	0.124969	0.0272704
-9.71735	-0.048766	0.0395117	0.0429986	-0.130576	-0.197625	-0.26907	-0.0384745	-0.0912829	-0.23883	0.170528	-0.104094	-0.104094	-0.114011	-0.0951883	-0.236992	0.0933806	-0.153945	0.0793701	-0.0633959	0.14033		-0.0660113	0.123572	0.0269656
-9.61905	-0.0509613	0.0255359	0.0498174	-0.130631	-0.202254	-0.277439	-0.042535	-0.0960622	-0.228369	0.171567	-0.110972	-0.110972	-0.111971	-0.117271	-0.227027	0.0845969	-0.143525	0.0861576	-0.075639	0.13543		-0.0686262	0.12264	0.0267622
-9.52074	-0.0553082	0.00771113	0.0578278	-0.129547	-0.207091	-0.276748	-0.0414316	-0.0973548	-0.216533	0.17238	-0.114073	-0.114073	-0.107015	-0.138929	-0.213922	0.0731601	-0.129714	0.0920758	-0.088816	0.129615		-0.0698893	0.120564	0.0263092
-9.42244	-0.0537767	-0.0122898	0.0649703	-0.123845	-0.210989	-0.270843	-0.0434823	-0.0976548	-0.202721	0.16883	-0.119099	-0.119099	-0.100703	-0.154669	-0.19857	0.0584385	-0.115095	0.0996435	-0.104503	0.127708		-0.0703875	0.117919	0.025732
-9.32413	-0.0539419	-0.0348063	0.0736338	-0.118126	-0.208776	-0.266963	-0.0456214	-0.0930526	-0.189371	0.158701	-0.121386	-0.121386	-0.0902502	-0.162803	-0.18558	0.044439	-0.10107	0.110793	-0.117536	0.131641		-0.0695731	0.11565	0.025237
-9.22583	-0.0572381	-0.0530838	0.0853588	-0.107975	-0.206822	-0.259622	-0.0463257	-0.0844315	-0.17802	0.143539	-0.122136	-0.122136	-0.0747931	-0.17274	-0.172151	0.0307667	-0.0890832	0.125378	-0.131237	0.138137		-0.0677307	0.114203	0.0249212
-9.12753	-0.0580107	-0.0691111	0.101496	-0.0985538	-0.201231	-0.245004	-0.0467832	-0.0769972	-0.165335	0.127085	-0.124383	-0.124383	-0.0564311	-0.184528	-0.15642	0.0191028	-0.0824199	0.139319	-0.14688	0.146812		-0.0651328	0.113528	0.0247739
-9.02922	-0.0571353	-0.0866699	0.117528	-0.0895782	-0.191571	-0.231798	-0.0473481	-0.0670366	-0.148957	0.109152	-0.123075	-0.123075	-0.0343846	-0.193394	-0.138374	0.00935208	-0.0799341	0.153387	-0.15851	0.15473		-0.0613346	0.11308	0.024676
-8.93092	-0.0570932	-0.101125	0.129585	-0.0764925	-0.183666	-0.218416	-0.0497514	-0.0563598	-0.127713	0.0861878	-0.123155	-0.123155	-0.014274	-0.199832	-0.119655	0.000483053	-0.075383	0.171625	-0.165425	0.159839		-0.0571888	0.11278	0.0246106
-8.83261	-0.0533712	-0.113104	0.139626	-0.0614775	-0.170588	-0.202449	-0.0517303	-0.045718	-0.106472	0.0641067	-0.125497	-0.125497	-0.000536899	-0.206937	-0.102419	-0.0092152	-0.0709562	0.185727	-0.171221	0.165697		-0.0531016	0.112698	0.0245927
-8.73431	-0.0514365	-0.12169	0.14554	-0.0459365	-0.157226	-0.186479	-0.0534009	-0.0303996	-0.0900741	0.0419943	-0.124858	-0.124858	0.0120353	-0.211175	-0.086589	-0.0189879	-0.0652974	0.194964	-0.17418	0.175409		-0.0486323	0.112639	0.0245798
-8.63601	-0.0505628	-0.124336	0.154493	-0.0352532	-0.145315	-0.172301	-0.054176	-0.018311	-0.0776326	0.0238993	-0.125516	-0.125516	0.0260247	-0.212856	-0.0736902	-0.025852	-0.0619571	0.207554	-0.175362	0.181593		-0.0442536	0.113769	0.0248265
-8.5377	-0.0449213	-0.127629	0.159325	-0.024602	-0.128939	-0.16028	-0.0517048	-0.00882614	-0.0630503	0.00438094	-0.12404	-0.12404	0.0391681	-0.21245	-0.0653792	-0.0373293	-0.0586887	0.225159	-0.172577	0.186246		-0.0395088	0.11486	0.0250646
-8.4394	-0.0353816	-0.129591	0.163047	-0.0136585	-0.112414	-0.149255	-0.0428481	-0.00138921	-0.0463253	-0.0148552	-0.127938	-0.127938	0.0486029	-0.211523	-0.0571263	-0.0477228	-0.0589313	0.239987	-0.16564	0.18841		-0.0351245	0.115897	0.0252908
-8.34109	-0.0240431	-0.128128	0.166522	-0.00501159	-0.0949197	-0.137111	-0.0345242	0.0111328	-0.0346278	-0.0310282	-0.130402	-0.130402	0.0593163	-0.207907	-0.0501945	-0.0571785	-0.060387	0.255635	-0.16086	0.193909		-0.0300105	0.117694	0.0256829
-8.24279	-0.0123714	-0.120857	0.167079	0.00259583	-0.0800241	-0.125976	-0.0301057	0.0230509	-0.0197244	-0.0481988	-0.132065	-0.132065	0.0677178	-0.205676	-0.0469349	-0.0644938	-0.0594861	0.268662	-0.147354	0.200415		-0.0247906	0.118858	0.0259369
-8.14449	-0.00253863	-0.108348	0.165133	0.0143795	-0.0661401	-0.115941	-0.0245473	0.0327839	-0.00437157	-0.0650347	-0.134964	-0.134964	0.0798873	-0.201549	-0.0442265	-0.075666	-0.0596775	0.279515	-0.128882	0.206211		-0.019447	0.119862	0.0261561
-8.04618	0.00497376	-0.0975145	0.167029	0.0234646	-0.0503041	-0.102488	-0.0205718	0.047477	0.0101128	-0.0783754	-0.137932	-0.137932	0.0948269	-0.192324	-0.0439716	-0.0825491	-0.0633754	0.288799	-0.112259	0.212083		-0.0135416	0.121255	0.0264599
-7.94788	0.00983635	-0.0911518	0.16493	0.028519	-0.0364678	-0.0881319	-0.0199674	0.056266	0.0277154	-0.0944271	-0.137398	-0.137398	0.108475	-0.182816	-0.0490168	-0.0857653	-0.0620602	0.297198	-0.0974422	0.221081		-0.00840105	0.122599	0.0267532
-7.84957	0.011727	-0.0853796	0.164112	0.0312139	-0.0215128	-0.0755255	-0.0226882	0.0646835	0.0435264	-0.114292	-0.137688	-0.137688	0.11811	-0.167136	-0.0557185	-0.0921784	-0.0635269	0.306013	-0.0830371	0.229899		-0.00435438	0.12442	0.0271507
-7.75127	0.0113637	-0.0803216	0.164497	0.0287551	-0.0111879	-0.0602936	-0.024321	0.0732057	0.0576791	-0.1262	-0.134792	-0.134792	0.126828	-0.152686	-0.0590513	-0.100099	-0.0634417	0.31109	-0.0650936	0.245226		0.000318188	0.126065	0.0275096
-7.65297	0.0160372	-0.0741922	0.161031	0.0278655	8.11835e-05	-0.0455272	-0.0291795	0.0828808	0.0751366	-0.132681	-0.128129	-0.128129	0.138255	-0.138218	-0.0623692	-0.105417	-0.0611671	0.312265	-0.0453268	0.257526		0.00603715	0.126583	0.0276226
-7.55466	0.0202593	-0.0681673	0.157323	0.0313431	0.0146834	-0.0382735	-0.0399135	0.0903434	0.0889371	-0.142037	-0.124929	-0.124929	0.148544	-0.123083	-0.0665617	-0.109512	-0.0581551	0.309533	-0.0278964	0.270318		0.0103913	0.12768	0.0278621
-7.45636	0.0239548	-0.0587143	0.150394	0.0318261	0.0278677	-0.0379435	-0.058073	0.0968193	0.0999575	-0.152896	-0.124288	-0.124288	0.153944	-0.112304	-0.0740119	-0.11069	-0.0587958	0.306556	-0.00466801	0.286383		0.0130514	0.129804	0.0283256
-7.35805	0.0224768	-0.0479595	0.143722	0.0291886	0.0404497	-0.0452638	-0.0733014	0.101776	0.106805	-0.161195	-0.121765	-0.121765	0.157724	-0.111678	-0.0837832	-0.10871	-0.0581601	0.300583	0.0185063	0.30015		0.01439	0.131716	0.0287429
-7.25975	0.0213387	-0.0341266	0.13573	0.0257459	0.0479822	-0.0536387	-0.0907077	0.103283	0.109427	-0.164835	-0.117857	-0.117857	0.159568	-0.118138	-0.0923792	-0.108965	-0.0569102	0.294383	0.0407815	0.309273		0.0146049	0.133131	0.0290516
-7.16145	0.0246493	-0.0206992	0.124307	0.0193935	0.0544874	-0.0656999	-0.111916	0.100432	0.110482	-0.169925	-0.116616	-0.116616	0.157737	-0.12125	-0.103231	-0.110456	-0.0573212	0.286904	0.0664471	0.319578		0.0135345	0.13527	0.0295184
-7.06314	0.0293646	-0.0073533	0.109236	0.0156908	0.0548082	-0.0781408	-0.128494	0.097713	0.107734	-0.172659	-0.115509	-0.115509	0.150564	-0.124409	-0.10996	-0.113082	-0.0542729	0.280291	0.0910113	0.330971		0.0123997	0.137049	0.0299066
-6.96484	0.0312988	0.009563	0.0958656	0.015407	0.0505556	-0.0887151	-0.142679	0.0987339	0.101527	-0.170198	-0.113005	-0.113005	0.140857	-0.129903	-0.118712	-0.114677	-0.0457648	0.269819	0.115261	0.338663		0.0115446	0.137843	0.0300798
-6.86653	0.0332798	0.0217427	0.0821838	0.010974	0.0484527	-0.0990295	-0.154029	0.101509	0.0916306	-0.162657	-0.11186	-0.11186	0.132779	-0.136031	-0.127786	-0.118091	-0.0406832	0.256865	0.137618	0.350349		0.0102678	0.139308	0.0303996
-6.76823	0.0357316	0.0327988	0.0665397	0.00845324	0.0421644	-0.105948	-0.158637	0.106177	0.0766559	-0.158702	-0.109351	-0.109351	0.130127	-0.140296	-0.13493	-0.121209	-0.03426	0.246537	0.160606	0.365034		0.00990701	0.14139	0.0308537
-6.66993	0.0385738	0.0435204	0.0527376	0.00530679	0.0373059	-0.109886	-0.160888	0.105936	0.064192	-0.159548	-0.110165	-0.110165	0.124178	-0.145283	-0.141612	-0.122624	-0.0300409	0.239035	0.183275	0.37819		0.00910196	0.144089	0.0314428
-6.57162	0.0467734	0.0510934	0.036013	0.00492338	0.0370278	-0.11134	-0.161841	0.111363	0.0544653	-0.161274	-0.110691	-0.110691	0.116243	-0.15395	-0.144098	-0.12567	-0.021369	0.231637	0.204028	0.390859		0.00917498	0.147064	0.0320921
-6.47332	0.0535801	0.0605992	0.0279182	0.0062135	0.0315123	-0.111615	-0.163049	0.117681	0.043892	-0.158567	-0.109371	-0.109371	0.109097	-0.168682	-0.141563	-0.123459	-0.0129012	0.217224	0.224155	0.401864		0.00975802	0.149175	0.0325528
-6.37501	0.0551229	0.0643693	0.0231575	0.00832388	0.0253454	-0.109056	-0.168287	0.120826	0.0294982	-0.160647	-0.108121	-0.108121	0.102998	-0.187839	-0.136314	-0.120891	-0.00601342	0.20407	0.242955	0.412398		0.00918862	0.151901	0.0331476
-6.27671	0.0525065	0.0578146	0.0210035	0.0110198	0.020565	-0.106138	-0.174869	0.123811	0.0210835	-0.16538	-0.108897	-0.108897	0.096039	-0.204869	-0.128695	-0.117829	0.00218284	0.188913	0.261399	0.418456		0.00796101	0.154154	0.0336392
-6.17841	0.0475864	0.0502053	0.0208812	0.0107848	0.0244843	-0.101187	-0.180834	0.127043	0.00899951	-0.164462	-0.112254	-0.112254	0.0879888	-0.219107	-0.117667	-0.117337	0.0105555	0.175619	0.274041	0.420095		0.00665904	0.155299	0.033889
-6.0801	0.0419631	0.0408096	0.0226686	0.00773339	0.0317392	-0.0962366	-0.187756	0.129072	-0.008126	-0.161484	-0.112969	-0.112969	0.0775026	-0.232794	-0.107788	-0.115199	0.0221876	0.161171	0.282652	0.418834		0.00505061	0.155597	0.033954
-5.9818	0.0368516	0.0296981	0.0220619	0.0134631	0.0363898	-0.08922	-0.193141	0.127414	-0.0243141	-0.159214	-0.115047	-0.115047	0.0642643	-0.24999	-0.0981204	-0.113744	0.0346223	0.14354	0.291128	0.422538		0.00320669	0.156879	0.0342339
-5.88349	0.0326599	0.0209389	0.0249339	0.0231526	0.0437169	-0.0793179	-0.193683	0.131219	-0.0423409	-0.157227	-0.124845	-0.124845	0.0541582	-0.264599	-0.0850597	-0.113075	0.0409165	0.123495	0.298467	0.4249		0.0016783	0.158547	0.0345977
-5.78519	0.0317098	0.0118418	0.0294161	0.0364798	0.0494827	-0.0685624	-0.195198	0.140957	-0.0627466	-0.148382	-0.131248	-0.131248	0.0465796	-0.281935	-0.0711523	-0.109631	0.0471893	0.105375	0.303323	0.426533		0.00143916	0.160442	0.0350113
-5.68689	0.0319272	0.00232982	0.0316872	0.0558766	0.058436	-0.0602487	-0.198139	0.153324	-0.0887585	-0.143961	-0.134437	-0.134437	0.04014	-0.298801	-0.0598691	-0.107741	0.0555169	0.0874282	0.299951	0.420152		0.000518824	0.161712	0.0352885
-5.58858	0.0272953	-0.00730881	0.0353704	0.074933	0.0663501	-0.0505782	-0.198787	0.164119	-0.1152	-0.143113	-0.137912	-0.137912	0.0336969	-0.312458	-0.0451507	-0.110175	0.0585042	0.0672795	0.292997	0.414601		-0.00117241	0.163014	0.0355727
-5.49028	0.0232702	-0.012966	0.0378957	0.0900425	0.073916	-0.0369683	-0.199022	0.172757	-0.140373	-0.137723	-0.135577	-0.135577	0.0315526	-0.325459	-0.0293767	-0.113802	0.0584832	0.0479338	0.282865	0.405885		-0.00211221	0.163262	0.0356267
-5.39197	0.0206649	-0.0197259	0.0435673	0.107647	0.083395	-0.0209814	-0.194189	0.181123	-0.161196	-0.130022	-0.13406	-0.13406	0.0332466	-0.33642	-0.0136759	-0.119264	0.0616363	0.0300867	0.264471	0.395201		-0.00212772	0.162862	0.0355395
-5.29367	0.0219915	-0.0273217	0.0458006	0.127844	0.0903754	0.00214128	-0.189176	0.189273	-0.178982	-0.123436	-0.13525	-0.13525	0.0371424	-0.340093	0.00628595	-0.124776	0.0640535	0.0147162	0.244489	0.386078		-0.00120473	0.162648	0.0354926
-5.19537	0.0262221	-0.035299	0.0487813	0.148568	0.0954937	0.0299834	-0.182317	0.19834	-0.188292	-0.117941	-0.136763	-0.136763	0.0401605	-0.337385	0.029049	-0.127932	0.0666756	-0.00260593	0.225523	0.376218		0.000985801	0.162055	0.0353634
-5.09706	0.0277777	-0.0413407	0.0558694	0.170892	0.0992433	0.0566851	-0.172432	0.208786	-0.193307	-0.106193	-0.137467	-0.137467	0.0396181	-0.333007	0.0545442	-0.129129	0.0731985	-0.0170735	0.205422	0.360904		0.00427609	0.160854	0.0351012
-4.99876	0.0270791	-0.0451771	0.0634443	0.18924	0.101783	0.0819899	-0.166765	0.220114	-0.197517	-0.0949291	-0.135509	-0.135509	0.0452426	-0.326364	0.0745751	-0.12972	0.0745532	-0.0328269	0.187012	0.342023		0.00713702	0.159566	0.0348201
-4.90045	0.0275556	-0.0541247	0.0703154	0.20552	0.107341	0.106589	-0.162554	0.225515	-0.19672	-0.084818	-0.135237	-0.135237	0.0508526	-0.318451	0.0932319	-0.128849	0.068892	-0.0466953	0.164044	0.328629		0.00928996	0.158573	0.0346034
-4.80215	0.0294392	-0.0607402	0.0824351	0.223239	0.112531	0.131237	-0.159651	0.230101	-0.193274	-0.0801304	-0.133444	-0.133444	0.0577172	-0.312099	0.11019	-0.124352	0.0633051	-0.0605098	0.137355	0.311596		0.0115751	0.157827	0.0344407
-4.70385	0.0296724	-0.0659579	0.0979176	0.238624	0.114415	0.15067	-0.161207	0.233015	-0.184939	-0.0718064	-0.130513	-0.130513	0.0634489	-0.307792	0.126642	-0.118687	0.0590595	-0.0746815	0.109828	0.289057		0.0133127	0.15673	0.0342013
-4.60554	0.0325992	-0.0692171	0.113685	0.255378	0.114342	0.168695	-0.167693	0.235403	-0.176917	-0.0574695	-0.123516	-0.123516	0.0705553	-0.301289	0.142152	-0.114482	0.0557192	-0.0882779	0.0833103	0.265001		0.015723	0.155943	0.0340295
-4.50724	0.0312845	-0.0722516	0.129343	0.270094	0.111338	0.184587	-0.17601	0.232862	-0.172477	-0.0432976	-0.112872	-0.112872	0.0770273	-0.288332	0.154239	-0.107675	0.0484337	-0.104657	0.0593097	0.242509		0.0175292	0.154691	0.0337565
-4.40893	0.0285525	-0.0719934	0.135986	0.28396	0.111019	0.200158	-0.186953	0.231297	-0.167904	-0.0315043	-0.104653	-0.104653	0.0797047	-0.268044	0.164057	-0.103108	0.0408792	-0.117455	0.0336472	0.219447		0.0186221	0.153398	0.0334741
-4.31063	0.0273072	-0.0695523	0.137763	0.297226	0.110628	0.212658	-0.196873	0.232529	-0.158046	-0.0148978	-0.0927095	-0.0927095	0.0842815	-0.240105	0.176697	-0.0988064	0.0346911	-0.130324	0.00670272	0.194754		0.0210607	0.151429	0.0330445
-4.21233	0.029412	-0.0592185	0.135537	0.309414	0.106585	0.225655	-0.203483	0.231413	-0.150215	0.00572593	-0.0788996	-0.0788996	0.0887222	-0.214097	0.189953	-0.0952104	0.0276362	-0.146052	-0.0175096	0.174096		0.0240283	0.150131	0.0327612
-4.11402	0.03538	-0.048416	0.130562	0.323633	0.0923041	0.235346	-0.204116	0.230304	-0.142124	0.0228644	-0.0635959	-0.0635959	0.0920223	-0.191027	0.202137	-0.0877537	0.0159612	-0.165068	-0.0418606	0.15628		0.0264618	0.149331	0.0325867
-4.01572	0.041475	-0.0399171	0.124223	0.334145	0.0757481	0.244882	-0.201663	0.23046	-0.131576	0.0378304	-0.0470577	-0.0470577	0.0987942	-0.169341	0.216058	-0.0809975	0.00104582	-0.182765	-0.0656347	0.137167		0.0287909	0.149111	0.0325387
-3.91741	0.0471896	-0.0279631	0.1219	0.330758	0.0629989	0.245355	-0.200426	0.22902	-0.12024	0.0503035	-0.0294294	-0.0294294	0.105933	-0.146888	0.228987	-0.074708	-0.011386	-0.195039	-0.0878489	0.111336		0.0305212	0.147181	0.0321175
-3.81911	0.0520455	-0.0167884	0.116719	0.322959	0.0502091	0.24076	-0.200958	0.221921	-0.104574	0.0597155	-0.00683059	-0.00683059	0.111771	-0.128444	0.240121	-0.065789	-0.0206105	-0.20195	-0.106156	0.0864701		0.032188	0.144194	0.0314658
-3.72081	0.0550252	-0.00514475	0.108097	0.310139	0.0408734	0.234019	-0.199147	0.209174	-0.0859354	0.0697953	0.0127458	0.0127458	0.115453	-0.109305	0.251677	-0.0592711	-0.0278845	-0.208465	-0.125363	0.0617327		0.033048	0.140962	0.0307604
-3.6225	0.0575191	0.00952564	0.103323	0.29269	0.0318512	0.226964	-0.195109	0.192311	-0.0650276	0.0808629	0.0281802	0.0281802	0.118794	-0.0898683	0.262152	-0.0524174	-0.0372142	-0.208762	-0.136352	0.0382351		0.0342919	0.136901	0.0298742
-3.5242	0.0624648	0.0216662	0.0958929	0.272763	0.0249638	0.221972	-0.190473	0.177329	-0.046895	0.088935	0.0421263	0.0421263	0.123544	-0.073638	0.271	-0.0418975	-0.0409136	-0.203505	-0.141092	0.0153034		0.0360836	0.132724	0.0289628
-3.42589	0.0678532	0.0287549	0.085957	0.258913	0.0149231	0.218988	-0.181286	0.164001	-0.0253466	0.0940198	0.0486794	0.0486794	0.123738	-0.0571152	0.278589	-0.0275786	-0.0405781	-0.200366	-0.141091	-0.00678689		0.0376473	0.128911	0.0281307
-3.32759	0.0763073	0.0374126	0.071021	0.240065	0.00414651	0.213139	-0.174631	0.151101	-0.00404662	0.0992596	0.0566704	0.0566704	0.120608	-0.0403727	0.286917	-0.0134698	-0.0403691	-0.197562	-0.135627	-0.0303127		0.0388464	0.125187	0.027318
-3.22929	0.0842028	0.0451851	0.0604083	0.216603	-0.0068906	0.206749	-0.168988	0.135114	0.0121486	0.103992	0.0650753	0.0650753	0.116007	-0.0275651	0.288991	-0.00141999	-0.0428124	-0.195751	-0.126999	-0.058468		0.0385329	0.121753	0.0265686
-3.13098	0.0892601	0.0497049	0.0508854	0.190464	-0.0146679	0.198156	-0.163992	0.115604	0.0223207	0.107728	0.0729691	0.0729691	0.108271	-0.0176341	0.285461	0.00935784	-0.0428026	-0.194023	-0.120516	-0.0832466		0.0368134	0.118159	0.0257844
-3.03268	0.0965339	0.0502539	0.0383908	0.159164	-0.0163129	0.191384	-0.158301	0.0973162	0.0329383	0.106757	0.0830164	0.0830164	0.105821	-0.0088181	0.280509	0.0194465	-0.0456541	-0.195994	-0.111854	-0.103852		0.0351881	0.115263	0.0251524
-2.93437	0.10286	0.0483734	0.0267974	0.12809	-0.0140462	0.183753	-0.151403	0.0783587	0.0448873	0.106791	0.0911446	0.0911446	0.0978379	-0.000343571	0.275935	0.0295408	-0.0449807	-0.196174	-0.10174	-0.122824		0.0337001	0.112454	0.0245396
-2.83607	0.109732	0.0477747	0.0143725	0.0942258	-0.00880732	0.17856	-0.145007	0.0610873	0.0545343	0.103677	0.100547	0.100547	0.0915948	0.0116114	0.273625	0.0352212	-0.0415339	-0.193336	-0.0895517	-0.144037		0.0327419	0.11071	0.024159
-2.73777	0.113054	0.0483994	-0.000435235	0.0604375	-0.00224657	0.175953	-0.137162	0.0409636	0.0655045	0.102319	0.109221	0.109221	0.0813049	0.0268706	0.27421	0.0382221	-0.0388411	-0.188918	-0.0748517	-0.161076		0.0321074	0.109764	0.0239525
-2.63946	0.115267	0.048724	-0.0179675	0.0303486	0.0085991	0.174907	-0.13107	0.0180631	0.0734148	0.0984582	0.115494	0.115494	0.0686373	0.0424835	0.272092	0.0384468	-0.0386608	-0.185208	-0.0620885	-0.172531		0.0306452	0.109431	0.0238798
-2.54116	0.117503	0.0454741	-0.0356375	-0.00124212	0.0196145	0.174052	-0.122432	-0.00108753	0.0813707	0.0908417	0.119298	0.119298	0.0601039	0.0553711	0.270004	0.0368495	-0.0363651	-0.183357	-0.0524109	-0.181621		0.0287813	0.109818	0.0239642
-2.44285	0.117987	0.0419215	-0.0525644	-0.0332627	0.0289372	0.173696	-0.110809	-0.0161958	0.0930502	0.0831788	0.121747	0.121747	0.0546876	0.0656217	0.269189	0.0310534	-0.0316735	-0.179792	-0.0445901	-0.193316		0.0270307	0.111157	0.0242564
-2.34455	0.118539	0.0326815	-0.0679459	-0.0663606	0.0385973	0.174942	-0.0971913	-0.0336319	0.1033	0.0754946	0.124767	0.124767	0.053301	0.0708971	0.268336	0.0238145	-0.0279494	-0.176493	-0.0346905	-0.201515		0.025183	0.113096	0.0246795
-2.24625	0.119539	0.0249036	-0.0789236	-0.100221	0.0473167	0.179417	-0.0803145	-0.0512379	0.108572	0.0638962	0.123693	0.123693	0.0501077	0.0702284	0.262592	0.0165491	-0.0208516	-0.173767	-0.0279733	-0.205548		0.0225836	0.1143	0.0249424
-2.14794	0.117515	0.0162428	-0.0861989	-0.132237	0.0583329	0.181472	-0.0661287	-0.0687582	0.11257	0.0486567	0.119318	0.119318	0.0448545	0.0698816	0.25151	0.00690638	-0.0117614	-0.165182	-0.0247793	-0.214365		0.0188584	0.115112	0.0251195
-2.04964	0.110872	0.00796081	-0.0892391	-0.163309	0.0720098	0.184476	-0.0581101	-0.0865801	0.120121	0.0303573	0.116564	0.116564	0.0413297	0.0705117	0.239351	-0.00566356	-0.00214241	-0.150281	-0.0179871	-0.223234		0.0156786	0.116498	0.0254219
-1.95133	0.105659	0.00348374	-0.0916999	-0.187546	0.0830865	0.187699	-0.0536634	-0.104192	0.127204	0.0115326	0.11025	0.11025	0.035422	0.0732235	0.225989	-0.0167596	0.00816491	-0.138413	-0.00749228	-0.227624		0.0127287	0.117702	0.0256846
-1.85303	0.0998775	-0.00151713	-0.100066	-0.204071	0.0922877	0.198955	-0.0485221	-0.119713	0.133821	-0.00356818	0.103673	0.103673	0.0272994	0.0770087	0.213112	-0.0294049	0.0162431	-0.130602	-0.00116151	-0.230311		0.00985067	0.119837	0.0261507
-1.75473	0.0942398	-0.00495811	-0.104261	-0.218569	0.0989634	0.216354	-0.0416273	-0.127955	0.132978	-0.0135009	0.0960449	0.0960449	0.0191704	0.08243	0.203349	-0.0455955	0.0242496	-0.12478	0.0022672	-0.230485		0.00771806	0.121914	0.0266037
-1.65642	0.0886214	-0.0104143	-0.107334	-0.226496	0.100711	0.236971	-0.0362621	-0.136009	0.126266	-0.0320913	0.0882463	0.0882463	0.0102924	0.0858183	0.195668	-0.0610586	0.0338482	-0.122672	0.009488	-0.228616		0.00516119	0.123884	0.0270337
-1.55812	0.0833797	-0.0190911	-0.111928	-0.233577	0.101345	0.255849	-0.0305201	-0.14519	0.124654	-0.0518256	0.0801325	0.0801325	0.00173734	0.091296	0.193568	-0.0756678	0.0446975	-0.127848	0.0138064	-0.221033		0.00269591	0.126883	0.0276882
-1.45981	0.0772007	-0.0254337	-0.11397	-0.237315	0.100738	0.272233	-0.022881	-0.157197	0.126871	-0.0671741	0.0752122	0.0752122	-0.00696573	0.0963167	0.189407	-0.0898178	0.0515706	-0.138014	0.0155857	-0.212203		0.000468767	0.129918	0.0283505
-1.36151	0.0685632	-0.0284455	-0.109121	-0.245277	0.102114	0.286266	-0.0212323	-0.168881	0.124814	-0.0857971	0.0787672	0.0787672	-0.0161212	0.0968141	0.185172	-0.10681	0.0539249	-0.139629	0.0155383	-0.204706		-0.00176394	0.133058	0.0290357
-1.26321	0.0507269	-0.0336141	-0.0980171	-0.249916	0.103375	0.305373	-0.0173648	-0.180485	0.120402	-0.106905	0.0836314	0.0836314	-0.0235805	0.0990325	0.182959	-0.122063	0.0521129	-0.142693	0.0156477	-0.194801		-0.00362743	0.136426	0.0297706
-1.1649	0.0315478	-0.0372341	-0.0886661	-0.250571	0.106923	0.321088	-0.0116249	-0.185298	0.120137	-0.125353	0.0864153	0.0864153	-0.0297178	0.105781	0.185604	-0.136927	0.0545268	-0.144355	0.0134514	-0.177023		-0.00374402	0.139182	0.0303719
-1.0666	0.0128235	-0.0377706	-0.083002	-0.246912	0.109339	0.335609	-0.00490748	-0.184154	0.11987	-0.143789	0.0876374	0.0876374	-0.0293716	0.111679	0.191747	-0.151019	0.0547378	-0.143522	0.0124389	-0.162451		-0.0031691	0.141637	0.0309078
-0.968294	-0.0114154	-0.038702	-0.0758688	-0.236604	0.105769	0.35335	0.00181017	-0.187336	0.117605	-0.16048	0.0879945	0.0879945	-0.0352423	0.115531	0.197038	-0.164038	0.0572494	-0.1415	0.00690812	-0.147828		-0.00338828	0.144026	0.0314291
-0.86999	-0.0346922	-0.039597	-0.0717473	-0.220653	0.103215	0.372473	0.0112726	-0.191143	0.115559	-0.17762	0.0879936	0.0879936	-0.0415232	0.116348	0.205019	-0.17754	0.0584026	-0.140947	-0.000420125	-0.132512		-0.00350595	0.147046	0.0320881
-0.771686	-0.0562816	-0.037999	-0.0649855	-0.202072	0.0970031	0.390014	0.0212592	-0.195364	0.112995	-0.192696	0.0873796	0.0873796	-0.0475986	0.113707	0.212652	-0.1882	0.0617397	-0.14203	-0.00474839	-0.120687		-0.0034267	0.149858	0.0327017
-0.673382	-0.0787825	-0.0371393	-0.0623264	-0.182239	0.088693	0.401813	0.0293101	-0.196622	0.106925	-0.208271	0.0871996	0.0871996	-0.0522222	0.111905	0.215538	-0.197761	0.0701053	-0.143872	-0.00727524	-0.112322		-0.00400726	0.152039	0.0331776
-0.575078	-0.0971663	-0.0371216	-0.0563845	-0.16793	0.0798282	0.413938	0.0427335	-0.192798	0.099475	-0.220745	0.0863416	0.0863416	-0.0590122	0.111137	0.222082	-0.205041	0.0779646	-0.145677	-0.00550975	-0.107204		-0.00373746	0.154626	0.0337423
-0.476774	-0.118233	-0.0366328	-0.0510151	-0.150772	0.0732849	0.428118	0.0580173	-0.195618	0.0905216	-0.233374	0.0851809	0.0851809	-0.0711711	0.110377	0.230045	-0.209702	0.0824572	-0.143972	0.0010149	-0.102612		-0.00344522	0.158126	0.0345059
-0.37847	-0.138037	-0.0373473	-0.0474451	-0.127908	0.0675926	0.443309	0.0680684	-0.199121	0.0797041	-0.245498	0.0843608	0.0843608	-0.0856401	0.109191	0.235122	-0.209867	0.082508	-0.141472	0.00762017	-0.0945247		-0.00325123	0.161164	0.0351689
-0.280166	-0.156059	-0.0343668	-0.0414708	-0.103811	0.0614972	0.458421	0.07959	-0.199779	0.0702215	-0.255992	0.0841463	0.0841463	-0.100949	0.108536	0.238799	-0.210694	0.0809455	-0.137991	0.0143764	-0.0870615		-0.00237469	0.164239	0.0358399
-0.181862	-0.174753	-0.0318495	-0.0386732	-0.0768184	0.0582015	0.472886	0.0869585	-0.201596	0.0623908	-0.264163	0.0863638	0.0863638	-0.117683	0.109706	0.241607	-0.210599	0.0739628	-0.133783	0.0270366	-0.0801232		-0.00122812	0.167609	0.0365752
-0.0835584	-0.189725	-0.0297462	-0.0380034	-0.0497887	0.0563775	0.487902	0.094406	-0.200181	0.0560844	-0.268206	0.0912793	0.0912793	-0.130755	0.11239	0.246444	-0.207225	0.0649064	-0.135112	0.0381808	-0.070173		0.00101667	0.171025	0.0373208
0.0147456	-0.203565	-0.0296038	-0.0399364	-0.0251258	0.0599065	0.506644	0.100578	-0.200748	0.0457029	-0.270684	0.0929786	0.0929786	-0.144945	0.113025	0.252572	-0.202903	0.0634671	-0.14227	0.0462293	-0.0574564		0.00284212	0.175524	0.0383025
0.11305	-0.221772	-0.0342774	-0.0456588	-0.00769061	0.0675944	0.525844	0.110509	-0.201285	0.0322585	-0.273023	0.0962519	0.0962519	-0.160066	0.110439	0.258576	-0.200534	0.0639896	-0.144941	0.0495122	-0.0451063		0.00384363	0.180915	0.039479
0.211354	-0.239771	-0.0407241	-0.0493021	0.00926043	0.0740477	0.541263	0.120907	-0.201106	0.0152101	-0.276719	0.102502	0.102502	-0.172814	0.107154	0.262739	-0.193017	0.0657292	-0.144065	0.0547249	-0.0312987		0.00536118	0.185621	0.0405058
0.309658	-0.256307	-0.0480295	-0.0565813	0.0264338	0.0816788	0.548545	0.126792	-0.205604	0.00176483	-0.280774	0.106139	0.106139	-0.18752	0.103622	0.261481	-0.183911	0.0669431	-0.142497	0.0603746	-0.0236363		0.00525273	0.189173	0.0412809
0.407962	-0.271452	-0.0523683	-0.0607035	0.0393389	0.0905972	0.550808	0.13268	-0.209666	-0.00952115	-0.277976	0.109438	0.109438	-0.197545	0.104125	0.254888	-0.173761	0.063483	-0.138183	0.0643379	-0.0187684		0.00545953	0.190812	0.0416386
0.506266	-0.289254	-0.054388	-0.0644049	0.0540351	0.100085	0.554752	0.135918	-0.209534	-0.025297	-0.27475	0.113174	0.113174	-0.207184	0.103097	0.241427	-0.164496	0.0608279	-0.131387	0.0683731	-0.0179336		0.00531174	0.192338	0.0419716
0.60457	-0.307912	-0.0591578	-0.0686874	0.0669219	0.109933	0.557902	0.134519	-0.209568	-0.0455639	-0.270902	0.112815	0.112815	-0.218263	0.106016	0.227538	-0.158149	0.0613912	-0.123055	0.0695927	-0.0204192		0.00388831	0.194076	0.0423509
0.702874	-0.32176	-0.0659874	-0.0785827	0.0785412	0.11948	0.559292	0.134615	-0.207549	-0.0640692	-0.259908	0.106793	0.106793	-0.225744	0.112594	0.210289	-0.150482	0.0642459	-0.121174	0.0717186	-0.0201891		0.0024459	0.194643	0.0424747
0.801178	-0.328817	-0.0685437	-0.0917273	0.0921653	0.127886	0.556145	0.133506	-0.207134	-0.0828364	-0.248545	0.1002	0.1002	-0.233812	0.117927	0.188008	-0.143634	0.068797	-0.117491	0.0728602	-0.0212279		0.00069624	0.194121	0.0423608
0.899482	-0.334168	-0.0704891	-0.105872	0.102276	0.136345	0.555075	0.12984	-0.209936	-0.101571	-0.239981	0.0952814	0.0952814	-0.243097	0.119072	0.164218	-0.13561	0.0697435	-0.116499	0.0733634	-0.0279185		-0.00223235	0.19431	0.042402
0.997786	-0.340854	-0.0709539	-0.115399	0.109982	0.148415	0.555282	0.125236	-0.213779	-0.116546	-0.231177	0.0913031	0.0913031	-0.251847	0.121701	0.140955	-0.12676	0.0715374	-0.116958	0.0757602	-0.0320149		-0.0042406	0.195122	0.0425792
1.09609	-0.342986	-0.067663	-0.126617	0.113787	0.163608	0.548731	0.116242	-0.211433	-0.129029	-0.22223	0.0845678	0.0845678	-0.254037	0.1274	0.120718	-0.118349	0.0692188	-0.116322	0.0832697	-0.0393249		-0.00579411	0.194049	0.042345
1.19439	-0.341202	-0.0637779	-0.132477	0.113046	0.173796	0.538107	0.104393	-0.205629	-0.143353	-0.213268	0.0780668	0.0780668	-0.251135	0.136404	0.0988105	-0.10848	0.0650088	-0.115492	0.0916187	-0.0476964		-0.0072597	0.191359	0.0417581
1.2927	-0.341918	-0.0609312	-0.140331	0.11483	0.182481	0.526864	0.0926885	-0.19889	-0.156698	-0.205515	0.0712388	0.0712388	-0.249942	0.146327	0.0753736	-0.0985834	0.0555695	-0.116905	0.0991587	-0.0503969		-0.00921707	0.189233	0.0412941
1.391	-0.336582	-0.0602648	-0.142757	0.111597	0.191784	0.516477	0.0795607	-0.191795	-0.171289	-0.196379	0.0646562	0.0646562	-0.248324	0.154741	0.0562207	-0.0903875	0.040199	-0.119863	0.105528	-0.0539523		-0.0113087	0.186692	0.0407395
1.48931	-0.333383	-0.0584909	-0.145923	0.108126	0.199138	0.504626	0.0595644	-0.186416	-0.182742	-0.191276	0.0606872	0.0606872	-0.242413	0.164203	0.0341559	-0.0849145	0.0256404	-0.120557	0.110549	-0.0575238		-0.0138131	0.184188	0.0401932
1.58761	-0.328025	-0.0554631	-0.144276	0.100717	0.202436	0.487858	0.0359543	-0.174821	-0.192804	-0.184688	0.0535143	0.0535143	-0.233241	0.175394	0.0092668	-0.0786326	0.0115179	-0.123478	0.113361	-0.059042		-0.0165469	0.179883	0.0392538
1.68591	-0.316982	-0.051315	-0.137644	0.0900545	0.207245	0.467159	0.0148059	-0.166495	-0.201209	-0.174922	0.0448523	0.0448523	-0.222326	0.18842	-0.0120047	-0.0758441	0.000287304	-0.128458	0.115184	-0.0639378		-0.0189139	0.174918	0.0381703
1.78422	-0.311859	-0.0488221	-0.12943	0.0796226	0.211034	0.4425	-0.0107676	-0.160178	-0.208974	-0.16655	0.0355682	0.0355682	-0.212229	0.205568	-0.0306207	-0.0704982	-0.00716567	-0.132397	0.116762	-0.0708142		-0.0216841	0.170707	0.0372513
1.88252	-0.30559	-0.0479894	-0.118587	0.0649706	0.214155	0.414615	-0.0359548	-0.156743	-0.217642	-0.16194	0.0245761	0.0245761	-0.199191	0.219575	-0.0462659	-0.0696974	-0.0134989	-0.135465	0.113313	-0.0789633		-0.0255873	0.166103	0.0362466
1.98083	-0.298626	-0.0502059	-0.102561	0.0504673	0.213778	0.382594	-0.0632613	-0.157954	-0.228703	-0.16212	0.0116167	0.0116167	-0.189616	0.227634	-0.0593837	-0.0655776	-0.0205115	-0.13501	0.114926	-0.0861849		-0.0303541	0.161417	0.035224
2.07913	-0.292959	-0.0514138	-0.0861791	0.038755	0.208127	0.347015	-0.0853329	-0.155342	-0.23818	-0.157961	-0.000742924	-0.000742924	-0.178191	0.237762	-0.0716475	-0.0622123	-0.0341167	-0.130566	0.12081	-0.0969417		-0.0345029	0.15651	0.0341534
2.17743	-0.282775	-0.0510794	-0.0637391	0.0335686	0.200967	0.30816	-0.110707	-0.151524	-0.24642	-0.150265	-0.0139365	-0.0139365	-0.162081	0.249516	-0.0837403	-0.0578449	-0.049829	-0.128613	0.127379	-0.109298		-0.03781	0.151576	0.0330767
2.27574	-0.269261	-0.0480064	-0.0404571	0.027544	0.193742	0.270114	-0.13777	-0.148829	-0.248593	-0.147601	-0.0315347	-0.0315347	-0.142163	0.259475	-0.0937484	-0.0567251	-0.0661572	-0.12821	0.137022	-0.121193		-0.0411943	0.147357	0.032156
2.37404	-0.257311	-0.0425826	-0.016881	0.0187246	0.183674	0.239784	-0.160678	-0.146065	-0.248101	-0.149249	-0.0437151	-0.0437151	-0.120556	0.269279	-0.0976764	-0.0561317	-0.0838296	-0.129889	0.148018	-0.128424		-0.0432662	0.144791	0.0315961
2.47235	-0.246107	-0.0388534	0.00486474	0.00938594	0.174173	0.213824	-0.18268	-0.141449	-0.241096	-0.153951	-0.0538178	-0.0538178	-0.0998635	0.275199	-0.0993348	-0.0563304	-0.0977704	-0.132196	0.157853	-0.133872		-0.0447919	0.142784	0.0311579
2.57065	-0.23116	-0.0368676	0.0252921	-3.40075e-05	0.163512	0.186009	-0.203008	-0.136267	-0.233377	-0.158075	-0.063356	-0.063356	-0.078611	0.281375	-0.0978353	-0.0538057	-0.110773	-0.133251	0.168043	-0.141397		-0.0458471	0.141079	0.030786
2.66895	-0.215913	-0.0305016	0.0481878	-0.00696274	0.147721	0.157484	-0.220059	-0.12664	-0.224408	-0.160938	-0.0712386	-0.0712386	-0.0593373	0.283695	-0.0944775	-0.0523251	-0.128077	-0.133567	0.182161	-0.148345		-0.046239	0.139599	0.0304629
2.76726	-0.203253	-0.0225169	0.0710255	-0.00881524	0.133309	0.133492	-0.237077	-0.12132	-0.212845	-0.169489	-0.0772023	-0.0772023	-0.0459226	0.283459	-0.0850937	-0.0511261	-0.146465	-0.131336	0.19362	-0.155086		-0.0464922	0.139415	0.0304228
2.86556	-0.19052	-0.0182269	0.0940069	-0.0141365	0.122906	0.10969	-0.254816	-0.114055	-0.199756	-0.177903	-0.0852016	-0.0852016	-0.0318426	0.283261	-0.0720339	-0.0513664	-0.161442	-0.129641	0.204213	-0.159832		-0.0465949	0.140105	0.0305735
2.96387	-0.176487	-0.0161751	0.115548	-0.0207181	0.112526	0.0847678	-0.273386	-0.106023	-0.184955	-0.183557	-0.0930393	-0.0930393	-0.0184663	0.28117	-0.0613929	-0.052217	-0.174268	-0.124798	0.217635	-0.164122		-0.0465499	0.14125	0.0308233
3.06217	-0.158332	-0.016951	0.133702	-0.0256212	0.0993657	0.0590463	-0.2925	-0.100322	-0.174764	-0.188597	-0.0989407	-0.0989407	-0.012594	0.273953	-0.0528633	-0.0550939	-0.187464	-0.119399	0.226952	-0.169577		-0.0479471	0.142	0.030987
3.16047	-0.138627	-0.0196505	0.151891	-0.0299948	0.0826422	0.0372162	-0.308129	-0.0991962	-0.171934	-0.193008	-0.0985419	-0.0985419	-0.00860508	0.264727	-0.0486887	-0.0579957	-0.195618	-0.113948	0.231552	-0.169997		-0.0492224	0.142127	0.0310148
3.25878	-0.121826	-0.0240441	0.166373	-0.0332435	0.0660622	0.0201689	-0.321195	-0.101355	-0.165168	-0.19928	-0.0947897	-0.0947897	-0.00661882	0.253701	-0.0462024	-0.0608456	-0.200947	-0.106469	0.235747	-0.169751		-0.0502236	0.142	0.030987
3.35708	-0.104173	-0.027116	0.177634	-0.0381367	0.0509712	0.00131443	-0.334012	-0.103291	-0.16237	-0.203397	-0.0918138	-0.0918138	-0.00327551	0.238901	-0.0395854	-0.0642242	-0.201776	-0.0943931	0.240512	-0.17412		-0.0512082	0.141799	0.0309431
3.45539	-0.0871405	-0.0274329	0.185805	-0.0362013	0.0375888	-0.0141858	-0.345238	-0.107213	-0.158138	-0.207473	-0.0919475	-0.0919475	-0.00198137	0.221935	-0.0346082	-0.0656264	-0.198587	-0.083932	0.244084	-0.175746		-0.0518993	0.141294	0.0308328
3.55369	-0.0718704	-0.0265235	0.190494	-0.031623	0.0256886	-0.0254526	-0.353103	-0.112496	-0.152831	-0.206899	-0.0904528	-0.0904528	-0.00223665	0.204032	-0.0284098	-0.0628849	-0.191716	-0.0777367	0.247384	-0.177837		-0.0517463	0.140142	0.0305814
3.65199	-0.0569565	-0.027697	0.187411	-0.0273799	0.0150263	-0.030395	-0.358616	-0.123283	-0.147734	-0.205781	-0.0839035	-0.0839035	-0.000563659	0.184857	-0.0184566	-0.0632522	-0.180326	-0.0695074	0.249148	-0.184183		-0.0512748	0.138269	0.0301728
3.7503	-0.0471969	-0.0282903	0.1788	-0.0237895	0.00199472	-0.0317043	-0.363236	-0.13145	-0.143728	-0.210742	-0.0747796	-0.0747796	0.000722717	0.161722	-0.0105555	-0.0604685	-0.16578	-0.0574465	0.252865	-0.189627		-0.0508735	0.136178	0.0297165
3.8486	-0.0319466	-0.0274562	0.169484	-0.0222831	-0.00848275	-0.0311804	-0.36223	-0.138024	-0.139945	-0.21383	-0.0630387	-0.0630387	0.00564388	0.135079	-0.00389747	-0.0586223	-0.15234	-0.0478879	0.256059	-0.192422		-0.0495179	0.13348	0.0291277
3.94691	-0.0156116	-0.0236635	0.156399	-0.0155237	-0.0191156	-0.0293868	-0.358715	-0.14084	-0.134519	-0.210145	-0.0466788	-0.0466788	0.0117784	0.112031	5.83213e-05	-0.0512079	-0.136538	-0.0413943	0.260776	-0.195504		-0.0462239	0.13058	0.0284948
4.04521	-0.00276502	-0.0136467	0.139743	-0.0071624	-0.0273583	-0.0234576	-0.352945	-0.140982	-0.123971	-0.204579	-0.0240865	-0.0240865	0.0186558	0.0939131	0.00199319	-0.0512726	-0.11579	-0.0369225	0.263632	-0.200232		-0.0415659	0.127576	0.0278393
4.14351	0.0146838	-0.000169576	0.122452	0.000228971	-0.0378865	-0.020057	-0.349907	-0.142406	-0.108864	-0.200922	0.00122138	0.00122138	0.0237786	0.0784895	0.00266979	-0.0515574	-0.0924345	-0.0319121	0.263084	-0.201599		-0.0364943	0.125331	0.0273495
4.24182	0.032532	0.0153443	0.101152	0.00531125	-0.0522244	-0.0124203	-0.347343	-0.145751	-0.0890569	-0.202096	0.0276921	0.0276921	0.0233236	0.0611046	0.00458678	-0.0508955	-0.0681444	-0.0217338	0.264793	-0.201779		-0.0313956	0.12445	0.0271572
4.34012	0.0463641	0.0281978	0.0786328	0.0126915	-0.0637944	-0.00465597	-0.344904	-0.146597	-0.0748326	-0.195726	0.0542278	0.0542278	0.0154738	0.0438873	0.00812366	-0.05135	-0.0440277	-0.0132663	0.264661	-0.205425		-0.0269046	0.124171	0.0270964
4.43843	0.0620207	0.0367884	0.0570525	0.0226005	-0.070027	-0.000428584	-0.344252	-0.147756	-0.0660768	-0.182198	0.0777913	0.0777913	0.0100241	0.0277127	0.00689894	-0.0522696	-0.0183459	-0.00359402	0.264572	-0.212067		-0.0226881	0.12501	0.0272794
4.53673	0.0789737	0.0485777	0.0323272	0.0355012	-0.0723277	0.00766196	-0.343809	-0.149761	-0.0639356	-0.16498	0.102854	0.102854	0.00245237	0.01284	0.00720653	-0.0534716	0.00502659	0.00976663	0.266547	-0.221455		-0.0178576	0.127711	0.0278689
4.63503	0.0960731	0.061785	0.00658253	0.0462789	-0.0739132	0.0208212	-0.344058	-0.153322	-0.0591372	-0.14897	0.128285	0.128285	-0.00822091	-0.00532061	0.00784088	-0.0602332	0.024334	0.0241384	0.266117	-0.227347		-0.0134991	0.131422	0.0286787
4.73334	0.115083	0.072157	-0.0252608	0.0517475	-0.0692839	0.0341573	-0.34431	-0.159613	-0.0496587	-0.137923	0.154421	0.154421	-0.0139675	-0.0186288	0.00788809	-0.0631899	0.0475686	0.0412734	0.261218	-0.232043		-0.00869722	0.136027	0.0296836
4.83164	0.131926	0.0821735	-0.0540611	0.0524743	-0.0671922	0.0446607	-0.343096	-0.162076	-0.045599	-0.122337	0.178319	0.178319	-0.0112122	-0.029044	0.00718518	-0.0662848	0.0716902	0.0554923	0.260274	-0.238719		-0.00385547	0.14125	0.0308233
4.92995	0.148448	0.0917925	-0.0841387	0.0560118	-0.0671645	0.0598632	-0.340858	-0.164526	-0.0439515	-0.104937	0.203793	0.203793	-0.00505619	-0.0424146	0.00740201	-0.0679826	0.0947154	0.0704388	0.260389	-0.243882		0.0015868	0.147597	0.0322083
5.02825	0.160927	0.103178	-0.111422	0.0622728	-0.0663637	0.0735535	-0.336555	-0.166783	-0.0473662	-0.0899037	0.230478	0.230478	0.00139333	-0.050478	0.00767945	-0.0697983	0.116851	0.0821265	0.256042	-0.248104		0.00691036	0.154003	0.0336063
5.12655	0.168038	0.115024	-0.136749	0.0681412	-0.0638696	0.0911264	-0.330346	-0.168524	-0.0529754	-0.0767334	0.252737	0.252737	0.0135659	-0.0532898	0.00972927	-0.0708173	0.136539	0.0979496	0.254825	-0.251339		0.0127885	0.160059	0.0349277
5.22486	0.173979	0.127239	-0.161915	0.073443	-0.0577109	0.110647	-0.322921	-0.169529	-0.0540352	-0.0675678	0.269806	0.269806	0.0244571	-0.0571583	0.0170488	-0.0749386	0.154275	0.110615	0.255109	-0.256412		0.0182119	0.165792	0.0361788
5.32316	0.178316	0.142207	-0.1872	0.0783553	-0.0486841	0.127464	-0.319368	-0.166683	-0.0584689	-0.0538705	0.282804	0.282804	0.0327694	-0.060046	0.0267393	-0.0828238	0.170376	0.116778	0.253454	-0.260256		0.0227333	0.170943	0.0373029
5.42147	0.182864	0.154428	-0.208722	0.0805607	-0.0385366	0.150743	-0.318423	-0.166327	-0.0599045	-0.0428546	0.294388	0.294388	0.0390913	-0.059668	0.0324138	-0.0909646	0.185233	0.119518	0.246683	-0.259176		0.0267868	0.175506	0.0382985
5.51977	0.185506	0.164302	-0.228039	0.0802597	-0.0295504	0.174777	-0.318535	-0.1687	-0.0596817	-0.0335187	0.309265	0.309265	0.047319	-0.0593882	0.0402366	-0.100339	0.196901	0.12603	0.240192	-0.259194		0.0308553	0.180985	0.0394941
5.61807	0.188463	0.171132	-0.243472	0.0810493	-0.0214076	0.194766	-0.317838	-0.165949	-0.0611823	-0.0280809	0.319372	0.319372	0.0570693	-0.0603793	0.0508183	-0.114033	0.202293	0.137792	0.230093	-0.255992		0.0341944	0.184881	0.0403444
5.71638	0.187485	0.181542	-0.255936	0.0859942	-0.0112051	0.211583	-0.316412	-0.159859	-0.0625213	-0.0237436	0.329854	0.329854	0.0625801	-0.0636556	0.05746	-0.126637	0.202817	0.144054	0.219956	-0.247347		0.0372931	0.187695	0.0409584
5.81468	0.1861	0.191354	-0.267157	0.0894821	0.00479858	0.227192	-0.315304	-0.153143	-0.0645025	-0.0164422	0.339481	0.339481	0.0674353	-0.0632571	0.0661813	-0.142197	0.19739	0.147758	0.208407	-0.236341		0.0403359	0.189837	0.0414258
5.91299	0.183527	0.197556	-0.280432	0.0948621	0.0179454	0.242991	-0.320663	-0.14855	-0.0655196	-0.0107074	0.346671	0.346671	0.0671422	-0.0608809	0.0754242	-0.158316	0.191322	0.151577	0.196166	-0.225177		0.0420805	0.192574	0.0420231
6.01129	0.176525	0.20311	-0.29056	0.0958666	0.030135	0.261296	-0.326668	-0.14282	-0.0629819	-0.00888551	0.347857	0.347857	0.0627059	-0.0597196	0.0869961	-0.177664	0.183388	0.155118	0.186072	-0.212193		0.0427717	0.194392	0.0424197
6.10959	0.169627	0.203622	-0.305574	0.0921254	0.0439093	0.282659	-0.330378	-0.134772	-0.0662229	-0.00500952	0.343851	0.343851	0.0583765	-0.0578604	0.0994437	-0.192788	0.17106	0.159927	0.175083	-0.196973		0.0426978	0.195417	0.0426434
6.2079	0.161142	0.199498	-0.32118	0.0855046	0.0632793	0.307216	-0.336244	-0.128506	-0.0760353	-0.00403768	0.338865	0.338865	0.0539439	-0.059839	0.114013	-0.206021	0.155917	0.161729	0.163642	-0.183538		0.0414107	0.197258	0.0430453
6.3062	0.151829	0.196207	-0.334515	0.0773066	0.0878364	0.331837	-0.338813	-0.121914	-0.0867621	0.00188288	0.335456	0.335456	0.0523696	-0.0607613	0.126065	-0.217468	0.139677	0.157217	0.150512	-0.169616		0.0406902	0.198955	0.0434156
6.40451	0.143948	0.195481	-0.345541	0.0650638	0.113498	0.357021	-0.340775	-0.116397	-0.0948236	0.00530986	0.335331	0.335331	0.0573839	-0.0608749	0.13469	-0.229223	0.120889	0.152317	0.135072	-0.150779		0.0406461	0.201238	0.0439138
6.50281	0.132966	0.195679	-0.357632	0.0524701	0.135923	0.379061	-0.342322	-0.108146	-0.0970974	0.00324402	0.336173	0.336173	0.05846	-0.0628198	0.144493	-0.242262	0.102468	0.144037	0.117963	-0.130554		0.0399139	0.203765	0.0444652
6.60111	0.116182	0.19488	-0.366074	0.0361635	0.151039	0.390483	-0.340836	-0.0996231	-0.0951354	-0.000315031	0.331866	0.331866	0.0570454	-0.0635502	0.152622	-0.254864	0.0860358	0.131431	0.101071	-0.105854		0.0377217	0.203799	0.0444725
6.69942	0.0982433	0.193291	-0.372333	0.0230242	0.166532	0.399773	-0.339028	-0.0945463	-0.0966035	-0.00259189	0.32513	0.32513	0.0602578	-0.0628041	0.16166	-0.262016	0.0724546	0.115644	0.0844952	-0.0800849		0.0357814	0.203383	0.0443819
6.79772	0.0785374	0.190745	-0.371641	0.0151935	0.180705	0.409049	-0.34039	-0.0905367	-0.103143	-0.00181148	0.3189	0.3189	0.0590662	-0.0670091	0.169582	-0.272067	0.0568136	0.0963828	0.0710831	-0.0555312		0.0331413	0.203521	0.044412
6.89603	0.0585951	0.186949	-0.375441	0.00861346	0.196691	0.41871	-0.341562	-0.0859651	-0.103673	-0.00546756	0.313396	0.313396	0.0514506	-0.0705306	0.17386	-0.286077	0.0422965	0.0790589	0.0534654	-0.0297291		0.0299019	0.204728	0.0446754
6.99433	0.035355	0.182581	-0.37695	0.0030165	0.210643	0.424636	-0.346103	-0.0834687	-0.101013	-0.00999942	0.307598	0.307598	0.0386668	-0.0728469	0.174461	-0.300597	0.0262431	0.0588988	0.0363003	-0.00628128		0.0254369	0.205893	0.0449294
7.09263	0.0115236	0.177082	-0.373087	0.00103503	0.22031	0.432897	-0.349733	-0.0851874	-0.0950256	-0.01437	0.301261	0.301261	0.0274442	-0.0769501	0.181153	-0.314262	0.0105897	0.0410563	0.0230975	0.0191988		0.0219648	0.207153	0.0452045
7.19094	-0.00919582	0.172239	-0.371412	-0.00262853	0.222468	0.434171	-0.355566	-0.0860868	-0.0837841	-0.0166837	0.294993	0.294993	0.0163781	-0.0836527	0.187595	-0.328664	-0.00194844	0.014698	0.00728326	0.043877		0.0174537	0.208262	0.0454465
7.28924	-0.0334249	0.167873	-0.36587	-0.00503558	0.222736	0.432751	-0.365528	-0.0856855	-0.070185	-0.0169781	0.289059	0.289059	0.00664346	-0.0881539	0.190598	-0.338673	-0.015866	-0.00945456	-0.00594668	0.0696971		0.0133808	0.209027	0.0456133
7.38755	-0.0583377	0.161884	-0.355974	-0.00896091	0.222489	0.433347	-0.375232	-0.0882685	-0.0563675	-0.0214992	0.283773	0.283773	-0.00140433	-0.0922138	0.193878	-0.343511	-0.0257375	-0.0265779	-0.0174544	0.0941536		0.0100879	0.209712	0.0457628
7.48585	-0.0845126	0.157154	-0.347603	-0.00851905	0.218764	0.427885	-0.38257	-0.0869006	-0.0429786	-0.0210732	0.282971	0.282971	-0.0050798	-0.0955145	0.196792	-0.348412	-0.0334004	-0.0435864	-0.0261615	0.113327		0.00767762	0.210317	0.0458949
7.58415	-0.112314	0.153852	-0.341377	-0.00947292	0.214442	0.419608	-0.390378	-0.079497	-0.0299307	-0.017519	0.282144	0.282144	-0.00465428	-0.0965832	0.19554	-0.353147	-0.0382846	-0.0608634	-0.0343337	0.133482		0.00564288	0.210941	0.0460312
7.68246	-0.138218	0.149524	-0.336478	-0.0123292	0.207837	0.414545	-0.401292	-0.0795642	-0.0162252	-0.012571	0.283252	0.283252	-0.00852875	-0.0953742	0.191349	-0.354915	-0.0379613	-0.0787033	-0.0358987	0.152538		0.00371182	0.212343	0.046337
7.78076	-0.157501	0.141506	-0.328878	-0.0163915	0.197417	0.406774	-0.41345	-0.0787458	-0.00117309	-0.00630928	0.28039	0.28039	-0.0125472	-0.0894874	0.189559	-0.354641	-0.0388801	-0.0903466	-0.0357528	0.168442		0.00201873	0.212277	0.0463227
7.87907	-0.174426	0.133501	-0.31737	-0.0159936	0.180176	0.400509	-0.426479	-0.0768791	0.0161039	0.00177512	0.275137	0.275137	-0.0152388	-0.0870165	0.186578	-0.354282	-0.0325003	-0.102756	-0.0361302	0.181721		0.00057835	0.211615	0.0461783
7.97737	-0.190451	0.129064	-0.303645	-0.0151674	0.164831	0.395564	-0.435543	-0.0722527	0.0291959	0.0130877	0.27058	0.27058	-0.0171932	-0.0850045	0.182715	-0.353448	-0.0237377	-0.11411	-0.0352544	0.191525		6.67948e-05	0.210797	0.0459997
8.07567	-0.20265	0.123155	-0.287339	-0.0119863	0.150453	0.389018	-0.444614	-0.0698875	0.0359024	0.0244655	0.267852	0.267852	-0.0174155	-0.080245	0.178613	-0.348601	-0.0154359	-0.121425	-0.0380101	0.200971		3.35688e-05	0.209504	0.0457175
8.17398	-0.213841	0.121344	-0.264439	-0.00555637	0.13105	0.378744	-0.456781	-0.0710038	0.0469734	0.0332081	0.263049	0.263049	-0.014981	-0.0760619	0.174227	-0.34457	-0.00912529	-0.125598	-0.0381125	0.20972		6.48554e-05	0.207703	0.0453245
8.27228	-0.225008	0.12057	-0.23681	0.00528661	0.110092	0.366356	-0.465464	-0.0715703	0.0578515	0.041712	0.255332	0.255332	-0.0109908	-0.0680748	0.165955	-0.342892	-0.000207805	-0.130025	-0.0365602	0.216254		0.000356799	0.204907	0.0447145
8.37059	-0.238961	0.116536	-0.207177	0.0189988	0.0865951	0.349535	-0.47466	-0.0700922	0.0649762	0.0452919	0.248672	0.248672	-0.00666657	-0.0583287	0.160206	-0.344924	0.0093576	-0.132264	-0.0371549	0.219437		-9.76079e-05	0.202361	0.0441589
8.46889	-0.252563	0.108316	-0.179689	0.0361598	0.0592317	0.332534	-0.481896	-0.0701239	0.0726515	0.0483086	0.239167	0.239167	-0.00615177	-0.0487001	0.159222	-0.345254	0.0242936	-0.128865	-0.0376491	0.222502		-0.000466925	0.199679	0.0435736
8.56719	-0.261195	0.100319	-0.15004	0.0561614	0.0341925	0.321446	-0.487495	-0.0718529	0.0785439	0.048586	0.229289	0.229289	-0.00341007	-0.03661	0.159089	-0.34162	0.0376248	-0.119842	-0.0387563	0.227071		0.000539459	0.197122	0.0430155
8.6655	-0.264633	0.0909073	-0.120866	0.0776871	0.0135781	0.317469	-0.498053	-0.0726624	0.0821262	0.0476462	0.22306	0.22306	0.00395235	-0.0252861	0.162695	-0.338892	0.047603	-0.110405	-0.0406636	0.228419		0.00233715	0.196459	0.0428708
8.7638	-0.271876	0.0821436	-0.0916176	0.0959993	-0.00912812	0.3127	-0.507026	-0.0695566	0.0852884	0.0447401	0.216392	0.216392	0.00743817	-0.0100757	0.165418	-0.337819	0.0535795	-0.101356	-0.0385597	0.22973		0.00364021	0.196184	0.0428108
8.86211	-0.277407	0.074713	-0.065487	0.111446	-0.034044	0.308567	-0.510155	-0.0643829	0.0916983	0.0416236	0.210734	0.210734	0.0145261	0.00803233	0.172604	-0.333836	0.0588737	-0.0923821	-0.0351493	0.232895		0.00618016	0.195858	0.0427397
8.96041	-0.279533	0.0699264	-0.0337767	0.126924	-0.0611517	0.303788	-0.51143	-0.0611631	0.0963296	0.0433133	0.205934	0.205934	0.0247668	0.0248008	0.180712	-0.32497	0.062912	-0.0820889	-0.0279417	0.235204		0.00992452	0.195179	0.0425916
9.05871	-0.277876	0.0675229	-0.00112437	0.138099	-0.086151	0.298609	-0.506684	-0.0573443	0.0965335	0.0449079	0.200038	0.200038	0.0386338	0.0427509	0.19173	-0.314942	0.0666613	-0.0698175	-0.0237327	0.23288		0.0140367	0.193425	0.0422088
9.15702	-0.272729	0.0660122	0.0194033	0.146259	-0.10601	0.290835	-0.504256	-0.0499789	0.0971644	0.0475483	0.192602	0.192602	0.0522908	0.057267	0.197744	-0.305746	0.0688918	-0.0575952	-0.0219386	0.226755		0.016856	0.191295	0.0417439
9.25532	-0.267866	0.0662465	0.0404351	0.1536	-0.116271	0.286313	-0.499378	-0.0440794	0.0981167	0.0495377	0.189683	0.189683	0.0621044	0.0764612	0.204246	-0.294673	0.0681757	-0.0410037	-0.0162935	0.220755		0.0212897	0.189307	0.0413101
9.35363	-0.260876	0.0633292	0.0545317	0.162532	-0.126876	0.280686	-0.490473	-0.0404449	0.0947372	0.0536315	0.189974	0.189974	0.0698106	0.0960141	0.209237	-0.283561	0.068417	-0.026224	-0.015418	0.212798		0.02509	0.186969	0.0408
9.45193	-0.249831	0.0609782	0.0632623	0.173535	-0.137432	0.274841	-0.476396	-0.0370965	0.096987	0.0556324	0.190943	0.190943	0.0793732	0.115395	0.212115	-0.275255	0.0622942	-0.0135799	-0.0140501	0.204534		0.0288597	0.184152	0.0401852
9.55023	-0.237782	0.0585582	0.0738952	0.179942	-0.146009	0.26808	-0.459514	-0.0350368	0.102761	0.0528053	0.188954	0.188954	0.0843813	0.132672	0.216835	-0.263827	0.053772	-0.00217035	-0.0105958	0.199079		0.0322876	0.180453	0.0393781
9.64854	-0.224797	0.0580258	0.0838578	0.187373	-0.154256	0.261169	-0.442054	-0.0339046	0.107308	0.0495753	0.187572	0.187572	0.0828377	0.148718	0.225023	-0.250474	0.0475514	0.00731344	-0.00594954	0.191103		0.0356782	0.176736	0.0385669
9.74684	-0.213924	0.0615127	0.0931875	0.194308	-0.159131	0.250643	-0.419606	-0.0285225	0.111413	0.0479002	0.185621	0.185621	0.0875655	0.16464	0.232606	-0.237644	0.0400933	0.0123862	-0.00588755	0.180629		0.0391705	0.172297	0.0375982
9.84515	-0.207301	0.0666023	0.100393	0.198244	-0.161489	0.242585	-0.397856	-0.0259179	0.112307	0.0434434	0.186953	0.186953	0.093122	0.175874	0.23881	-0.223986	0.0369941	0.016353	-0.0103763	0.168163		0.0419936	0.16832	0.0367305
9.94345	-0.201905	0.0721073	0.101672	0.196043	-0.163319	0.233179	-0.376551	-0.0267688	0.112799	0.0358169	0.189057	0.189057	0.0980444	0.186661	0.24417	-0.207388	0.0268896	0.0223568	-0.0163274	0.158737		0.0437165	0.164214	0.0358345
10.0418	-0.198379	0.0760998	0.0977874	0.190453	-0.167174	0.221977	-0.356037	-0.0286238	0.118003	0.023967	0.18837	0.18837	0.107331	0.197057	0.250965	-0.190664	0.0135181	0.0264364	-0.0215742	0.149051		0.0443467	0.160494	0.0350227
10.1401	-0.195267	0.0811836	0.0872018	0.180564	-0.172499	0.208007	-0.338569	-0.0283341	0.126554	0.0118427	0.191294	0.191294	0.115191	0.204238	0.257504	-0.17911	0.00217458	0.0316521	-0.0228997	0.135553		0.0443788	0.157577	0.0343862
10.2384	-0.193145	0.0828619	0.0736295	0.169346	-0.175395	0.197369	-0.319195	-0.0294438	0.132991	0.00188509	0.196498	0.196498	0.122665	0.207931	0.266185	-0.167246	-0.00718426	0.0342918	-0.0274975	0.121353		0.04422	0.154978	0.033819
10.3367	-0.191589	0.0833134	0.0512696	0.156503	-0.179691	0.191179	-0.302402	-0.0295714	0.141688	-0.00471221	0.20555	0.20555	0.128289	0.2043	0.277737	-0.15197	-0.0172142	0.0365779	-0.0332401	0.109061		0.0440314	0.15343	0.0334812
10.435	-0.188912	0.0848564	0.0229532	0.141841	-0.185715	0.187658	-0.288507	-0.029155	0.151215	-0.00723778	0.208043	0.208043	0.13154	0.200651	0.285396	-0.134203	-0.0270535	0.0356648	-0.036366	0.102022		0.0431367	0.151716	0.0331071
10.5333	-0.187684	0.0890577	-0.00777745	0.127111	-0.194008	0.182323	-0.276258	-0.0279743	0.155689	-0.008987	0.20953	0.20953	0.136363	0.197537	0.288458	-0.114393	-0.0403502	0.0297278	-0.037737	0.0914786		0.0410817	0.150323	0.0328032
10.6316	-0.192302	0.0947193	-0.0403834	0.108726	-0.206087	0.174212	-0.268786	-0.0278646	0.157611	-0.00344774	0.211836	0.211836	0.140713	0.191813	0.292863	-0.0936049	-0.0538227	0.0209014	-0.0387131	0.0779586		0.0379089	0.150523	0.0328467
10.7299	-0.196898	0.100926	-0.0749892	0.0911629	-0.221363	0.166881	-0.263474	-0.0318934	0.160371	0.00417848	0.213769	0.213769	0.14466	0.186492	0.291968	-0.071777	-0.063204	0.0144211	-0.0392357	0.0661249		0.0345945	0.15159	0.0330796
10.8282	-0.195645	0.10845	-0.111963	0.0749175	-0.236188	0.158664	-0.265302	-0.0391953	0.166706	0.0141458	0.217935	0.217935	0.149935	0.177071	0.28633	-0.049473	-0.066714	0.0110026	-0.0410815	0.0506052		0.0314068	0.153527	0.0335023
10.9265	-0.198354	0.116077	-0.15383	0.0584629	-0.249364	0.153167	-0.278083	-0.046489	0.171211	0.0229649	0.21919	0.21919	0.152993	0.164078	0.276713	-0.0279878	-0.0679863	0.00786548	-0.0467789	0.0327219		0.026288	0.156966	0.0342528
11.0248	-0.201518	0.122362	-0.19815	0.0412551	-0.261145	0.14794	-0.296571	-0.0542599	0.175957	0.0301999	0.219335	0.219335	0.152379	0.152856	0.269867	-0.00678146	-0.0698595	0.0014608	-0.0551392	0.0150482		0.0202285	0.162025	0.0353567
11.1231	-0.206886	0.129987	-0.243678	0.0281607	-0.275589	0.145227	-0.319491	-0.0609346	0.188151	0.0396546	0.220854	0.220854	0.150525	0.140944	0.261602	0.0136417	-0.0676585	-0.00469131	-0.0596989	0.00252125		0.0151748	0.169106	0.0369018
11.2214	-0.213977	0.13748	-0.28137	0.0139857	-0.291889	0.145255	-0.341222	-0.0695404	0.198216	0.0476658	0.223465	0.223465	0.148366	0.133662	0.253971	0.0354269	-0.0631327	-0.00897067	-0.0626436	-0.00862621		0.0109793	0.176683	0.0385555
11.3197	-0.218844	0.14091	-0.318623	0.0036049	-0.314954	0.145403	-0.366894	-0.0764445	0.20646	0.0579468	0.222087	0.222087	0.150143	0.119691	0.244525	0.0559039	-0.0561903	-0.0133771	-0.0687825	-0.0203933		0.00571295	0.184705	0.040306
11.418	-0.222132	0.148342	-0.351945	-0.00742208	-0.336215	0.145992	-0.393054	-0.0814055	0.219241	0.0696929	0.216442	0.216442	0.15453	0.101795	0.237956	0.0747757	-0.0495999	-0.0126987	-0.070737	-0.0322885		0.00138551	0.192671	0.0420443
11.5163	-0.227692	0.155265	-0.383635	-0.0186208	-0.355494	0.144928	-0.423446	-0.08606	0.222844	0.0876841	0.211965	0.211965	0.155779	0.0813498	0.234137	0.0937169	-0.0367213	-0.010175	-0.0759401	-0.0441144		-0.00311328	0.201026	0.0438675
11.6146	-0.232806	0.160583	-0.417777	-0.0259559	-0.371168	0.144573	-0.460974	-0.0909037	0.218653	0.107159	0.208608	0.208608	0.158915	0.0606194	0.229393	0.110348	-0.026445	-0.00433773	-0.0834414	-0.0577782		-0.0082064	0.21028	0.0458868
11.7129	-0.238183	0.161668	-0.449587	-0.0327409	-0.387431	0.146459	-0.495475	-0.102268	0.215822	0.123455	0.200541	0.200541	0.165384	0.0383432	0.224352	0.127961	-0.0257121	0.0048179	-0.091423	-0.0683396		-0.0140906	0.219215	0.0478366
11.8112	-0.239974	0.160796	-0.482113	-0.0384759	-0.400747	0.153862	-0.532722	-0.114857	0.210821	0.137598	0.194051	0.194051	0.167881	0.01161	0.218753	0.14367	-0.0281579	0.0159513	-0.098949	-0.0769299		-0.020194	0.228333	0.0498263
11.9095	-0.240739	0.161203	-0.513818	-0.0419118	-0.411573	0.16117	-0.568016	-0.122668	0.207706	0.154128	0.18683	0.18683	0.172681	-0.0105412	0.212206	0.157365	-0.0316464	0.0221868	-0.100496	-0.0855717		-0.0252339	0.237211	0.0517636
12.0078	-0.244509	0.161139	-0.540569	-0.0417878	-0.419766	0.169154	-0.601213	-0.128766	0.203529	0.172883	0.176932	0.176932	0.176703	-0.0285176	0.20852	0.170637	-0.0337667	0.0277476	-0.0977562	-0.0981533		-0.0295314	0.245436	0.0535586
12.1061	-0.247806	0.16369	-0.560289	-0.0359445	-0.426768	0.177773	-0.636215	-0.136077	0.195857	0.194414	0.170342	0.170342	0.176484	-0.0498722	0.203656	0.184632	-0.0370027	0.0373223	-0.0967095	-0.10742		-0.0329796	0.253548	0.0553286
12.2044	-0.252756	0.165881	-0.572806	-0.0264669	-0.4346	0.189369	-0.668582	-0.147059	0.187772	0.218603	0.157078	0.157078	0.177906	-0.0702639	0.198543	0.203847	-0.0413648	0.0406327	-0.0973943	-0.11513		-0.0364856	0.261056	0.0569671
12.3027	-0.257702	0.168868	-0.583583	-0.015686	-0.439766	0.197215	-0.700518	-0.152302	0.176743	0.239954	0.145502	0.145502	0.178157	-0.0876536	0.189671	0.224263	-0.0440633	0.0407561	-0.0966644	-0.123873		-0.039759	0.267906	0.058462
12.401	-0.26393	0.174644	-0.585005	-0.00524727	-0.44213	0.203558	-0.729591	-0.158139	0.16451	0.260259	0.134806	0.134806	0.178479	-0.10092	0.177084	0.244296	-0.0509559	0.0436183	-0.094235	-0.131059		-0.0422576	0.273469	0.0596759
12.4994	-0.266825	0.180948	-0.580592	0.00496021	-0.436853	0.213719	-0.75534	-0.168835	0.153425	0.279714	0.129735	0.129735	0.178688	-0.115196	0.170305	0.263893	-0.0595247	0.0505949	-0.0929834	-0.140007		-0.043022	0.278678	0.0608125
12.5977	-0.268849	0.188985	-0.570789	0.012777	-0.425342	0.223176	-0.781477	-0.178275	0.147485	0.298282	0.126163	0.126163	0.177036	-0.132581	0.162132	0.278402	-0.0660916	0.0607206	-0.0946623	-0.146941		-0.0431844	0.283174	0.0617937
12.696	-0.265123	0.196835	-0.559803	0.0209012	-0.407334	0.231699	-0.800919	-0.187711	0.142203	0.311427	0.118059	0.118059	0.174626	-0.147396	0.149649	0.288252	-0.0680075	0.0712615	-0.0955026	-0.15005		-0.0429438	0.285167	0.0622285
12.7943	-0.264459	0.200674	-0.547589	0.0271284	-0.383138	0.236527	-0.813567	-0.192138	0.134716	0.323301	0.108798	0.108798	0.169177	-0.163192	0.141465	0.298381	-0.0734831	0.078483	-0.100712	-0.153632		-0.0432231	0.285563	0.062315
12.8926	-0.265513	0.201479	-0.532719	0.0316468	-0.354399	0.241601	-0.817422	-0.192566	0.126306	0.337361	0.100649	0.100649	0.165622	-0.178133	0.138174	0.307844	-0.0832584	0.0837007	-0.107811	-0.152674		-0.0424732	0.284688	0.0621241
12.9909	-0.263059	0.202718	-0.511101	0.0377424	-0.324368	0.241463	-0.809751	-0.194281	0.116786	0.353716	0.0938556	0.0938556	0.162698	-0.188234	0.133808	0.312921	-0.0927489	0.0900787	-0.115054	-0.148584		-0.0403769	0.281374	0.0614009
13.0892	-0.264549	0.202921	-0.489844	0.0451137	-0.291946	0.241728	-0.797761	-0.198629	0.101923	0.367335	0.0893839	0.0893839	0.163285	-0.201359	0.127884	0.315185	-0.102029	0.100473	-0.122651	-0.144729		-0.0384441	0.277833	0.0606282
13.1875	-0.267424	0.199631	-0.468111	0.0507617	-0.257645	0.238144	-0.784552	-0.20111	0.0788034	0.378148	0.0825247	0.0825247	0.159099	-0.212732	0.122351	0.317135	-0.115664	0.106992	-0.132653	-0.138925		-0.0381351	0.273286	0.059636
13.2858	-0.271265	0.19397	-0.448339	0.0575626	-0.222663	0.233247	-0.771203	-0.200898	0.0544183	0.390372	0.0768736	0.0768736	0.153755	-0.225694	0.115041	0.31618	-0.130776	0.105445	-0.1436	-0.132191		-0.0386446	0.268889	0.0586764
13.3841	-0.278471	0.190971	-0.427412	0.0577112	-0.179957	0.227907	-0.754342	-0.202094	0.0283765	0.400497	0.0744879	0.0744879	0.148151	-0.233438	0.10852	0.315621	-0.147598	0.100354	-0.15418	-0.12478		-0.0387594	0.264151	0.0576424
13.4824	-0.289207	0.186583	-0.405171	0.0543087	-0.137028	0.22275	-0.736402	-0.203137	0.00235216	0.404569	0.0747395	0.0747395	0.139432	-0.235875	0.101675	0.313279	-0.163109	0.09103	-0.165893	-0.115631		-0.0392998	0.258923	0.0565016
13.5807	-0.298065	0.181928	-0.381754	0.0502615	-0.098146	0.216421	-0.718881	-0.202164	-0.0166515	0.405494	0.0702776	0.0702776	0.132869	-0.237306	0.0940422	0.309446	-0.181569	0.0793971	-0.173052	-0.105062		-0.0401118	0.253531	0.055325
13.679	-0.306228	0.180639	-0.357429	0.0441936	-0.0646196	0.21281	-0.695925	-0.199475	-0.0291822	0.405828	0.064822	0.064822	0.124478	-0.234031	0.0867657	0.30351	-0.193012	0.0634824	-0.180141	-0.0918793		-0.0400285	0.247354	0.053977
13.7773	-0.315494	0.181119	-0.335294	0.0344781	-0.030988	0.204663	-0.675438	-0.187849	-0.0415371	0.408535	0.064584	0.064584	0.115077	-0.228669	0.0755996	0.292703	-0.1947	0.0435738	-0.186303	-0.0816592		-0.0396507	0.24124	0.0526429
13.8756	-0.327838	0.181957	-0.31123	0.0256158	-0.00199821	0.185808	-0.65661	-0.173731	-0.0526919	0.409155	0.0600856	0.0600856	0.108646	-0.219912	0.065846	0.287589	-0.193016	0.0252239	-0.191962	-0.0715914		-0.0395284	0.235285	0.0513435
13.9739	-0.340542	0.181754	-0.29097	0.0165435	0.0238633	0.165051	-0.641074	-0.162622	-0.0633804	0.406244	0.0546678	0.0546678	0.0984777	-0.213745	0.0583328	0.280441	-0.188915	0.0118924	-0.199457	-0.0589987		-0.0403885	0.230012	0.0501927
14.0722	-0.348313	0.180633	-0.271304	0.00689532	0.0469909	0.143251	-0.623886	-0.151699	-0.075515	0.400365	0.0555236	0.0555236	0.0871105	-0.209287	0.045676	0.268262	-0.180361	-0.000864483	-0.208209	-0.0446066		-0.0411907	0.224067	0.0488954
14.1705	-0.354198	0.174069	-0.256785	-0.00534546	0.0708058	0.119384	-0.603823	-0.142429	-0.090183	0.389915	0.0568225	0.0568225	0.078131	-0.200246	0.0337623	0.255652	-0.164705	-0.0186686	-0.216666	-0.0338943		-0.0425789	0.217315	0.0474219
14.2688	-0.358916	0.165195	-0.246436	-0.0205846	0.0985495	0.0963585	-0.582208	-0.130895	-0.105952	0.373758	0.0632292	0.0632292	0.066463	-0.190896	0.0205618	0.238653	-0.149073	-0.0337228	-0.22612	-0.0213525		-0.044008	0.210443	0.0459225
14.3671	-0.360783	0.155723	-0.237366	-0.0371792	0.119265	0.0750076	-0.561302	-0.123002	-0.116014	0.359695	0.0675485	0.0675485	0.0534528	-0.183647	0.00859382	0.221016	-0.133304	-0.0436778	-0.23523	-0.00792048		-0.0455788	0.204105	0.0445393
14.4654	-0.362274	0.143436	-0.233134	-0.0519064	0.135417	0.0501229	-0.540965	-0.112798	-0.12373	0.341899	0.0654446	0.0654446	0.0441504	-0.176163	0.000473497	0.200425	-0.110863	-0.0521225	-0.244876	0.00465108		-0.0478684	0.197252	0.0430439
14.5637	-0.367303	0.12866	-0.231442	-0.0677335	0.146075	0.0175092	-0.521307	-0.0972366	-0.132214	0.320445	0.0619764	0.0619764	0.0379105	-0.170449	-0.0115709	0.176537	-0.0851297	-0.0610586	-0.251453	0.0147324		-0.0515538	0.190182	0.041501
14.662	-0.370161	0.11318	-0.233366	-0.0826623	0.152216	-0.00962713	-0.500206	-0.0856986	-0.140357	0.299056	0.0608974	0.0608974	0.0313591	-0.160641	-0.0183881	0.155545	-0.0601188	-0.0742557	-0.252738	0.0238592		-0.0545604	0.183554	0.0400548
14.7603	-0.37632	0.0967171	-0.236595	-0.0954077	0.148197	-0.0331591	-0.485501	-0.0742433	-0.145909	0.280094	0.0621856	0.0621856	0.0270724	-0.152012	-0.0224842	0.136563	-0.03922	-0.0875454	-0.252903	0.0304124		-0.0578936	0.178586	0.0389707
14.8586	-0.378498	0.0835511	-0.23919	-0.105482	0.139287	-0.0539689	-0.473518	-0.0627509	-0.151761	0.260479	0.0653672	0.0653672	0.0264255	-0.143129	-0.0312669	0.117908	-0.0181783	-0.0955633	-0.245025	0.0365716		-0.0601687	0.173634	0.03789
14.957	-0.381925	0.0733327	-0.244795	-0.113501	0.127824	-0.075515	-0.466425	-0.0529393	-0.159876	0.235254	0.068958	0.068958	0.0222272	-0.131752	-0.0379665	0.0957882	0.00626062	-0.102045	-0.23534	0.0394314		-0.0632022	0.169239	0.0369309
15.0553	-0.385	0.0624848	-0.25407	-0.121101	0.115466	-0.091907	-0.462753	-0.0418522	-0.16616	0.206777	0.069778	0.069778	0.0206932	-0.123117	-0.0393996	0.0772204	0.0291535	-0.109819	-0.22053	0.0390531		-0.0662653	0.165449	0.036104
15.1536	-0.383434	0.0515329	-0.263818	-0.128401	0.1001	-0.107983	-0.460217	-0.0257982	-0.167476	0.181226	0.0689402	0.0689402	0.0203497	-0.113541	-0.0417405	0.0611011	0.0550502	-0.121235	-0.199744	0.0381798		-0.0683985	0.161958	0.035342
15.2519	-0.378056	0.041127	-0.274692	-0.136532	0.0867589	-0.119484	-0.456569	-0.0133075	-0.166566	0.156412	0.0694625	0.0694625	0.0275771	-0.106729	-0.0431891	0.0460557	0.0824317	-0.125682	-0.176844	0.032295		-0.0693034	0.159059	0.0347095
15.3502	-0.369973	0.032407	-0.283937	-0.144294	0.0720749	-0.128586	-0.452896	-0.00292726	-0.16401	0.131926	0.0667694	0.0667694	0.0390603	-0.103518	-0.0420962	0.0317819	0.109904	-0.1227	-0.15176	0.0245632		-0.069572	0.156274	0.0341018
15.4485	-0.360316	0.0272136	-0.291983	-0.144593	0.0495658	-0.133967	-0.450313	0.0118064	-0.160157	0.104984	0.0644182	0.0644182	0.0490023	-0.102385	-0.0420931	0.0168115	0.141697	-0.112268	-0.12518	0.016281		-0.0688529	0.15391	0.033586
15.5468	-0.347791	0.0232646	-0.300976	-0.143518	0.0273596	-0.136867	-0.449933	0.0280996	-0.159543	0.0809797	0.0620242	0.0620242	0.0632789	-0.105946	-0.0426244	0.00273911	0.169353	-0.102157	-0.0998389	0.00506311		-0.0682504	0.152987	0.0333845
15.6451	-0.339492	0.0202518	-0.306017	-0.141831	0.00427693	-0.135057	-0.447807	0.042597	-0.165617	0.0548328	0.0617853	0.0617853	0.0767285	-0.106445	-0.0455734	-0.00896041	0.195682	-0.0932376	-0.0760702	-0.00797253		-0.067807	0.153029	0.0333936
15.7434	-0.333204	0.0168145	-0.306964	-0.139244	-0.0137513	-0.132825	-0.448673	0.0511268	-0.174677	0.027945	0.0633986	0.0633986	0.09511	-0.114515	-0.0485087	-0.0199759	0.216672	-0.078635	-0.0494625	-0.0242707		-0.0675121	0.154261	0.0336625
15.8417	-0.323127	0.0146307	-0.30654	-0.131868	-0.0294192	-0.124279	-0.448677	0.0555431	-0.182236	0.00316675	0.064416	0.064416	0.115622	-0.123446	-0.0490856	-0.0288985	0.233032	-0.0634327	-0.0253327	-0.0398957		-0.0662705	0.155368	0.033904
15.94	-0.311535	0.0121489	-0.30489	-0.125546	-0.0470943	-0.105344	-0.446277	0.0552385	-0.185442	-0.0163527	0.0686901	0.0686901	0.131764	-0.133505	-0.0507051	-0.0441873	0.247502	-0.0504145	0.00054321	-0.0589218		-0.0647819	0.156299	0.0341073
16.0383	-0.300738	0.00676817	-0.299184	-0.121357	-0.0631206	-0.084928	-0.444108	0.0539657	-0.192651	-0.0338738	0.073829	0.073829	0.153623	-0.143279	-0.0502549	-0.0564231	0.254392	-0.0380019	0.0252427	-0.0777898		-0.063203	0.157801	0.0344351
16.1366	-0.292312	0.00262399	-0.298054	-0.116869	-0.0744839	-0.0649194	-0.443805	0.0573702	-0.197263	-0.0491094	0.0755746	0.0755746	0.178867	-0.153606	-0.0445963	-0.0620567	0.256556	-0.0293709	0.051821	-0.0961038		-0.0612081	0.160595	0.0350447
16.2349	-0.287578	0.00328381	-0.296308	-0.113719	-0.0850353	-0.0396331	-0.442135	0.0657228	-0.195717	-0.0601001	0.071313	0.071313	0.202719	-0.168839	-0.0402783	-0.066459	0.251732	-0.016329	0.0787363	-0.110448		-0.058888	0.163165	0.0356055
16.3332	-0.28351	0.00663998	-0.295198	-0.105811	-0.0962756	-0.0153605	-0.444755	0.0745394	-0.1935	-0.0669219	0.065903	0.065903	0.233585	-0.185957	-0.0326511	-0.0703455	0.243516	-0.0014764	0.109821	-0.127694		-0.0559775	0.167689	0.0365927
16.4315	-0.281326	0.0121285	-0.29152	-0.0928059	-0.101402	0.00951429	-0.446833	0.0815947	-0.193702	-0.0741415	0.0611723	0.0611723	0.265497	-0.200674	-0.0253045	-0.0754886	0.233059	0.0100062	0.141958	-0.143433		-0.0525265	0.172792	0.0377062
16.5298	-0.277215	0.0196414	-0.2836	-0.0801087	-0.102828	0.0360909	-0.44966	0.0843793	-0.196766	-0.0743612	0.0599241	0.0599241	0.290908	-0.215502	-0.0212811	-0.0794416	0.221455	0.015847	0.171845	-0.158378		-0.0489563	0.177553	0.0387453
16.6281	-0.269296	0.0295906	-0.275866	-0.0644023	-0.108235	0.0689409	-0.456104	0.0835618	-0.199296	-0.0717857	0.0555614	0.0555614	0.314957	-0.229375	-0.0141485	-0.0813549	0.208159	0.0191529	0.199555	-0.173286		-0.0454054	0.182636	0.0398544
16.7264	-0.265974	0.0373687	-0.268242	-0.0464201	-0.111505	0.0979485	-0.463824	0.0882015	-0.203991	-0.0690434	0.0490133	0.0490133	0.341548	-0.242967	-0.00954338	-0.0825457	0.192782	0.0266639	0.226864	-0.187801		-0.0421226	0.188956	0.0412337
16.8247	-0.26248	0.0447656	-0.25968	-0.0338694	-0.103355	0.122638	-0.464609	0.0974079	-0.209626	-0.0663433	0.0436459	0.0436459	0.364136	-0.258301	-0.00239034	-0.0857975	0.176412	0.0339524	0.251585	-0.201073		-0.0384668	0.194396	0.0424206
16.923	-0.25915	0.0501485	-0.249344	-0.0216519	-0.0961522	0.145148	-0.465152	0.102306	-0.211676	-0.0616897	0.0373809	0.0373809	0.382827	-0.27501	0.00801657	-0.0905226	0.161662	0.0362961	0.270885	-0.213103		-0.0355699	0.199029	0.0434317
17.0213	-0.256384	0.0507151	-0.234896	-0.0110397	-0.0924757	0.170178	-0.460971	0.108531	-0.212209	-0.0537357	0.0287908	0.0287908	0.401537	-0.292794	0.0113029	-0.0874111	0.144172	0.0369112	0.290339	-0.227595		-0.0329121	0.203258	0.0443545
17.1196	-0.255989	0.0524532	-0.216937	-0.00301995	-0.0925927	0.192376	-0.457607	0.116808	-0.213242	-0.0435863	0.0238969	0.0238969	0.415265	-0.311026	0.0115947	-0.0839663	0.126006	0.0381233	0.305899	-0.239456		-0.0305551	0.207176	0.0452095
17.2179	-0.25721	0.054347	-0.19976	0.0048745	-0.094605	0.21585	-0.454772	0.123314	-0.213873	-0.038454	0.0192567	0.0192567	0.423377	-0.330019	0.0130521	-0.0805001	0.101134	0.040549	0.315559	-0.248812		-0.0293718	0.210414	0.0459161
17.3162	-0.26075	0.0562507	-0.181081	0.0131574	-0.099729	0.235455	-0.45286	0.134204	-0.208951	-0.0345275	0.0171313	0.0171313	0.427208	-0.344386	0.0129124	-0.077198	0.0738749	0.0378373	0.322215	-0.253403		-0.0282754	0.212627	0.046399
17.4146	-0.263624	0.0601401	-0.161114	0.0209237	-0.108344	0.253422	-0.451191	0.146629	-0.201093	-0.0316636	0.0188278	0.0188278	0.427639	-0.353298	0.0124904	-0.0719292	0.0471923	0.0336334	0.327541	-0.254751		-0.026487	0.214152	0.0467319
17.5129	-0.266752	0.0560389	-0.142201	0.0266373	-0.113217	0.266912	-0.450121	0.153856	-0.193971	-0.0259988	0.0159841	0.0159841	0.426562	-0.364791	0.0141611	-0.0645736	0.0174522	0.02337	0.333129	-0.252344		-0.0261941	0.215123	0.0469437
17.6112	-0.268601	0.049304	-0.122835	0.0357697	-0.121484	0.278793	-0.450228	0.160213	-0.186616	-0.0204336	0.012992	0.012992	0.42166	-0.372884	0.0130792	-0.0545682	-0.00678997	0.0153639	0.339359	-0.24756		-0.0256237	0.215751	0.0470808
17.7095	-0.267701	0.0423109	-0.114428	0.043091	-0.124424	0.287899	-0.452143	0.168899	-0.173253	-0.0130557	0.0134056	0.0134056	0.416065	-0.381619	0.0128409	-0.0463053	-0.0283355	0.00787235	0.343875	-0.240633		-0.0246117	0.21636	0.0472137
17.8078	-0.264469	0.0330353	-0.109921	0.0490486	-0.132433	0.2973	-0.449964	0.1852	-0.158137	-0.00406219	0.0106241	0.0106241	0.403855	-0.385823	0.0130148	-0.0352388	-0.0497419	-0.00443409	0.345347	-0.231875		-0.0239026	0.215747	0.0470798
17.9061	-0.262574	0.0222763	-0.103043	0.0523448	-0.14574	0.302471	-0.44689	0.200915	-0.146967	0.00186788	0.00562627	0.00562627	0.387625	-0.385819	0.013168	-0.0241756	-0.0713056	-0.0146842	0.345914	-0.220895		-0.0242129	0.214379	0.0467813
18.0044	-0.261605	0.0148125	-0.0991606	0.0577664	-0.1531	0.306199	-0.442485	0.22073	-0.141892	0.00491064	0.00213202	0.00213202	0.371901	-0.381536	0.0138189	-0.010826	-0.0907996	-0.0225512	0.343941	-0.202566		-0.0234089	0.212722	0.0464198
18.1027	-0.256368	0.0112474	-0.0905391	0.0669417	-0.161229	0.311558	-0.431612	0.238719	-0.13179	0.00963696	0.00138966	0.00138966	0.35092	-0.377392	0.01208	0.00207171	-0.104035	-0.0308267	0.343962	-0.184433		-0.0209155	0.210167	0.0458622
18.201	-0.250735	0.00835836	-0.0741327	0.0769517	-0.174596	0.318189	-0.423241	0.248401	-0.124231	0.0123786	0.000104636	0.000104636	0.325862	-0.37211	0.00642673	0.0121171	-0.114296	-0.0356085	0.34011	-0.165124		-0.0192534	0.207027	0.045177
18.2993	-0.239798	0.00537962	-0.0547898	0.0865394	-0.193378	0.321686	-0.418085	0.257188	-0.116908	0.0151844	0.00528016	0.00528016	0.30205	-0.359836	0.00205585	0.0204433	-0.121296	-0.037549	0.33545	-0.146674		-0.0165889	0.203665	0.0444434
18.3976	-0.225509	0.0016102	-0.0311858	0.0930025	-0.212191	0.326801	-0.407497	0.266154	-0.111126	0.0195523	0.0125236	0.0125236	0.274124	-0.346338	-0.00455351	0.0292638	-0.123515	-0.039861	0.324236	-0.123435		-0.013271	0.198985	0.043422
18.4959	-0.213506	-0.00388513	-0.0100344	0.0902808	-0.231221	0.328988	-0.399644	0.279734	-0.107868	0.0246699	0.0203795	0.0203795	0.245198	-0.329766	-0.00877378	0.0368191	-0.124132	-0.0411938	0.306993	-0.10159		-0.0109086	0.194445	0.0424315
18.5942	-0.202694	-0.00861135	0.00671483	0.0833991	-0.249131	0.33237	-0.390985	0.295323	-0.100918	0.0229413	0.0276957	0.0276957	0.220793	-0.311333	-0.00735558	0.0437177	-0.127668	-0.0381693	0.293232	-0.0812243		-0.00821034	0.191005	0.0416807
18.6925	-0.195905	-0.0114317	0.0219142	0.0750199	-0.262993	0.336549	-0.376549	0.312569	-0.0933333	0.0230764	0.0381758	0.0381758	0.196754	-0.288783	-0.0124138	0.0524406	-0.129694	-0.0317417	0.27828	-0.0588803		-0.00443847	0.187356	0.0408845
18.7908	-0.184605	-0.0142279	0.0375749	0.0615355	-0.27431	0.339846	-0.360049	0.328326	-0.0845935	0.0242464	0.0476584	0.0476584	0.173294	-0.267842	-0.0193445	0.0604595	-0.129376	-0.0273003	0.259417	-0.0369221		-0.000927738	0.183285	0.0399961
18.8891	-0.171448	-0.0180592	0.0533838	0.0542054	-0.293162	0.344321	-0.349636	0.34011	-0.0759202	0.0253767	0.0579433	0.0579433	0.156168	-0.245453	-0.0296346	0.069999	-0.127363	-0.0221663	0.243083	-0.0159413		0.00268748	0.181298	0.0395624
18.9874	-0.159699	-0.0147979	0.0646373	0.0455863	-0.309305	0.352211	-0.33882	0.354786	-0.0704093	0.0253931	0.067873	0.067873	0.143467	-0.221519	-0.0409127	0.0775927	-0.123946	-0.016946	0.225916	0.00214404		0.00655628	0.180329	0.039351
19.0857	-0.144731	-0.008797	0.0716407	0.040268	-0.320245	0.357548	-0.333961	0.367059	-0.0647638	0.0237013	0.0789859	0.0789859	0.135504	-0.202132	-0.0464639	0.0786198	-0.120153	-0.0119542	0.205281	0.0266371		0.0105515	0.179504	0.039171
19.184	-0.126731	-0.00526993	0.0760852	0.0368825	-0.326047	0.359997	-0.327658	0.376233	-0.0570364	0.020057	0.0879697	0.0879697	0.1318	-0.182002	-0.0545526	0.0789393	-0.116434	-0.00702741	0.185203	0.0490188		0.0143699	0.177914	0.038824
19.2823	-0.108859	0.000247516	0.0853917	0.0334552	-0.326516	0.358112	-0.31724	0.385876	-0.052837	0.0226226	0.097619	0.097619	0.131939	-0.16133	-0.0619521	0.0772499	-0.105593	0.00040892	0.165418	0.0692407		0.0195435	0.17549	0.038295
19.3806	-0.0874801	0.00733163	0.0932002	0.029779	-0.326314	0.357508	-0.305521	0.388597	-0.053761	0.022945	0.10485	0.10485	0.131891	-0.143961	-0.0700583	0.0737349	-0.0919302	0.00997484	0.146674	0.0844976		0.0238404	0.172573	0.0376585
19.4789	-0.0705445	0.0121738	0.0944592	0.0262209	-0.322203	0.356007	-0.292312	0.391078	-0.0570361	0.0267523	0.108777	0.108777	0.128259	-0.126339	-0.0802409	0.0690471	-0.078407	0.0220066	0.126101	0.0959276		0.0269253	0.16914	0.0369094
19.5772	-0.0543711	0.021275	0.0928791	0.0209126	-0.31789	0.35615	-0.278014	0.395181	-0.0572991	0.0312345	0.117032	0.117032	0.127173	-0.10385	-0.0912557	0.0620165	-0.0662056	0.0381638	0.103075	0.102701		0.0307969	0.166231	0.0362746
19.6755	-0.0415131	0.0292595	0.0892208	0.0110772	-0.310769	0.354728	-0.261597	0.395326	-0.0559996	0.0355057	0.123805	0.123805	0.129357	-0.0836672	-0.0966078	0.0540426	-0.0579966	0.0514203	0.0795394	0.107639		0.0338287	0.162767	0.0355186
19.7738	-0.0303535	0.0379315	0.0931289	0.00302669	-0.307439	0.351917	-0.243035	0.3941	-0.0557143	0.04465	0.129891	0.129891	0.131026	-0.0649297	-0.101793	0.0495732	-0.0509918	0.0698241	0.0574303	0.109621		0.0373878	0.159948	0.0349035
19.8722	-0.0196256	0.0471357	0.096382	-0.00371398	-0.299235	0.346782	-0.227789	0.38933	-0.0570712	0.053623	0.138781	0.138781	0.137124	-0.0469378	-0.107616	0.0415708	-0.0406108	0.0931571	0.0359023	0.114089		0.0415029	0.157214	0.034307
19.9705	-0.0115006	0.0577453	0.0977455	-0.0115561	-0.285468	0.341207	-0.213933	0.384751	-0.0566364	0.0604389	0.14881	0.14881	0.146217	-0.0343332	-0.110148	0.0334973	-0.029737	0.118036	0.0161182	0.116936		0.04585	0.154683	0.0337547
20.0688	-0.00490206	0.0625761	0.100745	-0.0223973	-0.275828	0.329305	-0.199907	0.380501	-0.052072	0.0677243	0.158271	0.158271	0.157624	-0.0264041	-0.111055	0.0239004	-0.0205163	0.140729	-0.00172559	0.113719		0.048928	0.152477	0.0332732
20.1671	-0.00512209	0.0642124	0.0921927	-0.0364827	-0.264327	0.315946	-0.190251	0.381028	-0.0510439	0.0716289	0.164801	0.164801	0.171958	-0.0178009	-0.113334	0.0131296	-0.0141987	0.160479	-0.0221561	0.108085		0.0496772	0.151456	0.0330504
20.2654	-0.00339537	0.0645776	0.0776357	-0.0509576	-0.246317	0.301056	-0.179294	0.382158	-0.0490551	0.0799475	0.174712	0.174712	0.189709	-0.0120582	-0.111459	-7.00829e-05	-0.00931017	0.180849	-0.0439695	0.0972869		0.0508379	0.150534	0.0328492
20.3637	-0.00407608	0.0641721	0.0598752	-0.0646747	-0.220229	0.284807	-0.16833	0.378125	-0.0494595	0.083439	0.181521	0.181521	0.205508	-0.0104552	-0.111329	-0.0135054	-0.00604795	0.194233	-0.0643881	0.0828065		0.0501756	0.148572	0.0324211
20.462	-0.00901198	0.0662655	0.0367672	-0.0779688	-0.202018	0.266697	-0.162448	0.371994	-0.0496279	0.0840283	0.186188	0.186188	0.21972	-0.00801536	-0.11356	-0.0248575	-0.00439199	0.206606	-0.0796162	0.0685757		0.0480757	0.147791	0.0322506
20.5603	-0.00979914	0.0687883	0.0133843	-0.0857211	-0.18415	0.24916	-0.155427	0.361493	-0.0475952	0.0834093	0.189418	0.189418	0.234873	-0.0154089	-0.117838	-0.0335415	-0.00107309	0.217507	-0.0890873	0.0540395		0.0460924	0.146672	0.0320064
20.6586	-0.0116776	0.0677083	-0.0088941	-0.0931814	-0.170071	0.230426	-0.151268	0.350157	-0.0493966	0.0894141	0.193384	0.193384	0.249212	-0.0252476	-0.127221	-0.0419897	0.00412265	0.226784	-0.102346	0.0359119		0.0429604	0.147176	0.0321165
20.7569	-0.0101452	0.0642079	-0.0303419	-0.10172	-0.151981	0.208177	-0.152505	0.337613	-0.0539112	0.0929195	0.198479	0.198479	0.263303	-0.0400224	-0.129055	-0.0532974	0.00301873	0.237114	-0.112124	0.0152676		0.0391738	0.148032	0.0323032
20.8552	-0.00976388	0.0606073	-0.0497463	-0.106111	-0.136898	0.189544	-0.156255	0.3212	-0.0618961	0.0929052	0.207869	0.207869	0.272877	-0.0556494	-0.130106	-0.0646402	0.000210403	0.247589	-0.120263	-0.0052676		0.0352037	0.149718	0.0326711
20.9535	-0.0120339	0.0598605	-0.0702992	-0.113491	-0.12356	0.169807	-0.156394	0.303347	-0.0736739	0.092858	0.215467	0.215467	0.273492	-0.0689272	-0.134512	-0.0760998	-0.00490403	0.253029	-0.130199	-0.0255461		0.0296843	0.151079	0.0329681
21.0518	-0.0167262	0.0525692	-0.0870998	-0.117325	-0.112053	0.146867	-0.157854	0.283535	-0.0857102	0.0909329	0.220924	0.220924	0.270508	-0.0829724	-0.138135	-0.0828762	-0.00903183	0.259941	-0.135808	-0.0420911		0.023926	0.151573	0.0330759
21.1501	-0.0255633	0.0460214	-0.0976144	-0.125608	-0.103198	0.124679	-0.15437	0.264365	-0.0993557	0.0856726	0.22522	0.22522	0.262961	-0.0912133	-0.142674	-0.0869754	-0.0109719	0.270018	-0.139047	-0.0599872		0.0183789	0.151863	0.0331392
21.2484	-0.0387417	0.0405293	-0.104964	-0.132935	-0.0979856	0.110427	-0.154398	0.242847	-0.117309	0.0832115	0.232671	0.232671	0.250274	-0.0984368	-0.144682	-0.0921042	-0.0122488	0.279222	-0.142968	-0.0758756		0.0129602	0.152986	0.0333842
21.3467	-0.0515197	0.0330371	-0.116703	-0.140151	-0.0930005	0.103595	-0.160885	0.21988	-0.131195	0.0794597	0.239868	0.239868	0.237155	-0.104428	-0.148497	-0.097325	-0.0175047	0.287593	-0.146386	-0.0914925		0.00706852	0.154872	0.0337959
21.445	-0.0677714	0.0215329	-0.128555	-0.146687	-0.0863528	0.0989428	-0.169623	0.200604	-0.144931	0.0813603	0.248317	0.248317	0.22582	-0.112509	-0.148666	-0.101754	-0.0258421	0.297329	-0.149846	-0.103349		0.00181686	0.157885	0.0344534
21.5433	-0.080523	0.0109962	-0.137657	-0.154727	-0.0772655	0.0961709	-0.181441	0.183716	-0.162484	0.0788104	0.258596	0.258596	0.21945	-0.124361	-0.144611	-0.106628	-0.0348835	0.300734	-0.151604	-0.113408		-0.00312617	0.161393	0.0352189
21.6416	-0.0931479	-0.000848029	-0.145295	-0.163084	-0.0676035	0.0934703	-0.193989	0.167038	-0.180812	0.0727862	0.265253	0.265253	0.210311	-0.137148	-0.139296	-0.110538	-0.0410508	0.302435	-0.153376	-0.122158		-0.00859003	0.164122	0.0358143
21.7399	-0.103722	-0.0112583	-0.152446	-0.169749	-0.0569342	0.0924775	-0.205328	0.153571	-0.197498	0.0674319	0.273509	0.273509	0.198097	-0.149874	-0.138072	-0.116842	-0.0474088	0.308893	-0.153844	-0.130616		-0.0133052	0.167767	0.0366098
21.8382	-0.112001	-0.0230873	-0.158727	-0.178572	-0.0412134	0.0930193	-0.217382	0.138014	-0.218135	0.0567931	0.280458	0.280458	0.189746	-0.162031	-0.135428	-0.12755	-0.053305	0.309155	-0.152099	-0.137347		-0.0184617	0.171085	0.0373338
21.9365	-0.124309	-0.0346318	-0.161842	-0.189563	-0.0289558	0.0970362	-0.226327	0.119838	-0.238689	0.0445614	0.285504	0.285504	0.179134	-0.171542	-0.133417	-0.135508	-0.0603373	0.300922	-0.149847	-0.14911		-0.0245789	0.173361	0.0378305
22.0348	-0.135335	-0.0469703	-0.168451	-0.195069	-0.0173865	0.10286	-0.236437	0.100809	-0.259897	0.0371411	0.291789	0.291789	0.166944	-0.179759	-0.134194	-0.143804	-0.0656813	0.2911	-0.145709	-0.162128		-0.0304195	0.176074	0.0384224
22.1331	-0.14224	-0.057048	-0.175865	-0.203752	-0.0036312	0.116527	-0.251719	0.0786764	-0.279827	0.0260389	0.297188	0.297188	0.152603	-0.183773	-0.135279	-0.150576	-0.0695673	0.28086	-0.142675	-0.172742		-0.0359806	0.178991	0.0390591
22.2314	-0.145089	-0.0645506	-0.176291	-0.209808	0.00643187	0.131342	-0.265397	0.0537784	-0.297158	0.0188481	0.297255	0.297255	0.134014	-0.189501	-0.133934	-0.157502	-0.0745775	0.271056	-0.137336	-0.180063		-0.0410614	0.180212	0.0393255
22.3298	-0.150914	-0.0703106	-0.176964	-0.213804	0.0126009	0.147093	-0.279654	0.0332167	-0.314036	0.00862625	0.291153	0.291153	0.115942	-0.192119	-0.134806	-0.161048	-0.0796838	0.255357	-0.127308	-0.180826		-0.0463165	0.179737	0.0392217
22.4281	-0.158086	-0.0802598	-0.172362	-0.217047	0.0147325	0.166495	-0.290996	0.0162983	-0.330255	0.00393849	0.288991	0.288991	0.0998288	-0.193393	-0.132387	-0.165445	-0.0842597	0.239752	-0.118255	-0.179142		-0.050143	0.180261	0.0393363
22.5264	-0.165871	-0.0952514	-0.166381	-0.220712	0.0303681	0.187274	-0.298341	-0.00147258	-0.344057	-0.00414919	0.286721	0.286721	0.0860835	-0.195072	-0.124858	-0.1727	-0.0892496	0.22511	-0.111849	-0.18526		-0.0536473	0.181602	0.0396288
22.6247	-0.17754	-0.111706	-0.161676	-0.22444	0.0447113	0.212045	-0.303834	-0.0176482	-0.356381	-0.0132265	0.28428	0.28428	0.0736138	-0.187775	-0.119689	-0.180751	-0.0990159	0.213059	-0.103029	-0.189394		-0.0567058	0.18357	0.0400583
22.723	-0.19045	-0.12442	-0.158331	-0.224853	0.0628528	0.239398	-0.304246	-0.0300069	-0.366345	-0.0265394	0.284403	0.284403	0.0614015	-0.178177	-0.114454	-0.185273	-0.114	0.201238	-0.092626	-0.190446		-0.0583236	0.186016	0.0405921
22.8213	-0.208952	-0.136469	-0.152708	-0.223221	0.0740584	0.265778	-0.301287	-0.0428852	-0.373141	-0.0398667	0.283048	0.283048	0.0487816	-0.167643	-0.113521	-0.188434	-0.121335	0.184922	-0.0867846	-0.190494		-0.0603551	0.187615	0.0409409
22.9196	-0.22958	-0.146632	-0.148858	-0.222827	0.0845366	0.288662	-0.295851	-0.0534771	-0.374089	-0.0499895	0.276954	0.276954	0.0417347	-0.155196	-0.108657	-0.193788	-0.126179	0.167645	-0.080208	-0.186991		-0.0617918	0.188013	0.0410277
23.0179	-0.249123	-0.154551	-0.144113	-0.223447	0.103214	0.315614	-0.291921	-0.0605793	-0.368486	-0.0625026	0.27312	0.27312	0.0416933	-0.144127	-0.0964185	-0.200248	-0.127086	0.157423	-0.0722164	-0.183939		-0.0607287	0.190106	0.0414845
23.1162	-0.26597	-0.158722	-0.140937	-0.228984	0.123276	0.341968	-0.288752	-0.0627638	-0.358921	-0.0721056	0.272403	0.272403	0.0403854	-0.130682	-0.0826409	-0.210656	-0.132857	0.145922	-0.0665046	-0.183187		-0.0593663	0.193193	0.0421581
23.2145	-0.277384	-0.164469	-0.143975	-0.23183	0.144618	0.369935	-0.287931	-0.0643818	-0.350072	-0.0721431	0.272151	0.272151	0.04251	-0.119933	-0.0675485	-0.224554	-0.143246	0.132355	-0.0603812	-0.185496		-0.0579813	0.197383	0.0430725
23.3128	-0.282992	-0.172162	-0.150123	-0.237108	0.168744	0.390341	-0.283737	-0.0640957	-0.337629	-0.0738587	0.26865	0.26865	0.0513583	-0.113288	-0.0507089	-0.23652	-0.151323	0.122823	-0.0513135	-0.187591		-0.0560941	0.200573	0.0437687
23.4111	-0.290211	-0.176596	-0.155987	-0.244245	0.189839	0.402724	-0.274805	-0.06423	-0.328069	-0.0811202	0.264513	0.264513	0.0605579	-0.107994	-0.0336152	-0.24609	-0.158003	0.11216	-0.0406473	-0.189191		-0.0548248	0.202892	0.0442747
23.5094	-0.299672	-0.175943	-0.161979	-0.250744	0.20881	0.410841	-0.264289	-0.0630464	-0.317642	-0.0942867	0.260051	0.260051	0.0689411	-0.0991341	-0.0190893	-0.255786	-0.159387	0.0967575	-0.0267536	-0.193348		-0.0537825	0.204513	0.0446283
23.6077	-0.311278	-0.175656	-0.164295	-0.253238	0.224441	0.413355	-0.252938	-0.067403	-0.300997	-0.107748	0.253818	0.253818	0.0741019	-0.0886784	-0.00701555	-0.262616	-0.160891	0.0870464	-0.0116936	-0.20014		-0.0529003	0.204908	0.0447145
23.706	-0.32389	-0.1718	-0.165589	-0.25385	0.235269	0.414186	-0.240611	-0.0750772	-0.286991	-0.117986	0.249496	0.249496	0.0785546	-0.0773479	0.00180791	-0.267313	-0.166162	0.0743092	0.00849536	-0.208779		-0.0521891	0.205356	0.0448124
23.8043	-0.337592	-0.164827	-0.164889	-0.24983	0.241081	0.418124	-0.233797	-0.0821691	-0.276557	-0.127576	0.245855	0.245855	0.0875564	-0.0630278	0.0141495	-0.271905	-0.166152	0.0569906	0.0280432	-0.214154		-0.0507412	0.20622	0.0450008
23.9026	-0.353817	-0.157293	-0.165937	-0.241337	0.241754	0.421711	-0.228136	-0.0869157	-0.259806	-0.138455	0.24248	0.24248	0.0940235	-0.0488579	0.0285262	-0.27585	-0.166633	0.0424563	0.0446104	-0.21652		-0.0490758	0.206671	0.0450994
24.0009	-0.366941	-0.150813	-0.172058	-0.230976	0.239851	0.422633	-0.226326	-0.0883807	-0.241394	-0.148032	0.238315	0.238315	0.101099	-0.0380983	0.0471455	-0.281437	-0.169384	0.0351382	0.058578	-0.215574		-0.0474169	0.207034	0.0451785
24.0992	-0.37865	-0.144617	-0.174215	-0.223173	0.233499	0.42773	-0.223668	-0.0899815	-0.223599	-0.159679	0.232917	0.232917	0.109297	-0.028087	0.0660433	-0.284347	-0.17177	0.0261201	0.0706389	-0.21103		-0.0456827	0.20736	0.0452496
24.1975	-0.392552	-0.136415	-0.175203	-0.209868	0.225854	0.42841	-0.217747	-0.0899517	-0.21255	-0.166885	0.227085	0.227085	0.119866	-0.0227761	0.0839049	-0.284297	-0.176278	0.0205389	0.083278	-0.204646		-0.0436573	0.207196	0.0452139
24.2958	-0.403115	-0.126318	-0.177564	-0.198372	0.222002	0.427829	-0.212507	-0.0887932	-0.201989	-0.172307	0.227364	0.227364	0.134712	-0.0163569	0.0995082	-0.282564	-0.176879	0.0197581	0.0933285	-0.200312		-0.0402606	0.207946	0.0453776
24.3941	-0.412678	-0.119339	-0.175953	-0.191356	0.214994	0.42981	-0.204871	-0.0879902	-0.191015	-0.17908	0.232836	0.232836	0.146249	-0.0132663	0.116086	-0.27875	-0.177088	0.0297415	0.099405	-0.201286		-0.0365357	0.209579	0.0457338
24.4924	-0.421335	-0.10693	-0.181506	-0.18465	0.208206	0.428536	-0.197871	-0.0873544	-0.181348	-0.185821	0.233209	0.233209	0.155591	-0.0130846	0.13275	-0.273006	-0.176553	0.0428087	0.10425	-0.200491		-0.0335696	0.210241	0.0458784
24.5907	-0.426295	-0.0902746	-0.183293	-0.177792	0.191951	0.425602	-0.193545	-0.0834854	-0.172949	-0.180729	0.234293	0.234293	0.161732	-0.0122153	0.14795	-0.266072	-0.173102	0.0539737	0.110796	-0.191685		-0.0295424	0.20896	0.0455988
24.689	-0.427229	-0.0725472	-0.180858	-0.172099	0.177846	0.418897	-0.191009	-0.081581	-0.165418	-0.174521	0.236096	0.236096	0.163162	-0.0147196	0.168636	-0.259686	-0.166689	0.0648571	0.111586	-0.186212		-0.0257696	0.207149	0.0452036
24.7874	-0.423299	-0.0571844	-0.176841	-0.164967	0.159017	0.412097	-0.193583	-0.0859516	-0.158137	-0.168167	0.232018	0.232018	0.16541	-0.0206273	0.193925	-0.258387	-0.153758	0.0742505	0.11289	-0.177539		-0.0228407	0.204573	0.0446415
24.8857	-0.412569	-0.0424678	-0.173912	-0.156848	0.144085	0.408863	-0.19777	-0.0872622	-0.150178	-0.163122	0.223944	0.223944	0.167332	-0.0248222	0.221962	-0.253571	-0.142617	0.0843092	0.118252	-0.166707		-0.0189578	0.201891	0.0440563
24.984	-0.400493	-0.0284303	-0.169477	-0.149178	0.131458	0.408097	-0.202946	-0.0873925	-0.145479	-0.15846	0.216915	0.216915	0.168678	-0.0320948	0.249807	-0.244845	-0.132576	0.0949836	0.123302	-0.163747		-0.015248	0.200126	0.043671
25.0823	-0.38682	-0.0193901	-0.162491	-0.137998	0.111196	0.40276	-0.210748	-0.0922243	-0.144407	-0.152152	0.207546	0.207546	0.168944	-0.044224	0.275755	-0.232884	-0.125678	0.104354	0.128107	-0.163078		-0.0132943	0.197489	0.0430956
25.1806	-0.372377	-0.0155349	-0.155909	-0.124832	0.0914387	0.400025	-0.214538	-0.103434	-0.144076	-0.150858	0.196444	0.196444	0.172175	-0.0551889	0.296247	-0.2179	-0.114455	0.115809	0.131349	-0.162444		-0.0115807	0.194936	0.0425386
25.2789	-0.361734	-0.0114347	-0.148017	-0.110138	0.0701428	0.394642	-0.217842	-0.114577	-0.142304	-0.154521	0.187392	0.187392	0.172297	-0.0650721	0.314607	-0.198132	-0.0997315	0.126824	0.133699	-0.162447		-0.00994763	0.192496	0.0420061
25.3772	-0.355152	-0.0042152	-0.139165	-0.0953528	0.0490158	0.392578	-0.223557	-0.123263	-0.141467	-0.159988	0.176988	0.176988	0.166539	-0.071098	0.333532	-0.176913	-0.0882684	0.136006	0.135556	-0.163687		-0.00874622	0.191026	0.0416853
25.4755	-0.345641	-0.00509478	-0.127432	-0.0796254	0.0265733	0.39403	-0.22963	-0.130623	-0.142885	-0.158561	0.163487	0.163487	0.160489	-0.0746962	0.355388	-0.154753	-0.0791976	0.142695	0.138791	-0.166679		-0.00749381	0.189866	0.0414323
25.5738	-0.330455	-0.00940143	-0.113685	-0.066312	0.00760631	0.398304	-0.237788	-0.142147	-0.144078	-0.151006	0.147418	0.147418	0.157145	-0.0798	0.377063	-0.131458	-0.0735926	0.152145	0.136623	-0.168506		-0.00622548	0.189005	0.0412443
25.6721	-0.311395	-0.0166448	-0.0982186	-0.0585858	-0.0121506	0.407797	-0.246673	-0.149745	-0.145186	-0.1438	0.132413	0.132413	0.156199	-0.085449	0.397408	-0.110598	-0.06639	0.157942	0.131381	-0.164977		-0.00471296	0.188695	0.0411766
25.7704	-0.28887	-0.0291543	-0.0830177	-0.0498611	-0.0274225	0.419099	-0.25833	-0.151012	-0.143581	-0.138619	0.11728	0.11728	0.160543	-0.0931036	0.420203	-0.0921586	-0.0562041	0.167004	0.123341	-0.157402		-0.00219934	0.189393	0.041329
25.8687	-0.265348	-0.0461744	-0.0695787	-0.045808	-0.0394008	0.425644	-0.266073	-0.154265	-0.141135	-0.130822	0.0992619	0.0992619	0.159791	-0.105104	0.439946	-0.0699681	-0.0489628	0.179667	0.117448	-0.152383		-0.000700132	0.189769	0.0414111
25.967	-0.238112	-0.0670026	-0.0574523	-0.0453394	-0.0492874	0.433272	-0.272397	-0.158313	-0.144465	-0.119206	0.0807687	0.0807687	0.158556	-0.11906	0.454655	-0.043471	-0.0415096	0.190165	0.110773	-0.153013		1.65357e-05	0.19047	0.0415639
26.0653	-0.209801	-0.0855736	-0.0435583	-0.0427166	-0.0542983	0.438199	-0.278138	-0.163173	-0.151712	-0.107169	0.0642711	0.0642711	0.157229	-0.132855	0.463361	-0.0176512	-0.0336494	0.199758	0.108743	-0.153778		0.00108785	0.191135	0.041709
26.1636	-0.183857	-0.103737	-0.0300669	-0.0426934	-0.0531959	0.435468	-0.282609	-0.163215	-0.157528	-0.0981328	0.0449327	0.0449327	0.155731	-0.145454	0.472038	0.00509031	-0.0300341	0.211053	0.107501	-0.155972		0.00151259	0.191609	0.0418126
26.2619	-0.160274	-0.124828	-0.0162678	-0.0439659	-0.0497718	0.431939	-0.284894	-0.163202	-0.161059	-0.0901213	0.0261915	0.0261915	0.151792	-0.156795	0.480807	0.0235189	-0.0251404	0.218292	0.103302	-0.16019		0.0012763	0.192313	0.0419662
26.3602	-0.141446	-0.150072	-0.00316605	-0.0428905	-0.0532783	0.430027	-0.28788	-0.16256	-0.166102	-0.0890748	0.00711775	0.00711775	0.145928	-0.169396	0.490679	0.0401503	-0.0201044	0.221432	0.102265	-0.164295		-0.000277427	0.194463	0.0424354
26.4585	-0.123161	-0.172568	0.00457049	-0.0390887	-0.0506699	0.425861	-0.292031	-0.1642	-0.170744	-0.0874043	-0.0137601	-0.0137601	0.142858	-0.179424	0.500777	0.0523445	-0.0153599	0.215713	0.106042	-0.165701		-0.00198525	0.196386	0.0428549
26.5568	-0.103806	-0.19814	0.0189583	-0.0340223	-0.0485074	0.424244	-0.300567	-0.167849	-0.175392	-0.090978	-0.0324543	-0.0324543	0.143159	-0.188034	0.504703	0.0656013	-0.0117699	0.209198	0.112868	-0.166459		-0.0035851	0.199063	0.0434391
26.6551	-0.087653	-0.226851	0.0273047	-0.0236704	-0.0439218	0.420601	-0.30791	-0.173268	-0.177789	-0.106398	-0.0515032	-0.0515032	0.145009	-0.198168	0.504818	0.0803303	-0.0115234	0.204503	0.118873	-0.170899		-0.00648101	0.202286	0.0441424
26.7534	-0.0727272	-0.254069	0.0319136	-0.0120705	-0.0394967	0.419975	-0.313829	-0.175133	-0.182926	-0.120118	-0.0679343	-0.0679343	0.154874	-0.206652	0.500939	0.0939606	-0.0125552	0.198768	0.13044	-0.174813		-0.00846945	0.205851	0.0449203
26.8517	-0.0597497	-0.28114	0.0347675	-0.0030567	-0.0282559	0.415617	-0.319384	-0.173642	-0.189924	-0.132416	-0.0776488	-0.0776488	0.162361	-0.211856	0.493365	0.108385	-0.0167042	0.196582	0.143796	-0.18016		-0.00983563	0.208771	0.0455576
26.95	-0.0512025	-0.308963	0.0357974	-0.000197943	-0.0168752	0.407201	-0.323072	-0.177554	-0.199081	-0.141689	-0.0803649	-0.0803649	0.168466	-0.216467	0.483701	0.117139	-0.0206054	0.194182	0.154328	-0.185199		-0.012041	0.210981	0.0460398
27.0483	-0.041835	-0.336461	0.0339607	0.00147972	-0.00871088	0.399083	-0.32817	-0.18386	-0.207404	-0.152892	-0.0813601	-0.0813601	0.170469	-0.220229	0.469813	0.121868	-0.0256612	0.189382	0.162118	-0.185243		-0.0152507	0.21239	0.0463473
27.1466	-0.0349217	-0.363958	0.028214	0.00104291	0.004564	0.391851	-0.332476	-0.186916	-0.216883	-0.165025	-0.0782799	-0.0782799	0.171669	-0.219288	0.45282	0.123897	-0.0276964	0.182206	0.167046	-0.182483		-0.0181449	0.212908	0.0464603
27.245	-0.0308018	-0.388311	0.0231509	-0.000647512	0.0146897	0.383641	-0.341094	-0.18402	-0.228918	-0.169971	-0.073986	-0.073986	0.172744	-0.222807	0.441002	0.125344	-0.0323266	0.174704	0.174631	-0.179009		-0.0207986	0.214155	0.0467325
27.3433	-0.0263491	-0.411871	0.0211217	-0.0050975	0.0252842	0.379648	-0.351952	-0.181515	-0.237249	-0.175637	-0.0736026	-0.0736026	0.174534	-0.22973	0.428711	0.126023	-0.03639	0.166344	0.182766	-0.173061		-0.0235812	0.21616	0.04717
27.4416	-0.0212569	-0.436127	0.0207724	-0.00743747	0.0346164	0.375881	-0.36307	-0.184667	-0.245073	-0.178883	-0.0686728	-0.0686728	0.178705	-0.236328	0.410526	0.123742	-0.0394784	0.153424	0.187232	-0.168002		-0.0266385	0.217584	0.0474808
27.5399	-0.0199572	-0.452974	0.0168117	-0.00979552	0.0470142	0.370666	-0.379207	-0.185867	-0.245467	-0.185289	-0.0590916	-0.0590916	0.181878	-0.245566	0.386383	0.117821	-0.0408623	0.140929	0.18803	-0.160163		-0.0296899	0.217594	0.0474829
27.6382	-0.0239564	-0.465678	0.0118854	-0.00937859	0.0552567	0.364616	-0.392836	-0.180685	-0.248132	-0.194611	-0.0473738	-0.0473738	0.181783	-0.255226	0.362876	0.114608	-0.0431111	0.124621	0.191279	-0.154143		-0.032779	0.217233	0.0474041
27.7365	-0.0338571	-0.473794	-0.000217547	-0.00508482	0.0701529	0.358641	-0.402009	-0.175899	-0.255147	-0.199115	-0.0347503	-0.0347503	0.184192	-0.265523	0.341622	0.111632	-0.0465642	0.109899	0.196191	-0.153919		-0.0354151	0.217238	0.0474053
27.8348	-0.0471243	-0.478222	-0.0117423	-0.00401091	0.0849077	0.352015	-0.405752	-0.176125	-0.260885	-0.20173	-0.0195853	-0.0195853	0.186137	-0.276915	0.320765	0.109975	-0.0531632	0.0913655	0.194733	-0.15523		-0.0385085	0.216474	0.0472385
27.9331	-0.062577	-0.479933	-0.023541	-0.00404684	0.101431	0.344752	-0.407796	-0.177127	-0.264969	-0.210856	-0.00425925	-0.00425925	0.191188	-0.284157	0.300092	0.105975	-0.0616012	0.0692048	0.190736	-0.155901		-0.0418823	0.215536	0.0470337
28.0314	-0.0826996	-0.47505	-0.0328097	-0.00350073	0.116577	0.335072	-0.412846	-0.180699	-0.27062	-0.221058	0.0112731	0.0112731	0.197834	-0.28895	0.284434	0.0977426	-0.0730055	0.0478656	0.188733	-0.155139		-0.0452787	0.214977	0.0469119
28.1297	-0.10324	-0.470032	-0.0403067	-0.00699493	0.133174	0.329057	-0.416247	-0.184067	-0.269229	-0.230316	0.0280778	0.0280778	0.207005	-0.292973	0.273026	0.0916659	-0.0827286	0.022231	0.182793	-0.156397		-0.0478712	0.215004	0.0469177
28.228	-0.121778	-0.466898	-0.0490079	-0.00771188	0.14534	0.325725	-0.421476	-0.191812	-0.269168	-0.234228	0.05025	0.05025	0.216982	-0.293456	0.259749	0.0872557	-0.0900863	-0.00271772	0.174049	-0.161289		-0.0500014	0.215872	0.0471071
28.3263	-0.138811	-0.46288	-0.0598333	-0.0055823	0.154516	0.325108	-0.431789	-0.199653	-0.267276	-0.237952	0.0740575	0.0740575	0.229055	-0.291482	0.245731	0.0845474	-0.0979311	-0.0256073	0.167374	-0.167754		-0.0516052	0.217961	0.0475629
28.4246	-0.157978	-0.457135	-0.0680638	-0.00638132	0.172146	0.322479	-0.442469	-0.208736	-0.260535	-0.236943	0.0977079	0.0977079	0.242273	-0.287405	0.23145	0.0843464	-0.109167	-0.0481022	0.159136	-0.173896		-0.0524782	0.220385	0.048092
28.5229	-0.176362	-0.453584	-0.0707391	-0.00712563	0.185355	0.32043	-0.454949	-0.214953	-0.254005	-0.233114	0.123279	0.123279	0.252596	-0.284026	0.213882	0.0839365	-0.122236	-0.0685856	0.147605	-0.182863		-0.053609	0.223162	0.048698
28.6212	-0.197947	-0.449478	-0.0790067	-0.010217	0.197906	0.314598	-0.464148	-0.216309	-0.242576	-0.225315	0.149191	0.149191	0.259527	-0.278793	0.200956	0.0804354	-0.135694	-0.0915319	0.132889	-0.195943		-0.0551132	0.225397	0.0491856
28.7195	-0.218939	-0.442379	-0.0836493	-0.0231153	0.211	0.310696	-0.474102	-0.215778	-0.234161	-0.213531	0.172484	0.172484	0.269235	-0.271812	0.192325	0.077126	-0.147289	-0.115254	0.11726	-0.208586		-0.0562993	0.228214	0.0498003
28.8178	-0.241815	-0.437017	-0.0856386	-0.0385414	0.218341	0.304081	-0.48579	-0.21817	-0.219259	-0.202157	0.190972	0.190972	0.272368	-0.267709	0.186011	0.075707	-0.159095	-0.141282	0.0951718	-0.219678		-0.0591264	0.230515	0.0503025
28.9161	-0.267077	-0.429656	-0.0837519	-0.0528753	0.217722	0.298994	-0.494786	-0.219018	-0.200674	-0.191087	0.204796	0.204796	0.277581	-0.266458	0.178829	0.0761165	-0.168028	-0.171617	0.0695722	-0.23263		-0.0624625	0.232425	0.0507193
29.0144	-0.291497	-0.421117	-0.0786194	-0.0639197	0.21483	0.297533	-0.506369	-0.21415	-0.184638	-0.180356	0.216953	0.216953	0.287346	-0.266764	0.170102	0.0803352	-0.17961	-0.199095	0.0462606	-0.244167		-0.0649995	0.235431	0.0513753
29.1127	-0.316337	-0.41181	-0.0689576	-0.0720403	0.212451	0.29292	-0.519533	-0.209771	-0.167573	-0.167966	0.225443	0.225443	0.299366	-0.261707	0.160536	0.0890041	-0.19313	-0.223794	0.0277871	-0.255018		-0.0667344	0.238571	0.0520605
29.211	-0.341684	-0.401185	-0.0577516	-0.0813468	0.210812	0.290922	-0.530488	-0.205782	-0.149484	-0.152725	0.227017	0.227017	0.310133	-0.255781	0.151765	0.0990652	-0.209078	-0.246796	0.0122017	-0.264428		-0.0683799	0.241336	0.0526639
29.3093	-0.363665	-0.390734	-0.0478686	-0.0905494	0.213427	0.288929	-0.539815	-0.206225	-0.130301	-0.142005	0.228739	0.228739	0.320695	-0.249359	0.144226	0.107206	-0.225418	-0.272339	-0.005506	-0.27557		-0.0703697	0.244887	0.0534388
29.4076	-0.387076	-0.379137	-0.0413605	-0.100139	0.215331	0.28042	-0.546891	-0.207294	-0.119368	-0.133932	0.232308	0.232308	0.332683	-0.237546	0.136741	0.112512	-0.242255	-0.296431	-0.0234184	-0.287542		-0.0730043	0.24841	0.0542076
29.5059	-0.408889	-0.366959	-0.0401576	-0.109762	0.217145	0.271636	-0.553446	-0.201717	-0.114838	-0.127746	0.232708	0.232708	0.348058	-0.223659	0.135031	0.117596	-0.255918	-0.31789	-0.0393189	-0.295824		-0.0750622	0.251734	0.0549329
29.6042	-0.424838	-0.357745	-0.0363753	-0.117201	0.219422	0.265099	-0.555332	-0.198355	-0.114286	-0.118655	0.233706	0.233706	0.364599	-0.2088	0.138975	0.124078	-0.269463	-0.339193	-0.0553583	-0.304679		-0.0760347	0.255464	0.0557468
29.7026	-0.43936	-0.352167	-0.0319804	-0.124999	0.224594	0.259124	-0.556275	-0.198443	-0.108687	-0.107238	0.234953	0.234953	0.379816	-0.191079	0.144976	0.125108	-0.281319	-0.351651	-0.0683006	-0.307013		-0.0757494	0.258673	0.0564471
29.8009	-0.450605	-0.347419	-0.022703	-0.133972	0.218679	0.253413	-0.561703	-0.199075	-0.102791	-0.10201	0.234317	0.234317	0.391496	-0.172306	0.151903	0.123049	-0.291165	-0.364306	-0.0805039	-0.299577		-0.0760482	0.26071	0.0568917
29.8992	-0.459425	-0.343104	-0.0159907	-0.142569	0.210045	0.245708	-0.572132	-0.197546	-0.0999681	-0.0981658	0.232719	0.232719	0.398912	-0.151858	0.155839	0.117495	-0.294765	-0.372802	-0.0824826	-0.293274		-0.0765323	0.261724	0.0571129
29.9975	-0.464578	-0.339448	-0.0117911	-0.150626	0.199221	0.2404	-0.583664	-0.189487	-0.0966386	-0.0895102	0.234371	0.234371	0.402833	-0.134531	0.161209	0.109336	-0.297133	-0.37905	-0.0823608	-0.287475		-0.0762276	0.262549	0.0572929
30.0958	-0.46541	-0.340274	-0.0118124	-0.157872	0.188707	0.238241	-0.590935	-0.178762	-0.0864989	-0.0846653	0.236373	0.236373	0.406257	-0.120233	0.161207	0.101778	-0.294788	-0.383048	-0.0839477	-0.277689		-0.0753499	0.262437	0.0572684
30.1941	-0.469386	-0.342127	-0.0108009	-0.162944	0.175699	0.232325	-0.598943	-0.170077	-0.0812839	-0.0816143	0.236615	0.236615	0.408501	-0.106023	0.159241	0.0929139	-0.293959	-0.379522	-0.0826338	-0.265247		-0.0751325	0.261594	0.0570845
30.2924	-0.472979	-0.340996	-0.0104954	-0.170162	0.16251	0.227307	-0.604307	-0.160064	-0.0740802	-0.0803742	0.233252	0.233252	0.406927	-0.0973414	0.161354	0.0823422	-0.290427	-0.379838	-0.0794631	-0.248086		-0.0750833	0.259838	0.0567013
30.3907	-0.473746	-0.338451	-0.0107154	-0.181266	0.152419	0.219287	-0.605925	-0.151458	-0.06689	-0.0795546	0.225659	0.225659	0.405705	-0.0903369	0.165491	0.0682699	-0.286889	-0.378495	-0.0744354	-0.230751		-0.0753212	0.25707	0.0560972
30.489	-0.470255	-0.337863	-0.0110545	-0.192003	0.139166	0.211832	-0.607464	-0.146047	-0.0645757	-0.0796141	0.217904	0.217904	0.404692	-0.0812127	0.170786	0.0499099	-0.28312	-0.373639	-0.0702311	-0.210563		-0.0757723	0.253827	0.0553897
30.5873	-0.468188	-0.335758	-0.0143519	-0.203137	0.129705	0.203196	-0.606515	-0.143261	-0.0643105	-0.0803714	0.207201	0.207201	0.407	-0.0695875	0.178023	0.0322914	-0.27287	-0.367958	-0.0656827	-0.184507		-0.075594	0.25035	0.0546309
30.6856	-0.463594	-0.333017	-0.015003	-0.210866	0.125739	0.198831	-0.604332	-0.142053	-0.0703908	-0.0837653	0.195862	0.195862	0.412319	-0.0594497	0.186321	0.0177334	-0.259917	-0.35869	-0.060573	-0.153297		-0.0741141	0.247188	0.0539409
30.7839	-0.458618	-0.331735	-0.0126442	-0.211134	0.122441	0.198836	-0.601978	-0.141445	-0.0795726	-0.0878375	0.188266	0.188266	0.416528	-0.0501554	0.195105	0.000643735	-0.249424	-0.349832	-0.0554631	-0.119468		-0.071961	0.244889	0.0534393
30.8822	-0.45249	-0.327143	-0.0124223	-0.211259	0.124594	0.201564	-0.597565	-0.137766	-0.0948148	-0.0934324	0.18427	0.18427	0.419935	-0.0382421	0.204718	-0.0157243	-0.235064	-0.337987	-0.0470564	-0.0851776		-0.0683396	0.242891	0.0530031
30.9805	-0.442953	-0.323083	-0.0154016	-0.21532	0.130383	0.206799	-0.592959	-0.135325	-0.113794	-0.100459	0.183011	0.183011	0.422906	-0.0231042	0.217963	-0.0313226	-0.222516	-0.322005	-0.0368145	-0.0509868		-0.0640986	0.241842	0.0527742
31.0788	-0.433444	-0.31871	-0.0207057	-0.216318	0.137085	0.210335	-0.588301	-0.135349	-0.12933	-0.109323	0.175416	0.175416	0.422788	-0.0101821	0.233811	-0.0512156	-0.210575	-0.309626	-0.0297232	-0.0205962		-0.0614274	0.240472	0.0524753
31.1771	-0.425863	-0.31669	-0.0299308	-0.218871	0.146997	0.218462	-0.579213	-0.129237	-0.150592	-0.116865	0.174602	0.174602	0.421607	-0.005229	0.252914	-0.0744088	-0.192229	-0.294112	-0.0269088	0.00879696		-0.0581084	0.240134	0.0524016
31.2754	-0.417269	-0.313162	-0.0395822	-0.22083	0.150636	0.228226	-0.566657	-0.121055	-0.172537	-0.12473	0.179848	0.179848	0.424052	-0.000571777	0.274752	-0.0975189	-0.170887	-0.279875	-0.0248842	0.0378111		-0.0537193	0.240806	0.0525482
31.3737	-0.411626	-0.308579	-0.0474243	-0.21845	0.152357	0.234721	-0.554115	-0.113426	-0.195031	-0.131339	0.183121	0.183121	0.426872	0.00683752	0.289325	-0.11832	-0.149582	-0.261707	-0.0230178	0.069813		-0.0493225	0.241121	0.0526169
31.472	-0.404243	-0.304642	-0.0529286	-0.212981	0.155621	0.246417	-0.540357	-0.104703	-0.208647	-0.134948	0.18862	0.18862	0.430572	0.0122809	0.305719	-0.137054	-0.131724	-0.239837	-0.0206087	0.102088		-0.0431368	0.242019	0.0528129
31.5703	-0.399462	-0.300769	-0.0543819	-0.210117	0.156404	0.25687	-0.52424	-0.0994919	-0.214843	-0.135543	0.193469	0.193469	0.428456	0.0137528	0.31926	-0.15484	-0.119501	-0.216582	-0.0192549	0.130441		-0.0378452	0.242001	0.0528091
31.6686	-0.401132	-0.294289	-0.059846	-0.211963	0.15492	0.267237	-0.508766	-0.0943829	-0.226044	-0.139547	0.197964	0.197964	0.425007	0.0143632	0.328107	-0.171143	-0.107852	-0.190082	-0.0182049	0.156553		-0.0340567	0.242418	0.0528999
31.7669	-0.399982	-0.28504	-0.0672975	-0.215327	0.149542	0.277905	-0.498103	-0.0905547	-0.240851	-0.143927	0.202644	0.202644	0.42476	0.0133477	0.333372	-0.184149	-0.0979924	-0.169023	-0.0212534	0.178258		-0.0315514	0.243415	0.0531175
31.8652	-0.395826	-0.275613	-0.0788834	-0.218416	0.151696	0.289331	-0.485974	-0.0876259	-0.254798	-0.14079	0.206767	0.206767	0.425385	0.0140237	0.334016	-0.191351	-0.0940475	-0.146755	-0.0284056	0.190154		-0.0290173	0.243642	0.0531671
31.9635	-0.392404	-0.267191	-0.0873167	-0.2201	0.15638	0.303999	-0.472433	-0.08428	-0.270296	-0.138263	0.209283	0.209283	0.429894	0.0134299	0.33769	-0.195887	-0.093787	-0.12133	-0.0433508	0.201945		-0.0262368	0.244764	0.0534119
32.0618	-0.39032	-0.256939	-0.089757	-0.217144	0.158602	0.319315	-0.460067	-0.0912197	-0.289564	-0.135435	0.206857	0.206857	0.437009	0.0177635	0.339849	-0.196029	-0.0923103	-0.0955524	-0.0613609	0.212519		-0.0238463	0.245852	0.0536494
32.1602	-0.389264	-0.243661	-0.0859572	-0.216149	0.163472	0.33242	-0.448976	-0.0999832	-0.309437	-0.126181	0.201607	0.201607	0.444082	0.0252925	0.34429	-0.193702	-0.0934315	-0.0726509	-0.07724	0.219041		-0.0212411	0.246942	0.0538872
32.2585	-0.384337	-0.230405	-0.0802159	-0.215046	0.166863	0.346393	-0.439242	-0.105235	-0.331374	-0.116084	0.194809	0.194809	0.44848	0.0336629	0.349423	-0.19171	-0.0930317	-0.0539312	-0.0951129	0.226646		-0.0187319	0.248051	0.0541291
32.3568	-0.381695	-0.216945	-0.0697259	-0.210632	0.170799	0.357939	-0.435453	-0.110661	-0.356015	-0.108151	0.189472	0.189472	0.457326	0.0430279	0.352614	-0.187956	-0.0951061	-0.0331572	-0.112526	0.233346		-0.0162014	0.250405	0.0546429
32.4551	-0.380517	-0.204344	-0.0581214	-0.204255	0.169799	0.374757	-0.432226	-0.112244	-0.37918	-0.0997484	0.190427	0.190427	0.462177	0.0490103	0.3533	-0.178635	-0.0951989	-0.0159059	-0.131762	0.240966		-0.0130636	0.253048	0.0552195
32.5534	-0.379712	-0.187865	-0.0490795	-0.195456	0.16596	0.390741	-0.428643	-0.105259	-0.399726	-0.0915074	0.190231	0.190231	0.463977	0.0505098	0.352107	-0.164329	-0.0910449	-0.00184349	-0.150193	0.244991		-0.0097955	0.254304	0.0554937
32.6517	-0.378163	-0.171781	-0.0412784	-0.188843	0.157783	0.405906	-0.4233	-0.0994515	-0.416353	-0.0843367	0.190208	0.190208	0.461551	0.0484656	0.351341	-0.147035	-0.0953898	0.0121721	-0.169016	0.242418		-0.00774484	0.254681	0.055576
32.75	-0.377877	-0.153669	-0.0331541	-0.186633	0.139742	0.418525	-0.418371	-0.0995996	-0.428195	-0.0721795	0.191671	0.191671	0.455677	0.0460298	0.349194	-0.134811	-0.10226	0.0245773	-0.187681	0.238305		-0.00695186	0.254558	0.0555491
32.8483	-0.375576	-0.135195	-0.0291705	-0.188238	0.116858	0.42652	-0.411897	-0.100437	-0.43268	-0.0580236	0.191207	0.191207	0.445423	0.0393073	0.344061	-0.124698	-0.106974	0.0382779	-0.204856	0.231348		-0.00717684	0.252575	0.0551164
32.9466	-0.371816	-0.122476	-0.0234213	-0.186448	0.0923004	0.427758	-0.409739	-0.100259	-0.435627	-0.0455221	0.190321	0.190321	0.438662	0.0313199	0.334453	-0.115737	-0.116428	0.0515204	-0.221363	0.223518		-0.0084331	0.250468	0.0546567
33.0449	-0.370965	-0.109875	-0.0156343	-0.179813	0.0693445	0.42733	-0.409993	-0.100322	-0.435774	-0.0310843	0.186959	0.186959	0.430526	0.0207026	0.32205	-0.10853	-0.124252	0.064073	-0.237064	0.217029		-0.0099165	0.248069	0.0541332
33.1432	-0.368452	-0.0959465	-0.00846701	-0.176751	0.0477926	0.427887	-0.407105	-0.102676	-0.435475	-0.0162321	0.192965	0.192965	0.422442	0.0127772	0.309031	-0.0967569	-0.12759	0.0819542	-0.251744	0.21105		-0.00941662	0.246467	0.0537835
33.2415	-0.362487	-0.0788546	0.00131692	-0.170233	0.0246268	0.422391	-0.405697	-0.110206	-0.426902	-0.00299154	0.194012	0.194012	0.411738	0.00888673	0.296056	-0.0826806	-0.135211	0.094759	-0.264019	0.206488		-0.00924969	0.243092	0.053047
33.3398	-0.356176	-0.0614716	0.0109979	-0.160123	0.006378	0.410706	-0.409373	-0.118901	-0.41837	0.0104462	0.191025	0.191025	0.397489	0.00282669	0.28204	-0.0684091	-0.145671	0.110861	-0.275741	0.20069		-0.00998753	0.239272	0.0522135
33.4381	-0.349078	-0.0457741	0.0202129	-0.156226	-0.00991145	0.404723	-0.411535	-0.123747	-0.413227	0.022676	0.190997	0.190997	0.383706	-0.00628008	0.275071	-0.0557599	-0.15245	0.124564	-0.285587	0.191782		-0.0102423	0.236919	0.0517
33.5364	-0.341504	-0.0309037	0.0279879	-0.15581	-0.0275893	0.39793	-0.415495	-0.126815	-0.409833	0.0376974	0.190914	0.190914	0.367178	-0.0161056	0.268254	-0.0427441	-0.154846	0.131518	-0.295821	0.183786		-0.0110644	0.234705	0.0512168
33.6347	-0.334502	-0.0171901	0.0359713	-0.153979	-0.0406465	0.391782	-0.41953	-0.128048	-0.407959	0.0522362	0.193138	0.193138	0.350306	-0.0252855	0.261164	-0.0296452	-0.152766	0.138414	-0.304053	0.176158		-0.0110648	0.232859	0.050814
33.733	-0.323837	-0.00652216	0.0503876	-0.147053	-0.053207	0.38417	-0.425196	-0.127209	-0.39933	0.0675449	0.192429	0.192429	0.333464	-0.0367502	0.257499	-0.018117	-0.147908	0.143546	-0.308995	0.169966		-0.0101343	0.230058	0.0502027
33.8313	-0.314094	0.00226101	0.0657568	-0.139751	-0.061441	0.374759	-0.426049	-0.123426	-0.389474	0.0772044	0.189016	0.189016	0.312721	-0.0488656	0.255543	-0.0106668	-0.138927	0.149971	-0.311185	0.16112		-0.00932557	0.225947	0.0493056
33.9296	-0.306804	0.0110882	0.0827468	-0.133148	-0.0694662	0.361881	-0.425198	-0.119768	-0.375204	0.0816408	0.189185	0.189185	0.290783	-0.063095	0.255322	-0.00651065	-0.124625	0.154122	-0.308503	0.153841		-0.00812639	0.221286	0.0482885
34.0279	-0.30027	0.0217404	0.0987748	-0.126314	-0.0768429	0.346741	-0.427465	-0.117116	-0.358833	0.0904194	0.190973	0.190973	0.26644	-0.0773204	0.252789	0.000234592	-0.111307	0.150129	-0.304089	0.147401		-0.00714713	0.216538	0.0472525
34.1262	-0.294772	0.0302087	0.111142	-0.125046	-0.078949	0.328974	-0.429392	-0.106	-0.340104	0.0954376	0.195937	0.195937	0.239414	-0.0963856	0.250974	0.00437944	-0.098621	0.144836	-0.300449	0.143478		-0.0064501	0.211869	0.0462335
34.2245	-0.290357	0.035779	0.115179	-0.119804	-0.0867294	0.313015	-0.43169	-0.0884844	-0.325013	0.0947433	0.202501	0.202501	0.210047	-0.114948	0.248566	0.00531348	-0.0847097	0.142345	-0.29692	0.139879		-0.00643928	0.207726	0.0453294
34.3228	-0.286526	0.0398839	0.110651	-0.116249	-0.0933041	0.30619	-0.431105	-0.0723472	-0.305706	0.0940567	0.213443	0.213443	0.182992	-0.13205	0.248709	0.00803202	-0.0730042	0.13742	-0.289201	0.130302		-0.00571848	0.204136	0.044546
34.4211	-0.280916	0.0433306	0.100676	-0.118627	-0.0961469	0.302832	-0.423856	-0.0583868	-0.283346	0.0945229	0.224734	0.224734	0.153042	-0.14891	0.248489	0.0119945	-0.0615222	0.133943	-0.280806	0.118222		-0.00479988	0.200103	0.043666
34.5194	-0.276904	0.0472865	0.0941067	-0.121466	-0.0954075	0.294153	-0.416394	-0.0485684	-0.266029	0.0933278	0.231192	0.231192	0.127988	-0.160949	0.249816	0.0146318	-0.0515425	0.131532	-0.272289	0.106897		-0.00437122	0.196256	0.0428265
34.6178	-0.275437	0.0494209	0.0875692	-0.125364	-0.0905584	0.289804	-0.40968	-0.0507573	-0.253514	0.0920953	0.235327	0.235327	0.105064	-0.17288	0.253207	0.0119527	-0.0459374	0.129189	-0.2618	0.0976136		-0.00496796	0.193566	0.0422396
34.7161	-0.272275	0.0508527	0.0830309	-0.129108	-0.0826559	0.285999	-0.408151	-0.0502285	-0.245906	0.0909225	0.240887	0.240887	0.0868678	-0.182309	0.25786	0.0065164	-0.0348584	0.129229	-0.25216	0.0935112		-0.00455444	0.192348	0.0419738
34.8144	-0.266926	0.0500425	0.0765341	-0.131692	-0.068577	0.278921	-0.408385	-0.0409365	-0.243308	0.0855342	0.244203	0.244203	0.0698829	-0.188428	0.263745	0.0073091	-0.0235619	0.131209	-0.242035	0.0844296		-0.00389183	0.19064	0.0416011
34.9127	-0.263121	0.0490844	0.068008	-0.130007	-0.049059	0.271601	-0.410889	-0.0328282	-0.24402	0.0764488	0.247168	0.247168	0.0591481	-0.188252	0.269365	0.0121676	-0.0137741	0.134517	-0.23002	0.0757047		-0.00257945	0.189111	0.0412674
35.011	-0.261814	0.0509292	0.0582884	-0.128254	-0.0279859	0.271038	-0.408463	-0.0281332	-0.243702	0.0700603	0.248964	0.248964	0.0501173	-0.188655	0.278599	0.0171254	3.87401e-05	0.138388	-0.220555	0.0643836		-0.000533289	0.188292	0.0410887
35.1093	-0.260062	0.0525932	0.045832	-0.128669	-0.00894471	0.269128	-0.404594	-0.0210934	-0.243378	0.062045	0.249451	0.249451	0.0425396	-0.184885	0.289789	0.0219946	0.010482	0.139157	-0.212639	0.0516869		0.000994187	0.187221	0.040855
35.2076	-0.259567	0.0492698	0.0349947	-0.125036	0.0091636	0.266916	-0.404015	-0.00999603	-0.243812	0.0560971	0.244465	0.244465	0.0379658	-0.181786	0.30202	0.02658	0.0170902	0.136187	-0.200302	0.0368339		0.00187669	0.185754	0.0405349
35.3059	-0.26317	0.0426998	0.0216721	-0.125904	0.0252363	0.269697	-0.404545	0.00227142	-0.250218	0.0488243	0.239251	0.239251	0.0372109	-0.175401	0.315155	0.0280754	0.0220898	0.13674	-0.187255	0.0199379		0.00208088	0.185841	0.0405538
35.4042	-0.265302	0.0346947	0.0064589	-0.12984	0.0386784	0.279115	-0.403424	0.0136479	-0.254033	0.0402817	0.232764	0.232764	0.0342971	-0.169239	0.328775	0.027442	0.0259979	0.133258	-0.17381	0.00169866		0.00171131	0.186091	0.0406083
35.5025	-0.266141	0.0267658	-0.00605855	-0.129306	0.0479692	0.285934	-0.406514	0.0228627	-0.252405	0.032126	0.225345	0.225345	0.0300207	-0.160198	0.339719	0.0286246	0.0261978	0.129975	-0.161288	-0.0158553		0.00115587	0.185883	0.0405631
35.6008	-0.268794	0.0198125	-0.0184795	-0.125301	0.0573736	0.29396	-0.410385	0.0267822	-0.256124	0.0194417	0.213953	0.213953	0.0250905	-0.149338	0.349826	0.0290138	0.0256618	0.134374	-0.14833	-0.0351916		-0.000135128	0.186166	0.0406248
35.6991	-0.268859	0.014493	-0.034589	-0.121219	0.061897	0.30234	-0.415901	0.0254111	-0.262487	0.00542506	0.201294	0.201294	0.0242445	-0.139359	0.362442	0.0305534	0.0214178	0.136927	-0.135383	-0.0553715		-0.00227149	0.187085	0.0408254
35.7974	-0.272476	0.0105245	-0.0533107	-0.118698	0.0662865	0.313472	-0.417066	0.0190073	-0.268632	-0.00754478	0.189445	0.189445	0.0265574	-0.124602	0.373807	0.0329377	0.0151622	0.141919	-0.123044	-0.0769539		-0.00418816	0.188465	0.0411263
35.8957	-0.28073	0.00345193	-0.071633	-0.118132	0.0687426	0.327262	-0.420529	0.00678902	-0.275788	-0.0142873	0.180198	0.180198	0.0362145	-0.110579	0.385892	0.0396518	0.00426878	0.149251	-0.114119	-0.0964757		-0.00601769	0.191801	0.0418545
35.994	-0.293451	-0.00557003	-0.0889683	-0.115925	0.0683606	0.340742	-0.427876	-0.00383966	-0.287836	-0.0212577	0.170172	0.170172	0.0471295	-0.095351	0.398925	0.0473906	-0.00680613	0.158201	-0.108612	-0.112988		-0.00836943	0.196663	0.0429153
36.0923	-0.307354	-0.0165228	-0.109961	-0.112027	0.068221	0.357053	-0.428192	-0.0124299	-0.300339	-0.0335313	0.157769	0.157769	0.058583	-0.0797047	0.414262	0.0502883	-0.0169032	0.173749	-0.0992732	-0.129874		-0.0104209	0.201877	0.0440532
36.1906	-0.322657	-0.0279261	-0.131084	-0.104796	0.0673814	0.374369	-0.431885	-0.0229878	-0.311838	-0.0416345	0.150312	0.150312	0.0767615	-0.0638181	0.429575	0.0556871	-0.0281714	0.191569	-0.0871242	-0.146582		-0.0112269	0.20864	0.0455289
36.2889	-0.337799	-0.035555	-0.146026	-0.0996351	0.0704622	0.389507	-0.432872	-0.037223	-0.318712	-0.0460921	0.145886	0.145886	0.0953339	-0.0504022	0.445946	0.0631803	-0.0413828	0.20657	-0.0753991	-0.163061		-0.0110694	0.215294	0.046981
36.3872	-0.3569	-0.0399331	-0.156649	-0.0918193	0.0745104	0.393614	-0.433563	-0.0528043	-0.326594	-0.0525515	0.136088	0.136088	0.111808	-0.0400701	0.45667	0.0701722	-0.0541566	0.225204	-0.0705096	-0.175245		-0.012332	0.220627	0.0481447
36.4855	-0.375399	-0.0472863	-0.162199	-0.0799384	0.0767901	0.396801	-0.436441	-0.0650317	-0.335703	-0.056459	0.1266	0.1266	0.130749	-0.0271964	0.466335	0.0760133	-0.0660291	0.242948	-0.0676996	-0.185322		-0.0130935	0.226033	0.0493245
36.5838	-0.394475	-0.0571777	-0.170209	-0.0698951	0.0788705	0.402007	-0.439986	-0.0737453	-0.337498	-0.0574597	0.119269	0.119269	0.147548	-0.016324	0.478574	0.0810696	-0.081394	0.265601	-0.0637441	-0.196559		-0.013313	0.232294	0.0506908
36.6821	-0.408592	-0.0692846	-0.175754	-0.061177	0.0771243	0.400707	-0.440817	-0.0727281	-0.335829	-0.0612336	0.114351	0.114351	0.16621	-0.00472516	0.487204	0.0903988	-0.0979818	0.288939	-0.0625259	-0.210314		-0.0130838	0.237295	0.051782
36.7804	-0.421608	-0.0810744	-0.178849	-0.0477146	0.0745461	0.404405	-0.436512	-0.0697533	-0.33262	-0.0654484	0.111334	0.111334	0.180749	0.00435797	0.491607	0.1011	-0.11491	0.306168	-0.058428	-0.225737		-0.0123527	0.241419	0.0526819
36.8787	-0.438124	-0.0924884	-0.17828	-0.0329542	0.0726918	0.419204	-0.431193	-0.0721281	-0.324518	-0.067024	0.110528	0.110528	0.197532	0.0103565	0.493048	0.10825	-0.13044	0.321229	-0.0531547	-0.23742		-0.0107177	0.246049	0.0536922
36.977	-0.453582	-0.10385	-0.173959	-0.0221648	0.0696431	0.434713	-0.426646	-0.0716346	-0.316888	-0.0625262	0.111935	0.111935	0.208775	0.0166888	0.494281	0.116546	-0.142797	0.330612	-0.0530136	-0.248687		-0.00903103	0.250213	0.0546009
37.0754	-0.467892	-0.112139	-0.167572	-0.0151485	0.0666758	0.451248	-0.425647	-0.0731651	-0.310117	-0.0597876	0.114846	0.114846	0.215486	0.0235891	0.493539	0.127041	-0.156885	0.340406	-0.0512643	-0.253836		-0.00728886	0.254335	0.0555005
37.1737	-0.480661	-0.119953	-0.158484	-0.00593001	0.0660319	0.465927	-0.424452	-0.0800768	-0.305599	-0.0554192	0.120971	0.120971	0.221174	0.0230167	0.491645	0.137497	-0.168838	0.351911	-0.0476584	-0.257083		-0.00525056	0.258317	0.0563694
37.272	-0.492021	-0.12196	-0.148937	0.00154353	0.0667147	0.480233	-0.420321	-0.0888512	-0.301433	-0.0536686	0.127172	0.127172	0.220008	0.0211896	0.487461	0.145423	-0.179378	0.362113	-0.0480418	-0.256573		-0.0036078	0.26112	0.056981
37.3703	-0.501898	-0.123925	-0.13927	0.0129329	0.0705827	0.492931	-0.416548	-0.0971464	-0.297689	-0.0522412	0.133746	0.133746	0.221337	0.0153575	0.480366	0.157115	-0.186841	0.371461	-0.0506126	-0.255443		-0.00160204	0.263645	0.0575321
37.4686	-0.51455	-0.127588	-0.125613	0.0219859	0.0765588	0.499455	-0.413512	-0.105104	-0.295578	-0.0552224	0.14655	0.14655	0.226932	0.012331	0.470044	0.170501	-0.191117	0.381057	-0.0531137	-0.253435		0.000856576	0.266313	0.0581143
37.5669	-0.527968	-0.127734	-0.117511	0.0300171	0.0869952	0.508279	-0.405439	-0.113871	-0.294934	-0.0583983	0.157889	0.157889	0.231225	0.00759032	0.458417	0.181574	-0.197262	0.389703	-0.055402	-0.251431		0.00298138	0.268963	0.0586925
37.6652	-0.539382	-0.126939	-0.109695	0.036888	0.0976744	0.513122	-0.394244	-0.116861	-0.291887	-0.0602051	0.168615	0.168615	0.239731	-0.00253933	0.446954	0.194957	-0.204946	0.389695	-0.0586412	-0.247852		0.00515299	0.270324	0.0589895
37.7635	-0.551241	-0.126435	-0.0956552	0.0439767	0.114666	0.51646	-0.38367	-0.110449	-0.283007	-0.0623657	0.180835	0.180835	0.248917	-0.0115984	0.430867	0.207909	-0.206767	0.38926	-0.0638097	-0.241013		0.00888576	0.270687	0.0590687
37.8618	-0.558869	-0.123978	-0.0869077	0.0494568	0.131073	0.517363	-0.37909	-0.0995247	-0.276386	-0.0670244	0.194194	0.194194	0.255911	-0.0213913	0.414545	0.219375	-0.208063	0.385408	-0.0691915	-0.231191		0.0119952	0.270701	0.0590717
37.9601	-0.558182	-0.116668	-0.081312	0.0598364	0.147614	0.514316	-0.375495	-0.0825551	-0.268963	-0.0781172	0.207053	0.207053	0.256708	-0.0307048	0.397156	0.229843	-0.20656	0.374904	-0.0706551	-0.219673		0.0152799	0.268596	0.0586125
38.0584	-0.552565	-0.110945	-0.0746714	0.0670096	0.162861	0.51208	-0.371794	-0.0651996	-0.259022	-0.0884145	0.218884	0.218884	0.255729	-0.04354	0.378774	0.239262	-0.204917	0.363227	-0.0699916	-0.212027		0.0181813	0.265974	0.0580402
38.1567	-0.546195	-0.105103	-0.0615633	0.0694085	0.170448	0.5089	-0.371486	-0.0523312	-0.249402	-0.0969941	0.230611	0.230611	0.255414	-0.0569179	0.360557	0.252636	-0.202943	0.348751	-0.0734987	-0.207873		0.0201515	0.26366	0.0575354
38.255	-0.535655	-0.0957328	-0.044163	0.0714498	0.174504	0.508079	-0.362532	-0.0453395	-0.244332	-0.110264	0.234285	0.234285	0.250129	-0.0727039	0.34062	0.264245	-0.199506	0.332236	-0.076267	-0.205459		0.0208939	0.259812	0.0566956
38.3533	-0.523309	-0.0888514	-0.0277686	0.0734188	0.176853	0.508221	-0.360416	-0.0419262	-0.243964	-0.124893	0.23697	0.23697	0.244459	-0.0858542	0.322764	0.275254	-0.194595	0.316672	-0.0803221	-0.200851		0.0209416	0.256885	0.056057
38.4516	-0.506099	-0.0856629	-0.00911564	0.0738394	0.176959	0.511734	-0.361469	-0.0364764	-0.244651	-0.1373	0.244745	0.244745	0.242492	-0.0993025	0.308744	0.284233	-0.189097	0.299269	-0.0798526	-0.196383		0.0220676	0.254754	0.0555918
38.5499	-0.489729	-0.0808783	0.00555289	0.0752392	0.175592	0.515533	-0.362163	-0.0341562	-0.244955	-0.155107	0.249128	0.249128	0.236385	-0.114705	0.295577	0.291183	-0.184758	0.27959	-0.077459	-0.193586		0.0217707	0.252654	0.0551337
38.6482	-0.472225	-0.0711272	0.0190463	0.0781313	0.173679	0.519483	-0.364567	-0.037057	-0.249783	-0.172611	0.250107	0.250107	0.23079	-0.127791	0.279558	0.296464	-0.174583	0.254909	-0.0761045	-0.192079		0.0207173	0.250132	0.0545833
38.7465	-0.457458	-0.0578759	0.0290322	0.0812633	0.17603	0.527563	-0.371762	-0.0432795	-0.252245	-0.186915	0.253096	0.253096	0.221717	-0.138863	0.266185	0.300352	-0.159952	0.229082	-0.0754784	-0.190489		0.0201549	0.248753	0.0542824
38.8448	-0.446967	-0.0421421	0.0322588	0.0784705	0.181565	0.529318	-0.383005	-0.0508616	-0.254031	-0.201648	0.252439	0.252439	0.213858	-0.149999	0.255402	0.301712	-0.14749	0.209888	-0.0774476	-0.194103		0.017983	0.248126	0.0541455
38.9431	-0.435112	-0.0274508	0.0306998	0.0762119	0.187703	0.519521	-0.397324	-0.0556719	-0.260854	-0.215862	0.251822	0.251822	0.202994	-0.160162	0.24638	0.301739	-0.135556	0.190644	-0.0781063	-0.199155		0.0147142	0.246897	0.0538772
39.0414	-0.425308	-0.0152808	0.0274914	0.0757184	0.192199	0.50912	-0.407911	-0.0622624	-0.268639	-0.23441	0.251243	0.251243	0.193955	-0.174481	0.239392	0.301602	-0.126005	0.174585	-0.0763161	-0.204854		0.0110541	0.246518	0.0537946
39.1397	-0.416057	-0.00689824	0.0197543	0.0776742	0.195132	0.491728	-0.417062	-0.0648345	-0.279393	-0.25223	0.248214	0.248214	0.188414	-0.18808	0.236765	0.296282	-0.119467	0.15814	-0.072816	-0.21744		0.00630192	0.245792	0.0536363
39.238	-0.406008	-0.00102645	0.00882141	0.0761488	0.192329	0.479547	-0.430636	-0.0619379	-0.288086	-0.271985	0.243971	0.243971	0.1836	-0.196724	0.235483	0.293195	-0.110984	0.142211	-0.0728841	-0.231032		0.00139868	0.245763	0.0536298
39.3363	-0.399774	0.000519585	-0.00357553	0.0726797	0.186864	0.467983	-0.447627	-0.0565619	-0.295701	-0.288543	0.240173	0.240173	0.184062	-0.20157	0.236428	0.294203	-0.102468	0.126068	-0.0731356	-0.246515		-0.0033159	0.246772	0.05385
39.4346	-0.391076	0.00376745	-0.0160378	0.0650486	0.17951	0.452989	-0.463427	-0.0520852	-0.29619	-0.300248	0.238537	0.238537	0.180546	-0.208996	0.241442	0.29195	-0.0963929	0.107834	-0.0722945	-0.26194		-0.00792622	0.246711	0.0538368
39.533	-0.380179	0.00691446	-0.0294991	0.0607877	0.168902	0.441639	-0.479966	-0.0488922	-0.296253	-0.306641	0.230631	0.230631	0.175507	-0.219106	0.247676	0.289811	-0.0909741	0.0915401	-0.0714385	-0.276621		-0.0127765	0.246253	0.0537369
39.6313	-0.371397	0.00609668	-0.0391632	0.0542601	0.15293	0.425097	-0.499643	-0.0446851	-0.296481	-0.311692	0.221324	0.221324	0.172348	-0.229816	0.25811	0.29069	-0.0763439	0.0766863	-0.0694522	-0.289147		-0.0174477	0.245855	0.0536501
39.7296	-0.362658	0.000952067	-0.0463858	0.0455769	0.138569	0.410479	-0.521818	-0.0451274	-0.296771	-0.316452	0.216261	0.216261	0.165448	-0.234993	0.268885	0.286687	-0.0622514	0.0654981	-0.0668467	-0.302742		-0.0220714	0.246085	0.0537001
39.8279	-0.354272	-0.00655762	-0.0565268	0.0359399	0.119917	0.398308	-0.541653	-0.0500127	-0.303336	-0.320096	0.207981	0.207981	0.15362	-0.239644	0.284667	0.281569	-0.0560605	0.0594583	-0.063376	-0.31978		-0.0280937	0.246826	0.0538618
39.9262	-0.348921	-0.0149346	-0.0616024	0.0257664	0.103443	0.385369	-0.556115	-0.0556376	-0.309015	-0.319743	0.198369	0.198369	0.140151	-0.247168	0.301046	0.279369	-0.0514864	0.0537732	-0.0618227	-0.340021		-0.0340405	0.247552	0.0540202
40.0245	-0.348069	-0.0230534	-0.0634794	0.011667	0.086833	0.377534	-0.56745	-0.0644089	-0.314441	-0.313423	0.190062	0.190062	0.126154	-0.2522	0.316717	0.280201	-0.0455777	0.050846	-0.062266	-0.363287		-0.0393789	0.248925	0.0543198
40.1228	-0.344956	-0.026995	-0.0650667	0.000912668	0.0784823	0.370439	-0.576149	-0.0765928	-0.32377	-0.30817	0.181037	0.181037	0.11192	-0.252641	0.337668	0.282742	-0.0442209	0.0507916	-0.0635417	-0.382013		-0.0434544	0.250755	0.0547192
40.2211	-0.33979	-0.0306573	-0.0712987	-0.00684376	0.0794959	0.362432	-0.58634	-0.0838812	-0.330534	-0.303992	0.1728	0.1728	0.0956312	-0.250828	0.356812	0.285168	-0.0448602	0.0477301	-0.0616758	-0.39458		-0.0466206	0.252233	0.0550418
40.3194	-0.340052	-0.0380748	-0.0816675	-0.0177229	0.0839456	0.352572	-0.603285	-0.0830924	-0.330755	-0.297071	0.170523	0.170523	0.0802967	-0.243011	0.378129	0.288633	-0.0469786	0.0414193	-0.0623763	-0.40903		-0.0493537	0.254979	0.0556409
40.4177	-0.342987	-0.0462143	-0.0927933	-0.0281398	0.0912156	0.345012	-0.61431	-0.0801266	-0.332548	-0.289193	0.166279	0.166279	0.0698899	-0.240376	0.396805	0.291879	-0.0502007	0.0371738	-0.063926	-0.424151		-0.0520217	0.257772	0.0562504
40.516	-0.347505	-0.0507619	-0.104873	-0.0405824	0.0986807	0.340173	-0.623579	-0.0789045	-0.332538	-0.282904	0.159017	0.159017	0.056614	-0.235624	0.413356	0.299189	-0.0502895	0.0333302	-0.0666467	-0.440707		-0.054777	0.260682	0.0568854
40.6143	-0.353134	-0.0526754	-0.116022	-0.0574259	0.106685	0.3337	-0.63692	-0.0753783	-0.332669	-0.273762	0.153108	0.153108	0.0471757	-0.230547	0.428279	0.309084	-0.0507599	0.0333395	-0.0707246	-0.456366		-0.0570953	0.264284	0.0576714
40.7126	-0.357066	-0.0596429	-0.127794	-0.0743433	0.116233	0.327245	-0.648639	-0.0669595	-0.331506	-0.267949	0.149597	0.149597	0.037976	-0.230169	0.442015	0.319288	-0.0529655	0.0303496	-0.0754612	-0.466507		-0.0593351	0.267727	0.0584229
40.8109	-0.364237	-0.0676916	-0.136825	-0.0888374	0.123707	0.318262	-0.654015	-0.0565342	-0.333463	-0.262651	0.143716	0.143716	0.0296618	-0.231418	0.455729	0.331274	-0.057245	0.0273906	-0.0780741	-0.474271		-0.0615903	0.270549	0.0590386
40.9092	-0.367809	-0.0785644	-0.141198	-0.0971374	0.125621	0.308248	-0.656621	-0.0463509	-0.331914	-0.255319	0.140746	0.140746	0.0215647	-0.229845	0.470763	0.3471	-0.0611517	0.0211385	-0.0760084	-0.473717		-0.0619854	0.272288	0.0594181
41.0075	-0.368109	-0.0886469	-0.143868	-0.108273	0.12174	0.301104	-0.655337	-0.0368757	-0.323802	-0.252894	0.137117	0.137117	0.0176677	-0.232048	0.485241	0.366964	-0.0664577	0.016268	-0.0761821	-0.471431		-0.0620353	0.273728	0.0597324
41.1058	-0.367618	-0.0953756	-0.14696	-0.122078	0.118951	0.296347	-0.654303	-0.0290427	-0.313588	-0.251974	0.129477	0.129477	0.0133237	-0.234498	0.500246	0.383278	-0.072086	0.0127384	-0.0746005	-0.470832		-0.0624559	0.27513	0.0600383
41.2041	-0.366587	-0.101845	-0.145071	-0.135612	0.116869	0.296323	-0.651264	-0.0245284	-0.299131	-0.248529	0.123172	0.123172	0.00813061	-0.238326	0.508973	0.403586	-0.0742799	0.00866993	-0.0758859	-0.466372		-0.0619267	0.275948	0.0602169
41.3024	-0.369096	-0.106065	-0.140866	-0.148087	0.120442	0.291234	-0.641048	-0.0246854	-0.286132	-0.24521	0.118287	0.118287	0.00502134	-0.241804	0.512244	0.424365	-0.0808136	0.00170829	-0.0741276	-0.461104		-0.0613725	0.275717	0.0601664
41.4007	-0.368389	-0.107631	-0.136176	-0.161691	0.126035	0.285808	-0.629088	-0.0268374	-0.275123	-0.246085	0.113398	0.113398	-0.00131822	-0.250721	0.512898	0.441825	-0.0858927	-0.000709571	-0.072159	-0.453721		-0.061109	0.275036	0.0600177
41.499	-0.369587	-0.108415	-0.128496	-0.171628	0.132616	0.28671	-0.619678	-0.0296528	-0.270282	-0.248747	0.10522	0.10522	-0.00549422	-0.254844	0.509224	0.460257	-0.0872939	-0.00392884	-0.0701042	-0.445172		-0.0607039	0.2747	0.0599446
41.5973	-0.371083	-0.10618	-0.122204	-0.180375	0.145134	0.285791	-0.608307	-0.0280249	-0.266715	-0.250792	0.102911	0.102911	-0.00816401	-0.256818	0.506631	0.477424	-0.0922298	-0.00992761	-0.0714336	-0.437305		-0.0594378	0.274785	0.0599631
41.6956	-0.371721	-0.103012	-0.117652	-0.184844	0.161032	0.287349	-0.593522	-0.0274035	-0.262739	-0.252496	0.106389	0.106389	-0.010627	-0.258127	0.501655	0.491325	-0.104887	-0.0144662	-0.0760314	-0.430637		-0.0577012	0.274717	0.0599482
41.7939	-0.373146	-0.0951485	-0.117331	-0.187378	0.174607	0.292686	-0.578082	-0.0274687	-0.254691	-0.253689	0.10678	0.10678	-0.0122301	-0.262645	0.493494	0.508425	-0.114619	-0.0189057	-0.0802318	-0.425655		-0.0559224	0.274774	0.0599606
41.8922	-0.373709	-0.0846357	-0.120975	-0.189218	0.190166	0.296897	-0.566386	-0.0298496	-0.242314	-0.253858	0.112215	0.112215	-0.00956375	-0.269265	0.481243	0.525063	-0.117871	-0.0278222	-0.082827	-0.416669		-0.0533582	0.274743	0.0599539
41.9906	-0.372443	-0.0758288	-0.122005	-0.188264	0.203343	0.30092	-0.559488	-0.032349	-0.230541	-0.255693	0.117472	0.117472	-0.00412896	-0.271769	0.469286	0.537496	-0.120114	-0.0342546	-0.0849983	-0.40263		-0.0504259	0.274225	0.0598407
42.0889	-0.373852	-0.0719547	-0.122981	-0.187772	0.217473	0.300021	-0.556117	-0.0317365	-0.223088	-0.257597	0.121255	0.121255	0.00669058	-0.278784	0.457377	0.544694	-0.125275	-0.0403518	-0.0878064	-0.385276		-0.0486913	0.273691	0.0597243
42.1872	-0.380476	-0.0700688	-0.127284	-0.188219	0.224404	0.300448	-0.551124	-0.0293227	-0.215098	-0.255587	0.128191	0.128191	0.0225727	-0.289008	0.441935	0.54886	-0.122214	-0.0475974	-0.0903376	-0.370797		-0.0471265	0.272947	0.059562
42.2855	-0.388437	-0.0652547	-0.131821	-0.187898	0.228867	0.3008	-0.542726	-0.0297687	-0.208006	-0.25093	0.135987	0.135987	0.0415723	-0.298663	0.426941	0.548851	-0.114817	-0.0490561	-0.0952212	-0.357605		-0.0450599	0.271635	0.0592756
42.3838	-0.392184	-0.0617394	-0.136849	-0.185677	0.232116	0.299693	-0.533396	-0.0319778	-0.205616	-0.249123	0.138809	0.138809	0.0608899	-0.309424	0.412494	0.547679	-0.10673	-0.0463218	-0.0976583	-0.341856		-0.0434031	0.269698	0.058853
42.4821	-0.393781	-0.058363	-0.139375	-0.185146	0.234673	0.293165	-0.524881	-0.0343572	-0.199609	-0.247182	0.144092	0.144092	0.0773112	-0.312171	0.398671	0.544934	-0.0969518	-0.0459134	-0.0942776	-0.32693		-0.0411001	0.266941	0.0582514
42.5804	-0.396724	-0.0580459	-0.145451	-0.180001	0.238057	0.281542	-0.51708	-0.0376493	-0.194803	-0.242523	0.152741	0.152741	0.0943875	-0.313997	0.386189	0.538311	-0.0923805	-0.044822	-0.0924126	-0.311292		-0.0391606	0.264027	0.0576154
42.6787	-0.398374	-0.059417	-0.150395	-0.170215	0.239776	0.270589	-0.506024	-0.0389627	-0.190039	-0.233653	0.162738	0.162738	0.113598	-0.316862	0.377559	0.527598	-0.0870513	-0.0461322	-0.0898139	-0.296671		-0.0364506	0.260693	0.0568879
42.777	-0.401354	-0.0584173	-0.155166	-0.160879	0.238177	0.25861	-0.493314	-0.0411057	-0.186516	-0.223496	0.172733	0.172733	0.135251	-0.316261	0.367674	0.518038	-0.083615	-0.0424434	-0.0847548	-0.290256		-0.0337181	0.257572	0.0562069
42.8753	-0.401043	-0.0572208	-0.161064	-0.156855	0.238368	0.246166	-0.48422	-0.0430857	-0.184555	-0.213295	0.185972	0.185972	0.160186	-0.314947	0.355873	0.504817	-0.0776821	-0.0378446	-0.0785093	-0.284094		-0.030853	0.25483	0.0556084
42.9736	-0.403135	-0.0550226	-0.163772	-0.158964	0.238819	0.239938	-0.475123	-0.0451509	-0.188505	-0.20688	0.19566	0.19566	0.185956	-0.31617	0.340942	0.486745	-0.070216	-0.0354217	-0.0773851	-0.282831		-0.0297428	0.252695	0.0551427
43.0719	-0.405849	-0.0524004	-0.161967	-0.158837	0.244398	0.233683	-0.470024	-0.0510307	-0.198278	-0.197851	0.204317	0.204317	0.208494	-0.311279	0.327384	0.466096	-0.0588063	-0.032981	-0.0765936	-0.280651		-0.028393	0.250657	0.0546979
43.1702	-0.405832	-0.0495986	-0.157518	-0.158436	0.253379	0.22621	-0.468232	-0.0555791	-0.208372	-0.186057	0.21866	0.21866	0.233424	-0.303171	0.312018	0.444929	-0.0460584	-0.03009	-0.078152	-0.274669		-0.0257242	0.249148	0.0543686
43.2685	-0.407387	-0.0454453	-0.158376	-0.160478	0.261044	0.220088	-0.465914	-0.0593683	-0.218745	-0.179651	0.230454	0.230454	0.257923	-0.295504	0.300011	0.4218	-0.0309017	-0.0278435	-0.0785279	-0.269696		-0.0238032	0.248341	0.0541923
43.3668	-0.405437	-0.0421599	-0.158137	-0.15991	0.269457	0.217555	-0.468498	-0.0594541	-0.230414	-0.171516	0.242697	0.242697	0.27809	-0.288685	0.29411	0.391614	-0.013287	-0.0235385	-0.0799509	-0.268216		-0.0216491	0.248016	0.0541214
43.4651	-0.403621	-0.0399306	-0.154919	-0.155444	0.278833	0.20932	-0.468692	-0.0630017	-0.240178	-0.158542	0.258932	0.258932	0.304883	-0.276325	0.290921	0.358871	0.00373703	-0.0217722	-0.0780925	-0.26925		-0.0182669	0.247984	0.0541146
43.5634	-0.401592	-0.0382556	-0.154477	-0.153128	0.28834	0.196722	-0.462977	-0.0670152	-0.248421	-0.149382	0.278763	0.278763	0.329267	-0.26526	0.289596	0.326648	0.0194785	-0.0146714	-0.0754968	-0.274269		-0.0148684	0.248658	0.0542616
43.6617	-0.400956	-0.0379747	-0.152971	-0.153229	0.293694	0.184831	-0.461055	-0.0780247	-0.253858	-0.146189	0.295092	0.295092	0.351437	-0.256314	0.28753	0.297688	0.0390245	-0.00508141	-0.0688276	-0.277232		-0.012366	0.249872	0.0545265
43.76	-0.39951	-0.0364602	-0.148043	-0.159295	0.29872	0.172296	-0.462574	-0.0874363	-0.260097	-0.14314	0.305785	0.305785	0.373268	-0.244725	0.28368	0.269813	0.0579506	0.00164015	-0.0585877	-0.279218		-0.0105075	0.250894	0.0547496
43.8583	-0.399653	-0.0357693	-0.140495	-0.166044	0.304304	0.153513	-0.462405	-0.0893444	-0.271109	-0.139952	0.319475	0.319475	0.392169	-0.22887	0.282266	0.242099	0.0754395	0.00720532	-0.0498081	-0.278123		-0.00828136	0.252207	0.055036
43.9566	-0.403061	-0.0379751	-0.127649	-0.172299	0.307679	0.135516	-0.458526	-0.0902238	-0.284791	-0.142255	0.330676	0.330676	0.412338	-0.212229	0.282912	0.214962	0.0876608	0.0153136	-0.0423898	-0.2784		-0.00660321	0.25387	0.0553989
44.0549	-0.407785	-0.0394354	-0.120492	-0.182147	0.312108	0.118486	-0.453386	-0.0932852	-0.299855	-0.145315	0.342479	0.342479	0.430604	-0.197708	0.285418	0.191076	0.100338	0.0216477	-0.0335043	-0.283433		-0.00558562	0.256974	0.0560764
44.1532	-0.409297	-0.0361439	-0.114961	-0.188783	0.313936	0.104961	-0.446463	-0.0976945	-0.309951	-0.148968	0.353774	0.353774	0.443027	-0.179046	0.290672	0.166369	0.113139	0.0288447	-0.0266129	-0.291211		-0.0040317	0.259232	0.0565691
44.2515	-0.410244	-0.0323014	-0.10762	-0.198077	0.315371	0.0921203	-0.441356	-0.10051	-0.316484	-0.155716	0.362437	0.362437	0.453217	-0.160184	0.293941	0.14112	0.119228	0.0337055	-0.0166661	-0.299409		-0.00324954	0.261015	0.0569582
44.3498	-0.4119	-0.0342254	-0.0959209	-0.209185	0.314824	0.0796923	-0.441039	-0.10301	-0.322468	-0.163607	0.37277	0.37277	0.460364	-0.146352	0.295178	0.115694	0.121313	0.0354285	-0.00462422	-0.312716		-0.00385074	0.263667	0.0575369
44.4482	-0.412821	-0.0317284	-0.0835022	-0.216983	0.314211	0.0709906	-0.438551	-0.108889	-0.324254	-0.169756	0.386679	0.386679	0.463796	-0.135242	0.294672	0.088541	0.123435	0.0373767	0.00552118	-0.327961		-0.0038893	0.26631	0.0581136
44.5465	-0.41487	-0.0263182	-0.0725735	-0.224698	0.312514	0.0672909	-0.439234	-0.114027	-0.325776	-0.181029	0.395997	0.395997	0.465252	-0.129867	0.292012	0.0646791	0.124423	0.0407139	0.00920203	-0.346017		-0.00531635	0.269108	0.0587241
44.6448	-0.416381	-0.0190252	-0.0550081	-0.233809	0.313251	0.0660678	-0.442811	-0.112039	-0.326894	-0.194385	0.397834	0.397834	0.466961	-0.128972	0.286746	0.0420634	0.129777	0.0468275	0.0157139	-0.362979		-0.00646135	0.271351	0.0592135
44.7431	-0.420043	-0.0121869	-0.0394524	-0.242095	0.31667	0.0655624	-0.442117	-0.113698	-0.328896	-0.214813	0.40027	0.40027	0.463428	-0.126688	0.277379	0.0226616	0.134775	0.0513507	0.0208063	-0.374972		-0.00808946	0.273246	0.0596272
44.8414	-0.423245	-0.00475098	-0.0212001	-0.251086	0.32231	0.0672961	-0.44374	-0.116564	-0.333256	-0.237786	0.401733	0.401733	0.454829	-0.125008	0.2736	0.00294141	0.140489	0.0534411	0.0212434	-0.379854		-0.00984374	0.2752	0.0600535
44.9397	-0.424026	-0.00066693	-0.00194055	-0.254009	0.324508	0.0742437	-0.448689	-0.122589	-0.329894	-0.260189	0.402301	0.402301	0.44281	-0.121048	0.272866	-0.0150433	0.143161	0.0570966	0.0163944	-0.387429		-0.0114922	0.276461	0.0603287
45.038	-0.425095	0.00167624	0.0126736	-0.252967	0.327215	0.0781353	-0.456022	-0.130335	-0.320796	-0.279521	0.40509	0.40509	0.432106	-0.113239	0.275281	-0.0286471	0.142974	0.0645683	0.0125932	-0.396158		-0.0122688	0.278124	0.0606916
45.1363	-0.430224	0.00277862	0.0236835	-0.250338	0.325949	0.0874985	-0.459575	-0.132817	-0.311598	-0.299088	0.409762	0.409762	0.417234	-0.111339	0.276201	-0.0407744	0.136409	0.0702084	0.00913703	-0.40917		-0.013815	0.27974	0.0610443
45.2346	-0.437297	0.00425578	0.0328877	-0.242889	0.32016	0.0955865	-0.463641	-0.133593	-0.304892	-0.318179	0.411123	0.411123	0.401864	-0.10937	0.276828	-0.0498043	0.126749	0.0740733	0.00725973	-0.424882		-0.0161318	0.280848	0.061286
45.3329	-0.442131	0.00707553	0.0449208	-0.233826	0.316451	0.100567	-0.470544	-0.12917	-0.301184	-0.332436	0.417797	0.417797	0.384905	-0.102306	0.27521	-0.0563331	0.112804	0.0778016	0.0045879	-0.438974		-0.0173493	0.282305	0.0616039
45.4312	-0.448976	0.0122032	0.056848	-0.22858	0.308855	0.105327	-0.473836	-0.125675	-0.295745	-0.346915	0.420357	0.420357	0.370739	-0.0951197	0.269198	-0.0558651	0.0996231	0.0828915	0.00425966	-0.44882		-0.0184437	0.282733	0.0616974
45.5295	-0.454259	0.019016	0.0641572	-0.225294	0.297231	0.117462	-0.477063	-0.115959	-0.292113	-0.36633	0.416683	0.416683	0.350492	-0.0923637	0.263058	-0.0518283	0.084644	0.0857569	-0.000491128	-0.459011		-0.0209764	0.282065	0.0615517
45.6278	-0.456664	0.0262233	0.0721064	-0.219989	0.282048	0.127921	-0.486352	-0.103638	-0.290265	-0.382094	0.411237	0.411237	0.330476	-0.090917	0.254459	-0.0468012	0.068092	0.0845292	-0.00770652	-0.467446		-0.0241772	0.280854	0.0612873
45.7261	-0.457045	0.0359729	0.0773452	-0.211753	0.268729	0.137446	-0.489442	-0.0859305	-0.289839	-0.391516	0.408554	0.408554	0.315613	-0.0891431	0.244085	-0.0481322	0.0517902	0.0852062	-0.0157211	-0.478166		-0.0261697	0.279711	0.0610379
45.8244	-0.455276	0.0438998	0.0773884	-0.196165	0.253739	0.150903	-0.492032	-0.0701823	-0.288778	-0.40474	0.408929	0.408929	0.303167	-0.0912058	0.234599	-0.0490709	0.0397465	0.0881467	-0.0248452	-0.491753		-0.02773	0.279605	0.0610149
45.9227	-0.450513	0.0503301	0.0762952	-0.179047	0.238702	0.16716	-0.499563	-0.0601697	-0.288283	-0.41949	0.407037	0.407037	0.296947	-0.096789	0.22516	-0.0505682	0.0270557	0.0946419	-0.0326018	-0.505882		-0.0296271	0.280342	0.0611755
46.021	-0.440639	0.0599788	0.0743062	-0.161392	0.222485	0.180776	-0.505743	-0.0478313	-0.286858	-0.429053	0.404611	0.404611	0.285216	-0.0992908	0.216476	-0.0508167	0.0194449	0.0975681	-0.0389952	-0.519923		-0.0307534	0.279896	0.0610784
46.1193	-0.428375	0.0698069	0.0764899	-0.137108	0.207542	0.196867	-0.509412	-0.031166	-0.286064	-0.440066	0.405541	0.405541	0.274689	-0.102887	0.203836	-0.0524728	0.0128762	0.0998641	-0.0456886	-0.530978		-0.0305582	0.279784	0.0610538
46.2176	-0.414661	0.0781225	0.0808587	-0.113106	0.193864	0.212187	-0.513847	-0.016521	-0.284511	-0.456494	0.40839	0.40839	0.267345	-0.109365	0.187731	-0.048534	0.00770452	0.102683	-0.0471114	-0.540468		-0.0298671	0.280652	0.0612433
46.3159	-0.397298	0.0874889	0.0842281	-0.0875968	0.182667	0.22534	-0.520367	-0.00392234	-0.283879	-0.471518	0.411009	0.411009	0.256254	-0.111254	0.172895	-0.0394058	0.00386758	0.109037	-0.0519827	-0.549023		-0.0286225	0.281524	0.0614337
46.4142	-0.377967	0.101733	0.0835219	-0.0636279	0.172583	0.238563	-0.525545	0.00842727	-0.288789	-0.48564	0.409628	0.409628	0.244128	-0.112054	0.161781	-0.0252793	0.00219642	0.117262	-0.0589499	-0.551026		-0.0269714	0.281719	0.0614761
46.5125	-0.360886	0.116557	0.0840777	-0.0449533	0.159849	0.249835	-0.530501	0.0220799	-0.297733	-0.498818	0.404937	0.404937	0.235782	-0.112859	0.153298	-0.0093855	0.00223696	0.123423	-0.0638197	-0.550673		-0.0256308	0.281917	0.0615194
46.6108	-0.341225	0.129029	0.0820969	-0.0248858	0.146436	0.25991	-0.530136	0.0355013	-0.309162	-0.505358	0.404641	0.404641	0.229469	-0.112144	0.147672	0.00129453	0.00181178	0.127134	-0.06665	-0.546103		-0.0233014	0.281531	0.0614352
46.7091	-0.318745	0.141962	0.0740012	-0.00635936	0.129694	0.270323	-0.526256	0.0421542	-0.319962	-0.511744	0.412888	0.412888	0.223634	-0.10742	0.148712	0.0126162	-0.00167754	0.126176	-0.0717985	-0.542885		-0.02059	0.282156	0.0615716
46.8074	-0.29133	0.154293	0.0660961	0.00795081	0.111845	0.276125	-0.528987	0.0501413	-0.330137	-0.515935	0.420255	0.420255	0.222614	-0.102356	0.153487	0.0228164	-0.0038897	0.130397	-0.0732844	-0.54312		-0.0176382	0.283538	0.061873
46.9058	-0.262543	0.164184	0.0556606	0.0238674	0.0929941	0.282698	-0.530061	0.0601503	-0.335586	-0.513526	0.429185	0.429185	0.22272	-0.0981843	0.155539	0.0338206	-0.00554253	0.136806	-0.0683211	-0.543479		-0.0135216	0.284353	0.062051
47.0041	-0.236974	0.177704	0.0429582	0.0374831	0.0751401	0.286974	-0.523431	0.0707257	-0.348882	-0.512683	0.437413	0.437413	0.225372	-0.0984909	0.156619	0.0436786	-0.0041035	0.14357	-0.057346	-0.541712		-0.00942853	0.285282	0.0622536
47.1024	-0.207039	0.193608	0.0315053	0.0491168	0.0600096	0.290219	-0.515396	0.0833722	-0.36735	-0.510739	0.447338	0.447338	0.226878	-0.103014	0.157089	0.0514749	-0.00218391	0.149126	-0.0466105	-0.532362		-0.00488095	0.28609	0.0624299
47.2007	-0.174134	0.210748	0.0197401	0.058343	0.0504352	0.290516	-0.506135	0.0936223	-0.381695	-0.509582	0.454583	0.454583	0.23678	-0.10365	0.157249	0.0582463	0.00572017	0.156285	-0.0357573	-0.51592		0.000998965	0.285997	0.0624097
47.299	-0.143274	0.225055	0.00970539	0.0640806	0.0409534	0.291881	-0.492219	0.101318	-0.389062	-0.50957	0.464263	0.464263	0.245563	-0.109239	0.159507	0.0641823	0.0117132	0.161742	-0.027352	-0.498781		0.00673642	0.285799	0.0623665
47.3973	-0.113075	0.234634	0.00214439	0.071656	0.0284032	0.296949	-0.47986	0.1031	-0.393934	-0.509938	0.47097	0.47097	0.255478	-0.120386	0.16463	0.0674771	0.0156385	0.17115	-0.0167909	-0.480405		0.0119404	0.285559	0.0623141
47.4956	-0.0814628	0.241261	-0.00849544	0.0806451	0.0192097	0.299184	-0.471677	0.103853	-0.396923	-0.5104	0.48234	0.48234	0.265537	-0.132079	0.174042	0.0677038	0.0198099	0.178543	-0.00890967	-0.463846		0.0170338	0.28657	0.0625348
47.5939	-0.0528769	0.243368	-0.0187565	0.0873732	0.0123517	0.298623	-0.46919	0.0988192	-0.397684	-0.507222	0.498117	0.498117	0.277392	-0.140141	0.181765	0.0670552	0.0236251	0.188464	-0.00116348	-0.446631		0.0220702	0.288171	0.062884
47.6922	-0.0293225	0.242823	-0.029857	0.0908946	0.00616854	0.303336	-0.463089	0.0918389	-0.393235	-0.503361	0.51327	0.51327	0.289806	-0.146467	0.193996	0.0650726	0.0256776	0.200263	0.00766636	-0.426025		0.0276363	0.289238	0.0631168
47.7905	-0.00835208	0.239462	-0.0355723	0.0899593	-0.00214742	0.311732	-0.457534	0.0846016	-0.389677	-0.501203	0.522283	0.522283	0.29522	-0.150239	0.210994	0.0683551	0.025754	0.206922	0.0186196	-0.405532		0.0322964	0.28943	0.0631588
47.8888	0.00915901	0.234939	-0.0371412	0.083056	-0.00649195	0.315783	-0.451759	0.0806667	-0.388534	-0.49253	0.530808	0.530808	0.297675	-0.152754	0.228947	0.0710199	0.0209657	0.213301	0.0295097	-0.381038		0.0368195	0.288553	0.0629675
47.9871	0.0246063	0.231093	-0.0374165	0.0724246	-0.0111646	0.318438	-0.441084	0.077053	-0.383245	-0.48314	0.540269	0.540269	0.298106	-0.155189	0.24445	0.0729765	0.0167306	0.21591	0.0425182	-0.35466		0.0414473	0.286786	0.0625817
48.0854	0.0332558	0.224753	-0.0396689	0.0601983	-0.0122794	0.324372	-0.433299	0.0707722	-0.376202	-0.474139	0.549875	0.549875	0.303273	-0.160334	0.259951	0.0727399	0.0103806	0.219636	0.0520892	-0.332565		0.0451342	0.286135	0.0624398
48.1837	0.0417933	0.215485	-0.0460947	0.0433458	-0.015967	0.326788	-0.431021	0.0609949	-0.365963	-0.46255	0.554327	0.554327	0.308979	-0.165031	0.276981	0.0714413	0.00213036	0.221971	0.0625675	-0.313583		0.047046	0.284864	0.0621624
48.282	0.0452108	0.206648	-0.0546457	0.0252673	-0.0172657	0.327959	-0.424811	0.0533466	-0.359157	-0.44309	0.558005	0.558005	0.310323	-0.16825	0.296669	0.0660541	-0.00797474	0.222136	0.0717909	-0.294646		0.0485787	0.282733	0.0616975
48.3803	0.043834	0.197969	-0.0624486	0.00879222	-0.0190054	0.329964	-0.413427	0.0472423	-0.353313	-0.423336	0.560715	0.560715	0.316268	-0.177301	0.317151	0.0571681	-0.0173249	0.218054	0.0815359	-0.274608		0.0499322	0.280685	0.0612505
48.4786	0.0406525	0.186701	-0.0691237	-0.00153296	-0.0197385	0.332973	-0.399299	0.0431896	-0.341912	-0.4034	0.566474	0.566474	0.327734	-0.180717	0.336141	0.0476001	-0.0300952	0.210241	0.0935411	-0.255012		0.0525446	0.278772	0.0608329
48.5769	0.0349922	0.170085	-0.0763697	-0.0105848	-0.0196834	0.335151	-0.386393	0.0434993	-0.331251	-0.3796	0.576305	0.576305	0.33871	-0.182702	0.351071	0.0372549	-0.0455777	0.204414	0.101667	-0.23681		0.0550242	0.277538	0.0605638
48.6752	0.0218898	0.154817	-0.0830133	-0.0201647	-0.0226851	0.33428	-0.379406	0.0447928	-0.319801	-0.356385	0.585331	0.585331	0.349919	-0.18523	0.365443	0.0322862	-0.058584	0.199928	0.113187	-0.218964		0.0571485	0.277006	0.0604478
48.7735	0.00509132	0.138338	-0.0876271	-0.0302943	-0.0268815	0.334252	-0.369644	0.0456516	-0.30987	-0.333251	0.590695	0.590695	0.357011	-0.189062	0.373046	0.0267005	-0.0681871	0.194779	0.128812	-0.198857		0.0585698	0.275412	0.0600999
48.8718	-0.0183538	0.122827	-0.0933762	-0.0376108	-0.0317741	0.341876	-0.356416	0.0478436	-0.30106	-0.306384	0.597555	0.597555	0.359747	-0.193821	0.37925	0.0219307	-0.0778971	0.184301	0.139542	-0.179524		0.0598106	0.274126	0.0598193
48.9701	-0.0449144	0.109369	-0.0983208	-0.045757	-0.0357935	0.346155	-0.346882	0.0464951	-0.294768	-0.283817	0.605932	0.605932	0.363332	-0.195508	0.385351	0.0156594	-0.0882031	0.175545	0.145899	-0.164483		0.0600612	0.274303	0.0598578
49.0684	-0.0744537	0.0946105	-0.10217	-0.0554156	-0.0389964	0.346052	-0.340731	0.0449448	-0.284925	-0.260076	0.6126	0.6126	0.366149	-0.194459	0.3914	0.0106825	-0.10287	0.163008	0.14836	-0.148267		0.0594021	0.274093	0.059812
49.1667	-0.108592	0.0798017	-0.109366	-0.0626721	-0.0437758	0.34873	-0.334664	0.0428973	-0.271666	-0.238867	0.616973	0.616973	0.366097	-0.190387	0.397416	0.00619456	-0.113909	0.147244	0.153644	-0.139778		0.0581147	0.274052	0.0598031
49.265	-0.145081	0.064814	-0.118812	-0.0674061	-0.0529951	0.346827	-0.330048	0.0399381	-0.26117	-0.214397	0.621175	0.621175	0.361146	-0.184915	0.405772	0.00323999	-0.126902	0.131341	0.159757	-0.137423		0.0558018	0.274608	0.0599244
49.3634	-0.180017	0.0495897	-0.128941	-0.0728521	-0.0602781	0.345408	-0.327359	0.0375821	-0.258904	-0.1883	0.62116	0.62116	0.358639	-0.17513	0.414593	0.000458705	-0.133862	0.119956	0.169364	-0.132885		0.0539691	0.275142	0.0600408
49.4617	-0.215309	0.0387489	-0.140055	-0.0797246	-0.0653699	0.338187	-0.320575	0.0384846	-0.254859	-0.163081	0.621954	0.621954	0.356351	-0.161796	0.422419	-0.00117597	-0.134051	0.102849	0.175647	-0.130203		0.0525197	0.275201	0.0600539
49.56	-0.254154	0.0283892	-0.15041	-0.0831799	-0.0735778	0.33319	-0.308615	0.0400656	-0.253631	-0.137739	0.621204	0.621204	0.350767	-0.148311	0.429054	-0.00150385	-0.138411	0.0881726	0.181582	-0.127049		0.0508523	0.275387	0.0600944
49.6583	-0.295156	0.0221505	-0.160072	-0.0812857	-0.0827284	0.327657	-0.293277	0.0485978	-0.255649	-0.113451	0.616862	0.616862	0.347616	-0.137033	0.437124	-0.000326136	-0.142225	0.0751337	0.191013	-0.121714		0.050005	0.275639	0.0601493
49.7566	-0.334662	0.0183065	-0.1699	-0.0795137	-0.0883194	0.317955	-0.279929	0.061801	-0.261816	-0.0939841	0.61297	0.61297	0.348578	-0.127706	0.439724	-0.000340967	-0.141918	0.05898	0.201592	-0.118835		0.0487977	0.276529	0.0603437
49.8549	-0.370745	0.0141711	-0.18357	-0.0756781	-0.0942159	0.306015	-0.271806	0.0741034	-0.266954	-0.0757674	0.613965	0.613965	0.352565	-0.120906	0.439181	-0.00238342	-0.142298	0.0468634	0.205088	-0.114679		0.0473458	0.278793	0.0608376
49.9532	-0.40305	0.014151	-0.198812	-0.0693318	-0.101437	0.293977	-0.263374	0.0842344	-0.271116	-0.0617464	0.613911	0.613911	0.354468	-0.114376	0.437873	-0.00166537	-0.136863	0.0310817	0.206145	-0.112838		0.0457571	0.280603	0.0612326
50.0515	-0.43276	0.0147668	-0.213556	-0.0588375	-0.104299	0.283191	-0.25708	0.0957296	-0.277016	-0.0463704	0.616643	0.616643	0.353996	-0.10467	0.437577	-0.0022104	-0.130104	0.017067	0.201894	-0.11622		0.0447192	0.282977	0.0617506
50.1498	-0.455009	0.0174743	-0.228011	-0.0476038	-0.109911	0.270685	-0.251834	0.108891	-0.285205	-0.0304544	0.616929	0.616929	0.349405	-0.0938039	0.435398	-0.00201589	-0.126826	0.0018299	0.199409	-0.115398		0.0435438	0.284376	0.062056
50.2481	-0.478814	0.0244983	-0.237767	-0.0370471	-0.112506	0.25933	-0.240671	0.118383	-0.294523	-0.0147136	0.620311	0.620311	0.34379	-0.0821807	0.432656	0.00116814	-0.125707	-0.00993071	0.193817	-0.109842		0.0435281	0.286	0.0624103
50.3464	-0.496688	0.0285279	-0.241416	-0.0255563	-0.117152	0.250532	-0.234316	0.125711	-0.299967	-0.00332353	0.62313	0.62313	0.345628	-0.070359	0.427913	0.00683703	-0.12491	-0.0199571	0.182302	-0.106626		0.0436721	0.287249	0.0626829
50.4447	-0.511161	0.0302914	-0.243419	-0.0133693	-0.12468	0.241026	-0.234586	0.132622	-0.306193	0.00752967	0.630738	0.630738	0.34384	-0.0552736	0.419385	0.0116254	-0.123396	-0.0272871	0.173204	-0.103539		0.0439048	0.289206	0.06311
50.543	-0.521228	0.0349857	-0.245942	-0.00948393	-0.130988	0.228176	-0.237747	0.136382	-0.313034	0.0176134	0.639202	0.639202	0.33678	-0.0464866	0.410491	0.0122793	-0.120232	-0.030677	0.163371	-0.102991		0.0429836	0.290969	0.0634947
50.6413	-0.525069	0.0424351	-0.247969	-0.00525574	-0.133313	0.214839	-0.244051	0.133912	-0.317294	0.0241905	0.64586	0.64586	0.32977	-0.038035	0.404748	0.0158949	-0.118699	-0.0372157	0.156038	-0.102077		0.0422285	0.29196	0.0637109
50.7396	-0.522661	0.0495032	-0.247894	-0.000565701	-0.129408	0.203959	-0.247469	0.12981	-0.318194	0.0312607	0.650806	0.650806	0.322484	-0.0295575	0.397266	0.0188733	-0.120682	-0.0438903	0.144146	-0.103592		0.0417501	0.291464	0.0636026
50.8379	-0.515371	0.0542368	-0.246668	0.0016126	-0.119835	0.191339	-0.254343	0.127086	-0.317411	0.0384706	0.653562	0.653562	0.319746	-0.0241348	0.393717	0.0205839	-0.126739	-0.04622	0.126922	-0.107977		0.0411069	0.29053	0.0633988
50.9362	-0.503014	0.0573289	-0.24375	0.000757666	-0.110514	0.173805	-0.263395	0.120637	-0.315378	0.0431113	0.65512	0.65512	0.317759	-0.0206851	0.392648	0.0224325	-0.135212	-0.0444905	0.113001	-0.110863		0.040221	0.289033	0.0630722
51.0345	-0.490134	0.0606212	-0.23909	0.00156788	-0.103485	0.154931	-0.265619	0.115402	-0.312586	0.0495308	0.65328	0.65328	0.314468	-0.0183565	0.390982	0.0258802	-0.144455	-0.0480538	0.0988739	-0.111828		0.0392605	0.286423	0.0625026
51.1328	-0.47207	0.0645044	-0.230597	0.00381253	-0.0949174	0.139854	-0.26974	0.110823	-0.315158	0.0561593	0.655482	0.655482	0.30845	-0.0178279	0.387233	0.0295503	-0.150813	-0.0501718	0.0860825	-0.11571		0.0390214	0.284384	0.0620578
51.2311	-0.453633	0.0694582	-0.217409	0.00408173	-0.0826602	0.119476	-0.273613	0.105045	-0.319114	0.0617567	0.656831	0.656831	0.305642	-0.0215907	0.383106	0.032405	-0.157207	-0.0465713	0.0718634	-0.114927		0.0389886	0.281954	0.0615273
51.3294	-0.433707	0.0740043	-0.202051	-0.00183555	-0.0671364	0.102508	-0.277558	0.101966	-0.320378	0.0656463	0.661204	0.661204	0.303031	-0.0279401	0.377223	0.032211	-0.164383	-0.042658	0.0554759	-0.112053		0.0392388	0.279983	0.0610974
51.4277	-0.414737	0.0810774	-0.188825	-0.004699	-0.0554046	0.0833348	-0.283322	0.100882	-0.319178	0.0683884	0.670089	0.670089	0.296294	-0.0334112	0.365839	0.030605	-0.171488	-0.0434642	0.0363478	-0.110088		0.0389165	0.279055	0.0608949
51.526	-0.396316	0.0854814	-0.179275	-0.007877	-0.0447503	0.0683562	-0.291276	0.0971893	-0.320654	0.0688456	0.678934	0.678934	0.287746	-0.0430158	0.354204	0.0306044	-0.182006	-0.0419177	0.0179684	-0.108579		0.0376298	0.278991	0.0608808
51.6243	-0.374178	0.0908728	-0.167829	-0.0156918	-0.0346352	0.0546857	-0.301676	0.0937439	-0.319909	0.0691686	0.686312	0.686312	0.282734	-0.0543625	0.340409	0.0303106	-0.187552	-0.0419756	-0.00209557	-0.107966		0.0363339	0.278543	0.0607831
51.7226	-0.34688	0.0955506	-0.153533	-0.0248872	-0.0224497	0.0466151	-0.31225	0.0843442	-0.316301	0.0693604	0.694983	0.694983	0.27337	-0.068464	0.324226	0.0272205	-0.19144	-0.0445365	-0.0242021	-0.111962		0.0346874	0.277918	0.0606467
51.821	-0.316824	0.0985852	-0.135925	-0.0353096	-0.0091642	0.040912	-0.323666	0.0672618	-0.312712	0.0726745	0.70398	0.70398	0.259531	-0.0809657	0.312738	0.0251408	-0.195094	-0.0432471	-0.047231	-0.117036		0.0333815	0.277582	0.0605733
51.9193	-0.289487	0.102406	-0.119571	-0.0472423	0.00354925	0.0354801	-0.33095	0.0497792	-0.309329	0.0787228	0.712729	0.712729	0.243721	-0.0932064	0.301658	0.0248415	-0.198091	-0.0456567	-0.0635543	-0.121562		0.0323483	0.277566	0.0605699
52.0176	-0.265583	0.103726	-0.104936	-0.0597857	0.0163775	0.0337002	-0.338395	0.0337144	-0.303498	0.085551	0.719882	0.719882	0.227432	-0.104047	0.289453	0.0211608	-0.202181	-0.0450982	-0.0747886	-0.125192		0.0313687	0.277498	0.060555
52.1159	-0.244157	0.101869	-0.090821	-0.0745868	0.0249489	0.030572	-0.347317	0.0153591	-0.296819	0.0926393	0.722447	0.722447	0.212227	-0.120932	0.280893	0.020123	-0.209368	-0.0423252	-0.0830392	-0.125285		0.0294437	0.277184	0.0604865
52.2142	-0.229376	0.09749	-0.0728987	-0.0916134	0.0356776	0.0284025	-0.357023	-0.00371093	-0.290318	0.0975897	0.728995	0.728995	0.198874	-0.139676	0.273203	0.0206892	-0.209322	-0.0348256	-0.0900507	-0.124723		0.0283189	0.278284	0.0607266
52.3125	-0.216713	0.0933028	-0.0573326	-0.107425	0.0441963	0.0268903	-0.365054	-0.0135035	-0.285856	0.103491	0.734184	0.734184	0.185869	-0.161288	0.266435	0.0209094	-0.205383	-0.0278226	-0.0963705	-0.130886		0.0270914	0.279623	0.0610187
52.4108	-0.206996	0.0916826	-0.0502633	-0.125471	0.0528271	0.0232185	-0.370931	-0.019676	-0.28628	0.109096	0.741068	0.741068	0.169946	-0.181452	0.261591	0.0191232	-0.199479	-0.019434	-0.0947186	-0.132395		0.0261262	0.281662	0.0614637
52.5091	-0.197378	0.0888764	-0.0450318	-0.143195	0.0659814	0.0183142	-0.372834	-0.0236214	-0.283255	0.113568	0.740766	0.740766	0.157141	-0.203584	0.262293	0.0194716	-0.192192	-0.0103672	-0.0964789	-0.133238		0.0253002	0.282034	0.0615448
52.6074	-0.194909	0.0790816	-0.0398511	-0.153333	0.074114	0.0158627	-0.374367	-0.0248952	-0.280209	0.117291	0.736122	0.736122	0.147745	-0.221479	0.26284	0.0240188	-0.18164	-0.00323571	-0.103143	-0.134466		0.0240833	0.281296	0.0613838
52.7057	-0.198234	0.0692762	-0.0365454	-0.161891	0.0769837	0.0146582	-0.37059	-0.0242869	-0.277549	0.118341	0.730586	0.730586	0.136396	-0.240021	0.261774	0.0266123	-0.167123	0.00871654	-0.109473	-0.133172		0.0227523	0.279918	0.0610831
52.804	-0.20271	0.0569498	-0.0354714	-0.172629	0.0789979	0.012302	-0.365498	-0.0230831	-0.278659	0.116578	0.727312	0.727312	0.12395	-0.256966	0.262708	0.0285978	-0.150188	0.0220931	-0.115095	-0.131109		0.0212695	0.279354	0.0609601
52.9023	-0.213451	0.0467611	-0.0346046	-0.177105	0.0763337	0.0137531	-0.359678	-0.0212863	-0.278817	0.116538	0.726285	0.726285	0.110486	-0.269101	0.262305	0.0334296	-0.131472	0.0313389	-0.116752	-0.128763		0.0206243	0.279013	0.0608856
53.0006	-0.225898	0.0385425	-0.0304252	-0.179574	0.0771354	0.0164789	-0.351624	-0.0160506	-0.277095	0.115662	0.721424	0.721424	0.0976608	-0.280411	0.256139	0.0393192	-0.109228	0.0389657	-0.118521	-0.128788		0.0202568	0.277315	0.060515
[truncated: 75 more rows]

## Sheet: Laser in terminal_CCK-Cre
time	0719_1 side_0029_4	0722_1 side_12	0722_1 side_17	0812_4	0812_5	0812_6	0813_1 side_3	0813_1 side_1	0815_1 side_5649_1	0815_1 side_1020_3	0815_2 side_5835_2	0815_2 side_1128_5	0902_2 side_2	0902_2 side_5	0903_1 side_6	0903_1 side_3		N=8,n=16	sd	se
[truncated: 869 more rows]

[truncated: 1 more sheets: Laser in terminal_CCK-KO]
