# Supplementary material for: Cholecystokinin modulates age-dependent thalamocortical neuroplasticity
Source: eLife journal article supplement (doi:10.7554/elife.101513), 2024-10-14
Supplement: data1 [file Figure 2I.xlsx]

## Sheet: shRNA-scramble
Time	M0415_1 side_155005_7	M0415_1 side_171401_9	M0417_2 side_202614_8	M0417_2 side_195250_7	M0418_2 side_200932_4	M0419_1 side_153039_4	M0419_1 side_165608_3	M0419_2 side_182812_9	M0419_2 side_185908_5	M0419_2 side_185908_16	M0419_2 side_185908_18	M0420_1 side_4	M0420_1 side_11	M0420_2 side_5	M0420_2 side_9	M0420_2 side_10	M0421_1 side_163438_13	M0421_1 side_183830_7	1220-1 side-134256_9	1220-1 side-153406_5	1219-1 side_162904_4		N=11,n=21	sd	se
-24.9545	0.23785	-0.184844	0.0127037	0.204511	0.292481	-0.0301457	0.315167	-0.0966467	0.163756	0.0889595	-0.279162	0.362428	-0.035156	0.195328	0.118949	-0.101929	0.142597	-0.246662	-0.149835	0.10994	0.295333		0.0674106	0.188136	0.0410547
-24.8562	0.246446	-0.168333	-0.00291529	0.208277	0.318592	-0.0168347	0.276925	-0.110097	0.155979	0.0743949	-0.26864	0.363318	-0.0148906	0.192922	0.136433	-0.11352	0.145212	-0.274287	-0.145263	0.11148	0.295737		0.0671875	0.188798	0.0411991
-24.7579	0.258726	-0.150358	-0.0176288	0.208219	0.345592	-0.00096876	0.24229	-0.120664	0.150181	0.0549844	-0.259898	0.360292	0.00414522	0.186563	0.155392	-0.124867	0.147026	-0.303983	-0.139518	0.108951	0.293961		0.0665922	0.190495	0.0415694
-24.6596	0.265172	-0.133192	-0.0355369	0.206562	0.375591	0.0157437	0.218656	-0.134525	0.14631	0.0403167	-0.253662	0.356038	0.021706	0.180118	0.176227	-0.1311	0.140343	-0.337518	-0.134559	0.109235	0.291483		0.0658766	0.1942	0.042378
-24.5613	0.269351	-0.115263	-0.0501949	0.203532	0.405281	0.0357661	0.202688	-0.150888	0.136078	0.0262173	-0.246773	0.352121	0.0401204	0.175556	0.199975	-0.129252	0.129554	-0.366861	-0.128903	0.112171	0.288705		0.0661419	0.198137	0.0432371
-24.4629	0.276932	-0.0989509	-0.0634306	0.199508	0.43489	0.0538072	0.195478	-0.161285	0.126366	0.00894331	-0.236413	0.344983	0.0577375	0.171063	0.227049	-0.130831	0.116894	-0.397052	-0.123442	0.117035	0.282045		0.0667299	0.202962	0.0442899
-24.3646	0.275668	-0.0854281	-0.0755542	0.198161	0.466327	0.0726551	0.191517	-0.177085	0.114538	-0.002226	-0.227866	0.340307	0.0732822	0.161421	0.251349	-0.12991	0.104926	-0.427985	-0.117407	0.119871	0.273097		0.0666504	0.208739	0.0455505
-24.2663	0.266223	-0.074206	-0.0915824	0.190723	0.497669	0.0899664	0.189106	-0.184607	0.0977694	-0.0108639	-0.222588	0.331348	0.0880722	0.151529	0.273498	-0.125797	0.0926807	-0.462586	-0.10802	0.122354	0.260932		0.0653153	0.214345	0.046774
-24.168	0.255734	-0.0621048	-0.105763	0.176717	0.524354	0.103901	0.187039	-0.190362	0.0776254	-0.0192636	-0.21937	0.321907	0.100919	0.141671	0.288325	-0.125378	0.0755846	-0.489664	-0.0985569	0.120377	0.248583		0.0624892	0.218802	0.0477466
-24.0697	0.246281	-0.0532218	-0.123533	0.158054	0.544782	0.116951	0.188917	-0.196305	0.0560468	-0.0211939	-0.218959	0.316736	0.11854	0.137212	0.295474	-0.127054	0.0558852	-0.51917	-0.0868891	0.119132	0.236925		0.0592671	0.223966	0.0488733
-23.9714	0.241837	-0.0441361	-0.14017	0.135775	0.564932	0.133522	0.18913	-0.196559	0.0350893	-0.0226653	-0.225802	0.308736	0.135683	0.13713	0.297587	-0.123068	0.0389617	-0.544689	-0.078972	0.117416	0.226193		0.0564729	0.229002	0.0499724
-23.8731	0.239418	-0.0355433	-0.158547	0.115666	0.580859	0.153852	0.190043	-0.197911	0.0116335	-0.021078	-0.234934	0.300995	0.152041	0.138315	0.295904	-0.122115	0.0178963	-0.56783	-0.0692209	0.112948	0.21728		0.0533178	0.234252	0.051118
-23.7748	0.237015	-0.026167	-0.176272	0.0920346	0.597788	0.169809	0.199856	-0.198621	-0.00637872	-0.0193199	-0.242203	0.29489	0.163847	0.130757	0.289481	-0.123757	0.00139247	-0.589549	-0.060354	0.107264	0.206096		0.0498861	0.239445	0.0522511
-23.6765	0.231771	-0.0170889	-0.19048	0.0696446	0.613234	0.182341	0.214199	-0.202379	-0.0210998	-0.0152131	-0.251738	0.288976	0.174121	0.122512	0.279764	-0.119479	-0.0112316	-0.603568	-0.052687	0.102075	0.193301		0.0469988	0.243516	0.0531397
-23.5782	0.231881	-0.00809644	-0.19656	0.0527807	0.617104	0.192499	0.232625	-0.202063	-0.0356301	-0.0148831	-0.26015	0.278957	0.188183	0.112726	0.271993	-0.113003	-0.0192889	-0.60514	-0.047307	0.0961424	0.182565		0.0454922	0.24474	0.0534066
-23.4799	0.240768	0.000392693	-0.19622	0.0333698	0.615829	0.196977	0.245671	-0.198248	-0.0504974	-0.0148446	-0.26538	0.266595	0.200426	0.101692	0.266318	-0.106071	-0.0379175	-0.59822	-0.0434208	0.0930137	0.172883		0.0439579	0.244111	0.0532695
-23.3816	0.245525	-0.00210233	-0.19382	0.0126428	0.613096	0.196961	0.255496	-0.192235	-0.071876	-0.0140673	-0.271959	0.255131	0.2131	0.0894269	0.255942	-0.0925336	-0.0595029	-0.582132	-0.0398714	0.0951017	0.162786		0.0416719	0.242006	0.05281
-23.2833	0.249108	-0.00743298	-0.183453	-0.00697307	0.604779	0.193557	0.267015	-0.185311	-0.0967653	-0.00906973	-0.278291	0.247566	0.221145	0.076152	0.234961	-0.0813302	-0.0819882	-0.565149	-0.0360916	0.0989288	0.155829		0.0389136	0.238953	0.0521438
-23.185	0.252946	-0.018672	-0.174715	-0.0275082	0.599782	0.192094	0.278691	-0.181052	-0.120763	-0.000456375	-0.287244	0.242794	0.22635	0.0645724	0.218903	-0.0716242	-0.108024	-0.544149	-0.0287474	0.105565	0.148566		0.0365384	0.237143	0.0517487
-23.0867	0.256808	-0.0294281	-0.164931	-0.047959	0.593848	0.190537	0.288515	-0.180184	-0.14355	0.00992998	-0.300868	0.240446	0.231271	0.0533057	0.204249	-0.0599825	-0.130918	-0.523015	-0.0200759	0.112383	0.141667		0.0343833	0.236102	0.0515218
-22.9884	0.257461	-0.0403297	-0.155385	-0.0670006	0.588756	0.183658	0.296135	-0.175254	-0.160982	0.0188594	-0.313583	0.234281	0.233722	0.0452924	0.191792	-0.0483816	-0.15204	-0.502818	-0.0101797	0.11831	0.136383		0.0323189	0.234757	0.0512281
-22.8901	0.256006	-0.0509745	-0.146559	-0.0794277	0.581191	0.176616	0.303822	-0.174128	-0.17459	0.0226896	-0.328614	0.222541	0.235719	0.0343864	0.178765	-0.0362717	-0.169745	-0.479096	0.00256762	0.122207	0.130874		0.0299038	0.232757	0.0507917
-22.7918	0.261732	-0.0621733	-0.144619	-0.0877139	0.571182	0.168873	0.317937	-0.17412	-0.191454	0.0198486	-0.340395	0.211352	0.235907	0.0248313	0.163544	-0.0225837	-0.1883	-0.455086	0.0150892	0.124	0.127755		0.0274099	0.231657	0.0505517
-22.6935	0.262771	-0.0741485	-0.136989	-0.0955201	0.557827	0.165217	0.326242	-0.17544	-0.21005	0.021781	-0.353735	0.203848	0.236207	0.0164554	0.148639	-0.00881999	-0.207532	-0.42397	0.0286503	0.130129	0.127685		0.0256784	0.229975	0.0501847
-22.5952	0.265768	-0.0847352	-0.123518	-0.105991	0.538352	0.158513	0.331918	-0.175765	-0.228948	0.0140502	-0.35693	0.199516	0.23321	0.00905415	0.130318	0.00301063	-0.219464	-0.390595	0.0421792	0.134072	0.127227		0.0238687	0.22639	0.0494024
-22.4969	0.271031	-0.0934414	-0.109732	-0.119524	0.516699	0.150155	0.337348	-0.174925	-0.244929	0.00390914	-0.354845	0.192782	0.227425	8.52006e-05	0.109166	0.0157544	-0.223674	-0.357557	0.0539376	0.135496	0.128686		0.0220879	0.221991	0.0484423
-22.3986	0.270947	-0.098963	-0.0973396	-0.127787	0.494765	0.13322	0.331394	-0.173157	-0.260585	0.000418598	-0.354908	0.187802	0.223295	-0.00619427	0.087326	0.0335522	-0.228536	-0.320518	0.0662621	0.13733	0.132759		0.0205277	0.216699	0.0472876
-22.3003	0.278804	-0.10403	-0.0842733	-0.130701	0.473018	0.113136	0.31871	-0.162499	-0.276411	-0.00433579	-0.350956	0.183578	0.219143	-0.00818932	0.0699198	0.0512504	-0.231034	-0.285265	0.07662	0.136777	0.137746		0.0200479	0.211123	0.0460708
-22.202	0.294508	-0.105032	-0.0659055	-0.132209	0.455575	0.0955759	0.307264	-0.157993	-0.293522	-0.00863318	-0.342481	0.183692	0.210219	-0.00573002	0.0506009	0.0665821	-0.224553	-0.248509	0.0838594	0.134275	0.148223		0.0212289	0.206314	0.0450215
-22.1037	0.313277	-0.103095	-0.0455055	-0.123582	0.446838	0.0738936	0.299	-0.148528	-0.311783	-0.00875734	-0.332937	0.187398	0.198409	-0.001237	0.0342702	0.0828143	-0.218166	-0.218823	0.091296	0.13379	0.159024		0.0241713	0.203316	0.0443672
-22.0053	0.327388	-0.0936852	-0.0163948	-0.112551	0.439126	0.0499831	0.288633	-0.135926	-0.32987	-0.0134221	-0.314385	0.187601	0.184076	-0.00156737	0.0225687	0.10328	-0.209165	-0.186186	0.0963214	0.135849	0.169145		0.0281343	0.199074	0.0434414
-21.907	0.337026	-0.0873955	0.017176	-0.0978485	0.429199	0.0231931	0.283135	-0.126103	-0.343268	-0.0144305	-0.286337	0.189691	0.167651	-0.00310731	0.0152819	0.119002	-0.200321	-0.156428	0.102839	0.138292	0.178098		0.0326355	0.194457	0.0424341
-21.8087	0.34698	-0.0814195	0.0547076	-0.0860677	0.431425	-0.00372545	0.282734	-0.117343	-0.355496	-0.0102984	-0.257543	0.192424	0.15035	-0.00485705	0.0100637	0.136414	-0.189024	-0.126751	0.105699	0.140187	0.188203		0.0384125	0.192169	0.0419347
-21.7104	0.35521	-0.0739287	0.0947228	-0.0709423	0.434188	-0.0258713	0.277778	-0.109873	-0.368833	-0.0072205	-0.232497	0.190795	0.134276	-0.000765005	0.013199	0.158617	-0.180769	-0.0946886	0.109782	0.14426	0.201183		0.0451726	0.191001	0.0416798
-21.6121	0.362981	-0.069157	0.134837	-0.0550409	0.442647	-0.0484415	0.269584	-0.096855	-0.381319	-0.0018866	-0.205934	0.188838	0.11503	0.00169884	0.0184227	0.17566	-0.174739	-0.0657902	0.114264	0.144525	0.214154		0.0515942	0.190833	0.0416432
-21.5138	0.366442	-0.0668453	0.169419	-0.0377493	0.454464	-0.0719082	0.26288	-0.0879353	-0.396661	0.00503507	-0.180517	0.191255	0.0898738	0.00895271	0.0205197	0.190714	-0.164155	-0.044215	0.118089	0.141123	0.225039		0.0568485	0.192037	0.0419059
-21.4155	0.362841	-0.0705902	0.199266	-0.0148545	0.460192	-0.0922719	0.258	-0.0858071	-0.409343	0.0120087	-0.156596	0.19545	0.0624442	0.0182948	0.0162806	0.206245	-0.142023	-0.0276956	0.122089	0.134586	0.23429		0.061086	0.192568	0.0420218
-21.3172	0.360606	-0.0675788	0.228458	0.0116676	0.460307	-0.109903	0.257537	-0.0857353	-0.416728	0.0184387	-0.133458	0.196203	0.0343588	0.0256269	0.0156714	0.217581	-0.122432	-0.016031	0.126034	0.124365	0.241294		0.0650612	0.192754	0.0420623
-21.2189	0.352497	-0.0609974	0.250457	0.0390706	0.460976	-0.124968	0.261036	-0.0836692	-0.416894	0.02138	-0.114867	0.195869	0.0054835	0.0337792	0.0195082	0.229821	-0.10726	-0.000252031	0.124284	0.109998	0.248615		0.0687556	0.192386	0.0419821
-21.1206	0.341342	-0.0485607	0.268536	0.0725658	0.456415	-0.140081	0.269386	-0.0790464	-0.417038	0.0239075	-0.0911252	0.196354	-0.0228645	0.0410715	0.0174632	0.242626	-0.0947715	0.0111494	0.119432	0.094334	0.254613		0.0721766	0.191912	0.0418787
-21.0223	0.328624	-0.0398632	0.287008	0.113261	0.450937	-0.158411	0.286658	-0.0649484	-0.410857	0.0228804	-0.0635516	0.193886	-0.049345	0.0457852	0.0131134	0.250078	-0.0793505	0.0266607	0.114123	0.083725	0.258995		0.0766385	0.19131	0.0417473
-20.924	0.320759	-0.032349	0.303392	0.151572	0.444308	-0.173953	0.307386	-0.0569098	-0.409604	0.0184475	-0.0370758	0.196871	-0.0726892	0.0464122	0.00742346	0.255217	-0.0654627	0.0469641	0.106648	0.0754506	0.263825		0.080792	0.192887	0.0420914
-20.8257	0.31814	-0.0250305	0.319798	0.185824	0.441028	-0.19031	0.329237	-0.0423095	-0.409599	0.0152688	-0.00745568	0.206034	-0.0925335	0.0488413	0.00481859	0.256548	-0.0504953	0.0597806	0.0964009	0.0643694	0.270351		0.0856527	0.195842	0.0427362
-20.7274	0.306284	-0.0162791	0.335417	0.22123	0.436082	-0.197902	0.345588	-0.0304967	-0.406805	0.020319	0.0189154	0.216427	-0.112236	0.0516706	0.0109089	0.254235	-0.0354333	0.0681436	0.0836266	0.0538765	0.275157		0.0904156	0.197384	0.0430728
-20.6291	0.300851	-0.00729554	0.346647	0.260785	0.434582	-0.208453	0.366467	-0.0231752	-0.40281	0.0273278	0.0489359	0.224284	-0.131226	0.0555991	0.0179496	0.250945	-0.0189767	0.0704586	0.0697853	0.0395997	0.277933		0.0952482	0.200438	0.0437392
-20.5308	0.298575	0.00220636	0.354797	0.306203	0.438013	-0.216675	0.384709	-0.0137662	-0.403436	0.0418299	0.067508	0.229657	-0.144543	0.0605279	0.0275935	0.247196	-0.00532781	0.0730963	0.0561027	0.0252205	0.278999		0.100404	0.204627	0.0446532
-20.4325	0.291759	0.0093839	0.362491	0.35296	0.440394	-0.223373	0.398902	-0.00364923	-0.40189	0.0551971	0.0796642	0.235523	-0.156391	0.0691758	0.039732	0.237698	0.00403047	0.0763296	0.0438671	0.0127551	0.279673		0.104963	0.20847	0.0454919
-20.3342	0.287105	0.015845	0.374106	0.394888	0.443246	-0.222042	0.418797	0.00550843	-0.400109	0.062373	0.0917884	0.240575	-0.170758	0.0756139	0.0526922	0.221297	0.0154528	0.076856	0.0329738	-0.0011724	0.28001		0.109288	0.212859	0.0464496
-20.2359	0.277122	0.021368	0.379752	0.428154	0.441301	-0.218381	0.444721	0.0133279	-0.396415	0.0639712	0.09283	0.240953	-0.185496	0.0788437	0.0568864	0.205777	0.0230112	0.0776056	0.0225665	-0.0113136	0.280922		0.11131	0.216598	0.0472656
-20.1376	0.261025	0.0199924	0.383584	0.459105	0.433517	-0.219845	0.467951	0.021264	-0.390041	0.0615466	0.0873601	0.235919	-0.197542	0.081515	0.0632785	0.19165	0.021903	0.0829195	0.0147308	-0.0184229	0.275812		0.111296	0.219482	0.0478949
-20.0393	0.240634	0.00842563	0.382009	0.484048	0.418443	-0.212866	0.484932	0.0217931	-0.379657	0.0568916	0.0821235	0.226742	-0.205941	0.0812056	0.0700499	0.174785	0.0184954	0.0920943	0.00652434	-0.0273363	0.268145		0.109121	0.219925	0.0479915
-19.941	0.224789	-0.0126978	0.369538	0.506826	0.407951	-0.203397	0.501152	0.014944	-0.365761	0.0546648	0.0692118	0.219858	-0.213597	0.0801057	0.0739344	0.15494	0.0121257	0.0918445	-0.00189553	-0.0402122	0.260065		0.104971	0.220513	0.0481198
-19.8427	0.210716	-0.0352556	0.352974	0.52854	0.40077	-0.196882	0.511532	0.00601184	-0.351582	0.0522856	0.0524514	0.21033	-0.216511	0.0757148	0.0779339	0.136505	0.00931737	0.0922048	-0.0126087	-0.0513246	0.252255		0.100256	0.220957	0.0482167
-19.7444	0.191988	-0.05685	0.333972	0.552495	0.383038	-0.19211	0.51835	-0.000558222	-0.331215	0.0444563	0.0347798	0.196326	-0.219693	0.0697119	0.0799374	0.114833	0.00471759	0.092139	-0.0213738	-0.0604712	0.24185		0.0941106	0.220222	0.0480563
-19.6461	0.173596	-0.0809033	0.316133	0.571789	0.366193	-0.193217	0.521843	-0.00408171	-0.309485	0.0344076	0.0146048	0.188273	-0.224297	0.0620119	0.0752853	0.0865306	-0.00209785	0.0860495	-0.0312099	-0.0715648	0.232278		0.0862923	0.220211	0.0480539
-19.5478	0.158959	-0.101428	0.291852	0.588671	0.343311	-0.192628	0.52454	-0.0120738	-0.287319	0.0184153	-0.00809221	0.176124	-0.226355	0.0557923	0.0679416	0.060451	-0.00562009	0.0789115	-0.0413536	-0.0779202	0.223986		0.0779126	0.219399	0.0478767
-19.4494	0.145256	-0.11639	0.269758	0.600127	0.321676	-0.192082	0.522845	-0.0155079	-0.26447	0.00813343	-0.0274674	0.159371	-0.224434	0.0417087	0.0601741	0.0372106	-0.0136466	0.0725091	-0.051874	-0.0804021	0.215831		0.0699203	0.21749	0.0474603
-19.3511	0.134298	-0.125024	0.250017	0.606538	0.308478	-0.191351	0.521818	-0.0104018	-0.243836	-0.000485071	-0.0472576	0.141943	-0.220433	0.024622	0.0553248	0.0175216	-0.0252345	0.0681901	-0.0636955	-0.078848	0.206465		0.063269	0.215668	0.0470627
-19.2528	0.122646	-0.13242	0.231147	0.608762	0.304639	-0.191348	0.51981	-0.00474946	-0.220048	-0.00411316	-0.0626776	0.126365	-0.214616	0.00800751	0.0511001	0.00182545	-0.0273214	0.0648267	-0.0758021	-0.0743889	0.197879		0.0585487	0.213443	0.046577
-19.1545	0.116118	-0.139298	0.213333	0.610219	0.298497	-0.190295	0.513065	-0.00420642	-0.198409	-0.00505787	-0.0736686	0.105932	-0.204658	-0.0123555	0.0494306	-0.0138691	-0.0261852	0.0578122	-0.0819428	-0.0668122	0.188363		0.0540958	0.21036	0.0459043
-19.0562	0.114107	-0.149296	0.199767	0.603585	0.294944	-0.189179	0.500069	-0.00921417	-0.174804	-0.00481655	-0.0908562	0.0831566	-0.194058	-0.0333043	0.0535503	-0.0303661	-0.0237968	0.0555695	-0.0867255	-0.059652	0.182263		0.0495687	0.206689	0.0451033
-18.9579	0.114088	-0.15682	0.180927	0.587426	0.296465	-0.191213	0.478765	-0.0236502	-0.158786	0.00422908	-0.114318	0.0636692	-0.183621	-0.0517205	0.0593463	-0.0387879	-0.0258211	0.0536758	-0.091866	-0.058416	0.178511		0.0439088	0.202389	0.044165
-18.8596	0.111222	-0.159865	0.166352	0.575165	0.295938	-0.194185	0.460324	-0.0323781	-0.143123	0.0168284	-0.135805	0.0405337	-0.174078	-0.0651411	0.0650764	-0.0465455	-0.027731	0.0491034	-0.0970232	-0.0583938	0.173961		0.0390588	0.198887	0.0434008
-18.7613	0.104358	-0.161157	0.158253	0.561496	0.295011	-0.195861	0.439561	-0.0440732	-0.129321	0.03483	-0.163657	0.0141724	-0.164327	-0.0826142	0.0694391	-0.0555898	-0.0307288	0.0437472	-0.102321	-0.0556487	0.169629		0.0335808	0.1959	0.0427489
-18.663	0.10403	-0.162003	0.15558	0.545634	0.297474	-0.205139	0.422361	-0.0486469	-0.116695	0.0546655	-0.194342	-0.0146154	-0.152575	-0.100602	0.0697946	-0.0624269	-0.0356306	0.0398685	-0.106194	-0.0526117	0.165935		0.0287554	0.194465	0.0424357
-18.5647	0.0973492	-0.162784	0.151185	0.525909	0.293323	-0.210914	0.400741	-0.0493833	-0.105459	0.0736303	-0.22876	-0.0443924	-0.139623	-0.118258	0.0689632	-0.0678716	-0.0427	0.0335678	-0.108038	-0.0472085	0.158248		0.0227393	0.191944	0.0418855
-18.4664	0.0891719	-0.163443	0.150104	0.501908	0.284798	-0.220827	0.376319	-0.0502297	-0.0858882	0.0960887	-0.256927	-0.0711979	-0.129642	-0.140372	0.0677421	-0.0700168	-0.0471095	0.0237514	-0.107811	-0.0413204	0.151299		0.0169713	0.188953	0.041233
-18.3681	0.0869093	-0.163913	0.147043	0.48066	0.278258	-0.232515	0.359016	-0.0542031	-0.0676971	0.120419	-0.282089	-0.097108	-0.119504	-0.16709	0.0621778	-0.0673524	-0.0559179	0.0147244	-0.107295	-0.0355435	0.145656		0.0116494	0.188171	0.0410622
-18.2698	0.0844388	-0.170268	0.14369	0.457431	0.274515	-0.244944	0.340984	-0.0658658	-0.0441745	0.147618	-0.30864	-0.122439	-0.107046	-0.192925	0.0585449	-0.0620225	-0.062571	0.00579626	-0.109693	-0.0285532	0.138643		0.00631039	0.188617	0.0411596
-18.1715	0.0845311	-0.171432	0.15032	0.436552	0.280147	-0.25671	0.3191	-0.0824281	-0.0200881	0.182453	-0.323236	-0.145083	-0.0946251	-0.21633	0.0643148	-0.0595626	-0.0659991	-0.00483816	-0.110871	-0.0225183	0.130415		0.00352905	0.19015	0.0414941
-18.0732	0.0854566	-0.167917	0.155674	0.422984	0.283648	-0.266053	0.294432	-0.0960588	0.00442135	0.223852	-0.333862	-0.161342	-0.0820332	-0.239579	0.0672011	-0.0595636	-0.0661418	-0.0221134	-0.111193	-0.0206225	0.125176		0.00173168	0.192587	0.0420258
-17.9749	0.0889239	-0.155918	0.16568	0.41001	0.288011	-0.281948	0.272093	-0.104211	0.0281842	0.265671	-0.341315	-0.172829	-0.0707463	-0.258707	0.0713739	-0.054018	-0.0636682	-0.0407504	-0.11148	-0.0191161	0.122387		0.0017918	0.195938	0.0427571
-17.8766	0.0878092	-0.135446	0.178424	0.400706	0.287284	-0.2976	0.247858	-0.104303	0.0511998	0.310328	-0.346118	-0.183268	-0.0596896	-0.274731	0.0772797	-0.0515034	-0.0598563	-0.0470556	-0.110913	-0.0147166	0.120251		0.00361615	0.199325	0.0434963
-17.7783	0.0832839	-0.109149	0.191491	0.395239	0.282502	-0.306438	0.229694	-0.10437	0.0730843	0.352389	-0.355559	-0.193649	-0.0525505	-0.287935	0.08197	-0.0506706	-0.0634255	-0.0541468	-0.10629	-0.011219	0.115091		0.00520683	0.20337	0.044379
-17.68	0.0816123	-0.0812827	0.202771	0.387731	0.278442	-0.317567	0.217105	-0.10808	0.0857661	0.393528	-0.363201	-0.199022	-0.0455394	-0.298324	0.091507	-0.0462502	-0.0655944	-0.065569	-0.101812	-0.0115567	0.107932		0.00679022	0.207826	0.0453514
-17.5817	0.0817336	-0.0518078	0.212012	0.382426	0.27283	-0.323389	0.207255	-0.110081	0.0928947	0.43868	-0.365646	-0.210712	-0.0381066	-0.302348	0.102364	-0.0414774	-0.062068	-0.0738499	-0.096015	-0.0122648	0.0968506		0.00948961	0.212137	0.0462922
-17.4834	0.0812632	-0.0277959	0.227185	0.3781	0.266244	-0.328506	0.199459	-0.10968	0.0927949	0.486362	-0.364926	-0.217468	-0.0290138	-0.306557	0.113458	-0.0362258	-0.0572338	-0.0783687	-0.090509	-0.0121851	0.0840583		0.0128788	0.216963	0.0473452
-17.3851	0.0830824	-0.00949402	0.240731	0.373841	0.255931	-0.329531	0.19642	-0.113032	0.0939916	0.52638	-0.365353	-0.219448	-0.0225368	-0.302861	0.129427	-0.0340308	-0.0535066	-0.0805033	-0.081411	-0.0131439	0.0728851		0.0165637	0.220771	0.0481762
-17.2868	0.0847795	0.00779626	0.255234	0.372019	0.246661	-0.331147	0.190711	-0.12013	0.0959967	0.566092	-0.362078	-0.220432	-0.0175661	-0.299226	0.147134	-0.039437	-0.0510286	-0.0838824	-0.0711152	-0.0184616	0.0637106		0.0197919	0.225238	0.049151
-17.1885	0.0858307	0.0274671	0.265909	0.372619	0.2284	-0.333589	0.18532	-0.128043	0.0921963	0.597823	-0.360278	-0.220829	-0.0152039	-0.295252	0.162945	-0.047296	-0.0555307	-0.0861237	-0.0608378	-0.0253571	0.0554522		0.0212201	0.22897	0.0499654
-17.0902	0.0880758	0.0398596	0.280256	0.368038	0.211314	-0.336687	0.181106	-0.132941	0.0850298	0.628342	-0.357356	-0.217502	-0.0155255	-0.284702	0.175551	-0.0559113	-0.0614775	-0.0878251	-0.0518245	-0.0318451	0.0482866		0.0224887	0.232074	0.0506427
-16.9918	0.0900972	0.0517475	0.293691	0.363325	0.192655	-0.339849	0.181759	-0.132942	0.0709103	0.655708	-0.343191	-0.213495	-0.0150726	-0.272351	0.185391	-0.0672492	-0.0683063	-0.0935673	-0.0421209	-0.0364938	0.0378649		0.0237386	0.234027	0.0510689
-16.8935	0.0937598	0.0636096	0.313147	0.36237	0.16858	-0.336643	0.187984	-0.131403	0.0589331	0.675621	-0.320251	-0.211503	-0.015401	-0.26095	0.192445	-0.0842293	-0.0767215	-0.104568	-0.0333347	-0.0392523	0.0251174		0.02511	0.235344	0.0513562
-16.7952	0.0964799	0.0687029	0.332518	0.358317	0.146846	-0.3339	0.185476	-0.13571	0.054535	0.696598	-0.29788	-0.209832	-0.0173791	-0.252003	0.196865	-0.0983791	-0.0861322	-0.120478	-0.0224899	-0.0423538	0.0114765		0.0252989	0.237348	0.0517935
-16.6969	0.096673	0.0695983	0.347447	0.353091	0.11743	-0.327822	0.182995	-0.142521	0.0530294	0.710939	-0.267545	-0.206637	-0.0237784	-0.23595	0.198622	-0.107537	-0.0947549	-0.133221	-0.00931743	-0.0461588	-0.00563449		0.025188	0.237052	0.051729
-16.5986	0.0943575	0.0693958	0.358896	0.346459	0.0869452	-0.317475	0.176379	-0.15476	0.0503846	0.717154	-0.230958	-0.202267	-0.0309771	-0.218209	0.196592	-0.117519	-0.10154	-0.143933	0.0056368	-0.0488098	-0.0238017		0.0243786	0.234991	0.0512791
-16.5003	0.096944	0.0651285	0.373727	0.339427	0.0626689	-0.315298	0.174805	-0.169454	0.0489745	0.719547	-0.194416	-0.198262	-0.0385144	-0.200188	0.192737	-0.131125	-0.104711	-0.151142	0.0191089	-0.0520678	-0.0374088		0.0238325	0.234078	0.05108
-16.402	0.0951554	0.0609631	0.385652	0.329181	0.0457914	-0.311267	0.173743	-0.18937	0.0426146	0.715013	-0.159784	-0.200043	-0.0421817	-0.179942	0.183623	-0.150526	-0.112327	-0.15763	0.0287839	-0.0545976	-0.0519256		0.0214726	0.232821	0.0508057
-16.3037	0.085751	0.0618607	0.397213	0.318411	0.0304313	-0.311361	0.162407	-0.20348	0.0361082	0.712545	-0.124369	-0.204217	-0.0442999	-0.152739	0.178163	-0.175369	-0.110022	-0.168962	0.0385217	-0.0599825	-0.0690013		0.0189337	0.232271	0.0506857
-16.2054	0.0759767	0.0671034	0.403786	0.311401	0.0116152	-0.31012	0.154393	-0.207471	0.0219062	0.710042	-0.0877018	-0.208326	-0.0480107	-0.121111	0.165336	-0.199295	-0.110278	-0.17936	0.051014	-0.0664755	-0.0844392		0.016666	0.231546	0.0505275
-16.1071	0.0672662	0.0674618	0.399191	0.303989	-0.0165342	-0.312863	0.145606	-0.212352	0.00484043	0.700746	-0.0519743	-0.211807	-0.0492862	-0.0886392	0.145996	-0.222051	-0.110866	-0.182799	0.0630464	-0.0705254	-0.0974231		0.0129058	0.229438	0.0500675
-16.0088	0.0620125	0.0689829	0.395737	0.286534	-0.034363	-0.314763	0.139404	-0.220683	-0.0135242	0.68581	-0.0160625	-0.218809	-0.0490066	-0.0573575	0.125231	-0.240871	-0.110505	-0.181944	0.0710784	-0.0713419	-0.109021		0.00935893	0.226701	0.0494701
-15.9105	0.0583292	0.0721029	0.388247	0.268461	-0.0479146	-0.314699	0.131415	-0.231458	-0.0365367	0.673692	0.0150092	-0.231364	-0.0479088	-0.0309977	0.0991321	-0.263301	-0.111765	-0.180336	0.0779619	-0.0690218	-0.118798		0.00477381	0.225138	0.0491292
-15.8122	0.0629157	0.074712	0.385075	0.247609	-0.0614672	-0.314495	0.124878	-0.247145	-0.0654843	0.654491	0.0461163	-0.247798	-0.0440888	-0.00612	0.0702466	-0.281049	-0.108591	-0.184242	0.0860963	-0.0666952	-0.12919		-0.000201191	0.224124	0.0489079
-15.7139	0.0693982	0.0768043	0.381096	0.21666	-0.0682752	-0.315127	0.112067	-0.25844	-0.0974658	0.633914	0.082301	-0.258519	-0.0386961	0.0176834	0.0406934	-0.295677	-0.100796	-0.186144	0.0913479	-0.0625026	-0.136708		-0.00458975	0.222256	0.0485003
-15.6156	0.0745246	0.0738678	0.376568	0.184394	-0.073502	-0.312302	0.0948629	-0.267417	-0.125487	0.611674	0.11946	-0.26916	-0.0321771	0.0399536	0.00775103	-0.307773	-0.0958538	-0.177705	0.0958102	-0.0539891	-0.13829		-0.00832339	0.219829	0.0479706
-15.5173	0.0751604	0.0671834	0.372909	0.148373	-0.0783384	-0.310455	0.080393	-0.281606	-0.149835	0.584778	0.154198	-0.275985	-0.0210637	0.0520133	-0.0208391	-0.315675	-0.09488	-0.16567	0.097949	-0.044645	-0.138972		-0.0126193	0.217247	0.0474072
-15.419	0.0753373	0.0613818	0.367781	0.109083	-0.0742922	-0.305878	0.0637824	-0.297888	-0.160979	0.558452	0.188497	-0.2823	-0.0119459	0.0621115	-0.0467669	-0.323206	-0.0988181	-0.156945	0.102843	-0.0390342	-0.14031		-0.0166235	0.2152	0.0469604
-15.3207	0.0739905	0.0558481	0.366804	0.0727658	-0.067538	-0.302798	0.0431157	-0.312749	-0.168175	0.535498	0.218416	-0.289793	-0.000170531	0.066518	-0.0761216	-0.326204	-0.101413	-0.149498	0.103886	-0.0349019	-0.141995		-0.0206911	0.214201	0.0467425
-15.2224	0.071108	0.0482581	0.362734	0.0344473	-0.0646231	-0.297331	0.0257369	-0.326466	-0.172683	0.509241	0.242812	-0.295598	0.0149252	0.0730407	-0.105503	-0.323259	-0.106031	-0.139411	0.105552	-0.0295689	-0.144954		-0.0246462	0.212422	0.0463543
-15.1241	0.0723102	0.0369178	0.36195	-0.00320282	-0.0599983	-0.286787	0.00873595	-0.339405	-0.17454	0.487855	0.267222	-0.299738	0.0316067	0.0822252	-0.134552	-0.319426	-0.106609	-0.128709	0.1084	-0.0243175	-0.147725		-0.0270375	0.211917	0.0462441
-15.0258	0.066166	0.0350723	0.360249	-0.0354949	-0.0522346	-0.275923	-0.00901377	-0.350624	-0.169597	0.465864	0.288248	-0.300522	0.0475003	0.0886268	-0.16496	-0.312538	-0.101525	-0.121294	0.110423	-0.0206887	-0.152448		-0.0287959	0.211141	0.0460747
-14.9275	0.0540973	0.0333624	0.357076	-0.0622993	-0.0401838	-0.263505	-0.0285402	-0.364335	-0.159557	0.445588	0.296683	-0.300233	0.0626201	0.0967918	-0.196471	-0.301136	-0.0947599	-0.112426	0.109846	-0.0173427	-0.156587		-0.0305386	0.209727	0.0457661
-14.8292	0.0399416	0.0355518	0.34734	-0.0906097	-0.0266291	-0.255065	-0.0524597	-0.375059	-0.144506	0.421986	0.296259	-0.300317	0.0787389	0.108438	-0.222645	-0.286403	-0.0814325	-0.0994112	0.108122	-0.0129167	-0.157211		-0.0318232	0.206927	0.0451551
-14.7309	0.0264157	0.0441346	0.335049	-0.120124	-0.0120267	-0.245783	-0.06828	-0.377953	-0.13946	0.38965	0.292616	-0.296719	0.0959596	0.121254	-0.242291	-0.274808	-0.0640309	-0.0841906	0.103957	-0.00852237	-0.157308		-0.0324982	0.202967	0.0442911
-14.6326	0.0205288	0.0550509	0.317332	-0.147144	0.00648349	-0.241059	-0.084358	-0.378483	-0.136825	0.358086	0.281659	-0.291737	0.116719	0.129458	-0.258283	-0.266217	-0.0530045	-0.0705189	0.0969404	-0.00566247	-0.152701		-0.0335113	0.19888	0.0433992
-14.5342	0.0152837	0.0676354	0.297972	-0.169785	0.0284803	-0.239611	-0.0970244	-0.376503	-0.132911	0.327814	0.267414	-0.285446	0.136694	0.136315	-0.272265	-0.25754	-0.0425903	-0.0583403	0.0859137	-0.00533004	-0.148685		-0.0344052	0.194879	0.042526
-14.4359	0.00954818	0.0866265	0.271638	-0.191564	0.0490803	-0.229198	-0.11423	-0.371197	-0.129182	0.295862	0.256144	-0.275489	0.153417	0.145132	-0.280972	-0.246116	-0.0343187	-0.0460273	0.0775214	-0.00360407	-0.147088		-0.034477	0.190199	0.0415049
-14.3376	0.00555945	0.10283	0.245147	-0.208942	0.0596184	-0.215712	-0.129197	-0.360749	-0.124076	0.262845	0.245567	-0.260579	0.165957	0.154834	-0.280474	-0.232633	-0.019845	-0.0306533	0.0722239	-0.00169262	-0.141995		-0.0329507	0.184155	0.040186
-14.2393	0.00601076	0.110824	0.220214	-0.226508	0.0669756	-0.194357	-0.140639	-0.352874	-0.117951	0.222438	0.234106	-0.241261	0.177603	0.161075	-0.282789	-0.217181	-0.0124966	-0.0100333	0.0663421	0.00392397	-0.136026		-0.0315525	0.177546	0.0387438
-14.141	0.00878446	0.118619	0.196189	-0.2447	0.0773873	-0.179534	-0.155736	-0.346963	-0.106302	0.178227	0.228018	-0.221316	0.18865	0.162465	-0.278633	-0.201729	-0.0059703	0.0073369	0.0613726	0.00997955	-0.131293		-0.030245	0.172062	0.0375469
-14.0427	0.00888428	0.126922	0.177192	-0.259628	0.0899628	-0.162804	-0.168331	-0.332184	-0.0913829	0.140143	0.215926	-0.200607	0.201125	0.162388	-0.269884	-0.185806	0.00549661	0.0158583	0.0578089	0.0112746	-0.129148		-0.0279425	0.166382	0.0363076
-13.9444	0.00944581	0.132943	0.156565	-0.265463	0.0957197	-0.143894	-0.173678	-0.308954	-0.0752275	0.103191	0.202941	-0.176758	0.212652	0.164057	-0.257367	-0.171955	0.0184857	0.0235022	0.0589376	0.0143002	-0.128186		-0.0242259	0.159402	0.0347843
-13.8461	0.0056615	0.135899	0.138902	-0.268622	0.0977156	-0.118898	-0.171041	-0.287202	-0.0545338	0.0593835	0.194303	-0.149289	0.223029	0.170714	-0.238628	-0.153291	0.0329405	0.0311209	0.0619673	0.0148539	-0.128714		-0.0192251	0.152154	0.0332026
-13.7478	-0.00661331	0.132845	0.118063	-0.269222	0.102393	-0.0911042	-0.166449	-0.264446	-0.0284987	0.0152827	0.183622	-0.120161	0.230368	0.179109	-0.216257	-0.136125	0.0426658	0.0345077	0.0644717	0.0141129	-0.129113		-0.014788	0.144688	0.0315734
-13.6495	-0.0119907	0.124218	0.0979948	-0.264953	0.106719	-0.0672982	-0.156994	-0.242218	-0.00110428	-0.0245056	0.171647	-0.0951499	0.236775	0.18729	-0.197962	-0.119482	0.051964	0.0340545	0.0667701	0.0107886	-0.129242		-0.0106037	0.138205	0.0301587
-13.5512	-0.018778	0.115281	0.079508	-0.256276	0.114551	-0.0444231	-0.150511	-0.219939	0.0265769	-0.0616408	0.1593	-0.0707772	0.241884	0.195461	-0.178575	-0.108269	0.0637476	0.0218311	0.0713007	0.00699998	-0.13459		-0.00701602	0.133405	0.0291113
-13.4529	-0.022517	0.107625	0.0578168	-0.240896	0.121827	-0.0206042	-0.148685	-0.194279	0.0536705	-0.10007	0.147211	-0.0474364	0.240281	0.206647	-0.165842	-0.0982971	0.0741481	0.00561594	0.0795054	0.0027508	-0.138409		-0.00380657	0.129782	0.0283208
-13.3546	-0.0258222	0.104975	0.0334958	-0.222671	0.121823	-0.0021338	-0.14693	-0.166262	0.0706699	-0.143344	0.133561	-0.0244003	0.236076	0.219048	-0.153106	-0.0929222	0.0877587	-0.00891734	0.0821265	0.000969208	-0.138782		-0.00165651	0.127235	0.0277649
-13.2563	-0.0276661	0.106265	0.00431612	-0.20764	0.126058	0.0117336	-0.141382	-0.134017	0.0840005	-0.187723	0.12173	-0.00193729	0.231677	0.239583	-0.13691	-0.092241	0.103598	-0.0239298	0.0834696	0.00153456	-0.137839		0.00107999	0.12759	0.0278424
-13.158	-0.0264632	0.110691	-0.0245054	-0.192964	0.131647	0.0249379	-0.135563	-0.102715	0.0930704	-0.230278	0.111264	0.0183659	0.223445	0.260709	-0.1244	-0.0931303	0.124789	-0.040924	0.0836854	0.00276593	-0.135585		0.00375439	0.130287	0.0284309
-13.0597	-0.0296857	0.115965	-0.0555034	-0.180316	0.140346	0.0293883	-0.127669	-0.0712132	0.102116	-0.274969	0.100267	0.0375907	0.214203	0.282959	-0.113262	-0.0907801	0.141895	-0.0589551	0.0844688	0.00293388	-0.134701		0.00547994	0.135338	0.0295331
-12.9614	-0.02687	0.11633	-0.0876329	-0.169421	0.149593	0.0329949	-0.114391	-0.0422013	0.103528	-0.320061	0.0898613	0.0499736	0.20519	0.305584	-0.0982631	-0.088258	0.151903	-0.0680528	0.084863	0.00426427	-0.130548		0.00706594	0.140839	0.0307337
-12.8631	-0.0169472	0.11765	-0.113579	-0.16122	0.152657	0.0329281	-0.101062	-0.0109191	0.105087	-0.368438	0.0828386	0.0618596	0.197839	0.322029	-0.0820778	-0.0856479	0.159355	-0.0777076	0.0843818	0.00243115	-0.126744		0.00831974	0.147245	0.0321316
-12.7648	-0.00597398	0.116619	-0.132176	-0.149229	0.153205	0.033794	-0.0839536	0.019643	0.0992418	-0.410786	0.0762109	0.0759504	0.189044	0.333258	-0.0743946	-0.0830248	0.159593	-0.0892317	0.0863364	-0.00209392	-0.127604		0.00878228	0.152811	0.0333461
-12.6665	0.00711287	0.110452	-0.153352	-0.134686	0.149848	0.034871	-0.0721686	0.0443218	0.0996306	-0.443909	0.0747776	0.0887756	0.180815	0.34431	-0.0739757	-0.077251	0.158943	-0.0965956	0.0896335	-0.00335728	-0.128037		0.00953139	0.158116	0.0345037
-12.5682	0.0115887	0.105794	-0.169172	-0.121834	0.146743	0.0410055	-0.0595179	0.0720327	0.0994757	-0.474666	0.0776851	0.0973154	0.16966	0.355471	-0.0759609	-0.0731225	0.168885	-0.098501	0.0960905	-0.0015218	-0.133143		0.0111575	0.164212	0.035834
-12.4699	0.0134275	0.104138	-0.18316	-0.113949	0.142559	0.0487609	-0.0504203	0.0994915	0.0999464	-0.50355	0.0791271	0.103734	0.156759	0.361108	-0.0752518	-0.0690011	0.180256	-0.10033	0.10616	0.000351212	-0.136042		0.0125769	0.17011	0.037121
-12.3716	0.0125756	0.0980968	-0.190826	-0.104972	0.136366	0.0513317	-0.038445	0.125162	0.100438	-0.525136	0.080376	0.10613	0.145594	0.361022	-0.0816813	-0.0608537	0.193077	-0.101238	0.112552	0.000164839	-0.136479		0.0134883	0.174039	0.0379784
-12.2733	0.0129099	0.0941105	-0.194921	-0.0932367	0.137356	0.0501804	-0.0247979	0.151384	0.0966146	-0.541876	0.0824253	0.108437	0.135723	0.359009	-0.0944277	-0.0439546	0.20086	-0.105289	0.117523	0.00027195	-0.139458		0.0147068	0.177341	0.038699
-12.175	0.0126174	0.0960558	-0.196111	-0.0797083	0.141351	0.0457296	-0.00977862	0.177916	0.0911432	-0.549488	0.0825632	0.10712	0.122769	0.354545	-0.106989	-0.0240456	0.210704	-0.110368	0.121508	-0.000662797	-0.142685		0.0163898	0.179339	0.0391351
-12.0766	0.0106621	0.100554	-0.197477	-0.0636723	0.142468	0.0504876	0.00295721	0.203047	0.0824706	-0.550069	0.0754871	0.104266	0.111944	0.351524	-0.119857	-0.00436216	0.218392	-0.109884	0.119922	-0.00163772	-0.147709		0.018072	0.180331	0.0393515
-11.9783	0.0112731	0.106109	-0.194177	-0.0502807	0.148043	0.0595911	0.0162183	0.220284	0.06952	-0.550935	0.073425	0.0995043	0.0963928	0.347917	-0.130932	0.0193271	0.21313	-0.10592	0.116424	0.00168091	-0.152426		0.0197223	0.180297	0.0393441
-11.88	0.00766548	0.112817	-0.18937	-0.0423569	0.156727	0.0661461	0.0204955	0.228358	0.053141	-0.547164	0.0756829	0.09336	0.0807137	0.342035	-0.143528	0.0440396	0.20394	-0.103298	0.109452	0.00206674	-0.159931		0.019571	0.179474	0.0391644
-11.7817	0.0123366	0.119988	-0.18877	-0.0343874	0.168454	0.05916	0.0166922	0.239556	0.0334468	-0.538282	0.0745059	0.0880243	0.0633773	0.332591	-0.156201	0.0629162	0.191678	-0.0997914	0.0998534	0.0032033	-0.168771		0.0180752	0.178134	0.038872
-11.6834	0.0225221	0.131652	-0.186642	-0.0293537	0.182255	0.048349	0.0123385	0.250363	0.0117535	-0.521882	0.0764506	0.0821609	0.0447019	0.320386	-0.169992	0.084906	0.17917	-0.0860002	0.0891616	0.00329641	-0.178081		0.0175007	0.176002	0.0384068
-11.5851	0.0247051	0.146086	-0.183853	-0.0186759	0.189186	0.0364243	0.00950546	0.257826	-0.0102106	-0.510093	0.0786168	0.0733135	0.0267629	0.308579	-0.177106	0.104523	0.166496	-0.0680834	0.0803845	0.00316928	-0.188676		0.0166133	0.174369	0.0380505
-11.4868	0.0286112	0.166734	-0.180206	-0.0111052	0.19601	0.0269469	0.0108887	0.268463	-0.0303242	-0.496969	0.0790017	0.061531	0.0105639	0.295477	-0.186361	0.128292	0.153535	-0.0433204	0.0703573	0.00341684	-0.195377		0.0169603	0.173429	0.0378453
-11.3885	0.0320206	0.185537	-0.172496	-0.00622281	0.201504	0.0167732	0.0138012	0.278348	-0.0485735	-0.472455	0.0811074	0.0489061	-0.00071698	0.285859	-0.191709	0.152687	0.144	-0.0170343	0.0585565	0.00569458	-0.204438		0.0186261	0.171703	0.0374686
-11.2902	0.0360783	0.201072	-0.156313	0.0017264	0.209621	0.0087524	0.0225384	0.292496	-0.0647177	-0.441218	0.0864208	0.0320476	-0.00634629	0.277417	-0.19696	0.184057	0.135427	0.00439206	0.0523668	0.00673774	-0.216723		0.0223273	0.170562	0.0372198
-11.1919	0.0392679	0.210951	-0.134003	0.0164141	0.213833	0.00411036	0.0294039	0.299337	-0.0822673	-0.409023	0.0935431	0.0151582	-0.0134069	0.259094	-0.207857	0.219463	0.125579	0.025238	0.0502435	0.00718961	-0.231762		0.0252622	0.169242	0.0369316
-11.0936	0.0392033	0.215725	-0.107544	0.0348497	0.21529	0.000581694	0.036317	0.303727	-0.0999764	-0.374343	0.099335	0.000570115	-0.0187356	0.237843	-0.214017	0.254103	0.111372	0.0456669	0.0479725	0.0107045	-0.246473		0.0281987	0.167477	0.0365464
-10.9953	0.0395141	0.216314	-0.0783582	0.0561752	0.215337	0.00484617	0.0383734	0.308088	-0.120002	-0.339806	0.105109	-0.0149865	-0.0229305	0.211165	-0.217513	0.285971	0.0976113	0.0667064	0.0418515	0.0165068	-0.257721		0.0310596	0.165895	0.0362013
-10.897	0.0394742	0.217096	-0.0463874	0.0778207	0.217432	0.00676413	0.0333672	0.315958	-0.134379	-0.299373	0.114763	-0.0263661	-0.0250792	0.183832	-0.224165	0.311975	0.0899639	0.0795078	0.0362647	0.0229188	-0.269997		0.034352	0.165196	0.0360487
-10.7987	0.0394767	0.214269	-0.0217701	0.0986665	0.223732	0.010577	0.0292095	0.322438	-0.147195	-0.252387	0.125418	-0.0379432	-0.0284173	0.161366	-0.230788	0.335506	0.0862016	0.0922792	0.0349581	0.0310939	-0.278559		0.0384824	0.165113	0.0360305
-10.7004	0.0408849	0.207265	-0.00206256	0.118326	0.231033	0.0130127	0.0224154	0.323276	-0.160008	-0.206542	0.14609	-0.049951	-0.0296474	0.140329	-0.229599	0.355865	0.0874269	0.103533	0.0336604	0.0425773	-0.282432		0.0431168	0.164932	0.0359911
-10.6021	0.0376717	0.202045	0.0240682	0.137139	0.241191	0.014314	0.0161438	0.329482	-0.176174	-0.16241	0.1629	-0.064107	-0.0331368	0.11822	-0.224123	0.371239	0.0852352	0.109513	0.0323104	0.0495089	-0.285198		0.0469443	0.165877	0.0361974
-10.5038	0.0423086	0.192861	0.051725	0.157503	0.254506	0.0102059	0.0091458	0.333459	-0.183034	-0.116351	0.178736	-0.0752297	-0.0364844	0.0947962	-0.212833	0.388261	0.0731612	0.108636	0.0269779	0.0544721	-0.285275		0.0508357	0.166418	0.0363154
-10.4055	0.0517305	0.177071	0.0786348	0.180309	0.262347	0.00318271	0.00885729	0.335892	-0.192279	-0.0712709	0.197319	-0.0875347	-0.0367399	0.078703	-0.200559	0.403093	0.0558067	0.105509	0.0179755	0.0623893	-0.287721		0.054415	0.167961	0.036652
-10.3072	0.0625048	0.167086	0.104119	0.201142	0.274156	-0.00182876	0.0100642	0.342333	-0.198017	-0.0337112	0.209638	-0.0952999	-0.0358416	0.0657447	-0.181977	0.411796	0.0370909	0.0983553	0.00878204	0.0732965	-0.288931		0.0585953	0.169753	0.0370431
-10.2089	0.073376	0.155911	0.125842	0.215993	0.283158	-0.00189095	0.00944293	0.347676	-0.196217	-0.00273852	0.214212	-0.10525	-0.0351919	0.0570795	-0.160408	0.411623	0.017569	0.0919005	3.75822e-05	0.0830653	-0.289197		0.061714	0.170122	0.0371237
-10.1106	0.087419	0.139826	0.14389	0.224168	0.287916	-0.000828168	0.011426	0.350405	-0.192077	0.0214962	0.218219	-0.112488	-0.0315248	0.0484878	-0.132236	0.410878	0.00198129	0.0827046	-0.0073523	0.0886558	-0.288612		0.0643978	0.169341	0.0369533
-10.0123	0.100638	0.118335	0.165307	0.222013	0.290639	-0.00830763	0.021016	0.354246	-0.187592	0.0436281	0.221894	-0.118851	-0.0309893	0.0385127	-0.104	0.410475	-0.00374074	0.0706037	-0.00978374	0.0965335	-0.282348		0.0670585	0.16806	0.0366736
-9.91396	0.110056	0.0953042	0.180232	0.218213	0.282445	-0.0180175	0.0315136	0.362546	-0.177187	0.0606752	0.219838	-0.12277	-0.0278576	0.0284823	-0.0803194	0.402509	0.000321411	0.056752	-0.0116523	0.101302	-0.273406		0.0685229	0.165058	0.0360185
-9.81565	0.121575	0.0651264	0.195003	0.216555	0.270878	-0.0263057	0.0457578	0.374615	-0.162155	0.0768756	0.209082	-0.125898	-0.0280702	0.0165957	-0.0566993	0.392896	0.00329252	0.0447377	-0.0102581	0.104604	-0.260365		0.0698973	0.161704	0.0352866
-9.71735	0.126396	0.0312217	0.216801	0.213611	0.256985	-0.0233463	0.0639966	0.385408	-0.141728	0.092311	0.197284	-0.129556	-0.0264011	0.00754472	-0.034136	0.385092	0.0106812	0.030499	-0.00544512	0.10908	-0.244863		0.0724493	0.15827	0.0345373
-9.61905	0.128646	-0.00477475	0.239585	0.210779	0.238309	-0.0208224	0.080213	0.399323	-0.119044	0.104102	0.178594	-0.128196	-0.0196211	-0.0030464	-0.0119599	0.371208	0.0156399	0.00498227	-0.000340156	0.114041	-0.227992		0.0737918	0.154934	0.0338094
-9.52074	0.127259	-0.0388389	0.259587	0.199692	0.219093	-0.0109804	0.0858942	0.41565	-0.0956572	0.116076	0.156366	-0.117739	-0.0154883	-0.0125173	0.00482679	0.359076	0.0169182	-0.0214345	0.00501141	0.118668	-0.208384		0.0744323	0.152043	0.0331784
-9.42244	0.127063	-0.0764949	0.278428	0.191042	0.191395	-0.000338408	0.0858043	0.425947	-0.0751418	0.123382	0.133967	-0.102214	-0.0126373	-0.0169698	0.023407	0.344096	0.0192047	-0.0520718	0.0099561	0.123314	-0.189728		0.0738767	0.149582	0.0326415
-9.32413	0.127566	-0.106557	0.293995	0.178317	0.166406	0.0112113	0.0870746	0.437354	-0.0531987	0.120132	0.107918	-0.084977	-0.013303	-0.0221381	0.0447396	0.327455	0.0210265	-0.0873425	0.0138161	0.124415	-0.166458		0.0727358	0.147827	0.0322585
-9.22583	0.123393	-0.135484	0.301052	0.160259	0.140556	0.0264827	0.0824454	0.442864	-0.0263354	0.11419	0.0770118	-0.0618175	-0.020542	-0.0276487	0.0626448	0.306414	0.0193813	-0.110073	0.0155195	0.123826	-0.141914		0.070106	0.144874	0.0316141
-9.12753	0.115308	-0.160128	0.300194	0.132952	0.117264	0.0443183	0.0795508	0.449367	0.00279744	0.106817	0.0419252	-0.0364513	-0.0267241	-0.028433	0.0835284	0.279518	0.0181377	-0.12831	0.0157667	0.123272	-0.116306		0.0673507	0.141815	0.0309466
-9.02922	0.109699	-0.179956	0.293537	0.100869	0.097333	0.0571584	0.0766716	0.461891	0.0378457	0.0960979	0.00717252	-0.0134294	-0.0359657	-0.0292609	0.104082	0.251133	0.0191742	-0.147196	0.0169046	0.118108	-0.0908291		0.0643353	0.140961	0.0307602
-8.93092	0.1034	-0.194218	0.284902	0.0637627	0.0765825	0.0687914	0.0748765	0.472807	0.0782077	0.0855852	-0.0328153	0.0126919	-0.0473358	-0.0310641	0.12373	0.220883	0.0199049	-0.166131	0.0224854	0.10959	-0.0686413		0.0608569	0.141897	0.0309644
-8.83261	0.0951596	-0.207104	0.271681	0.0246604	0.0518491	0.0851156	0.0756924	0.477009	0.117255	0.0663008	-0.0814634	0.0395822	-0.0601058	-0.0354779	0.146159	0.198066	0.0099119	-0.180492	0.0282809	0.0995524	-0.0475436		0.055909	0.144977	0.0316365
-8.73431	0.0808066	-0.217604	0.258455	-0.0127543	0.0258272	0.102625	0.0726489	0.479747	0.152753	0.0407655	-0.129007	0.0666743	-0.0754046	-0.0417212	0.168814	0.176502	-0.0061784	-0.193189	0.0330917	0.0880984	-0.0282986		0.0496501	0.150537	0.0328498
-8.63601	0.0597266	-0.224441	0.244771	-0.0507081	0.00184569	0.12484	0.071682	0.486751	0.195511	0.00997578	-0.185717	0.0913748	-0.0915735	-0.0482493	0.189386	0.156881	-0.0228398	-0.198471	0.0372156	0.0736181	-0.0112201		0.0433504	0.159436	0.0347917
-8.5377	0.0396762	-0.229451	0.223712	-0.0932379	-0.0257766	0.147982	0.0724545	0.486773	0.239078	-0.0235073	-0.24244	0.117331	-0.107382	-0.0585376	0.207607	0.143792	-0.0369003	-0.196684	0.0408598	0.0610441	0.00471424		0.0367194	0.169574	0.0370041
-8.4394	0.0136184	-0.228249	0.198086	-0.132605	-0.0612288	0.174738	0.0745349	0.483515	0.269148	-0.0587293	-0.296982	0.143789	-0.123189	-0.0650828	0.216247	0.133908	-0.0439572	-0.191775	0.0489005	0.0478051	0.0210954		0.0296946	0.179538	0.0391784
-8.34109	-0.0162375	-0.223401	0.172424	-0.170784	-0.0891204	0.206677	0.0681525	0.477387	0.299329	-0.0909117	-0.352172	0.173679	-0.139298	-0.077562	0.220218	0.12815	-0.045777	-0.184091	0.0614295	0.031286	0.0396519		0.0232871	0.190935	0.0416655
-8.24279	-0.0475956	-0.226753	0.144993	-0.2069	-0.118845	0.240522	0.0567163	0.462948	0.319816	-0.116182	-0.402407	0.201057	-0.157003	-0.0896738	0.220983	0.124606	-0.048108	-0.171445	0.078363	0.0124241	0.0543024		0.0158009	0.202122	0.0441067
-8.14449	-0.0753317	-0.227352	0.118325	-0.239643	-0.151029	0.270729	0.0449157	0.443721	0.33295	-0.133156	-0.442833	0.229802	-0.175286	-0.104326	0.220601	0.119441	-0.0422641	-0.154883	0.0958855	-0.0061358	0.066891		0.00909624	0.211973	0.0462563
-8.04618	-0.109499	-0.223335	0.0919793	-0.265865	-0.1772	0.299211	0.0293666	0.423675	0.343187	-0.1478	-0.478945	0.259373	-0.192568	-0.118109	0.212505	0.109564	-0.0434959	-0.133198	0.113497	-0.0189625	0.0802497		0.00255384	0.221032	0.0482332
-7.94788	-0.142365	-0.215128	0.059647	-0.282394	-0.199385	0.334417	0.0038214	0.40158	0.349955	-0.161879	-0.509743	0.289526	-0.207981	-0.129098	0.201562	0.0978413	-0.0540323	-0.11053	0.128129	-0.0340454	0.0896759		-0.00430606	0.229445	0.050069
-7.84957	-0.171518	-0.205302	0.0308589	-0.29613	-0.208607	0.368072	-0.0229543	0.373912	0.349154	-0.173178	-0.534634	0.315851	-0.225773	-0.138657	0.190061	0.0923344	-0.0635932	-0.0846231	0.142955	-0.0476177	0.0958265		-0.0101696	0.236321	0.0515696
-7.75127	-0.200815	-0.183178	0.0021052	-0.305581	-0.217911	0.396286	-0.0511024	0.3453	0.344453	-0.19021	-0.555349	0.337183	-0.238385	-0.14692	0.178487	0.0847822	-0.0704592	-0.0622816	0.155548	-0.055105	0.100947		-0.0158194	0.241921	0.0527914
-7.65297	-0.229665	-0.153117	-0.0327125	-0.3145	-0.22611	0.416127	-0.0836114	0.315019	0.338764	-0.209449	-0.56885	0.356631	-0.24828	-0.158216	0.159976	0.0752076	-0.0764938	-0.0398912	0.165921	-0.0635858	0.104653		-0.0224849	0.246245	0.053735
-7.55466	-0.258391	-0.117926	-0.0720226	-0.319828	-0.233224	0.4344	-0.113922	0.279691	0.333785	-0.230656	-0.571451	0.369605	-0.264104	-0.162513	0.142476	0.0695172	-0.0754199	-0.012265	0.175463	-0.0718495	0.109429		-0.0280574	0.249643	0.0544766
-7.45636	-0.279333	-0.0842719	-0.108967	-0.321487	-0.232918	0.447488	-0.135416	0.237645	0.329006	-0.246587	-0.570129	0.374223	-0.277463	-0.167001	0.131629	0.0606366	-0.0701678	0.0105046	0.183982	-0.0783257	0.111842		-0.0326243	0.251174	0.0548107
-7.35805	-0.300288	-0.0499744	-0.143795	-0.323641	-0.226511	0.453753	-0.152138	0.195459	0.324269	-0.257532	-0.568411	0.373591	-0.290733	-0.176031	0.122328	0.0530409	-0.0655995	0.0364559	0.192282	-0.0861579	0.113192		-0.0369735	0.252435	0.0550859
-7.25975	-0.324397	-0.020189	-0.173733	-0.31907	-0.222803	0.456065	-0.168068	0.148786	0.316004	-0.262253	-0.560227	0.371031	-0.301581	-0.187713	0.107579	0.0491405	-0.0604986	0.070563	0.201078	-0.0902255	0.11202		-0.0408805	0.252666	0.0551363
-7.16145	-0.343496	0.00868956	-0.202528	-0.314451	-0.220326	0.453499	-0.183851	0.0993078	0.299953	-0.266271	-0.548924	0.363913	-0.3071	-0.19989	0.0929552	0.0445925	-0.052228	0.0925373	0.208246	-0.0896163	0.110445		-0.0454544	0.251363	0.0548518
-7.06314	-0.356668	0.0379124	-0.227729	-0.30654	-0.218309	0.447762	-0.203268	0.0534547	0.283548	-0.270692	-0.530163	0.353712	-0.311831	-0.213989	0.0767679	0.0480985	-0.0476771	0.110465	0.214453	-0.0896902	0.108719		-0.049603	0.249433	0.0544308
-6.96484	-0.372152	0.0596565	-0.252126	-0.296176	-0.213425	0.448543	-0.225188	0.00152437	0.26434	-0.273584	-0.508757	0.344287	-0.311941	-0.224999	0.0572662	0.0573191	-0.0437938	0.128943	0.222529	-0.0881246	0.104769		-0.0533852	0.248265	0.0541758
-6.86653	-0.384232	0.0778624	-0.276716	-0.282627	-0.209513	0.445304	-0.245902	-0.0460602	0.235778	-0.276548	-0.481655	0.328491	-0.308617	-0.229595	0.0368957	0.0669636	-0.0358639	0.144534	0.227286	-0.0824063	0.10171		-0.0569005	0.245306	0.0535302
-6.76823	-0.39305	0.095059	-0.298149	-0.26682	-0.207126	0.436273	-0.26564	-0.0893264	0.203797	-0.271719	-0.44746	0.311283	-0.304122	-0.232601	0.0158505	0.0733602	-0.0174388	0.162057	0.23109	-0.0761085	0.0981965		-0.0591711	0.241225	0.0526395
-6.66993	-0.401741	0.114739	-0.315686	-0.250564	-0.20407	0.424541	-0.281737	-0.13422	0.172751	-0.264379	-0.411472	0.295108	-0.295425	-0.232682	-0.00465922	0.0803209	0.00763289	0.181175	0.232014	-0.0668361	0.0940825		-0.0600526	0.237507	0.0518282
-6.57162	-0.399663	0.135156	-0.330636	-0.235013	-0.200066	0.40982	-0.297567	-0.17652	0.136626	-0.24802	-0.373141	0.280374	-0.287307	-0.227323	-0.024978	0.084645	0.0305736	0.190111	0.231307	-0.0557458	0.0891034		-0.0603935	0.232512	0.0507383
-6.47332	-0.38847	0.153021	-0.339948	-0.212831	-0.186705	0.394708	-0.309792	-0.216169	0.0976395	-0.229391	-0.331417	0.266643	-0.278683	-0.215802	-0.040264	0.0856136	0.0530658	0.196644	0.231266	-0.0437344	0.084983		-0.0585534	0.226455	0.0494165
-6.37501	-0.37116	0.167225	-0.346002	-0.194517	-0.162571	0.372939	-0.320852	-0.249844	0.0656916	-0.215698	-0.290914	0.250438	-0.264718	-0.206144	-0.0486894	0.0809726	0.0703459	0.201856	0.228758	-0.0318012	0.0788687		-0.0564675	0.219539	0.0479073
-6.27671	-0.353189	0.179911	-0.346914	-0.179925	-0.144194	0.34434	-0.327797	-0.275091	0.0396653	-0.199521	-0.252972	0.234872	-0.253861	-0.189202	-0.053882	0.0719482	0.0844359	0.208075	0.224356	-0.0187225	0.0717253		-0.0540924	0.212244	0.0463154
-6.17841	-0.332454	0.200135	-0.346042	-0.166827	-0.130961	0.311252	-0.330442	-0.292741	0.0210372	-0.183502	-0.210424	0.21937	-0.242771	-0.173265	-0.0573882	0.0615876	0.096657	0.209484	0.214725	-0.00590965	0.0669687		-0.0510243	0.204569	0.0446405
-6.0801	-0.318021	0.218807	-0.345718	-0.155384	-0.114037	0.277347	-0.3301	-0.304519	0.0077843	-0.172781	-0.171403	0.202214	-0.230124	-0.158149	-0.0562509	0.0538351	0.0978565	0.208119	0.203065	0.00784671	0.0657274		-0.0482804	0.197372	0.0430702
-5.9818	-0.295933	0.234219	-0.344686	-0.145785	-0.100769	0.243065	-0.326348	-0.312686	-0.00207869	-0.159656	-0.137093	0.180897	-0.221361	-0.142541	-0.050109	0.0496097	0.100954	0.198903	0.191224	0.0182604	0.0655631		-0.0455406	0.189575	0.0413686
-5.88349	-0.273941	0.250572	-0.332577	-0.138921	-0.0911599	0.204239	-0.312612	-0.322497	-0.00407031	-0.149309	-0.105751	0.160685	-0.210331	-0.130686	-0.0449446	0.046135	0.105692	0.188757	0.181628	0.028256	0.0643464		-0.0422138	0.181472	0.0396005
-5.78519	-0.252698	0.265018	-0.320772	-0.131731	-0.0876143	0.165623	-0.299505	-0.323464	3.11656e-05	-0.139193	-0.076373	0.146101	-0.197938	-0.121305	-0.0390571	0.0418801	0.106441	0.176341	0.167809	0.0389616	0.0633102		-0.0389588	0.173444	0.0378487
-5.68689	-0.231289	0.272085	-0.307893	-0.129551	-0.0818396	0.135012	-0.285337	-0.323633	0.00879254	-0.127633	-0.0501928	0.136231	-0.187817	-0.110282	-0.0330018	0.0432381	0.106589	0.165368	0.152236	0.0416521	0.0631133		-0.0354358	0.166084	0.0362425
-5.58858	-0.207023	0.27269	-0.29028	-0.12789	-0.0799163	0.110632	-0.264769	-0.323054	0.012987	-0.111759	-0.0316232	0.127559	-0.183345	-0.096632	-0.0176132	0.0473902	0.101628	0.156558	0.138675	0.0439027	0.0626506		-0.031392	0.158204	0.0345229
-5.49028	-0.179125	0.265974	-0.268344	-0.1307	-0.0810571	0.0923826	-0.247401	-0.315844	0.0120854	-0.0903822	-0.0192184	0.121845	-0.176028	-0.0880098	-0.00198661	0.0542034	0.0926445	0.148178	0.125007	0.0481087	0.059101		-0.0275508	0.14948	0.0326191
-5.39197	-0.15263	0.255972	-0.245748	-0.133555	-0.0877559	0.0735887	-0.228984	-0.299251	0.00984284	-0.0681098	-0.00321345	0.116144	-0.166319	-0.0774542	0.00700121	0.0629017	0.0806805	0.145425	0.110242	0.0504928	0.0572638		-0.0234984	0.140084	0.0305688
-5.29367	-0.127964	0.244774	-0.225026	-0.14155	-0.0935982	0.0620782	-0.212368	-0.278638	0.00744461	-0.046505	0.0171807	0.113472	-0.155329	-0.0679651	0.00974279	0.0688012	0.0694814	0.143965	0.097574	0.0516352	0.0549396		-0.0194216	0.131677	0.0287344
-5.19537	-0.0951254	0.232933	-0.205931	-0.153866	-0.0965631	0.051817	-0.199627	-0.25105	0.00341091	-0.0305248	0.033931	0.113774	-0.147717	-0.0600625	0.0140822	0.0710558	0.0588224	0.135103	0.0850751	0.0499499	0.050507		-0.0161907	0.123149	0.0268734
-5.09706	-0.0650087	0.221991	-0.182845	-0.165865	-0.0975225	0.0418556	-0.183877	-0.217516	0.00193237	-0.015225	0.0509439	0.114912	-0.139746	-0.0514353	0.0231186	0.0726583	0.0460615	0.128251	0.0735039	0.0440374	0.0450737		-0.0121287	0.114583	0.0250041
-4.99876	-0.0355967	0.208518	-0.158527	-0.175057	-0.103293	0.0328661	-0.165868	-0.184718	0.00139249	0.00316148	0.0639815	0.115972	-0.132118	-0.0421475	0.0311441	0.0655055	0.0358953	0.12295	0.0617716	0.0385978	0.0386042		-0.00842693	0.106383	0.0232146
-4.90045	-0.00342304	0.202025	-0.133044	-0.183314	-0.120549	0.0186297	-0.148483	-0.147248	-0.00230693	0.025829	0.0762177	0.116328	-0.125098	-0.0346133	0.0378828	0.0543231	0.0261729	0.118025	0.0472638	0.0347038	0.0353721		-0.00501462	0.100181	0.0218614
-4.80215	0.0261452	0.194992	-0.106234	-0.192947	-0.138227	0.00761798	-0.130871	-0.114763	0.005279	0.0525242	0.0910442	0.119081	-0.120976	-0.0279313	0.0459199	0.0430872	0.00984005	0.115096	0.0343675	0.0276984	0.0315358		-0.00132002	0.0969951	0.0211661
-4.70385	0.0556451	0.182215	-0.0792576	-0.200567	-0.152647	0.0011101	-0.116613	-0.0825868	0.016807	0.0731944	0.107068	0.121189	-0.117774	-0.0191097	0.0517667	0.0295081	-0.00780447	0.102676	0.0225355	0.0224431	0.0289888		0.00184698	0.09474	0.020674
-4.60554	0.0920455	0.166178	-0.0510242	-0.210262	-0.166211	-0.00522267	-0.100401	-0.0422104	0.0294282	0.0944284	0.117244	0.119141	-0.113951	-0.0122865	0.0558144	0.0133786	-0.0279699	0.0850297	0.0131275	0.0163803	0.0265062		0.00472205	0.0939244	0.020496
-4.50724	0.118038	0.149538	-0.0195168	-0.217892	-0.179493	-0.00938741	-0.087016	-0.00410498	0.0443235	0.112421	0.126829	0.115932	-0.109411	-0.012379	0.0571404	0.00276248	-0.0458795	0.0735453	0.0063266	0.00803435	0.0245469		0.00735041	0.0952839	0.0207926
-4.40893	0.131877	0.13285	0.0124555	-0.226192	-0.201738	-0.0134769	-0.0813076	0.0332063	0.0663352	0.128093	0.133836	0.110187	-0.104333	-0.0133363	0.0500151	-0.0104059	-0.0643285	0.0588073	-0.00273516	-0.00112748	0.0221134		0.00765696	0.099127	0.0216313
-4.31063	0.140572	0.115609	0.0455784	-0.233777	-0.230052	-0.0111039	-0.0766571	0.0678944	0.0861596	0.151681	0.137826	0.103808	-0.105176	-0.00971021	0.0412569	-0.0210557	-0.079932	0.0453199	-0.0121404	-0.00823426	0.0211061		0.00804633	0.105703	0.0230663
-4.21233	0.148962	0.0953665	0.0728917	-0.236649	-0.25487	-0.00139732	-0.070874	0.0952828	0.101955	0.16984	0.143178	0.094455	-0.101495	-0.0105325	0.0288036	-0.0275755	-0.0896674	0.0294562	-0.0210664	-0.0159338	0.0218925		0.00819156	0.111484	0.0243278
-4.11402	0.155798	0.0688211	0.100643	-0.238762	-0.270814	0.0117421	-0.0637523	0.115143	0.113481	0.18287	0.139366	0.0869793	-0.0938016	-0.00930496	0.0106918	-0.0327474	-0.0926245	0.0203895	-0.0285593	-0.0235468	0.023102		0.00833878	0.115421	0.025187
-4.01572	0.165774	0.0402808	0.13057	-0.241325	-0.280477	0.0260216	-0.0575461	0.134042	0.120832	0.198989	0.137492	0.0833996	-0.0860949	-0.00803468	-0.0160104	-0.0343883	-0.0889476	0.0111373	-0.0346569	-0.0323356	0.020905		0.00902979	0.120117	0.0262118
-3.91741	0.169712	0.0102154	0.161541	-0.245629	-0.291257	0.0424949	-0.0571851	0.152386	0.1244	0.213757	0.136462	0.082767	-0.0748354	-0.00911656	-0.0448266	-0.0363655	-0.0811616	0.00888643	-0.0430156	-0.0393886	0.0140821		0.00923447	0.125848	0.0274624
-3.81911	0.171301	-0.0218863	0.18283	-0.250934	-0.296606	0.0627112	-0.0627923	0.171119	0.121171	0.224194	0.135095	0.0784224	-0.0660775	-0.00745296	-0.068663	-0.0369072	-0.0645575	0.00662842	-0.0526303	-0.0475173	0.0105955		0.00895447	0.130724	0.0285263
-3.72081	0.172899	-0.0519216	0.204387	-0.260374	-0.29751	0.0834846	-0.0708785	0.178118	0.119196	0.233675	0.132986	0.0702992	-0.055824	-0.00111901	-0.0923996	-0.0415828	-0.0477031	0.00478392	-0.0585013	-0.0572005	0.0102205		0.00833511	0.135726	0.0296178
-3.6225	0.172989	-0.0837032	0.223015	-0.271535	-0.299983	0.10176	-0.0792488	0.181955	0.114671	0.24559	0.139556	0.060641	-0.0454174	0.00554356	-0.114429	-0.0515377	-0.0331166	0.00513996	-0.0626134	-0.0611973	0.00790429		0.00742776	0.141805	0.0309445
-3.5242	0.169028	-0.112268	0.240106	-0.284175	-0.298563	0.12128	-0.0937542	0.18591	0.111646	0.253595	0.149784	0.050672	-0.0297502	0.0105417	-0.14111	-0.0603794	-0.0139897	0.00575226	-0.0695399	-0.0643611	0.00496549		0.00644712	0.148239	0.0323485
-3.42589	0.16266	-0.139021	0.255205	-0.29477	-0.2914	0.135999	-0.101703	0.183906	0.11093	0.254841	0.158741	0.0396885	-0.0135665	0.013183	-0.166597	-0.073837	0.00858582	0.004746	-0.0764275	-0.0667653	0.00406178		0.00516474	0.153191	0.033429
-3.32759	0.154448	-0.159722	0.266102	-0.306919	-0.28358	0.15277	-0.114414	0.176987	0.107182	0.245054	0.158087	0.0308421	-0.00123928	0.0110195	-0.185319	-0.0869019	0.0351715	0.00191502	-0.0827107	-0.0671666	0.00149108		0.00252843	0.156526	0.0341567
-3.22929	0.148614	-0.18027	0.275487	-0.313791	-0.275173	0.163766	-0.125289	0.169909	0.103342	0.235141	0.154358	0.0234345	0.00994717	0.0101337	-0.197204	-0.098437	0.0610962	-0.00492068	-0.0938342	-0.0654007	0.000611106		7.24218e-05	0.159167	0.034733
-3.13098	0.135959	-0.198966	0.277306	-0.322903	-0.268797	0.179237	-0.132797	0.156602	0.100382	0.226136	0.151593	0.0114123	0.024774	0.0132202	-0.208736	-0.110325	0.0861171	-0.00996616	-0.10701	-0.0620045	0.00299485		-0.00265579	0.161732	0.0352928
-3.03268	0.124941	-0.219072	0.274003	-0.327581	-0.264998	0.195852	-0.141801	0.137498	0.0956254	0.216499	0.151145	0.000551076	0.0364233	0.0159436	-0.219902	-0.120599	0.11222	-0.0117783	-0.118413	-0.0578129	0.0085328		-0.0053677	0.164243	0.0358408
-2.93437	0.109578	-0.239828	0.26513	-0.331282	-0.257087	0.208954	-0.150412	0.116429	0.0887014	0.207491	0.152726	-0.00887219	0.0494611	0.0206022	-0.226623	-0.124888	0.137417	-0.0146193	-0.128302	-0.0552457	0.0169088		-0.00779815	0.165798	0.0361802
-2.83607	0.0922997	-0.259957	0.254759	-0.3353	-0.238948	0.225483	-0.156678	0.0894773	0.0827724	0.189105	0.154358	-0.0174402	0.0633261	0.0278523	-0.228669	-0.1304	0.159765	-0.0149173	-0.138693	-0.0540828	0.0238407		-0.0100975	0.166344	0.0362992
-2.73777	0.0772849	-0.272859	0.242203	-0.335698	-0.217459	0.239893	-0.161742	0.0647696	0.0706453	0.164214	0.151179	-0.0224574	0.0793631	0.0321306	-0.227872	-0.134518	0.187039	-0.0124974	-0.149127	-0.0499452	0.0320927		-0.0115885	0.165863	0.0361943
-2.63946	0.0603481	-0.276814	0.224559	-0.334513	-0.197822	0.252554	-0.1625	0.0421262	0.0600093	0.138119	0.142219	-0.0276617	0.0935215	0.0365919	-0.224222	-0.134542	0.211955	-0.00461745	-0.159914	-0.0490214	0.0404038		-0.01282	0.164306	0.0358545
-2.54116	0.037458	-0.276154	0.200887	-0.33142	-0.179533	0.267339	-0.167555	0.010911	0.0500782	0.106435	0.138285	-0.0270298	0.104261	0.0393887	-0.219614	-0.131901	0.23445	0.0096869	-0.173166	-0.0477536	0.0506824		-0.0144888	0.162859	0.0355387
-2.44285	0.0198582	-0.273135	0.170854	-0.32892	-0.163682	0.277038	-0.169957	-0.0167443	0.0376386	0.0714188	0.13592	-0.0245036	0.115558	0.0438739	-0.209315	-0.1325	0.249173	0.0217109	-0.18716	-0.0424447	0.0617194		-0.0163618	0.161083	0.0351511
-2.34455	0.0129687	-0.270268	0.13553	-0.324587	-0.143184	0.288741	-0.16558	-0.0457281	0.024089	0.0393761	0.133402	-0.0189407	0.129232	0.0436011	-0.193334	-0.127798	0.262356	0.0331987	-0.198422	-0.0374396	0.0728676		-0.0166629	0.159329	0.0347685
-2.24625	0.00404231	-0.268716	0.0958476	-0.32149	-0.123681	0.29571	-0.162578	-0.0799048	0.01186	0.00142873	0.132569	-0.00741463	0.144632	0.0369178	-0.178608	-0.1192	0.271227	0.0448144	-0.209125	-0.0316437	0.0838268		-0.0180708	0.158409	0.0345678
-2.14794	-0.00358986	-0.261841	0.056428	-0.316525	-0.103208	0.296168	-0.157095	-0.110436	-0.00217241	-0.0353497	0.134996	0.00378753	0.15786	0.0346678	-0.15923	-0.113669	0.27298	0.056362	-0.220417	-0.0239686	0.091424		-0.0191823	0.157141	0.034291
-2.04964	-0.00849007	-0.249233	0.0185176	-0.306308	-0.0849946	0.29653	-0.153276	-0.133378	-0.00926536	-0.0730013	0.140982	0.00974461	0.166023	0.0295291	-0.131904	-0.109609	0.269447	0.0623161	-0.230289	-0.015462	0.0969684		-0.0197691	0.155377	0.033906
-1.95133	-0.0144888	-0.231381	-0.0220445	-0.290222	-0.0753855	0.297277	-0.149704	-0.160571	-0.0173765	-0.115162	0.139963	0.0109686	0.173521	0.0241316	-0.102411	-0.109639	0.264826	0.0660341	-0.24096	-0.00895423	0.10399		-0.0217899	0.154406	0.0336942
-1.85303	-0.0211059	-0.207539	-0.0651802	-0.270875	-0.0651334	0.297328	-0.135617	-0.185432	-0.0213854	-0.158543	0.140891	0.0102275	0.176504	0.0205134	-0.0753354	-0.109412	0.253222	0.0664677	-0.247575	-0.000776429	0.111347		-0.02321	0.153103	0.0334098
-1.75473	-0.0284574	-0.186647	-0.102615	-0.249227	-0.0586916	0.29152	-0.118825	-0.205327	-0.0191344	-0.192188	0.142703	0.0123961	0.178752	0.0149371	-0.0543749	-0.112117	0.225949	0.0664416	-0.253069	0.0120305	0.117272		-0.0246987	0.151047	0.0329611
-1.65642	-0.0363527	-0.167141	-0.145984	-0.223077	-0.0571634	0.279902	-0.0976815	-0.214496	-0.0244079	-0.225614	0.146177	0.0143351	0.179613	0.00523557	-0.0314511	-0.110605	0.19788	0.0673383	-0.255552	0.0258693	0.120724		-0.0263072	0.14893	0.0324993
-1.55812	-0.0410986	-0.143268	-0.184623	-0.194977	-0.0536115	0.262425	-0.0764954	-0.220483	-0.0295618	-0.261388	0.141354	0.0174454	0.183172	-0.000600908	-0.00732938	-0.103115	0.169956	0.0682277	-0.256096	0.0382473	0.124994		-0.0269917	0.147221	0.0321263
-1.45981	-0.0413073	-0.125011	-0.223479	-0.16502	-0.0523913	0.240464	-0.0485833	-0.223681	-0.0282806	-0.296546	0.133994	0.0218362	0.183643	-0.0070566	0.0181674	-0.0975498	0.134473	0.0648815	-0.255475	0.050839	0.130867		-0.0278675	0.146259	0.0319162
-1.36151	-0.0427288	-0.105032	-0.262927	-0.133007	-0.0506709	0.219817	-0.0266352	-0.226747	-0.0235068	-0.329218	0.126603	0.0283949	0.185623	-0.0112753	0.0371256	-0.0905017	0.0900334	0.0614388	-0.24903	0.0610409	0.136437		-0.0287984	0.146618	0.0319947
-1.26321	-0.0443803	-0.0874963	-0.297809	-0.0976014	-0.0415618	0.195604	-0.0016874	-0.227564	-0.00876085	-0.349189	0.124228	0.036653	0.189363	-0.0113194	0.0486305	-0.0825924	0.0428411	0.0586936	-0.240761	0.0707007	0.140985		-0.0277631	0.147279	0.0321389
-1.1649	-0.0473015	-0.0687593	-0.32937	-0.0633344	-0.0346191	0.17489	0.0238572	-0.232179	0.00816063	-0.37166	0.11932	0.0417698	0.194542	-0.0105892	0.0556269	-0.0707215	-0.00615572	0.0565529	-0.227187	0.0787038	0.144204		-0.026869	0.150021	0.0327373
-1.0666	-0.0489964	-0.0524285	-0.349775	-0.0199371	-0.0246073	0.152264	0.0483297	-0.236305	0.0282078	-0.391969	0.109522	0.0520608	0.199551	-0.0108949	0.0622235	-0.0590081	-0.0571985	0.0578724	-0.209407	0.0876062	0.144432		-0.0246885	0.153141	0.0334181
-0.968294	-0.0504145	-0.0311277	-0.362974	0.024349	-0.00663967	0.13303	0.0713188	-0.235205	0.0523675	-0.413	0.0923669	0.0616285	0.206848	-0.00993713	0.0611473	-0.0460497	-0.107085	0.0581647	-0.193764	0.100907	0.141071		-0.0215713	0.157525	0.0343747
-0.86999	-0.0462825	-0.00440576	-0.366706	0.0664309	0.00946027	0.121866	0.0961416	-0.235069	0.07689	-0.437826	0.0708572	0.07163	0.211223	-0.010404	0.0584058	-0.0325087	-0.156715	0.0560591	-0.176895	0.116617	0.136653		-0.0178371	0.163594	0.0356991
-0.771686	-0.0394234	0.0158951	-0.361771	0.112845	0.0195317	0.109063	0.124069	-0.232972	0.101145	-0.455904	0.0466257	0.0816211	0.210975	-0.0170107	0.0517214	-0.015106	-0.202499	0.0496782	-0.158225	0.129871	0.12949		-0.0143038	0.169007	0.0368803
-0.673382	-0.0357601	0.0240823	-0.353696	0.159712	0.0306546	0.0993669	0.148724	-0.228258	0.123778	-0.472374	0.0229034	0.0889563	0.208544	-0.0267423	0.0395218	0.00638256	-0.249568	0.0404048	-0.141403	0.140408	0.120031		-0.012111	0.175277	0.0382485
-0.575078	-0.0318525	0.0270844	-0.33904	0.202091	0.038718	0.0927271	0.174316	-0.225288	0.140803	-0.483372	0.00374064	0.0991543	0.209208	-0.038743	0.0264796	0.0282961	-0.293232	0.0321565	-0.124746	0.151292	0.109665		-0.00954959	0.181849	0.0396826
-0.476774	-0.0221073	0.0264572	-0.318131	0.245234	0.0459347	0.085307	0.201434	-0.2189	0.156797	-0.485821	-0.0178119	0.108737	0.210846	-0.047905	0.011265	0.0470269	-0.331922	0.0152274	-0.104468	0.16004	0.0960359		-0.00651063	0.187403	0.0408947
-0.37847	-0.0113213	0.0217717	-0.293969	0.285085	0.0511745	0.0837893	0.229391	-0.217782	0.172028	-0.484648	-0.04088	0.118609	0.209012	-0.0536933	-0.0132565	0.0708689	-0.360667	-0.00533232	-0.0857009	0.165806	0.0817474		-0.00371272	0.192886	0.0420912
-0.280166	-0.0116663	0.0216675	-0.264627	0.319355	0.0537588	0.0820654	0.253881	-0.211951	0.178368	-0.487984	-0.068182	0.127104	0.203129	-0.0528329	-0.0378124	0.0910619	-0.386362	-0.0248158	-0.0660795	0.17276	0.0645553		-0.00212417	0.198125	0.0432344
-0.181862	-0.00675064	0.0249	-0.229446	0.360671	0.0576977	0.0882439	0.280241	-0.201207	0.184407	-0.489904	-0.093546	0.130885	0.197462	-0.0530857	-0.0586286	0.10518	-0.404642	-0.0434159	-0.0439886	0.177308	0.0486982		0.00147994	0.203663	0.0444429
-0.0835584	0.00277601	0.0254719	-0.192944	0.394005	0.0576336	0.0997878	0.303704	-0.191021	0.19495	-0.491545	-0.120915	0.135907	0.188269	-0.0595221	-0.0844881	0.122453	-0.419962	-0.0611935	-0.0228904	0.181563	0.0354068		0.00464022	0.20969	0.0457581
0.0147456	0.0127414	0.0221817	-0.159212	0.416335	0.0545417	0.109203	0.323668	-0.180578	0.199027	-0.488909	-0.142813	0.14564	0.180766	-0.0616292	-0.111984	0.142501	-0.434496	-0.0769993	-0.00161582	0.185482	0.0220524		0.00742397	0.214879	0.0468904
0.11305	0.0223542	0.0148169	-0.124221	0.433327	0.0510613	0.119155	0.337889	-0.164805	0.211534	-0.482118	-0.155307	0.158749	0.172472	-0.061418	-0.133119	0.162426	-0.451623	-0.0869399	0.0218667	0.193271	0.0106145		0.0119041	0.219597	0.0479199
0.211354	0.0373716	0.00135539	-0.0891121	0.450995	0.0499422	0.12704	0.344546	-0.153157	0.221525	-0.475639	-0.170073	0.172192	0.168223	-0.058019	-0.1516	0.18151	-0.463678	-0.0971939	0.0433941	0.198026	0.0029997		0.0162213	0.224143	0.0489119
0.309658	0.057598	-0.00998391	-0.0583182	0.467865	0.044959	0.139702	0.348801	-0.147377	0.226242	-0.475006	-0.184059	0.183124	0.165124	-0.0520936	-0.164816	0.201339	-0.467393	-0.109747	0.0654422	0.198749	-0.00507484		0.0202416	0.228687	0.0499036
0.407962	0.0817197	-0.0233784	-0.0183821	0.485106	0.0428072	0.162928	0.348403	-0.147222	0.236882	-0.473307	-0.204486	0.193082	0.161628	-0.0448891	-0.180017	0.217067	-0.46764	-0.126654	0.0834143	0.19802	-0.0133254		0.0243693	0.233995	0.0510618
0.506266	0.105107	-0.0367862	0.0150052	0.502383	0.0439834	0.193036	0.349262	-0.147463	0.246552	-0.468502	-0.223086	0.199792	0.153364	-0.0449349	-0.199085	0.226841	-0.463622	-0.146754	0.0976851	0.196718	-0.0220323		0.0274982	0.239431	0.0522481
0.60457	0.122584	-0.0442838	0.0475546	0.519435	0.0487768	0.22646	0.344837	-0.148495	0.246177	-0.462401	-0.241202	0.204182	0.145491	-0.0455583	-0.216932	0.234256	-0.452089	-0.161657	0.112623	0.193856	-0.0333163		0.0304903	0.243538	0.0531443
0.702874	0.139609	-0.0512132	0.0836898	0.535117	0.0460006	0.257477	0.339719	-0.147322	0.242619	-0.457023	-0.257286	0.203932	0.132694	-0.0407795	-0.229024	0.24262	-0.432762	-0.175777	0.119629	0.191025	-0.0443033		0.0332686	0.246383	0.0537652
0.801178	0.157177	-0.0570169	0.11847	0.551103	0.0371213	0.295167	0.330237	-0.148793	0.231408	-0.460043	-0.275258	0.203376	0.118718	-0.0349287	-0.234048	0.254478	-0.412692	-0.18945	0.123157	0.186591	-0.0523272		0.0353546	0.250262	0.0546116
0.899482	0.175449	-0.0635223	0.150329	0.567454	0.0305905	0.336172	0.31989	-0.147458	0.223496	-0.458689	-0.293208	0.202843	0.10174	-0.0267709	-0.234257	0.265557	-0.390439	-0.201982	0.123993	0.182636	-0.0595768		0.0382975	0.254117	0.0554529
0.997786	0.19616	-0.0690722	0.177337	0.57624	0.0246036	0.373686	0.30936	-0.13957	0.217045	-0.458075	-0.305882	0.199988	0.0833189	-0.0180867	-0.23542	0.275288	-0.365096	-0.213842	0.121765	0.176365	-0.062814		0.0411095	0.256772	0.0560322
1.09609	0.215538	-0.0817287	0.197253	0.578484	0.00936791	0.406283	0.30326	-0.129399	0.209069	-0.453042	-0.311523	0.198198	0.063439	-0.0107644	-0.226048	0.285533	-0.339898	-0.229979	0.120082	0.163427	-0.0648537		0.0429857	0.257974	0.0562944
1.19439	0.229648	-0.10509	0.21064	0.57508	-0.00191824	0.434413	0.292827	-0.114856	0.20153	-0.444883	-0.315894	0.194322	0.0431127	-0.00124138	-0.213181	0.29289	-0.312861	-0.244095	0.116397	0.149209	-0.0670671		0.043761	0.257577	0.0562078
1.2927	0.239657	-0.125246	0.21599	0.561371	-0.00693573	0.465335	0.275034	-0.0918577	0.197022	-0.438704	-0.318008	0.1902	0.0263325	0.0143604	-0.196844	0.295164	-0.288193	-0.253197	0.11302	0.137206	-0.063565		0.0451495	0.255504	0.0557555
1.391	0.256382	-0.138115	0.21727	0.540108	-0.0114639	0.495926	0.259637	-0.0714884	0.197129	-0.431205	-0.31788	0.187048	0.00985434	0.0359422	-0.175914	0.291665	-0.2658	-0.263815	0.113825	0.123959	-0.0570795		0.0474279	0.253091	0.0552289
1.48931	0.268201	-0.150673	0.217584	0.51824	-0.0106807	0.52201	0.240589	-0.0530546	0.201885	-0.425427	-0.321619	0.182112	-0.00920763	0.0589775	-0.153237	0.283251	-0.249065	-0.275393	0.113788	0.111468	-0.0509754		0.0485131	0.251273	0.0548323
1.58761	0.272479	-0.164714	0.214634	0.492907	-0.00652015	0.546871	0.224899	-0.0315794	0.202805	-0.4209	-0.324784	0.172105	-0.0303996	0.079019	-0.124013	0.275128	-0.236744	-0.28487	0.112171	0.0995058	-0.0428052		0.0488188	0.249207	0.0543814
1.68591	0.273939	-0.179959	0.212736	0.471541	-1.67398e-05	0.563156	0.20896	-0.00968305	0.204985	-0.416367	-0.322918	0.159138	-0.0484441	0.0952021	-0.0850404	0.258189	-0.225551	-0.287081	0.11162	0.0870145	-0.0346426		0.0493704	0.245876	0.0536546
1.78422	0.285328	-0.202302	0.207392	0.455469	0.0108517	0.574851	0.190452	0.0147449	0.217098	-0.406424	-0.313067	0.148159	-0.0625688	0.106491	-0.0464492	0.241414	-0.217608	-0.287749	0.109641	0.0721221	-0.0236363		0.051153	0.243077	0.0530438
1.88252	0.296554	-0.227818	0.195258	0.431758	0.0249503	0.5804	0.167761	0.0389634	0.230748	-0.397148	-0.304744	0.139836	-0.0750035	0.125047	-0.0117808	0.226689	-0.212955	-0.290508	0.106003	0.0579259	-0.013828		0.0518147	0.240621	0.0525078
1.98083	0.300286	-0.247036	0.182064	0.41174	0.0416224	0.580692	0.145737	0.0609032	0.238083	-0.388103	-0.296956	0.131295	-0.0841145	0.145048	0.0279626	0.209928	-0.205284	-0.295599	0.104233	0.0433516	-0.00283019		0.0525249	0.237827	0.051898
2.07913	0.29619	-0.25994	0.169992	0.398861	0.0614726	0.584987	0.124534	0.0756849	0.248515	-0.376867	-0.293096	0.120187	-0.0916072	0.161048	0.063334	0.194786	-0.195443	-0.307977	0.102091	0.0280749	0.0104488		0.0531083	0.23665	0.0516413
2.17743	0.296457	-0.275619	0.161492	0.382879	0.0863378	0.585733	0.109394	0.0873227	0.253561	-0.366678	-0.296171	0.10686	-0.0985576	0.177098	0.0941868	0.179361	-0.178741	-0.329209	0.0969704	0.0115306	0.0219109		0.0526723	0.236919	0.0516999
2.27574	0.29768	-0.285303	0.154008	0.363917	0.11308	0.587766	0.0945074	0.100946	0.258283	-0.356588	-0.296694	0.0943993	-0.103754	0.192348	0.124628	0.166568	-0.158463	-0.348306	0.0916156	-0.00551804	0.0323715		0.0532139	0.237228	0.0517674
2.37404	0.296677	-0.292159	0.14338	0.345464	0.151084	0.589523	0.0830724	0.119879	0.263942	-0.346369	-0.298838	0.0841096	-0.108437	0.205154	0.158996	0.157292	-0.136822	-0.362562	0.083739	-0.0211656	0.0435345		0.055214	0.238078	0.0519528
2.47235	0.290206	-0.294502	0.126545	0.327566	0.188502	0.586925	0.0786026	0.14048	0.2689	-0.335179	-0.294769	0.076344	-0.110415	0.217594	0.19709	0.153023	-0.119305	-0.368655	0.0768912	-0.0347611	0.057499		0.0585039	0.237852	0.0519037
2.57065	0.282875	-0.298278	0.113526	0.309652	0.222617	0.581589	0.0728058	0.161781	0.277354	-0.325762	-0.287808	0.0723395	-0.107989	0.233785	0.234593	0.150783	-0.100973	-0.371766	0.0738038	-0.0486481	0.0726495		0.0628062	0.238137	0.0519658
2.66895	0.28289	-0.305219	0.100019	0.292221	0.250887	0.574044	0.0699129	0.183732	0.287303	-0.318808	-0.276516	0.0696973	-0.102981	0.25523	0.273158	0.155652	-0.0844819	-0.377195	0.0712284	-0.061271	0.090214		0.0680818	0.239924	0.0523557
2.76726	0.282444	-0.309987	0.0838692	0.273835	0.284005	0.569461	0.0740709	0.207045	0.293938	-0.312665	-0.265116	0.0735983	-0.0951369	0.268792	0.311651	0.157462	-0.0708566	-0.380939	0.0720711	-0.073882	0.103261		0.073663	0.242189	0.05285
2.86556	0.282321	-0.316563	0.06561	0.252081	0.317778	0.558469	0.0895014	0.231486	0.30159	-0.308967	-0.248732	0.0755576	-0.0856549	0.277147	0.347509	0.156118	-0.0536037	-0.387654	0.0745847	-0.083971	0.114534		0.0790067	0.244297	0.0533101
2.96387	0.280083	-0.32193	0.0503635	0.232034	0.351515	0.541469	0.106671	0.257559	0.300434	-0.30987	-0.22828	0.0781449	-0.071917	0.28058	0.381913	0.15441	-0.0350779	-0.39174	0.0769327	-0.092758	0.126196		0.0841302	0.24568	0.0536117
3.06217	0.274978	-0.326129	0.0346513	0.212452	0.379868	0.527319	0.127403	0.274635	0.289713	-0.310576	-0.209665	0.0783282	-0.0551758	0.284035	0.418336	0.158284	-0.0194506	-0.40362	0.081164	-0.101259	0.134181		0.0880701	0.248025	0.0541235
3.16047	0.270664	-0.325675	0.0244416	0.194899	0.41112	0.512965	0.147113	0.285832	0.279083	-0.316248	-0.193919	0.0780975	-0.0377883	0.284844	0.446252	0.161327	-0.00938846	-0.407871	0.0840858	-0.105177	0.144383		0.0918591	0.249854	0.0545225
3.25878	0.26934	-0.311584	0.0151166	0.18678	0.436724	0.493546	0.170466	0.297409	0.2691	-0.329641	-0.174917	0.0791149	-0.0177978	0.282045	0.466632	0.167503	0.000409714	-0.410878	0.0855163	-0.107507	0.152424		0.096181	0.250412	0.0546444
3.35708	0.271696	-0.29546	0.00524162	0.186221	0.461216	0.465715	0.19984	0.30191	0.258956	-0.342294	-0.156073	0.0782227	0.00199272	0.277399	0.485095	0.178183	0.0138371	-0.419218	0.0854549	-0.109166	0.156552		0.100253	0.251077	0.0547896
3.45539	0.269331	-0.276867	-0.000251955	0.190274	0.481018	0.433103	0.229727	0.301773	0.247476	-0.355811	-0.13789	0.0759619	0.0269236	0.271095	0.497534	0.193893	0.0342677	-0.425162	0.0821178	-0.108423	0.158458		0.104217	0.250489	0.0546612
3.55369	0.277233	-0.252032	-0.00826577	0.193689	0.501765	0.402433	0.260697	0.303027	0.232753	-0.371077	-0.113942	0.0707534	0.0550652	0.263387	0.505607	0.214078	0.0544569	-0.430942	0.0805474	-0.105653	0.163302		0.109375	0.250426	0.0546474
3.65199	0.290598	-0.225861	-0.0152431	0.199836	0.521389	0.374025	0.289469	0.2965	0.224602	-0.39258	-0.0865229	0.0674906	0.083824	0.255836	0.507091	0.240542	0.0742403	-0.431892	0.078252	-0.100726	0.165871		0.115083	0.250795	0.0547279
3.7503	0.300435	-0.195343	-0.0267793	0.202496	0.548439	0.356124	0.313855	0.287701	0.222935	-0.416276	-0.0644374	0.0671583	0.113779	0.249702	0.50298	0.274975	0.0933922	-0.430051	0.0748987	-0.0940374	0.16885		0.121467	0.252734	0.0551511
3.8486	0.297658	-0.157506	-0.038015	0.198349	0.573047	0.341789	0.342201	0.269689	0.21914	-0.441691	-0.0464445	0.0625501	0.140192	0.246159	0.498146	0.311381	0.114928	-0.426662	0.0694508	-0.0848049	0.172228		0.126752	0.254793	0.0556005
3.94691	0.294076	-0.113878	-0.0476493	0.191893	0.594536	0.328743	0.376151	0.252167	0.212968	-0.46344	-0.0277886	0.0552396	0.161948	0.234637	0.494551	0.350474	0.13272	-0.423352	0.061946	-0.0748966	0.174324		0.131684	0.257306	0.0561488
4.04521	0.29134	-0.0775616	-0.0568664	0.184169	0.616729	0.320726	0.408388	0.237592	0.208379	-0.486778	-0.0115531	0.0502638	0.185019	0.225171	0.485483	0.393198	0.145578	-0.415696	0.0526666	-0.0644662	0.172707		0.136404	0.261205	0.0569996
4.14351	0.290097	-0.0529669	-0.0696857	0.173133	0.632695	0.305763	0.444462	0.227795	0.204721	-0.513394	0.00260977	0.0473301	0.205524	0.215791	0.481067	0.430862	0.158192	-0.395899	0.042869	-0.0534864	0.17022		0.140367	0.265501	0.057937
4.24182	0.287063	-0.0210109	-0.0904309	0.168646	0.647013	0.296327	0.479705	0.217465	0.202706	-0.540975	0.0223869	0.0459457	0.225483	0.200309	0.473589	0.474249	0.16221	-0.369863	0.0344704	-0.0425279	0.168125		0.144804	0.270262	0.058976
4.34012	0.274112	0.00860058	-0.108901	0.164969	0.659461	0.285995	0.515408	0.204419	0.199685	-0.563347	0.0439452	0.042072	0.24269	0.181539	0.463976	0.515074	0.157627	-0.346639	0.0267836	-0.0281832	0.165755		0.147859	0.274872	0.059982
4.43843	0.261827	0.0356928	-0.119805	0.161625	0.662577	0.272567	0.548166	0.188764	0.197593	-0.582061	0.0668991	0.0364975	0.257504	0.162793	0.446366	0.555199	0.149762	-0.324177	0.0194651	-0.0138467	0.161892		0.149776	0.278335	0.0607376
4.53673	0.248609	0.0623209	-0.129406	0.154193	0.658282	0.259076	0.575252	0.169202	0.192417	-0.602706	0.088492	0.0297808	0.267652	0.141681	0.423921	0.590721	0.148381	-0.306434	0.011622	-0.00103013	0.154607		0.149363	0.28175	0.0614828
4.63503	0.233366	0.0867909	-0.135031	0.145733	0.652045	0.247638	0.603296	0.146964	0.186179	-0.621899	0.111548	0.0217704	0.272637	0.118075	0.403287	0.630054	0.143802	-0.289908	0.000940634	0.0123666	0.145866		0.148358	0.286163	0.062446
4.73334	0.214364	0.114192	-0.139213	0.135093	0.652079	0.239396	0.629005	0.120327	0.188106	-0.636009	0.132054	0.0143156	0.275381	0.0920212	0.378769	0.664715	0.142303	-0.2731	-0.0116626	0.0249555	0.138106		0.14739	0.29072	0.0634402
4.83164	0.198318	0.134608	-0.14128	0.121109	0.654676	0.229572	0.649947	0.0929467	0.19691	-0.643462	0.151358	0.000638471	0.27777	0.0718571	0.352141	0.700184	0.141114	-0.259736	-0.0245231	0.0378648	0.137545		0.146646	0.295481	0.0644792
4.92995	0.181694	0.152823	-0.140982	0.107585	0.657563	0.21865	0.658307	0.0692282	0.207104	-0.637239	0.169317	-0.0106953	0.277413	0.0536889	0.323285	0.731109	0.130228	-0.239696	-0.036181	0.0494524	0.136669		0.145682	0.297126	0.0648381
5.02825	0.162968	0.168207	-0.141929	0.0880657	0.657383	0.198819	0.661806	0.0439458	0.221925	-0.63133	0.186576	-0.0222448	0.270975	0.0394278	0.29067	0.758903	0.115894	-0.218866	-0.0467367	0.0602557	0.133487		0.142771	0.298392	0.0651146
5.12655	0.14368	0.180214	-0.139497	0.073629	0.658405	0.181228	0.666354	0.0219205	0.248085	-0.623996	0.20654	-0.0315985	0.260503	0.0249585	0.259118	0.781954	0.103675	-0.193228	-0.0596002	0.0716602	0.130264		0.141156	0.299668	0.065393
5.22486	0.123887	0.188685	-0.138266	0.0659654	0.659663	0.165119	0.672073	-4.38808e-05	0.276074	-0.614013	0.226534	-0.0391514	0.248217	0.0141944	0.229417	0.804401	0.0982198	-0.172032	-0.0699019	0.0785081	0.125233		0.140133	0.30156	0.0658057
5.32316	0.103671	0.186069	-0.133819	0.0566952	0.666711	0.157691	0.678509	-0.0255524	0.302122	-0.595419	0.244817	-0.0467885	0.232659	0.00959992	0.206313	0.822631	0.0944695	-0.153081	-0.0774527	0.0830317	0.122281		0.139769	0.303023	0.066125
5.42147	0.0798883	0.181886	-0.124416	0.0439739	0.675464	0.161388	0.688836	-0.0494495	0.324872	-0.577212	0.261048	-0.0519085	0.214731	0.00341566	0.18563	0.835633	0.0859292	-0.132112	-0.0854733	0.0861613	0.120308		0.139457	0.304737	0.0664991
5.51977	0.0566631	0.174118	-0.112193	0.0336387	0.687108	0.168988	0.695923	-0.0690726	0.344138	-0.554754	0.277537	-0.056476	0.188998	-0.0029938	0.170507	0.840517	0.0716146	-0.112914	-0.0930428	0.0907398	0.120107		0.139007	0.305356	0.0666341
5.61807	0.0240992	0.15938	-0.0954439	0.0286299	0.693338	0.175099	0.704953	-0.0897591	0.363047	-0.530643	0.289346	-0.0577324	0.159718	-0.00300647	0.15784	0.843306	0.0626085	-0.0913243	-0.10119	0.0933333	0.117804		0.138257	0.30535	0.0666329
5.71638	-0.00833945	0.147635	-0.0777214	0.0253861	0.6934	0.181189	0.712846	-0.101676	0.37805	-0.498596	0.296773	-0.0575008	0.134046	-0.000870664	0.149024	0.83968	0.0570648	-0.0675867	-0.108472	0.0950013	0.117704		0.13843	0.303068	0.0661349
5.81468	-0.0344198	0.134754	-0.0519671	0.0243572	0.685727	0.180562	0.723629	-0.106985	0.381825	-0.463868	0.30405	-0.0592911	0.103855	-0.00133574	0.141589	0.829618	0.0478925	-0.053705	-0.113233	0.0959438	0.118134		0.137482	0.299269	0.0653059
5.91299	-0.0510981	0.114942	-0.0199484	0.0278698	0.673818	0.180109	0.736985	-0.103866	0.379697	-0.43234	0.31413	-0.0548156	0.0737703	-1.48877e-05	0.134024	0.817485	0.0388235	-0.0404769	-0.11728	0.0958465	0.119121		0.137466	0.294821	0.0643351
6.01129	-0.070046	0.0871587	0.0186402	0.0378186	0.660729	0.177909	0.749548	-0.0989611	0.376184	-0.404404	0.322165	-0.0492949	0.0497223	0.00667529	0.126498	0.799371	0.0356172	-0.0281106	-0.120645	0.0960363	0.12103		0.137792	0.289882	0.0632574
6.10959	-0.0845265	0.060149	0.0628992	0.0480456	0.647107	0.173731	0.764654	-0.0936701	0.376001	-0.374399	0.332011	-0.0468158	0.0272309	0.0116985	0.121977	0.772632	0.034272	-0.0200561	-0.1233	0.0933959	0.127086		0.138577	0.284897	0.0621697
6.2079	-0.0888723	0.0440212	0.115269	0.0619274	0.641893	0.178706	0.777184	-0.089976	0.372528	-0.343262	0.344803	-0.0443932	0.00651129	0.01532	0.112334	0.747134	0.0272743	-0.0184216	-0.12482	0.0902512	0.132445		0.14085	0.280929	0.0613036
6.3062	-0.0961475	0.0231485	0.173109	0.0738642	0.634979	0.183398	0.789811	-0.0813209	0.366034	-0.308932	0.35144	-0.0428226	-0.0117311	0.0255232	0.105606	0.714423	0.0265709	-0.0151997	-0.125635	0.0860136	0.135162		0.143205	0.276137	0.0602581
6.40451	-0.0949376	-0.000295425	0.228776	0.081275	0.623669	0.19138	0.804603	-0.0685337	0.362791	-0.283593	0.352477	-0.0348004	-0.0284554	0.0349255	0.0990746	0.681718	0.0333174	-0.00918169	-0.128089	0.0781932	0.136625		0.145759	0.272198	0.0593985
6.50281	-0.0918069	-0.021111	0.283937	0.0878336	0.613403	0.202597	0.821464	-0.0546659	0.356344	-0.264101	0.35457	-0.0210358	-0.0417376	0.0480156	0.0923543	0.647827	0.0409269	-0.0023164	-0.128675	0.0702771	0.139512		0.14922	0.269259	0.058757
6.60111	-0.0864096	-0.0455858	0.340344	0.094764	0.614839	0.21386	0.838504	-0.036407	0.351668	-0.244207	0.357181	-0.00874519	-0.0511539	0.0648129	0.089172	0.615113	0.0459927	0.00447152	-0.12859	0.0630203	0.144268		0.154139	0.268253	0.0585376
6.69942	-0.0797866	-0.0700338	0.391659	0.103337	0.613262	0.221126	0.853239	-0.0158783	0.343336	-0.228106	0.356223	0.00255874	-0.056891	0.0827615	0.0865806	0.576315	0.053072	0.0101411	-0.1266	0.0545884	0.149358		0.158108	0.266763	0.0582125
6.79772	-0.0734379	-0.093299	0.44291	0.11468	0.605134	0.222347	0.869005	0.00635529	0.326433	-0.217042	0.35672	0.0109569	-0.0645645	0.098028	0.0818658	0.537095	0.0526579	0.0129009	-0.124619	0.0464361	0.151828		0.160114	0.266329	0.0581177
6.89603	-0.0672218	-0.111075	0.494733	0.130218	0.593521	0.22503	0.88296	0.0243183	0.305554	-0.209179	0.363531	0.0241221	-0.0706084	0.112471	0.077087	0.50018	0.050574	0.0182301	-0.122158	0.038391	0.151849		0.162501	0.266646	0.058187
6.99433	-0.0596416	-0.12381	0.54582	0.144245	0.579425	0.231811	0.902115	0.034753	0.284379	-0.21272	0.370753	0.0368074	-0.0710304	0.127995	0.0720605	0.467347	0.0569826	0.0176269	-0.119698	0.0297326	0.152728		0.165128	0.269174	0.0587387
7.09263	-0.0450337	-0.133717	0.598986	0.162609	0.566384	0.256776	0.926025	0.0401322	0.261956	-0.211301	0.37527	0.0495592	-0.0671535	0.144601	0.0691974	0.4336	0.0643759	0.0110608	-0.117179	0.0227549	0.1554		0.169729	0.272856	0.0595421
7.19094	-0.0254776	-0.138909	0.649936	0.172948	0.555059	0.276935	0.942654	0.0501393	0.231371	-0.209646	0.371905	0.0615826	-0.0624251	0.163512	0.0645589	0.400231	0.0672543	0.00518802	-0.111284	0.0167297	0.160038		0.173443	0.275494	0.0601177
7.28924	-0.00643973	-0.137549	0.696737	0.170149	0.542074	0.298086	0.954779	0.0620868	0.196011	-0.209654	0.367505	0.0686723	-0.054187	0.18035	0.0622704	0.366489	0.0660549	0.000738871	-0.105555	0.0163669	0.165369		0.176207	0.27761	0.0605794
7.38755	0.011942	-0.128713	0.742784	0.161324	0.524837	0.312914	0.963647	0.0746723	0.16379	-0.207955	0.362197	0.0768104	-0.0420139	0.189661	0.0547519	0.336788	0.0598403	-0.00532497	-0.100901	0.0179773	0.169789		0.178039	0.279509	0.0609939
7.48585	0.0341087	-0.116615	0.785146	0.154262	0.501824	0.319727	0.962605	0.0768591	0.129552	-0.203827	0.3598	0.0882444	-0.0260382	0.201089	0.043289	0.316352	0.0532331	-0.0133423	-0.095389	0.0204432	0.1737		0.179287	0.280128	0.0611289
7.58415	0.054335	-0.101154	0.818988	0.143336	0.476995	0.321194	0.969538	0.0754623	0.0968873	-0.200354	0.353046	0.100278	-0.00513727	0.212106	0.0293424	0.303381	0.0480076	-0.016736	-0.0898816	0.0215296	0.176813		0.18038	0.281333	0.0613919
7.68246	0.0820182	-0.0866111	0.84552	0.126739	0.458243	0.322958	0.971357	0.0775561	0.0690029	-0.195695	0.346041	0.110463	0.0175395	0.213754	0.016136	0.289748	0.0397265	-0.022082	-0.0843097	0.0233295	0.17923		0.180984	0.28185	0.0615048
7.78076	0.108438	-0.073473	0.868399	0.105384	0.445403	0.326495	0.974852	0.0722168	0.0432858	-0.195339	0.339112	0.118677	0.0386005	0.214674	-0.000500676	0.279507	0.0290088	-0.0338493	-0.0810576	0.0228561	0.181905		0.180219	0.28434	0.0620482
7.87907	0.135066	-0.0621355	0.88353	0.086059	0.428341	0.331481	0.979624	0.0625782	0.023607	-0.199073	0.332323	0.128235	0.0631483	0.218541	-0.0173153	0.272686	0.0201077	-0.0395892	-0.0793127	0.0236046	0.182265		0.179703	0.286558	0.0625321
7.97737	0.166644	-0.0470403	0.893868	0.0687759	0.416401	0.335393	0.97933	0.0438263	0.0116544	-0.197514	0.323307	0.131601	0.0876149	0.218019	-0.0333688	0.267806	0.0111037	-0.0484643	-0.0751239	0.0232586	0.182118		0.17901	0.287727	0.0627871
8.07567	0.200335	-0.0248558	0.897636	0.0527128	0.407501	0.343535	0.97829	0.0195115	0.00298286	-0.193986	0.316576	0.133095	0.107689	0.214405	-0.0454261	0.268298	0.000903876	-0.0525507	-0.0685751	0.0207429	0.182768		0.179123	0.288303	0.0629128
8.17398	0.229253	-0.00109831	0.896577	0.0446599	0.395113	0.351326	0.975641	-0.00804304	-0.00364054	-0.187256	0.311504	0.135464	0.122974	0.21139	-0.0575974	0.275324	-0.00856812	-0.0513261	-0.060764	0.0215365	0.180015		0.179642	0.28792	0.0628292
8.27228	0.249286	0.0163709	0.890002	0.0382965	0.376688	0.350661	0.977143	-0.0342852	-0.00846233	-0.182085	0.305088	0.136732	0.136036	0.213614	-0.0660112	0.284301	-0.0124095	-0.0486367	-0.0546617	0.0245947	0.176813		0.17948	0.287191	0.0626701
8.37059	0.271853	0.0319568	0.884675	0.0328516	0.359247	0.346268	0.980672	-0.0648666	-0.00964517	-0.175985	0.301666	0.1386	0.14583	0.214124	-0.0715816	0.299046	-0.0180893	-0.0510062	-0.0477866	0.028003	0.176397		0.17963	0.287517	0.0627414
8.46889	0.2961	0.0512523	0.88043	0.0342592	0.345045	0.340465	0.980692	-0.102843	-0.0109534	-0.158437	0.304574	0.135134	0.153321	0.219106	-0.0736318	0.312607	-0.0279049	-0.0519735	-0.0403146	0.0330384	0.178616		0.180885	0.287505	0.0627387
8.56719	0.312943	0.069116	0.873988	0.0367819	0.337038	0.334091	0.978045	-0.142069	-0.00918592	-0.13364	0.307518	0.124203	0.15564	0.218197	-0.0698545	0.325274	-0.0354081	-0.0577033	-0.0323406	0.0375949	0.180015		0.18144	0.286893	0.0626051
8.6655	0.333124	0.0922025	0.867408	0.0424061	0.323688	0.327515	0.978341	-0.178501	-0.00475614	-0.10622	0.310058	0.114944	0.155242	0.215173	-0.0689625	0.341391	-0.0479566	-0.0622282	-0.0239999	0.0416453	0.181294		0.182467	0.286959	0.0626195
8.7638	0.357267	0.120732	0.859767	0.0511159	0.316985	0.320573	0.982832	-0.216584	0.00176951	-0.0702012	0.314845	0.106931	0.154267	0.210619	-0.0682525	0.360895	-0.062134	-0.0641758	-0.017592	0.0470104	0.183889		0.185265	0.288033	0.062854
8.86211	0.381159	0.14853	0.849043	0.0592642	0.31679	0.31952	0.988304	-0.250912	0.0156929	-0.0257216	0.315485	0.102586	0.155332	0.207711	-0.0621895	0.382086	-0.0668439	-0.0628824	-0.00959617	0.0538003	0.187878		0.190716	0.28825	0.0629014
8.96041	0.40184	0.174656	0.830378	0.0715555	0.319915	0.319689	0.998185	-0.27887	0.0354994	0.0183082	0.307301	0.0927036	0.153941	0.200439	-0.0541417	0.399261	-0.0659898	-0.063754	-0.00295597	0.0617375	0.189559		0.195679	0.287868	0.062818
9.05871	0.423519	0.199586	0.811489	0.0903965	0.321568	0.321196	1.00954	-0.301252	0.0553842	0.0662653	0.291179	0.0804025	0.144264	0.18691	-0.0424475	0.412638	-0.0679917	-0.0632129	0.00317201	0.0709651	0.192368		0.200283	0.287618	0.0627635
9.15702	0.445227	0.22473	0.784993	0.110697	0.319845	0.311001	1.02217	-0.31333	0.0765999	0.113834	0.275647	0.0685065	0.136505	0.170892	-0.0282206	0.430144	-0.067646	-0.0594849	0.00716635	0.0778088	0.197524		0.204981	0.286461	0.062511
9.25532	0.463073	0.244518	0.75377	0.139854	0.318429	0.299719	1.03931	-0.330551	0.101107	0.16029	0.267227	0.0597947	0.129585	0.147103	-0.0137044	0.449638	-0.0598322	-0.0544668	0.00857651	0.0825131	0.202456		0.209924	0.286463	0.0625114
9.35363	0.479893	0.256172	0.725414	0.181921	0.323483	0.285761	1.05722	-0.346243	0.129877	0.209412	0.261012	0.055628	0.119425	0.122518	1.12422e-05	0.467115	-0.0491613	-0.0489322	0.0112574	0.0847046	0.205587		0.215813	0.287423	0.0627208
9.45193	0.498792	0.26508	0.689238	0.228316	0.329597	0.277158	1.07666	-0.363015	0.156161	0.250899	0.255875	0.0496652	0.105552	0.0999153	0.0133162	0.477841	-0.0326845	-0.0373059	0.0138106	0.0872119	0.210266		0.22154	0.288787	0.0630184
9.55023	0.515242	0.270163	0.654198	0.276457	0.334725	0.276146	1.10389	-0.366736	0.192982	0.289191	0.254696	0.0377253	0.0894605	0.0737479	0.0321323	0.481337	-0.00789976	-0.0202324	0.0176298	0.0904229	0.213161		0.228973	0.290398	0.0633701
9.64854	0.533638	0.268214	0.620749	0.326036	0.339424	0.285317	1.12396	-0.361361	0.231177	0.32223	0.261496	0.0221741	0.0686277	0.0491773	0.0525196	0.479633	0.0157412	-0.00628475	0.021021	0.0944152	0.216056		0.236379	0.291781	0.0636717
9.74684	0.549174	0.269558	0.58962	0.381688	0.338977	0.298411	1.15288	-0.359574	0.264182	0.356484	0.269077	0.00920721	0.0485788	0.0287433	0.0727237	0.479144	0.0400445	0.0066209	0.0245493	0.0980313	0.219848		0.244665	0.296045	0.0646023
9.84515	0.564909	0.268122	0.5583	0.441767	0.336337	0.303665	1.17735	-0.354346	0.295433	0.389137	0.279996	-0.00354462	0.0282899	0.010773	0.0988271	0.477195	0.0668884	0.0243472	0.0312494	0.106728	0.221284		0.253462	0.29982	0.0654261
9.94345	0.574846	0.265188	0.527314	0.502409	0.338671	0.310541	1.20013	-0.34709	0.329919	0.424496	0.295492	-0.0161822	0.0072943	-0.00678381	0.12654	0.472079	0.0916592	0.0396217	0.0354949	0.115551	0.22474		0.262473	0.304499	0.0664472
10.0418	0.571853	0.261748	0.487683	0.558953	0.340546	0.316359	1.22834	-0.329456	0.359359	0.458764	0.310711	-0.0280205	-0.0104456	-0.0252787	0.154521	0.466241	0.1176	0.0567519	0.0374745	0.126896	0.226941		0.270835	0.3089	0.0674076
10.1401	0.566872	0.253439	0.44846	0.606898	0.341669	0.316525	1.25776	-0.309696	0.384902	0.492062	0.324007	-0.0384374	-0.0262909	-0.0414917	0.177662	0.459121	0.142624	0.0707709	0.0374201	0.140072	0.228609		0.27776	0.313945	0.0685084
10.2384	0.564358	0.244599	0.40687	0.644062	0.345761	0.313027	1.28365	-0.288168	0.403258	0.516609	0.335252	-0.0493809	-0.0368875	-0.0558642	0.206836	0.450225	0.165446	0.080653	0.0356687	0.15177	0.230283		0.283239	0.318316	0.0694622
10.3367	0.564409	0.23774	0.363455	0.675018	0.35468	0.312557	1.30318	-0.266633	0.420454	0.541317	0.344679	-0.0600306	-0.0442287	-0.0709129	0.236427	0.438773	0.184438	0.0859179	0.0345331	0.162206	0.232235		0.288105	0.322419	0.0703576
10.435	0.561935	0.232194	0.315875	0.706604	0.364706	0.307645	1.32143	-0.24182	0.432705	0.5592	0.355621	-0.0724994	-0.0489018	-0.0861346	0.264316	0.423415	0.201538	0.0947172	0.0318784	0.172859	0.233052		0.291921	0.326373	0.0712204
10.5333	0.551142	0.221072	0.266913	0.737501	0.375771	0.299218	1.34569	-0.204252	0.443995	0.564775	0.361339	-0.0843444	-0.0522497	-0.106465	0.293471	0.41324	0.21774	0.0999741	0.0301787	0.183317	0.231827		0.294755	0.33073	0.0721712
10.6316	0.550007	0.203021	0.21603	0.762949	0.383255	0.288009	1.37354	-0.16602	0.458917	0.563514	0.363401	-0.0943343	-0.0504165	-0.123124	0.318	0.404505	0.233513	0.11046	0.0262921	0.196661	0.231355		0.297597	0.335788	0.073275
10.7299	0.544621	0.178936	0.162571	0.785444	0.394458	0.2763	1.40121	-0.133382	0.471177	0.557808	0.367753	-0.102292	-0.0458751	-0.137038	0.345683	0.391888	0.252955	0.118253	0.0214791	0.212384	0.229616		0.299712	0.341412	0.0745023
10.8282	0.53332	0.148102	0.110945	0.803161	0.401225	0.270386	1.4259	-0.0959087	0.484274	0.542956	0.368501	-0.108626	-0.0395721	-0.145442	0.371476	0.377905	0.271908	0.124505	0.018033	0.228078	0.225127		0.300774	0.345954	0.0754933
10.9265	0.521082	0.109925	0.065273	0.819221	0.405995	0.261205	1.45006	-0.0610968	0.49332	0.520272	0.369848	-0.116481	-0.0308507	-0.154527	0.394908	0.364395	0.282229	0.130894	0.0148419	0.242883	0.220631		0.300192	0.351099	0.0766161
11.0248	0.509343	0.071822	0.0240492	0.827713	0.410027	0.248651	1.47178	-0.0333865	0.495754	0.494102	0.375004	-0.119955	-0.0192364	-0.159869	0.417674	0.356478	0.288803	0.138687	0.0123031	0.254378	0.217253		0.299113	0.355616	0.0776017
11.1231	0.49587	0.0286459	-0.0134548	0.831539	0.421568	0.23317	1.48946	-0.00762717	0.495663	0.467021	0.390915	-0.122627	-0.00188928	-0.154594	0.438844	0.353681	0.297649	0.14575	0.00832416	0.264949	0.209691		0.298693	0.359411	0.0784299
11.2214	0.47573	-0.022158	-0.0408278	0.831135	0.441342	0.22823	1.50426	0.0138967	0.492643	0.436211	0.407956	-0.125928	0.00952372	-0.149552	0.455159	0.348891	0.303699	0.152042	0.00674638	0.276128	0.198058		0.297294	0.363222	0.0792616
11.3197	0.451844	-0.0674292	-0.0685345	0.826341	0.461327	0.226323	1.51894	0.0398991	0.48814	0.405375	0.427197	-0.13021	0.0211344	-0.135511	0.470844	0.344415	0.308368	0.152355	0.00492725	0.288212	0.185621		0.29617	0.366712	0.0800231
11.418	0.42945	-0.10624	-0.094679	0.815122	0.473646	0.227402	1.535	0.0628977	0.483362	0.374323	0.440836	-0.139245	0.0330684	-0.118626	0.485923	0.345355	0.312857	0.148968	-0.000665368	0.300117	0.175917		0.294514	0.370518	0.0808537
11.5163	0.405683	-0.143969	-0.112416	0.804431	0.485566	0.22224	1.54952	0.0877991	0.477189	0.348566	0.455992	-0.146693	0.0466114	-0.10314	0.504582	0.35162	0.314865	0.145659	-0.00802012	0.310263	0.165825		0.293437	0.374459	0.0817137
11.6146	0.384394	-0.178872	-0.136776	0.78968	0.502924	0.208897	1.55781	0.108324	0.460203	0.322118	0.466518	-0.153504	0.0592233	-0.0842342	0.51722	0.359101	0.308819	0.138351	-0.0152841	0.321346	0.15818		0.290211	0.377669	0.0824141
11.7129	0.361241	-0.209431	-0.157255	0.77506	0.521563	0.189038	1.56784	0.12358	0.445702	0.30076	0.466772	-0.15567	0.0765565	-0.0685251	0.529513	0.371578	0.303664	0.129112	-0.0200016	0.329732	0.149518		0.287159	0.381094	0.0831615
11.8112	0.334908	-0.238419	-0.17503	0.75737	0.539698	0.164745	1.57143	0.142504	0.43094	0.276962	0.468193	-0.159752	0.0938008	-0.0528709	0.540598	0.38306	0.301115	0.12001	-0.0249751	0.337566	0.139079		0.283378	0.383698	0.0837298
11.9095	0.306948	-0.26291	-0.185311	0.739906	0.561012	0.146876	1.5815	0.164485	0.417192	0.258071	0.463461	-0.16064	0.110732	-0.039143	0.543231	0.39631	0.298051	0.107268	-0.0306883	0.341027	0.131341		0.280415	0.386708	0.0843865
12.0078	0.283371	-0.280369	-0.19034	0.715026	0.580831	0.126637	1.59146	0.186118	0.399755	0.241635	0.452136	-0.16416	0.127753	-0.0261057	0.544193	0.414274	0.300791	0.0993198	-0.0314671	0.341766	0.124007		0.277935	0.388699	0.0848211
12.1061	0.269747	-0.296411	-0.182735	0.690226	0.600686	0.105895	1.59328	0.202832	0.386236	0.221247	0.440595	-0.169175	0.144517	-0.0107548	0.541206	0.431568	0.300163	0.093893	-0.031391	0.341027	0.116144		0.275657	0.388964	0.0848789
12.2044	0.258831	-0.311551	-0.169552	0.676519	0.61926	0.0898258	1.59061	0.222566	0.378141	0.201786	0.428008	-0.172516	0.159929	0.00621202	0.533124	0.448976	0.302599	0.0877539	-0.0313682	0.340037	0.108194		0.274637	0.38873	0.0848278
12.3027	0.247345	-0.323641	-0.152778	0.668658	0.63702	0.0789514	1.59478	0.237396	0.374353	0.191112	0.414025	-0.174419	0.169491	0.0213469	0.515492	0.467003	0.309618	0.0836438	-0.0308712	0.337783	0.103192		0.274738	0.389324	0.0849574
12.401	0.236158	-0.338187	-0.128962	0.662174	0.6488	0.0688109	1.60023	0.249427	0.371668	0.178817	0.40013	-0.175034	0.177758	0.0332045	0.495181	0.486187	0.320363	0.0871398	-0.0307102	0.334692	0.100414		0.275155	0.389894	0.0850818
12.4994	0.228321	-0.350066	-0.0996752	0.649326	0.65428	0.069024	1.60168	0.257741	0.36916	0.169078	0.384998	-0.173212	0.183703	0.0446568	0.472033	0.50588	0.332578	0.0863417	-0.0315231	0.33129	0.0988639		0.275451	0.388752	0.0848327
12.5977	0.222416	-0.357843	-0.0706274	0.633416	0.654328	0.0738928	1.59738	0.257425	0.362659	0.167402	0.369054	-0.170444	0.190078	0.061356	0.443099	0.521784	0.347434	0.0864033	-0.0331149	0.328683	0.0971318		0.275329	0.385654	0.0841565
12.696	0.206291	-0.360324	-0.0393609	0.624522	0.652198	0.0843576	1.58931	0.255841	0.350795	0.170375	0.353782	-0.165408	0.195305	0.0791464	0.415939	0.536482	0.362378	0.0841247	-0.0344673	0.32283	0.0940976		0.275153	0.381751	0.0833049
12.7943	0.190798	-0.357269	-0.00472087	0.616855	0.64059	0.0916292	1.57796	0.257651	0.336804	0.178688	0.331232	-0.164748	0.196851	0.0963534	0.384338	0.553714	0.379117	0.0853345	-0.0334306	0.31407	0.091847		0.27446	0.376801	0.0822246
12.8926	0.178398	-0.346384	0.0291734	0.611572	0.632897	0.0952832	1.56735	0.254358	0.321251	0.188367	0.306443	-0.16863	0.195806	0.108034	0.356073	0.57221	0.394846	0.0916112	-0.0309401	0.306005	0.0898441		0.273979	0.372473	0.0812802
12.9909	0.169026	-0.327253	0.0594159	0.60917	0.625791	0.101134	1.5605	0.247336	0.303766	0.197419	0.288803	-0.174419	0.191723	0.119586	0.328304	0.586613	0.417287	0.0991017	-0.0301294	0.296678	0.0877425		0.274171	0.368942	0.0805098
13.0892	0.162589	-0.307407	0.0928056	0.608379	0.614428	0.111363	1.55373	0.247237	0.288141	0.209971	0.268479	-0.180989	0.186015	0.128674	0.300058	0.599851	0.440509	0.110002	-0.0285888	0.290143	0.0873292		0.275368	0.36542	0.0797412
13.1875	0.154041	-0.281214	0.122304	0.604633	0.600301	0.125622	1.55328	0.251193	0.276188	0.222456	0.241083	-0.187354	0.18088	0.13023	0.268933	0.611432	0.457913	0.123407	-0.0273836	0.284287	0.0913301		0.27636	0.362601	0.0791261
13.2858	0.14684	-0.242852	0.144681	0.60319	0.581919	0.130646	1.55197	0.251661	0.266874	0.236765	0.212367	-0.194175	0.180987	0.131358	0.241318	0.620136	0.478041	0.137827	-0.0261375	0.280346	0.0971691		0.277663	0.359434	0.078435
13.3841	0.144124	-0.208603	0.17658	0.594041	0.562072	0.13918	1.54976	0.248861	0.259744	0.245225	0.176794	-0.203497	0.178921	0.125913	0.21543	0.627079	0.492991	0.162257	-0.023214	0.278451	0.10291		0.278334	0.356322	0.0777558
13.4824	0.142225	-0.180586	0.204597	0.583793	0.545655	0.148024	1.54739	0.251108	0.249644	0.24994	0.147507	-0.208882	0.179775	0.122052	0.185415	0.633121	0.500933	0.187934	-0.0185132	0.276183	0.105483		0.278705	0.353758	0.0771964
13.5807	0.137871	-0.155169	0.233004	0.568436	0.534397	0.160608	1.54737	0.25257	0.239324	0.250372	0.113096	-0.215665	0.182553	0.123038	0.153325	0.640149	0.506624	0.209493	-0.00984076	0.272859	0.10746		0.278661	0.35234	0.076887
13.679	0.129702	-0.130955	0.273198	0.554503	0.520585	0.178784	1.54955	0.254934	0.23349	0.251728	0.0772325	-0.219313	0.186733	0.124624	0.123969	0.644248	0.513711	0.231698	-0.00391086	0.265425	0.110549		0.279547	0.35167	0.0767408
13.7773	0.12272	-0.108116	0.310258	0.539327	0.510425	0.197416	1.55109	0.259255	0.223419	0.249862	0.0480641	-0.224326	0.191355	0.126376	0.0936078	0.645694	0.519882	0.254309	-0.000392878	0.259093	0.115216		0.280216	0.351605	0.0767265
13.8756	0.120641	-0.085862	0.346664	0.522065	0.502799	0.220965	1.5505	0.258794	0.215614	0.247212	0.0182637	-0.228624	0.19741	0.125561	0.0632837	0.648982	0.521188	0.276305	0.00126733	0.254552	0.122895		0.280975	0.351692	0.0767455
13.9739	0.118393	-0.0665848	0.37618	0.500648	0.493757	0.244327	1.54027	0.252794	0.20835	0.239445	-0.0077072	-0.232818	0.20405	0.124564	0.0377172	0.64864	0.51959	0.298947	0.00304557	0.250309	0.128566		0.280118	0.350204	0.0764208
14.0722	0.116563	-0.0539432	0.403495	0.484728	0.487467	0.271193	1.52849	0.246901	0.198404	0.227261	-0.0312527	-0.23423	0.210895	0.124382	0.0122406	0.645848	0.515575	0.312816	0.00167377	0.249314	0.133057		0.278613	0.349158	0.0761926
14.1705	0.111463	-0.0441242	0.427079	0.470916	0.479668	0.301323	1.5201	0.238906	0.186259	0.218062	-0.0526114	-0.231146	0.215444	0.12429	-0.00782044	0.642993	0.51664	0.321236	0.000572184	0.248618	0.139874		0.277512	0.348823	0.0761194
14.2688	0.106123	-0.0296593	0.444048	0.450077	0.476292	0.32874	1.51422	0.229461	0.175377	0.209862	-0.0697919	-0.230441	0.218638	0.120669	-0.0195831	0.637321	0.51133	0.32614	0.000352676	0.248253	0.147209		0.275935	0.348207	0.0759849
14.3671	0.104791	-0.0197301	0.459766	0.423676	0.476066	0.354344	1.4994	0.230679	0.165877	0.197868	-0.0796418	-0.233065	0.223171	0.116861	-0.029416	0.633423	0.501595	0.328443	0.000766756	0.251053	0.153238		0.274246	0.346087	0.0755223
14.4654	0.103264	-0.00373212	0.466544	0.398708	0.480465	0.378802	1.48499	0.235032	0.1567	0.19199	-0.0870323	-0.240187	0.224738	0.114575	-0.0377813	0.631698	0.492376	0.329242	0.00219133	0.25424	0.157871		0.273081	0.34415	0.0750997
14.5637	0.0959634	0.0121047	0.470359	0.375939	0.494809	0.392534	1.47142	0.2372	0.155475	0.188183	-0.0962732	-0.248572	0.228281	0.114258	-0.0422535	0.629885	0.486688	0.33288	0.00483818	0.25712	0.164329		0.272627	0.342713	0.0747861
14.662	0.0995499	0.0285804	0.47462	0.354235	0.517395	0.40417	1.4543	0.239559	0.159585	0.182341	-0.101729	-0.257215	0.228763	0.111539	-0.0407258	0.627285	0.479515	0.335464	0.00835604	0.258259	0.171775		0.273125	0.340325	0.0742651
14.7603	0.112599	0.0502294	0.478093	0.328713	0.541894	0.411432	1.43612	0.242711	0.163269	0.175189	-0.105268	-0.267194	0.228756	0.104731	-0.0433467	0.624524	0.467778	0.334598	0.0119032	0.258705	0.182394		0.27323	0.337674	0.0736865
14.8586	0.129919	0.0696791	0.48058	0.298615	0.576492	0.421079	1.41891	0.240458	0.172394	0.164607	-0.0991393	-0.273191	0.234491	0.0954202	-0.0454656	0.621384	0.454172	0.331775	0.0113569	0.259126	0.192633		0.274062	0.335206	0.073148
14.957	0.149565	0.0865599	0.486743	0.266146	0.606528	0.429117	1.39911	0.238599	0.184093	0.159528	-0.0857717	-0.273517	0.239194	0.0882308	-0.0515751	0.616871	0.442279	0.318616	0.00894047	0.257743	0.206308		0.27492	0.331862	0.0724182
15.0553	0.165027	0.101945	0.494061	0.23167	0.632585	0.433321	1.37175	0.238407	0.198682	0.157589	-0.0845234	-0.269705	0.242351	0.0838086	-0.0587572	0.617347	0.423103	0.298633	0.00912798	0.257585	0.222489		0.274595	0.327841	0.0715408
15.1536	0.174183	0.11725	0.500415	0.198474	0.658966	0.429149	1.33854	0.233302	0.2114	0.151532	-0.0800291	-0.264496	0.242726	0.0792205	-0.0643482	0.612827	0.405079	0.274611	0.0116173	0.256154	0.237705		0.272585	0.322839	0.0704492
15.2519	0.188247	0.131262	0.504388	0.168198	0.679189	0.422199	1.29659	0.220528	0.225249	0.146792	-0.0746376	-0.256127	0.240072	0.0770533	-0.0643469	0.60938	0.394179	0.247604	0.0168883	0.255114	0.250291		0.270386	0.315973	0.068951
15.3502	0.205662	0.13754	0.507823	0.138606	0.697185	0.418405	1.2523	0.211496	0.238266	0.141048	-0.0683189	-0.245512	0.233032	0.0750172	-0.0671606	0.613507	0.383204	0.220977	0.0211548	0.251176	0.262902		0.268015	0.309742	0.0675912
15.4485	0.224114	0.148888	0.504524	0.121319	0.716651	0.406236	1.20073	0.20084	0.247852	0.145888	-0.0611026	-0.233984	0.227822	0.0754698	-0.0729606	0.61761	0.380594	0.186908	0.0247295	0.243853	0.2765		0.265832	0.30239	0.0659868
15.5468	0.240032	0.166196	0.501702	0.107056	0.735411	0.393899	1.14661	0.186791	0.264037	0.152132	-0.0559834	-0.221816	0.219618	0.0725324	-0.0726904	0.619407	0.388247	0.162266	0.0290421	0.237133	0.292581		0.264962	0.294963	0.0643662
15.6451	0.262534	0.187107	0.493563	0.10035	0.743721	0.387201	1.08995	0.173232	0.284928	0.160371	-0.0501017	-0.207919	0.208246	0.0680337	-0.0711923	0.618512	0.39571	0.137405	0.0301745	0.233111	0.30903		0.264475	0.286544	0.0625291
15.7434	0.285102	0.208625	0.476739	0.094741	0.751671	0.371221	1.03248	0.158536	0.305915	0.171882	-0.0477949	-0.191608	0.195587	0.061075	-0.0700675	0.622711	0.403941	0.11164	0.0315631	0.232634	0.322915		0.26331	0.278676	0.0608121
15.8417	0.306155	0.232622	0.463203	0.0902496	0.757889	0.357426	0.96996	0.139231	0.328454	0.183431	-0.0486237	-0.172008	0.176712	0.0594548	-0.0671224	0.627452	0.41308	0.087287	0.0335868	0.232412	0.335246		0.262195	0.27093	0.0591217
15.94	0.319782	0.25682	0.448498	0.0876733	0.763151	0.337954	0.907143	0.120512	0.352462	0.195012	-0.0515742	-0.151466	0.15117	0.0615273	-0.0624168	0.63016	0.425257	0.0690405	0.0381164	0.229925	0.346617		0.260732	0.263589	0.0575199
16.0383	0.337029	0.278058	0.43098	0.0855831	0.766958	0.314683	0.851403	0.104086	0.376036	0.210844	-0.0526754	-0.134324	0.124688	0.061693	-0.0573482	0.63393	0.440199	0.0494277	0.0415159	0.228036	0.358248		0.259479	0.258429	0.0563939
16.1366	0.352763	0.30305	0.41032	0.0820263	0.769164	0.287838	0.799907	0.0861616	0.40638	0.230934	-0.0545151	-0.114184	0.0945758	0.061503	-0.0494539	0.637191	0.453336	0.036588	0.0470524	0.221042	0.37106		0.258702	0.254384	0.0555111
16.2349	0.369207	0.327101	0.389038	0.0748993	0.771745	0.257344	0.754107	0.0704368	0.434898	0.248499	-0.0611696	-0.0916945	0.0640669	0.0620348	-0.0443168	0.639883	0.461993	0.0276561	0.0534098	0.213073	0.382091		0.257348	0.252209	0.0550364
16.3332	0.383845	0.342262	0.368004	0.0663037	0.769696	0.227928	0.708938	0.0513209	0.453596	0.261896	-0.0724541	-0.0671368	0.0380781	0.0633184	-0.0418606	0.646973	0.473786	0.0261535	0.0612113	0.20487	0.389324		0.25505	0.250731	0.0547139
16.4315	0.390482	0.35938	0.345238	0.0629142	0.761503	0.199397	0.672446	0.0226102	0.466927	0.275093	-0.0917482	-0.0373324	0.0162816	0.064214	-0.0329517	0.648794	0.485236	0.0298488	0.068338	0.193015	0.39571		0.252162	0.249437	0.0544316
16.5298	0.397356	0.372175	0.330462	0.0570584	0.752725	0.172174	0.637088	-0.0058349	0.48053	0.279347	-0.112159	-0.00123856	-0.00148971	0.0640291	-0.0197235	0.643781	0.496503	0.0289299	0.0750899	0.180811	0.400907		0.248977	0.248435	0.054213
16.6281	0.40898	0.383894	0.310979	0.056166	0.738344	0.153925	0.607394	-0.0277576	0.487073	0.283169	-0.129543	0.0387495	-0.0212435	0.0623568	-0.00876876	0.637614	0.5009	0.0302886	0.0820051	0.170529	0.403702		0.246131	0.246705	0.0538354
16.7264	0.407967	0.398542	0.294795	0.0521874	0.718902	0.131427	0.58443	-0.0512709	0.49032	0.285191	-0.146808	0.0800853	-0.0397276	0.0643476	-0.00223409	0.633711	0.507679	0.0324583	0.0862781	0.161524	0.405151		0.242617	0.245973	0.0536757
16.8247	0.398906	0.405334	0.278618	0.0495574	0.696615	0.109277	0.563754	-0.0726729	0.50075	0.287464	-0.165025	0.12076	-0.0606675	0.0714224	0.0103526	0.63	0.520353	0.0402399	0.0899179	0.156826	0.402506		0.239728	0.245437	0.0535588
16.923	0.384804	0.411467	0.260199	0.0554786	0.6681	0.0879435	0.542226	-0.0893261	0.508113	0.291214	-0.193826	0.160609	-0.0851606	0.0788952	0.0281446	0.625399	0.531057	0.0500195	0.0962038	0.153397	0.402208		0.236532	0.244966	0.0534559
17.0213	0.3671	0.414271	0.235266	0.0641676	0.649866	0.0684225	0.523479	-0.105714	0.509714	0.287189	-0.225621	0.195555	-0.106481	0.0881978	0.0520328	0.623813	0.542537	0.0674027	0.101864	0.152489	0.399514		0.233575	0.245618	0.0535983
17.1196	0.350801	0.411722	0.206907	0.0740782	0.641295	0.0525961	0.508861	-0.118858	0.508542	0.277648	-0.246764	0.227831	-0.123233	0.0918048	0.0791524	0.617898	0.561493	0.0945212	0.104765	0.150043	0.390022		0.231482	0.24618	0.0537209
17.2179	0.344452	0.410198	0.17564	0.0847767	0.63611	0.0402739	0.502646	-0.128407	0.504144	0.275293	-0.273321	0.259799	-0.135145	0.0964809	0.101411	0.615529	0.576557	0.121066	0.101433	0.148509	0.380978		0.230401	0.248712	0.0542734
17.3162	0.336844	0.411371	0.148082	0.0965809	0.638579	0.0248207	0.501106	-0.129903	0.490998	0.272227	-0.299692	0.287424	-0.144957	0.0985929	0.118916	0.613401	0.58747	0.149844	0.0975298	0.145424	0.373008		0.229413	0.251776	0.054942
17.4146	0.328699	0.415078	0.122227	0.104465	0.642312	0.00844916	0.502895	-0.131634	0.484216	0.2702	-0.323471	0.316048	-0.149946	0.101073	0.139864	0.603938	0.591386	0.179973	0.0938513	0.142927	0.36477		0.22892	0.254668	0.0555732
17.5129	0.316105	0.416436	0.0963398	0.105567	0.640741	-0.000426461	0.516697	-0.127727	0.479749	0.262995	-0.341309	0.345511	-0.152899	0.104556	0.161303	0.595467	0.585152	0.211032	0.0890483	0.140591	0.356536		0.228641	0.256501	0.0559731
17.6112	0.304481	0.415124	0.0717259	0.101195	0.640506	-0.0113048	0.534399	-0.128626	0.467692	0.258	-0.355092	0.371558	-0.15499	0.108865	0.180575	0.585241	0.574592	0.227953	0.0814097	0.136803	0.345765		0.22647	0.258504	0.0564102
17.7095	0.2845	0.412497	0.049091	0.0909237	0.647077	-0.0345135	0.553322	-0.132744	0.453596	0.256643	-0.364731	0.394565	-0.154042	0.111017	0.202423	0.57777	0.566003	0.247325	0.0736025	0.130958	0.335652		0.223854	0.261958	0.057164
17.8078	0.265802	0.40682	0.0283099	0.0789852	0.653476	-0.0484213	0.575721	-0.136333	0.437984	0.253878	-0.364492	0.407776	-0.151456	0.113533	0.224168	0.570362	0.559785	0.269444	0.067525	0.125651	0.3262		0.222129	0.264212	0.0576557
17.9061	0.253111	0.403803	0.00021501	0.0674578	0.657827	-0.0646225	0.611234	-0.138632	0.422984	0.255883	-0.358342	0.417539	-0.140681	0.111221	0.241834	0.561831	0.55554	0.29162	0.0609924	0.121222	0.317918		0.221426	0.267117	0.0582897
18.0044	0.246276	0.400459	-0.0282616	0.0535308	0.665049	-0.0789083	0.654653	-0.137944	0.406451	0.257196	-0.346506	0.424209	-0.124227	0.109701	0.257707	0.554657	0.549938	0.307216	0.0535138	0.117753	0.308777		0.221488	0.270131	0.0589475
18.1027	0.234353	0.400662	-0.0459223	0.0398668	0.674587	-0.0925138	0.698804	-0.136047	0.386605	0.253774	-0.333495	0.431924	-0.108933	0.108741	0.269497	0.550848	0.54219	0.326511	0.0466096	0.117511	0.301732		0.222253	0.273538	0.059691
18.201	0.223761	0.400862	-0.0586271	0.0285808	0.684133	-0.106686	0.740474	-0.131248	0.362001	0.247297	-0.31612	0.431887	-0.0873866	0.104626	0.272974	0.549075	0.534752	0.341809	0.0359604	0.122073	0.293597		0.222562	0.275869	0.0601996
18.2993	0.21088	0.407702	-0.0735947	0.0213419	0.686514	-0.114225	0.777252	-0.128788	0.337563	0.244786	-0.293849	0.423491	-0.0645043	0.101404	0.27909	0.55048	0.528306	0.35794	0.0230077	0.127717	0.285672		0.223247	0.277368	0.0605267
18.3976	0.19568	0.418793	-0.0839826	0.0180846	0.68512	-0.116382	0.814007	-0.120699	0.318555	0.249441	-0.265903	0.415123	-0.0446093	0.0991423	0.285724	0.551046	0.519324	0.372604	0.00795279	0.131681	0.28483		0.225501	0.278106	0.0606877
18.4959	0.186607	0.430643	-0.0934615	0.0138363	0.688564	-0.115268	0.847655	-0.105819	0.303439	0.255715	-0.233512	0.406739	-0.0282304	0.098462	0.285845	0.559169	0.513756	0.380599	-0.00869381	0.138593	0.283187		0.228944	0.27913	0.0609111
18.5942	0.176409	0.44033	-0.108197	0.0155251	0.687208	-0.114475	0.884325	-0.0938069	0.289206	0.272122	-0.196689	0.393962	-0.0138103	0.098388	0.277435	0.579137	0.506578	0.391841	-0.025743	0.147709	0.28456		0.232953	0.281237	0.0613709
18.6925	0.163895	0.44989	-0.115567	0.0131407	0.683374	-0.116402	0.914524	-0.0876088	0.279621	0.289985	-0.154139	0.373471	0.0007301	0.0955654	0.265591	0.604603	0.503656	0.402132	-0.0431423	0.155468	0.285499		0.236395	0.283473	0.0618589
18.7908	0.156348	0.454434	-0.131843	0.0162988	0.679677	-0.114132	0.946183	-0.0775364	0.272623	0.310462	-0.11178	0.350747	0.0180132	0.0848447	0.254539	0.62813	0.498494	0.417776	-0.0570048	0.164799	0.286999		0.240384	0.286214	0.062457
18.8891	0.153176	0.46389	-0.149494	0.0197866	0.679665	-0.113268	0.983488	-0.0683125	0.261437	0.333822	-0.0681249	0.3287	0.0397715	0.0694162	0.241196	0.652972	0.491243	0.431096	-0.0678405	0.168407	0.292319		0.244921	0.290924	0.0634847
18.9874	0.14977	0.472299	-0.164594	0.0215269	0.678846	-0.115889	1.02619	-0.0569185	0.247595	0.354142	-0.0139479	0.304412	0.0601351	0.0564681	0.222835	0.67986	0.488739	0.44198	-0.0782287	0.170748	0.296723		0.249652	0.296853	0.0647787
19.0857	0.144506	0.483712	-0.174726	0.0217927	0.661811	-0.118384	1.06593	-0.0429567	0.238839	0.382903	0.0396491	0.282581	0.0789068	0.0395176	0.200082	0.706121	0.487104	0.449927	-0.0879353	0.170259	0.301394		0.253858	0.302479	0.0660063
19.184	0.140591	0.498366	-0.180277	0.0180511	0.633551	-0.120248	1.10097	-0.0287881	0.234535	0.420544	0.090105	0.260799	0.091504	0.0280838	0.171077	0.735869	0.481152	0.45213	-0.0979367	0.171602	0.312311		0.257809	0.308177	0.0672498
19.2823	0.129929	0.508563	-0.181611	0.0118409	0.603874	-0.116079	1.13508	-0.0161472	0.238763	0.452507	0.148137	0.236485	0.100226	0.0221403	0.14743	0.766714	0.478836	0.456997	-0.104403	0.171178	0.321996		0.262498	0.313977	0.0685154
19.3806	0.112246	0.509734	-0.183165	0.00459608	0.568856	-0.109003	1.17234	-0.00758455	0.250631	0.48593	0.210652	0.215297	0.106775	0.0265479	0.126334	0.794699	0.47526	0.460267	-0.111156	0.170277	0.332708		0.26725	0.320349	0.0699058
19.4789	0.0908417	0.509007	-0.181341	0.00393574	0.537096	-0.100852	1.21001	-0.00208044	0.256753	0.522091	0.268571	0.190781	0.109348	0.0314356	0.103487	0.827915	0.477807	0.459096	-0.117874	0.169151	0.342968		0.271816	0.328544	0.0716942
19.5772	0.0746548	0.504531	-0.173017	0.00795313	0.513932	-0.0968881	1.23927	-0.000569808	0.26685	0.553992	0.320313	0.165302	0.109367	0.0385292	0.0836682	0.864566	0.483821	0.459539	-0.123889	0.171469	0.351641		0.276906	0.336567	0.073445
19.6755	0.0629747	0.50025	-0.159786	0.0225218	0.49028	-0.0936957	1.2657	0.0112758	0.281159	0.584468	0.366351	0.144364	0.108781	0.0456244	0.0626622	0.905933	0.488184	0.46829	-0.127177	0.174699	0.36269		0.284073	0.344134	0.0750961
19.7738	0.0576493	0.491593	-0.142458	0.0406216	0.467469	-0.0843559	1.28929	0.0305697	0.296122	0.61072	0.411555	0.12592	0.106097	0.0599024	0.037269	0.944005	0.494199	0.476437	-0.127721	0.178585	0.371434		0.292138	0.350116	0.0764016
19.8722	0.052543	0.48208	-0.120389	0.0580591	0.445715	-0.0778692	1.30855	0.0513032	0.312246	0.631462	0.453588	0.112303	0.10385	0.0771322	0.0125078	0.978436	0.496783	0.481569	-0.12716	0.179808	0.380053		0.299646	0.355072	0.0774831
19.9705	0.0366044	0.467862	-0.0862922	0.0759438	0.421036	-0.0752154	1.31824	0.0721267	0.326825	0.648773	0.491626	0.0976471	0.0950106	0.0965899	-0.00588241	1.01241	0.495788	0.485567	-0.12572	0.179857	0.388668		0.305594	0.358656	0.0782652
20.0688	0.020365	0.452766	-0.048718	0.0987392	0.394169	-0.0699946	1.32147	0.0943863	0.346975	0.669058	0.526708	0.0872528	0.085019	0.113808	-0.0256307	1.04529	0.498063	0.489074	-0.125255	0.180176	0.397484		0.311962	0.361821	0.0789558
20.1671	0.00967807	0.437543	-0.0190835	0.122977	0.366729	-0.0595452	1.32079	0.115775	0.373662	0.694488	0.556392	0.0776751	0.079356	0.129829	-0.039963	1.07426	0.502138	0.490934	-0.12531	0.176071	0.403478		0.31847	0.364629	0.0795686
20.2654	-0.0011518	0.417458	0.00591572	0.143142	0.341408	-0.0478883	1.32086	0.132948	0.395821	0.721311	0.586083	0.0727991	0.0699003	0.149624	-0.0473211	1.09864	0.50804	0.493833	-0.120926	0.172062	0.410132		0.32489	0.367493	0.0801935
20.3637	-0.0117367	0.392055	0.0359603	0.162213	0.328518	-0.0402581	1.32024	0.15232	0.422604	0.747497	0.613619	0.0725892	0.0597677	0.168199	-0.0571549	1.11613	0.515839	0.493146	-0.114958	0.168318	0.418468		0.331589	0.369956	0.0807309
20.462	-0.0148745	0.366504	0.0624826	0.17911	0.323599	-0.0420797	1.31813	0.164987	0.453136	0.76582	0.639699	0.0693555	0.0513247	0.185652	-0.0659328	1.1298	0.530159	0.489801	-0.108869	0.166218	0.423171		0.337485	0.372452	0.0812758
20.5603	-0.0237592	0.336477	0.0928438	0.191997	0.313432	-0.0525253	1.31393	0.173416	0.484309	0.781528	0.667533	0.0600567	0.0424322	0.203272	-0.0733558	1.13815	0.545638	0.489702	-0.099603	0.163589	0.429296		0.341826	0.375432	0.0819259
20.6586	-0.0326715	0.309366	0.123193	0.200271	0.308795	-0.0610331	1.30514	0.184818	0.514945	0.78911	0.688879	0.0550602	0.0340317	0.2203	-0.0749507	1.13436	0.559151	0.489714	-0.0896498	0.158883	0.431391		0.345196	0.375798	0.0820059
20.7569	-0.0399429	0.277126	0.148612	0.211431	0.31128	-0.0702911	1.2972	0.203093	0.537746	0.789761	0.69685	0.0544257	0.0300111	0.240935	-0.0711029	1.12427	0.569947	0.487902	-0.079434	0.155229	0.433012		0.348003	0.374039	0.081622
20.8552	-0.0477664	0.245014	0.183907	0.221173	0.317421	-0.0736041	1.2828	0.218445	0.557944	0.78601	0.700088	0.0518698	0.026527	0.266845	-0.0676182	1.11211	0.5853	0.477858	-0.0722074	0.149385	0.434562		0.350288	0.370987	0.080956
20.9535	-0.0561205	0.215295	0.224244	0.228166	0.323944	-0.0740238	1.25867	0.230454	0.574833	0.777888	0.700211	0.0516745	0.0202929	0.294805	-0.065583	1.09411	0.598481	0.466252	-0.0677513	0.147912	0.434448		0.351343	0.366147	0.0798999
21.0518	-0.0631951	0.186114	0.26443	0.228527	0.335149	-0.0680611	1.22682	0.237974	0.597791	0.772588	0.692863	0.0526993	0.0162808	0.321108	-0.0606805	1.06679	0.609206	0.456346	-0.065264	0.148083	0.430945		0.351739	0.35955	0.0784603
21.1501	-0.0665577	0.152658	0.305692	0.225269	0.355358	-0.0580893	1.19628	0.241736	0.617815	0.762397	0.685812	0.0545101	0.013061	0.345707	-0.0577906	1.03363	0.617631	0.452134	-0.0627045	0.148088	0.427781		0.351925	0.352721	0.07697
21.2484	-0.0677939	0.121822	0.34336	0.229029	0.380386	-0.0515331	1.17212	0.241836	0.634918	0.746457	0.675663	0.0591434	0.017939	0.366413	-0.0495217	0.997279	0.625582	0.446016	-0.0579342	0.146992	0.422943		0.352434	0.345525	0.0753998
21.3467	-0.0634562	0.0913821	0.377003	0.239356	0.408258	-0.0503389	1.14674	0.239016	0.648448	0.733723	0.661255	0.0668471	0.0244523	0.379285	-0.042855	0.958358	0.633121	0.436703	-0.0528121	0.149595	0.417266		0.352445	0.338113	0.0737822
21.445	-0.0506004	0.0657512	0.409187	0.24809	0.440745	-0.0475847	1.11349	0.235401	0.65777	0.715979	0.641338	0.0707115	0.0347913	0.379726	-0.0389276	0.919305	0.650281	0.429476	-0.0461571	0.154057	0.410292		0.352053	0.329505	0.0719038
21.5433	-0.0341692	0.0432475	0.438425	0.252091	0.467646	-0.043954	1.0794	0.233033	0.663496	0.692773	0.624495	0.0766958	0.0479632	0.383453	-0.034836	0.874922	0.666632	0.422716	-0.0388034	0.159937	0.404467		0.351411	0.320074	0.0698458
21.6416	-0.0172428	0.0221937	0.460022	0.25503	0.488018	-0.0381223	1.05009	0.227788	0.664757	0.678648	0.613641	0.0838679	0.062291	0.378008	-0.0336891	0.82077	0.686058	0.415647	-0.0301673	0.162687	0.399932		0.350011	0.311476	0.0679696
21.7399	-0.00326615	-2.81e-05	0.475722	0.250804	0.506681	-0.0317028	1.01896	0.211217	0.662511	0.666266	0.604773	0.086044	0.0780669	0.368732	-0.0316413	0.762403	0.709962	0.405387	-0.0214554	0.165454	0.393569		0.346593	0.303833	0.0663018
21.8382	0.00799992	-0.0186912	0.486538	0.241278	0.519848	-0.0243593	0.995556	0.191707	0.659178	0.660446	0.593552	0.0883283	0.0946173	0.346576	-0.0267807	0.706489	0.731371	0.39379	-0.0142183	0.168313	0.389459		0.342428	0.297735	0.0649711
21.9365	0.0220254	-0.0330737	0.49507	0.236587	0.535632	-0.0159339	0.975337	0.169158	0.655771	0.661321	0.578254	0.0956914	0.109777	0.315796	-0.0251532	0.653022	0.754539	0.382216	-0.00853162	0.171325	0.3892		0.338954	0.293022	0.0639426
22.0348	0.0458849	-0.0469542	0.495569	0.231324	0.555521	2.9462e-05	0.957952	0.146179	0.652537	0.661013	0.56368	0.104191	0.130073	0.281364	-0.0296809	0.599401	0.783374	0.37536	-0.00489452	0.175681	0.388075		0.336461	0.289282	0.0631266
22.1331	0.0717033	-0.0617105	0.494432	0.221793	0.577248	0.0127776	0.943698	0.115848	0.64255	0.658542	0.547927	0.109136	0.151538	0.247138	-0.0285283	0.546875	0.809389	0.370317	0.000148513	0.181327	0.387096		0.333297	0.286582	0.0625374
22.2314	0.0906229	-0.075174	0.496355	0.211985	0.596306	0.0226539	0.931808	0.0832651	0.628207	0.653548	0.533499	0.113999	0.170862	0.214417	-0.029792	0.495027	0.834349	0.361807	0.00603145	0.187582	0.386135		0.329214	0.285549	0.0623119
22.3298	0.106596	-0.0845143	0.500234	0.20777	0.61098	0.0360581	0.92111	0.0518205	0.620719	0.649996	0.513526	0.118687	0.192613	0.183686	-0.0323096	0.448237	0.854485	0.355781	0.00851583	0.189716	0.382796		0.325548	0.285334	0.0622651
22.4281	0.126266	-0.0918724	0.501314	0.205984	0.619256	0.0484686	0.908813	0.023231	0.607927	0.643486	0.492861	0.124698	0.213962	0.151515	-0.03395	0.410982	0.869559	0.351299	0.0102608	0.188999	0.377743		0.321467	0.284458	0.0620739
22.5264	0.139254	-0.0944969	0.503914	0.203647	0.619461	0.0664265	0.898134	0.000244505	0.592557	0.641151	0.465579	0.1355	0.233378	0.121735	-0.0380167	0.375223	0.878232	0.344748	0.012228	0.188388	0.371212		0.317071	0.282819	0.0617162
22.6247	0.163307	-0.0929205	0.501613	0.209337	0.625804	0.0913029	0.890903	-0.0210431	0.577449	0.643656	0.431248	0.151319	0.254351	0.0897155	-0.0389605	0.339484	0.883194	0.335465	0.0127116	0.187127	0.364171		0.314249	0.280946	0.0613074
22.723	0.190028	-0.0879804	0.501031	0.218968	0.634114	0.112893	0.884408	-0.0449256	0.55722	0.652498	0.39388	0.162206	0.275665	0.0584364	-0.0400088	0.310713	0.891352	0.3233	0.0130901	0.186048	0.359077		0.312001	0.280785	0.0612722
22.8213	0.218396	-0.0731257	0.503142	0.229659	0.634546	0.134843	0.881439	-0.0763479	0.545178	0.674891	0.36101	0.175415	0.29167	0.0255347	-0.0404782	0.28254	0.903555	0.310383	0.0109158	0.183065	0.352933		0.310913	0.283218	0.0618033
22.9196	0.240908	-0.0574544	0.501614	0.237844	0.629351	0.148302	0.884066	-0.10319	0.535022	0.70566	0.331903	0.194488	0.303909	-0.00973312	-0.0380258	0.260269	0.910614	0.301389	0.012459	0.180147	0.345177		0.310225	0.286559	0.0625322
23.0179	0.261685	-0.0460918	0.494327	0.249447	0.620062	0.163344	0.892213	-0.127174	0.525211	0.733995	0.305997	0.210022	0.317861	-0.0433511	-0.0336345	0.246751	0.919916	0.29573	0.016088	0.176326	0.33723		0.310283	0.290715	0.0634391
23.1162	0.282101	-0.0283574	0.488498	0.269728	0.61042	0.178288	0.903426	-0.151628	0.510441	0.757917	0.282598	0.228563	0.333029	-0.0749558	-0.0301532	0.241009	0.924973	0.287902	0.0220128	0.173292	0.333965		0.311575	0.294376	0.0642382
23.2145	0.302648	-0.00710175	0.479263	0.296606	0.60052	0.18856	0.91893	-0.174834	0.500292	0.78171	0.258556	0.24451	0.349686	-0.0982333	-0.0250385	0.240583	0.928499	0.271361	0.0276942	0.173236	0.330459		0.31371	0.298246	0.0650826
23.3128	0.322682	0.0144866	0.470515	0.317676	0.59137	0.200109	0.931708	-0.197416	0.491086	0.807931	0.236431	0.257754	0.363008	-0.116977	-0.0198804	0.241446	0.93401	0.260643	0.0313338	0.175452	0.323899		0.31606	0.302613	0.0660355
23.4111	0.335735	0.0451634	0.462273	0.330023	0.579502	0.218225	0.939015	-0.214875	0.482071	0.83186	0.214163	0.26853	0.378524	-0.132723	-0.0146867	0.243149	0.93611	0.247738	0.0326818	0.174428	0.317529		0.31783	0.305504	0.0666664
23.5094	0.348518	0.0773825	0.456276	0.343623	0.566433	0.235572	0.950335	-0.228681	0.477938	0.859934	0.192999	0.284767	0.39073	-0.1439	-0.00978002	0.248213	0.925347	0.229596	0.0305323	0.173374	0.311121		0.320016	0.308065	0.0672253
23.6077	0.362054	0.110621	0.451574	0.35987	0.558224	0.247026	0.960831	-0.242653	0.479319	0.892483	0.169567	0.299508	0.403685	-0.159718	-0.00387905	0.259138	0.913754	0.213078	0.0292274	0.17294	0.301472		0.322768	0.312141	0.0681146
23.706	0.373837	0.144209	0.448154	0.369727	0.551983	0.2589	0.969371	-0.251863	0.481366	0.921393	0.138135	0.312241	0.414281	-0.16962	0.00536548	0.277445	0.898355	0.193698	0.0270206	0.175958	0.291899		0.325326	0.315206	0.0687836
23.8043	0.384611	0.179403	0.444087	0.382021	0.546351	0.276813	0.981005	-0.255477	0.486136	0.946806	0.109801	0.330034	0.423761	-0.173387	0.0165233	0.296904	0.877062	0.176915	0.0233188	0.180547	0.283553		0.329371	0.31726	0.0692318
23.9026	0.396684	0.21345	0.438893	0.401613	0.548399	0.293327	0.986448	-0.268699	0.490088	0.962279	0.0851155	0.349651	0.430885	-0.168151	0.0245023	0.314746	0.855418	0.159316	0.0200804	0.186917	0.270561		0.33293	0.318938	0.069598
24.0009	0.407178	0.247261	0.428619	0.420209	0.547263	0.311109	0.989924	-0.280707	0.491502	0.975794	0.0614818	0.362054	0.438662	-0.154922	0.0374663	0.32946	0.831155	0.144488	0.0185075	0.197332	0.252972		0.336039	0.319289	0.0696745
24.0992	0.418005	0.282462	0.41971	0.437942	0.547131	0.324868	0.986535	-0.292433	0.491032	0.989528	0.0378559	0.375204	0.445317	-0.139479	0.0539847	0.344287	0.801299	0.122517	0.0201833	0.207346	0.236506		0.338562	0.319012	0.0696141
24.1975	0.425932	0.317417	0.408287	0.456537	0.548271	0.343855	0.979495	-0.298797	0.487074	1.00529	0.0138541	0.391586	0.45074	-0.123362	0.0646783	0.359073	0.771692	0.101067	0.023645	0.216165	0.219714		0.341058	0.318946	0.0695998
24.2958	0.440595	0.353772	0.39201	0.477621	0.550306	0.362098	0.97215	-0.300575	0.483918	1.01994	-0.0105145	0.40841	0.45537	-0.102437	0.0769655	0.373602	0.741223	0.0856523	0.026911	0.226548	0.204692		0.344679	0.318552	0.0695137
24.3941	0.456727	0.391535	0.375936	0.496014	0.5552	0.378354	0.957164	-0.301412	0.480958	1.02942	-0.0317694	0.426349	0.457037	-0.088294	0.0883667	0.383047	0.718212	0.0698903	0.0304314	0.241314	0.191209		0.34789	0.318295	0.0694577
24.4924	0.468255	0.428591	0.357753	0.509864	0.562016	0.397469	0.942315	-0.305171	0.481364	1.04248	-0.0496354	0.44426	0.459987	-0.0734422	0.100142	0.388503	0.699048	0.0528388	0.0368498	0.260252	0.175932		0.351413	0.319245	0.069665
24.5907	0.483501	0.460484	0.340178	0.52248	0.576572	0.41754	0.918895	-0.308154	0.479757	1.05516	-0.0609419	0.456509	0.464138	-0.0587442	0.112099	0.398692	0.682083	0.039316	0.0442236	0.277653	0.161092		0.355359	0.319715	0.0697675
24.689	0.487694	0.494301	0.32327	0.531653	0.591213	0.438091	0.891816	-0.314147	0.474999	1.06271	-0.0682844	0.465571	0.468484	-0.0411813	0.121815	0.406025	0.668319	0.0312248	0.0506049	0.296331	0.146191		0.358414	0.319506	0.069722
24.7874	0.488884	0.523973	0.305402	0.535417	0.602097	0.46173	0.863109	-0.318874	0.477195	1.06579	-0.0694041	0.475854	0.474408	-0.019811	0.128725	0.410232	0.657056	0.0248947	0.0577508	0.314833	0.130665		0.361425	0.318458	0.0694932
24.8857	0.49132	0.548675	0.284498	0.534631	0.617781	0.491218	0.831731	-0.316687	0.477607	1.05297	-0.0673893	0.483739	0.483415	0.00213965	0.133105	0.417857	0.645031	0.021104	0.0703165	0.33331	0.118903		0.364537	0.314846	0.0687051
24.984	0.505134	0.578647	0.261138	0.53535	0.635361	0.52733	0.794739	-0.318421	0.478796	1.0335	-0.063655	0.487469	0.493737	0.0244142	0.13579	0.418631	0.633672	0.0198403	0.0799653	0.351019	0.111368		0.367801	0.31166	0.0680098
25.0823	0.520432	0.60871	0.239212	0.53374	0.658255	0.563124	0.756562	-0.316461	0.484483	1.02152	-0.0611487	0.491218	0.505712	0.0446386	0.141787	0.413485	0.625524	0.0214136	0.0887793	0.365943	0.101647		0.371837	0.310057	0.06766
25.1806	0.541405	0.629057	0.213365	0.525179	0.680477	0.59759	0.72176	-0.305875	0.487022	1.01529	-0.0574758	0.49069	0.514122	0.0574517	0.148821	0.40853	0.621931	0.0211399	0.0950737	0.377598	0.0881481		0.374824	0.309367	0.0675093
25.2789	0.559453	0.651539	0.187532	0.512993	0.700484	0.629082	0.68208	-0.290402	0.486823	1.00642	-0.0543519	0.493164	0.519175	0.0595826	0.160357	0.400344	0.619194	0.0216176	0.103046	0.387995	0.0740431		0.376675	0.308443	0.0673078
25.3772	0.573603	0.671498	0.163373	0.500255	0.716943	0.660989	0.643753	-0.269033	0.483924	0.996134	-0.0498898	0.498734	0.523674	0.0592073	0.169989	0.390368	0.616537	0.01709	0.113218	0.396339	0.0633917		0.3781	0.30733	0.0670648
25.4755	0.592079	0.679962	0.137535	0.491356	0.733302	0.687645	0.614073	-0.249016	0.482872	0.986139	-0.0416898	0.504305	0.527235	0.0592344	0.180365	0.382694	0.618585	0.0196588	0.126102	0.405445	0.0557774		0.38065	0.306186	0.0668152
25.5738	0.604025	0.688589	0.110211	0.486069	0.747781	0.717732	0.587555	-0.233252	0.482048	0.97511	-0.0323968	0.505303	0.531098	0.0601886	0.195594	0.371161	0.624677	0.0284121	0.140297	0.413286	0.0488023		0.383442	0.305424	0.066649
25.6721	0.612367	0.690803	0.0827307	0.475757	0.762271	0.759583	0.560942	-0.215778	0.481461	0.957426	-0.021377	0.508047	0.532989	0.0619198	0.208059	0.35498	0.631478	0.0393261	0.150063	0.418129	0.0465103		0.385604	0.304428	0.0664316
25.7704	0.617399	0.69855	0.0566439	0.470411	0.774771	0.800214	0.531495	-0.196286	0.481256	0.934188	-0.00728405	0.511517	0.540579	0.0674435	0.217267	0.341301	0.640703	0.0536271	0.160315	0.42053	0.042934		0.388456	0.30321	0.0661659
25.8687	0.622199	0.70884	0.0322064	0.463431	0.789938	0.835803	0.503243	-0.176744	0.482242	0.912308	0.000224994	0.51014	0.550525	0.0688305	0.224589	0.327443	0.653637	0.0642853	0.174657	0.42154	0.0392351		0.390885	0.303593	0.0662494
25.967	0.623696	0.723754	0.0103781	0.452744	0.80154	0.874974	0.47588	-0.144025	0.486279	0.893078	0.00473443	0.503748	0.565324	0.0677915	0.233544	0.312196	0.66859	0.0769524	0.188718	0.419375	0.0398631		0.394244	0.303879	0.0663119
26.0653	0.623969	0.736547	-0.00832298	0.436833	0.813932	0.916231	0.44945	-0.108362	0.493822	0.870733	0.0125041	0.499465	0.579265	0.0683605	0.23831	0.301692	0.686708	0.0885277	0.199828	0.410702	0.040951		0.397674	0.304474	0.0664417
26.1636	0.618051	0.747895	-0.0239471	0.421771	0.824028	0.968141	0.43169	-0.0687893	0.507747	0.847343	0.0183335	0.493409	0.591828	0.070394	0.240736	0.290181	0.706221	0.104607	0.208672	0.400468	0.0411353		0.401901	0.306086	0.0667934
26.2619	0.610449	0.76132	-0.0396797	0.406227	0.824388	1.01833	0.416132	-0.0272895	0.528786	0.820274	0.0278869	0.483672	0.602842	0.0698388	0.244859	0.276068	0.726241	0.120698	0.213433	0.388276	0.0422354		0.405475	0.307717	0.0671494
26.3602	0.598909	0.766977	-0.0537199	0.383798	0.827209	1.07561	0.398389	0.0111275	0.548309	0.794984	0.0382296	0.471172	0.611902	0.0630237	0.246426	0.264342	0.748839	0.132961	0.217254	0.375677	0.0435453		0.407855	0.3115	0.067975
26.4585	0.589979	0.767608	-0.0680973	0.358016	0.833096	1.13528	0.390236	0.0498338	0.563131	0.769502	0.0445153	0.455776	0.621568	0.0638211	0.250127	0.256272	0.768502	0.141783	0.223154	0.361638	0.0470901		0.410611	0.316097	0.0689781
26.5568	0.585302	0.768922	-0.080699	0.335216	0.843597	1.19183	0.383133	0.0853229	0.574706	0.738799	0.0482751	0.436018	0.630755	0.0674119	0.249921	0.242451	0.791729	0.15137	0.225261	0.343517	0.0548518		0.412747	0.321827	0.0702284
26.6551	0.576687	0.774427	-0.0972905	0.316979	0.849262	1.25052	0.388986	0.113411	0.584943	0.706521	0.0503748	0.418724	0.637531	0.0673755	0.250367	0.222136	0.815849	0.159344	0.224329	0.328339	0.0630004		0.414372	0.329573	0.0719187
26.7534	0.570957	0.774827	-0.111895	0.294426	0.848625	1.30775	0.39983	0.143864	0.597322	0.677325	0.0518964	0.402514	0.643465	0.0631544	0.246861	0.210072	0.830503	0.161637	0.225803	0.309415	0.0716658		0.415239	0.337124	0.0735665
26.8517	0.563734	0.776909	-0.124649	0.274393	0.845396	1.36296	0.415537	0.170654	0.60422	0.649527	0.0553782	0.386017	0.646247	0.0533352	0.243432	0.197749	0.839425	0.166132	0.225639	0.291028	0.0834478		0.415548	0.344533	0.0751833
26.95	0.551406	0.782072	-0.13608	0.252463	0.844197	1.41238	0.434013	0.191614	0.605674	0.631357	0.0607992	0.366154	0.649393	0.0424219	0.238987	0.185093	0.845991	0.167622	0.220912	0.275011	0.093582		0.415003	0.352463	0.0769137
27.0483	0.534133	0.780557	-0.144542	0.231092	0.844822	1.45874	0.458175	0.214997	0.605148	0.612813	0.0639795	0.345212	0.652158	0.0314729	0.231427	0.17893	0.849525	0.159455	0.219236	0.260836	0.100918		0.413766	0.360006	0.0785598
27.1466	0.519631	0.781297	-0.151107	0.209987	0.842032	1.50656	0.482629	0.225776	0.59616	0.583575	0.068214	0.326755	0.650638	0.0201734	0.216379	0.173931	0.845377	0.14008	0.218281	0.24987	0.110684		0.41033	0.367686	0.0802358
27.245	0.496735	0.78496	-0.157126	0.194584	0.839807	1.55533	0.505074	0.228778	0.594828	0.550709	0.0733992	0.309789	0.649344	0.0169416	0.199081	0.169974	0.837957	0.123399	0.218185	0.241744	0.123677		0.407484	0.375307	0.0818988
27.3433	0.479891	0.783473	-0.160683	0.182852	0.840623	1.61392	0.526853	0.224617	0.589727	0.524365	0.0798948	0.289243	0.64925	0.0217824	0.176989	0.169289	0.83281	0.11107	0.216362	0.233581	0.137364		0.40587	0.384482	0.0839009
27.4416	0.464323	0.783051	-0.162568	0.172477	0.842882	1.67884	0.54724	0.215856	0.587755	0.495576	0.081183	0.263075	0.646089	0.0250016	0.158584	0.171314	0.823999	0.102138	0.212971	0.226239	0.148687		0.404034	0.395168	0.0862327
27.5399	0.445265	0.787543	-0.160396	0.16316	0.844447	1.74726	0.566909	0.207922	0.580255	0.46764	0.0764914	0.237258	0.638825	0.0291378	0.137115	0.173911	0.810229	0.0893061	0.209996	0.220441	0.157437		0.401436	0.406773	0.0887651
27.6382	0.431527	0.788617	-0.159925	0.150405	0.84586	1.8049	0.582784	0.198828	0.568121	0.438159	0.068968	0.211318	0.634129	0.0336208	0.111382	0.181455	0.800634	0.0730533	0.20582	0.21574	0.165285		0.397651	0.417663	0.0911414
27.7365	0.42213	0.793714	-0.162242	0.144471	0.846287	1.85081	0.601505	0.187512	0.549437	0.413691	0.0569925	0.183627	0.629243	0.0361935	0.0899263	0.187197	0.79226	0.0528797	0.204503	0.212975	0.169743		0.393469	0.427601	0.0933103
27.8348	0.412734	0.791876	-0.163412	0.14314	0.856279	1.896	0.630347	0.172014	0.528237	0.397051	0.0465462	0.157777	0.617507	0.0349648	0.0689392	0.186207	0.781962	0.0283273	0.201802	0.209319	0.175703		0.389206	0.43817	0.0956165
27.9331	0.403633	0.784002	-0.163107	0.14119	0.862044	1.93733	0.660891	0.155939	0.504261	0.381682	0.0368941	0.134676	0.603375	0.0381427	0.0475594	0.186721	0.770438	0.00799616	0.195382	0.207642	0.181977		0.384698	0.447419	0.0976349
28.0314	0.394171	0.770972	-0.158284	0.138255	0.863822	1.97707	0.694397	0.132511	0.477126	0.369714	0.0231961	0.114626	0.585355	0.0390601	0.0285324	0.193398	0.755415	-0.0115198	0.191345	0.207571	0.188687		0.379782	0.455978	0.0995025
28.1297	0.385353	0.756976	-0.152502	0.140857	0.862311	2.01052	0.727234	0.104093	0.451677	0.364113	0.00512414	0.0936723	0.567673	0.0367081	0.0127869	0.197974	0.736173	-0.0326494	0.189611	0.210441	0.196391		0.374502	0.463679	0.101183
28.228	0.379158	0.741846	-0.153598	0.141277	0.856768	2.02988	0.757277	0.0750625	0.421117	0.358636	-0.0132537	0.0730891	0.547568	0.0326663	-0.0015543	0.207175	0.716804	-0.0565761	0.187712	0.214353	0.203663		0.367575	0.469491	0.102451
28.3263	0.374773	0.723927	-0.155075	0.142884	0.859466	2.04211	0.785658	0.0402681	0.386646	0.356613	-0.0367791	0.054357	0.528306	0.0312347	-0.0157068	0.220259	0.69845	-0.0801388	0.188187	0.220287	0.210497		0.360772	0.474882	0.103628
28.4246	0.373592	0.709625	-0.15015	0.149222	0.857068	2.03938	0.818124	0.0037591	0.352666	0.354932	-0.0626726	0.0367201	0.512951	0.0317408	-0.0279916	0.23209	0.678829	-0.104799	0.188699	0.224756	0.21519		0.353987	0.477998	0.104308
28.5229	0.372615	0.696018	-0.143909	0.160216	0.845679	2.02956	0.847931	-0.0301571	0.321526	0.357886	-0.0871919	0.0206261	0.497123	0.0227711	-0.0433421	0.245137	0.654938	-0.12801	0.188184	0.228393	0.216876		0.346327	0.479787	0.104698
28.6212	0.368386	0.681642	-0.133328	0.169169	0.824941	2.017	0.882668	-0.0572245	0.292265	0.3629	-0.113039	0.0101805	0.480413	0.0110681	-0.0547213	0.265151	0.621674	-0.151224	0.188293	0.234847	0.216558		0.338934	0.480406	0.104833
28.7195	0.36615	0.664034	-0.116404	0.176472	0.804224	1.99337	0.91334	-0.0784902	0.270666	0.36847	-0.137015	0.000949896	0.464725	0.000487558	-0.0633159	0.290041	0.583114	-0.171131	0.191324	0.237374	0.219222		0.332267	0.478297	0.104373
28.8178	0.363762	0.648963	-0.0991867	0.19039	0.790265	1.96575	0.93897	-0.0955015	0.251281	0.372335	-0.159045	-0.00789655	0.444772	-0.0068605	-0.0648674	0.310765	0.554506	-0.188264	0.192464	0.244244	0.220589		0.32702	0.47546	0.103754
28.9161	0.36577	0.630135	-0.0834787	0.203407	0.779196	1.93683	0.961692	-0.102198	0.234963	0.373158	-0.187863	-0.0112451	0.423584	-0.0103779	-0.0632671	0.335096	0.525213	-0.209387	0.194865	0.249704	0.216204		0.322	0.472484	0.103104
29.0144	0.369483	0.606569	-0.0683051	0.222451	0.766335	1.9058	0.983153	-0.104247	0.226683	0.370557	-0.222952	-0.00923092	0.399795	-0.0105579	-0.0594195	0.357224	0.494988	-0.230858	0.198783	0.253842	0.210324		0.317162	0.468992	0.102342
29.1127	0.37444	0.582078	-0.0542627	0.240717	0.750341	1.87197	1.00056	-0.109584	0.220414	0.371846	-0.256772	-0.00380383	0.37698	-0.00438228	-0.0543494	0.377048	0.469014	-0.245873	0.198869	0.257896	0.204738		0.312756	0.464688	0.101403
29.211	0.377113	0.553582	-0.044221	0.261384	0.73186	1.82835	1.01676	-0.10346	0.223861	0.38497	-0.291486	-0.000104777	0.353288	0.00129799	-0.0462408	0.401164	0.446771	-0.2534	0.196559	0.261908	0.199505		0.309498	0.458381	0.100027
29.3093	0.384353	0.525843	-0.0328135	0.275644	0.708471	1.78052	1.03403	-0.0982579	0.226647	0.40184	-0.331523	0.00239188	0.330815	0.00622841	-0.0355605	0.425197	0.430191	-0.257349	0.196106	0.265711	0.190911		0.306162	0.452243	0.0986875
29.4076	0.385184	0.497638	-0.0241683	0.284944	0.684923	1.72557	1.05785	-0.0929048	0.233818	0.415356	-0.369526	0.00574709	0.306769	0.0118622	-0.0222496	0.450787	0.414573	-0.260983	0.195122	0.268433	0.180389		0.30234	0.445985	0.0973219
29.5059	0.389342	0.465711	-0.0196098	0.29316	0.662167	1.66064	1.08222	-0.0905784	0.241253	0.433022	-0.396876	0.0122945	0.286033	0.0219124	-0.0126136	0.47795	0.40718	-0.266702	0.193989	0.269792	0.172135		0.299163	0.43873	0.0957387
29.6042	0.395688	0.437556	-0.013427	0.29974	0.639898	1.5911	1.1003	-0.0905006	0.253401	0.44818	-0.418891	0.0183646	0.267356	0.0288077	-0.00240347	0.502506	0.403887	-0.272699	0.19032	0.268376	0.164397		0.295807	0.430885	0.0940268
29.7026	0.401279	0.41425	-0.00172637	0.306319	0.61759	1.53606	1.11944	-0.0856177	0.267851	0.463818	-0.436602	0.0252508	0.243547	0.0365081	0.0118387	0.522617	0.396792	-0.27844	0.18979	0.268073	0.157688		0.294111	0.424886	0.0927176
29.8009	0.402126	0.388263	0.0137065	0.30739	0.591974	1.48906	1.13593	-0.0809716	0.28806	0.479519	-0.448707	0.0325996	0.217729	0.0464324	0.0231427	0.551912	0.388057	-0.280058	0.190327	0.267453	0.154111		0.293241	0.419552	0.0915538
29.8992	0.407969	0.36406	0.0295271	0.299202	0.55751	1.4488	1.14355	-0.0774549	0.314045	0.48941	-0.463362	0.0365158	0.192297	0.0541165	0.0329562	0.583222	0.380882	-0.275713	0.190889	0.266993	0.150255		0.291698	0.414774	0.090511
29.9975	0.415066	0.341172	0.0448426	0.289612	0.526133	1.41752	1.14777	-0.0701433	0.337802	0.495249	-0.473271	0.0390333	0.165469	0.0563734	0.0452563	0.612789	0.376421	-0.2775	0.188238	0.263855	0.146119		0.289896	0.411521	0.0898012
30.0958	0.429275	0.318079	0.0542781	0.279555	0.501636	1.38419	1.1468	-0.0599062	0.360731	0.4969	-0.47566	0.040237	0.139871	0.0603181	0.0570361	0.637245	0.377537	-0.280689	0.182799	0.262831	0.142222		0.288347	0.407571	0.0889392
30.1941	0.444703	0.302984	0.0654541	0.263298	0.48428	1.35402	1.14597	-0.0452442	0.377681	0.489853	-0.474759	0.0444919	0.114492	0.0641554	0.0640122	0.660466	0.386033	-0.280915	0.175503	0.263944	0.13634		0.287465	0.403881	0.088134
30.2924	0.459965	0.289277	0.0822229	0.250749	0.475179	1.32864	1.14489	-0.0348623	0.39638	0.485839	-0.47009	0.0479449	0.0931174	0.069667	0.0699426	0.684583	0.395321	-0.276411	0.170017	0.263462	0.129834		0.288365	0.400777	0.0874568
30.3907	0.47627	0.27851	0.104924	0.240952	0.465815	1.30969	1.14487	-0.017867	0.416582	0.479295	-0.464229	0.0493988	0.0723263	0.0707793	0.0747089	0.707395	0.400879	-0.273448	0.165441	0.262323	0.123112		0.289891	0.398584	0.0869782
30.489	0.491466	0.275301	0.123029	0.233523	0.465065	1.3037	1.14674	0.00137815	0.437015	0.472088	-0.44825	0.051566	0.0499617	0.0736419	0.0785833	0.732008	0.404485	-0.269069	0.161662	0.262011	0.118293		0.293533	0.397654	0.0867751
30.5873	0.502943	0.278429	0.139424	0.224161	0.471706	1.30316	1.14821	0.0143337	0.456317	0.463207	-0.426628	0.051953	0.0302834	0.0837316	0.085542	0.754166	0.409617	-0.264585	0.158312	0.261913	0.115164		0.29816	0.396942	0.0866199
30.6856	0.514907	0.280828	0.152663	0.218572	0.481291	1.31281	1.14342	0.0251433	0.47659	0.454441	-0.402666	0.0468075	0.0143078	0.0953599	0.0881638	0.775071	0.421034	-0.257425	0.155165	0.261236	0.111285		0.303286	0.39705	0.0866435
30.7839	0.528009	0.283102	0.161144	0.212039	0.496062	1.33417	1.13629	0.0356635	0.490839	0.44487	-0.381183	0.0379722	0.00249488	0.107469	0.0890111	0.794715	0.438901	-0.251761	0.151688	0.262871	0.102157		0.308406	0.399176	0.0871073
30.8822	0.546889	0.285485	0.167935	0.202505	0.50702	1.36214	1.13406	0.0389591	0.499295	0.432289	-0.363378	0.0270728	-0.00053908	0.116143	0.087167	0.815641	0.454959	-0.244872	0.14957	0.261975	0.0935644		0.313042	0.403203	0.087986
30.9805	0.562998	0.290438	0.182028	0.193535	0.518354	1.39586	1.12973	0.0316874	0.505448	0.421716	-0.336976	0.00735319	0.00218316	0.118306	0.0837854	0.835622	0.473534	-0.232598	0.144801	0.263358	0.0880941		0.31806	0.407347	0.0888903
31.0788	0.578869	0.297385	0.196796	0.183082	0.529708	1.43645	1.12494	0.0212269	0.505889	0.414708	-0.308144	-0.0141309	0.00729468	0.116626	0.0794607	0.861067	0.492077	-0.216101	0.139308	0.264016	0.0847946		0.323587	0.412682	0.0900546
31.1771	0.590575	0.305307	0.211435	0.175503	0.549191	1.47996	1.12293	0.0126934	0.505885	0.407708	-0.285292	-0.036138	0.0117237	0.105137	0.079754	0.885448	0.507762	-0.195744	0.134914	0.263448	0.0808501		0.329193	0.419267	0.0914915
31.2754	0.600078	0.316121	0.232777	0.166258	0.573804	1.53429	1.12175	0.0016627	0.50393	0.393669	-0.263308	-0.0600538	0.0211684	0.096586	0.0841123	0.906464	0.522225	-0.173303	0.132665	0.261665	0.0747225		0.335585	0.427246	0.0932326
31.3737	0.611834	0.33154	0.255282	0.164518	0.605978	1.59036	1.11575	-0.00476431	0.50186	0.378648	-0.236742	-0.0820653	0.0311574	0.0859006	0.0856817	0.925291	0.532884	-0.153248	0.129262	0.257474	0.0702396		0.342707	0.435164	0.0949607
31.472	0.628268	0.353201	0.280745	0.164154	0.638214	1.6456	1.10235	-0.00526975	0.500817	0.363637	-0.215511	-0.104308	0.042198	0.0735582	0.0826063	0.941018	0.538498	-0.135204	0.127702	0.256949	0.0696099		0.349944	0.442903	0.0966493
31.5703	0.639673	0.378143	0.308243	0.171013	0.672939	1.70659	1.08877	-0.001289	0.500873	0.346028	-0.204922	-0.129247	0.0535993	0.0578845	0.0766775	0.95465	0.533493	-0.116577	0.128399	0.258055	0.0679151		0.35671	0.452175	0.0986728
31.6686	0.649898	0.394794	0.332799	0.181007	0.709652	1.76573	1.07929	0.00432725	0.500263	0.332163	-0.192174	-0.153455	0.0666166	0.0415506	0.0730714	0.965408	0.526001	-0.0929617	0.131939	0.261497	0.0653842		0.363943	0.461182	0.100638
31.7669	0.659758	0.406413	0.349211	0.191968	0.747526	1.8138	1.07259	0.0100483	0.498701	0.323621	-0.181011	-0.174427	0.0847047	0.0211023	0.0694058	0.974713	0.517442	-0.0666508	0.133714	0.26198	0.0631756		0.370371	0.469022	0.102349
31.8652	0.674123	0.423077	0.362779	0.209355	0.786734	1.85703	1.06737	0.020316	0.496633	0.316194	-0.168917	-0.195006	0.105337	-0.00119183	0.0682567	0.975527	0.509521	-0.0426496	0.13316	0.263477	0.0573825		0.377072	0.47623	0.103922
31.9635	0.687586	0.441418	0.373894	0.234884	0.829166	1.89263	1.06435	0.0339778	0.491608	0.314349	-0.150944	-0.213685	0.131415	-0.0194209	0.0721397	0.979979	0.504087	-0.0225773	0.133534	0.267468	0.04917		0.385477	0.482269	0.10524
32.0618	0.701344	0.464226	0.383931	0.263241	0.871312	1.92124	1.0627	0.0413909	0.492225	0.320141	-0.133924	-0.232694	0.159039	-0.0342417	0.0761902	0.986354	0.492066	0.00159044	0.138315	0.271966	0.0398498		0.394584	0.487691	0.106423
32.1602	0.70867	0.490554	0.392706	0.294726	0.907922	1.95173	1.06478	0.0438822	0.494214	0.330412	-0.119068	-0.251906	0.186946	-0.0449868	0.0798735	0.990613	0.476605	0.0264074	0.141431	0.273919	0.0298773		0.4033	0.493627	0.107718
32.2585	0.712184	0.50636	0.39913	0.331765	0.940087	1.97891	1.06823	0.0435048	0.499052	0.347921	-0.106025	-0.271413	0.214975	-0.054163	0.0924364	0.992621	0.452909	0.0470002	0.144456	0.274483	0.0246084		0.411382	0.498762	0.108839
32.3568	0.716903	0.520581	0.404487	0.369794	0.968166	2.00215	1.07633	0.0479706	0.505256	0.364947	-0.0945723	-0.286769	0.239108	-0.0641971	0.110078	0.9904	0.427025	0.0612495	0.146333	0.279185	0.0232237		0.419412	0.503226	0.109813
32.4551	0.718001	0.531715	0.407004	0.404505	0.99703	2.02301	1.08875	0.0496146	0.514147	0.383131	-0.0815002	-0.297713	0.266398	-0.0647156	0.133652	0.985387	0.404636	0.0752288	0.147545	0.284218	0.0228763		0.428235	0.506802	0.110593
32.5534	0.713321	0.534277	0.407578	0.433843	1.02245	2.03861	1.09524	0.0549045	0.525251	0.400306	-0.0780223	-0.306919	0.292752	-0.0640071	0.161196	0.974132	0.387287	0.0920772	0.149298	0.28947	0.0228619		0.435519	0.508757	0.11102
32.6517	0.708294	0.529435	0.405737	0.461247	1.05086	2.05122	1.09803	0.0701509	0.541092	0.41856	-0.0787168	-0.312384	0.317539	-0.0630167	0.191576	0.964717	0.373486	0.108293	0.151205	0.294831	0.0228448		0.443095	0.510099	0.111313
32.75	0.702037	0.522017	0.399603	0.485735	1.08024	2.05775	1.10522	0.0810127	0.557299	0.439345	-0.0798785	-0.3152	0.340047	-0.0634879	0.230544	0.95307	0.362592	0.123233	0.153354	0.30001	0.0220404		0.450314	0.510977	0.111504
32.8483	0.696685	0.511855	0.396056	0.50861	1.10112	2.05588	1.11568	0.0902746	0.574454	0.463441	-0.0793002	-0.313376	0.360714	-0.0627388	0.267349	0.937907	0.351297	0.136342	0.154759	0.304405	0.0245003		0.456948	0.510076	0.111308
32.9466	0.68371	0.501254	0.393479	0.530572	1.12141	2.04758	1.12133	0.104359	0.596105	0.493009	-0.0739179	-0.308167	0.377455	-0.0552198	0.302139	0.920343	0.337258	0.14842	0.153898	0.310886	0.0289048		0.463563	0.507111	0.110661
33.0449	0.671572	0.490865	0.380684	0.554142	1.14359	2.03044	1.13074	0.121312	0.624301	0.52091	-0.0746387	-0.296945	0.391313	-0.0391662	0.339019	0.898941	0.321995	0.158454	0.155899	0.315482	0.0341905		0.470148	0.502956	0.109754
33.1432	0.660963	0.481217	0.368729	0.57527	1.16232	2.00147	1.13755	0.140042	0.654083	0.542913	-0.0748398	-0.286569	0.404769	-0.0212277	0.377477	0.869943	0.309547	0.166995	0.159453	0.320227	0.0384292		0.475656	0.496736	0.108397
33.2415	0.652416	0.474651	0.357027	0.591757	1.17349	1.97023	1.13861	0.161552	0.67991	0.556471	-0.065199	-0.2793	0.419212	0.00440755	0.415275	0.840561	0.301893	0.168269	0.162937	0.326264	0.0447341		0.480722	0.488946	0.106697
33.3398	0.648692	0.467243	0.339649	0.608018	1.17894	1.93148	1.13919	0.185813	0.704835	0.569156	-0.0575074	-0.26762	0.428799	0.0299097	0.449396	0.809585	0.29182	0.164446	0.165703	0.332707	0.0538434		0.48448	0.480022	0.104749
33.4381	0.641287	0.454455	0.323574	0.619558	1.1804	1.88865	1.14621	0.20405	0.722794	0.576229	-0.0532473	-0.25643	0.439965	0.0553785	0.485119	0.77809	0.284867	0.158932	0.168489	0.339738	0.0633374		0.486736	0.471152	0.102814
33.5364	0.630292	0.436568	0.305372	0.632623	1.17991	1.84792	1.15867	0.218947	0.737273	0.578203	-0.0461698	-0.242785	0.451571	0.0758666	0.524093	0.744168	0.282225	0.15579	0.168942	0.339995	0.0707064		0.488104	0.463206	0.10108
33.6347	0.623834	0.419928	0.287352	0.636473	1.17668	1.80127	1.16969	0.233408	0.748185	0.579454	-0.0356261	-0.225369	0.459763	0.0957822	0.567828	0.709304	0.28619	0.156897	0.167021	0.338164	0.0781651		0.489257	0.453911	0.0990516
33.733	0.619803	0.409863	0.269428	0.633224	1.173	1.75707	1.18055	0.243461	0.757048	0.577777	-0.0326795	-0.208557	0.468104	0.122602	0.610008	0.677044	0.294284	0.154943	0.163037	0.334261	0.088735		0.490143	0.445604	0.0972387
33.8313	0.615445	0.403321	0.257187	0.626935	1.16846	1.71688	1.18365	0.248465	0.763123	0.566328	-0.0281658	-0.195149	0.472247	0.151515	0.646362	0.649914	0.305163	0.148929	0.157834	0.331149	0.0984093		0.489905	0.437737	0.0955221
33.9296	0.611889	0.393519	0.246593	0.614283	1.16439	1.67662	1.18596	0.249064	0.768827	0.554172	-0.0274341	-0.184307	0.475313	0.183443	0.677435	0.62652	0.315376	0.140195	0.156482	0.327027	0.111473		0.488897	0.43041	0.0939231
34.0279	0.60493	0.37955	0.236241	0.596023	1.16053	1.63596	1.18945	0.243518	0.771077	0.537022	-0.033476	-0.17243	0.474292	0.217518	0.702962	0.596841	0.321889	0.135743	0.156014	0.321791	0.126084		0.485787	0.423412	0.0923961
34.1262	0.596097	0.362812	0.226401	0.578513	1.14882	1.59523	1.18709	0.244811	0.771672	0.516295	-0.0410198	-0.157281	0.474547	0.254427	0.726076	0.564223	0.332794	0.133969	0.154686	0.31567	0.141103		0.482235	0.415137	0.0905903
34.2245	0.592474	0.345837	0.219162	0.560436	1.13952	1.55113	1.18524	0.253161	0.775094	0.496158	-0.0463052	-0.138133	0.473333	0.288061	0.74271	0.539108	0.342739	0.131134	0.153447	0.310121	0.152845		0.479394	0.406797	0.0887703
34.3228	0.59139	0.331114	0.211144	0.539777	1.12646	1.51254	1.18166	0.25983	0.778947	0.473699	-0.0516659	-0.118303	0.471808	0.318217	0.750659	0.523473	0.359559	0.133512	0.154422	0.303065	0.159275		0.476695	0.398881	0.0870429
34.4211	0.58953	0.321135	0.201542	0.511271	1.11213	1.47747	1.1705	0.266605	0.775905	0.44597	-0.0600869	-0.103976	0.472135	0.347425	0.753973	0.511493	0.379457	0.140177	0.155542	0.292704	0.160937		0.472468	0.391231	0.0853735
34.5194	0.596624	0.312949	0.189429	0.482781	1.09613	1.4415	1.15586	0.271345	0.768351	0.417729	-0.0663778	-0.0929408	0.466868	0.367316	0.747362	0.502825	0.393227	0.150085	0.155666	0.280524	0.15854		0.466467	0.383587	0.0837056
34.6178	0.615054	0.308752	0.177713	0.457492	1.07406	1.40409	1.13896	0.270617	0.757525	0.389029	-0.0704707	-0.0838245	0.462047	0.381297	0.730593	0.498689	0.405291	0.158404	0.155186	0.268526	0.153157		0.459628	0.375508	0.0819427
34.7161	0.640539	0.309554	0.171534	0.433844	1.04156	1.36956	1.12676	0.263191	0.739817	0.358482	-0.0729359	-0.0781504	0.457623	0.391134	0.704816	0.491735	0.41433	0.169429	0.154996	0.256842	0.145077		0.451892	0.367389	0.0801708
34.8144	0.670994	0.320061	0.171109	0.410581	1.00749	1.32985	1.11702	0.259822	0.718582	0.328494	-0.0754425	-0.0728815	0.448941	0.401657	0.673183	0.485445	0.417333	0.178652	0.155664	0.246299	0.137662		0.44431	0.358606	0.0782542
34.9127	0.698715	0.33907	0.169262	0.391244	0.981238	1.29247	1.10195	0.257271	0.699166	0.300287	-0.0798393	-0.0686304	0.436877	0.411452	0.642904	0.483219	0.417284	0.19016	0.155497	0.236617	0.129842		0.437431	0.350835	0.0765585
35.011	0.732017	0.363455	0.167603	0.369281	0.960575	1.25667	1.08488	0.248617	0.677045	0.271138	-0.0870132	-0.0627659	0.422914	0.415289	0.613604	0.4842	0.423228	0.203532	0.15774	0.223775	0.120325		0.430767	0.344482	0.0751722
35.1093	0.767703	0.390295	0.169866	0.344274	0.931663	1.22807	1.06486	0.242311	0.646732	0.245154	-0.0946629	-0.0583725	0.406345	0.412044	0.578081	0.487424	0.431437	0.214783	0.160224	0.211398	0.110611		0.423345	0.338518	0.0738708
35.2076	0.798571	0.414654	0.176342	0.31838	0.903178	1.21205	1.04699	0.234986	0.617163	0.223277	-0.101189	-0.0541841	0.385519	0.411336	0.538999	0.495366	0.440865	0.22765	0.162303	0.197568	0.0986326		0.416593	0.334715	0.0730407
35.3059	0.831237	0.435723	0.180073	0.293976	0.878877	1.19797	1.03619	0.224569	0.592097	0.209244	-0.113727	-0.0456887	0.362248	0.405288	0.493645	0.505322	0.4495	0.248022	0.16553	0.18218	0.084669		0.410331	0.33315	0.0726993
35.4042	0.859064	0.454942	0.184771	0.269513	0.860017	1.18596	1.02884	0.208843	0.569413	0.200565	-0.119874	-0.0391799	0.343363	0.397288	0.447001	0.520226	0.463924	0.273092	0.169785	0.167482	0.0683327		0.405399	0.332852	0.0726342
35.5025	0.887625	0.470888	0.185967	0.246252	0.839914	1.18293	1.01936	0.194153	0.552923	0.197135	-0.118628	-0.0319586	0.320759	0.390463	0.397849	0.541494	0.472983	0.302939	0.172893	0.154067	0.0517087		0.40151	0.333759	0.0728321
35.6008	0.915642	0.490413	0.185625	0.223084	0.821867	1.17904	1.01051	0.177586	0.538264	0.203636	-0.11413	-0.0265716	0.299532	0.391447	0.348038	0.566768	0.481968	0.329785	0.177884	0.145838	0.0362875		0.399167	0.335295	0.0731674
35.6991	0.941194	0.507868	0.185253	0.205235	0.805011	1.17813	1.00324	0.15985	0.52042	0.211878	-0.1086	-0.0218912	0.279631	0.392688	0.297592	0.594752	0.4932	0.349669	0.184272	0.140506	0.0214511		0.397207	0.33788	0.0737314
35.7974	0.965524	0.523275	0.186373	0.194386	0.785225	1.1777	0.992156	0.146996	0.50405	0.219242	-0.0980004	-0.0171334	0.255963	0.385908	0.246987	0.624251	0.502158	0.368076	0.189152	0.137978	0.00183594		0.394862	0.340414	0.0742843
35.8957	0.987243	0.536569	0.185672	0.19019	0.76527	1.17705	0.990302	0.139687	0.493514	0.234175	-0.0880887	-0.0109574	0.236485	0.381143	0.198586	0.651948	0.511227	0.38894	0.196449	0.136965	-0.0205774		0.394371	0.343701	0.0750016
35.994	1.00116	0.549211	0.184197	0.189648	0.744686	1.17801	0.987387	0.13467	0.482905	0.246288	-0.0779882	-0.0014513	0.21879	0.380402	0.155703	0.679826	0.526259	0.414017	0.20039	0.134808	-0.04728		0.394364	0.347168	0.0757584
36.0923	1.01511	0.567342	0.18475	0.194476	0.718303	1.18058	0.980209	0.136318	0.47257	0.261082	-0.0649071	0.00608336	0.202016	0.371747	0.117321	0.708938	0.546285	0.433776	0.202193	0.131482	-0.0728286		0.394897	0.350492	0.0764836
36.1906	1.02914	0.583808	0.185082	0.197608	0.705148	1.1852	0.979321	0.133776	0.459003	0.27374	-0.0503337	0.0130748	0.185539	0.356275	0.0780156	0.743518	0.567758	0.448438	0.20544	0.129742	-0.0967402		0.395836	0.356049	0.0776962
36.2889	1.03923	0.59528	0.184121	0.201308	0.687952	1.1934	0.973425	0.131682	0.443631	0.282247	-0.0425967	0.0155631	0.170955	0.34314	0.046749	0.773439	0.590867	0.462336	0.212036	0.126637	-0.117448		0.395903	0.361427	0.0788698
36.3872	1.05033	0.607888	0.183598	0.206616	0.677052	1.19615	0.965853	0.135841	0.431132	0.288098	-0.0358077	0.0150643	0.156003	0.332438	0.0173868	0.793468	0.608858	0.472286	0.217777	0.124476	-0.136158		0.395636	0.365988	0.0798651
36.4855	1.05821	0.616256	0.186277	0.21757	0.668112	1.19798	0.961136	0.132255	0.427626	0.299101	-0.0249883	0.0193857	0.142044	0.325303	-0.0161018	0.80833	0.627696	0.481987	0.223031	0.124064	-0.151248		0.396382	0.369829	0.0807032
36.5838	1.05586	0.627176	0.18976	0.228921	0.654498	1.20383	0.955416	0.130767	0.426094	0.312256	-0.0207989	0.023276	0.131914	0.322931	-0.0447895	0.825016	0.655867	0.490096	0.228147	0.128155	-0.162977		0.398163	0.373189	0.0814365
36.6821	1.04675	0.634674	0.198717	0.239488	0.647352	1.21557	0.959904	0.12825	0.424325	0.3261	-0.0166282	0.0270704	0.123551	0.322667	-0.0652841	0.84377	0.678134	0.495773	0.233452	0.132589	-0.171722		0.401167	0.376732	0.0822096
36.7804	1.03002	0.638952	0.203498	0.249076	0.649661	1.22338	0.965226	0.125144	0.428466	0.34358	-0.010511	0.0312465	0.114511	0.32416	-0.0821612	0.865295	0.702804	0.499502	0.236409	0.135983	-0.177594		0.404602	0.379641	0.0828445
36.8787	1.00703	0.634727	0.201466	0.259095	0.65496	1.23385	0.961399	0.119393	0.43641	0.359399	-0.00545696	0.0370339	0.111664	0.326012	-0.100394	0.884319	0.730811	0.505533	0.239958	0.138245	-0.180689		0.40737	0.381758	0.0833063
36.977	0.987518	0.622548	0.196381	0.268661	0.658695	1.24961	0.959142	0.111999	0.4371	0.366002	-0.00193834	0.0420747	0.111744	0.32716	-0.117468	0.901871	0.757892	0.51063	0.246515	0.142271	-0.184672		0.409226	0.38473	0.0839551
37.0754	0.964407	0.605153	0.19007	0.285057	0.656148	1.26884	0.965563	0.113162	0.4412	0.371819	0.00174309	0.0420364	0.114157	0.331164	-0.136124	0.914731	0.778254	0.51419	0.252917	0.148295	-0.190178		0.411076	0.387633	0.0845885
37.1737	0.93596	0.58422	0.18268	0.303751	0.656724	1.28206	0.977918	0.112073	0.448491	0.378853	0.00804729	0.0420029	0.120481	0.337105	-0.150276	0.928261	0.800449	0.519503	0.257614	0.154926	-0.197614		0.413487	0.390076	0.0851215
37.272	0.91198	0.566873	0.167474	0.328941	0.654853	1.2927	0.994488	0.111223	0.453328	0.382926	0.0105361	0.0434327	0.132987	0.338249	-0.161404	0.938366	0.820647	0.520088	0.260955	0.165364	-0.200194		0.415896	0.392217	0.0855888
37.3703	0.88106	0.553009	0.15733	0.355219	0.649981	1.30485	1.0091	0.108233	0.454785	0.383848	0.0122293	0.0423818	0.147237	0.343133	-0.167856	0.94855	0.837818	0.515649	0.262701	0.174519	-0.2014		0.417732	0.393697	0.0859117
37.4686	0.848531	0.54336	0.149321	0.382769	0.643893	1.31563	1.01981	0.104806	0.448981	0.380094	0.00889471	0.0406041	0.158639	0.347857	-0.17106	0.954924	0.857392	0.506751	0.261095	0.182744	-0.200535		0.418309	0.394889	0.0861718
37.5669	0.809495	0.542376	0.140643	0.407938	0.637598	1.3233	1.02802	0.107801	0.441757	0.373059	-0.00301423	0.0371716	0.173718	0.35001	-0.170343	0.954033	0.881318	0.497165	0.259041	0.191288	-0.199435		0.418235	0.395412	0.0862861
37.6652	0.769454	0.538188	0.13637	0.430555	0.62707	1.33036	1.03036	0.118267	0.434458	0.36082	-0.017072	0.0350343	0.188274	0.346567	-0.168125	0.956646	0.902148	0.491915	0.257289	0.198665	-0.200626		0.417458	0.395565	0.0863193
37.7635	0.729169	0.533415	0.130781	0.45253	0.6146	1.3373	1.03425	0.125911	0.433623	0.350767	-0.0319764	0.0317693	0.206823	0.344651	-0.166993	0.960386	0.916848	0.489626	0.254301	0.201694	-0.202573		0.416519	0.396298	0.0864794
37.8618	0.68702	0.529222	0.120434	0.471601	0.602553	1.34203	1.04243	0.130553	0.432973	0.346642	-0.0507737	0.031232	0.229581	0.346302	-0.164358	0.962873	0.930562	0.48988	0.25444	0.201834	-0.201989		0.415955	0.397228	0.0866822
37.9601	0.64623	0.528173	0.112814	0.484963	0.595842	1.34544	1.04486	0.13198	0.431051	0.341229	-0.0726967	0.0314154	0.249537	0.343058	-0.159149	0.967606	0.94337	0.490106	0.253397	0.202359	-0.197679		0.414948	0.398062	0.0868642
38.0584	0.609505	0.528985	0.105782	0.493228	0.593428	1.34915	1.04997	0.129056	0.430133	0.338976	-0.0910604	0.031017	0.266775	0.334316	-0.158591	0.973493	0.947371	0.490429	0.252956	0.20474	-0.189689		0.413808	0.399173	0.0871068
38.1567	0.569619	0.526958	0.0951466	0.494474	0.594164	1.35144	1.05902	0.12382	0.435129	0.334477	-0.107327	0.0332045	0.285162	0.330453	-0.158851	0.98676	0.940405	0.495698	0.254129	0.206213	-0.182203		0.412757	0.400471	0.0873899
38.255	0.530345	0.527126	0.0829915	0.493471	0.589115	1.35303	1.06788	0.117574	0.445925	0.33443	-0.126123	0.0309033	0.300626	0.328126	-0.157481	0.994484	0.931843	0.50475	0.253568	0.20721	-0.176116		0.411127	0.40194	0.0877105
38.3533	0.48818	0.534137	0.0715176	0.485354	0.591692	1.35085	1.0803	0.108245	0.455319	0.337645	-0.138379	0.0330606	0.315704	0.322483	-0.158597	1.0002	0.920934	0.51681	0.251393	0.210857	-0.168262		0.409974	0.402982	0.0879379
38.4516	0.440419	0.543974	0.0613337	0.473722	0.591097	1.35354	1.10017	0.0962469	0.45989	0.344451	-0.143272	0.0374652	0.332017	0.318234	-0.153977	1.00971	0.912149	0.529666	0.24875	0.21632	-0.15823		0.410175	0.404682	0.0883089
38.5499	0.396087	0.553947	0.0489393	0.462715	0.59004	1.35622	1.122	0.0917547	0.459609	0.348223	-0.147373	0.040994	0.348306	0.310369	-0.140985	1.02106	0.894817	0.544517	0.247294	0.218537	-0.148441		0.410411	0.406025	0.088602
38.6482	0.355967	0.560026	0.0366067	0.449437	0.59428	1.35555	1.14291	0.0886773	0.459568	0.349109	-0.147072	0.0464441	0.363115	0.304332	-0.122529	1.02832	0.86768	0.561263	0.248748	0.21793	-0.136161		0.410676	0.405691	0.0885291
38.7465	0.309585	0.569256	0.0165754	0.434577	0.593441	1.34708	1.15763	0.0909091	0.463604	0.352988	-0.146224	0.0524608	0.375225	0.301089	-0.102868	1.03355	0.84532	0.581065	0.249926	0.217486	-0.123566		0.410434	0.404603	0.0882917
38.8448	0.260638	0.58258	-0.000728554	0.423931	0.587234	1.33975	1.16719	0.0911552	0.461413	0.349895	-0.150455	0.0607288	0.387135	0.299138	-0.0765044	1.03568	0.821704	0.60388	0.254632	0.218874	-0.110222		0.409888	0.403175	0.0879799
38.9431	0.214886	0.598627	-0.0105506	0.408229	0.57994	1.33722	1.18195	0.0933701	0.459557	0.341543	-0.153331	0.0679117	0.393882	0.294607	-0.04412	1.04333	0.792051	0.626555	0.258642	0.220166	-0.0988231		0.409792	0.402872	0.0879138
39.0414	0.164764	0.619579	-0.0171197	0.387802	0.569354	1.32667	1.20204	0.100734	0.465826	0.338416	-0.150081	0.0744308	0.397711	0.291801	-0.0144383	1.05029	0.765008	0.646035	0.259857	0.218613	-0.0851918		0.4101	0.402407	0.0878124
39.1397	0.110482	0.636931	-0.0221004	0.36302	0.561091	1.30882	1.21881	0.10074	0.466631	0.327723	-0.146294	0.0830244	0.401304	0.287426	0.0194276	1.05871	0.741993	0.663796	0.259256	0.218173	-0.0679699		0.409095	0.401668	0.0876511
39.238	0.0568282	0.654754	-0.0325931	0.338993	0.561108	1.29365	1.22761	0.1034	0.467148	0.314359	-0.138334	0.0927014	0.403335	0.28523	0.0565603	1.06716	0.713642	0.677202	0.25938	0.218224	-0.0481331		0.408201	0.40064	0.0874269
39.3363	0.00319809	0.669123	-0.0383227	0.308509	0.569995	1.26841	1.22816	0.106265	0.467688	0.303066	-0.120991	0.100918	0.401582	0.283872	0.0918774	1.07736	0.683323	0.694455	0.261497	0.217742	-0.0307387		0.407	0.398302	0.0869165
39.4346	-0.041454	0.67936	-0.045551	0.277084	0.575629	1.23898	1.22868	0.112002	0.471238	0.294626	-0.101677	0.111919	0.403131	0.281075	0.127921	1.08363	0.651985	0.711935	0.264831	0.220584	-0.0150681		0.406231	0.395212	0.0862423
39.533	-0.0733791	0.688606	-0.0538184	0.244624	0.58283	1.21546	1.22609	0.12356	0.478688	0.28953	-0.0825789	0.125812	0.402882	0.280116	0.161191	1.08506	0.613035	0.735642	0.26918	0.222576	-0.00132478		0.40637	0.392108	0.085565
39.6313	-0.0961749	0.692263	-0.0605222	0.211176	0.592525	1.18497	1.22487	0.128058	0.484673	0.287465	-0.0607387	0.142371	0.400286	0.283275	0.192149	1.08454	0.573646	0.752174	0.275576	0.225445	0.0118019		0.406182	0.387967	0.0846613
39.7296	-0.113361	0.696705	-0.0705774	0.179011	0.607925	1.15746	1.22409	0.123859	0.491136	0.285295	-0.0375778	0.159667	0.394395	0.287874	0.222971	1.07501	0.536948	0.763751	0.280169	0.228682	0.026013		0.405687	0.384115	0.0838208
39.8279	-0.130084	0.703281	-0.0814123	0.145847	0.622321	1.12933	1.21755	0.126745	0.49723	0.278174	-0.0105577	0.176771	0.383566	0.294939	0.252683	1.05965	0.504449	0.772613	0.286038	0.236301	0.0408726		0.405062	0.379381	0.0827878
39.9262	-0.14188	0.708742	-0.0859539	0.113088	0.636959	1.10132	1.21092	0.134023	0.504567	0.265484	0.020807	0.192352	0.373722	0.303761	0.281597	1.04252	0.468103	0.773711	0.292606	0.245544	0.0556438		0.40465	0.373804	0.0815707
40.0245	-0.149785	0.710911	-0.0930686	0.0792883	0.643391	1.07044	1.20369	0.14098	0.51127	0.253718	0.052702	0.205854	0.364691	0.315016	0.312055	1.01829	0.433511	0.772509	0.298203	0.250012	0.0700289		0.403034	0.36766	0.08023
40.1228	-0.1574	0.71386	-0.0993322	0.0504237	0.643014	1.037	1.19248	0.154256	0.515637	0.239939	0.0774583	0.218319	0.358593	0.324918	0.345129	0.986158	0.402857	0.766316	0.30543	0.252421	0.0829827		0.400498	0.360513	0.0786704
40.2211	-0.15836	0.718942	-0.100686	0.0282421	0.647531	1.00689	1.18182	0.170097	0.515114	0.227189	0.10069	0.22891	0.35021	0.334435	0.376421	0.944905	0.380016	0.75309	0.313006	0.256269	0.0970007		0.398654	0.352363	0.076892
40.3194	-0.161006	0.72094	-0.0988712	0.0109385	0.647546	0.9785	1.17137	0.188166	0.507385	0.20809	0.122931	0.244428	0.344043	0.349649	0.403651	0.907132	0.361783	0.73709	0.319665	0.261177	0.111436		0.396954	0.344334	0.0751398
40.4177	-0.156407	0.715911	-0.095469	0.00339144	0.64217	0.949929	1.1617	0.202124	0.49577	0.183327	0.141309	0.25445	0.335752	0.364802	0.429526	0.872746	0.349033	0.718582	0.325543	0.264208	0.124035		0.394402	0.335951	0.0733104
40.516	-0.143899	0.706253	-0.0931851	-0.00168887	0.636145	0.917987	1.14171	0.21208	0.485878	0.157954	0.150554	0.263443	0.325242	0.373838	0.448989	0.836156	0.335032	0.699836	0.329138	0.264942	0.134723		0.389577	0.326229	0.071189
40.6143	-0.13277	0.698428	-0.0926575	-0.00987801	0.628519	0.890248	1.11844	0.21837	0.472913	0.137764	0.152852	0.270043	0.312928	0.380862	0.460335	0.799514	0.328933	0.674555	0.33057	0.269696	0.142191		0.383421	0.317092	0.0691952
40.7126	-0.124339	0.690192	-0.0906244	-0.0153019	0.620909	0.862133	1.09674	0.220788	0.458621	0.118144	0.156311	0.277707	0.299778	0.38208	0.463715	0.762505	0.331215	0.641953	0.327056	0.272441	0.146521		0.376121	0.308024	0.0672164
40.8109	-0.107693	0.677442	-0.0846355	-0.0163292	0.619612	0.839643	1.07443	0.219557	0.440154	0.0959656	0.159106	0.285393	0.289767	0.37972	0.46051	0.724471	0.330916	0.606441	0.323044	0.274421	0.147681		0.368553	0.298453	0.0651278
40.9092	-0.0817034	0.660659	-0.082378	-0.0235162	0.622182	0.823998	1.05342	0.222568	0.42648	0.0774486	0.163404	0.290242	0.281163	0.378385	0.447853	0.687856	0.32867	0.56351	0.314013	0.274283	0.145185		0.360654	0.289463	0.0631661
41.0075	-0.0526746	0.639704	-0.0878399	-0.0251704	0.624671	0.80507	1.02842	0.227504	0.411436	0.0639822	0.16805	0.294296	0.275973	0.378697	0.429598	0.648233	0.336562	0.516355	0.304505	0.272434	0.142886		0.352509	0.279318	0.0609523
41.1058	-0.0234075	0.61586	-0.0925789	-0.0188193	0.622994	0.792126	1.00038	0.227902	0.392866	0.0504984	0.16917	0.297216	0.271686	0.377897	0.412743	0.612422	0.350352	0.472111	0.294868	0.270593	0.137364		0.344488	0.269523	0.0588147
41.2041	0.016205	0.596671	-0.0991797	-0.0135297	0.616705	0.789402	0.970361	0.235992	0.376873	0.0481835	0.169057	0.300878	0.267132	0.376521	0.392236	0.57977	0.362726	0.432752	0.285188	0.266016	0.127426		0.337971	0.26023	0.0567869
41.3024	0.0609472	0.57862	-0.0981274	-0.0109879	0.604685	0.791134	0.943589	0.238958	0.361907	0.0482034	0.160994	0.302066	0.261359	0.375742	0.366568	0.546392	0.377842	0.398997	0.274527	0.259292	0.115249		0.331331	0.251906	0.0549704
41.4007	0.103425	0.562229	-0.0998893	-0.00619484	0.590165	0.802821	0.920855	0.240311	0.351913	0.0464787	0.140013	0.303319	0.255918	0.377608	0.343508	0.513348	0.394728	0.365926	0.261695	0.249259	0.100788		0.324677	0.246821	0.0538607
41.499	0.141582	0.547954	-0.102878	-0.00315504	0.582216	0.815933	0.898459	0.242504	0.341237	0.0426861	0.121562	0.301852	0.243892	0.378593	0.317123	0.483427	0.413895	0.332958	0.247466	0.238105	0.0865908		0.317714	0.244044	0.0532547
41.5973	0.162299	0.528771	-0.105122	-0.00186583	0.56787	0.822681	0.882119	0.237767	0.329181	0.0372267	0.1068	0.295909	0.234314	0.377816	0.293206	0.461772	0.438779	0.290987	0.23585	0.227677	0.0725694		0.309362	0.242667	0.0529542
41.6956	0.179574	0.511621	-0.105021	0.00223351	0.551389	0.835767	0.866781	0.23867	0.322065	0.0337401	0.0913396	0.283893	0.225037	0.372728	0.270449	0.445578	0.461807	0.251965	0.222333	0.214478	0.0566309		0.301574	0.242644	0.0529494
41.7939	0.191386	0.496216	-0.104328	0.00560795	0.529436	0.843845	0.856265	0.242955	0.315795	0.0336575	0.071565	0.268431	0.221625	0.3666	0.248725	0.432079	0.485947	0.216799	0.208357	0.200574	0.0403116		0.293898	0.243291	0.0530904
41.8922	0.203278	0.481065	-0.0983461	0.0101581	0.510188	0.859423	0.848293	0.242646	0.309703	0.0401174	0.0436439	0.255072	0.22058	0.355182	0.230857	0.420923	0.507772	0.18452	0.192843	0.183105	0.0225642		0.286837	0.245433	0.0535579
41.9906	0.209016	0.465897	-0.0988352	0.0131765	0.4926	0.88417	0.838549	0.239031	0.302466	0.048543	0.0125905	0.240639	0.214643	0.34316	0.214043	0.411567	0.538927	0.159431	0.173577	0.164157	0.00650107		0.279707	0.250368	0.0546347
42.0889	0.209269	0.448792	-0.0954631	0.0190025	0.480628	0.91428	0.83033	0.237574	0.294635	0.0523731	-0.0141748	0.226847	0.207261	0.3328	0.193066	0.408865	0.567875	0.138324	0.155088	0.149651	-0.0113065		0.273606	0.256625	0.0560002
42.1872	0.208372	0.426407	-0.0930419	0.0222012	0.479012	0.948297	0.825137	0.234558	0.28243	0.0579061	-0.0354488	0.212103	0.199397	0.32392	0.172278	0.413955	0.596461	0.119213	0.133482	0.137066	-0.0283208		0.268352	0.264502	0.057719
42.2855	0.206275	0.397887	-0.0949602	0.0189366	0.46724	0.980403	0.815882	0.227859	0.27303	0.0641512	-0.0580273	0.19834	0.19336	0.314781	0.152817	0.424113	0.625784	0.103742	0.110192	0.124789	-0.0461033		0.261928	0.272542	0.0594736
42.3838	0.205353	0.373322	-0.0976058	0.0128452	0.459506	1.01299	0.800199	0.220568	0.269718	0.0731286	-0.0763979	0.182597	0.187845	0.299773	0.140612	0.429335	0.648282	0.0894397	0.0874169	0.11317	-0.0633156		0.255656	0.279811	0.0610598
42.4821	0.200498	0.353082	-0.098691	0.00462415	0.453264	1.05186	0.780353	0.219576	0.272365	0.0897016	-0.0929901	0.1702	0.186404	0.288557	0.131782	0.431012	0.670673	0.0762289	0.0659676	0.100901	-0.0822987		0.251099	0.287643	0.0627688
42.5804	0.189903	0.339328	-0.0999534	-0.00159121	0.451836	1.09552	0.765186	0.223447	0.273932	0.106052	-0.105406	0.157076	0.188192	0.284455	0.125832	0.438983	0.695951	0.0641281	0.0487604	0.0893437	-0.101184		0.249038	0.297173	0.0648485
42.6787	0.180972	0.323622	-0.100087	-0.00369399	0.452165	1.14014	0.749363	0.227547	0.284139	0.118864	-0.111084	0.144035	0.192794	0.283347	0.126249	0.44743	0.722454	0.058213	0.0342986	0.0762636	-0.1167		0.249064	0.306284	0.0668366
42.777	0.177135	0.311371	-0.101538	-0.00389665	0.448924	1.18627	0.735112	0.2362	0.296154	0.131976	-0.119576	0.127723	0.200091	0.28557	0.130492	0.457688	0.746204	0.0586628	0.023227	0.0651518	-0.131406		0.250549	0.315585	0.0688662
42.8753	0.171411	0.307026	-0.102392	-0.00845511	0.440314	1.2272	0.72302	0.248895	0.312607	0.147369	-0.127428	0.110311	0.201622	0.290678	0.142262	0.470036	0.772784	0.0630183	0.0130052	0.0537996	-0.143365		0.253034	0.324639	0.0708419
42.9736	0.155697	0.302104	-0.0973688	-0.00960153	0.428621	1.25896	0.712406	0.264684	0.327589	0.166232	-0.132012	0.0951875	0.200225	0.29115	0.159778	0.485071	0.803351	0.0757175	0.00593326	0.0429049	-0.152181		0.256402	0.331952	0.0724378
43.0719	0.133148	0.305785	-0.0849805	-0.0088831	0.416074	1.29182	0.70593	0.27524	0.335882	0.187187	-0.138441	0.0810103	0.199742	0.295121	0.174731	0.500774	0.82502	0.0900108	-0.00327888	0.0341651	-0.159235		0.259849	0.339031	0.0739825
43.1702	0.113166	0.31245	-0.072774	-0.0122167	0.416463	1.32223	0.699636	0.289937	0.347467	0.211871	-0.147349	0.0699556	0.203184	0.3005	0.191655	0.510116	0.837399	0.104627	-0.0114271	0.0257365	-0.163738		0.264233	0.345413	0.0753754
43.2685	0.0866317	0.321501	-0.0592605	-0.0118343	0.421778	1.34483	0.696178	0.298046	0.363027	0.233973	-0.154524	0.0582019	0.203942	0.309873	0.209098	0.513297	0.850976	0.11422	-0.01847	0.0180275	-0.164456		0.268336	0.350912	0.0765752
43.3668	0.0558829	0.333449	-0.0454447	-0.00927253	0.42619	1.3603	0.6957	0.313633	0.378897	0.25372	-0.158617	0.0489135	0.205167	0.31723	0.226004	0.518241	0.863823	0.12338	-0.0244463	0.0114232	-0.16491		0.272822	0.35557	0.0775916
43.4651	0.0300895	0.342773	-0.0279818	-0.00289253	0.42554	1.36995	0.696541	0.330717	0.388189	0.27866	-0.15432	0.0419642	0.207394	0.323445	0.240179	0.521336	0.876284	0.128768	-0.0306512	0.00787662	-0.160699		0.27777	0.358144	0.0781535
43.5634	0.00322585	0.355293	-0.00718256	0.00489056	0.419851	1.38152	0.693597	0.345656	0.39708	0.307402	-0.152386	0.0331569	0.213792	0.330236	0.257438	0.523731	0.889628	0.138533	-0.035777	0.00350916	-0.153916		0.283299	0.360803	0.0787336
43.6617	-0.0143777	0.377271	0.0117416	0.0153282	0.421761	1.39822	0.684649	0.365336	0.407431	0.336314	-0.154017	0.0269513	0.220085	0.335479	0.271038	0.521859	0.899133	0.152932	-0.0422384	0.00165665	-0.145121		0.290068	0.363587	0.0793413
43.76	-0.031826	0.396448	0.0279185	0.0261588	0.42555	1.41307	0.67277	0.384232	0.414021	0.364066	-0.147403	0.0273934	0.225239	0.343834	0.283957	0.5172	0.91015	0.165506	-0.0461624	0.000619539	-0.1328		0.29714	0.365322	0.0797199
43.8583	-0.0501011	0.413514	0.0451917	0.038407	0.431423	1.43069	0.655745	0.402449	0.417373	0.386419	-0.134839	0.0299927	0.224428	0.358276	0.2955	0.515351	0.91837	0.172239	-0.0472855	-0.00230707	-0.119952		0.303852	0.36691	0.0800664
43.9566	-0.0709587	0.428109	0.0595757	0.0481429	0.439064	1.43699	0.641579	0.419109	0.417226	0.406423	-0.113796	0.0312295	0.222937	0.371971	0.303347	0.512327	0.924912	0.178878	-0.0479037	-0.00156239	-0.104619		0.309666	0.366571	0.0799924
44.0549	-0.0869377	0.443807	0.0754537	0.062818	0.447411	1.43428	0.623233	0.43677	0.413406	0.427811	-0.0926929	0.0332657	0.222445	0.383039	0.312261	0.50902	0.924634	0.187637	-0.046897	7.01496e-05	-0.0899366		0.315281	0.36385	0.0793987
44.1532	-0.101066	0.466593	0.0857801	0.0806361	0.451006	1.42852	0.606658	0.454787	0.405684	0.452786	-0.0750029	0.0352487	0.222314	0.392014	0.321191	0.500096	0.923811	0.194174	-0.0436927	0.00211114	-0.0723457		0.320538	0.360831	0.0787398
44.2515	-0.11278	0.49483	0.0942325	0.100092	0.443273	1.42017	0.590117	0.472037	0.407319	0.476818	-0.0571448	0.0411936	0.22213	0.402329	0.328838	0.483947	0.920499	0.205453	-0.0382868	0.00444468	-0.0561669		0.325874	0.357024	0.0779091
44.3498	-0.12407	0.533038	0.103761	0.122671	0.443265	1.41223	0.578886	0.492348	0.407022	0.501619	-0.0378503	0.0453383	0.222786	0.412942	0.332617	0.465616	0.914002	0.214401	-0.0325703	0.00899507	-0.0419098		0.332149	0.353861	0.0772188
44.4482	-0.13602	0.572372	0.113909	0.144247	0.443771	1.40001	0.574226	0.514766	0.40639	0.5296	-0.0183525	0.048524	0.220964	0.424536	0.332302	0.449258	0.910918	0.222506	-0.0242359	0.0108581	-0.0295753		0.338618	0.351471	0.0766973
44.5465	-0.152825	0.614175	0.118714	0.159093	0.444338	1.38426	0.569523	0.535905	0.407687	0.553387	0.0013899	0.0495736	0.217767	0.431907	0.329964	0.437166	0.899518	0.225643	-0.0145998	0.0161441	-0.016624		0.343433	0.349006	0.0761593
44.6448	-0.167208	0.65419	0.122098	0.171529	0.436426	1.3569	0.567571	0.555877	0.410764	0.577918	0.0202531	0.0535707	0.213142	0.436682	0.327147	0.416691	0.886862	0.227509	-0.00831338	0.0226931	-0.00467661		0.346553	0.345213	0.0753316
44.7431	-0.183405	0.694842	0.127185	0.186027	0.426996	1.31823	0.571284	0.579346	0.409219	0.602634	0.0421476	0.0598148	0.207836	0.441518	0.322015	0.394546	0.868931	0.226311	-0.00591328	0.0294373	0.0052385		0.348773	0.34055	0.074314
44.8414	-0.201208	0.731954	0.135335	0.196227	0.418366	1.28206	0.575484	0.599577	0.405899	0.629794	0.0696813	0.0667391	0.2004	0.44426	0.316012	0.372952	0.85145	0.226362	-0.00207993	0.0364388	0.0130416		0.350893	0.336771	0.0734894
44.9397	-0.215706	0.765169	0.146199	0.209216	0.410597	1.25201	0.574648	0.617408	0.398149	0.650375	0.0974413	0.0762664	0.199339	0.442134	0.305379	0.350439	0.835039	0.222856	0.00172279	0.0445461	0.0180579		0.352442	0.333348	0.0727425
45.038	-0.220839	0.803715	0.152325	0.223198	0.403542	1.22545	0.572367	0.631821	0.390831	0.667345	0.122213	0.0858354	0.203967	0.442844	0.29214	0.324496	0.815282	0.214241	0.00706149	0.0534441	0.0211479		0.353925	0.330317	0.072081
45.1363	-0.217476	0.834774	0.154985	0.231504	0.394615	1.19714	0.572108	0.65249	0.3938	0.679356	0.147203	0.0968259	0.204214	0.439842	0.285338	0.299946	0.798787	0.207457	0.0147033	0.0617182	0.0177938		0.355577	0.327194	0.0713995
45.2346	-0.215182	0.859523	0.157654	0.235227	0.376704	1.16781	0.568733	0.66837	0.392437	0.685249	0.173682	0.105016	0.200234	0.435355	0.274728	0.280349	0.785053	0.201305	0.020892	0.071616	0.0132013		0.355141	0.32393	0.0706872
45.3329	-0.213289	0.87167	0.158415	0.233577	0.35676	1.13915	0.558221	0.68567	0.389133	0.688977	0.195958	0.114081	0.200338	0.424997	0.266479	0.265293	0.769089	0.195666	0.0291156	0.082694	0.00698136		0.353285	0.319809	0.069788
45.4312	-0.211981	0.874469	0.157213	0.233476	0.338175	1.11314	0.546289	0.697161	0.38673	0.694469	0.215568	0.121025	0.201651	0.413669	0.259233	0.247321	0.753723	0.184354	0.0382815	0.0939886	0.00186091		0.350467	0.315692	0.0688897
45.5295	-0.216425	0.880958	0.150988	0.23034	0.320603	1.09293	0.5322	0.710343	0.391708	0.696798	0.233008	0.12735	0.202721	0.399677	0.251318	0.232573	0.740089	0.173271	0.0510714	0.104059	-0.00685174		0.347559	0.313653	0.0684448
45.6278	-0.216857	0.882018	0.140731	0.230166	0.301091	1.06866	0.520131	0.723916	0.395326	0.69637	0.249414	0.134719	0.202045	0.383272	0.241509	0.219349	0.724801	0.156045	0.0663251	0.115226	-0.0185692		0.343604	0.310847	0.0678325
45.7261	-0.215665	0.8735	0.133091	0.231391	0.275815	1.04018	0.513689	0.735687	0.399313	0.69696	0.269413	0.141939	0.202261	0.366512	0.236058	0.206042	0.709648	0.141037	0.0829064	0.122845	-0.0300706		0.339646	0.306991	0.0669908
45.8244	-0.212699	0.867034	0.124711	0.236028	0.249748	1.01379	0.508655	0.746858	0.403851	0.694661	0.277928	0.147476	0.203824	0.348124	0.230724	0.193703	0.692551	0.12927	0.0984195	0.130377	-0.043009		0.335335	0.303668	0.0662657
45.9227	-0.200603	0.859498	0.116681	0.242415	0.223484	0.991034	0.507982	0.760761	0.410055	0.694608	0.280122	0.153377	0.208212	0.322122	0.222454	0.180813	0.675299	0.120126	0.11278	0.141907	-0.0561379		0.331761	0.300575	0.0655909
46.021	-0.184445	0.854438	0.10745	0.252661	0.190409	0.971617	0.507528	0.777576	0.417239	0.691873	0.273995	0.156431	0.213942	0.301346	0.213242	0.169283	0.663418	0.108828	0.12797	0.151285	-0.070688		0.328352	0.298975	0.0652417
46.1193	-0.171457	0.848217	0.103841	0.259233	0.156906	0.953143	0.516384	0.794233	0.431977	0.687692	0.267714	0.157999	0.222561	0.281425	0.200518	0.15879	0.647795	0.0873349	0.142238	0.161892	-0.086856		0.324837	0.298654	0.0651716
46.2176	-0.156823	0.835386	0.107118	0.261436	0.127845	0.937739	0.524829	0.810023	0.455361	0.683276	0.262291	0.159526	0.234115	0.262834	0.191416	0.154946	0.632997	0.0640688	0.154723	0.170868	-0.10503		0.322331	0.298384	0.0651127
46.3159	-0.141319	0.816367	0.115358	0.265259	0.103106	0.919378	0.531827	0.824776	0.473437	0.677262	0.255638	0.158127	0.244339	0.242475	0.182168	0.160276	0.619102	0.0353177	0.166149	0.17828	-0.121606		0.31932	0.297375	0.0648926
46.4142	-0.12771	0.787388	0.12359	0.27091	0.0760902	0.89977	0.533908	0.837829	0.492285	0.667329	0.246284	0.158043	0.252289	0.22151	0.179698	0.168196	0.60679	0.0140842	0.177799	0.181543	-0.135909		0.315796	0.29529	0.0644375
46.5125	-0.110171	0.753524	0.130246	0.281343	0.0490044	0.882533	0.533092	0.84787	0.509722	0.652698	0.231024	0.158833	0.263964	0.201277	0.179029	0.181339	0.590238	-0.00717862	0.185973	0.184854	-0.147316		0.311995	0.292337	0.0637932
46.6108	-0.0835813	0.715665	0.140731	0.299213	0.0236315	0.861455	0.541595	0.854224	0.52329	0.636344	0.212495	0.161435	0.273879	0.182006	0.179608	0.192394	0.583108	-0.0238311	0.19032	0.184372	-0.156457		0.309138	0.288672	0.0629934
46.7091	-0.056442	0.674642	0.157616	0.319114	0.00481303	0.849446	0.548009	0.860464	0.537485	0.618387	0.194983	0.160597	0.283657	0.16111	0.180061	0.209175	0.576011	-0.0414303	0.195054	0.182366	-0.16371		0.30721	0.285746	0.0623549
46.8074	-0.0245886	0.636222	0.174137	0.329872	-0.00814977	0.844742	0.545932	0.864175	0.549722	0.602433	0.168969	0.157309	0.293164	0.142273	0.18206	0.226707	0.572152	-0.0569042	0.204755	0.179751	-0.171465		0.305394	0.2835	0.0618649
46.9058	0.00714686	0.601743	0.186375	0.341516	-0.0178875	0.835006	0.540078	0.868014	0.565483	0.583247	0.136715	0.156478	0.30224	0.12629	0.18514	0.243396	0.568799	-0.0770341	0.210689	0.17864	-0.177123		0.303093	0.28184	0.0615026
47.0041	0.0338944	0.565077	0.192797	0.355691	-0.0250221	0.819928	0.538755	0.868844	0.581323	0.571253	0.105405	0.15204	0.305943	0.116281	0.191539	0.258174	0.565493	-0.095165	0.215531	0.175511	-0.179213		0.30067	0.280384	0.0611847
47.1024	0.0570461	0.525706	0.199731	0.37072	-0.0341322	0.803941	0.538233	0.86329	0.59915	0.558938	0.0749888	0.144557	0.302924	0.104133	0.201952	0.273761	0.560528	-0.109595	0.218907	0.174098	-0.17964		0.297583	0.278831	0.060846
47.2007	0.0736231	0.484664	0.208871	0.385794	-0.0376077	0.786529	0.533764	0.849567	0.609482	0.548822	0.049093	0.133105	0.30331	0.0920338	0.212136	0.287313	0.556682	-0.119541	0.221946	0.172652	-0.17403		0.2942	0.2757	0.0601627
47.299	0.0904366	0.447459	0.21915	0.405964	-0.0369185	0.767464	0.528181	0.835319	0.620628	0.540186	0.0237418	0.122222	0.30531	0.0801647	0.225423	0.300716	0.55262	-0.129253	0.227491	0.16887	-0.168902		0.291727	0.273024	0.0595788
47.3973	0.110389	0.425833	0.231934	0.433816	-0.0326754	0.750726	0.526167	0.821943	0.628695	0.530036	0.00384828	0.109306	0.304377	0.0721752	0.239418	0.316155	0.544332	-0.13862	0.229407	0.165674	-0.163406		0.29093	0.270866	0.0591079
47.4956	0.134148	0.411446	0.245613	0.461346	-0.0292832	0.732401	0.520641	0.811444	0.63157	0.516331	-0.010728	0.0980891	0.302567	0.0651956	0.253635	0.334645	0.537429	-0.142687	0.229	0.163497	-0.159159		0.290816	0.268345	0.0585578
47.5939	0.158463	0.394318	0.26059	0.483865	-0.0216756	0.70617	0.515089	0.798564	0.627406	0.498951	-0.0251263	0.0844137	0.300147	0.0615187	0.270434	0.349673	0.52922	-0.145802	0.224714	0.163224	-0.151663		0.289642	0.264048	0.05762
47.6922	0.178623	0.381924	0.274517	0.502126	-0.00971674	0.683035	0.509445	0.785797	0.629958	0.478295	-0.0403589	0.0736898	0.299217	0.0631612	0.288564	0.363082	0.520189	-0.146427	0.216222	0.163022	-0.142013		0.28916	0.260023	0.0567416
47.7905	0.19126	0.370724	0.286245	0.514379	0.00362523	0.65953	0.500828	0.771136	0.631607	0.454163	-0.0593286	0.0610823	0.296715	0.0694543	0.301196	0.376133	0.512049	-0.14633	0.204574	0.162164	-0.136451		0.286893	0.256387	0.0559483
47.8888	0.199933	0.363885	0.302057	0.520531	0.016554	0.633068	0.488538	0.753674	0.631239	0.432004	-0.0729098	0.045241	0.296955	0.0752128	0.314251	0.388367	0.505445	-0.144803	0.191774	0.161386	-0.130052		0.284398	0.252214	0.0550376
47.9871	0.205808	0.360365	0.316408	0.520038	0.0283885	0.603895	0.470302	0.731677	0.629139	0.411089	-0.0818235	0.0268348	0.296913	0.0814694	0.329987	0.399812	0.498056	-0.140763	0.178071	0.15838	-0.123832		0.280963	0.247158	0.0539343
48.0854	0.210779	0.353318	0.327852	0.516176	0.0454905	0.578644	0.449521	0.706512	0.625191	0.391114	-0.0805268	0.0138736	0.297692	0.0832574	0.347927	0.414838	0.487652	-0.131102	0.163228	0.154879	-0.119219		0.277957	0.240821	0.0525515
48.1837	0.215088	0.346094	0.334611	0.51003	0.0614615	0.550565	0.419441	0.677944	0.613099	0.369684	-0.074418	0.00358558	0.298832	0.0850844	0.36352	0.429662	0.486485	-0.110426	0.148952	0.148618	-0.11447		0.27445	0.232629	0.0507639
48.282	0.223387	0.342946	0.330872	0.502524	0.0785893	0.519548	0.385744	0.644338	0.595187	0.347394	-0.0696046	-0.00785195	0.297203	0.0835071	0.374293	0.43869	0.485556	-0.0859388	0.134665	0.142601	-0.108974		0.26927	0.223409	0.0487518
48.3803	0.23068	0.349528	0.323044	0.493024	0.0953562	0.491261	0.348407	0.607177	0.57521	0.327493	-0.0654338	-0.0185879	0.294445	0.0803749	0.386211	0.441633	0.488719	-0.0604485	0.120155	0.137564	-0.105364		0.263831	0.214767	0.0468659
48.4786	0.241635	0.361849	0.321604	0.48106	0.111455	0.464577	0.310653	0.564511	0.553758	0.313103	-0.0585935	-0.0286673	0.291414	0.0778893	0.39209	0.442622	0.495384	-0.0401059	0.107232	0.132603	-0.104782		0.258633	0.206967	0.0451639
48.5769	0.247081	0.375304	0.319336	0.466177	0.128793	0.435811	0.274494	0.518494	0.531667	0.299127	-0.0451954	-0.0399389	0.28338	0.0763979	0.397047	0.436844	0.505443	-0.0169952	0.0967008	0.128089	-0.106722		0.252921	0.199029	0.0434318
48.6752	0.247136	0.387587	0.315859	0.449196	0.141193	0.411886	0.230575	0.474881	0.510511	0.283581	-0.0255791	-0.0492439	0.274898	0.077303	0.396783	0.429691	0.50581	0.0101359	0.0887671	0.125279	-0.112386		0.246374	0.191023	0.0416846
48.7735	0.246382	0.398704	0.308898	0.43093	0.15367	0.388179	0.184978	0.426711	0.486032	0.267599	-0.00452214	-0.0584959	0.266682	0.0786887	0.39574	0.423887	0.503866	0.0412538	0.0837168	0.123543	-0.118127		0.239444	0.183105	0.0399567
48.8718	0.237453	0.403906	0.302286	0.416662	0.158928	0.363516	0.14327	0.376112	0.464345	0.245407	0.0173991	-0.0651018	0.255893	0.0758307	0.393415	0.423342	0.502648	0.0686565	0.0738191	0.122263	-0.120687		0.231398	0.17693	0.0386093
48.9701	0.226569	0.40525	0.299696	0.404072	0.165498	0.338939	0.1035	0.323883	0.440894	0.22432	0.0425204	-0.0745388	0.244653	0.0701089	0.38963	0.419951	0.500795	0.0989155	0.0620525	0.11885	-0.12344		0.222958	0.172022	0.0375383
49.0684	0.21607	0.402887	0.298908	0.384018	0.171225	0.317415	0.066705	0.274292	0.424331	0.198216	0.0630902	-0.0807749	0.238308	0.0643731	0.378693	0.417497	0.498393	0.129026	0.0522778	0.118554	-0.126465		0.214621	0.168268	0.036719
49.1667	0.205931	0.39778	0.29922	0.361375	0.177234	0.295197	0.0324432	0.230808	0.403722	0.170372	0.0810445	-0.0814048	0.233582	0.0612309	0.360923	0.419124	0.498429	0.157574	0.0388608	0.116607	-0.130671		0.206161	0.165614	0.0361399
49.265	0.196559	0.397106	0.299487	0.346956	0.178558	0.274713	-0.000680645	0.193604	0.390527	0.143467	0.0922694	-0.0790601	0.228667	0.0561429	0.338228	0.419851	0.499754	0.17799	0.0242578	0.11627	-0.136477		0.198009	0.165618	0.0361407
49.3634	0.186038	0.398179	0.295671	0.334325	0.17871	0.254588	-0.0238763	0.155658	0.377612	0.114955	0.100145	-0.0725975	0.224537	0.051832	0.315615	0.416216	0.502654	0.195613	0.00888705	0.116899	-0.141498		0.190008	0.16583	0.036187
49.4617	0.176964	0.385972	0.28945	0.315206	0.17482	0.238161	-0.0453584	0.115672	0.365564	0.0901593	0.0986165	-0.0651159	0.219035	0.0493198	0.289711	0.408353	0.51652	0.215581	-0.00612238	0.116425	-0.147458		0.181023	0.166679	0.0363724
49.56	0.168055	0.367612	0.28242	0.291569	0.173254	0.228623	-0.0676758	0.0744527	0.358766	0.0650885	0.0923301	-0.0603376	0.212109	0.0461749	0.264843	0.395428	0.529102	0.233864	-0.0214637	0.114947	-0.153272		0.171233	0.168379	0.0367432
49.6583	0.16244	0.347515	0.278438	0.274943	0.170726	0.223119	-0.087756	0.0340831	0.355416	0.0481408	0.0889689	-0.0546388	0.204613	0.0434282	0.238526	0.385127	0.542161	0.252313	-0.0338313	0.110206	-0.162063		0.162946	0.17129	0.0373786
49.7566	0.161178	0.32367	0.279409	0.262488	0.170911	0.220066	-0.105617	-0.00651748	0.343383	0.0381209	0.0884581	-0.0503128	0.194884	0.0385477	0.213013	0.373693	0.557694	0.272929	-0.0436987	0.104747	-0.17289		0.155436	0.174802	0.038145
49.8549	0.163712	0.30455	0.279573	0.254954	0.169381	0.221068	-0.116885	-0.0443971	0.332303	0.0326817	0.0892541	-0.0422068	0.186643	0.0345508	0.195361	0.365463	0.576546	0.288526	-0.051636	0.102945	-0.181414		0.150522	0.178744	0.0390052
49.9532	0.172382	0.279345	0.275909	0.248419	0.164904	0.224261	-0.121028	-0.0835499	0.323842	0.0225528	0.0906375	-0.029868	0.172157	0.0337468	0.178096	0.357625	0.595502	0.304237	-0.0576187	0.10311	-0.190818		0.145897	0.18259	0.0398444
50.0515	0.174203	0.252603	0.271785	0.251047	0.167303	0.224989	-0.117564	-0.121202	0.316478	0.0108606	0.0854268	-0.0142565	0.157643	0.0360796	0.162944	0.348976	0.617232	0.320454	-0.0633268	0.10599	-0.200027		0.142268	0.186995	0.0408056
50.1498	0.176024	0.22982	0.27078	0.254687	0.167723	0.225028	-0.113483	-0.154716	0.311751	-0.00135934	0.0704336	-0.00336035	0.139517	0.0402968	0.15093	0.33543	0.638156	0.33139	-0.0688609	0.110059	-0.206769		0.138261	0.191653	0.0418222
50.2481	0.179226	0.207971	0.271458	0.262242	0.164506	0.231391	-0.0986568	-0.185751	0.311372	-0.0125401	0.0508022	0.006363	0.11818	0.0472291	0.145082	0.321682	0.656586	0.340369	-0.0700027	0.11669	-0.212885		0.135777	0.196006	0.0427719
50.3464	0.175062	0.181003	0.280126	0.273863	0.153053	0.237392	-0.076515	-0.212571	0.314319	-0.0256593	0.0347667	0.0197863	0.0981688	0.0611756	0.141067	0.315914	0.676415	0.344871	-0.0723416	0.123465	-0.219185		0.134485	0.200834	0.0438256
50.4447	0.170652	0.146458	0.291943	0.28555	0.143241	0.244902	-0.0436867	-0.234176	0.322793	-0.0390159	0.0169083	0.0315694	0.0820458	0.0789292	0.137474	0.313829	0.698085	0.357084	-0.0735374	0.13026	-0.22392		0.135114	0.206549	0.0450726
50.543	0.163517	0.108293	0.295552	0.299186	0.137223	0.253719	-0.00943435	-0.244764	0.332007	-0.0558504	-0.00278697	0.0427731	0.0678667	0.0942946	0.138159	0.311365	0.718804	0.368144	-0.079027	0.141714	-0.224953		0.135991	0.212023	0.0462672
50.6413	0.158886	0.0746061	0.302342	0.307517	0.128783	0.266809	0.0220377	-0.24766	0.339977	-0.0716253	-0.0301558	0.0546765	0.0552338	0.112737	0.140353	0.315179	0.738655	0.375343	-0.0876372	0.15347	-0.224403		0.137387	0.217945	0.0475594
50.7396	0.158147	0.0446028	0.308676	0.314421	0.120715	0.277698	0.0555878	-0.246945	0.344333	-0.0797736	-0.0654615	0.0613183	0.0442273	0.1304	0.147545	0.320645	0.763485	0.378099	-0.099243	0.163139	-0.22214		0.139023	0.224587	0.0490088
50.8379	0.157233	0.0161099	0.314104	0.323293	0.108321	0.283354	0.0926186	-0.237277	0.35121	-0.085789	-0.104238	0.0689436	0.03029	0.149863	0.15361	0.322569	0.793884	0.377847	-0.111632	0.169887	-0.22209		0.140577	0.23208	0.050644
50.9362	0.163462	-0.00275702	0.316689	0.335476	0.0999541	0.288688	0.134393	-0.225776	0.355535	-0.0851122	-0.136803	0.0748868	0.0184905	0.169562	0.158238	0.320538	0.820468	0.381206	-0.12058	0.175202	-0.226046		0.143605	0.238899	0.052132
51.0345	0.172828	-0.0186394	0.314213	0.349775	0.0869891	0.298488	0.176604	-0.212569	0.358428	-0.0861603	-0.172991	0.0808517	0.00892364	0.193631	0.163315	0.32279	0.842499	0.384114	-0.124047	0.182272	-0.231186		0.147149	0.245901	0.0536601
51.1328	0.187477	-0.0282489	0.311412	0.367657	0.0717398	0.305134	0.213456	-0.198161	0.353632	-0.086032	-0.205288	0.083989	-0.00184392	0.216379	0.174674	0.325097	0.861369	0.384583	-0.127204	0.187471	-0.238886		0.1504	0.252519	0.0551042
51.2311	0.20041	-0.0367002	0.310185	0.385448	0.058128	0.311333	0.247095	-0.184799	0.349257	-0.0809779	-0.233423	0.0795745	-0.00905019	0.240295	0.190572	0.323224	0.886149	0.382586	-0.124467	0.192497	-0.243235		0.154481	0.2593	0.056584
51.3294	0.214999	-0.0417934	0.306802	0.39408	0.0449852	0.325958	0.279106	-0.175495	0.342103	-0.0782852	-0.262192	0.0749327	-0.0171701	0.269112	0.210688	0.322491	0.908309	0.386822	-0.119058	0.196771	-0.246674		0.158881	0.266484	0.0581516
51.4277	0.232019	-0.0505211	0.307032	0.39867	0.0280236	0.349242	0.301675	-0.156211	0.339913	-0.0683545	-0.283488	0.0647817	-0.0262323	0.295068	0.227942	0.323365	0.929451	0.395614	-0.113415	0.20063	-0.249449		0.164084	0.273177	0.0596122
51.526	0.243553	-0.0484865	0.312754	0.405939	0.0153827	0.363639	0.32457	-0.134646	0.341169	-0.0589043	-0.294616	0.0557419	-0.0297121	0.318229	0.246879	0.325022	0.938575	0.400571	-0.104881	0.204471	-0.249898		0.170255	0.276599	0.0603588
51.6243	0.249966	-0.0390728	0.320302	0.414109	-0.00187386	0.370292	0.351071	-0.114891	0.339587	-0.0457893	-0.303585	0.0511146	-0.0307877	0.344713	0.264048	0.333669	0.94814	0.408719	-0.0938177	0.209045	-0.248053		0.177472	0.279738	0.0610438
51.7226	0.256835	-0.0212021	0.326564	0.41667	-0.0277409	0.382017	0.376463	-0.0970145	0.336474	-0.039979	-0.317854	0.0469736	-0.0309295	0.366804	0.280945	0.338376	0.954596	0.421034	-0.0847363	0.214935	-0.245371		0.183517	0.283377	0.0618379
51.821	0.262211	-0.00153327	0.329921	0.417265	-0.0560744	0.387942	0.40272	-0.0755694	0.3367	-0.0423564	-0.333502	0.0415938	-0.0272939	0.386998	0.292708	0.345421	0.959566	0.426855	-0.077971	0.222914	-0.240495		0.188477	0.28681	0.062587
51.9193	0.273322	0.0136852	0.334013	0.416684	-0.0785339	0.391676	0.418036	-0.050938	0.33812	-0.0479084	-0.347429	0.0326003	-0.0250786	0.402443	0.294466	0.352533	0.960647	0.43308	-0.0719521	0.227887	-0.23518		0.192008	0.2893	0.0631305
52.0176	0.278947	0.0320511	0.339735	0.418569	-0.0945536	0.396183	0.428646	-0.0232013	0.340913	-0.047289	-0.363344	0.0211828	-0.0179105	0.414293	0.292261	0.361151	0.960409	0.432969	-0.067356	0.229588	-0.230414		0.195373	0.290891	0.0634777
52.1159	0.286438	0.0482657	0.348641	0.412281	-0.115273	0.404071	0.434954	0.00698672	0.349643	-0.0460346	-0.372954	0.00994952	-0.0091425	0.425796	0.285462	0.369832	0.96141	0.431804	-0.0621586	0.22776	-0.224792		0.198711	0.292179	0.0637586
52.2142	0.29374	0.0628407	0.359002	0.406416	-0.13456	0.411438	0.442199	0.0336528	0.361339	-0.0428463	-0.376656	0.00310627	0.00323346	0.440571	0.272068	0.38104	0.962586	0.430512	-0.055539	0.22593	-0.220126		0.202855	0.293282	0.0639994
52.3125	0.305007	0.0771069	0.369206	0.398443	-0.146023	0.415928	0.439101	0.0602409	0.370503	-0.0396732	-0.379918	-0.00448876	0.0161431	0.450654	0.254024	0.391994	0.960334	0.424548	-0.0549003	0.22453	-0.216667		0.205528	0.293202	0.063982
52.4108	0.315931	0.0977868	0.374778	0.389682	-0.148337	0.42205	0.427812	0.0905054	0.37707	-0.0340247	-0.385339	-0.0137336	0.0284743	0.455114	0.236475	0.393384	0.957157	0.423573	-0.0546457	0.220917	-0.214674		0.207617	0.29211	0.0637436
52.5091	0.324531	0.118963	0.374987	0.382466	-0.154456	0.429762	0.407505	0.118084	0.384322	-0.0311085	-0.386208	-0.0211582	0.0381271	0.458596	0.216883	0.39312	0.944491	0.411647	-0.05464	0.21724	-0.213358		0.207609	0.289386	0.0631492
52.6074	0.330028	0.142335	0.376668	0.370391	-0.15941	0.433773	0.388433	0.134942	0.392653	-0.029055	-0.388735	-0.0309093	0.0483221	0.465191	0.193893	0.393627	0.928831	0.401181	-0.0495588	0.209444	-0.214022		0.206573	0.286934	0.0626142
52.7057	0.336771	0.161424	0.374207	0.36448	-0.162446	0.435805	0.37396	0.146666	0.402213	-0.0259865	-0.383182	-0.0405632	0.0606454	0.464462	0.167589	0.387123	0.913108	0.389565	-0.0401712	0.202953	-0.215701		0.205377	0.283463	0.0618568
52.804	0.343041	0.177307	0.373427	0.358664	-0.161165	0.442599	0.356417	0.151842	0.416884	-0.0291176	-0.37052	-0.047263	0.0724964	0.461545	0.139637	0.381417	0.895726	0.377391	-0.0264555	0.199791	-0.2149		0.204703	0.279298	0.0609478
52.9023	0.349983	0.191268	0.372062	0.348423	-0.156931	0.455243	0.333089	0.150643	0.432267	-0.0325487	-0.356094	-0.0513436	0.0877498	0.454535	0.109959	0.372386	0.871169	0.365743	-0.0138152	0.199754	-0.213779		0.203322	0.274052	0.059803
53.0006	0.352753	0.19487	0.374064	0.334531	-0.154476	0.469494	0.305631	0.150662	0.450683	-0.0347373	-0.343892	-0.0538816	0.10121	0.454362	0.0815463	0.359539	0.849929	0.353292	-0.000728483	0.201301	-0.209996		0.201722	0.269923	0.058902
53.0989	0.349379	0.196232	0.380619	0.317365	-0.150106	0.478081	0.277842	0.150523	0.469303	-0.0360943	-0.331093	-0.0527874	0.111433	0.449629	0.0503896	0.347836	0.832612	0.339536	0.0102116	0.201623	-0.203983		0.199455	0.26589	0.0580219
53.1972	0.339682	0.199421	0.388785	0.301316	-0.144365	0.490529	0.252427	0.144919	0.49038	-0.0342807	-0.318289	-0.0506392	0.119287	0.444377	0.0137335	0.336785	0.813512	0.329174	0.016495	0.199917	-0.196619		0.196978	0.26262	0.0573084
53.2955	0.334312	0.204117	0.3943	0.287944	-0.138438	0.506025	0.230833	0.137196	0.51136	-0.0324381	-0.306631	-0.0416156	0.124616	0.436296	-0.0259285	0.325158	0.784592	0.322003	0.0189873	0.196558	-0.195079		0.194008	0.259636	0.0566572
53.3938	0.328144	0.204478	0.397856	0.280409	-0.130659	0.511701	0.212714	0.135286	0.529164	-0.0237497	-0.287902	-0.0323418	0.131031	0.424476	-0.0658885	0.315747	0.755602	0.312095	0.0201654	0.190954	-0.195669		0.191124	0.255526	0.0557603
53.4921	0.323772	0.206286	0.399981	0.274492	-0.119516	0.510204	0.195926	0.123505	0.54139	-0.0208334	-0.274131	-0.0195033	0.136205	0.416611	-0.104812	0.30939	0.723369	0.296928	0.0201005	0.186008	-0.196735		0.187078	0.251568	0.0548965
53.5904	0.320243	0.204227	0.394634	0.266523	-0.110664	0.514937	0.179042	0.108978	0.551162	-0.0194987	-0.260352	-0.00767786	0.138044	0.408854	-0.145188	0.30682	0.700595	0.283781	0.0173999	0.182068	-0.199342		0.182599	0.249778	0.0545061
53.6887	0.32048	0.20238	0.381784	0.260142	-0.0996867	0.522262	0.159913	0.0936672	0.560383	-0.0178868	-0.24663	0.00168395	0.139426	0.396457	-0.184113	0.298179	0.675295	0.266727	0.0143667	0.176267	-0.203118		0.177046	0.247866	0.0540888
53.787	0.320104	0.194319	0.367469	0.256351	-0.0737657	0.525361	0.139965	0.0795867	0.570025	-0.0144407	-0.23064	0.0107683	0.141649	0.385818	-0.222196	0.297867	0.654801	0.247787	0.0133894	0.172001	-0.207072		0.172816	0.245865	0.0536521
53.8853	0.318736	0.188149	0.351718	0.252285	-0.0467366	0.531649	0.117309	0.0627241	0.582917	-0.00229426	-0.21606	0.0174584	0.139742	0.37478	-0.254116	0.298039	0.634734	0.235625	0.0146989	0.163129	-0.211618		0.169184	0.244558	0.0533668
53.9836	0.310245	0.185133	0.338556	0.249436	-0.0234001	0.537337	0.102783	0.0429343	0.596693	0.0128356	-0.202388	0.0253656	0.141085	0.367168	-0.279605	0.294457	0.612384	0.225937	0.0171781	0.155314	-0.216439		0.166334	0.24327	0.0530858
54.0819	0.304991	0.183671	0.324168	0.245603	-0.00115832	0.540817	0.0949605	0.0239252	0.605956	0.0216753	-0.187295	0.034691	0.139165	0.362143	-0.300885	0.291307	0.589887	0.222532	0.0190681	0.149636	-0.22155		0.163967	0.241898	0.0527866
54.1802	0.30552	0.188805	0.303583	0.248085	0.0171732	0.541245	0.0869173	0.00397595	0.608902	0.0254481	-0.173965	0.0420717	0.134151	0.355149	-0.31918	0.290845	0.561137	0.212074	0.0231267	0.143447	-0.226434		0.160575	0.239872	0.0523444
54.2786	0.309748	0.194374	0.282636	0.248511	0.0350742	0.540516	0.0747697	-0.011947	0.608055	0.0278715	-0.161357	0.0470292	0.125743	0.344809	-0.329376	0.290002	0.532635	0.201596	0.0276619	0.13742	-0.229834		0.156949	0.237051	0.0517287
54.3769	0.312131	0.199477	0.258867	0.249161	0.0487797	0.538691	0.0696067	-0.0263542	0.612618	0.0301951	-0.149735	0.0516647	0.11886	0.338675	-0.333743	0.288889	0.505823	0.191533	0.0356078	0.127984	-0.230885		0.154183	0.234385	0.0511471
54.4752	0.321304	0.200429	0.240728	0.247814	0.0569727	0.538105	0.066789	-0.0491231	0.615713	0.0362009	-0.13984	0.0534656	0.114057	0.335326	-0.337348	0.290911	0.472448	0.17876	0.0467742	0.122778	-0.230531		0.151511	0.232242	0.0506793
54.5735	0.332761	0.206553	0.227574	0.241956	0.0702906	0.533957	0.0647391	-0.0705489	0.614679	0.0469035	-0.132015	0.0550468	0.109214	0.331703	-0.334676	0.291736	0.441831	0.169279	0.0575855	0.117138	-0.228015		0.14989	0.229243	0.0500249
54.6718	0.349298	0.213329	0.214343	0.244648	0.074787	0.533638	0.0634196	-0.0851076	0.616217	0.0597107	-0.113446	0.0606111	0.0993337	0.325729	-0.327812	0.294233	0.405649	0.159406	0.0671752	0.112388	-0.224463		0.149671	0.22592	0.0492997
54.7701	0.363753	0.220253	0.199473	0.248206	0.0775891	0.532298	0.0605957	-0.101658	0.621325	0.0727704	-0.100802	0.0672422	0.08878	0.325367	-0.319887	0.303773	0.370779	0.155507	0.0741367	0.106716	-0.220767		0.149783	0.224257	0.0489368
54.8684	0.374422	0.22742	0.180404	0.252507	0.0790183	0.52308	0.0609889	-0.11219	0.622523	0.0922279	-0.0930593	0.0740574	0.0794037	0.323628	-0.311769	0.312645	0.33792	0.153092	0.0781514	0.101839	-0.219518		0.149371	0.221929	0.0484288
54.9667	0.381052	0.23808	0.157803	0.262111	0.0813444	0.508467	0.0672393	-0.122769	0.623662	0.112623	-0.0852111	0.0768522	0.0693407	0.325727	-0.295681	0.325518	0.310538	0.154307	0.0817755	0.0944702	-0.215059		0.150104	0.21912	0.0478159
55.065	0.388859	0.25711	0.13393	0.271957	0.0840683	0.492404	0.0721385	-0.135544	0.624702	0.121127	-0.0798877	0.0772892	0.0630505	0.319287	-0.279626	0.344702	0.280719	0.152946	0.0825059	0.0862577	-0.211924		0.149813	0.217405	0.0474416
55.1633	0.40357	0.277711	0.105558	0.280796	0.0821937	0.482294	0.0762516	-0.145962	0.626712	0.131571	-0.0705484	0.0732397	0.0636951	0.313193	-0.258209	0.360714	0.251131	0.1521	0.0831287	0.0747806	-0.209083		0.15023	0.216496	0.0472434
55.2616	0.421455	0.296115	0.0737738	0.28877	0.0786127	0.472874	0.0784299	-0.149454	0.631158	0.137873	-0.067032	0.0694581	0.0672346	0.308853	-0.22904	0.375168	0.225895	0.14813	0.08862	0.0664134	-0.20604		0.151298	0.215936	0.0471211
55.3599	0.43552	0.312066	0.043766	0.289542	0.0749843	0.46417	0.076045	-0.15057	0.639373	0.136969	-0.067652	0.0608576	0.0722778	0.30607	-0.196534	0.389213	0.2069	0.141113	0.0967574	0.0611892	-0.199197		0.152041	0.215722	0.0470744
55.4582	0.450278	0.328769	0.0168945	0.287621	0.071917	0.455856	0.0737155	-0.156732	0.650413	0.128513	-0.0736117	0.0491023	0.0777033	0.304172	-0.166601	0.401396	0.189457	0.131587	0.105296	0.0594734	-0.190644		0.152123	0.217108	0.0473768
55.5565	0.46101	0.345669	-0.00557981	0.284204	0.0663005	0.444979	0.0731393	-0.159716	0.661406	0.119467	-0.0780859	0.0347313	0.0864075	0.297432	-0.135226	0.413677	0.177283	0.125123	0.115549	0.0576039	-0.182328		0.152526	0.218099	0.0475931
55.6548	0.473771	0.362291	-0.0230276	0.282067	0.0613402	0.431773	0.0700154	-0.157624	0.669818	0.111131	-0.0841347	0.018702	0.0963331	0.289391	-0.102616	0.420589	0.163544	0.118462	0.12657	0.0533558	-0.173237		0.152786	0.218662	0.0477159
55.7531	0.484137	0.373302	-0.0323101	0.280664	0.0585866	0.423116	0.0708241	-0.146203	0.682197	0.103415	-0.0903151	2.31144e-05	0.107477	0.285913	-0.0674036	0.4324	0.153608	0.109974	0.137263	0.0523235	-0.163473		0.155025	0.21939	0.0478748
55.8514	0.487201	0.382824	-0.0385494	0.282101	0.0437205	0.414956	0.0743579	-0.133252	0.696029	0.0980178	-0.0956675	-0.0191408	0.119192	0.288899	-0.0315854	0.437183	0.140985	0.0974508	0.145585	0.0505678	-0.15395		0.15652	0.220184	0.0480482
55.9497	0.485993	0.385039	-0.042157	0.284333	0.0238067	0.407717	0.0746788	-0.121776	0.705929	0.0892878	-0.0983533	-0.0312143	0.135049	0.292596	-0.00228667	0.44312	0.128163	0.0824095	0.156391	0.0542339	-0.14527		0.157509	0.220623	0.048144
56.048	0.489042	0.387076	-0.0470349	0.284302	0.00204882	0.401031	0.0754901	-0.110102	0.708346	0.0739967	-0.102068	-0.0417936	0.147099	0.292392	0.0247128	0.452187	0.116336	0.0624657	0.165765	0.0604039	-0.136381		0.157396	0.221382	0.0483095
56.1463	0.486155	0.384529	-0.0518084	0.284837	-0.0227751	0.396011	0.0691701	-0.100499	0.710753	0.0622904	-0.107292	-0.0551274	0.162646	0.289119	0.0499629	0.458787	0.107777	0.0407404	0.175013	0.0657194	-0.125334		0.156223	0.222357	0.0485223
56.2446	0.47348	0.376831	-0.0509855	0.28126	-0.0410859	0.394919	0.066266	-0.0892632	0.711903	0.0593763	-0.109117	-0.071143	0.180271	0.287713	0.072382	0.465033	0.103385	0.0284891	0.180427	0.0748604	-0.116561		0.156116	0.221832	0.0484077
56.3429	0.451428	0.368024	-0.0475995	0.282238	-0.0551768	0.394109	0.0688661	-0.0795839	0.712368	0.0564916	-0.110627	-0.0896817	0.199217	0.289044	0.0869557	0.468418	0.0988431	0.017422	0.183736	0.0833247	-0.109945		0.155613	0.221046	0.0482362
56.4412	0.426308	0.362486	-0.0398234	0.286463	-0.071095	0.395665	0.0705449	-0.0725897	0.708435	0.0554202	-0.107825	-0.109541	0.218768	0.282404	0.0967682	0.46911	0.093696	0.00940927	0.184357	0.0966622	-0.10487		0.154798	0.219766	0.0479568
56.5395	0.39484	0.361355	-0.0375579	0.290548	-0.0875424	0.393908	0.0765994	-0.0577696	0.705975	0.0487476	-0.106	-0.125605	0.234653	0.269725	0.102884	0.473359	0.0974806	0.00346048	0.181773	0.106428	-0.100154		0.153672	0.218501	0.0476807
56.6378	0.36296	0.359762	-0.0374587	0.297453	-0.103335	0.391268	0.083542	-0.0428516	0.70556	0.0347242	-0.107121	-0.141439	0.250314	0.254703	0.101298	0.480617	0.104202	0.00150132	0.179609	0.117444	-0.0984098		0.152112	0.218613	0.0477052
56.7362	0.326625	0.358378	-0.0329285	0.296801	-0.107807	0.3855	0.0883116	-0.0267548	0.70257	0.0220076	-0.119276	-0.160854	0.271269	0.23867	0.095525	0.48458	0.120319	-0.000481653	0.174311	0.131148	-0.0961001		0.150086	0.218215	0.0476185
56.8345	0.289664	0.358303	-0.0180311	0.297191	-0.111067	0.380277	0.0908418	-0.00281186	0.690058	0.00938016	-0.122067	-0.182743	0.28923	0.216278	0.0915665	0.483057	0.135779	-0.00658985	0.168678	0.145725	-0.0935569		0.148055	0.215965	0.0471273
56.9328	0.252475	0.362602	0.000858845	0.297622	-0.112085	0.380476	0.0931762	0.0173289	0.680948	-0.0103754	-0.124246	-0.205835	0.300631	0.196456	0.0893313	0.480049	0.151536	-0.0155485	0.165295	0.154773	-0.0924557		0.145858	0.215515	0.0470292
57.0311	0.222179	0.369421	0.0261845	0.290904	-0.114795	0.386555	0.0981799	0.0392659	0.668975	-0.0336666	-0.127193	-0.226489	0.311781	0.176711	0.0853333	0.476701	0.163961	-0.0318581	0.160662	0.165233	-0.0956555		0.143447	0.216253	0.0471902
57.1294	0.195169	0.372735	0.0493463	0.284672	-0.11902	0.393625	0.105819	0.0640389	0.653897	-0.0437153	-0.127239	-0.245281	0.320834	0.161152	0.0858267	0.468824	0.178644	-0.0473493	0.157858	0.177714	-0.0981547		0.142352	0.216196	0.0471779
57.2277	0.161863	0.375324	0.0790283	0.279853	-0.111399	0.404782	0.114873	0.0856138	0.638353	-0.0515902	-0.130046	-0.261831	0.323291	0.146961	0.0833199	0.461872	0.191811	-0.0613676	0.157249	0.196561	-0.103743		0.141942	0.216246	0.0471887
57.326	0.130111	0.374129	0.113605	0.275324	-0.0974021	0.420042	0.12553	0.100508	0.617826	-0.0507293	-0.122066	-0.278917	0.324176	0.126163	0.0776883	0.46082	0.205637	-0.0723423	0.15397	0.213899	-0.110796		0.142246	0.215816	0.0470949
57.4243	0.100322	0.377631	0.147197	0.273704	-0.0811633	0.434105	0.139749	0.119727	0.594158	-0.0402168	-0.105493	-0.293574	0.32106	0.101965	0.0733268	0.463933	0.214801	-0.079076	0.147596	0.229904	-0.119569		0.143814	0.215052	0.0469281
57.5226	0.0685624	0.377771	0.182358	0.270642	-0.06175	0.446937	0.148556	0.140096	0.569899	-0.0266427	-0.0843119	-0.306084	0.31513	0.0772337	0.0735816	0.468924	0.219681	-0.0825213	0.140403	0.243521	-0.128593		0.1454	0.214109	0.0467225
57.6209	0.0366249	0.378274	0.210716	0.270866	-0.035732	0.46825	0.15792	0.156132	0.548981	-0.0128917	-0.0652471	-0.31797	0.308118	0.0553256	0.072867	0.468771	0.222721	-0.0844822	0.130032	0.258339	-0.137269		0.147159	0.214529	0.046814
57.7192	0.00276444	0.380819	0.235823	0.272206	-0.0127503	0.492357	0.172857	0.166231	0.532405	0.00114766	-0.049245	-0.329001	0.303268	0.0345531	0.0702871	0.47289	0.222625	-0.0854575	0.12073	0.276177	-0.146787		0.149233	0.217372	0.0474344
57.8175	-0.0277966	0.387652	0.258607	0.273137	0.00861144	0.50968	0.186172	0.168708	0.512306	0.0130375	-0.0320473	-0.336293	0.293631	0.0104543	0.065284	0.474301	0.217006	-0.0832227	0.110909	0.291913	-0.157928		0.14972	0.219689	0.0479402
57.9158	-0.0498149	0.399567	0.281168	0.269672	0.0369703	0.53139	0.199334	0.169071	0.491957	0.0277117	-0.015674	-0.34341	0.282525	-0.0196456	0.060701	0.479999	0.208792	-0.0813571	0.101085	0.305272	-0.168693		0.150791	0.22316	0.0486976
58.0141	-0.0665507	0.420364	0.302686	0.263067	0.0706177	0.550723	0.219255	0.169397	0.471535	0.0388747	-0.000758739	-0.355453	0.27041	-0.0487415	0.0640597	0.480321	0.197473	-0.0804805	0.0851633	0.313788	-0.180581		0.151675	0.227639	0.0496749
58.1124	-0.0865117	0.44	0.322617	0.255069	0.110115	0.570434	0.234198	0.167446	0.456208	0.0573492	0.0167571	-0.369671	0.260077	-0.0747181	0.0737577	0.475965	0.192043	-0.070476	0.0709844	0.317899	-0.192967		0.153646	0.23234	0.0507008
58.2107	-0.0972585	0.457562	0.346358	0.243771	0.150498	0.586383	0.251215	0.167788	0.447687	0.0795517	0.0359467	-0.381499	0.248243	-0.0966637	0.0841824	0.47175	0.184407	-0.0611482	0.0589346	0.323557	-0.207264		0.156857	0.23728	0.0517787
58.309	-0.100472	0.473195	0.371077	0.233202	0.186108	0.594667	0.265024	0.162844	0.441075	0.0970202	0.0506841	-0.387842	0.237624	-0.122016	0.098978	0.463985	0.17855	-0.0554575	0.0481534	0.326788	-0.22072		0.159165	0.24155	0.0527105
58.4073	-0.0968313	0.492815	0.389984	0.219369	0.21622	0.601176	0.276754	0.155592	0.435232	0.115748	0.0605134	-0.391696	0.230713	-0.152484	0.118197	0.458025	0.170824	-0.0477352	0.0351446	0.330499	-0.234888		0.161103	0.24627	0.0537405
58.5056	-0.095203	0.508272	0.406043	0.199277	0.249271	0.606867	0.287062	0.154214	0.429022	0.134105	0.0658371	-0.39404	0.221947	-0.17227	0.138537	0.456223	0.163113	-0.0385118	0.0242071	0.330353	-0.246905		0.16321	0.250323	0.0546249
58.6039	-0.0920033	0.520051	0.422732	0.179557	0.287442	0.617564	0.295568	0.150105	0.422936	0.153382	0.0787624	-0.400336	0.216614	-0.184732	0.164789	0.449178	0.152739	-0.0331454	0.0138602	0.332367	-0.258429		0.166143	0.254932	0.0556307
58.7022	-0.0879639	0.525908	0.440352	0.159565	0.318467	0.631775	0.309571	0.145697	0.415841	0.181233	0.0995	-0.405143	0.21432	-0.194441	0.195634	0.436837	0.138087	-0.0312533	0.00251242	0.331257	-0.269361		0.169447	0.259426	0.0566114
58.8005	-0.080754	0.530468	0.451913	0.145627	0.339774	0.64744	0.330749	0.135746	0.408835	0.204774	0.123624	-0.40817	0.213385	-0.198979	0.227668	0.426548	0.117032	-0.025715	-0.00624919	0.322892	-0.281003		0.172648	0.263432	0.0574857
58.8988	-0.0734091	0.533282	0.453754	0.127206	0.362753	0.66329	0.357102	0.118941	0.410053	0.227379	0.137678	-0.408323	0.220306	-0.197307	0.253612	0.418101	0.0938073	-0.0144718	-0.0146003	0.310337	-0.29226		0.175582	0.267325	0.0583352
58.9971	-0.0656457	0.534352	0.456885	0.108162	0.383741	0.675115	0.385312	0.103793	0.414738	0.256049	0.155321	-0.408696	0.236103	-0.197672	0.276138	0.408747	0.0721315	0.0045484	-0.0245191	0.301984	-0.301031		0.179788	0.271527	0.0592521
59.0954	-0.0623494	0.530055	0.455465	0.0901942	0.40596	0.687304	0.404786	0.0920443	0.422864	0.286199	0.173664	-0.410825	0.251575	-0.199309	0.295143	0.399811	0.0492063	0.028538	-0.0337426	0.295605	-0.307325		0.183565	0.275868	0.0601993
59.1938	-0.0626289	0.520676	0.453912	0.0732396	0.428835	0.699675	0.425456	0.0788762	0.433515	0.312682	0.191465	-0.415558	0.268865	-0.201087	0.305596	0.391352	0.024298	0.0548554	-0.0442203	0.284396	-0.313856		0.186207	0.281005	0.0613202
59.2921	-0.0556144	0.510573	0.445844	0.0572457	0.441293	0.699235	0.443362	0.0653575	0.442096	0.333357	0.209614	-0.421225	0.288276	-0.203062	0.314242	0.382603	-0.000533917	0.0812177	-0.0591319	0.269504	-0.316495		0.187036	0.284188	0.0620149
59.3904	-0.0515546	0.504726	0.434377	0.0430913	0.449758	0.685036	0.460056	0.0596302	0.452048	0.340585	0.223633	-0.426728	0.306463	-0.198703	0.321029	0.364536	-0.0277971	0.108449	-0.0740254	0.255966	-0.316494		0.186385	0.285414	0.0622825
59.4887	-0.05164	0.495758	0.42021	0.0336656	0.453618	0.67154	0.475907	0.0462445	0.46268	0.342462	0.23277	-0.434821	0.329822	-0.190479	0.324291	0.342199	-0.0475222	0.131392	-0.0873127	0.242249	-0.317062		0.18457	0.286557	0.0625319
59.587	-0.0506552	0.492042	0.405832	0.0269766	0.44964	0.664201	0.499386	0.0355247	0.477197	0.344737	0.239678	-0.440088	0.354959	-0.180771	0.322446	0.315096	-0.0614128	0.152189	-0.10034	0.229656	-0.317715		0.183742	0.288296	0.0629113
59.6853	-0.048859	0.489572	0.38959	0.014397	0.437827	0.64848	0.526336	0.0309498	0.488828	0.349013	0.248987	-0.444244	0.376575	-0.171265	0.318806	0.290245	-0.0785843	0.171113	-0.111858	0.216567	-0.317858		0.182125	0.289559	0.063187
59.7836	-0.039079	0.482769	0.375941	0.000626957	0.42927	0.631714	0.548636	0.0308322	0.49743	0.353079	0.259798	-0.446036	0.391309	-0.164364	0.316762	0.261277	-0.0955789	0.189403	-0.124028	0.201214	-0.31902		0.180093	0.290324	0.0633539
59.8819	-0.0284454	0.474423	0.361602	-0.0133199	0.421425	0.616901	0.570751	0.0302346	0.506976	0.356558	0.266298	-0.448249	0.41011	-0.156914	0.310888	0.232197	-0.10572	0.210318	-0.136879	0.185222	-0.318793		0.178361	0.291388	0.0635861
59.9802	-0.0206785	0.460245	0.344073	-0.0241077	0.41093	0.592168	0.58971	0.0317443	0.516783	0.349676	0.270276	-0.44892	0.42724	-0.150298	0.298819	0.197914	-0.111891	0.234692	-0.148135	0.172602	-0.317417		0.17502	0.290634	0.0634215
60.0785	-0.0145832	0.441191	0.32644	-0.0337058	0.400226	0.574185	0.607733	0.0337555	0.52407	0.343972	0.274063	-0.445832	0.442846	-0.141999	0.277538	0.167314	-0.118035	0.259583	-0.156448	0.163588	-0.312674		0.172058	0.289472	0.0631681
10--0	-0.0443564	-0.0321694	-0.0341688	-0.139053	-0.100938	0.181839	-0.0755727	0.0368343	0.0936028	-0.0786361	-0.0520405	0.106406	-0.0500519	-0.0556682	0.00121181	0.043759	0.00749275	0.0294545	-0.000788444	0.0187048	0.0382097
25-35	0.547759	0.533399	0.105181	0.337793	0.830936	1.56023	0.913848	0.0444626	0.5137	0.520188	-0.124824	0.0519684	0.385807	0.0679554	0.2061	0.544061	0.530185	-0.0130614	0.17083	0.28946	0.108309

## Sheet: shRNA-CCK
Time	0325-1 side-1	0325-1 side-9	0325-2 side-2	0325-2 side-8	0331-1 side-5	0331-1 side-8	0331-2 side-183739-2	0331-2 side-183739-5	0401-1 side-151245-2	0401-1 side-151245-8	0401-2 side-171717-1	0404-1 side-155726-4	0404-1 side-155726-6	0404-2 side-2	0404-2 side-4	0404-2 side-5	0411_1 side_164157_1	0411_1 side_164157_4	0411_2_side_4	0411_2_side_5	0412_2 side_1	0412_2 side_5					N=11,n=22	SD	SEM
-24.9545	0.125961	0.387705	0.169096	0.384755	-0.0240722	0.227118	-0.0511498	0.0548276	-0.0203038	-0.156879	0.000403654	0.0245441	-0.183961	0.131106	-0.112725	0.25535	0.037108	-0.0901463	0.0226276	0.182213	0.304523	-0.609558					0.0481156	0.214449	0.0457206
-24.8562	0.125737	0.38277	0.158546	0.38857	-0.0297298	0.223276	-0.0529761	0.0502095	-0.030474	-0.165525	-0.0101739	0.0163336	-0.160203	0.134827	-0.110051	0.257642	0.0404202	-0.0949168	0.0277115	0.185942	0.304428	-0.59752					0.0474929	0.212305	0.0452635
-24.7579	0.125718	0.371778	0.147453	0.387642	-0.0340934	0.219304	-0.0557284	0.0454371	-0.045116	-0.174852	-0.0191776	0.00702766	-0.138229	0.138108	-0.109349	0.258753	0.0414592	-0.0995552	0.033349	0.185409	0.303779	-0.593414					0.0452592	0.21074	0.04493
-24.6596	0.125949	0.35653	0.136819	0.385277	-0.0403759	0.212366	-0.059649	0.0438263	-0.0620689	-0.18516	-0.0283438	0.000147752	-0.116713	0.142953	-0.111677	0.259054	0.0431914	-0.102055	0.0385263	0.185098	0.304678	-0.596352					0.0423645	0.210187	0.044812
-24.5613	0.12486	0.341082	0.12593	0.378652	-0.0481007	0.203526	-0.0653347	0.0453981	-0.0779182	-0.191544	-0.0412219	-0.00939776	-0.0954633	0.144802	-0.116515	0.258575	0.0471197	-0.103709	0.0469267	0.187966	0.299056	-0.606616					0.0385488	0.210144	0.0448028
-24.4629	0.120409	0.325959	0.11513	0.368464	-0.0522653	0.197417	-0.0715693	0.047553	-0.0912742	-0.197122	-0.054496	-0.0144833	-0.0742152	0.142644	-0.118599	0.253342	0.0513113	-0.10248	0.0541982	0.186809	0.298974	-0.613789					0.0350872	0.209256	0.0446135
-24.3646	0.114748	0.310217	0.105109	0.357615	-0.0555023	0.191343	-0.0808493	0.0499423	-0.102343	-0.202131	-0.0713281	-0.019123	-0.0503535	0.140876	-0.122452	0.243278	0.0549443	-0.100368	0.0623707	0.181564	0.302729	-0.616426					0.0315391	0.207813	0.0443059
-24.2663	0.107756	0.291597	0.092732	0.344569	-0.0602513	0.182918	-0.091271	0.0544827	-0.113266	-0.206396	-0.0854842	-0.0222927	-0.0267832	0.138509	-0.128281	0.233989	0.0584761	-0.0968708	0.0698102	0.178114	0.301914	-0.619877					0.0274588	0.206145	0.0439503
-24.168	0.10133	0.272091	0.0775867	0.328074	-0.0620892	0.172877	-0.0999559	0.0635261	-0.118613	-0.208059	-0.0958694	-0.0235331	-0.00408512	0.134685	-0.136844	0.226139	0.0644089	-0.0966718	0.077619	0.175894	0.299093	-0.617013					0.0241178	0.203232	0.0433292
-24.0697	0.0948327	0.251317	0.0637379	0.308054	-0.0651165	0.161658	-0.108791	0.0718194	-0.120817	-0.20872	-0.102258	-0.0253594	0.0161896	0.131917	-0.146455	0.216161	0.0730906	-0.0968577	0.0896554	0.173538	0.295835	-0.60391					0.0213418	0.198707	0.0423645
-23.9714	0.0892424	0.22972	0.0547462	0.28626	-0.0700564	0.152136	-0.116465	0.076338	-0.123827	-0.207968	-0.105574	-0.0314347	0.0331309	0.126404	-0.155412	0.204111	0.0828044	-0.0960021	0.101973	0.16929	0.291823	-0.590452					0.0182176	0.194042	0.04137
-23.8731	0.0836336	0.207836	0.0475003	0.264979	-0.075304	0.145351	-0.12588	0.0785725	-0.124563	-0.203891	-0.10379	-0.0382547	0.0457513	0.121642	-0.163173	0.193921	0.0922	-0.0939439	0.111933	0.161678	0.280493	-0.572301					0.0151996	0.188178	0.0401196
-23.7748	0.0755707	0.184566	0.0388857	0.244338	-0.0821844	0.139035	-0.135062	0.0791417	-0.123461	-0.203742	-0.0984752	-0.0461821	0.0551778	0.117877	-0.172201	0.185328	0.101122	-0.094724	0.121138	0.153817	0.270208	-0.549747					0.0118376	0.182257	0.0388573
-23.6765	0.0680302	0.158311	0.0364514	0.222953	-0.085893	0.131276	-0.142675	0.0789235	-0.119698	-0.203019	-0.0921597	-0.0527899	0.0614339	0.116141	-0.180698	0.174314	0.108608	-0.0975998	0.130699	0.149315	0.255615	-0.5327					0.00840174	0.176751	0.0376835
-23.5782	0.059935	0.132085	0.0356069	0.201518	-0.0889649	0.124876	-0.151474	0.0793639	-0.115688	-0.200748	-0.0867871	-0.0550538	0.06452	0.114977	-0.189719	0.166376	0.117948	-0.0982337	0.142241	0.145277	0.243631	-0.519223					0.00556648	0.172434	0.0367631
-23.4799	0.0486725	0.111425	0.0354255	0.181523	-0.0927703	0.120218	-0.160896	0.0792723	-0.110877	-0.197663	-0.0811231	-0.0575244	0.062165	0.112684	-0.200249	0.158578	0.126991	-0.0976552	0.152532	0.139012	0.22625	-0.50757					0.00220092	0.168448	0.0359133
-23.3816	0.0355404	0.0932959	0.0378586	0.163482	-0.0974636	0.117912	-0.172643	0.0748348	-0.103218	-0.192568	-0.0738742	-0.0581792	0.0556258	0.111043	-0.208167	0.149355	0.137518	-0.0948913	0.161419	0.135345	0.207984	-0.498189					-0.000817276	0.164911	0.0351591
-23.2833	0.0255197	0.076345	0.0422322	0.144211	-0.103583	0.117512	-0.184973	0.0714259	-0.0939563	-0.182313	-0.0668575	-0.0604507	0.0475329	0.111095	-0.215152	0.139879	0.146574	-0.0954787	0.169735	0.130489	0.190621	-0.488111					-0.00353203	0.161571	0.0344471
-23.185	0.0153957	0.0615511	0.0466437	0.128059	-0.111599	0.117203	-0.195243	0.0678195	-0.0825511	-0.173331	-0.0586702	-0.0615645	0.0337311	0.112595	-0.21916	0.129925	0.153355	-0.0966686	0.17453	0.123102	0.170998	-0.471989					-0.00617573	0.157246	0.033525
-23.0867	0.00707219	0.0467298	0.0556881	0.116795	-0.118502	0.114355	-0.203589	0.0650904	-0.070881	-0.165591	-0.0539979	-0.0630294	0.0148941	0.114905	-0.221125	0.121717	0.157443	-0.0970924	0.176665	0.114278	0.147773	-0.454927					-0.00887858	0.152821	0.0325816
-22.9884	-0.000364604	0.0318939	0.0622218	0.111615	-0.124077	0.108853	-0.215646	0.0630498	-0.0616538	-0.159088	-0.0505432	-0.0637669	-0.00420369	0.115853	-0.220216	0.115443	0.160055	-0.0990183	0.179349	0.104744	0.131564	-0.428646					-0.0110265	0.14817	0.0315899
-22.8901	-0.00631627	0.0175419	0.0694414	0.108702	-0.128516	0.105832	-0.227566	0.061022	-0.0524129	-0.151046	-0.0479828	-0.0611498	-0.0245941	0.116554	-0.222115	0.110987	0.160714	-0.0997185	0.180524	0.0946511	0.11853	-0.407803					-0.0129419	0.144858	0.0308839
-22.7918	-0.0147428	0.0019853	0.0744868	0.106833	-0.134662	0.101699	-0.239535	0.0571533	-0.041423	-0.14322	-0.0481533	-0.0581235	-0.0453952	0.114658	-0.227483	0.107449	0.160738	-0.0986842	0.182198	0.0847352	0.105139	-0.395315					-0.0158937	0.143091	0.0305071
-22.6935	-0.0238836	-0.00982365	0.0809188	0.1089	-0.140058	0.0952434	-0.249932	0.0525343	-0.0251091	-0.136985	-0.0474719	-0.0538588	-0.0650727	0.112608	-0.230011	0.104228	0.166555	-0.0965867	0.184277	0.0784693	0.0875104	-0.373845					-0.0173361	0.140811	0.0300211
-22.5952	-0.0341994	-0.0185429	0.0850951	0.110836	-0.144277	0.0889921	-0.256866	0.0432494	-0.00820901	-0.130852	-0.0444058	-0.0489732	-0.0847689	0.107161	-0.232573	0.100497	0.170996	-0.0968993	0.18552	0.0733776	0.0711347	-0.344364					-0.0185486	0.137602	0.0293368
-22.4969	-0.0436814	-0.0269853	0.0869109	0.113039	-0.145982	0.0854032	-0.259402	0.0311402	0.00656005	-0.1253	-0.036127	-0.0431243	-0.105239	0.100511	-0.233296	0.0974614	0.171278	-0.0975079	0.184916	0.0658507	0.0651171	-0.309127					-0.0189811	0.13367	0.0284986
-22.3986	-0.051044	-0.0319125	0.0890522	0.113806	-0.148758	0.0778669	-0.260471	0.0201303	0.0205419	-0.119817	-0.0242986	-0.0413434	-0.126099	0.0988684	-0.234677	0.0974063	0.171045	-0.102464	0.1839	0.0624743	0.0535992	-0.279711					-0.0196321	0.131144	0.02796
-22.3003	-0.057664	-0.0337651	0.0917	0.117062	-0.151627	0.068919	-0.259703	0.00777727	0.0335834	-0.116498	-0.00656954	-0.0386605	-0.150957	0.0981135	-0.233077	0.10085	0.168583	-0.106555	0.182784	0.0602176	0.0405454	-0.253425					-0.0199257	0.129495	0.0276084
-22.202	-0.0628935	-0.0290234	0.0941064	0.118579	-0.15222	0.0590479	-0.257153	-0.008148	0.0456869	-0.1164	0.00800347	-0.0366496	-0.173858	0.0972677	-0.231637	0.104166	0.166254	-0.110611	0.18103	0.0584678	0.0340913	-0.222242					-0.0197335	0.127895	0.0272673
-22.1037	-0.0667871	-0.0217138	0.100726	0.12012	-0.154804	0.0499532	-0.255818	-0.0267453	0.0541158	-0.118387	0.0154861	-0.0358551	-0.197616	0.0970981	-0.227525	0.108575	0.161264	-0.112608	0.176679	0.0553708	0.0279765	-0.197919					-0.0203825	0.127282	0.0271365
-22.0053	-0.0689725	-0.0141276	0.10702	0.122928	-0.156525	0.0410437	-0.252607	-0.0451245	0.0631092	-0.12009	0.0222988	-0.0328289	-0.219702	0.0975505	-0.220144	0.11286	0.151338	-0.112888	0.16892	0.0518365	0.01519	-0.180836					-0.0213523	0.126543	0.026979
-21.907	-0.0715498	-0.00495701	0.110317	0.12675	-0.154937	0.0335075	-0.24865	-0.0569047	0.0706072	-0.122271	0.0262441	-0.0274353	-0.237533	0.0994288	-0.212538	0.118102	0.138505	-0.111728	0.164189	0.0485478	0.00265227	-0.164785					-0.0215653	0.125823	0.0268255
-21.8087	-0.0735033	0.00395778	0.110287	0.132362	-0.153198	0.0252119	-0.242799	-0.066186	0.0775144	-0.126057	0.0253423	-0.0186952	-0.253129	0.103852	-0.204988	0.121743	0.127166	-0.109634	0.159414	0.0452419	-0.00453791	-0.153023					-0.0215299	0.125412	0.0267379
-21.7104	-0.0752789	0.0135318	0.108592	0.136542	-0.1488	0.0175117	-0.237074	-0.0714018	0.0818098	-0.127	0.0230896	-0.00724529	-0.264193	0.10925	-0.194999	0.123887	0.113768	-0.109104	0.153956	0.0441071	-0.0147507	-0.144058					-0.0212664	0.124328	0.0265069
-21.6121	-0.0768646	0.0253748	0.101518	0.141757	-0.144151	0.0131122	-0.231886	-0.0734464	0.0862505	-0.126497	0.0234336	0.00329707	-0.274024	0.11311	-0.184138	0.125544	0.100814	-0.109681	0.149419	0.0408374	-0.0206449	-0.134063					-0.0204967	0.123208	0.0262681
-21.5138	-0.0746916	0.0370975	0.0930949	0.14455	-0.140675	0.0081005	-0.225185	-0.0755725	0.0893128	-0.126405	0.0239316	0.010509	-0.282405	0.116367	-0.173352	0.125619	0.0881731	-0.112827	0.141333	0.0378299	-0.0262483	-0.125214					-0.0203026	0.121686	0.0259435
-21.4155	-0.0665703	0.0458322	0.0855284	0.146888	-0.134809	-0.000518396	-0.215654	-0.0760396	0.0915655	-0.12605	0.0238747	0.0171193	-0.28813	0.11913	-0.160773	0.125306	0.0753604	-0.115089	0.136318	0.0347647	-0.0292085	-0.112954					-0.0192777	0.119456	0.0254681
-21.3172	-0.0594087	0.0560599	0.0749698	0.148417	-0.125321	-0.0081762	-0.203015	-0.0714768	0.0921941	-0.126164	0.0234077	0.0241344	-0.291767	0.122568	-0.150083	0.127767	0.0627269	-0.117288	0.130536	0.0273823	-0.0331001	-0.100237					-0.0179943	0.116865	0.0249157
-21.2189	-0.0554076	0.0652565	0.0613323	0.151038	-0.112298	-0.0158849	-0.189329	-0.0648064	0.0919394	-0.127431	0.0242536	0.0331732	-0.294433	0.124051	-0.139087	0.132823	0.0504574	-0.115306	0.12383	0.0205087	-0.0383284	-0.0835083					-0.0162344	0.114117	0.0243298
-21.1206	-0.0498074	0.0720709	0.0488843	0.152846	-0.0971614	-0.0228885	-0.176355	-0.0573288	0.0922653	-0.127627	0.0243833	0.0417183	-0.293189	0.123936	-0.132183	0.138732	0.0387005	-0.112661	0.118541	0.0183794	-0.0398181	-0.0696539					-0.0140098	0.111529	0.0237781
-21.0223	-0.044354	0.0787362	0.0352375	0.153622	-0.0828374	-0.0304499	-0.167121	-0.0513258	0.0919233	-0.128622	0.028572	0.0508041	-0.286965	0.123679	-0.123427	0.142267	0.0264401	-0.112704	0.114224	0.0203291	-0.0356067	-0.0588613					-0.0116563	0.10902	0.0232431
-20.924	-0.0391677	0.0880776	0.0227	0.15038	-0.0686603	-0.0354481	-0.154559	-0.0457839	0.0909435	-0.129674	0.0338813	0.0609885	-0.282068	0.125474	-0.115961	0.144337	0.0161183	-0.111677	0.109022	0.0248666	-0.0330761	-0.0555401					-0.00931032	0.106904	0.0227919
-20.8257	-0.0352772	0.097036	0.0113552	0.14795	-0.0531208	-0.0404251	-0.140752	-0.0422074	0.0901502	-0.129535	0.038186	0.0681485	-0.278021	0.127482	-0.105876	0.148997	0.00617222	-0.110645	0.103405	0.0282747	-0.033282	-0.0497872					-0.00689879	0.105098	0.0224071
-20.7274	-0.0295848	0.107888	-0.000347381	0.146072	-0.0374201	-0.0453849	-0.125614	-0.0366735	0.0893305	-0.128418	0.0446834	0.0749566	-0.271691	0.129569	-0.0931035	0.15305	-0.00225454	-0.112907	0.0992542	0.030543	-0.0339623	-0.0464951					-0.00402311	0.10351	0.0220684
-20.6291	-0.0231717	0.121962	-0.0156348	0.141818	-0.0218436	-0.0510876	-0.111166	-0.0297717	0.0867364	-0.125606	0.0489852	0.0777685	-0.267375	0.130048	-0.0821356	0.156542	-0.0164072	-0.116501	0.0958577	0.0313086	-0.0278328	-0.0476316					-0.00205172	0.10235	0.0218211
-20.5308	-0.0151777	0.136293	-0.0272836	0.138532	-0.0064625	-0.0561253	-0.0993895	-0.0201291	0.0872913	-0.121126	0.0484768	0.0793257	-0.264072	0.134229	-0.0711044	0.158437	-0.0272605	-0.119992	0.0918583	0.0312088	-0.0251592	-0.0524991					-5.85495e-06	0.102025	0.0217519
-20.4325	-0.00755935	0.151117	-0.0343673	0.138376	0.00796875	-0.0644598	-0.0905067	-0.0116372	0.0903391	-0.116915	0.0415424	0.0802366	-0.259765	0.141581	-0.0608387	0.158854	-0.034074	-0.124581	0.0822665	0.0312757	-0.0300885	-0.0617878					0.00122622	0.102545	0.0218626
-20.3342	0.00174591	0.164505	-0.0398672	0.141843	0.0233338	-0.072507	-0.0827037	-0.00367404	0.0937322	-0.112488	0.0307873	0.0829864	-0.253937	0.145476	-0.0495989	0.156701	-0.0379766	-0.127808	0.0722743	0.0297635	-0.0352685	-0.0638689					0.00288412	0.102778	0.0219123
-20.2359	0.0106817	0.174368	-0.0449642	0.145623	0.0366335	-0.0787691	-0.0749934	0.00754981	0.0965443	-0.108275	0.0194278	0.0843938	-0.244327	0.146243	-0.0404451	0.150955	-0.0375229	-0.132562	0.0630375	0.0303378	-0.0419765	-0.0674281					0.00429687	0.102425	0.0218372
-20.1376	0.0167187	0.179729	-0.0478185	0.151898	0.0476679	-0.0843604	-0.0680323	0.0219818	0.102435	-0.101416	0.0102155	0.0843631	-0.236692	0.146818	-0.0282772	0.143146	-0.0360732	-0.137407	0.0569282	0.0296022	-0.050527	-0.0741556					0.00576104	0.102454	0.0218433
-20.0393	0.019955	0.183674	-0.0501952	0.158481	0.058541	-0.0892921	-0.0617505	0.0358204	0.106719	-0.0961276	0.00604108	0.084605	-0.227296	0.146871	-0.016943	0.134244	-0.0336613	-0.142069	0.0516839	0.0289157	-0.0566192	-0.0750081					0.00757224	0.102254	0.0218006
-19.941	0.0198279	0.188023	-0.0535486	0.166177	0.069046	-0.0919899	-0.0550102	0.0495934	0.107662	-0.0912683	0.00131767	0.0816427	-0.218096	0.144228	-0.00953284	0.127093	-0.0294261	-0.147658	0.0470525	0.02873	-0.0579211	-0.0752799					0.00912104	0.102034	0.0217538
-19.8427	0.0196409	0.190721	-0.0577876	0.172233	0.0762489	-0.0967292	-0.0479909	0.0593544	0.1091	-0.0883741	-0.000888511	0.0778762	-0.210808	0.140517	-0.00463247	0.120198	-0.0233946	-0.154689	0.0392595	0.0276185	-0.0567301	-0.0760909					0.00975687	0.102	0.0217464
-19.7444	0.0196757	0.193682	-0.0610086	0.175408	0.0821816	-0.100702	-0.0409231	0.0662525	0.111892	-0.0859488	8.53296e-05	0.0700106	-0.202225	0.134648	-0.00039957	0.111891	-0.0183333	-0.16132	0.033107	0.0291668	-0.0555391	-0.0752571					0.0102884	0.10145	0.0216293
-19.6461	0.0224154	0.194322	-0.0624664	0.179359	0.0856579	-0.104883	-0.0325329	0.0687608	0.117432	-0.0849834	0.00221521	0.0613904	-0.195783	0.127247	0.00121395	0.103985	-0.0109775	-0.166291	0.0278211	0.0283433	-0.0544594	-0.0739936					0.010627	0.10088	0.0215077
-19.5478	0.0241557	0.19251	-0.0577428	0.183406	0.0898737	-0.112883	-0.0258404	0.0673857	0.121664	-0.0870076	0.00193547	0.0518767	-0.191461	0.12061	0.000530753	0.0992061	-0.00433386	-0.167886	0.0228989	0.0278867	-0.0574229	-0.0703845					0.0104081	0.100483	0.0214231
-19.4494	0.0231539	0.188718	-0.0526761	0.188311	0.0954859	-0.12228	-0.0195142	0.0686924	0.126274	-0.0881447	0.00234957	0.0429667	-0.185433	0.114366	0.00019827	0.0943093	0.00155919	-0.166217	0.0215631	0.0285751	-0.0599153	-0.0656668					0.010758	0.099943	0.0213079
-19.3511	0.0182123	0.185032	-0.0465269	0.191908	0.0992994	-0.129078	-0.0171604	0.0694199	0.133012	-0.0893729	0.00272615	0.0345126	-0.176619	0.108543	-0.00165645	0.0917262	0.00532981	-0.166536	0.017539	0.0283382	-0.0637586	-0.0665285					0.0103801	0.0996498	0.0212454
-19.2528	0.0161259	0.179606	-0.0395202	0.195399	0.100863	-0.134971	-0.0168793	0.0682217	0.13848	-0.0902205	0.00184502	0.0257355	-0.167146	0.100657	-0.00494231	0.085596	0.00785562	-0.170503	0.0176748	0.0328271	-0.0651137	-0.0661369					0.00979339	0.0990915	0.0211264
-19.1545	0.0161525	0.175184	-0.0291063	0.197906	0.100524	-0.140952	-0.0162912	0.0651	0.14571	-0.0931271	-0.000113717	0.0168672	-0.157335	0.0944051	-0.00901357	0.0759838	0.00987548	-0.178635	0.0179618	0.0401631	-0.0647332	-0.0711002					0.00888298	0.0992251	0.0211549
-19.0562	0.0140904	0.17265	-0.0167762	0.198873	0.0979314	-0.147525	-0.0151084	0.063436	0.151719	-0.0964806	-0.00125389	0.0089193	-0.149202	0.0900202	-0.010829	0.0656641	0.0132292	-0.188019	0.0182592	0.0407087	-0.0691696	-0.0798828					0.00732976	0.100034	0.0213272
-18.9579	0.0113759	0.170065	-0.00405597	0.199518	0.0948486	-0.151466	-0.0115367	0.062943	0.15719	-0.0973063	-0.00422425	0.00203436	-0.141027	0.0857888	-0.0164732	0.0582638	0.0206269	-0.194959	0.0198702	0.0391364	-0.0756848	-0.0868078					0.00627819	0.10063	0.0214543
-18.8596	0.00772786	0.165055	0.00881889	0.199811	0.0907227	-0.155297	-0.00966689	0.0597124	0.163233	-0.0953155	-0.00841372	-0.00654637	-0.131376	0.0776855	-0.021453	0.0516646	0.0266912	-0.201973	0.0240543	0.0328909	-0.0829909	-0.087125					0.00490499	0.100611	0.0214502
-18.7613	0.002475	0.159456	0.0201037	0.197801	0.0834165	-0.160582	-0.00829982	0.0569692	0.169118	-0.0943096	-0.0103598	-0.0115559	-0.122327	0.0681307	-0.0254216	0.0431603	0.0329056	-0.211571	0.0309995	0.0280989	-0.0899704	-0.0913938					0.00303833	0.101065	0.0215472
-18.663	-0.004183	0.152429	0.0327664	0.193515	0.073844	-0.163386	-0.00592095	0.0540844	0.172413	-0.0936301	-0.0123597	-0.01627	-0.115902	0.0585311	-0.0302483	0.0346284	0.03779	-0.218253	0.0362551	0.0245968	-0.0974258	-0.0886815					0.00111788	0.100697	0.0214686
-18.5647	-0.0115787	0.140819	0.0470411	0.19176	0.0647882	-0.164266	-0.00407001	0.0531332	0.173408	-0.0911768	-0.00950502	-0.0174458	-0.10587	0.0500859	-0.0370101	0.0271008	0.0453342	-0.222455	0.0382694	0.020994	-0.10796	-0.0852184					-0.000173635	0.0999846	0.0213168
-18.4664	-0.0196291	0.126168	0.0593837	0.189319	0.055043	-0.164937	-0.0034037	0.0515521	0.170752	-0.0910882	-0.00198424	-0.0176666	-0.0924265	0.0399721	-0.0450643	0.0235923	0.0482263	-0.225423	0.0419429	0.0161	-0.11216	-0.0808178					-0.00147953	0.0984643	0.0209927
-18.3681	-0.0255851	0.109611	0.0693418	0.183203	0.0449687	-0.163584	-0.0031763	0.0518305	0.165598	-0.0920931	0.011099	-0.0175704	-0.081376	0.0263255	-0.0527612	0.0216516	0.0496454	-0.228889	0.0503938	0.0116944	-0.113651	-0.075732					-0.00268435	0.0966359	0.0206028
-18.2698	-0.0343691	0.0915698	0.0769974	0.173785	0.0306376	-0.159074	-0.00338547	0.0505774	0.156992	-0.0937901	0.0259942	-0.0173822	-0.0715229	0.0144657	-0.0637132	0.0220741	0.0479031	-0.230851	0.0605351	0.00716778	-0.111247	-0.0759448					-0.00466278	0.0943324	0.0201117
-18.1715	-0.0433257	0.0752752	0.0823959	0.161308	0.0179489	-0.154031	-0.00333447	0.0469547	0.14805	-0.0932982	0.0362993	-0.0169716	-0.0640426	0.00366079	-0.0735029	0.0260254	0.0435475	-0.230851	0.0688823	0.00430027	-0.106105	-0.0710076					-0.00644642	0.0915469	0.0195179
-18.0732	-0.0491058	0.0615603	0.0875934	0.148226	0.00651957	-0.148064	-0.00305252	0.0406089	0.135557	-0.0930228	0.0488598	-0.0168671	-0.0560094	-0.00659966	-0.0858932	0.032327	0.0398595	-0.22959	0.0745059	0.00128501	-0.0991227	-0.0706956					-0.00823277	0.0889223	0.0189583
-17.9749	-0.0511827	0.0479663	0.0902166	0.135847	-0.00512375	-0.14346	-0.00264335	0.0368352	0.12519	-0.0902275	0.061462	-0.0173735	-0.0478207	-0.0142836	-0.0990355	0.0382992	0.0372445	-0.229277	0.0790815	-0.00057272	-0.0944711	-0.0762665					-0.00998165	0.0873609	0.0186254
-17.8766	-0.0502357	0.0346353	0.0946816	0.119099	-0.017984	-0.14209	-0.00710714	0.0311182	0.116832	-0.0892666	0.0717157	-0.0153711	-0.0393307	-0.0212198	-0.108189	0.0434334	0.037554	-0.228628	0.0834159	-0.00257205	-0.0906095	-0.0773316					-0.0117022	0.0860269	0.018341
-17.7783	-0.0493168	0.0225371	0.100683	0.105184	-0.026645	-0.140551	-0.0133169	0.025181	0.110799	-0.0866921	0.079208	-0.0114249	-0.0292196	-0.0278661	-0.11511	0.0475828	0.0380313	-0.226999	0.0885103	-0.00234522	-0.0897411	-0.075932					-0.012611	0.0852517	0.0181757
-17.68	-0.0496442	0.0124377	0.106792	0.092374	-0.033476	-0.139008	-0.0215286	0.0207397	0.103576	-0.0828652	0.0835787	-0.00411542	-0.0185895	-0.0342605	-0.120157	0.0562756	0.0379653	-0.225148	0.0944493	-0.00470617	-0.0878069	-0.0781145					-0.0132378	0.0849191	0.0181048
-17.5817	-0.0514881	0.00585831	0.114681	0.0783036	-0.0403683	-0.138228	-0.0308227	0.0187212	0.0937264	-0.0793841	0.0850717	0.00294875	-0.00764382	-0.040331	-0.120646	0.0658385	0.0369958	-0.223021	0.100658	-0.00602645	-0.0815883	-0.081005					-0.0135341	0.0845785	0.0180322
-17.4834	-0.049262	0.000941059	0.117905	0.0639453	-0.0490825	-0.135917	-0.0393685	0.0195652	0.0863239	-0.0750501	0.0875335	0.0113511	0.00817661	-0.0469676	-0.120021	0.0731372	0.0366033	-0.22183	0.106343	-0.00783646	-0.0737676	-0.0897916					-0.0135032	0.084624	0.0180419
-17.3851	-0.0464466	-0.00150551	0.121527	0.0506256	-0.0588888	-0.129932	-0.0489964	0.0157692	0.0807567	-0.0726685	0.0891138	0.0197241	0.0244072	-0.0535133	-0.119659	0.0807413	0.036162	-0.221246	0.107858	-0.0146489	-0.0691264	-0.098724					-0.0140305	0.0850722	0.0181374
-17.2868	-0.0427525	-0.00257801	0.125021	0.0386723	-0.0692096	-0.123931	-0.0568546	0.0109979	0.0739848	-0.0720603	0.0899787	0.029891	0.0380866	-0.0597784	-0.116798	0.0857009	0.0381541	-0.216885	0.109758	-0.0167977	-0.0581621	-0.104261					-0.0136283	0.0850454	0.0181317
-17.1885	-0.0375023	-0.0028724	0.131227	0.0260906	-0.0789798	-0.123088	-0.0652632	0.0045024	0.0687495	-0.0693026	0.0884069	0.0392801	0.0523023	-0.065126	-0.110347	0.0907357	0.0396826	-0.206443	0.108828	-0.0223556	-0.0486517	-0.111334					-0.0132482	0.0849321	0.0181076
-17.0902	-0.0323352	-0.00255841	0.136305	0.0137314	-0.0893164	-0.119471	-0.0739202	-0.00330525	0.0618383	-0.064242	0.0856454	0.0470147	0.0667498	-0.0695628	-0.102404	0.0961486	0.042563	-0.192986	0.109063	-0.0294662	-0.0438814	-0.116145					-0.0127515	0.0846715	0.018052
-16.9918	-0.0266016	-0.000912561	0.138674	0.00148881	-0.0983532	-0.114119	-0.0843489	-0.0152768	0.0563405	-0.0578033	0.0819171	0.0536185	0.0828596	-0.0747389	-0.092827	0.102456	0.0429715	-0.177816	0.107397	-0.0345314	-0.0353268	-0.116744					-0.0118944	0.0841018	0.0179306
-16.8935	-0.0218411	0.00124951	0.139702	-0.0116722	-0.106219	-0.110117	-0.0944427	-0.0290934	0.0522671	-0.0537269	0.0789792	0.0591338	0.095461	-0.0786194	-0.0826271	0.105245	0.0414771	-0.162396	0.10226	-0.0368701	-0.0263251	-0.117072					-0.0116021	0.0834492	0.0177914
-16.7952	-0.013656	0.00261147	0.139319	-0.0237512	-0.114563	-0.108661	-0.104633	-0.039682	0.0477873	-0.0531095	0.0768193	0.0669383	0.10924	-0.0795714	-0.0712621	0.107237	0.039454	-0.145979	0.0946312	-0.0359903	-0.0143729	-0.122256					-0.0110658	0.0835373	0.0178102
-16.6969	-0.00239792	0.00441682	0.137744	-0.0331919	-0.118419	-0.105931	-0.115064	-0.0459646	0.0432718	-0.0524783	0.074099	0.0728022	0.126827	-0.0787753	-0.0592598	0.107533	0.0398694	-0.126659	0.0835618	-0.0349353	-3.17341e-05	-0.125356					-0.00946996	0.0834093	0.0177829
-16.5986	0.0112927	0.00699027	0.132562	-0.0371611	-0.117377	-0.10575	-0.127187	-0.0528975	0.0418856	-0.0502518	0.0716519	0.0767876	0.144332	-0.075816	-0.047369	0.109677	0.0423294	-0.107876	0.0730243	-0.0363808	0.0168585	-0.132301					-0.00740799	0.0841787	0.017947
-16.5003	0.0278122	0.012015	0.128075	-0.0428607	-0.118732	-0.10375	-0.140451	-0.0649522	0.0420818	-0.0504972	0.0684972	0.0803952	0.159493	-0.069926	-0.0342365	0.109541	0.0444225	-0.0893524	0.0642285	-0.0356464	0.0323644	-0.143096					-0.0056625	0.0861056	0.0183578
-16.402	0.0426921	0.0214436	0.124313	-0.0495758	-0.119469	-0.100714	-0.149447	-0.0764451	0.0434468	-0.0513467	0.0623018	0.0818937	0.170219	-0.0635746	-0.0180545	0.105126	0.0506531	-0.0690704	0.0547547	-0.0343541	0.0424442	-0.153396					-0.00391629	0.087595	0.0186753
-16.3037	0.0541199	0.0348787	0.119583	-0.0553045	-0.120377	-0.0980037	-0.15557	-0.0888807	0.0467293	-0.0504079	0.0547876	0.0818729	0.183187	-0.0541995	-0.00218573	0.0991733	0.0580547	-0.0457449	0.0479175	-0.0323298	0.0546413	-0.159826					-0.00126742	0.0893829	0.0190565
-16.2054	0.067072	0.0489787	0.114243	-0.0585986	-0.118664	-0.0961337	-0.159865	-0.0990607	0.0530472	-0.0469939	0.0455175	0.0811992	0.193855	-0.047257	0.0167273	0.0920214	0.0674184	-0.0219561	0.0397859	-0.0308874	0.0675915	-0.163324					0.00203258	0.0912141	0.0194469
-16.1071	0.082938	0.0621821	0.110851	-0.060435	-0.116949	-0.0956361	-0.162432	-0.108209	0.060877	-0.0447392	0.038907	0.0803686	0.203938	-0.0407827	0.0332891	0.0829353	0.0757156	-0.0012038	0.0314767	-0.0339054	0.0824714	-0.171543					0.00500524	0.094406	0.0201274
-16.0088	0.0976799	0.0727837	0.107754	-0.0643406	-0.11593	-0.095211	-0.163759	-0.117551	0.0716711	-0.0416603	0.0306971	0.0805254	0.21145	-0.0342475	0.0494464	0.0740827	0.0808108	0.0185101	0.0228245	-0.0357897	0.095519	-0.171133					0.00791515	0.09713	0.0207082
-15.9105	0.111881	0.0848696	0.105353	-0.0685261	-0.115226	-0.0933141	-0.162045	-0.128498	0.0805357	-0.0382272	0.021577	0.0824663	0.217058	-0.0310227	0.0645422	0.0653095	0.0840621	0.0392335	0.0173395	-0.0387443	0.109895	-0.167578					0.0109518	0.0999817	0.0213162
-15.8122	0.126026	0.0944228	0.104305	-0.0695554	-0.112258	-0.0876843	-0.153232	-0.136114	0.0885726	-0.0340725	0.0170205	0.0832152	0.221293	-0.0275187	0.0779939	0.0568539	0.083093	0.0591591	0.0112211	-0.0384065	0.120886	-0.167031					0.0144632	0.1018	0.0217039
-15.7139	0.139817	0.10351	0.105743	-0.0739382	-0.112544	-0.080114	-0.141481	-0.144044	0.0940304	-0.0299607	0.0159206	0.0827421	0.222309	-0.0226369	0.0911518	0.0492636	0.0810079	0.0774186	0.00515373	-0.0403789	0.131208	-0.164677					0.0177046	0.103555	0.022078
-15.6156	0.154568	0.111123	0.107521	-0.0804966	-0.114111	-0.0737751	-0.126616	-0.150941	0.0978352	-0.0284164	0.0181537	0.0811988	0.220358	-0.0192359	0.101764	0.0397815	0.0808759	0.0942249	-0.00337883	-0.0419103	0.139315	-0.156247					0.0205268	0.104765	0.022336
-15.5173	0.165358	0.117707	0.107687	-0.0880686	-0.115767	-0.0659198	-0.1113	-0.157745	0.102651	-0.0266288	0.0243917	0.0788154	0.216465	-0.0144443	0.107342	0.028521	0.0806153	0.111644	-0.0151499	-0.044947	0.144897	-0.150636					0.0225221	0.105908	0.0225797
-15.419	0.170911	0.124917	0.111756	-0.0953623	-0.119942	-0.0578973	-0.0942334	-0.166649	0.10431	-0.0238929	0.0296187	0.0774665	0.207703	-0.0100708	0.113611	0.0202451	0.0805435	0.127214	-0.0274862	-0.0468822	0.153637	-0.137062					0.0246571	0.106668	0.0227417
-15.3207	0.174727	0.130775	0.116127	-0.102103	-0.122632	-0.0520142	-0.0757947	-0.173031	0.101155	-0.0199057	0.0351088	0.0745065	0.19597	-0.00521929	0.122321	0.0117888	0.0798016	0.142181	-0.0368547	-0.042088	0.162815	-0.123523					0.0270051	0.106888	0.0227886
-15.2224	0.177275	0.136233	0.120508	-0.109376	-0.123417	-0.0462106	-0.0552265	-0.176957	0.0977494	-0.0129817	0.0418339	0.0696532	0.183323	0.000432532	0.129668	0.00256254	0.079412	0.154172	-0.0451577	-0.0410101	0.16603	-0.107923					0.0291179	0.106454	0.022696
-15.1241	0.17503	0.141404	0.123347	-0.117541	-0.12522	-0.0362424	-0.0326683	-0.178085	0.0936819	-0.00970946	0.0542791	0.063804	0.168537	0.00863073	0.133668	-0.00550155	0.0801027	0.161411	-0.0539125	-0.0378324	0.172613	-0.088229					0.0314349	0.105388	0.0224689
-15.0258	0.171043	0.145395	0.125052	-0.125233	-0.126856	-0.029369	-0.0108237	-0.176529	0.0907383	-0.00646703	0.0693607	0.0590087	0.153343	0.0138342	0.134658	-0.0128548	0.0790106	0.165502	-0.0623923	-0.0346699	0.182785	-0.0691965					0.0334245	0.104636	0.0223085
-14.9275	0.167357	0.145601	0.128688	-0.130889	-0.130835	-0.0237269	0.013672	-0.170088	0.0849926	-0.00514618	0.0849225	0.0548132	0.135988	0.0180517	0.132244	-0.0210796	0.0804394	0.167872	-0.0697301	-0.0284499	0.189318	-0.0496289					0.0351993	0.103416	0.0220483
-14.8292	0.163391	0.147315	0.133118	-0.137022	-0.135822	-0.0184805	0.0378864	-0.159515	0.0773767	-0.00442404	0.0984185	0.050377	0.119261	0.0184738	0.131399	-0.0258612	0.0797761	0.169712	-0.0738849	-0.0268601	0.191213	-0.0289131					0.0366789	0.102345	0.0218201
-14.7309	0.154231	0.150801	0.138713	-0.142967	-0.138439	-0.009844	0.0632149	-0.148238	0.0706257	-0.00172352	0.112613	0.0425644	0.101339	0.0186951	0.127519	-0.0299379	0.0807503	0.16974	-0.0774866	-0.0266172	0.184053	-0.00273844					0.0380395	0.100634	0.0214552
-14.6326	0.143769	0.154234	0.147922	-0.150473	-0.144373	-0.0015813	0.085444	-0.140078	0.0634475	0.00199218	0.126113	0.0329875	0.0811717	0.0157747	0.119713	-0.0322609	0.0791149	0.168736	-0.0759311	-0.0277032	0.174604	0.0257009					0.0385602	0.0999274	0.0213046
-14.5342	0.130452	0.156526	0.161311	-0.165846	-0.155293	0.00853606	0.106809	-0.131214	0.0550975	0.00481018	0.136858	0.0253576	0.0608917	0.0100892	0.111049	-0.037984	0.0759182	0.16796	-0.0738696	-0.0261615	0.164269	0.0566408					0.0382822	0.101341	0.021606
-14.4359	0.11364	0.156359	0.174293	-0.18002	-0.162017	0.0184111	0.128941	-0.118252	0.0450248	0.0108158	0.140513	0.0152165	0.0415386	0.000682931	0.104365	-0.0387321	0.0729273	0.164907	-0.0728116	-0.0274248	0.156829	0.0950569					0.0381938	0.103064	0.0219733
-14.3376	0.0977949	0.151725	0.187694	-0.192429	-0.169419	0.0271442	0.147656	-0.102784	0.033902	0.0193351	0.144781	0.0083555	0.0252693	-0.00856093	0.094144	-0.0367223	0.0670056	0.159846	-0.0723858	-0.0276495	0.150137	0.131555					0.038018	0.105361	0.0224631
-14.2393	0.0838994	0.14227	0.202197	-0.203535	-0.177067	0.0360007	0.165563	-0.0853564	0.0222294	0.0259618	0.149297	0.00331804	0.0105464	-0.0192719	0.0845812	-0.0324088	0.0583677	0.153754	-0.0777596	-0.0299592	0.137327	0.163302					0.0369662	0.108407	0.0231124
-14.141	0.0688571	0.133399	0.218849	-0.213619	-0.182579	0.0448717	0.181133	-0.0697015	0.00989937	0.0316611	0.157495	-0.00392739	-0.000119495	-0.0269767	0.0737198	-0.0278371	0.0475072	0.145369	-0.0863036	-0.0317487	0.121572	0.193927					0.0357022	0.112438	0.0239718
-14.0427	0.0511746	0.125538	0.234545	-0.223669	-0.187209	0.0545136	0.193121	-0.0556219	-0.00281579	0.0374028	0.163946	-0.0108345	-0.00799215	-0.0341085	0.0645548	-0.022442	0.0384373	0.13907	-0.0923716	-0.032165	0.101915	0.225029					0.0345462	0.117024	0.0249496
-13.9444	0.0338777	0.119383	0.247812	-0.229529	-0.192947	0.0639205	0.202898	-0.0396373	-0.0174445	0.0425385	0.168647	-0.0181039	-0.0112917	-0.0388453	0.0564411	-0.0165731	0.0333725	0.131086	-0.0963911	-0.0324531	0.0835677	0.24946					0.0336267	0.121076	0.0258135
-13.8461	0.0154829	0.111438	0.260177	-0.234364	-0.197746	0.0722294	0.209251	-0.0237978	-0.0296686	0.0445969	0.172322	-0.0259204	-0.0124813	-0.0428699	0.0488104	-0.0101408	0.0292137	0.122539	-0.100302	-0.0324438	0.0628578	0.268092					0.0321489	0.124633	0.0265718
-13.7478	-0.00497313	0.107248	0.268876	-0.240749	-0.203938	0.0778062	0.210349	-0.00876337	-0.0408868	0.0491274	0.170262	-0.0348339	-0.0117418	-0.0462465	0.0396225	-0.00522399	0.02678	0.114666	-0.102811	-0.037427	0.0482089	0.286214					0.0300711	0.128292	0.027352
-13.6495	-0.0240396	0.104154	0.273077	-0.243519	-0.210415	0.0822654	0.208547	0.010065	-0.049563	0.053491	0.166058	-0.0468654	-0.00932165	-0.0485841	0.0302712	-0.00187578	0.0256843	0.10876	-0.106453	-0.0403876	0.037848	0.30119					0.0281995	0.131165	0.0279645
-13.5512	-0.0436968	0.0997999	0.277367	-0.242722	-0.215097	0.0879473	0.204165	0.0281882	-0.0565007	0.0601296	0.159726	-0.0595914	-0.00631037	-0.0484916	0.0217029	9.82554e-05	0.0222778	0.102938	-0.107464	-0.043953	0.0278137	0.31334					0.0264394	0.133328	0.0284256
-13.4529	-0.0588917	0.0939562	0.279796	-0.240931	-0.216802	0.0927418	0.199206	0.0447433	-0.0633126	0.0684749	0.148344	-0.074504	-0.00114007	-0.0483584	0.0155812	0.00414826	0.0183659	0.097386	-0.103292	-0.0454339	0.0148283	0.330428					0.0252425	0.135296	0.0288453
-13.3546	-0.0701817	0.087175	0.278016	-0.239268	-0.212832	0.0980569	0.190376	0.0641465	-0.0678529	0.0764036	0.136961	-0.0924161	0.00649963	-0.0480154	0.00907457	0.00462776	0.0148148	0.0938797	-0.0998841	-0.0472865	-0.000959569	0.343367					0.0238501	0.136376	0.0290754
-13.2563	-0.0795877	0.0823015	0.274333	-0.239823	-0.209036	0.104233	0.18158	0.0867005	-0.0665517	0.0828549	0.125521	-0.105775	0.0151993	-0.047365	-0.000451288	0.00637781	0.0118565	0.0900396	-0.096375	-0.0537895	-0.0138228	0.349734					0.0226434	0.13707	0.0292234
-13.158	-0.088466	0.0759858	0.270073	-0.238575	-0.206223	0.109782	0.17003	0.107338	-0.0636362	0.0883502	0.113984	-0.117525	0.0250965	-0.0483814	-0.0115848	0.0110577	0.00792846	0.0861819	-0.0927977	-0.058969	-0.026813	0.35268					0.0211599	0.137376	0.0292886
-13.0597	-0.0963776	0.0680096	0.262522	-0.233259	-0.20355	0.114072	0.156947	0.12571	-0.0603175	0.0953676	0.0986637	-0.126901	0.0360189	-0.053166	-0.0213969	0.0143942	0.00491446	0.0844909	-0.0892611	-0.0655302	-0.0431765	0.348736					0.0189505	0.136596	0.0291224
-12.9614	-0.104305	0.0598268	0.255532	-0.228087	-0.199701	0.119208	0.14532	0.142406	-0.0584466	0.101343	0.0823305	-0.135815	0.0465073	-0.0533002	-0.0299516	0.0180248	0.00313745	0.0853864	-0.087914	-0.0738303	-0.0573181	0.344251					0.0170275	0.136232	0.0290447
-12.8631	-0.111419	0.0516785	0.247347	-0.223305	-0.192897	0.121892	0.131989	0.154945	-0.0541803	0.107739	0.066106	-0.144337	0.0575413	-0.0491778	-0.0353261	0.0231717	-0.000442149	0.0879775	-0.0849667	-0.0854465	-0.0673239	0.337893					0.0154299	0.13528	0.0288418
-12.7648	-0.116514	0.0379392	0.237854	-0.217126	-0.185404	0.125495	0.118916	0.16384	-0.0484351	0.114139	0.0524412	-0.152073	0.0669818	-0.0405766	-0.0427886	0.0284864	-0.00124584	0.0907922	-0.0820687	-0.0933226	-0.0691799	0.32767					0.0143554	0.133344	0.0284291
-12.6665	-0.116801	0.0230263	0.226438	-0.209753	-0.178557	0.128114	0.104518	0.17007	-0.0439636	0.119996	0.0385927	-0.156987	0.074859	-0.0320311	-0.0471448	0.0337647	-0.00266325	0.0957148	-0.0784913	-0.100119	-0.0622877	0.309806					0.0134592	0.129908	0.0276964
-12.5682	-0.118413	0.00715416	0.212358	-0.201302	-0.169021	0.130803	0.0942672	0.174271	-0.0397792	0.123898	0.0231256	-0.159785	0.0798314	-0.0191489	-0.0484929	0.0391367	-0.00537786	0.100726	-0.0784836	-0.105343	-0.0557084	0.29049					0.0125094	0.126082	0.0268807
-12.4699	-0.118951	-0.00655744	0.197865	-0.187458	-0.15588	0.132294	0.0871126	0.177667	-0.0361388	0.122345	0.0101252	-0.161996	0.0855972	-0.00338711	-0.0491368	0.0473781	-0.00992261	0.104488	-0.0789533	-0.110722	-0.0479147	0.269916					0.0121714	0.121628	0.0259312
-12.3716	-0.118133	-0.018797	0.183478	-0.173509	-0.146368	0.131128	0.0807796	0.180021	-0.0292757	0.115063	0.00461582	-0.162095	0.0914515	0.0150305	-0.0505399	0.0514621	-0.0134232	0.108484	-0.0778405	-0.115173	-0.0358672	0.243831					0.0120147	0.116512	0.0248405
-12.2733	-0.115602	-0.0293462	0.166966	-0.158642	-0.134471	0.130257	0.0765102	0.177006	-0.0217895	0.107802	1.15097e-05	-0.164852	0.0966543	0.0337334	-0.0479993	0.0537435	-0.0160859	0.110991	-0.0775676	-0.120374	-0.0187601	0.219637					0.0121738	0.111369	0.0237439
-12.175	-0.112841	-0.0373614	0.149668	-0.144657	-0.122734	0.130246	0.071168	0.172229	-0.015828	0.101513	-0.00566248	-0.166939	0.099846	0.0527911	-0.0459293	0.0543144	-0.0176943	0.112848	-0.0736531	-0.122954	0.00139022	0.19662					0.0125627	0.106443	0.0226937
-12.0766	-0.108737	-0.0463187	0.127404	-0.133073	-0.112941	0.128835	0.0671162	0.168914	-0.0107092	0.0942096	-0.0144802	-0.166381	0.0998204	0.0679394	-0.0419224	0.0551964	-0.0175294	0.116271	-0.0655876	-0.126298	0.0224096	0.173734					0.0126305	0.101762	0.0216958
-11.9783	-0.106785	-0.0553999	0.104804	-0.118737	-0.104887	0.126873	0.0644931	0.167321	-0.00789518	0.0879623	-0.0206068	-0.165659	0.0970639	0.0834615	-0.0375426	0.0568395	-0.0170453	0.119241	-0.0589235	-0.129279	0.0453833	0.156088					0.013035	0.098369	0.0209723
-11.88	-0.107098	-0.0662034	0.0845875	-0.10726	-0.0931583	0.12645	0.0631808	0.164499	-0.00555664	0.0810997	-0.0260979	-0.164076	0.0923751	0.0959457	-0.0321466	0.057275	-0.0178075	0.12217	-0.0556449	-0.132804	0.0671758	0.140447					0.0130615	0.0960482	0.0204775
-11.7817	-0.107195	-0.0759648	0.0640784	-0.097839	-0.0806037	0.127866	0.0629921	0.161174	-0.00596417	0.0768911	-0.0294287	-0.16401	0.0856813	0.109976	-0.0253756	0.0573747	-0.01941	0.123255	-0.0564689	-0.137904	0.0951582	0.130397					0.0133946	0.0955137	0.0203636
-11.6834	-0.10583	-0.087752	0.0446544	-0.0865563	-0.0678691	0.128903	0.0642716	0.156247	-0.00583097	0.0696793	-0.0280644	-0.161836	0.0761199	0.122671	-0.0186966	0.0596788	-0.020393	0.121891	-0.0556593	-0.139459	0.120751	0.120301					0.0139647	0.0947142	0.0201931
-11.5851	-0.104531	-0.103546	0.0275634	-0.0790853	-0.0536639	0.1306	0.0673793	0.148648	-0.00761535	0.0613637	-0.0279121	-0.155118	0.0665165	0.131846	-0.0130587	0.0639729	-0.0222638	0.117783	-0.0538678	-0.142392	0.141696	0.108836					0.0137796	0.09421	0.0200856
-11.4868	-0.101301	-0.118088	0.0105971	-0.0728212	-0.0404685	0.132373	0.0709328	0.138407	-0.0112312	0.0521055	-0.028487	-0.148001	0.0578829	0.14081	-0.00920611	0.0701038	-0.0232808	0.113	-0.0520398	-0.142562	0.159479	0.0950474					0.0133296	0.0938098	0.0200003
-11.3885	-0.0985301	-0.131716	-0.00459537	-0.0650396	-0.0312842	0.133549	0.0739761	0.129249	-0.0153025	0.0407875	-0.0251816	-0.13628	0.0489389	0.147954	-0.00611536	0.075451	-0.0216817	0.106009	-0.052567	-0.143846	0.179081	0.0786925					0.0127977	0.0937216	0.0199815
-11.2902	-0.0972714	-0.146753	-0.016884	-0.0574061	-0.0262077	0.136465	0.0797947	0.116371	-0.0198522	0.030442	-0.0190957	-0.122587	0.0386554	0.157359	-0.00322021	0.0795859	-0.0192177	0.0969371	-0.0516074	-0.14541	0.198078	0.0617734					0.0122704	0.0944897	0.0201453
-11.1919	-0.0950008	-0.162419	-0.0271953	-0.0471789	-0.022722	0.139426	0.0863216	0.0977066	-0.0271487	0.0230127	-0.0114984	-0.112818	0.029347	0.166685	-0.000419272	0.0823423	-0.0167547	0.0879643	-0.0517705	-0.143118	0.216027	0.0551555					0.0120884	0.0959529	0.0204572
-11.0936	-0.0910961	-0.175826	-0.0388201	-0.0413148	-0.0198974	0.141707	0.0932798	0.0810025	-0.0375874	0.0155085	-0.00390245	-0.104528	0.0196696	0.1783	0.00256579	0.0834173	-0.0156539	0.0782036	-0.0524431	-0.140515	0.236146	0.0469863					0.0116002	0.0985743	0.0210161
-10.9953	-0.084588	-0.187158	-0.0464983	-0.0402503	-0.0148902	0.144743	0.0994674	0.0671404	-0.0485984	0.00872552	0.0044814	-0.0981793	0.00858734	0.19237	0.00539454	0.0865474	-0.01641	0.0669138	-0.0516518	-0.136116	0.254921	0.0467397					0.0118951	0.101854	0.0217154
-10.897	-0.075314	-0.197344	-0.0548302	-0.0406603	-0.00971757	0.146517	0.104465	0.0545421	-0.0583721	0.0030252	0.0124057	-0.0925566	-0.00220177	0.203795	0.00998094	0.0904215	-0.0157552	0.0547855	-0.0469191	-0.130085	0.26864	0.0456508					0.0122942	0.104441	0.0222669
-10.7987	-0.0654985	-0.205116	-0.063519	-0.0417844	-0.00534844	0.150602	0.107866	0.0446031	-0.0683717	-0.00390812	0.0213215	-0.0867624	-0.014141	0.210507	0.0113283	0.0915392	-0.0137296	0.0418986	-0.0456219	-0.12265	0.279463	0.0414398					0.0120054	0.106576	0.0227221
-10.7004	-0.0558818	-0.209637	-0.0711393	-0.0427815	-0.0013022	0.154048	0.109768	0.0364858	-0.0774953	-0.00934786	0.0275563	-0.0801814	-0.0226202	0.216517	0.0151982	0.0915608	-0.0148503	0.0296226	-0.043973	-0.116976	0.282136	0.0377195					0.0115648	0.107694	0.0229605
-10.6021	-0.047744	-0.214057	-0.0766813	-0.0455394	0.00267391	0.156692	0.1117	0.0306426	-0.0845527	-0.0162143	0.0337235	-0.0737433	-0.0299802	0.221787	0.017306	0.0921594	-0.0159876	0.0166456	-0.0436883	-0.109575	0.279017	0.0392521					0.0110835	0.1083	0.0230896
-10.5038	-0.0353861	-0.21627	-0.0835642	-0.0482951	0.00389313	0.158653	0.110946	0.0285031	-0.0915095	-0.0217688	0.0421066	-0.0686981	-0.0340218	0.223235	0.0174871	0.0918414	-0.013169	0.00291084	-0.0455437	-0.104352	0.277009	0.0391627					0.0105986	0.108641	0.0231623
-10.4055	-0.0216699	-0.220004	-0.0924043	-0.0526835	0.0019914	0.161488	0.106022	0.0264907	-0.0968761	-0.0213949	0.0467628	-0.0657509	-0.0374696	0.223843	0.0175138	0.0890702	-0.00792085	-0.0111374	-0.0470423	-0.100963	0.270621	0.0399612					0.00947489	0.108662	0.0231668
-10.3072	-0.00770188	-0.224063	-0.10103	-0.058953	0.0013563	0.165195	0.10012	0.0247118	-0.102412	-0.0167156	0.0479263	-0.0619385	-0.0412572	0.221529	0.0156169	0.0878272	-0.00575315	-0.0250105	-0.049452	-0.0959576	0.250285	0.0381593					0.00738557	0.107178	0.0228505
-10.2089	0.00591597	-0.227154	-0.109144	-0.0669577	-0.00116812	0.167224	0.0932561	0.0263047	-0.105681	-0.0123036	0.0473792	-0.0553384	-0.0456213	0.216197	0.0113646	0.087792	-0.00255564	-0.0365945	-0.0487332	-0.0915037	0.220972	0.0351206					0.00494413	0.104509	0.0222814
-10.1106	0.0176744	-0.231128	-0.11462	-0.0741135	-0.00193857	0.168045	0.0868353	0.0278698	-0.105365	-0.00850522	0.0463513	-0.0497839	-0.0530903	0.209147	0.00645908	0.0895595	0.000599396	-0.0485536	-0.047689	-0.0884172	0.192452	0.0323228					0.00245964	0.102191	0.0217872
-10.0123	0.0298447	-0.235218	-0.116132	-0.0802145	-0.00154396	0.170036	0.0800137	0.029207	-0.102615	-0.00440908	0.0466827	-0.0442847	-0.0587771	0.205675	-0.00135703	0.0906782	0.00411705	-0.0632786	-0.0461343	-0.0822556	0.161185	0.0257779					0.000318046	0.100122	0.0213461
-9.91396	0.0465533	-0.242376	-0.118342	-0.0908076	0.000670272	0.173765	0.0734505	0.0313627	-0.0966903	-0.00279491	0.0461397	-0.0388368	-0.0644149	0.201382	-0.00948328	0.0894762	0.00611071	-0.0787741	-0.0440203	-0.0753187	0.127766	0.0130481					-0.00236972	0.0990307	0.0211134
-9.81565	0.0651993	-0.248502	-0.121976	-0.099884	-0.000901311	0.174979	0.0656184	0.0339548	-0.088604	-0.000962197	0.0481814	-0.0322223	-0.0694712	0.196522	-0.0215169	0.0870064	0.00742752	-0.0899141	-0.0384223	-0.0689183	0.0905233	0.00228405					-0.00498172	0.0980833	0.0209114
-9.71735	0.0827655	-0.256216	-0.124511	-0.107128	-0.00364606	0.172914	0.0556206	0.0361643	-0.0798437	-6.05396e-07	0.0502597	-0.0216008	-0.0732635	0.18963	-0.0336944	0.0834891	0.00998488	-0.100174	-0.0308	-0.0599901	0.0492751	-0.00690648					-0.00762146	0.0973444	0.0207539
-9.61905	0.102947	-0.264688	-0.125638	-0.114865	-0.00548907	0.173075	0.0442979	0.0407256	-0.070491	0.00137091	0.0517422	-0.0110902	-0.0752946	0.183782	-0.0463816	0.0774575	0.0113486	-0.106564	-0.0263526	-0.0541414	0.00722491	-0.0169777					-0.0101819	0.0981141	0.020918
-9.52074	0.121415	-0.268661	-0.126562	-0.12006	-0.00626981	0.17156	0.0317258	0.0439616	-0.0595725	0.00257721	0.0568852	-0.00198496	-0.0764123	0.17946	-0.0596365	0.0700913	0.0131155	-0.111253	-0.0224446	-0.0482326	-0.0311493	-0.0251741					-0.0121191	0.0992759	0.0211657
-9.42244	0.137226	-0.272606	-0.127416	-0.12531	-0.00611514	0.169074	0.0178212	0.0509032	-0.0454272	0.00463816	0.0646397	0.00773985	-0.0784474	0.172566	-0.0693116	0.0610325	0.015546	-0.115469	-0.0208416	-0.0433274	-0.0626985	-0.0309175					-0.0134863	0.100944	0.0215213
-9.32413	0.152644	-0.276367	-0.129541	-0.131239	-0.00187586	0.16768	0.00406646	0.0577767	-0.0312245	0.00932276	0.0710219	0.0150071	-0.0802284	0.166414	-0.0785588	0.0492708	0.0143936	-0.119072	-0.0184467	-0.0376828	-0.0921297	-0.0373944					-0.0148256	0.103444	0.0220543
-9.22583	0.166711	-0.278284	-0.132392	-0.137591	0.00523687	0.161883	-0.0101062	0.0656495	-0.0175337	0.0115685	0.0731823	0.0231569	-0.0830737	0.15521	-0.0868755	0.0404518	0.0127111	-0.11984	-0.0172541	-0.033291	-0.119492	-0.0457646					-0.0166244	0.105544	0.022502
-9.12753	0.17942	-0.282208	-0.135627	-0.145003	0.0135761	0.152733	-0.0268277	0.0743518	-0.00426782	0.0114588	0.0735578	0.0334232	-0.0884506	0.140668	-0.0926311	0.0318413	0.0116525	-0.120866	-0.0161989	-0.0332752	-0.151213	-0.0573793					-0.019603	0.108442	0.02312
-9.02922	0.19047	-0.288498	-0.138244	-0.147832	0.022778	0.145838	-0.0445772	0.0808223	0.0110301	0.0108453	0.074762	0.0450136	-0.0932042	0.123651	-0.0972288	0.0234184	0.012101	-0.12121	-0.0150555	-0.0340424	-0.186823	-0.0666903					-0.0223944	0.112241	0.0239299
-8.93092	0.200038	-0.294502	-0.142376	-0.147762	0.029695	0.137714	-0.060855	0.0861456	0.0268094	0.00884739	0.076964	0.0578153	-0.0941449	0.105208	-0.102443	0.0136226	0.0115461	-0.121026	-0.0141936	-0.0359917	-0.220142	-0.0793121					-0.0253792	0.116259	0.0247866
-8.83261	0.208426	-0.300375	-0.147113	-0.143364	0.0353328	0.12917	-0.0766451	0.0902368	0.0423672	0.00507238	0.0800652	0.069648	-0.0945945	0.0862191	-0.108225	0.00202177	0.00824658	-0.120712	-0.017419	-0.038061	-0.246894	-0.0892055					-0.0284455	0.119943	0.0255719
-8.73431	0.214504	-0.302535	-0.1526	-0.136542	0.0406419	0.120815	-0.0889147	0.093808	0.0563261	0.00431165	0.0804455	0.0805129	-0.0923406	0.0694605	-0.111118	-0.00778377	0.00236741	-0.121039	-0.0170164	-0.0385046	-0.270159	-0.0976552					-0.0305916	0.122973	0.0262179
-8.63601	0.216916	-0.30401	-0.157225	-0.131387	0.0462324	0.112031	-0.100712	0.0950862	0.0664264	0.0024911	0.0809451	0.0887906	-0.0896473	0.0503182	-0.115268	-0.0198566	-0.000697599	-0.124005	-0.0195442	-0.0375266	-0.286017	-0.101087					-0.0330794	0.124964	0.0266424
-8.5377	0.218534	-0.302867	-0.165045	-0.12383	0.0511252	0.103267	-0.113287	0.0933345	0.0753347	0.00251236	0.0810307	0.096666	-0.0855466	0.0313385	-0.119355	-0.0343587	-0.00256735	-0.128021	-0.0197049	-0.0397738	-0.295187	-0.10499					-0.0355178	0.126306	0.0269286
-8.4394	0.21585	-0.301089	-0.171317	-0.116426	0.0581045	0.0942923	-0.123805	0.0883232	0.0856475	0.000947184	0.0783973	0.106343	-0.0799536	0.014839	-0.120475	-0.0475966	-0.00666575	-0.129139	-0.0175946	-0.0407572	-0.302733	-0.10723					-0.0373653	0.127002	0.027077
-8.34109	0.21079	-0.298787	-0.174622	-0.108071	0.0678036	0.0841406	-0.131164	0.0841243	0.0959442	-0.00295702	0.0805473	0.118876	-0.074424	-0.00316345	-0.121207	-0.0595983	-0.00978011	-0.126709	-0.0164043	-0.039308	-0.3063	-0.10963					-0.0381772	0.127422	0.0271665
-8.24279	0.204847	-0.29361	-0.178785	-0.0964589	0.0761234	0.0752026	-0.138154	0.0772629	0.102119	-0.00796273	0.0851164	0.129065	-0.0703166	-0.0173129	-0.121632	-0.07128	-0.00970839	-0.122515	-0.0160728	-0.037266	-0.295472	-0.104267					-0.0377762	0.125949	0.0268524
-8.14449	0.197254	-0.287776	-0.183155	-0.0824538	0.0846838	0.0676999	-0.14556	0.0697068	0.10284	-0.0130624	0.092978	0.136779	-0.0654763	-0.0279157	-0.122543	-0.0838832	-0.0092248	-0.117592	-0.0167717	-0.0331454	-0.274805	-0.100866					-0.0369222	0.123598	0.0263512
-8.04618	0.189404	-0.282394	-0.191247	-0.0686799	0.0929399	0.0592709	-0.152588	0.0637694	0.101441	-0.0174105	0.102085	0.143446	-0.0552189	-0.0370117	-0.123886	-0.0993677	-0.00673476	-0.113082	-0.0201479	-0.0279426	-0.255465	-0.0952103					-0.0360923	0.121979	0.0260059
-7.94788	0.18083	-0.275215	-0.199335	-0.0526768	0.100158	0.0498917	-0.161038	0.0554241	0.0992173	-0.0237657	0.112566	0.14917	-0.0435743	-0.0474273	-0.123717	-0.116724	-0.00445333	-0.105338	-0.0254518	-0.0269263	-0.229924	-0.0842644					-0.0351169	0.119889	0.0255603
-7.84957	0.170581	-0.263218	-0.204548	-0.032011	0.106507	0.0381475	-0.169147	0.0426587	0.0937956	-0.0289158	0.121626	0.154952	-0.0303166	-0.0569973	-0.124592	-0.132761	-0.000235567	-0.0956423	-0.0323216	-0.0261652	-0.205062	-0.0660818					-0.0336249	0.117289	0.0250062
-7.75127	0.161077	-0.250792	-0.207513	-0.0129927	0.114307	0.026485	-0.175138	0.0283072	0.087508	-0.0340756	0.126207	0.157418	-0.0171407	-0.065699	-0.120582	-0.147905	0.00355319	-0.0900359	-0.0414486	-0.0227786	-0.17353	-0.0503967					-0.032053	0.11447	0.0244051
-7.65297	0.153028	-0.236031	-0.21102	0.00897786	0.122581	0.0185606	-0.178093	0.0139168	0.084292	-0.0381823	0.127465	0.153879	-0.00661908	-0.0719898	-0.117552	-0.162057	0.00755115	-0.0812021	-0.0512599	-0.0215491	-0.142358	-0.0345694					-0.0301014	0.112024	0.0238836
-7.55466	0.140919	-0.218902	-0.217497	0.032736	0.131851	0.00865278	-0.179576	-0.00133	0.0782052	-0.0412183	0.125149	0.149392	0.00208564	-0.0788681	-0.112304	-0.173308	0.0111178	-0.0745494	-0.0580624	-0.0180127	-0.109451	-0.0162031					-0.0281443	0.109694	0.0233869
-7.45636	0.130309	-0.203438	-0.224733	0.0569871	0.138674	-0.00143027	-0.180668	-0.0152632	0.0710689	-0.0422757	0.117534	0.143078	0.00858568	-0.0856394	-0.104545	-0.182101	0.0132944	-0.0674752	-0.0592514	-0.012132	-0.078806	-0.00178967					-0.0263644	0.107905	0.0230055
-7.35805	0.120775	-0.187988	-0.232299	0.0825028	0.142954	-0.0116186	-0.177953	-0.031593	0.0633733	-0.042984	0.106399	0.133396	0.0146831	-0.0890522	-0.0995342	-0.188428	0.0159322	-0.0591224	-0.0587764	-0.00642648	-0.0525178	0.00945565					-0.0249465	0.106359	0.0226759
-7.25975	0.113092	-0.172722	-0.239427	0.108142	0.144983	-0.0239982	-0.172718	-0.0468588	0.05591	-0.0450126	0.0926425	0.124058	0.0192463	-0.0912767	-0.0935834	-0.191257	0.0202207	-0.0487448	-0.0587619	0.00184408	-0.0262819	0.0227901					-0.0230779	0.105349	0.0224605
-7.16145	0.105504	-0.158206	-0.247182	0.135739	0.144533	-0.0353218	-0.165835	-0.0612226	0.047727	-0.04639	0.0803625	0.112977	0.0267259	-0.0870139	-0.0891393	-0.192704	0.0224689	-0.0407929	-0.0565087	0.0124947	-0.000281426	0.0395246					-0.02057	0.105283	0.0224465
-7.06314	0.097962	-0.141917	-0.254616	0.165166	0.144086	-0.0421997	-0.157007	-0.0726573	0.0399783	-0.0457675	0.0688028	0.100384	0.0361293	-0.0785235	-0.0856994	-0.195885	0.0268024	-0.0321706	-0.0527285	0.0263952	0.0307719	0.0554152					-0.0166945	0.106414	0.0226875
-6.96484	0.0908469	-0.124709	-0.261722	0.192876	0.142804	-0.0499642	-0.144731	-0.0842725	0.0326402	-0.0448917	0.0556399	0.0861414	0.0450076	-0.068248	-0.0828124	-0.198939	0.0308987	-0.022053	-0.0501349	0.040568	0.0691426	0.0694006					-0.0125687	0.108477	0.0231274
-6.86653	0.0818857	-0.108174	-0.268578	0.221389	0.142754	-0.0558252	-0.130808	-0.098836	0.0252568	-0.0439313	0.0402001	0.0712789	0.0481749	-0.0564447	-0.0782099	-0.199277	0.0384324	-0.0118717	-0.0475162	0.0548752	0.108301	0.0807308					-0.00846333	0.111618	0.0237969
-6.76823	0.0729204	-0.0922447	-0.273381	0.245972	0.142849	-0.0601101	-0.118077	-0.112255	0.0156667	-0.0402634	0.0231825	0.0582076	0.0495442	-0.0476226	-0.0737001	-0.197965	0.0455885	-0.00136965	-0.0423063	0.0679198	0.142911	0.0910374					-0.00470434	0.115103	0.0245401
-6.66993	0.0650204	-0.081902	-0.276823	0.266248	0.142904	-0.0640949	-0.105857	-0.125368	0.00691142	-0.0384887	0.00879286	0.046007	0.049234	-0.0409402	-0.0697551	-0.196046	0.0538321	0.00995104	-0.0377567	0.0802069	0.172592	0.106126					-0.00132757	0.119259	0.025426
-6.57162	0.0611741	-0.0705549	-0.280395	0.289052	0.143588	-0.0670554	-0.0925739	-0.13616	0.000498686	-0.0374728	-0.00226401	0.0365005	0.0470676	-0.0347133	-0.065764	-0.191693	0.060469	0.0234683	-0.0293959	0.0922678	0.198473	0.116297					0.00276426	0.123708	0.0263747
-6.47332	0.056339	-0.0631009	-0.27929	0.309703	0.143909	-0.0689225	-0.0774807	-0.144105	-0.00686492	-0.036525	-0.0114445	0.0275209	0.0439684	-0.0290248	-0.0598734	-0.186032	0.0638545	0.0371791	-0.0236225	0.106055	0.221044	0.12076					0.00654757	0.127263	0.0271325
-6.37501	0.0528623	-0.0565502	-0.275571	0.330065	0.141377	-0.0690474	-0.0624611	-0.149293	-0.0143819	-0.0341084	-0.0172177	0.0178464	0.0361387	-0.0242837	-0.0566067	-0.181869	0.0667377	0.0469107	-0.0166034	0.121953	0.239548	0.124198					0.00998377	0.130454	0.0278128
-6.27671	0.0514404	-0.048277	-0.275575	0.348448	0.137081	-0.0677199	-0.0483225	-0.153963	-0.0228581	-0.0296967	-0.023253	0.0068206	0.0261374	-0.0195158	-0.054995	-0.176985	0.0684037	0.0533952	-0.00953709	0.136443	0.253026	0.126285					0.0125811	0.133465	0.0284547
-6.17841	0.0498288	-0.042693	-0.273302	0.362403	0.135947	-0.0672221	-0.0333851	-0.154358	-0.0274087	-0.0252074	-0.031721	-0.00340346	0.0185118	-0.0165771	-0.0517449	-0.171951	0.0665221	0.0592654	-0.00147544	0.148631	0.254082	0.122613					0.0144252	0.134602	0.0286972
-6.0801	0.0499386	-0.0369366	-0.269286	0.372354	0.134079	-0.0668058	-0.0171846	-0.152978	-0.0286679	-0.0218968	-0.0440329	-0.0135788	0.0122038	-0.0153427	-0.0469604	-0.165699	0.0633494	0.0651585	0.00540147	0.156848	0.247801	0.121334					0.0158681	0.13452	0.0286798
-5.9818	0.0519811	-0.0287432	-0.262819	0.380867	0.131411	-0.0651458	-0.00100176	-0.151016	-0.0299267	-0.0179624	-0.0578478	-0.0214931	0.00252395	-0.01475	-0.0410632	-0.157316	0.0572918	0.0717367	0.0127416	0.165409	0.243485	0.117868					0.0175559	0.134167	0.0286044
-5.88349	0.0541943	-0.0214776	-0.255287	0.384484	0.126463	-0.0620518	0.0179516	-0.145656	-0.0307471	-0.0100621	-0.0732176	-0.0275958	-0.00966892	-0.013663	-0.0351324	-0.145546	0.0499484	0.0780345	0.0196258	0.176438	0.233852	0.114384					0.0193305	0.132681	0.0282878
-5.78519	0.0552101	-0.015998	-0.250116	0.383256	0.120913	-0.0566116	0.0357754	-0.136378	-0.0285748	-0.00192399	-0.0858026	-0.0339093	-0.022638	-0.0128518	-0.0277888	-0.132728	0.0401251	0.0831857	0.0299913	0.186754	0.229109	0.0989432					0.0208156	0.130716	0.0278687
-5.68689	0.0538368	-0.0114189	-0.246805	0.382896	0.116095	-0.0491931	0.0511753	-0.122935	-0.0262395	0.00534694	-0.0936617	-0.0388273	-0.0364185	-0.0107161	-0.0222258	-0.119171	0.0305165	0.0902197	0.0409751	0.193953	0.219414	0.0872369					0.022457	0.128689	0.0274366
-5.58858	0.0520433	-0.00761948	-0.242771	0.37667	0.11142	-0.0438903	0.0647898	-0.10708	-0.0270063	0.0123874	-0.0996521	-0.0388268	-0.0463621	-0.0100066	-0.0159405	-0.105049	0.0217618	0.0950887	0.0547483	0.204859	0.211712	0.0729298					0.0242821	0.126329	0.0269334
-5.49028	0.0529893	-0.00516538	-0.233624	0.367291	0.103505	-0.0359263	0.0786037	-0.0922261	-0.0267391	0.0190322	-0.10133	-0.0410596	-0.0534084	-0.00635364	-0.00767809	-0.0925378	0.0152124	0.0972663	0.0684133	0.213282	0.204559	0.0578855					0.0264541	0.123069	0.0262384
-5.39197	0.0539027	-0.00320047	-0.221934	0.356306	0.0964826	-0.0260224	0.0926558	-0.0755688	-0.0256366	0.026274	-0.098928	-0.0386933	-0.0580542	-0.00316464	-0.000736789	-0.0834795	0.00961447	0.100702	0.0739023	0.216465	0.198621	0.0482108					0.0289872	0.119131	0.0253988
-5.29367	0.0548984	0.000882732	-0.207778	0.342975	0.0914729	-0.0141723	0.102194	-0.0584023	-0.0278013	0.0306719	-0.094291	-0.0305791	-0.059215	-0.00365225	0.00694473	-0.0763089	0.00413494	0.104161	0.0793628	0.218987	0.193462	0.0403592					0.0317412	0.11465	0.0244435
-5.19537	0.0539589	0.00572579	-0.191236	0.32906	0.0848038	0.00243426	0.109509	-0.0441068	-0.0311404	0.0330763	-0.0834426	-0.022597	-0.0576996	-0.00758437	0.0132621	-0.0714567	-0.000224815	0.106534	0.0844357	0.215075	0.184458	0.0295076					0.0337433	0.10907	0.0232539
-5.09706	0.054541	0.0120395	-0.172346	0.313103	0.0777953	0.0217143	0.116522	-0.029192	-0.03356	0.0370552	-0.0703309	-0.0154782	-0.0569704	-0.0165555	0.0205594	-0.0687205	-0.00204223	0.108937	0.0866948	0.210184	0.171908	0.0196932					0.0357069	0.103048	0.0219699
-4.99876	0.0526749	0.0200307	-0.151408	0.292875	0.0689121	0.0383541	0.122332	-0.0155624	-0.035482	0.0373173	-0.0609438	-0.00903948	-0.0553196	-0.0277997	0.0273906	-0.0646406	-0.00949815	0.112098	0.0875225	0.203208	0.160821	0.0108545					0.0365771	0.0969231	0.0206641
-4.90045	0.0504074	0.0285454	-0.128527	0.27111	0.0608604	0.0543969	0.12332	2.50611e-05	-0.038037	0.0376951	-0.0516417	-0.00234332	-0.0530367	-0.0420318	0.0354498	-0.0596897	-0.0169762	0.114164	0.0894772	0.1959	0.141758	0.00619281					0.0371372	0.0903735	0.0192677
-4.80215	0.0503763	0.0375369	-0.105954	0.245329	0.0530149	0.069868	0.122384	0.0182827	-0.0400739	0.0390069	-0.0400702	0.00414781	-0.0463418	-0.0586053	0.041846	-0.0566853	-0.0262948	0.116285	0.0902136	0.187098	0.117061	0.00599587					0.0374737	0.0836288	0.0178297
-4.70385	0.0463992	0.0458337	-0.0842164	0.222017	0.0442828	0.0864934	0.123101	0.0348653	-0.0384663	0.0374034	-0.026384	0.0101101	-0.0366228	-0.0690187	0.0453322	-0.0560854	-0.0346765	0.11656	0.0902545	0.181281	0.0885226	0.00471553					0.0378046	0.0779409	0.0166171
-4.60554	0.0406529	0.0552341	-0.061428	0.201814	0.0369503	0.101212	0.12143	0.0506965	-0.0362181	0.0362773	-0.0139746	0.0151987	-0.0282378	-0.0784663	0.0477757	-0.0566929	-0.0407405	0.116361	0.0895876	0.174218	0.0637781	-0.00275776					0.0378486	0.0737849	0.015731
-4.50724	0.0345868	0.0613672	-0.0391005	0.1804	0.0287568	0.114789	0.118917	0.0657084	-0.0319471	0.0354774	-0.00350461	0.0192749	-0.0180911	-0.0856328	0.050049	-0.0563433	-0.0443259	0.114533	0.0852899	0.165992	0.037918	-0.00856255					0.0375251	0.0700463	0.0149339
-4.40893	0.0321769	0.0690933	-0.019189	0.160253	0.0205358	0.127363	0.115907	0.0791128	-0.0260955	0.0345258	0.00550947	0.0220805	-0.009032	-0.0884794	0.0510369	-0.0552363	-0.0448034	0.114229	0.0845251	0.155854	0.0117331	-0.00503555					0.0380029	0.067093	0.0143043
-4.31063	0.0312087	0.0751854	-0.00266845	0.140657	0.0156525	0.137311	0.110324	0.0910907	-0.0249217	0.034541	0.0142134	0.0241171	0.00327868	-0.0908923	0.0521137	-0.053849	-0.0456218	0.115097	0.083756	0.143151	-0.00949776	0.00204034					0.0384676	0.0649643	0.0138504
-4.21233	0.0285691	0.0771959	0.0173929	0.120528	0.011612	0.142926	0.102874	0.100561	-0.0234828	0.0330635	0.0201768	0.0248563	0.0180485	-0.0922833	0.0558889	-0.0542718	-0.047247	0.115859	0.0848434	0.130093	-0.0258708	0.00389484					0.0384194	0.063401	0.0135171
-4.11402	0.0278856	0.0791413	0.034732	0.101995	0.00614668	0.147045	0.0957051	0.106946	-0.0246101	0.0314251	0.0281872	0.0280714	0.0319028	-0.0935931	0.0581321	-0.0579032	-0.0452172	0.116104	0.0857598	0.116573	-0.0354764	0.00844437					0.038518	0.0624322	0.0133106
-4.01572	0.0243566	0.0810358	0.0489171	0.0867051	0.000365338	0.148938	0.0866012	0.111321	-0.0251863	0.0317434	0.0391163	0.0305441	0.0425536	-0.0940708	0.0580856	-0.0614487	-0.0431761	0.111341	0.0854192	0.107657	-0.0429015	0.0132288					0.0382339	0.0618147	0.0131789
-3.91741	0.0201878	0.0797867	0.0624322	0.0725911	-0.00871361	0.149107	0.0759077	0.113945	-0.0263437	0.0308202	0.0513651	0.0312871	0.0535846	-0.0934795	0.0573172	-0.0653407	-0.0420666	0.10623	0.0879612	0.0966293	-0.0499364	0.0186432					0.0373598	0.0616751	0.0131492
-3.81911	0.0153356	0.0788837	0.0755396	0.0603667	-0.0133907	0.146596	0.0636777	0.115153	-0.0304887	0.026903	0.061923	0.0300351	0.0639823	-0.0921682	0.0563603	-0.0684493	-0.0395552	0.0997515	0.0902179	0.0870387	-0.0504874	0.0199383					0.0362347	0.0613947	0.0130894
-3.72081	0.00973153	0.0774303	0.09035	0.0493109	-0.0163035	0.141229	0.0523143	0.116606	-0.0374674	0.0240823	0.068295	0.0279145	0.0748604	-0.091862	0.0561421	-0.0716934	-0.0349132	0.0920546	0.0874531	0.0787029	-0.0549874	0.0309228					0.0350079	0.0616237	0.0131382
-3.6225	0.00566718	0.0763219	0.105826	0.0373121	-0.0175688	0.133298	0.0422169	0.115245	-0.044567	0.0231814	0.0683097	0.027801	0.0854332	-0.0928297	0.0558791	-0.0751382	-0.0309659	0.0825609	0.0853038	0.0714092	-0.0613849	0.0317547					0.0329575	0.0622559	0.013273
-3.5242	0.000147541	0.0758672	0.121681	0.0273191	-0.0191438	0.12578	0.0332861	0.113421	-0.0495859	0.018811	0.0678956	0.0267731	0.0937163	-0.0945834	0.0557402	-0.0796995	-0.0282708	0.0708665	0.0815986	0.0607546	-0.0717028	0.029979					0.0300296	0.0636634	0.0135731
-3.42589	-0.00784251	0.0779197	0.131609	0.0189693	-0.0184745	0.11547	0.0246634	0.110563	-0.0525309	0.0142989	0.0653828	0.0289873	0.0998405	-0.100805	0.0505048	-0.0850141	-0.0272933	0.0643505	0.0761763	0.0526752	-0.0880804	0.0275183					0.026313	0.0657317	0.014014
-3.32759	-0.0184087	0.0820966	0.135214	0.00899096	-0.0164744	0.102908	0.0155274	0.104937	-0.0593628	0.00774959	0.0620375	0.027627	0.104549	-0.106153	0.0449119	-0.0886124	-0.0259762	0.0560138	0.0749206	0.0501346	-0.103887	0.0254627					0.0220094	0.067603	0.014413
-3.22929	-0.02925	0.0829557	0.135437	0.00152095	-0.0145548	0.0891527	0.00961281	0.10086	-0.0647915	0.00308708	0.0588412	0.0237679	0.106456	-0.108911	0.041208	-0.0917525	-0.0275236	0.0463193	0.0733288	0.0489158	-0.119077	0.0245421					0.0177339	0.0689498	0.0147001
-3.13098	-0.0420753	0.0827895	0.134645	-0.0057375	-0.00933456	0.0712758	0.0027052	0.0998505	-0.067049	0.0010554	0.0500921	0.0207348	0.105535	-0.107551	0.0378002	-0.0919392	-0.0313801	0.0363375	0.0718224	0.0500167	-0.131058	0.0259812					0.0138417	0.0692674	0.0147679
-3.03268	-0.0549736	0.0820401	0.130756	-0.0125498	-0.00237385	0.0510303	-0.00694825	0.0971275	-0.0690269	-0.00156439	0.0385657	0.0207859	0.10229	-0.105248	0.0358378	-0.0930148	-0.037204	0.0270325	0.0724242	0.0503452	-0.140313	0.0225675					0.00943574	0.0692148	0.0147566
-2.93437	-0.0645402	0.0765959	0.123126	-0.0163883	0.00744732	0.0316935	-0.0151346	0.0930913	-0.0725102	-0.000682922	0.0325809	0.0222672	0.0991423	-0.103475	0.0329028	-0.0926402	-0.0402354	0.0149197	0.0735405	0.0511514	-0.15269	0.015133					0.00524066	0.0691631	0.0147456
-2.83607	-0.0742154	0.0720819	0.111188	-0.0178971	0.0166599	0.0111193	-0.0206711	0.0868104	-0.076695	-0.000168799	0.0276673	0.0237459	0.0940327	-0.0962139	0.0298004	-0.0923576	-0.0446765	0.00211954	0.0747288	0.0512787	-0.160652	0.00429643					0.000999157	0.0682575	0.0145526
-2.73777	-0.0845626	0.0654311	0.0993821	-0.0163146	0.023865	-0.0119006	-0.0274516	0.0798696	-0.0825008	0.000416611	0.0209558	0.0253344	0.087636	-0.0868748	0.028951	-0.0922029	-0.0505604	-0.00954699	0.0765892	0.0523211	-0.162391	-0.0101254					-0.00334909	0.0672008	0.0143273
-2.63946	-0.0908931	0.060192	0.0883155	-0.0174962	0.035346	-0.0382131	-0.0357488	0.073501	-0.0900902	0.00210163	0.0138454	0.0256169	0.0783351	-0.0816172	0.0305092	-0.0891177	-0.0537107	-0.0172253	0.0775991	0.0514981	-0.157087	-0.0222601					-0.00711817	0.0660344	0.0140786
-2.54116	-0.0956453	0.0566312	0.0753787	-0.0189002	0.0450348	-0.0613768	-0.043569	0.0647402	-0.0976116	0.00419004	0.00708447	0.0251857	0.0720929	-0.0743656	0.0320688	-0.0859053	-0.0577787	-0.0231623	0.0771628	0.0498368	-0.153596	-0.028246					-0.0104886	0.0653407	0.0139307
-2.44285	-0.101716	0.0561977	0.0604216	-0.022262	0.0536385	-0.0835694	-0.0509887	0.0551126	-0.106398	0.00803173	-0.00154759	0.0233048	0.0602569	-0.0677455	0.0334445	-0.0851603	-0.0638031	-0.0265124	0.079468	0.0472811	-0.147736	-0.0370857					-0.0144258	0.0652331	0.0139077
-2.34455	-0.110378	0.056482	0.0463194	-0.02754	0.0639602	-0.105063	-0.0585665	0.0468382	-0.11507	0.0103501	-0.0106202	0.0198337	0.0491926	-0.067916	0.0332181	-0.0838581	-0.0720034	-0.030065	0.0792344	0.0454337	-0.142546	-0.0536125					-0.0193807	0.0665425	0.0141869
-2.24625	-0.120772	0.0581173	0.0333059	-0.0343528	0.072871	-0.123974	-0.0647452	0.0375504	-0.116865	0.011893	-0.0226253	0.0170579	0.0372398	-0.0681041	0.0339376	-0.0783575	-0.0792841	-0.0314177	0.0754842	0.0436553	-0.138771	-0.0736866					-0.0241747	0.0678098	0.0144571
-2.14794	-0.130203	0.0623344	0.0188623	-0.0373081	0.0828125	-0.137514	-0.0687506	0.0286114	-0.118924	0.0147354	-0.0341263	0.0142533	0.0242612	-0.0670844	0.0334211	-0.0708134	-0.0875755	-0.031427	0.0706409	0.0427265	-0.133748	-0.0879848					-0.0278545	0.0690457	0.0147206
-2.04964	-0.142275	0.0664445	0.00638952	-0.0386868	0.0919083	-0.149184	-0.0755553	0.0212137	-0.118131	0.0179811	-0.0487605	0.00802416	0.0105759	-0.068277	0.0351522	-0.058354	-0.0978543	-0.0311099	0.0656677	0.0422481	-0.128559	-0.104767					-0.0316322	0.0711342	0.0151659
-1.95133	-0.152232	0.066994	-0.00212318	-0.0412206	0.101235	-0.158107	-0.0808816	0.0146305	-0.116553	0.0183785	-0.0638199	0.00452796	-0.00292021	-0.0702793	0.0392647	-0.0473658	-0.110168	-0.0256522	0.0635501	0.0398008	-0.124915	-0.120528					-0.0349265	0.0738022	0.0157347
-1.85303	-0.16143	0.0709709	-0.0116418	-0.044546	0.114455	-0.164954	-0.0845907	0.00693416	-0.115253	0.0181608	-0.0784241	0.00170289	-0.0157246	-0.0723975	0.0446128	-0.0370746	-0.118087	-0.0180086	0.0585848	0.03854	-0.125879	-0.137306					-0.0377889	0.0774064	0.0165031
-1.75473	-0.1718	0.0759338	-0.024026	-0.0455177	0.123627	-0.167414	-0.0882401	-0.000834236	-0.111256	0.0182346	-0.0902942	-0.000331777	-0.0263926	-0.0755495	0.0490899	-0.0300186	-0.127423	-0.010498	0.0555169	0.0335728	-0.133992	-0.15401					-0.0409829	0.0811523	0.0173017
-1.65642	-0.178101	0.0814825	-0.0384726	-0.0436213	0.128175	-0.168325	-0.0935287	-0.0102028	-0.103685	0.0140817	-0.09872	-0.00024667	-0.0384072	-0.0774536	0.050383	-0.025905	-0.136756	-0.00114869	0.0545329	0.0273271	-0.14052	-0.177905					-0.0444098	0.0845214	0.01802
-1.55812	-0.181735	0.088444	-0.051847	-0.0400201	0.129468	-0.166962	-0.0995326	-0.0204621	-0.0972207	0.00873861	-0.101539	-0.00386296	-0.0496905	-0.0794498	0.0513281	-0.0208163	-0.144259	0.0108267	0.0528208	0.0213742	-0.13787	-0.187477					-0.0463519	0.0860415	0.0183441
-1.45981	-0.181039	0.0951389	-0.06619	-0.036761	0.130917	-0.165074	-0.106294	-0.0317295	-0.0932128	0.00917425	-0.102159	-0.010935	-0.0613797	-0.0790223	0.0514035	-0.0137797	-0.15428	0.0270586	0.0497543	0.0156686	-0.128103	-0.192233					-0.0474126	0.0872797	0.0186081
-1.36151	-0.177489	0.0991265	-0.0770849	-0.032201	0.131707	-0.160812	-0.113791	-0.0401276	-0.0931665	0.00840214	-0.102333	-0.018403	-0.071111	-0.0767083	0.0542512	-0.00500353	-0.164574	0.0405287	0.0465344	0.010255	-0.108988	-0.194866					-0.0475388	0.0880789	0.0187785
-1.26321	-0.171725	0.102016	-0.0803459	-0.0222288	0.131476	-0.155267	-0.118623	-0.0465405	-0.0872145	0.00593214	-0.102019	-0.0261386	-0.0795347	-0.0768952	0.0576189	0.00314966	-0.174984	0.0538651	0.0431256	0.00181173	-0.0920766	-0.202972					-0.0471623	0.0891638	0.0190098
-1.1649	-0.166051	0.107661	-0.0834876	-0.0164919	0.130595	-0.14903	-0.124617	-0.0551071	-0.0791695	0.00257345	-0.10205	-0.034554	-0.0885315	-0.0787571	0.0572072	0.0112948	-0.181237	0.0680838	0.0391604	-0.00770405	-0.073771	-0.208084					-0.0469122	0.0901918	0.019229
-1.0666	-0.158214	0.115298	-0.0879205	-0.0104996	0.126338	-0.142147	-0.12704	-0.0665844	-0.0738296	-0.00268013	-0.0992264	-0.0439442	-0.0952145	-0.0823242	0.05784	0.0183365	-0.184577	0.0786208	0.0356571	-0.0153724	-0.0551246	-0.215144					-0.0467159	0.0911382	0.0194307
-0.968294	-0.150476	0.122303	-0.0908178	-0.00360714	0.122037	-0.134309	-0.128487	-0.0759559	-0.0680061	-0.00674394	-0.0936351	-0.0566004	-0.0983968	-0.0847979	0.0564858	0.0269692	-0.186726	0.0881264	0.0295679	-0.0225469	-0.0345722	-0.214492					-0.0456673	0.0914133	0.0194894
-0.86999	-0.143493	0.136016	-0.0926735	0.00332602	0.115114	-0.126041	-0.130587	-0.0825143	-0.0588812	-0.0126934	-0.0892346	-0.0684378	-0.10544	-0.0830483	0.0537189	0.0353202	-0.187098	0.101271	0.0229437	-0.0286439	-0.016697	-0.207468					-0.0438746	0.0921195	0.0196399
-0.771686	-0.135062	0.149381	-0.0908296	0.0110276	0.108289	-0.115436	-0.133215	-0.0866981	-0.0483561	-0.0173465	-0.0851108	-0.0803884	-0.108645	-0.0846547	0.048017	0.043649	-0.185123	0.114737	0.0163208	-0.0342387	-0.0026978	-0.197328					-0.0415322	0.0925989	0.0197422
-0.673382	-0.125662	0.164908	-0.0886266	0.0197515	0.103717	-0.103405	-0.134467	-0.0905481	-0.0365167	-0.0244812	-0.0815053	-0.0915976	-0.112369	-0.0879694	0.0382185	0.050866	-0.178917	0.125349	0.00866997	-0.0377532	0.0121391	-0.186764					-0.0389528	0.0932278	0.0198762
-0.575078	-0.11575	0.178934	-0.0868322	0.0286621	0.0948904	-0.088068	-0.133418	-0.0927596	-0.0247209	-0.0331928	-0.0805151	-0.100425	-0.114848	-0.0904209	0.0292494	0.0566232	-0.175258	0.132152	0.000523257	-0.0402471	0.0250856	-0.178037					-0.0367442	0.0936806	0.0199728
-0.476774	-0.103519	0.19132	-0.0848826	0.0357082	0.0871392	-0.0738645	-0.130003	-0.0895075	-0.0124802	-0.0427934	-0.0796198	-0.105648	-0.119152	-0.0937025	0.0225152	0.0627586	-0.172586	0.136605	-0.00417179	-0.0403513	0.0391563	-0.172447					-0.0340694	0.0945082	0.0201492
-0.37847	-0.0900453	0.203494	-0.0800416	0.0450546	0.0817653	-0.0605531	-0.12749	-0.0834652	-0.00228902	-0.0539308	-0.0764148	-0.108129	-0.118083	-0.0958676	0.0165386	0.0695194	-0.169289	0.138501	-0.0102599	-0.0378552	0.0545483	-0.166937					-0.0305104	0.0953358	0.0203257
-0.280166	-0.0762117	0.217367	-0.0739085	0.0550331	0.0729175	-0.0500962	-0.122682	-0.0788041	0.0071252	-0.0647164	-0.0728064	-0.107051	-0.117759	-0.094615	0.0124812	0.0751458	-0.163385	0.137464	-0.0158602	-0.0329415	0.070627	-0.158113					-0.0263995	0.0957838	0.0204212
-0.181862	-0.0615022	0.232382	-0.0671106	0.0655409	0.0626763	-0.0403613	-0.114393	-0.0718676	0.012227	-0.0779644	-0.066371	-0.104862	-0.117465	-0.0937182	0.00958927	0.075373	-0.15648	0.133813	-0.0189879	-0.0274459	0.0870885	-0.147947					-0.0221721	0.0959493	0.0204565
-0.0835584	-0.0468067	0.245889	-0.0602903	0.0732525	0.0490705	-0.0321375	-0.104929	-0.0609962	0.0154272	-0.092829	-0.0575258	-0.101236	-0.117423	-0.0951899	0.0061922	0.0749182	-0.145599	0.129427	-0.020892	-0.0219563	0.102634	-0.134583					-0.0179811	0.0956177	0.0203858
0.0147456	-0.0290925	0.260919	-0.0534505	0.0800034	0.0353575	-0.0227447	-0.0919106	-0.0513393	0.017526	-0.108838	-0.0477594	-0.0964419	-0.116725	-0.0955396	0.00203329	0.071126	-0.134058	0.124872	-0.0230501	-0.0171337	0.116977	-0.116402					-0.0134396	0.0954018	0.0203397
0.11305	-0.0122937	0.278249	-0.0483621	0.0840269	0.0225249	-0.0113209	-0.0784823	-0.0428347	0.0196588	-0.122414	-0.0433959	-0.0923485	-0.117825	-0.0955003	-0.00259727	0.0671503	-0.119252	0.119908	-0.024055	-0.0100167	0.134537	-0.10125					-0.00890428	0.0964814	0.0205699
0.211354	0.00328945	0.293064	-0.039732	0.0902723	0.00945752	0.00274007	-0.0683306	-0.0333725	0.0241039	-0.134472	-0.0388644	-0.0881384	-0.118584	-0.0965128	-0.00815248	0.0637347	-0.106553	0.111402	-0.0223904	-0.00181797	0.160258	-0.0855961					-0.00382702	0.098606	0.0210229
0.309658	0.0224625	0.305331	-0.0280421	0.0928589	-0.00131157	0.0128362	-0.0582614	-0.025015	0.0274721	-0.145782	-0.0347079	-0.0849348	-0.118937	-0.0998914	-0.0126123	0.0614724	-0.0939468	0.102596	-0.021689	0.00893784	0.19244	-0.0634715					0.00171836	0.101514	0.021643
0.407962	0.0371529	0.316159	-0.0139463	0.0927027	-0.00742833	0.0236383	-0.0462501	-0.0178079	0.0262722	-0.153315	-0.031644	-0.0835867	-0.119523	-0.103792	-0.0145782	0.0632713	-0.0838643	0.093994	-0.01762	0.0201274	0.223797	-0.0330781					0.00775819	0.104684	0.0223187
0.506266	0.0477132	0.32572	-0.00287319	0.0918101	-0.0124476	0.0343764	-0.0322727	-0.0115575	0.0261431	-0.158359	-0.0309205	-0.0788133	-0.120672	-0.108224	-0.0184489	0.0642043	-0.0732886	0.083825	-0.0124781	0.0302366	0.249178	-0.00873713					0.0129143	0.10765	0.0229511
0.60457	0.0541382	0.334792	0.00842808	0.0925169	-0.0180145	0.0441503	-0.017071	-0.0064524	0.0300583	-0.168189	-0.0350113	-0.0710276	-0.122108	-0.116959	-0.0213056	0.0634344	-0.0593146	0.0708289	-0.00506395	0.0407242	0.2647	0.0118492					0.0170502	0.110539	0.0235669
0.702874	0.0581684	0.344293	0.0174243	0.0897836	-0.0241185	0.0508218	-0.00254419	-0.00362557	0.0375623	-0.175835	-0.0385763	-0.0637772	-0.125481	-0.124732	-0.0241914	0.0631477	-0.043006	0.0581391	0.00246936	0.0493886	0.267858	0.0281546					0.0200602	0.112531	0.0239918
0.801178	0.0656674	0.352044	0.0218173	0.080915	-0.0327994	0.0575935	0.00840037	-0.00237042	0.0423615	-0.180565	-0.0422808	-0.0574842	-0.131202	-0.130289	-0.0259097	0.0639147	-0.0264853	0.0451395	0.00927404	0.0594513	0.271645	0.0500132					0.022675	0.114716	0.0244576
0.899482	0.0751462	0.356554	0.0285215	0.0729472	-0.0424844	0.0625611	0.0200497	4.92892e-06	0.0448954	-0.18398	-0.0437285	-0.052406	-0.137761	-0.133329	-0.0253395	0.0632703	-0.0128387	0.0320937	0.0162356	0.0699392	0.271965	0.0627954					0.0247778	0.116328	0.0248012
0.997786	0.0856478	0.358096	0.0363411	0.0646271	-0.0496835	0.0677508	0.0284761	0.00427905	0.0477799	-0.185013	-0.0456567	-0.045215	-0.145371	-0.1365	-0.0262856	0.0608063	-0.00098778	0.024357	0.0218525	0.0798313	0.270014	0.0818689					0.027137	0.117667	0.0250867
1.09609	0.0949215	0.361829	0.0423017	0.0561845	-0.0595449	0.0739229	0.0394469	0.00439932	0.0486391	-0.189146	-0.051606	-0.035735	-0.15634	-0.13905	-0.0283224	0.0577242	0.0111776	0.0186401	0.0314813	0.0917109	0.267437	0.0943494					0.0288373	0.120125	0.0256107
1.19439	0.104672	0.359751	0.0492977	0.0470306	-0.0696666	0.0789897	0.0514609	0.00194259	0.0458239	-0.191206	-0.0573134	-0.0281249	-0.163407	-0.144008	-0.0271401	0.0530504	0.0226381	0.00979816	0.042362	0.10371	0.271261	0.100481					0.0300638	0.122371	0.0260896
1.2927	0.113816	0.356686	0.0551236	0.0343879	-0.0783279	0.082917	0.0651932	-0.00323448	0.0418286	-0.194147	-0.0637627	-0.0203691	-0.17572	-0.150408	-0.0220276	0.0473201	0.0338755	0.00246432	0.0507928	0.115003	0.280244	0.101514					0.0305986	0.125594	0.0267766
1.391	0.122973	0.353666	0.0607827	0.0180547	-0.0872996	0.0888227	0.0797148	-0.00892592	0.038191	-0.193461	-0.067112	-0.0140478	-0.189072	-0.155003	-0.0137638	0.0435115	0.0411617	-0.00113079	0.060738	0.123205	0.283339	0.104202					0.0312976	0.128234	0.0273395
1.48931	0.130464	0.352012	0.0667048	0.00339936	-0.0972327	0.0930592	0.0931431	-0.0177177	0.0353839	-0.190525	-0.0699609	-0.00823938	-0.202856	-0.159027	-0.00569212	0.0395432	0.04882	-0.00371133	0.0716345	0.128585	0.285262	0.1066					0.0318022	0.13101	0.0279314
1.58761	0.134284	0.350301	0.0737421	-0.0122172	-0.10876	0.0945718	0.10354	-0.0324311	0.0321843	-0.186947	-0.0745001	-0.00622407	-0.215774	-0.164099	-0.00166532	0.0380123	0.0573694	-0.00560709	0.0795231	0.131412	0.284539	0.107549					0.0308547	0.133805	0.0285273
1.68591	0.137202	0.347408	0.0789607	-0.0299105	-0.12201	0.0968827	0.115137	-0.0501337	0.0317898	-0.181725	-0.0776482	-0.00611765	-0.231052	-0.171487	0.000492472	0.0367514	0.0649752	-0.00724041	0.0875518	0.132817	0.27631	0.115589					0.0292974	0.136738	0.0291526
1.78422	0.140455	0.341147	0.0810378	-0.0472858	-0.129634	0.102474	0.122572	-0.0674998	0.030864	-0.174389	-0.0811859	-0.00828347	-0.246178	-0.1777	0.00167027	0.0350442	0.0692879	-0.00614386	0.0960085	0.13121	0.269168	0.124437					0.0275944	0.139103	0.0296568
1.88252	0.140739	0.330992	0.0825307	-0.0638542	-0.135142	0.108233	0.124868	-0.0875203	0.0316098	-0.164619	-0.0853789	-0.0133283	-0.260869	-0.18273	0.00110526	0.0348973	0.0717775	-0.00199988	0.105083	0.131225	0.257695	0.13373					0.0254111	0.14065	0.0299866
1.98083	0.139829	0.323485	0.0838105	-0.0785824	-0.136984	0.113846	0.125644	-0.111979	0.036791	-0.155427	-0.092305	-0.0181728	-0.275236	-0.18588	0.0010427	0.0342579	0.0700657	0.00181125	0.111307	0.130269	0.242179	0.142225					0.022818	0.14222	0.0303214
2.07913	0.136596	0.313825	0.0849482	-0.0939645	-0.138151	0.117946	0.125991	-0.134028	0.0414436	-0.145561	-0.0950529	-0.0231531	-0.290083	-0.188186	-0.000452241	0.0367691	0.0689726	0.00371209	0.119582	0.130551	0.227987	0.148644					0.020379	0.143727	0.0306428
2.17743	0.134219	0.304408	0.0855698	-0.102556	-0.139289	0.118346	0.125357	-0.156049	0.0450957	-0.136166	-0.0904423	-0.0288774	-0.29853	-0.190569	-0.00219684	0.0412992	0.0674304	0.00120933	0.122876	0.126663	0.212191	0.15556					0.0179795	0.144053	0.0307123
2.27574	0.132396	0.29502	0.0812078	-0.114282	-0.141533	0.112863	0.130969	-0.177721	0.0463691	-0.127575	-0.0873898	-0.036405	-0.307273	-0.19233	-0.00319059	0.0441182	0.0658494	0.00102817	0.122327	0.118937	0.188027	0.160526					0.014179	0.144069	0.0307155
2.37404	0.128439	0.286779	0.0770332	-0.121873	-0.143383	0.10891	0.136713	-0.197677	0.0503666	-0.117934	-0.0862062	-0.0425766	-0.318594	-0.190456	-0.00459422	0.0473995	0.066086	0.00423899	0.120655	0.111444	0.155606	0.158025					0.0103818	0.143594	0.0306143
2.47235	0.126765	0.27909	0.071035	-0.128867	-0.144986	0.103974	0.1424	-0.216743	0.0595889	-0.106571	-0.0833129	-0.0463965	-0.327455	-0.187408	-0.00647011	0.047407	0.0692663	0.00424579	0.113453	0.103872	0.124189	0.149802					0.00667629	0.142813	0.0304477
2.57065	0.126693	0.273179	0.066437	-0.136388	-0.147473	0.0962906	0.146846	-0.232472	0.0688422	-0.0985036	-0.0788211	-0.0528446	-0.336184	-0.182018	-0.0050673	0.0459579	0.0717994	0.00316655	0.103881	0.0969465	0.0940794	0.138578					0.00286025	0.142268	0.0303317
2.66895	0.127684	0.265487	0.0613792	-0.145644	-0.149376	0.0896091	0.149204	-0.246753	0.0720415	-0.0884277	-0.071742	-0.0600001	-0.341155	-0.17206	-0.00389086	0.0441273	0.0742096	0.00146357	0.0924838	0.0911183	0.0719756	0.130218					-0.000365832	0.141336	0.0301329
2.76726	0.128434	0.257654	0.0590808	-0.154872	-0.149704	0.0855204	0.152052	-0.258649	0.0733331	-0.0797535	-0.0655031	-0.0674369	-0.344381	-0.161412	-0.00407339	0.0400188	0.0738139	0.000104981	0.0797711	0.084837	0.0597324	0.124676					-0.00303432	0.140594	0.0299747
2.86556	0.123039	0.251527	0.0555589	-0.161349	-0.146819	0.0847906	0.155995	-0.270666	0.0734448	-0.0694459	-0.0581021	-0.0720746	-0.346096	-0.147881	-0.00647619	0.0353203	0.0746373	-0.000437487	0.0677618	0.0776495	0.0508254	0.115546					-0.00514785	0.139339	0.0297071
2.96387	0.114973	0.247305	0.0489377	-0.163153	-0.143074	0.0852409	0.159093	-0.281392	0.0761573	-0.0578637	-0.055021	-0.0738085	-0.34557	-0.135392	-0.00834757	0.0338726	0.0758111	-0.00234626	0.0555796	0.0685287	0.044408	0.112098					-0.00654381	0.138062	0.0294349
3.06217	0.105416	0.244114	0.0404911	-0.165347	-0.140513	0.0863625	0.161889	-0.292075	0.0805651	-0.0473829	-0.0493643	-0.0793932	-0.346408	-0.122441	-0.0119771	0.0342121	0.075935	-0.00685072	0.0444921	0.0578393	0.0391992	0.10103					-0.00864573	0.137083	0.0292262
3.16047	0.0962563	0.235538	0.0332822	-0.169123	-0.134635	0.0876964	0.161378	-0.297743	0.0866091	-0.0344353	-0.0388632	-0.0851264	-0.343979	-0.109437	-0.0133872	0.0361734	0.0752175	-0.0122358	0.0326847	0.044868	0.0269757	0.0946653					-0.0103464	0.13491	0.028763
3.25878	0.0864247	0.227145	0.0233173	-0.175095	-0.126561	0.0902541	0.15868	-0.302307	0.0926055	-0.0233849	-0.0308934	-0.0914848	-0.342133	-0.0965937	-0.0161751	0.0391339	0.0730657	-0.0150416	0.019514	0.0296611	0.0105891	0.0911251					-0.0126433	0.133032	0.0283626
3.35708	0.0748171	0.217682	0.013481	-0.180011	-0.12025	0.0942047	0.15368	-0.304759	0.0993554	-0.0132463	-0.0241176	-0.0954582	-0.335661	-0.082055	-0.0222954	0.0410816	0.0697812	-0.0186147	0.0117034	0.0158961	-0.00735997	0.0955556					-0.0143905	0.130899	0.0279078
3.45539	0.0608265	0.20576	0.00173835	-0.182049	-0.114542	0.0958882	0.148208	-0.305514	0.105616	-0.00647962	-0.0186834	-0.0985298	-0.324826	-0.0674651	-0.0287624	0.0424139	0.0691951	-0.0239489	0.00421425	0.00540113	-0.0190203	0.0998385					-0.0159419	0.128079	0.0273065
3.55369	0.0479842	0.193827	-0.0129573	-0.185187	-0.104957	0.0983753	0.141729	-0.302231	0.110891	0.000544175	-0.00866253	-0.104189	-0.3132	-0.0523375	-0.0364988	0.0453696	0.0677016	-0.0298349	-0.00254519	-0.0035989	-0.0310399	0.104215					-0.0171183	0.125187	0.02669
3.65199	0.0362422	0.182572	-0.0298799	-0.184254	-0.0920707	0.103119	0.136305	-0.293631	0.115353	0.00807967	0.00608164	-0.107793	-0.301644	-0.0375108	-0.0406488	0.0447773	0.0653284	-0.036151	-0.0103777	-0.0104884	-0.0390785	0.110252					-0.0170644	0.122019	0.0260144
3.7503	0.0218344	0.168797	-0.045731	-0.180527	-0.0783007	0.107385	0.130478	-0.283753	0.118391	0.0129625	0.0188767	-0.111956	-0.288545	-0.0204028	-0.0418919	0.0453204	0.063238	-0.0410767	-0.0170718	-0.0197399	-0.0412764	0.107456					-0.0170697	0.118056	0.0251697
3.8486	0.0062963	0.156142	-0.0593673	-0.178459	-0.0686751	0.11138	0.126472	-0.273277	0.121574	0.0172085	0.0302427	-0.114009	-0.274818	-0.00407642	-0.0427133	0.0474624	0.0637047	-0.0452635	-0.0244192	-0.026918	-0.045467	0.101195					-0.0170811	0.114716	0.0244575
3.94691	-0.00667592	0.144937	-0.0735296	-0.177072	-0.0609155	0.113072	0.125367	-0.260572	0.123278	0.0208496	0.0390432	-0.112674	-0.262323	0.00889779	-0.0431956	0.0492423	0.0663511	-0.0522216	-0.0311098	-0.0360144	-0.0440139	0.089667					-0.0172551	0.111555	0.0237836
4.04521	-0.0186156	0.13099	-0.0890231	-0.176759	-0.056115	0.114002	0.124361	-0.245065	0.121283	0.0274393	0.0485445	-0.111923	-0.250558	0.0192644	-0.0447631	0.0504244	0.0725649	-0.0578029	-0.0362618	-0.0447646	-0.0408412	0.0730377					-0.0177537	0.108372	0.023105
4.14351	-0.0311586	0.117936	-0.106017	-0.17497	-0.0507092	0.113196	0.120874	-0.230357	0.117509	0.0355968	0.0547473	-0.109948	-0.239604	0.0296364	-0.044414	0.0484928	0.0784039	-0.0607773	-0.0436584	-0.0534451	-0.03988	0.0533565					-0.0188723	0.105264	0.0224424
4.24182	-0.043438	0.103873	-0.12173	-0.179285	-0.0436856	0.112927	0.118119	-0.214124	0.111166	0.0417835	0.0578661	-0.107905	-0.232372	0.0410685	-0.0443865	0.0449134	0.0831523	-0.0588538	-0.0466824	-0.0598177	-0.0416651	0.0379061					-0.0200533	0.102985	0.0219564
4.34012	-0.0573986	0.0896882	-0.133374	-0.180871	-0.0360435	0.115687	0.108905	-0.198184	0.106717	0.0495954	0.0614097	-0.104124	-0.224859	0.0539227	-0.0441233	0.0450027	0.0868009	-0.0566409	-0.0456511	-0.0620811	-0.0397043	0.025951					-0.0199716	0.100842	0.0214995
4.43843	-0.073307	0.0755321	-0.148864	-0.185005	-0.0295287	0.118248	0.100344	-0.182959	0.0971066	0.0574298	0.0660653	-0.101301	-0.217371	0.0650815	-0.0444041	0.0441335	0.0882828	-0.0581688	-0.0432948	-0.0653421	-0.034354	0.0188851					-0.0205814	0.0995815	0.0212309
4.53673	-0.0884302	0.0618564	-0.163702	-0.190313	-0.0267803	0.120926	0.0903902	-0.163836	0.0847682	0.0616509	0.0670907	-0.100288	-0.211565	0.074536	-0.0467549	0.0441509	0.0884805	-0.0571281	-0.0386974	-0.069349	-0.0303421	0.0151628					-0.0217352	0.0984353	0.0209865
4.63503	-0.103167	0.0453313	-0.17862	-0.194656	-0.0229993	0.126818	0.0786907	-0.145732	0.0738205	0.0666963	0.0678496	-0.0995509	-0.205146	0.0812135	-0.0518559	0.0474003	0.086855	-0.054848	-0.0319318	-0.0733071	-0.0269212	0.01374					-0.0227418	0.0979437	0.0208817
4.73334	-0.117931	0.0317522	-0.192097	-0.197549	-0.0191647	0.132289	0.0692193	-0.124915	0.0691452	0.0718296	0.0712384	-0.0971509	-0.202075	0.0859296	-0.0578211	0.0514885	0.0852734	-0.0508042	-0.0247056	-0.0786929	-0.0266767	0.00854131					-0.0233126	0.0984553	0.0209907
4.83164	-0.132063	0.0169961	-0.205808	-0.197271	-0.0175377	0.135585	0.0601438	-0.107244	0.0666691	0.077614	0.0768589	-0.0939144	-0.199922	0.0876156	-0.0618059	0.0585832	0.0852097	-0.046628	-0.0130073	-0.0823944	-0.0287766	0.00240166					-0.023577	0.0995221	0.0212182
4.92995	-0.144361	0.00145148	-0.217619	-0.195443	-0.0153851	0.133674	0.0495067	-0.0890391	0.0665667	0.0810693	0.0788869	-0.0913793	-0.197211	0.0849215	-0.064443	0.0657801	0.0826334	-0.04404	-0.00527908	-0.0869425	-0.0341031	-0.00159407					-0.0246522	0.0998164	0.0212809
5.02825	-0.155397	-0.0150367	-0.228403	-0.197889	-0.0095439	0.13226	0.0377183	-0.075012	0.0629136	0.0805725	0.0832314	-0.0902405	-0.195269	0.0793159	-0.0688595	0.0715044	0.0799533	-0.039716	0.0041843	-0.0881833	-0.0403694	-0.00323533					-0.0261591	0.100562	0.0214399
5.12655	-0.167121	-0.029693	-0.23853	-0.199026	-0.0017948	0.129809	0.0271338	-0.0635137	0.0574928	0.0783075	0.0824366	-0.085691	-0.191025	0.0730416	-0.0727827	0.0761557	0.080176	-0.0334255	0.014524	-0.086372	-0.0433417	-0.0019736					-0.0270551	0.101003	0.021534
5.22486	-0.177304	-0.0406849	-0.246568	-0.198476	0.00503667	0.123868	0.0163856	-0.0534737	0.0529105	0.0760711	0.0762023	-0.0814021	-0.189548	0.0640509	-0.0782824	0.078968	0.0805546	-0.0268211	0.024045	-0.0833204	-0.0368512	-0.00222016					-0.028039	0.100902	0.0215124
5.32316	-0.187361	-0.0493627	-0.250665	-0.193759	0.0132902	0.116729	0.00641496	-0.0411726	0.0504164	0.0776749	0.0740648	-0.0736938	-0.188471	0.0518823	-0.0830042	0.0831656	0.0798459	-0.0238305	0.032281	-0.0773238	-0.0299613	0.000185378					-0.0278479	0.100627	0.0214537
5.42147	-0.19353	-0.0565158	-0.256676	-0.184798	0.0230413	0.107083	-0.00184138	-0.0282395	0.0492244	0.0804312	0.0759421	-0.0684983	-0.187682	0.0398128	-0.0849001	0.0897973	0.0793992	-0.0220279	0.0368581	-0.0716603	-0.0216826	-0.00489269					-0.0273343	0.10051	0.0214289
5.51977	-0.197718	-0.0619196	-0.258947	-0.174564	0.0332286	0.0976457	-0.0119156	-0.0165541	0.0475474	0.0846262	0.0781626	-0.0639391	-0.192154	0.0259112	-0.0875702	0.0957677	0.075974	-0.0222433	0.0429527	-0.0683845	-0.0174479	-0.00786873					-0.0272459	0.100541	0.0214353
5.61807	-0.202878	-0.0704002	-0.257116	-0.162872	0.0404681	0.0876261	-0.0204726	-0.00652913	0.0454366	0.0875279	0.0785912	-0.0565506	-0.197685	0.0121414	-0.0904083	0.100623	0.0728801	-0.021082	0.0489564	-0.0644049	-0.00716999	-0.0110381					-0.0270162	0.100357	0.0213961
5.71638	-0.20695	-0.0805619	-0.25449	-0.151358	0.0447962	0.0770685	-0.0277914	0.00214717	0.0424797	0.0899199	0.073681	-0.0497033	-0.205214	-0.00081033	-0.0965505	0.105662	0.0702502	-0.0175335	0.0593348	-0.060979	-0.00272515	-0.01328					-0.0273912	0.100513	0.0214295
5.81468	-0.207477	-0.0866142	-0.250924	-0.139978	0.0503797	0.0672576	-0.0353019	0.0123098	0.040124	0.0946228	0.0676142	-0.0408605	-0.214507	-0.0151285	-0.103346	0.108652	0.0703619	-0.0148755	0.0671474	-0.0512678	0.0038712	-0.00899578					-0.0266789	0.10087	0.0215055
5.91299	-0.207139	-0.0939088	-0.247465	-0.124443	0.0593908	0.0569177	-0.0420123	0.0220276	0.0387362	0.0972443	0.0662317	-0.032303	-0.223206	-0.0323298	-0.108707	0.110365	0.0699302	-0.0153045	0.0738145	-0.0435027	0.0125205	0.00186754					-0.0255125	0.101584	0.0216578
6.01129	-0.20577	-0.099211	-0.243593	-0.108962	0.070545	0.0498338	-0.0490799	0.0316682	0.0393725	0.09921	0.0695705	-0.0273476	-0.231229	-0.0468918	-0.114098	0.112892	0.0649073	-0.0161251	0.0774439	-0.0368037	0.0169222	0.0183431					-0.0240183	0.102787	0.0219142
6.10959	-0.203548	-0.102139	-0.238428	-0.0957782	0.084785	0.0438198	-0.056576	0.0404894	0.0423944	0.0989264	0.0752516	-0.0241771	-0.237586	-0.0599039	-0.116258	0.115716	0.0570013	-0.0184937	0.0818971	-0.0289304	0.0252014	0.0381116					-0.0217374	0.104323	0.0222418
6.2079	-0.197896	-0.105966	-0.234713	-0.0830232	0.0986769	0.0405159	-0.0635889	0.0468529	0.049628	0.0970199	0.0809624	-0.0219161	-0.241678	-0.0732214	-0.119926	0.11928	0.0481384	-0.0223595	0.0857036	-0.0220099	0.0393041	0.0620122					-0.0190093	0.106466	0.0226986
6.3062	-0.190884	-0.10969	-0.230915	-0.0692993	0.108418	0.0404805	-0.0715599	0.0528917	0.0614478	0.0980576	0.0873228	-0.0188928	-0.246523	-0.086909	-0.124967	0.123405	0.040808	-0.0280303	0.0863904	-0.0152612	0.0619983	0.0789665					-0.0160339	0.109341	0.0233116
6.40451	-0.181659	-0.112255	-0.228674	-0.0575365	0.117769	0.0409422	-0.0738067	0.0613948	0.0721849	0.0972646	0.0962278	-0.014096	-0.253557	-0.104459	-0.131567	0.123517	0.0348398	-0.0366404	0.0824604	-0.00891725	0.0834686	0.0963857					-0.0134869	0.112726	0.0240332
6.50281	-0.170866	-0.114425	-0.22133	-0.0453987	0.127735	0.041214	-0.0768214	0.0708418	0.0860739	0.0948766	0.104292	-0.0069801	-0.257809	-0.121159	-0.137358	0.123348	0.0324224	-0.0434741	0.0795727	-0.0029546	0.107284	0.111945					-0.0099531	0.115989	0.024729
6.60111	-0.163411	-0.117459	-0.214063	-0.0306103	0.141507	0.0410788	-0.0780274	0.0753809	0.0995558	0.0929247	0.115497	0.000412301	-0.261085	-0.136405	-0.139682	0.122067	0.0287102	-0.0502772	0.0766688	0.00382181	0.135203	0.125123					-0.00604862	0.119884	0.0255593
6.69942	-0.155272	-0.121793	-0.205633	-0.0159215	0.15482	0.0404135	-0.0772858	0.0810028	0.109787	0.0904279	0.124188	0.0111211	-0.265428	-0.148756	-0.138664	0.118053	0.026818	-0.0557267	0.0738931	0.0112288	0.165654	0.140116					-0.00167998	0.12387	0.0264091
6.79772	-0.145421	-0.129338	-0.197896	-0.00200731	0.167761	0.0397764	-0.0782941	0.0810034	0.115527	0.0883632	0.131028	0.0171542	-0.268783	-0.161108	-0.136879	0.115105	0.0235072	-0.0630513	0.0729423	0.0200034	0.198167	0.157795					0.00206163	0.128379	0.0273706
6.89603	-0.134635	-0.135831	-0.191398	0.0115326	0.182303	0.0402862	-0.0793789	0.0829255	0.118329	0.0872314	0.133955	0.0221081	-0.272728	-0.17443	-0.135996	0.108555	0.0213705	-0.0699077	0.0674521	0.0291451	0.233845	0.177837					0.00557138	0.133634	0.0284908
6.99433	-0.122353	-0.142241	-0.183917	0.0238809	0.1952	0.043003	-0.0781076	0.0861679	0.119919	0.086823	0.139709	0.0263952	-0.278649	-0.18621	-0.136414	0.102567	0.0209249	-0.0756886	0.0669792	0.0400163	0.272458	0.194683					0.00977936	0.139633	0.0297699
7.09263	-0.111344	-0.145711	-0.175021	0.0384794	0.202815	0.0446946	-0.0741187	0.0921427	0.124912	0.091356	0.144229	0.0299991	-0.284444	-0.193464	-0.135083	0.0954814	0.0229214	-0.0823991	0.0640773	0.0486885	0.314506	0.207538					0.014557	0.145434	0.0310067
7.19094	-0.0978518	-0.151954	-0.166356	0.050712	0.209091	0.0475415	-0.070117	0.101028	0.131945	0.0967916	0.149186	0.0313673	-0.2922	-0.200955	-0.128008	0.0882018	0.0209582	-0.0903997	0.0592275	0.0560485	0.348571	0.219815					0.0187565	0.150952	0.032183
7.28924	-0.0859792	-0.159515	-0.159729	0.0604281	0.215982	0.0523769	-0.0632849	0.109742	0.137452	0.100638	0.158158	0.0306714	-0.298394	-0.207865	-0.118366	0.0810011	0.0193363	-0.0986095	0.053502	0.062048	0.379662	0.22472					0.0224534	0.15603	0.0332657
7.38755	-0.0743852	-0.168367	-0.155395	0.0671883	0.220998	0.0586311	-0.0567594	0.114939	0.14253	0.0975902	0.162675	0.0276089	-0.30685	-0.209948	-0.10796	0.070286	0.0228396	-0.103576	0.0500068	0.0664047	0.410925	0.225767					0.025234	0.160557	0.0342309
7.48585	-0.0651694	-0.176989	-0.146516	0.0680739	0.22441	0.0678906	-0.0521351	0.119807	0.143085	0.0922827	0.163011	0.0251602	-0.321106	-0.213323	-0.0980942	0.0574174	0.0265357	-0.108634	0.0473543	0.0706574	0.438391	0.226885					0.0267726	0.165018	0.0351819
7.58415	-0.0554365	-0.184216	-0.140232	0.0654035	0.226139	0.0792489	-0.0461678	0.124044	0.144151	0.0881929	0.161487	0.0248212	-0.334483	-0.214176	-0.088754	0.0459728	0.0329065	-0.110296	0.0423411	0.0748621	0.46706	0.221957					0.0284012	0.169114	0.0360553
7.68246	-0.0439293	-0.189885	-0.136126	0.0611547	0.23017	0.0909907	-0.0427123	0.126236	0.147081	0.0862082	0.155997	0.0226416	-0.347212	-0.216525	-0.077007	0.0336477	0.0395516	-0.111879	0.0350058	0.0804613	0.4868	0.218328					0.0294999	0.172543	0.0367863
7.78076	-0.0316882	-0.19482	-0.129191	0.0540576	0.233799	0.102473	-0.0405584	0.125675	0.152356	0.0829671	0.152902	0.0198945	-0.35915	-0.220252	-0.0618156	0.022782	0.0465149	-0.116796	0.0253026	0.0856446	0.514721	0.213667					0.0308402	0.17714	0.0377664
7.87907	-0.0193603	-0.202036	-0.122945	0.0467218	0.235467	0.112986	-0.0395766	0.122479	0.155618	0.0794782	0.15135	0.0182427	-0.370816	-0.224161	-0.0497284	0.0127763	0.0508689	-0.120156	0.0190843	0.0846002	0.540172	0.206013					0.0312308	0.181502	0.0386964
7.97737	-0.00686404	-0.208236	-0.119481	0.0374597	0.232842	0.123726	-0.0429623	0.119801	0.158402	0.0768001	0.145532	0.0146213	-0.38631	-0.227069	-0.0399693	0.00372973	0.0534476	-0.121834	0.0159011	0.0855051	0.562937	0.187997					0.0302716	0.18549	0.0395466
8.07567	0.00442357	-0.2169	-0.114988	0.0283874	0.228553	0.13353	-0.04796	0.115479	0.160263	0.0747414	0.137451	0.0146596	-0.401508	-0.228923	-0.0287702	-0.00425922	0.0608605	-0.122737	0.0158765	0.0882243	0.582415	0.167903					0.0293965	0.189116	0.0403196
8.17398	0.0172717	-0.229811	-0.108368	0.0222142	0.220287	0.141331	-0.0538056	0.110984	0.159809	0.07444	0.127518	0.0171871	-0.417913	-0.227858	-0.0200455	-0.00989981	0.0693482	-0.121967	0.016558	0.0895749	0.597803	0.14409					0.0281249	0.192174	0.0409717
8.27228	0.028818	-0.239835	-0.097795	0.0167774	0.209033	0.147893	-0.0592698	0.108107	0.154752	0.0737245	0.118442	0.0179418	-0.434629	-0.227298	-0.0116916	-0.0143387	0.0782	-0.119774	0.0214883	0.0911354	0.607026	0.117885					0.0266632	0.194185	0.0414004
8.37059	0.0368232	-0.247507	-0.0873581	0.0128494	0.200354	0.152524	-0.0645018	0.104537	0.145007	0.0727921	0.109456	0.0162666	-0.451164	-0.227317	-0.00268468	-0.0203639	0.0865088	-0.116433	0.0293692	0.092238	0.608746	0.0961218					0.0248302	0.195376	0.0416543
8.46889	0.0444909	-0.25559	-0.0777891	0.0114832	0.19242	0.154738	-0.0730904	0.0983546	0.134741	0.0728729	0.096135	0.0121651	-0.467103	-0.223748	0.0076422	-0.0228215	0.0955908	-0.111442	0.0420443	0.0927102	0.612151	0.0689323					0.0229494	0.196673	0.0419309
8.56719	0.0534132	-0.264904	-0.0709366	0.00982083	0.183405	0.15688	-0.0814846	0.0904694	0.126503	0.0726551	0.085984	0.00517464	-0.484036	-0.220571	0.0201208	-0.0239479	0.101478	-0.109439	0.0548609	0.0928937	0.614482	0.0420641					0.0206766	0.198599	0.0423415
8.6655	0.065124	-0.273004	-0.0642308	0.00533855	0.172905	0.159178	-0.0912541	0.0842143	0.120109	0.0730069	0.0755308	-0.00161576	-0.501155	-0.218136	0.0304496	-0.0227273	0.111445	-0.108393	0.0703362	0.0933368	0.612708	0.0127974					0.018453	0.200583	0.0427644
8.7638	0.0734395	-0.277151	-0.0575831	0.000938376	0.16327	0.158148	-0.100327	0.0749203	0.116506	0.0755663	0.0666902	-0.0102005	-0.517608	-0.216942	0.0388768	-0.020475	0.119331	-0.111092	0.0844664	0.0937687	0.609163	-0.0191061					0.0156636	0.202504	0.043174
8.86211	0.079541	-0.280364	-0.0518511	-0.00286216	0.154687	0.156581	-0.108058	0.06819	0.115536	0.0775954	0.0572174	-0.0138331	-0.534852	-0.216046	0.0474931	-0.0205378	0.127551	-0.112179	0.0963309	0.0917412	0.603047	-0.0507342					0.0129179	0.20447	0.0435931
8.96041	0.0863217	-0.284321	-0.0442229	-0.00855674	0.146136	0.155279	-0.115342	0.0617202	0.117319	0.0784711	0.0506661	-0.0165302	-0.552953	-0.211729	0.0571945	-0.0200328	0.132287	-0.115135	0.108516	0.0896458	0.592141	-0.0865413					0.0100152	0.20631	0.0439854
9.05871	0.0916142	-0.28775	-0.0368737	-0.0158177	0.136515	0.15332	-0.123235	0.0528372	0.120925	0.0776474	0.042313	-0.0185449	-0.569516	-0.208969	0.0681761	-0.0221682	0.134824	-0.117824	0.11715	0.0859445	0.577774	-0.119132					0.00632768	0.207712	0.0442843
9.15702	0.0967343	-0.29475	-0.0307737	-0.0237015	0.12802	0.152372	-0.133161	0.0451403	0.122798	0.0736452	0.0364394	-0.0200238	-0.585505	-0.20843	0.0774138	-0.0236187	0.133126	-0.119776	0.126418	0.0833711	0.55861	-0.148638					0.00207775	0.209024	0.0445641
9.25532	0.0995383	-0.297985	-0.0215453	-0.0288381	0.121158	0.15077	-0.142358	0.0367525	0.121573	0.0701456	0.0353206	-0.0200502	-0.599748	-0.205057	0.0814318	-0.0242919	0.134141	-0.121879	0.137025	0.0809084	0.543534	-0.174913					-0.00110762	0.210358	0.0448485
9.35363	0.105724	-0.298767	-0.0120022	-0.0312825	0.112234	0.149606	-0.150974	0.0259339	0.119391	0.067685	0.0313781	-0.0173047	-0.613537	-0.19924	0.0833455	-0.024347	0.135003	-0.124471	0.147188	0.0784141	0.525345	-0.195329					-0.00390946	0.210964	0.0449776
9.45193	0.110673	-0.298508	-0.0023365	-0.0339971	0.102521	0.147276	-0.156748	0.0157994	0.118006	0.0712851	0.0293367	-0.0130543	-0.624198	-0.196096	0.0822404	-0.0206813	0.130763	-0.126331	0.15831	0.075309	0.507361	-0.214795					-0.00626651	0.2112	0.0450281
9.55023	0.114791	-0.299597	0.00398664	-0.0340792	0.0924033	0.143365	-0.159774	0.00325059	0.119911	0.0780269	0.0316495	-0.00765289	-0.628188	-0.189153	0.0787314	-0.015427	0.127128	-0.125623	0.166709	0.0713692	0.490865	-0.23226					-0.00770765	0.210575	0.0448947
9.64854	0.116983	-0.303303	0.0109839	-0.0317927	0.0845613	0.138229	-0.160939	-0.00779028	0.12177	0.0847293	0.0367418	-0.00418143	-0.626973	-0.185555	0.0775907	-0.0107465	0.122062	-0.126469	0.174891	0.0692635	0.470559	-0.24863					-0.00900072	0.209307	0.0446243
9.74684	0.115533	-0.306337	0.0195601	-0.027258	0.074579	0.132809	-0.160013	-0.0182792	0.123681	0.0879119	0.0462378	0.0011938	-0.625488	-0.180557	0.0733285	-0.00505972	0.117259	-0.128865	0.185685	0.062989	0.45465	-0.264896					-0.0100607	0.208382	0.0444272
9.84515	0.110878	-0.308515	0.0253029	-0.0207507	0.0656973	0.12939	-0.157301	-0.026011	0.123241	0.0913014	0.0571145	0.0064071	-0.622926	-0.173559	0.0655975	2.78213e-05	0.112068	-0.129666	0.196794	0.0584131	0.434703	-0.283226					-0.0111372	0.206957	0.0441233
9.94345	0.106069	-0.309036	0.0296053	-0.0165333	0.057238	0.127138	-0.150314	-0.033924	0.125939	0.0942611	0.0701542	0.00823505	-0.615636	-0.165637	0.0604195	0.00775419	0.106529	-0.132842	0.20523	0.0583265	0.414332	-0.301928					-0.0115736	0.205092	0.0437257
10.0418	0.101145	-0.307999	0.0372549	-0.0144301	0.051183	0.124611	-0.137484	-0.0420556	0.1299	0.101037	0.085322	0.0112056	-0.602943	-0.15311	0.0575025	0.0162454	0.103334	-0.137251	0.210652	0.0570257	0.398561	-0.310535					-0.0100377	0.202345	0.0431401
10.1401	0.0963263	-0.304259	0.0426361	-0.0117626	0.045334	0.121694	-0.122029	-0.0472326	0.135106	0.109058	0.10116	0.0120817	-0.59001	-0.141563	0.0526135	0.0230289	0.09982	-0.140915	0.216476	0.0558048	0.390629	-0.316548					-0.00784317	0.200115	0.0426646
10.2384	0.0867532	-0.296673	0.0454362	-0.00715816	0.0423041	0.120077	-0.105266	-0.0531747	0.14185	0.113696	0.116314	0.0117161	-0.576823	-0.134115	0.0457837	0.0264355	0.096911	-0.145246	0.216897	0.0558054	0.383909	-0.31908					-0.00607487	0.197372	0.0420799
10.3367	0.0757304	-0.293078	0.0457926	-0.00495052	0.0424366	0.119568	-0.0864204	-0.0597679	0.151797	0.119905	0.130786	0.0145002	-0.563647	-0.123391	0.0386476	0.0274092	0.0945463	-0.15057	0.212131	0.0565847	0.378026	-0.327311					-0.00460339	0.195422	0.0416641
10.435	0.0665822	-0.292263	0.0439072	-0.00273131	0.0427163	0.116667	-0.0661842	-0.0656337	0.164677	0.123842	0.144194	0.022272	-0.547379	-0.112358	0.033727	0.0314189	0.0909334	-0.156843	0.205387	0.0580262	0.37129	-0.336862					-0.00293703	0.193483	0.0412508
10.5333	0.0569712	-0.291176	0.0434976	-0.00312165	0.0431048	0.115721	-0.0448506	-0.071722	0.178917	0.127294	0.159002	0.0300109	-0.525521	-0.102217	0.0273118	0.0319056	0.0856048	-0.160957	0.197195	0.0590949	0.361552	-0.340115					-0.00102263	0.190347	0.0405822
10.6316	0.0469194	-0.288777	0.0420476	-0.00421265	0.0457611	0.114861	-0.0221852	-0.076685	0.189513	0.131308	0.170081	0.0399524	-0.503083	-0.0925188	0.0171718	0.0316813	0.0815393	-0.159615	0.183472	0.0640895	0.351541	-0.347719					0.000688234	0.187088	0.0398874
10.7299	0.0382655	-0.286397	0.0395099	-0.00371275	0.047935	0.113989	0.00159059	-0.0814657	0.198481	0.136732	0.178916	0.0472757	-0.481764	-0.0815143	0.00901416	0.0307417	0.0731793	-0.156068	0.166572	0.0701077	0.341721	-0.34937					0.00244268	0.183423	0.039106
10.8282	0.0321012	-0.2862	0.0345207	-0.00350922	0.0486003	0.116499	0.0228182	-0.0846585	0.204965	0.140839	0.187	0.0525458	-0.458225	-0.0713099	-0.00165356	0.0284893	0.0685846	-0.148935	0.150321	0.0743891	0.326315	-0.351147					0.00374316	0.179356	0.0382388
10.9265	0.0246694	-0.283638	0.0318134	-0.00191082	0.04623	0.118764	0.042839	-0.0881019	0.208182	0.142616	0.196098	0.0561252	-0.433905	-0.060095	-0.0135571	0.027879	0.0633284	-0.141324	0.135154	0.0819593	0.305723	-0.353808					0.00477463	0.174923	0.0372937
11.0248	0.014546	-0.279386	0.0272187	-0.000812272	0.0445298	0.121427	0.0613873	-0.0916746	0.208121	0.144358	0.204224	0.0599685	-0.40737	-0.0487288	-0.027074	0.0285708	0.0620775	-0.131777	0.122385	0.0866779	0.285543	-0.352343					0.00599407	0.170005	0.0362453
11.1231	0.0057081	-0.276305	0.0206208	0.00107774	0.0446932	0.123441	0.079678	-0.0930395	0.204515	0.14714	0.214673	0.0621514	-0.380883	-0.0330892	-0.0393429	0.0329868	0.0646719	-0.12156	0.113172	0.0920212	0.26671	-0.351848					0.00805425	0.165833	0.0353556
11.2214	-0.0014904	-0.270593	0.0134315	0.00442797	0.0471208	0.123448	0.0995992	-0.0939815	0.200357	0.149763	0.224225	0.0623928	-0.354251	-0.0172224	-0.0500614	0.0351833	0.0700889	-0.111262	0.104094	0.0949124	0.24856	-0.354306					0.0102016	0.162099	0.0345596
11.3197	-0.00861942	-0.269314	0.00442646	0.00929514	0.0470632	0.123791	0.119113	-0.0957901	0.196964	0.153168	0.229971	0.0611572	-0.327146	-0.00442681	-0.0605041	0.0375551	0.0777015	-0.101463	0.0945328	0.0951522	0.234129	-0.360156					0.0116636	0.159612	0.0340293
11.418	-0.0196728	-0.268721	-0.00420377	0.0130868	0.0476655	0.124436	0.135757	-0.093747	0.194405	0.154983	0.240008	0.0579363	-0.301861	0.00760749	-0.0729071	0.0387896	0.0850599	-0.0931239	0.0843686	0.0960739	0.220356	-0.36409					0.0128275	0.157867	0.0336575
11.5163	-0.0290353	-0.268542	-0.0125291	0.0207834	0.0491621	0.124192	0.149757	-0.0906647	0.189971	0.153703	0.250917	0.0524544	-0.277696	0.0220576	-0.0834458	0.0377896	0.0934697	-0.0891844	0.0730429	0.0991213	0.206277	-0.367394					0.0138276	0.15647	0.0333596
11.6146	-0.0390253	-0.265288	-0.0209824	0.0282891	0.0521306	0.123252	0.1612	-0.0868301	0.184776	0.152217	0.257843	0.0436787	-0.254708	0.0310156	-0.0907512	0.0354073	0.10204	-0.0866721	0.0663164	0.102554	0.194718	-0.369034					0.0146431	0.154894	0.0330235
11.7129	-0.04859	-0.259173	-0.0268766	0.0333122	0.0538292	0.122014	0.169753	-0.0847305	0.178508	0.150629	0.262115	0.0342876	-0.236048	0.0432861	-0.0998333	0.0308953	0.109761	-0.0836906	0.0583559	0.103058	0.188805	-0.365443					0.015192	0.153043	0.0326289
11.8112	-0.0558016	-0.251809	-0.0342191	0.0365957	0.0581634	0.119784	0.177791	-0.0802755	0.170221	0.151221	0.262661	0.0244279	-0.217069	0.0552588	-0.106828	0.0258314	0.117505	-0.0789205	0.0506802	0.106094	0.181381	-0.360837					0.0159935	0.150731	0.0321359
11.9095	-0.0611964	-0.24336	-0.039822	0.0381891	0.0622835	0.115751	0.184237	-0.0783683	0.162374	0.154369	0.259493	0.0151836	-0.196158	0.0657919	-0.110045	0.0197645	0.124526	-0.072316	0.0413808	0.107423	0.173434	-0.353522					0.0167915	0.1476	0.0314685
12.0078	-0.0683169	-0.235142	-0.0439009	0.0422076	0.0646003	0.111075	0.186469	-0.0738226	0.152573	0.15656	0.251749	0.00744155	-0.179351	0.0770653	-0.112594	0.0103851	0.132709	-0.0650116	0.0336144	0.104383	0.166214	-0.341212					0.017168	0.143645	0.0306252
12.1061	-0.0752812	-0.227293	-0.0502738	0.0496416	0.0653148	0.104909	0.18815	-0.0718364	0.139888	0.155451	0.244766	-0.000537746	-0.164109	0.0861094	-0.116692	-0.00305734	0.140626	-0.0556088	0.0266707	0.101736	0.156467	-0.336752					0.0162858	0.140737	0.0300051
12.2044	-0.0824184	-0.219016	-0.0559548	0.0583969	0.0661532	0.0977741	0.188643	-0.0734812	0.122657	0.152914	0.234576	-0.00930306	-0.147166	0.0926235	-0.12001	-0.0161795	0.145657	-0.0475475	0.0153516	0.0955528	0.143941	-0.338333					0.0138559	0.137918	0.0294043
12.3027	-0.087031	-0.210933	-0.0625925	0.0645923	0.0685949	0.091307	0.189632	-0.0735996	0.104485	0.153121	0.225339	-0.0171607	-0.126585	0.0986788	-0.120526	-0.0270148	0.149208	-0.0403947	0.00945099	0.0864424	0.130591	-0.338458					0.0121431	0.134983	0.0287785
12.401	-0.0930613	-0.198549	-0.067122	0.0734311	0.0724312	0.0828846	0.187871	-0.0716419	0.086113	0.152467	0.217129	-0.0287639	-0.107166	0.100083	-0.11979	-0.0359022	0.151392	-0.0310032	0.00701883	0.0769449	0.115982	-0.328789					0.0109982	0.130565	0.0278366
12.4994	-0.0991465	-0.183218	-0.0696795	0.0818173	0.0771725	0.0774649	0.184435	-0.0692313	0.0674425	0.153974	0.209681	-0.0458038	-0.0903689	0.10052	-0.121196	-0.0479338	0.152973	-0.0212271	0.00532323	0.0642456	0.103817	-0.316146					0.00976891	0.126478	0.0269651
12.5977	-0.105118	-0.167859	-0.0738127	0.091647	0.0815012	0.0732602	0.179702	-0.0656487	0.0487682	0.154271	0.20609	-0.0643748	-0.0795367	0.100131	-0.122143	-0.0573613	0.154111	-0.0138656	0.0023408	0.0504029	0.0956631	-0.305537					0.00830143	0.123678	0.0263683
12.696	-0.112101	-0.153354	-0.0758943	0.10498	0.0821663	0.0705942	0.17408	-0.0618484	0.0325858	0.15473	0.205598	-0.0861875	-0.0698387	0.100459	-0.121569	-0.0668947	0.156055	-0.0102951	0.00510034	0.0317829	0.0934282	-0.288655					0.00749648	0.121349	0.0258717
12.7943	-0.122375	-0.139722	-0.0773186	0.120559	0.0823818	0.0701239	0.168903	-0.0580914	0.0189017	0.153879	0.206133	-0.104643	-0.0584581	0.0990151	-0.122157	-0.0771776	0.160099	-0.0074539	0.00920719	0.0105945	0.0897012	-0.274968					0.0066879	0.120368	0.0256626
12.8926	-0.134374	-0.125603	-0.0773249	0.135104	0.0835525	0.070716	0.16793	-0.0548591	0.00839813	0.151231	0.209959	-0.119526	-0.0500078	0.0974001	-0.119793	-0.085529	0.160515	-0.00691444	0.011813	-0.0103534	0.0926358	-0.260882					0.00654946	0.120223	0.0256316
12.9909	-0.142787	-0.111114	-0.0799675	0.144636	0.0872441	0.0728486	0.169816	-0.0500837	0.00173011	0.153115	0.21186	-0.134577	-0.0412251	0.095448	-0.116743	-0.094231	0.160029	-0.00696775	0.0126949	-0.0354354	0.105478	-0.245206					0.00711652	0.120847	0.0257646
13.0892	-0.149188	-0.0959951	-0.0838474	0.156013	0.0887741	0.0751003	0.173586	-0.0452433	-0.00264038	0.154325	0.214391	-0.151251	-0.033744	0.0920665	-0.111766	-0.100927	0.155529	-0.00768083	0.0127812	-0.0579712	0.117242	-0.232901					0.00757506	0.122102	0.0260323
13.1875	-0.156946	-0.0792788	-0.0863501	0.168485	0.0904221	0.0786425	0.178252	-0.0401659	-0.0053876	0.154481	0.214965	-0.166294	-0.0267022	0.0839591	-0.10853	-0.109787	0.147547	-0.0101951	0.0103237	-0.0793949	0.127504	-0.219899					0.00752955	0.123493	0.0263287
13.2858	-0.165587	-0.0642961	-0.0856876	0.177485	0.0901973	0.0836727	0.182812	-0.0374857	-0.00744282	0.154878	0.214027	-0.177521	-0.0216292	0.0763871	-0.106419	-0.114968	0.137443	-0.0131743	0.00904929	-0.0999929	0.138547	-0.204998					0.00751347	0.124625	0.0265701
13.3841	-0.172982	-0.0481966	-0.0874057	0.183493	0.0900211	0.087872	0.188552	-0.0337295	-0.00705082	0.155327	0.213915	-0.188791	-0.0190091	0.0690544	-0.10253	-0.122201	0.12292	-0.0160765	0.00528773	-0.118806	0.145553	-0.189675					0.00707011	0.125734	0.0268065
13.4824	-0.180722	-0.0346393	-0.0902092	0.190182	0.0897685	0.0903977	0.195652	-0.0320277	-0.00635292	0.156505	0.209213	-0.197957	-0.0156056	0.0602214	-0.0943905	-0.129385	0.109061	-0.0155506	0.00190763	-0.139884	0.154704	-0.177088					0.00653639	0.127346	0.0271503
13.5807	-0.187399	-0.0204039	-0.0923635	0.193386	0.0891226	0.0957003	0.201109	-0.0327858	-0.00348789	0.157845	0.202947	-0.20593	-0.0121203	0.0489923	-0.0845862	-0.135297	0.0971915	-0.0142615	-0.00219913	-0.161075	0.163569	-0.165964					0.0059995	0.128933	0.0274886
13.679	-0.190999	-0.00812981	-0.0928355	0.198093	0.0878411	0.103919	0.207187	-0.0328917	0.000199484	0.158085	0.199208	-0.209159	-0.0114536	0.0406238	-0.0766963	-0.137669	0.0838642	-0.0139681	-0.0102307	-0.181212	0.171694	-0.154448					0.00595554	0.130505	0.0278237
13.7773	-0.192382	0.00191575	-0.0984247	0.2061	0.0866322	0.112454	0.216257	-0.030146	0.00623754	0.15607	0.196113	-0.209867	-0.00962155	0.0297366	-0.0689883	-0.135918	0.0721315	-0.0154713	-0.0172507	-0.198962	0.180626	-0.150664					0.00620807	0.132788	0.0283106
13.8756	-0.194007	0.0106023	-0.10522	0.215365	0.0830373	0.122819	0.227179	-0.0293394	0.0125643	0.154357	0.196499	-0.212404	-0.00851799	0.0187104	-0.0623505	-0.133328	0.0605583	-0.0183722	-0.0256432	-0.216041	0.18904	-0.149558					0.00617957	0.136191	0.0290359
13.9739	-0.195104	0.0171538	-0.112756	0.226807	0.0796298	0.133137	0.238966	-0.0280083	0.0208751	0.148636	0.201843	-0.214315	-0.0109531	0.00802823	-0.057391	-0.12842	0.0493421	-0.0238093	-0.0337486	-0.232209	0.196868	-0.150261					0.00610498	0.140165	0.0298833
14.0722	-0.193732	0.0233967	-0.122128	0.237545	0.0783141	0.144303	0.250975	-0.0280336	0.0293619	0.144554	0.209956	-0.216769	-0.0153104	-0.00505807	-0.054172	-0.122873	0.0366092	-0.0290086	-0.0428174	-0.244633	0.201681	-0.156071					0.00573135	0.144513	0.0308102
14.1705	-0.191712	0.0288314	-0.130358	0.247548	0.0788803	0.156807	0.260305	-0.0242393	0.0400785	0.137845	0.216774	-0.218921	-0.0207518	-0.0201718	-0.0513625	-0.113086	0.0228772	-0.033982	-0.0505703	-0.257739	0.205842	-0.156134					0.00576187	0.148245	0.031606
14.2688	-0.190765	0.0312644	-0.136645	0.254658	0.0794827	0.170323	0.268194	-0.0167646	0.057001	0.130686	0.229761	-0.220937	-0.0301034	-0.0319724	-0.0487092	-0.105036	0.0104971	-0.0371625	-0.0547468	-0.264472	0.210051	-0.150114					0.00702228	0.151612	0.0323238
14.3671	-0.191067	0.0337912	-0.142485	0.259737	0.0760381	0.183312	0.274093	-0.0104702	0.0751466	0.124298	0.24129	-0.22482	-0.045655	-0.0387478	-0.0451793	-0.0972758	-0.00258303	-0.0412965	-0.0616267	-0.266221	0.215648	-0.148045					0.00763106	0.154994	0.0330449
14.4654	-0.189794	0.0328424	-0.151404	0.263075	0.068578	0.197485	0.281048	-0.00732802	0.0932011	0.116329	0.250046	-0.223719	-0.0635432	-0.0445303	-0.041481	-0.0897702	-0.0153685	-0.0491099	-0.0693861	-0.266552	0.227461	-0.148295					0.00771749	0.158616	0.0338171
14.5637	-0.188728	0.029638	-0.159878	0.267864	0.0584191	0.210456	0.289268	-0.00627712	0.11152	0.107487	0.260647	-0.221047	-0.0825805	-0.0489392	-0.0370258	-0.0782415	-0.0262025	-0.0580467	-0.0788226	-0.262369	0.239622	-0.151497					0.00796671	0.162481	0.0346412
14.662	-0.187293	0.0257855	-0.16547	0.271797	0.0483138	0.221014	0.298949	-0.00606336	0.12591	0.100974	0.264591	-0.215227	-0.101542	-0.0524434	-0.0323341	-0.0673534	-0.0345104	-0.0658207	-0.0876705	-0.258032	0.246691	-0.1584					0.0078121	0.165557	0.035297
14.7603	-0.185646	0.0220901	-0.171747	0.271233	0.0411951	0.22768	0.306141	-0.00627415	0.138112	0.0942496	0.265079	-0.205836	-0.121374	-0.0558554	-0.0266573	-0.05816	-0.0455137	-0.0737724	-0.0971293	-0.25254	0.242981	-0.161865					0.00665413	0.166902	0.0355837
14.8586	-0.183154	0.019164	-0.175997	0.268376	0.0347444	0.230743	0.310842	-0.00712455	0.143854	0.0885513	0.265673	-0.197516	-0.143252	-0.057737	-0.0209002	-0.0498423	-0.0574146	-0.0846775	-0.10532	-0.24515	0.243066	-0.158525					0.00538194	0.167627	0.0357382
14.957	-0.17886	0.0164683	-0.177789	0.265465	0.028694	0.229487	0.311052	-0.00748349	0.146175	0.0851723	0.262116	-0.191182	-0.163971	-0.0600062	-0.013698	-0.0424704	-0.0668243	-0.0951069	-0.109321	-0.237447	0.24004	-0.151008					0.00406836	0.16691	0.0355853
15.0553	-0.175662	0.0105164	-0.177962	0.266257	0.0211896	0.22438	0.30915	-0.00852461	0.146865	0.0791449	0.261145	-0.184707	-0.184876	-0.0609793	-0.00577532	-0.0354912	-0.0720368	-0.10663	-0.112637	-0.225156	0.233591	-0.146791					0.00250051	0.165862	0.035362
15.1536	-0.173949	0.00100738	-0.17615	0.267647	0.0135441	0.217553	0.306317	-0.00911931	0.148275	0.075116	0.258504	-0.175815	-0.205792	-0.0612219	-0.00027575	-0.0312725	-0.0741965	-0.118185	-0.116132	-0.212364	0.230932	-0.140879					0.00107019	0.164869	0.0351501
15.2519	-0.171984	-0.0100186	-0.173176	0.267818	0.00434484	0.210047	0.302604	-0.0119223	0.149583	0.0723429	0.254144	-0.166086	-0.227143	-0.0594425	0.00453134	-0.0274598	-0.0756435	-0.127948	-0.118473	-0.201118	0.229927	-0.134007					-0.000412714	0.163808	0.034924
15.3502	-0.168103	-0.0212456	-0.173675	0.271898	-0.00405472	0.202269	0.297687	-0.0131776	0.149926	0.0707531	0.248568	-0.158732	-0.247305	-0.0586162	0.0132769	-0.0248561	-0.0749685	-0.137579	-0.12087	-0.189023	0.229562	-0.127456					-0.00162369	0.163227	0.0348002
15.4485	-0.163533	-0.0322063	-0.173264	0.27595	-0.0112556	0.194038	0.289927	-0.0148332	0.145948	0.0670254	0.243143	-0.149638	-0.266871	-0.0576645	0.0215093	-0.0185103	-0.0729054	-0.144578	-0.12034	-0.17641	0.230547	-0.120259					-0.00246277	0.162083	0.0345562
15.5468	-0.156297	-0.0405115	-0.172075	0.277763	-0.0186515	0.187874	0.278766	-0.0150486	0.142097	0.0645639	0.241069	-0.142129	-0.286101	-0.0557144	0.0277435	-0.00863423	-0.0719447	-0.154327	-0.117418	-0.158536	0.233871	-0.111158					-0.00249085	0.160923	0.034309
15.6451	-0.152591	-0.0497752	-0.172911	0.279338	-0.0279526	0.178224	0.270021	-0.00942171	0.135511	0.063693	0.23604	-0.134212	-0.305825	-0.0533814	0.0312791	-0.00204492	-0.0720576	-0.159663	-0.113857	-0.142631	0.239617	-0.102686					-0.00296761	0.160185	0.0341515
15.7434	-0.152135	-0.0599763	-0.176272	0.275868	-0.0362044	0.164374	0.261919	-0.00154361	0.128824	0.0601228	0.22985	-0.131032	-0.325019	-0.0493786	0.0350191	-0.000372723	-0.0725555	-0.164577	-0.108246	-0.126385	0.238638	-0.0958685					-0.0047705	0.15898	0.0338947
15.8417	-0.154353	-0.0694752	-0.176913	0.268671	-0.0450352	0.148665	0.250548	0.00484084	0.120985	0.0577525	0.222873	-0.130051	-0.345412	-0.0436989	0.040401	-0.00162643	-0.0731943	-0.167546	-0.1014	-0.110756	0.232484	-0.0843303					-0.00711684	0.157032	0.0334793
15.94	-0.156382	-0.0786352	-0.176225	0.258881	-0.0536539	0.130107	0.235713	0.0121654	0.113687	0.0528995	0.210509	-0.129254	-0.365838	-0.0375202	0.0465868	-0.0039148	-0.0755668	-0.170442	-0.0952078	-0.0962427	0.230941	-0.0690404					-0.00983788	0.15484	0.0330121
16.0383	-0.159146	-0.0864659	-0.178418	0.247096	-0.0625908	0.111913	0.218807	0.0235679	0.104489	0.0525091	0.192916	-0.129657	-0.384928	-0.0283667	0.0531266	-0.00881791	-0.077993	-0.173806	-0.0862319	-0.0840065	0.230716	-0.0510741					-0.0125619	0.152747	0.0325658
16.1366	-0.164556	-0.095487	-0.180508	0.23358	-0.0712906	0.0925374	0.202697	0.035326	0.0939514	0.0518028	0.173631	-0.132665	-0.401373	-0.0180037	0.0612584	-0.0137326	-0.0782524	-0.175614	-0.0780595	-0.0735188	0.233341	-0.0285614					-0.015159	0.151149	0.0322251
16.2349	-0.17393	-0.105458	-0.182845	0.217567	-0.0827069	0.0745013	0.186781	0.0451455	0.0829	0.0540907	0.151431	-0.136878	-0.418536	-0.00717946	0.0699654	-0.0196864	-0.077822	-0.178581	-0.0711106	-0.0623788	0.235401	-0.00628336					-0.018437	0.150499	0.0320865
16.3332	-0.182513	-0.112726	-0.186657	0.203263	-0.0932503	0.0559114	0.171355	0.0509202	0.0675707	0.0582276	0.123983	-0.14051	-0.434583	0.00298954	0.0789128	-0.0205309	-0.0773326	-0.182295	-0.0652543	-0.0560956	0.237204	0.0127029					-0.0222139	0.150262	0.032036
16.4315	-0.190483	-0.119036	-0.188802	0.19252	-0.103014	0.038385	0.158339	0.0568001	0.0521542	0.0629353	0.0975718	-0.143489	-0.449449	0.00840421	0.0858994	-0.0211631	-0.0714139	-0.182675	-0.0582528	-0.0557384	0.237396	0.0323901					-0.0254873	0.150502	0.0320872
16.5298	-0.1975	-0.121299	-0.187497	0.181981	-0.109895	0.0205026	0.145482	0.0645334	0.0354922	0.0706288	0.0720692	-0.150752	-0.458837	0.0149217	0.0920107	-0.0225553	-0.0635194	-0.181481	-0.0519405	-0.0566972	0.234559	0.051913					-0.0280854	0.150296	0.0320433
16.6281	-0.20458	-0.122849	-0.1887	0.170015	-0.115541	0.00179411	0.130471	0.0726501	0.0177636	0.0774116	0.0448363	-0.156708	-0.464807	0.0197214	0.0991892	-0.0272333	-0.0559826	-0.179345	-0.0432623	-0.0617364	0.233756	0.0758017					-0.030788	0.150381	0.0320613
16.7264	-0.211893	-0.123938	-0.191816	0.159851	-0.123436	-0.0152872	0.114707	0.0802046	0.00507631	0.0823861	0.0224221	-0.162655	-0.468467	0.0247027	0.107687	-0.0304746	-0.0519378	-0.177243	-0.0347823	-0.0665446	0.239249	0.105327					-0.0325847	0.152071	0.0324216
16.8247	-0.219203	-0.125456	-0.193997	0.153138	-0.132835	-0.0280753	0.101755	0.0869156	-0.00634938	0.0866237	0.000815184	-0.17041	-0.470393	0.0283758	0.113754	-0.0292267	-0.0458164	-0.175757	-0.0280269	-0.0697838	0.24738	0.124885					-0.0341675	0.154247	0.0328855
16.923	-0.226617	-0.126691	-0.197728	0.146643	-0.141892	-0.0385643	0.0907812	0.0939036	-0.0130536	0.0878629	-0.0200289	-0.177709	-0.469712	0.0297652	0.116843	-0.0240904	-0.0392668	-0.170741	-0.0239856	-0.0740305	0.256353	0.13548					-0.035749	0.155945	0.0332475
17.0213	-0.234032	-0.12689	-0.20528	0.141357	-0.153842	-0.0460732	0.08119	0.102278	-0.0182068	0.0887295	-0.0372344	-0.185238	-0.470163	0.0336445	0.117221	-0.0181597	-0.0335133	-0.165149	-0.0227075	-0.0746211	0.268607	0.140308					-0.0371716	0.158389	0.0337687
17.1196	-0.244803	-0.125708	-0.212199	0.135836	-0.164163	-0.0482347	0.0692808	0.110655	-0.0236645	0.090036	-0.0558221	-0.192354	-0.47272	0.033641	0.116747	-0.0132553	-0.0308699	-0.157153	-0.0200469	-0.0774332	0.280022	0.150215					-0.038727	0.16135	0.0344
17.2179	-0.253917	-0.121499	-0.217031	0.129823	-0.172437	-0.0492913	0.0548453	0.117313	-0.0297568	0.0889224	-0.0738492	-0.20201	-0.473741	0.0327416	0.116038	-0.00926379	-0.0284836	-0.148649	-0.0187412	-0.0825192	0.291699	0.159615					-0.0404633	0.16388	0.0349394
17.3162	-0.261211	-0.115967	-0.224419	0.124893	-0.180148	-0.0502779	0.0413442	0.125585	-0.0354367	0.0871861	-0.0867238	-0.212441	-0.471916	0.0317842	0.115642	-0.00503458	-0.0251783	-0.140652	-0.0171258	-0.085233	0.301588	0.164554					-0.0417813	0.166013	0.0353941
17.4146	-0.269987	-0.109749	-0.229553	0.116917	-0.187491	-0.0506315	0.0283121	0.133868	-0.0383915	0.0851187	-0.095498	-0.221873	-0.469057	0.0304335	0.110108	-0.000137405	-0.0212076	-0.134834	-0.0175654	-0.08738	0.310641	0.164831					-0.0433239	0.167443	0.035699
17.5129	-0.278381	-0.101606	-0.231422	0.10895	-0.194797	-0.0474615	0.0157869	0.142709	-0.0369565	0.0850666	-0.104295	-0.232994	-0.464387	0.0300842	0.103912	0.00189041	-0.0168701	-0.133129	-0.0175741	-0.0896772	0.322359	0.166535					-0.0441934	0.169253	0.0360849
17.6112	-0.288067	-0.0955139	-0.2345	0.106176	-0.200406	-0.0458954	0.00736108	0.148867	-0.0342414	0.0831093	-0.116973	-0.243741	-0.459338	0.0288016	0.0970438	0.000116414	-0.011047	-0.129373	-0.0193477	-0.0976557	0.327008	0.1686					-0.0458644	0.170709	0.0363954
17.7095	-0.293315	-0.0892681	-0.234032	0.107532	-0.204395	-0.0410042	0.00114834	0.149656	-0.0313493	0.0793834	-0.125547	-0.25644	-0.453037	0.028385	0.091544	0.00155357	-0.00579113	-0.127573	-0.0220818	-0.10397	0.328232	0.174341					-0.0466376	0.171533	0.0365709
17.8078	-0.29626	-0.07997	-0.229998	0.114053	-0.209587	-0.0342043	-0.0036015	0.148626	-0.0289812	0.0798109	-0.132597	-0.2669	-0.444485	0.0259396	0.0870627	0.00578681	0.000109878	-0.124779	-0.0238931	-0.110478	0.335728	0.180249					-0.045835	0.172743	0.0368289
17.9061	-0.297649	-0.0696083	-0.22577	0.124364	-0.212562	-0.0258163	-0.00682156	0.144008	-0.0271527	0.0808057	-0.139624	-0.277448	-0.435649	0.0215613	0.0805745	0.00986701	0.00708145	-0.120871	-0.0251372	-0.117317	0.344276	0.186302					-0.044663	0.173925	0.037081
18.0044	-0.298118	-0.0589336	-0.220332	0.13617	-0.215679	-0.014667	-0.00904677	0.138769	-0.0245391	0.0857209	-0.141458	-0.286431	-0.427376	0.0158938	0.0735099	0.0160794	0.0175673	-0.115228	-0.0250887	-0.125269	0.345021	0.186328					-0.0430503	0.174117	0.0371219
18.1027	-0.299262	-0.0476525	-0.210825	0.148382	-0.21781	-0.00322418	-0.0102967	0.128874	-0.021227	0.0878528	-0.140294	-0.294287	-0.419548	0.0069231	0.0650647	0.0257629	0.028145	-0.106529	-0.0270176	-0.130694	0.345142	0.184314					-0.0412821	0.173655	0.0370234
18.201	-0.299839	-0.0330172	-0.199317	0.162618	-0.220611	0.00788646	-0.0110201	0.118798	-0.0172425	0.0879438	-0.138515	-0.297311	-0.413255	-0.00152511	0.0547935	0.0363942	0.0380285	-0.0995921	-0.0277741	-0.134789	0.348758	0.176809					-0.0391718	0.173243	0.0369356
18.2993	-0.29743	-0.0177515	-0.188223	0.179597	-0.220573	0.0171454	-0.00966817	0.110454	-0.0143981	0.0883813	-0.134447	-0.297508	-0.406327	-0.00907064	0.0447366	0.0457447	0.0484371	-0.0916022	-0.0290419	-0.137877	0.351918	0.167965					-0.0363427	0.172571	0.0367923
18.3976	-0.294055	-0.00560471	-0.17725	0.19639	-0.22168	0.0283993	-0.00667778	0.105138	-0.0093617	0.0868198	-0.130125	-0.296027	-0.399076	-0.0173855	0.0337444	0.0482279	0.0615802	-0.0814419	-0.0309232	-0.138112	0.3575	0.160545					-0.0331535	0.172232	0.03672
18.4959	-0.289473	0.0042679	-0.165591	0.211075	-0.221169	0.0377733	-0.00383509	0.100538	-0.00669405	0.0811533	-0.128208	-0.294651	-0.389738	-0.0259906	0.0225365	0.0488847	0.06826	-0.072259	-0.0313165	-0.133337	0.36513	0.155259					-0.0303357	0.171547	0.036574
18.5942	-0.28358	0.00925592	-0.155053	0.22444	-0.220231	0.0476142	-0.000906821	0.0983878	-0.00382443	0.0737656	-0.123523	-0.292878	-0.385029	-0.0327452	0.0125649	0.0493129	0.0724965	-0.0624932	-0.0306512	-0.129782	0.37117	0.146404					-0.0279675	0.170921	0.0364404
18.6925	-0.275965	0.0134376	-0.140396	0.236495	-0.218442	0.057054	0.00387091	0.0979241	0.000457216	0.0658215	-0.120061	-0.291707	-0.382951	-0.0369271	0.00243755	0.0511549	0.0772065	-0.0528453	-0.0303457	-0.120417	0.377629	0.131077					-0.0252497	0.170156	0.0362773
18.7908	-0.268422	0.0191656	-0.126209	0.24601	-0.212702	0.0642911	0.00936902	0.0994242	0.00298784	0.0571871	-0.117407	-0.29114	-0.381508	-0.0425266	-0.00793867	0.050801	0.0860138	-0.0440189	-0.0306674	-0.110108	0.381419	0.112977					-0.0228637	0.169113	0.0360551
18.8891	-0.258932	0.0262045	-0.114137	0.25272	-0.205928	0.0698982	0.0122609	0.102642	0.00566836	0.0512064	-0.112442	-0.289121	-0.381328	-0.0475011	-0.0169741	0.0485513	0.0931864	-0.028942	-0.0287911	-0.101481	0.389995	0.100732					-0.0196596	0.168711	0.0359693
18.9874	-0.24748	0.03046	-0.103831	0.258153	-0.199171	0.0738933	0.0145119	0.1075	0.00985167	0.0499193	-0.106687	-0.287589	-0.382968	-0.0512444	-0.0203105	0.0423539	0.0992682	-0.0137862	-0.0247203	-0.0904692	0.393022	0.0909966					-0.0162876	0.167931	0.0358031
19.0857	-0.237089	0.0330084	-0.0903159	0.26328	-0.187737	0.078177	0.0178825	0.112348	0.0132153	0.049101	-0.102499	-0.285597	-0.382467	-0.0564535	-0.0236899	0.0351733	0.104637	0.00312665	-0.0214185	-0.0813072	0.388911	0.0846648					-0.0129568	0.166208	0.0354356
19.184	-0.220692	0.0354765	-0.0771875	0.267529	-0.177242	0.0774238	0.022042	0.117792	0.0160606	0.0468666	-0.0964635	-0.283935	-0.379248	-0.0585193	-0.0264807	0.0308586	0.110319	0.0182481	-0.0182407	-0.0747423	0.383713	0.0752139					-0.00960038	0.16374	0.0349095
19.2823	-0.203567	0.0369143	-0.0685887	0.26996	-0.167563	0.0754125	0.0312188	0.123953	0.0158581	0.046453	-0.0869658	-0.281676	-0.377942	-0.0604199	-0.0275321	0.0278115	0.114781	0.0323327	-0.0120642	-0.0691211	0.372524	0.0711498					-0.00623053	0.160956	0.0343159
19.3806	-0.187904	0.0377803	-0.0565111	0.271828	-0.157048	0.0743787	0.0389666	0.130057	0.0138655	0.0470391	-0.0799583	-0.279278	-0.380199	-0.0630188	-0.0282866	0.0260076	0.119202	0.0457502	-0.00695897	-0.0654662	0.360243	0.0677793					-0.00326055	0.15869	0.0338328
19.4789	-0.172312	0.039661	-0.044544	0.273128	-0.147833	0.0730702	0.0457165	0.136435	0.0081994	0.0436736	-0.0758562	-0.276385	-0.383712	-0.0650304	-0.027481	0.0211986	0.122176	0.0627567	0.000623709	-0.0603074	0.349454	0.0704691					-0.000313573	0.156976	0.0334675
19.5772	-0.159242	0.0406961	-0.0360826	0.272977	-0.138261	0.0671191	0.053933	0.141714	0.00254299	0.0385267	-0.0706941	-0.27222	-0.387193	-0.0671104	-0.0258889	0.0172955	0.124713	0.084015	0.00815509	-0.0564648	0.332676	0.0700515					0.00187538	0.154743	0.0329913
19.6755	-0.145001	0.0438804	-0.0261081	0.264976	-0.127357	0.0620088	0.0618788	0.147767	-0.0041384	0.0362748	-0.0592923	-0.269478	-0.391108	-0.0681958	-0.0231334	0.0145777	0.123863	0.103636	0.0163742	-0.0478649	0.321746	0.06713					0.00465616	0.152494	0.0325118
19.7738	-0.133273	0.0455475	-0.0187521	0.25016	-0.114104	0.0553269	0.0668521	0.155296	-0.00919109	0.0331026	-0.0453861	-0.264127	-0.395356	-0.0701854	-0.0209064	0.01101	0.121379	0.12358	0.0270643	-0.0418465	0.31263	0.0638338					0.00693882	0.150071	0.0319953
19.8722	-0.12326	0.040875	-0.0156178	0.234535	-0.100644	0.0461894	0.070538	0.159887	-0.0139018	0.0271385	-0.0348417	-0.260517	-0.400583	-0.0720713	-0.020629	0.00800492	0.119471	0.142786	0.0366344	-0.038228	0.30294	0.0598167					0.00766008	0.14811	0.0315771
19.9705	-0.113364	0.0339318	-0.0131448	0.216677	-0.0874588	0.0368311	0.0745893	0.168573	-0.020372	0.0220205	-0.0198312	-0.255721	-0.405254	-0.0732417	-0.0189151	0.00633961	0.116475	0.159493	0.0449931	-0.0346182	0.296904	0.0602213					0.00886934	0.146639	0.0312635
20.0688	-0.104487	0.0269284	-0.0118473	0.198128	-0.0726408	0.0272479	0.0810905	0.178168	-0.0288334	0.0136681	-0.00713453	-0.251041	-0.407786	-0.0738144	-0.0159254	0.00198744	0.111169	0.174235	0.0533335	-0.0291726	0.297273	0.0646915					0.0102381	0.145871	0.0310998
20.1671	-0.0935995	0.0168692	-0.012499	0.179334	-0.0582538	0.0165877	0.0878287	0.18975	-0.0373901	0.00460751	0.00586949	-0.248305	-0.409202	-0.0745049	-0.012604	-0.00710645	0.106509	0.185528	0.0626195	-0.0253321	0.29468	0.0704277					0.0109916	0.14531	0.0309803
20.2654	-0.0818583	0.00167066	-0.0144832	0.158938	-0.0431997	0.00652023	0.0939336	0.199053	-0.0432279	-0.00362583	0.019148	-0.247201	-0.408975	-0.0772763	-0.00806086	-0.0175242	0.0988788	0.196563	0.0721104	-0.0238825	0.284865	0.0781365					0.0109319	0.144332	0.0307717
20.3637	-0.0680137	-0.013362	-0.0150919	0.134933	-0.0287153	-0.0020133	0.0994932	0.205538	-0.0468318	-0.010129	0.0331883	-0.248726	-0.405983	-0.0814389	-0.00260421	-0.0269059	0.0916073	0.205158	0.0819677	-0.0244964	0.279815	0.0843503					0.0109882	0.143688	0.0306343
20.462	-0.0534725	-0.0261719	-0.0143876	0.109886	-0.0116195	-0.0133665	0.103905	0.208982	-0.0515141	-0.013598	0.0500965	-0.250488	-0.401847	-0.0855656	0.00396151	-0.0320735	0.0830511	0.209595	0.0928358	-0.0291856	0.269484	0.092169					0.0109398	0.142595	0.0304013
20.5603	-0.0384334	-0.0397775	-0.0161198	0.0857574	0.00614146	-0.0242393	0.106985	0.210677	-0.0545819	-0.0150475	0.0715923	-0.249165	-0.398218	-0.0863713	0.0107445	-0.0356568	0.0790744	0.21329	0.101242	-0.0376948	0.260659	0.100428					0.0114221	0.14199	0.0302723
20.6586	-0.025518	-0.0511703	-0.018538	0.0645797	0.0216456	-0.0333044	0.110918	0.208231	-0.0580427	-0.016731	0.0902516	-0.242244	-0.391337	-0.0888554	0.0172511	-0.0377992	0.0765782	0.217094	0.108323	-0.0453831	0.253391	0.109379					0.0122145	0.14109	0.0300806
20.7569	-0.0143416	-0.0613338	-0.0240607	0.0430028	0.0368076	-0.0406482	0.116275	0.203596	-0.061898	-0.0156788	0.109238	-0.235682	-0.383285	-0.0928416	0.0222489	-0.0413799	0.0735099	0.222281	0.113252	-0.0566647	0.240578	0.122482					0.0125208	0.140445	0.0299429
20.8552	-0.00367908	-0.0733429	-0.02835	0.0225644	0.0491436	-0.0464347	0.120461	0.196081	-0.0649919	-0.0119641	0.127693	-0.231567	-0.376398	-0.0944376	0.0258713	-0.0443166	0.0674752	0.22922	0.119172	-0.068463	0.224767	0.135328					0.0124469	0.140319	0.0299162
20.9535	0.00484861	-0.0872976	-0.0310596	0.00354634	0.0616204	-0.0533092	0.127582	0.187693	-0.0681645	-0.0116816	0.143815	-0.229627	-0.369624	-0.0949619	0.0302044	-0.0489292	0.0623315	0.23049	0.120352	-0.0788337	0.204208	0.144524					0.0112603	0.140035	0.0298555
21.0518	0.0107572	-0.0977772	-0.0300059	-0.0136015	0.0741812	-0.0597224	0.133832	0.176597	-0.0738318	-0.0163161	0.158598	-0.227886	-0.363655	-0.0943905	0.030594	-0.0522251	0.0585127	0.229325	0.120657	-0.0918306	0.189215	0.152003					0.00968316	0.140194	0.0298896
21.1501	0.0166648	-0.107379	-0.0301715	-0.0310176	0.0845777	-0.0666702	0.138548	0.163214	-0.0783925	-0.0227943	0.1696	-0.22637	-0.359634	-0.0933947	0.0313668	-0.0541198	0.0537342	0.22674	0.12195	-0.108002	0.183432	0.155808					0.00762233	0.140977	0.0300563
21.2484	0.0170573	-0.114899	-0.0328393	-0.0467991	0.0968317	-0.0687347	0.145779	0.147254	-0.0811013	-0.0274308	0.177441	-0.226587	-0.355664	-0.0922125	0.0328881	-0.0589724	0.0481795	0.224617	0.122993	-0.119634	0.181683	0.159788					0.00589255	0.141983	0.030271
21.3467	0.0153355	-0.1214	-0.034566	-0.0597375	0.109024	-0.0672181	0.149817	0.130983	-0.0798034	-0.0329306	0.178776	-0.226832	-0.350541	-0.0901404	0.0339877	-0.0631795	0.0412942	0.222232	0.120996	-0.126233	0.188734	0.155655					0.00428419	0.142042	0.0302835
21.445	0.0129889	-0.128929	-0.038315	-0.0724913	0.121107	-0.0673184	0.155222	0.114291	-0.0758288	-0.0388686	0.178973	-0.229216	-0.344516	-0.0879509	0.0370654	-0.0693091	0.0334626	0.221585	0.11972	-0.131573	0.202892	0.156622					0.00316423	0.143281	0.0305475
21.5433	0.0102073	-0.137749	-0.0432934	-0.0833876	0.133792	-0.0684069	0.162617	0.0954872	-0.0699309	-0.0407147	0.17883	-0.233629	-0.339251	-0.085245	0.0406098	-0.0738668	0.0257838	0.219485	0.114753	-0.139209	0.215434	0.157202					0.00179619	0.144767	0.0308643
21.6416	0.0089728	-0.146632	-0.0451688	-0.0900971	0.143538	-0.0645846	0.168657	0.0782509	-0.0680882	-0.0423467	0.176171	-0.237361	-0.336111	-0.0837369	0.0438871	-0.0768737	0.0192072	0.215897	0.108529	-0.14544	0.229958	0.159197					0.00071936	0.146292	0.0311896
21.7399	0.00741073	-0.155462	-0.0477501	-0.0899615	0.149618	-0.0602242	0.17481	0.0616123	-0.0671796	-0.0466821	0.167982	-0.235681	-0.334504	-0.0801529	0.0469576	-0.0803489	0.0168652	0.213796	0.103055	-0.155263	0.242189	0.164644					-0.000194014	0.147537	0.0314551
21.8382	0.00447348	-0.161233	-0.0508549	-0.0835635	0.153708	-0.0551788	0.179928	0.0431599	-0.0661119	-0.0474724	0.155462	-0.234944	-0.335731	-0.0748474	0.0518874	-0.0830388	0.0195316	0.211412	0.0954781	-0.163322	0.255667	0.169532					-0.000729893	0.148531	0.0316669
21.9365	0.00305469	-0.161643	-0.0523275	-0.0779062	0.158197	-0.0461165	0.18204	0.0298832	-0.0647697	-0.0458562	0.145811	-0.230596	-0.336271	-0.0712602	0.0581053	-0.0881637	0.0235344	0.208817	0.0871063	-0.170267	0.27111	0.172097					-0.000246429	0.149244	0.0318189
22.0348	-0.000336455	-0.160963	-0.0550158	-0.0700962	0.160883	-0.0373707	0.184156	0.0153543	-0.060905	-0.0474555	0.130761	-0.227801	-0.336575	-0.0660538	0.063291	-0.0955443	0.0250496	0.205854	0.076069	-0.175572	0.282901	0.170094					-0.000876169	0.149176	0.0318044
22.1331	-0.00583975	-0.159931	-0.0570871	-0.0603091	0.160872	-0.0291982	0.185655	0.000683639	-0.0552313	-0.0491392	0.116849	-0.22518	-0.339313	-0.0616856	0.0658881	-0.103323	0.0254309	0.203853	0.0653665	-0.18144	0.294953	0.169389					-0.00176076	0.149622	0.0318995
22.2314	-0.0136961	-0.155974	-0.0585734	-0.0492773	0.161642	-0.019587	0.186873	-0.0133848	-0.0466561	-0.0489953	0.10023	-0.220514	-0.342069	-0.057937	0.0683327	-0.10738	0.0272155	0.203865	0.052216	-0.186238	0.314162	0.168883					-0.00167556	0.150556	0.0320986
22.3298	-0.0226486	-0.148383	-0.0589035	-0.0355323	0.161508	-0.0110224	0.187274	-0.0253024	-0.0399453	-0.0479344	0.0832432	-0.216967	-0.346216	-0.0502777	0.071221	-0.111232	0.0320577	0.203417	0.0395669	-0.189279	0.336228	0.172003					-0.000778421	0.152157	0.0324399
22.4281	-0.0346151	-0.139928	-0.0596125	-0.017189	0.160537	-0.00592074	0.185589	-0.0347652	-0.0358963	-0.0517267	0.0658417	-0.211418	-0.354268	-0.0409927	0.0719225	-0.116627	0.036075	0.203701	0.0280435	-0.192128	0.350614	0.173366					-0.000881716	0.153521	0.0327307
22.5264	-0.0483381	-0.131584	-0.0606826	0.00165628	0.155677	0.000417207	0.183976	-0.0392186	-0.0313898	-0.0597435	0.0467269	-0.207107	-0.362158	-0.0327116	0.0719769	-0.121155	0.0372939	0.206419	0.0160981	-0.191921	0.367756	0.172303					-0.00116853	0.155311	0.0331124
22.6247	-0.0643225	-0.120208	-0.0586211	0.0202607	0.148719	0.00554218	0.181746	-0.0408772	-0.0252624	-0.0672945	0.0258396	-0.205172	-0.370063	-0.0264075	0.0743416	-0.125387	0.0363825	0.208188	0.00596157	-0.189441	0.379221	0.167472					-0.00179008	0.15645	0.0333552
22.723	-0.0801143	-0.108761	-0.0574662	0.0362107	0.141293	0.0056998	0.175369	-0.0418465	-0.0182677	-0.0758168	0.00506422	-0.211706	-0.379385	-0.0211405	0.076882	-0.130546	0.0351413	0.209372	-0.00510238	-0.185692	0.387474	0.165181					-0.00355265	0.158164	0.0337206
22.8213	-0.0955889	-0.0998292	-0.0556276	0.0553421	0.132491	0.00463076	0.164766	-0.0400755	-0.0124345	-0.0862653	-0.0159039	-0.216941	-0.389754	-0.017305	0.0784523	-0.134309	0.0341055	0.206631	-0.0136908	-0.181793	0.396535	0.157822					-0.00585191	0.159743	0.0340573
22.9196	-0.111146	-0.0926998	-0.0550636	0.0735569	0.124232	0.00332717	0.154755	-0.0364733	-0.0083765	-0.0985098	-0.038238	-0.219158	-0.39933	-0.0152018	0.0784578	-0.139173	0.0355795	0.201888	-0.0222415	-0.179068	0.408402	0.151061					-0.00833727	0.161986	0.0345355
23.0179	-0.126626	-0.0837704	-0.0567426	0.0926151	0.11558	0.00336352	0.145203	-0.0349324	-0.00485585	-0.108437	-0.0602261	-0.220246	-0.409324	-0.0157074	0.0765846	-0.141334	0.0375328	0.196797	-0.0251877	-0.177513	0.423922	0.147675					-0.0102559	0.165084	0.035196
23.1162	-0.13968	-0.0759053	-0.0604429	0.110905	0.107475	0.00473022	0.137494	-0.0307175	-0.00192668	-0.116578	-0.0824196	-0.221787	-0.417977	-0.0170291	0.075643	-0.141911	0.0388941	0.192108	-0.0297	-0.176358	0.436584	0.147596					-0.0118638	0.16825	0.0358709
23.2145	-0.15113	-0.0689246	-0.0656982	0.130014	0.0982862	0.00607021	0.132025	-0.0250922	0.000972449	-0.123009	-0.0992543	-0.223104	-0.427172	-0.0201059	0.0758118	-0.143715	0.0415074	0.185856	-0.0326395	-0.173137	0.444291	0.151213					-0.0130424	0.17115	0.0364894
23.3128	-0.157999	-0.0654039	-0.0702749	0.149095	0.0870175	0.00456256	0.127138	-0.0192061	0.00419351	-0.130789	-0.116323	-0.221491	-0.437957	-0.0249505	0.0717036	-0.142329	0.0469426	0.177711	-0.0366404	-0.171904	0.448432	0.159547					-0.0144966	0.173818	0.037058
23.4111	-0.163337	-0.0622142	-0.0722427	0.165878	0.075796	-0.00115537	0.122728	-0.0113301	0.0059439	-0.138064	-0.130219	-0.217757	-0.447941	-0.0307815	0.068254	-0.143228	0.0546756	0.169943	-0.0411044	-0.175056	0.443314	0.170234					-0.0162574	0.175598	0.0374376
23.5094	-0.167222	-0.0558855	-0.0745633	0.184259	0.0637684	-0.00529179	0.117368	-0.00389104	0.00548932	-0.145584	-0.143475	-0.212495	-0.45715	-0.0355918	0.0625211	-0.141315	0.0635464	0.159784	-0.0470847	-0.181403	0.434912	0.175396					-0.0183594	0.176683	0.0376689
23.6077	-0.171092	-0.0494556	-0.077961	0.203621	0.0510958	-0.00860112	0.111311	0.00539914	0.00347845	-0.152396	-0.153261	-0.206979	-0.465454	-0.0406163	0.0570755	-0.13956	0.0722912	0.151907	-0.0489419	-0.187256	0.429963	0.179917					-0.0197961	0.178292	0.038012
23.706	-0.176097	-0.0441336	-0.0857106	0.217576	0.0422571	-0.0166561	0.105306	0.0128534	0.00266255	-0.157815	-0.161716	-0.20344	-0.474425	-0.0434789	0.0498587	-0.140066	0.0800999	0.143506	-0.0530642	-0.19247	0.425969	0.184972					-0.0220005	0.180199	0.0384185
23.8043	-0.18264	-0.0410447	-0.0924767	0.230106	0.0346029	-0.0254368	0.0971474	0.0210786	0.00157566	-0.162251	-0.169399	-0.206719	-0.481054	-0.0482122	0.0415322	-0.139081	0.085228	0.135774	-0.0577536	-0.196428	0.421267	0.187516					-0.0248486	0.181846	0.0387696
23.9026	-0.186097	-0.0385927	-0.0987912	0.240832	0.0261908	-0.0351742	0.0904772	0.0324046	0.00107721	-0.169299	-0.17705	-0.210829	-0.484163	-0.0555779	0.0298725	-0.139241	0.0872482	0.126887	-0.0628772	-0.201127	0.415573	0.184724					-0.0283424	0.182726	0.0389573
24.0009	-0.188255	-0.0370593	-0.103638	0.251494	0.0179348	-0.0456494	0.0875607	0.0399915	0.000763742	-0.177616	-0.186013	-0.217343	-0.488655	-0.059666	0.0191208	-0.137478	0.0881929	0.119035	-0.0665724	-0.205283	0.406109	0.186134					-0.0316769	0.183834	0.0391935
24.0992	-0.187618	-0.0347131	-0.105065	0.261215	0.0107238	-0.0549063	0.0844339	0.0481739	0.000991825	-0.184534	-0.190394	-0.223681	-0.495014	-0.0641207	0.00743306	-0.133009	0.0923347	0.114301	-0.0645525	-0.213293	0.398712	0.18664					-0.0339065	0.185283	0.0395025
24.1975	-0.183622	-0.0336857	-0.107926	0.272355	0.00605318	-0.0653606	0.0795981	0.0554761	0.00277301	-0.190739	-0.194999	-0.227336	-0.501629	-0.0665523	-0.00343272	-0.124964	0.0978304	0.109503	-0.0635539	-0.221954	0.387594	0.179807					-0.0361256	0.185973	0.0396497
24.2958	-0.179071	-0.0341078	-0.109277	0.282664	-0.000927318	-0.0778607	0.0776177	0.0634474	-0.000406898	-0.197034	-0.199159	-0.231654	-0.512109	-0.0657834	-0.0132028	-0.117923	0.099354	0.104472	-0.0624648	-0.230542	0.3703	0.16816					-0.0393412	0.186253	0.0397093
24.3941	-0.172886	-0.0357014	-0.110942	0.293489	-0.00851172	-0.0899056	0.0776596	0.0743404	-0.0026664	-0.201376	-0.202635	-0.234028	-0.521129	-0.0683491	-0.0237728	-0.108979	0.100474	0.101483	-0.0638514	-0.240364	0.35115	0.148299					-0.0426457	0.1861	0.0396767
24.4924	-0.164449	-0.0388529	-0.11288	0.301504	-0.0158699	-0.0982531	0.0808843	0.0868532	-0.00236858	-0.203401	-0.20464	-0.238729	-0.528327	-0.0716592	-0.0337299	-0.0973778	0.100162	0.100377	-0.0646241	-0.247988	0.338611	0.133303					-0.0446116	0.186566	0.0397759
24.5907	-0.155414	-0.0425413	-0.11654	0.309749	-0.021716	-0.107284	0.0854059	0.0946796	-0.00317781	-0.202927	-0.207737	-0.244281	-0.535984	-0.0716225	-0.0434658	-0.0879247	0.10172	0.0983617	-0.0652722	-0.255068	0.326253	0.11856					-0.0466466	0.187295	0.0399314
24.689	-0.145322	-0.0489775	-0.124017	0.316419	-0.026332	-0.1148	0.0910588	0.101999	-0.00750333	-0.202697	-0.211891	-0.249306	-0.542411	-0.0692727	-0.0551891	-0.0811342	0.10449	0.0972409	-0.0681432	-0.261995	0.319612	0.107196					-0.0486806	0.188726	0.0402364
24.7874	-0.134281	-0.0545926	-0.130359	0.325666	-0.0270677	-0.118607	0.100662	0.112231	-0.011706	-0.199125	-0.212798	-0.250507	-0.549335	-0.06697	-0.0679284	-0.073477	0.107486	0.0944551	-0.0691717	-0.269814	0.318212	0.0929971					-0.0492742	0.190721	0.0406618
24.8857	-0.122557	-0.056632	-0.138073	0.334788	-0.0277953	-0.120897	0.113865	0.119149	-0.0144769	-0.194244	-0.213044	-0.252112	-0.555388	-0.0634196	-0.078274	-0.0666526	0.109036	0.0955532	-0.0706657	-0.277659	0.323398	0.0844758					-0.0487102	0.193589	0.0412734
24.984	-0.109425	-0.0544677	-0.144324	0.347295	-0.027784	-0.124216	0.127387	0.126883	-0.0159395	-0.189787	-0.21067	-0.253649	-0.560767	-0.0600841	-0.0853607	-0.0580711	0.108646	0.0957042	-0.0727689	-0.281944	0.333091	0.0760207					-0.0470104	0.196849	0.0419684
25.0823	-0.0955028	-0.0503055	-0.146145	0.359248	-0.0279053	-0.129858	0.138419	0.137444	-0.0162672	-0.184735	-0.204993	-0.254859	-0.56347	-0.0541635	-0.0904826	-0.0524979	0.108942	0.0971008	-0.0769474	-0.287941	0.342592	0.0667957					-0.044797	0.199808	0.0425993
25.1806	-0.0825027	-0.0464017	-0.147721	0.371474	-0.0298432	-0.135513	0.147909	0.146494	-0.0146633	-0.177192	-0.20128	-0.253486	-0.56706	-0.0494473	-0.0981856	-0.0480247	0.109675	0.097933	-0.0775716	-0.290758	0.353549	0.0569135					-0.0425319	0.202744	0.0432251
25.2789	-0.069441	-0.0409889	-0.148723	0.38413	-0.0301964	-0.142484	0.154529	0.155733	-0.0127802	-0.170078	-0.202521	-0.252028	-0.568157	-0.0426792	-0.108207	-0.0439438	0.110171	0.101236	-0.0810444	-0.294186	0.367116	0.0454995					-0.0404111	0.206026	0.0439248
25.3772	-0.0586811	-0.033101	-0.148507	0.394544	-0.0308224	-0.148723	0.158698	0.166709	-0.0128062	-0.162162	-0.200879	-0.252075	-0.567301	-0.033841	-0.112243	-0.0426927	0.107706	0.106407	-0.0853738	-0.29651	0.381024	0.0251994					-0.0384287	0.208622	0.0444784
25.4755	-0.0502629	-0.0261082	-0.148635	0.4053	-0.0318812	-0.151668	0.163087	0.175659	-0.0134659	-0.154778	-0.196342	-0.25443	-0.56689	-0.023126	-0.118012	-0.0366007	0.106943	0.112696	-0.0858025	-0.29641	0.403037	0.00462766					-0.0355938	0.212086	0.045217
25.5738	-0.0419843	-0.0223728	-0.147507	0.413416	-0.031375	-0.154443	0.165424	0.184152	-0.0108898	-0.147298	-0.194057	-0.256522	-0.564401	-0.0113241	-0.123808	-0.0314406	0.10559	0.120542	-0.0826972	-0.292402	0.423092	-0.010524					-0.0323105	0.214845	0.0458052
25.6721	-0.0320162	-0.0174684	-0.144165	0.419538	-0.0298854	-0.15763	0.165338	0.190401	-0.00530538	-0.140696	-0.195622	-0.256712	-0.559446	0.00159263	-0.130608	-0.0239298	0.104975	0.12339	-0.0840722	-0.290495	0.437809	-0.025921					-0.0295876	0.216674	0.0461951
25.7704	-0.0221387	-0.0118902	-0.136825	0.430299	-0.0317288	-0.159112	0.166645	0.197824	0.00130114	-0.133253	-0.197663	-0.257085	-0.551091	0.0127025	-0.134996	-0.016485	0.104214	0.125385	-0.0808811	-0.287942	0.456071	-0.0414533					-0.025823	0.218892	0.0466679
25.8687	-0.0127494	-0.00482959	-0.128583	0.437548	-0.0328547	-0.162097	0.167634	0.204964	0.0104296	-0.124932	-0.197575	-0.254521	-0.543371	0.0239672	-0.139344	-0.0106925	0.105913	0.124819	-0.0805773	-0.284043	0.478821	-0.0581389					-0.0218279	0.221222	0.0471647
25.967	-0.00446557	0.00110554	-0.119897	0.442562	-0.0332019	-0.162748	0.166348	0.211521	0.0183718	-0.115432	-0.194272	-0.251587	-0.534596	0.0365507	-0.141364	-0.00385652	0.105423	0.124225	-0.0807426	-0.279546	0.497078	-0.0674668					-0.017545	0.222401	0.047416
26.0653	0.00248509	0.00728186	-0.111911	0.449215	-0.0360533	-0.163399	0.162614	0.219296	0.0258257	-0.104356	-0.191462	-0.249019	-0.524739	0.0489659	-0.145188	0.00501514	0.10202	0.121647	-0.0798894	-0.273915	0.514934	-0.0783753					-0.0135912	0.223591	0.0476697
26.1636	0.00871589	0.0134674	-0.106092	0.4531	-0.0407645	-0.163363	0.157513	0.226866	0.0324219	-0.0916818	-0.19403	-0.244205	-0.512743	0.0602515	-0.147855	0.014401	0.0990222	0.116245	-0.0849729	-0.264484	0.532062	-0.0886934					-0.0102191	0.224209	0.0478015
26.2619	0.0140959	0.0208917	-0.0981449	0.452759	-0.0451938	-0.159891	0.151181	0.235029	0.0337449	-0.0772076	-0.193884	-0.243651	-0.498031	0.0688515	-0.149404	0.0208519	0.0966511	0.109291	-0.091953	-0.251544	0.551827	-0.0915144					-0.00660203	0.224164	0.047792
26.3602	0.0228487	0.0299081	-0.0909897	0.45192	-0.0478461	-0.15343	0.141063	0.238059	0.0357895	-0.0639218	-0.192209	-0.242847	-0.47673	0.0763751	-0.15047	0.0267856	0.0981755	0.101663	-0.0944543	-0.239474	0.573387	-0.0910814					-0.00215814	0.223331	0.0476143
26.4585	0.0313817	0.0392328	-0.0844711	0.445812	-0.0484494	-0.144948	0.130504	0.234987	0.0352093	-0.0531673	-0.191376	-0.243214	-0.454814	0.0843427	-0.149923	0.0298094	0.0995773	0.0939037	-0.0923537	-0.225428	0.599193	-0.0855081					0.00228636	0.222128	0.047358
26.5568	0.0392173	0.0500225	-0.080118	0.439511	-0.0470558	-0.138012	0.114232	0.226396	0.0336973	-0.0407783	-0.191872	-0.242618	-0.43325	0.0936567	-0.149235	0.0314772	0.101267	0.0847616	-0.0927455	-0.212874	0.620317	-0.081241					0.0056707	0.22048	0.0470065
26.6551	0.0481925	0.0608323	-0.0721712	0.433688	-0.0428706	-0.130538	0.0941294	0.219699	0.0320165	-0.0288238	-0.191434	-0.239607	-0.412182	0.0996014	-0.149881	0.0339095	0.101397	0.0760175	-0.0948017	-0.199936	0.640808	-0.0770067					0.00913813	0.218924	0.0466749
26.7534	0.0574112	0.0725853	-0.0606461	0.431601	-0.0398371	-0.12064	0.0718499	0.210646	0.0346133	-0.0154791	-0.190282	-0.237582	-0.393498	0.102848	-0.151223	0.0394573	0.0986365	0.0664649	-0.0943925	-0.186262	0.65492	-0.0725545					0.0126653	0.217061	0.0462775
26.8517	0.0645282	0.083771	-0.0481059	0.42995	-0.0415309	-0.112206	0.0477757	0.197683	0.0383203	-0.00433581	-0.193316	-0.233202	-0.373144	0.108987	-0.153079	0.0441117	0.0960563	0.0587082	-0.0911571	-0.170975	0.663862	-0.0663123					0.015745	0.214649	0.0457634
26.95	0.0703215	0.0923256	-0.0325399	0.425058	-0.0397222	-0.105287	0.0216673	0.187359	0.0412629	0.00584075	-0.196776	-0.230649	-0.35238	0.116665	-0.156375	0.0497239	0.0958079	0.0491794	-0.0899576	-0.155808	0.666223	-0.0613659					0.0182079	0.211713	0.0451374
27.0483	0.0780365	0.0971158	-0.0195684	0.414199	-0.0372918	-0.0970495	-0.00603532	0.176693	0.044682	0.017422	-0.20239	-0.231289	-0.332501	0.125522	-0.160347	0.055587	0.0960704	0.0415306	-0.0881868	-0.14435	0.661219	-0.0576617					0.0196093	0.208135	0.0443746
27.1466	0.0873451	0.0985195	-0.01143	0.403622	-0.033175	-0.0850405	-0.0333011	0.165986	0.0471555	0.0265707	-0.211836	-0.230595	-0.313991	0.135257	-0.164692	0.0631476	0.0950771	0.0355487	-0.0879314	-0.129468	0.653561	-0.0550426					0.0206949	0.204705	0.0436432
27.245	0.0977626	0.0998896	-0.00365976	0.392736	-0.0289669	-0.0724324	-0.0596113	0.154238	0.0482104	0.0321539	-0.216263	-0.232167	-0.29346	0.145797	-0.165546	0.0698796	0.0954048	0.0322264	-0.0923404	-0.119271	0.641197	-0.0551347					0.021393	0.200897	0.0428314
27.3433	0.107907	0.0994785	0.00505219	0.380555	-0.0254782	-0.0573667	-0.0853086	0.141551	0.0485597	0.0375902	-0.213367	-0.233709	-0.276118	0.155264	-0.164091	0.0774198	0.0947729	0.0272063	-0.0960561	-0.108208	0.625613	-0.0558668					0.0220636	0.196479	0.0418894
27.4416	0.11805	0.0975787	0.0141235	0.369974	-0.0214036	-0.0418514	-0.111849	0.128697	0.048301	0.0435479	-0.213019	-0.235911	-0.261453	0.163441	-0.167854	0.0862018	0.0957067	0.023319	-0.0985166	-0.10023	0.609729	-0.0504669					0.0225507	0.193102	0.0411694
27.5399	0.13014	0.0960682	0.019918	0.359321	-0.0149709	-0.0290484	-0.139681	0.116287	0.0470937	0.0511096	-0.217134	-0.23681	-0.247919	0.168355	-0.170605	0.0895701	0.0948798	0.0184451	-0.101955	-0.0930388	0.585741	-0.0412074					0.0220255	0.18917	0.0403313
27.6382	0.141613	0.0950397	0.0252743	0.349525	-0.0108245	-0.0191962	-0.164962	0.105061	0.0444472	0.0593666	-0.214602	-0.237459	-0.239931	0.169873	-0.17185	0.0896664	0.0943116	0.0119301	-0.108414	-0.0880651	0.561433	-0.033623					0.0208461	0.185606	0.0395713
27.7365	0.151208	0.0923399	0.0311735	0.339429	-0.00624984	-0.00891746	-0.189332	0.0954282	0.040311	0.0670876	-0.209893	-0.238785	-0.235278	0.169429	-0.173912	0.0877793	0.0924602	0.00777141	-0.111662	-0.0799794	0.540282	-0.0253921					0.0197862	0.182566	0.0389232
27.8348	0.16164	0.089402	0.034725	0.327843	0.000296245	0.00180219	-0.215889	0.0850749	0.0362088	0.0710352	-0.203582	-0.237896	-0.23405	0.170653	-0.177949	0.0859117	0.0904142	0.00374642	-0.11738	-0.0760907	0.510288	-0.0185748					0.0176195	0.179097	0.0381837
27.9331	0.175993	0.0864604	0.0372139	0.320227	0.00560245	0.0141462	-0.240651	0.0730462	0.031187	0.0732468	-0.199187	-0.237105	-0.233728	0.173168	-0.180806	0.0850459	0.0869515	-2.81372e-05	-0.119538	-0.0748978	0.474537	-0.00843348					0.0155659	0.175812	0.0374832
28.0314	0.189464	0.0833493	0.0413794	0.315604	0.0119689	0.0233944	-0.260738	0.0570608	0.0254726	0.0731159	-0.19967	-0.234784	-0.237428	0.17611	-0.182965	0.0841307	0.0864774	-0.00286539	-0.119443	-0.0718696	0.446611	-2.26425e-05					0.0138342	0.174146	0.037128
28.1297	0.201021	0.0790274	0.0463112	0.308261	0.0216009	0.0321191	-0.278242	0.0401658	0.0191564	0.0704538	-0.199543	-0.233715	-0.241716	0.17722	-0.182485	0.0790616	0.0890854	-0.00263889	-0.124369	-0.0703092	0.419838	0.0141331					0.0120198	0.172567	0.0367915
28.228	0.211281	0.0734239	0.0510675	0.303227	0.0332516	0.0384918	-0.29299	0.0232411	0.0118416	0.0659019	-0.196442	-0.234269	-0.2451	0.178527	-0.180904	0.071592	0.0861903	-0.0019036	-0.125469	-0.0709224	0.392458	0.0278471					0.0100155	0.170841	0.0364234
28.3263	0.222334	0.0668493	0.0533336	0.298565	0.0439978	0.0414019	-0.305308	0.00556188	0.00730414	0.0608736	-0.197099	-0.233898	-0.249478	0.182879	-0.180395	0.0652898	0.0820951	0.000844574	-0.123038	-0.0770725	0.361094	0.0386669					0.00749099	0.169364	0.0361086
28.4246	0.228784	0.0590049	0.0539714	0.293085	0.0552633	0.0430448	-0.316198	-0.007094	0.00458951	0.0565623	-0.193849	-0.233705	-0.257427	0.185701	-0.180445	0.0603551	0.0750876	0.00415033	-0.12546	-0.0822475	0.332951	0.0540924					0.00500987	0.168326	0.0358871
28.5229	0.233473	0.0505835	0.0536036	0.290429	0.0644289	0.0431423	-0.330277	-0.0166044	0.00415727	0.0528154	-0.186581	-0.234585	-0.266175	0.190723	-0.183195	0.0574013	0.0674478	0.00537974	-0.133777	-0.0882584	0.304745	0.069819					0.00221345	0.168454	0.0359146
28.6212	0.237681	0.0408388	0.0550882	0.29167	0.0689622	0.0439151	-0.338653	-0.0226779	0.00391974	0.047969	-0.183225	-0.235313	-0.273549	0.193669	-0.184568	0.0544461	0.0610834	0.00655411	-0.140263	-0.0944544	0.281302	0.0828112					-0.000126983	0.168838	0.0359963
28.7195	0.240957	0.0317385	0.0521197	0.293358	0.0685331	0.0446587	-0.342207	-0.0281472	0.00719999	0.0432001	-0.179793	-0.237808	-0.279852	0.199324	-0.182013	0.0517865	0.0558919	0.0096196	-0.142857	-0.103062	0.257489	0.102593					-0.00169405	0.168967	0.0360238
28.8178	0.244721	0.0232638	0.0468113	0.290868	0.0722089	0.0424597	-0.34117	-0.0337603	0.00827438	0.0351605	-0.174888	-0.238742	-0.284193	0.206993	-0.177934	0.0476551	0.0529524	0.0137274	-0.146879	-0.113813	0.232465	0.118644					-0.00341701	0.168359	0.0358944
28.9161	0.248822	0.0128889	0.0391486	0.285792	0.0795438	0.0417232	-0.338966	-0.0360583	0.00810283	0.0261643	-0.167849	-0.243392	-0.28826	0.212395	-0.172009	0.041263	0.0480274	0.0196886	-0.155295	-0.12858	0.207237	0.135731					-0.00563095	0.168041	0.0358264
29.0144	0.252726	0.00401138	0.0280067	0.284699	0.0837764	0.0416851	-0.334508	-0.0401315	0.00779301	0.0170521	-0.15764	-0.24902	-0.2924	0.216712	-0.165033	0.0342105	0.0407855	0.0279686	-0.160248	-0.143775	0.18416	0.150516					-0.00766612	0.167893	0.035795
29.1127	0.252368	-0.00308292	0.0201786	0.28781	0.0869855	0.0428159	-0.329611	-0.04547	0.00590551	0.00704445	-0.147756	-0.252845	-0.296936	0.219478	-0.159188	0.0247604	0.0311433	0.0371711	-0.163382	-0.15593	0.164027	0.167239					-0.00942146	0.168074	0.0358335
29.211	0.249121	-0.00928339	0.0156303	0.289222	0.0868611	0.0417815	-0.324119	-0.0524684	0.00384195	-0.000789115	-0.136068	-0.26043	-0.301691	0.21887	-0.154857	0.015826	0.0222399	0.0446048	-0.164556	-0.169685	0.145198	0.184891					-0.01163	0.168319	0.0358858
29.3093	0.243602	-0.01522	0.0106517	0.29019	0.0887706	0.037473	-0.320224	-0.0573401	0.00258204	-0.00623002	-0.127906	-0.269031	-0.309069	0.2185	-0.150964	0.00830228	0.0110139	0.0513202	-0.160771	-0.178917	0.130817	0.203747					-0.0135774	0.169103	0.0360528
29.4076	0.236041	-0.0196405	0.00763149	0.291417	0.0896919	0.0309558	-0.316078	-0.0631197	0.00168779	-0.0126508	-0.125076	-0.278728	-0.31327	0.218434	-0.146821	-0.000926653	0.00296972	0.0597422	-0.156005	-0.187648	0.11729	0.225453					-0.0153931	0.170211	0.0362892
29.5059	0.226273	-0.023143	0.00568302	0.293087	0.0891969	0.023099	-0.30961	-0.0690053	0.00175171	-0.0179671	-0.118337	-0.288265	-0.314628	0.216442	-0.138555	-0.0099856	-0.00479208	0.0661502	-0.15319	-0.194222	0.105207	0.243773					-0.0168654	0.170449	0.0363398
29.6042	0.215372	-0.0270013	0.00716869	0.296514	0.0846987	0.0189413	-0.30108	-0.0742816	0.00678028	-0.0244716	-0.109201	-0.297254	-0.314291	0.216404	-0.129491	-0.0148835	-0.0138955	0.0743307	-0.154645	-0.201391	0.100099	0.257208					-0.0174713	0.170822	0.0364194
29.7026	0.205013	-0.0282197	0.00865045	0.300006	0.0815232	0.0164594	-0.291081	-0.0796001	0.0079932	-0.0314484	-0.107672	-0.307427	-0.310262	0.2183	-0.12097	-0.0158661	-0.0255609	0.0852073	-0.155765	-0.206508	0.0960172	0.267502					-0.0178959	0.171279	0.0365167
29.8009	0.196569	-0.0287338	0.00923003	0.306227	0.0771035	0.014695	-0.277558	-0.0840302	0.00726756	-0.0382201	-0.105634	-0.319005	-0.305287	0.219527	-0.109477	-0.0175938	-0.0387351	0.0969795	-0.156485	-0.214095	0.0884217	0.273718					-0.0184143	0.171652	0.0365964
29.8992	0.187748	-0.029142	0.0103865	0.313891	0.0739241	0.013442	-0.26205	-0.0863906	0.00875416	-0.0409447	-0.105449	-0.33041	-0.299097	0.216488	-0.0948986	-0.0178654	-0.0516565	0.109928	-0.156108	-0.217252	0.0902144	0.280499					-0.0175449	0.171964	0.0366628
29.9975	0.174149	-0.0282348	0.00874137	0.320615	0.0704369	0.0123769	-0.246079	-0.0861754	0.00904616	-0.0432753	-0.10328	-0.343572	-0.29147	0.209205	-0.0799647	-0.0197732	-0.0661523	0.124452	-0.159285	-0.216102	0.0945943	0.281447					-0.0171954	0.171471	0.0365578
30.0958	0.161241	-0.0264519	0.00431854	0.325795	0.0656079	0.0130694	-0.233711	-0.0800847	0.00981958	-0.043231	-0.0965395	-0.360122	-0.281946	0.201545	-0.0676107	-0.0228035	-0.0795953	0.13996	-0.164153	-0.218604	0.0948598	0.278297					-0.0172881	0.171236	0.0365076
30.1941	0.149659	-0.0245181	0.00108507	0.331145	0.0593342	0.0129509	-0.222231	-0.0719055	0.0105434	-0.0422066	-0.0891258	-0.372602	-0.273785	0.194245	-0.0584922	-0.0226844	-0.0901671	0.152214	-0.165483	-0.22245	0.0974906	0.262891					-0.0174588	0.170063	0.0362576
30.2924	0.138473	-0.0211747	-0.0009419	0.33744	0.0533004	0.0132792	-0.212549	-0.0649681	0.0110693	-0.0390821	-0.0830267	-0.384094	-0.2673	0.187679	-0.0507225	-0.0211325	-0.0935905	0.1652	-0.16742	-0.225869	0.0995131	0.248356					-0.0171618	0.169474	0.0361319
30.3907	0.125006	-0.0172891	-0.000595612	0.345991	0.0469618	0.015307	-0.203322	-0.0587298	0.012215	-0.0364137	-0.0780192	-0.394297	-0.261966	0.17764	-0.0421245	-0.0203709	-0.0959419	0.17727	-0.169544	-0.222979	0.103072	0.238562					-0.016344	0.169091	0.0360504
30.489	0.112186	-0.011858	0.00106166	0.356074	0.0386914	0.0186392	-0.192564	-0.0540654	0.0143118	-0.0337599	-0.0772161	-0.405426	-0.256763	0.1681	-0.0340982	-0.0204457	-0.0986911	0.190422	-0.169418	-0.219175	0.102967	0.221558					-0.015885	0.168642	0.0359547
30.5873	0.101061	-0.00467122	0.00842582	0.366508	0.0324489	0.022753	-0.176261	-0.0486146	0.0172121	-0.0337201	-0.0823015	-0.415364	-0.252351	0.155897	-0.0244694	-0.0206069	-0.10144	0.205998	-0.164483	-0.215762	0.0981558	0.204896					-0.0148495	0.168209	0.0358624
30.6856	0.0881246	0.00383279	0.0193587	0.371314	0.0313671	0.0276335	-0.161147	-0.0436281	0.0181553	-0.0358863	-0.0815642	-0.424137	-0.251108	0.144315	-0.0152093	-0.0211535	-0.103924	0.223817	-0.159872	-0.212116	0.0899943	0.191058					-0.0136716	0.167916	0.0357998
30.7839	0.0741043	0.0120967	0.0310138	0.374066	0.0330745	0.0346771	-0.148709	-0.0399947	0.0149185	-0.037322	-0.0798741	-0.43304	-0.252405	0.129718	-0.010043	-0.0245241	-0.106832	0.238745	-0.158565	-0.208803	0.0834374	0.165238					-0.0140465	0.167382	0.035686
30.8822	0.0574296	0.0184398	0.0435862	0.378611	0.0275207	0.0417746	-0.13947	-0.0329965	0.011636	-0.0358957	-0.0812797	-0.443839	-0.255671	0.112811	-0.00786873	-0.0282268	-0.11014	0.255359	-0.156684	-0.203793	0.0865487	0.142197					-0.0145431	0.168196	0.0358596
30.9805	0.042537	0.0258347	0.0581796	0.383084	0.0220815	0.0478319	-0.129719	-0.0276446	0.00754723	-0.0314535	-0.0829274	-0.452352	-0.260872	0.0943783	-0.00695757	-0.028773	-0.108773	0.269357	-0.152846	-0.195992	0.0957058	0.120976					-0.0141272	0.169079	0.0360477
31.0788	0.0282683	0.0319611	0.0747823	0.384524	0.017062	0.0541975	-0.123242	-0.0189764	0.00328011	-0.0254365	-0.0898367	-0.457676	-0.267781	0.0755373	-0.00552531	-0.0297406	-0.10713	0.278653	-0.150502	-0.187925	0.103855	0.102259					-0.0140633	0.169834	0.0362086
31.1771	0.0131562	0.0368884	0.0880991	0.386152	0.0118923	0.0595318	-0.113127	-0.00835836	-0.000795398	-0.0181916	-0.09423	-0.462076	-0.272921	0.0585894	-0.00247826	-0.0268581	-0.102346	0.286979	-0.150705	-0.181718	0.10955	0.0831659					-0.0136273	0.170525	0.036356
31.2754	-0.00202526	0.0407884	0.101	0.388534	0.00938537	0.0663126	-0.103164	0.00342151	-0.00584181	-0.0107196	-0.0983666	-0.464624	-0.277197	0.0441345	0.000704373	-0.0260779	-0.0988328	0.293983	-0.15246	-0.175033	0.116367	0.0621708					-0.01307	0.171472	0.0365579
31.3737	-0.0152535	0.044769	0.116051	0.392595	0.00487832	0.0756354	-0.0920796	0.0144735	-0.0106691	-0.00382088	-0.102738	-0.463432	-0.278945	0.0299221	0.00404156	-0.0283744	-0.0944244	0.299853	-0.158362	-0.17055	0.123291	0.0417257					-0.012337	0.172658	0.0368107
31.472	-0.0270864	0.0463621	0.12708	0.394621	0.00228979	0.0853979	-0.0786003	0.0294795	-0.0167315	0.00428163	-0.105609	-0.459627	-0.282203	0.0159712	0.00575499	-0.0292699	-0.0919495	0.30446	-0.166969	-0.166945	0.130034	0.0169343					-0.0119238	0.173672	0.037027
31.5703	-0.0349239	0.0479049	0.134659	0.395753	0.00326746	0.0964175	-0.0674127	0.0452298	-0.0215978	0.00898505	-0.111465	-0.454811	-0.287286	0.00590667	0.00725405	-0.0311342	-0.0908401	0.308583	-0.170005	-0.162573	0.136953	-0.00663775					-0.0112624	0.174824	0.0372726
31.6686	-0.0418613	0.0503106	0.141748	0.394634	0.00884918	0.104944	-0.0585885	0.0595035	-0.030092	0.0126398	-0.11818	-0.453405	-0.294129	-0.00332164	0.00747924	-0.035842	-0.0893287	0.309464	-0.167181	-0.157787	0.14135	-0.0273823					-0.0111897	0.175967	0.0375163
31.7669	-0.0491546	0.0496769	0.147222	0.392969	0.0145055	0.115288	-0.05219	0.0739936	-0.0328501	0.0151967	-0.120597	-0.45086	-0.30181	-0.0117114	0.00659293	-0.0413571	-0.0844219	0.308907	-0.163057	-0.154465	0.145571	-0.0476141					-0.0109166	0.176921	0.0377198
31.8652	-0.0581552	0.0502414	0.152194	0.389265	0.0212349	0.124755	-0.0506057	0.0867636	-0.031853	0.0179318	-0.125034	-0.446546	-0.309442	-0.0175689	0.00406588	-0.0444272	-0.0751691	0.307904	-0.158066	-0.149261	0.156254	-0.0647667					-0.0100129	0.17777	0.0379007
31.9635	-0.0678195	0.0510454	0.157001	0.38189	0.0262703	0.133219	-0.0501117	0.0984314	-0.0359441	0.0189487	-0.126487	-0.445047	-0.314322	-0.0184211	0.000145691	-0.0487325	-0.0644542	0.306156	-0.153949	-0.147224	0.161425	-0.0778605					-0.00981092	0.178227	0.0379981
32.0618	-0.0752017	0.0471426	0.163853	0.375207	0.0351468	0.141422	-0.0513542	0.109221	-0.0395248	0.0229384	-0.12939	-0.438418	-0.320268	-0.0175285	-0.00453765	-0.0532504	-0.0516863	0.304421	-0.145999	-0.151283	0.166547	-0.0834932					-0.00891071	0.178452	0.0380461
32.1602	-0.0832241	0.042891	0.171209	0.369123	0.0446145	0.147208	-0.0512908	0.118307	-0.041174	0.0256285	-0.135281	-0.428121	-0.326111	-0.0169016	-0.00846929	-0.0590618	-0.0423293	0.300792	-0.13433	-0.153262	0.170948	-0.0846205					-0.00788425	0.178067	0.0379639
32.2585	-0.0916664	0.0397578	0.173404	0.363331	0.0541865	0.152888	-0.055212	0.126709	-0.0421631	0.0282827	-0.141832	-0.420046	-0.328566	-0.0149193	-0.0102518	-0.0677642	-0.0384546	0.299156	-0.121638	-0.15438	0.175769	-0.0771968					-0.00684577	0.177727	0.0378914
32.3568	-0.0990178	0.0344984	0.174374	0.356124	0.0619473	0.158249	-0.0618989	0.137744	-0.0409842	0.0297982	-0.145351	-0.41427	-0.330761	-0.0124247	-0.0106938	-0.0770915	-0.0391971	0.295938	-0.110056	-0.155063	0.18075	-0.0719608					-0.00633397	0.177492	0.0378415
32.4551	-0.106002	0.0278435	0.17486	0.347746	0.0694491	0.161964	-0.0693067	0.150113	-0.0379527	0.0295831	-0.144389	-0.409516	-0.331007	-0.00693747	-0.0126375	-0.0853504	-0.038788	0.292859	-0.100742	-0.159662	0.189851	-0.0736368					-0.00598451	0.177537	0.0378509
32.5534	-0.110273	0.0184989	0.173614	0.340801	0.0774077	0.161352	-0.0789032	0.162751	-0.0361344	0.0305305	-0.143814	-0.404637	-0.328893	3.81648e-05	-0.0151278	-0.0938141	-0.0342735	0.288145	-0.0909023	-0.166706	0.200312	-0.0668009					-0.00531037	0.177304	0.0378013
32.6517	-0.114612	0.00550496	0.16539	0.333911	0.0842473	0.15906	-0.0925982	0.176387	-0.0376808	0.0348026	-0.14017	-0.399219	-0.325878	0.00801131	-0.0187547	-0.103431	-0.0282186	0.281367	-0.083912	-0.171788	0.216676	-0.0645696					-0.00524888	0.17711	0.0377599
32.75	-0.116737	-0.00782179	0.153597	0.329315	0.0884413	0.154748	-0.1085	0.190834	-0.0375095	0.0428018	-0.135457	-0.396503	-0.318461	0.0158026	-0.0224074	-0.114479	-0.0223007	0.270349	-0.0785848	-0.176777	0.233331	-0.0645026					-0.00549184	0.176933	0.0377223
32.8483	-0.117652	-0.021183	0.142705	0.326376	0.0916136	0.148611	-0.124775	0.2058	-0.0354289	0.0487708	-0.131375	-0.393063	-0.308669	0.0269089	-0.0228483	-0.122944	-0.0167691	0.258918	-0.0727024	-0.179415	0.251394	-0.0576961					-0.00470108	0.17677	0.0376874
32.9466	-0.116432	-0.0329091	0.130446	0.323945	0.0991833	0.142622	-0.141252	0.216872	-0.0345603	0.0536403	-0.124527	-0.388628	-0.296622	0.039936	-0.0187078	-0.129417	-0.012317	0.244935	-0.0681106	-0.183013	0.267062	-0.0492526					-0.0035048	0.176172	0.03756
33.0449	-0.116436	-0.0436077	0.116479	0.321906	0.104329	0.136457	-0.160311	0.226152	-0.0320419	0.055954	-0.116112	-0.384854	-0.284453	0.0545327	-0.0159828	-0.135937	-0.0126958	0.232072	-0.0651718	-0.186618	0.280457	-0.0448673					-0.00321588	0.175927	0.0375078
33.1432	-0.117315	-0.0533578	0.10268	0.319674	0.109557	0.129962	-0.178133	0.231855	-0.0295112	0.055868	-0.103532	-0.381026	-0.26979	0.0689507	-0.0154091	-0.142214	-0.0115228	0.222024	-0.0642144	-0.190372	0.294362	-0.0406934					-0.00282532	0.175751	0.0374702
33.2415	-0.116369	-0.0610006	0.0910755	0.315639	0.116328	0.122553	-0.200742	0.236161	-0.0259801	0.0547476	-0.0917084	-0.377999	-0.25462	0.0825673	-0.0151077	-0.151726	-0.00912441	0.210992	-0.0638929	-0.193052	0.310809	-0.0371819					-0.00261968	0.176256	0.0375779
33.3398	-0.113782	-0.065996	0.0774819	0.311698	0.121339	0.112047	-0.224299	0.239421	-0.0198845	0.0517667	-0.0822048	-0.374627	-0.240316	0.0955699	-0.0113659	-0.16072	-0.00573483	0.203126	-0.0643752	-0.19565	0.325653	-0.0337809					-0.00248336	0.176991	0.0377346
33.4381	-0.113031	-0.0706157	0.0622394	0.30488	0.130163	0.101204	-0.247005	0.243315	-0.0145458	0.0475236	-0.0696523	-0.374523	-0.227839	0.107957	-0.00863582	-0.167411	-0.00223439	0.193954	-0.0641029	-0.199483	0.338835	-0.029453					-0.00265724	0.178158	0.0379835
33.5364	-0.111935	-0.0734112	0.049367	0.301799	0.13925	0.0906334	-0.270625	0.242534	-0.00714732	0.0450088	-0.057169	-0.376237	-0.214701	0.118614	-0.00511305	-0.17325	0.000624143	0.182742	-0.0618018	-0.204231	0.350753	-0.0211659					-0.00252097	0.179706	0.0383134
33.6347	-0.113074	-0.078075	0.0369281	0.296625	0.147325	0.0781263	-0.291869	0.23987	-0.000136106	0.0438702	-0.0451609	-0.376543	-0.202419	0.126142	-0.00376426	-0.179821	0.00507932	0.173618	-0.0624426	-0.208513	0.359709	-0.0123787					-0.00304106	0.180986	0.0385864
33.733	-0.115555	-0.0840929	0.0226372	0.290443	0.150654	0.064249	-0.311533	0.23884	0.00548616	0.0429462	-0.0319516	-0.373225	-0.190389	0.131365	-0.00258835	-0.18595	0.0115255	0.166458	-0.0645167	-0.210946	0.369815	-0.00207079					-0.00356365	0.182095	0.0388227
33.8313	-0.118026	-0.0887227	0.00984788	0.283318	0.154599	0.0491484	-0.331793	0.236867	0.00770118	0.042496	-0.0200569	-0.370981	-0.176209	0.135042	-0.000282872	-0.19331	0.0158859	0.159077	-0.066693	-0.214589	0.379356	0.00906078					-0.00446651	0.183506	0.0391235
33.9296	-0.12121	-0.0950076	-0.00380103	0.276521	0.156691	0.035748	-0.347895	0.236409	0.0079332	0.0416236	-0.00592325	-0.368992	-0.162475	0.137746	0.00197832	-0.202354	0.0175728	0.151474	-0.0698144	-0.219386	0.382777	0.0226426					-0.00580641	0.184613	0.0393596
34.0279	-0.121827	-0.102292	-0.0161999	0.27256	0.159285	0.0236109	-0.361534	0.235461	0.0112877	0.0416298	0.00598286	-0.363645	-0.151272	0.13733	0.00321321	-0.210139	0.0186508	0.144597	-0.0718695	-0.223613	0.388373	0.0331519					-0.00669352	0.185785	0.0396094
34.1262	-0.121315	-0.104913	-0.0264926	0.265774	0.157904	0.0115184	-0.372988	0.232392	0.0146887	0.0378746	0.0169068	-0.363415	-0.138549	0.138225	0.00454885	-0.214624	0.0200041	0.135975	-0.0742289	-0.222564	0.393696	0.0402375					-0.00769748	0.186217	0.0397017
34.2245	-0.120341	-0.107541	-0.0354788	0.257115	0.154583	0.00145502	-0.384381	0.227112	0.0151749	0.0363647	0.0302765	-0.366608	-0.124574	0.138523	0.0060934	-0.216901	0.0246545	0.127621	-0.0800236	-0.222053	0.398801	0.0460432					-0.00882198	0.186762	0.0398177
34.3228	-0.118031	-0.111154	-0.0402598	0.250647	0.151138	-0.00841552	-0.390544	0.219882	0.0156578	0.03662	0.0461923	-0.369963	-0.112431	0.135934	0.0062127	-0.218844	0.0325505	0.117671	-0.0877475	-0.218668	0.401021	0.0495257					-0.00968206	0.186571	0.039777
34.4211	-0.115985	-0.114011	-0.0452488	0.242995	0.148948	-0.0148726	-0.391755	0.21112	0.0164765	0.0355688	0.0598508	-0.369543	-0.100112	0.130503	0.00707231	-0.222801	0.0424955	0.110484	-0.0940618	-0.213656	0.40507	0.0557646					-0.00980438	0.185865	0.0396265
34.5194	-0.114279	-0.113879	-0.0501594	0.234361	0.148322	-0.0201485	-0.391889	0.203178	0.0133415	0.0368513	0.0718755	-0.368463	-0.089735	0.123421	0.0125548	-0.229313	0.0495587	0.10315	-0.0985347	-0.209141	0.405329	0.0678538					-0.00980658	0.184951	0.0394317
34.6178	-0.114278	-0.113182	-0.0536753	0.224593	0.148632	-0.0229024	-0.391517	0.193264	0.00886297	0.0361386	0.0846914	-0.366104	-0.0840635	0.114009	0.0186649	-0.235793	0.0547038	0.0959227	-0.10295	-0.201133	0.403157	0.0721936					-0.0104894	0.183355	0.0390914
34.7161	-0.114814	-0.109807	-0.0563269	0.215818	0.149093	-0.0239538	-0.388731	0.180105	0.00735088	0.0344036	0.0982567	-0.365262	-0.0801864	0.103628	0.0255105	-0.241912	0.0590296	0.0902491	-0.10304	-0.197444	0.39581	0.0817773					-0.0109294	0.181402	0.038675
34.8144	-0.116171	-0.107725	-0.0600082	0.209583	0.14924	-0.0235111	-0.383984	0.166905	0.00772737	0.0302012	0.107755	-0.362408	-0.0805748	0.0949732	0.0329993	-0.244318	0.0614096	0.087971	-0.101182	-0.192249	0.389576	0.0938245					-0.0109075	0.179346	0.0382367
34.9127	-0.117247	-0.106458	-0.064864	0.201574	0.149222	-0.0236587	-0.377641	0.154865	0.00824123	0.0262076	0.117643	-0.359271	-0.0815174	0.0851137	0.0373864	-0.24616	0.0656873	0.0877657	-0.0970668	-0.188737	0.379672	0.104192					-0.0111387	0.176871	0.037709
35.011	-0.118975	-0.104066	-0.0682047	0.191849	0.149018	-0.0222082	-0.369312	0.145738	0.0100199	0.0223661	0.125539	-0.358893	-0.0843361	0.0733306	0.0382797	-0.250788	0.0718565	0.0871063	-0.0893371	-0.185374	0.366412	0.114769					-0.0116005	0.174298	0.0371604
35.1093	-0.121558	-0.10108	-0.0714346	0.182848	0.148626	-0.0183162	-0.35779	0.140569	0.0106761	0.0189217	0.129571	-0.359326	-0.0869605	0.0631008	0.0437349	-0.255122	0.0802784	0.0862291	-0.0806361	-0.182104	0.348248	0.124345					-0.0116899	0.171348	0.0365316
35.2076	-0.122133	-0.0975219	-0.0767343	0.176461	0.146812	-0.0151369	-0.343939	0.136382	0.0123648	0.0170391	0.131186	-0.362422	-0.0920444	0.0525871	0.0506197	-0.257891	0.0891577	0.0871109	-0.0692006	-0.178623	0.330704	0.131315					-0.0115412	0.168597	0.0359451
35.3059	-0.120413	-0.094054	-0.0821509	0.170063	0.141301	-0.0111638	-0.326346	0.130569	0.0132396	0.0150049	0.131845	-0.365946	-0.100351	0.0402034	0.0575604	-0.260963	0.0934518	0.0874887	-0.0555416	-0.177637	0.31116	0.135961					-0.0121235	0.165221	0.0352253
35.4042	-0.117668	-0.0932739	-0.0841372	0.164072	0.135809	-0.0042538	-0.306593	0.127292	0.011431	0.0129294	0.132803	-0.369928	-0.109702	0.0267424	0.0609966	-0.263291	0.0972604	0.0867856	-0.0385998	-0.176564	0.294418	0.143877					-0.0122543	0.162301	0.0346028
35.5025	-0.115398	-0.0933174	-0.0856956	0.161676	0.124206	0.00211724	-0.287403	0.12233	0.00935199	0.0133415	0.130847	-0.37352	-0.118761	0.0152302	0.0644619	-0.265909	0.101974	0.0887378	-0.0202728	-0.173426	0.277241	0.149122					-0.0124122	0.159413	0.0339871
35.6008	-0.114612	-0.091374	-0.0881834	0.157178	0.109655	0.0102891	-0.269381	0.120218	0.00606417	0.0115811	0.127278	-0.377988	-0.128394	0.00763909	0.067785	-0.270091	0.106486	0.0921255	-0.000465494	-0.169702	0.265415	0.149333					-0.0126883	0.157289	0.0335341
35.6991	-0.113454	-0.0870404	-0.0872676	0.156675	0.0931309	0.0226713	-0.250798	0.118519	0.00184537	0.0105468	0.123856	-0.384717	-0.136779	-5.77452e-06	0.0715226	-0.272256	0.109426	0.0950081	0.0174616	-0.169052	0.257358	0.150403					-0.0124066	0.156017	0.0332628
35.7974	-0.110748	-0.0817592	-0.0841147	0.159815	0.0783149	0.0370662	-0.230294	0.116275	-0.00154084	0.0100869	0.120385	-0.392265	-0.146589	-0.00645699	0.0764348	-0.274022	0.109087	0.0976455	0.0323344	-0.171727	0.246068	0.149181					-0.0121284	0.154933	0.0330319
35.8957	-0.107818	-0.0758312	-0.0802644	0.165038	0.0631997	0.0515144	-0.207418	0.115829	-0.00367	0.0101721	0.116314	-0.401151	-0.158269	-0.0123801	0.0790284	-0.274204	0.110336	0.100614	0.044212	-0.173477	0.235129	0.151166					-0.0114514	0.15447	0.0329332
35.994	-0.1036	-0.0692367	-0.0746672	0.16951	0.049921	0.0634137	-0.186749	0.114961	-0.00390603	0.0090328	0.108942	-0.409973	-0.169044	-0.0191604	0.0811911	-0.2739	0.111264	0.103895	0.0529017	-0.174186	0.227383	0.148377					-0.011074	0.154092	0.0328525
36.0923	-0.103256	-0.0611708	-0.0694739	0.174103	0.0345981	0.073752	-0.167806	0.112193	-0.00163961	0.00640906	0.100621	-0.420307	-0.180185	-0.0237166	0.0839292	-0.274472	0.110473	0.10674	0.0590046	-0.171013	0.21692	0.139097					-0.0115999	0.153582	0.0327439
36.1906	-0.103078	-0.0539423	-0.0673468	0.179917	0.02066	0.0839146	-0.151232	0.112331	0.00148555	0.00455226	0.0930609	-0.427589	-0.193705	-0.028503	0.0862657	-0.277226	0.107272	0.110618	0.0617466	-0.170323	0.207124	0.129597					-0.0124728	0.153798	0.0327898
36.2889	-0.10335	-0.0461335	-0.0643288	0.185525	0.00801841	0.0959046	-0.135002	0.115528	0.00685353	-0.000726795	0.0847837	-0.431721	-0.211798	-0.0325399	0.0902225	-0.27847	0.101138	0.114502	0.0636288	-0.167058	0.198542	0.119668					-0.0130369	0.154143	0.0328634
36.3872	-0.106036	-0.038974	-0.0642155	0.188505	-0.0034029	0.1109	-0.120097	0.121022	0.0110466	-0.00869674	0.0727771	-0.437122	-0.232527	-0.033578	0.0945057	-0.279214	0.0924062	0.121297	0.0658545	-0.165759	0.187366	0.109175					-0.0143076	0.155219	0.0330928
36.4855	-0.109342	-0.0305577	-0.0644228	0.192737	-0.0145516	0.120525	-0.107901	0.127038	0.0121352	-0.0147482	0.0617012	-0.443737	-0.255442	-0.0326045	0.0965573	-0.27776	0.0819167	0.126409	0.0683004	-0.165685	0.173521	0.0984912					-0.0162464	0.15658	0.0333829
36.5838	-0.11157	-0.024143	-0.0674487	0.198553	-0.0281402	0.129801	-0.0966956	0.132657	0.0181683	-0.020771	0.0494933	-0.449891	-0.277544	-0.0310857	0.0952876	-0.273416	0.0722946	0.133163	0.0697128	-0.166352	0.160137	0.0780376					-0.0186251	0.157917	0.033668
36.6821	-0.114205	-0.0158752	-0.0704423	0.202989	-0.0413696	0.140036	-0.0862082	0.142266	0.0253899	-0.0248526	0.0377884	-0.455473	-0.2979	-0.0292389	0.0958216	-0.269471	0.0613826	0.139916	0.0704007	-0.172966	0.14647	0.0584027					-0.020779	0.160054	0.0341236
36.7804	-0.117687	-0.00711254	-0.0700573	0.204179	-0.0552009	0.148394	-0.0791398	0.154242	0.0303601	-0.0272817	0.021494	-0.457681	-0.315465	-0.025422	0.0973421	-0.263621	0.0499514	0.145278	0.0643628	-0.17548	0.13654	0.0397246					-0.0228309	0.161477	0.034427
36.8787	-0.122075	0.00369848	-0.0693239	0.201708	-0.0692652	0.155913	-0.0703702	0.166905	0.0319335	-0.0281435	0.00389495	-0.459157	-0.330057	-0.0240183	0.0964276	-0.259203	0.0395993	0.148436	0.0553951	-0.180161	0.125508	0.0180789					-0.0256489	0.162608	0.0346681
36.977	-0.128308	0.0155118	-0.0654719	0.201451	-0.0803109	0.162376	-0.062667	0.178856	0.0330969	-0.0274211	-0.0146046	-0.461537	-0.345692	-0.0245891	0.0982155	-0.254575	0.0280617	0.151679	0.045142	-0.181536	0.114687	-0.00491996					-0.028298	0.164357	0.0350411
37.0754	-0.132229	0.0261629	-0.0610448	0.202095	-0.0918015	0.166834	-0.0568673	0.188984	0.0348262	-0.0250652	-0.029909	-0.458396	-0.357474	-0.0235483	0.10224	-0.245518	0.0159128	0.156973	0.0318883	-0.182214	0.10582	-0.0315625					-0.0301769	0.165304	0.0352429
37.1737	-0.133168	0.0351151	-0.0558689	0.203531	-0.102358	0.168866	-0.0531569	0.197196	0.038149	-0.0219056	-0.0431156	-0.45275	-0.370196	-0.024758	0.101961	-0.237602	0.00219541	0.161291	0.0185153	-0.183307	0.101702	-0.0516046					-0.0318759	0.166258	0.0354464
37.272	-0.13584	0.0433969	-0.0474168	0.202936	-0.110405	0.171456	-0.0515951	0.204709	0.0398981	-0.0203379	-0.0544164	-0.443092	-0.381547	-0.0253944	0.102089	-0.231831	-0.0131694	0.161717	0.0036773	-0.183691	0.0953615	-0.0675914					-0.0336857	0.166568	0.0355125
37.3703	-0.141137	0.0508273	-0.0390554	0.204118	-0.114767	0.1728	-0.0546579	0.215913	0.0411777	-0.0186007	-0.0645821	-0.432348	-0.390982	-0.0238582	0.100077	-0.223944	-0.0260063	0.163418	-0.0130751	-0.1817	0.091589	-0.0800384					-0.034765	0.167039	0.0356127
37.4686	-0.149065	0.0605074	-0.0325805	0.205322	-0.116585	0.174498	-0.060167	0.225145	0.0433583	-0.0173302	-0.0749647	-0.419534	-0.399077	-0.0212703	0.0998081	-0.215713	-0.038227	0.163096	-0.0297064	-0.180256	0.0846705	-0.0937535					-0.035992	0.167382	0.0356859
37.5669	-0.155399	0.0714186	-0.0267782	0.203924	-0.114251	0.176175	-0.0661506	0.234193	0.0475495	-0.0199343	-0.0852554	-0.405688	-0.407661	-0.0220258	0.0996143	-0.206064	-0.0534951	0.16199	-0.0453876	-0.179848	0.0788175	-0.104294					-0.0372069	0.167681	0.0357498
37.6652	-0.159383	0.0800021	-0.0204293	0.203619	-0.108097	0.17395	-0.0746195	0.241152	0.0520531	-0.0221005	-0.0935513	-0.390895	-0.418421	-0.0260219	0.100706	-0.195858	-0.0666395	0.162445	-0.0622452	-0.179048	0.0698424	-0.108338					-0.0382671	0.167808	0.0357768
37.7635	-0.164464	0.0873905	-0.0151328	0.201711	-0.10062	0.167604	-0.0842882	0.250317	0.0561892	-0.0250545	-0.101418	-0.37558	-0.428684	-0.026849	0.102551	-0.185928	-0.0786827	0.162878	-0.0777522	-0.174397	0.0647502	-0.112842					-0.0390137	0.167997	0.0358172
37.8618	-0.169857	0.0947404	-0.012489	0.197613	-0.0918978	0.159113	-0.0956797	0.259528	0.0612294	-0.0277545	-0.110511	-0.361541	-0.436036	-0.0270924	0.105393	-0.174498	-0.0884128	0.162581	-0.0905746	-0.168575	0.0630368	-0.117989					-0.0395306	0.168085	0.0358358
37.9601	-0.177742	0.100865	-0.0121415	0.193421	-0.0841711	0.150018	-0.10674	0.266606	0.0669085	-0.031341	-0.119903	-0.342505	-0.444393	-0.0276949	0.113027	-0.164368	-0.098268	0.161473	-0.0997798	-0.16246	0.063632	-0.124686					-0.0400111	0.168284	0.0358783
38.0584	-0.18591	0.10672	-0.0126195	0.188363	-0.0768274	0.140661	-0.116369	0.273292	0.0713313	-0.0336379	-0.12621	-0.323293	-0.452767	-0.0266592	0.122025	-0.156204	-0.107392	0.159506	-0.106515	-0.156983	0.0609919	-0.128007					-0.0402956	0.168486	0.0359213
38.1567	-0.190439	0.112959	-0.0148883	0.182868	-0.0657956	0.130383	-0.127513	0.283242	0.0740897	-0.034388	-0.132291	-0.305402	-0.460643	-0.0286893	0.130654	-0.148137	-0.114714	0.156235	-0.108234	-0.154755	0.0605335	-0.122472					-0.0398817	0.168803	0.035989
38.255	-0.197772	0.117399	-0.016977	0.179152	-0.0562349	0.120622	-0.136552	0.292343	0.0761245	-0.0329132	-0.138195	-0.289646	-0.468146	-0.0303255	0.140897	-0.139436	-0.119671	0.152399	-0.108421	-0.151562	0.0630385	-0.120671					-0.0392976	0.16965	0.0361694
38.3533	-0.204751	0.120518	-0.0225092	0.178709	-0.0441579	0.10676	-0.144893	0.299479	0.077514	-0.0262979	-0.147165	-0.276065	-0.471537	-0.0301698	0.149047	-0.131466	-0.123482	0.14815	-0.106372	-0.150652	0.0667452	-0.121384					-0.0388173	0.170226	0.0362923
38.4516	-0.207106	0.125688	-0.0251699	0.179748	-0.0326248	0.0884747	-0.153786	0.30665	0.0819217	-0.0182121	-0.156623	-0.260679	-0.472864	-0.0307228	0.156384	-0.121407	-0.124867	0.141179	-0.104831	-0.150356	0.0784984	-0.117932					-0.0372107	0.170588	0.0363694
38.5499	-0.208963	0.128716	-0.026403	0.180949	-0.0215646	0.073667	-0.15936	0.313786	0.0893141	-0.0103297	-0.167199	-0.247264	-0.471868	-0.0309231	0.162333	-0.111571	-0.124025	0.133828	-0.103461	-0.1496	0.0970176	-0.116867					-0.0349904	0.171296	0.0365203
38.6482	-0.208033	0.132006	-0.0243965	0.181172	-0.00810226	0.058166	-0.161972	0.319587	0.0906988	-0.00282797	-0.17915	-0.233029	-0.470758	-0.0293196	0.166022	-0.103254	-0.122724	0.123698	-0.10088	-0.146633	0.118251	-0.104767					-0.032102	0.171305	0.0365223
38.7465	-0.20577	0.134184	-0.0224957	0.182168	0.00349898	0.041774	-0.161669	0.32111	0.0918965	0.00251456	-0.195094	-0.220583	-0.468466	-0.0255881	0.165979	-0.0941765	-0.121706	0.114083	-0.0998283	-0.139607	0.14349	-0.0885477					-0.0292197	0.17105	0.036468
38.8448	-0.201886	0.136445	-0.0214075	0.185889	0.0156352	0.0272355	-0.157648	0.320274	0.0960777	0.00517462	-0.206146	-0.212263	-0.46748	-0.0238799	0.162498	-0.0857777	-0.120633	0.105424	-0.0956484	-0.133961	0.166822	-0.0748174					-0.026367	0.17101	0.0364594
38.9431	-0.194884	0.137228	-0.0195872	0.190945	0.0304685	0.0127545	-0.157692	0.316265	0.10219	0.00734008	-0.215854	-0.204096	-0.468233	-0.019789	0.159313	-0.0774357	-0.118799	0.0982765	-0.0854949	-0.127375	0.19078	-0.0580126					-0.0228042	0.171228	0.0365059
39.0414	-0.187249	0.13727	-0.0193441	0.193105	0.0421291	0.000914873	-0.156428	0.308847	0.107988	0.0101483	-0.227284	-0.19727	-0.467049	-0.0148501	0.155687	-0.0707378	-0.116208	0.0910256	-0.0757116	-0.124312	0.213463	-0.0379271					-0.0197179	0.171168	0.0364931
39.1397	-0.182537	0.138662	-0.0208256	0.194606	0.0545101	-0.010774	-0.153049	0.302807	0.114807	0.00814271	-0.243152	-0.194974	-0.471268	-0.00977869	0.151929	-0.0689387	-0.113457	0.0838537	-0.0661383	-0.121527	0.231345	-0.018303					-0.0179117	0.172588	0.036796
39.238	-0.180595	0.141375	-0.0213042	0.192417	0.0689542	-0.0232493	-0.148762	0.297331	0.117395	0.00590394	-0.260484	-0.194812	-0.472629	-0.00375056	0.150363	-0.0661895	-0.110651	0.0792236	-0.0550462	-0.119897	0.250031	-0.00506041					-0.016338	0.174318	0.0371647
39.3363	-0.17752	0.142936	-0.0240679	0.1872	0.0825869	-0.0343978	-0.143556	0.294248	0.121069	0.00593425	-0.279004	-0.197171	-0.474965	0.00193856	0.145937	-0.0623949	-0.109692	0.0778887	-0.044123	-0.118639	0.273837	0.00522112					-0.0148516	0.177	0.0377366
39.4346	-0.171383	0.143885	-0.0285355	0.179413	0.0949234	-0.0453555	-0.132897	0.288563	0.128051	0.00637426	-0.297857	-0.199436	-0.477807	0.00557911	0.143834	-0.0620441	-0.11025	0.0769135	-0.0313514	-0.118255	0.298525	0.0141612					-0.0134068	0.179808	0.0383351
39.533	-0.16442	0.142524	-0.0339853	0.171367	0.105805	-0.0599411	-0.120098	0.282375	0.136621	0.0112836	-0.313589	-0.204177	-0.480546	0.00877726	0.14162	-0.0625726	-0.111403	0.0770337	-0.0216163	-0.117888	0.32517	0.0247108					-0.0119521	0.182971	0.0390095
39.6313	-0.158973	0.137884	-0.0396098	0.162864	0.116529	-0.0744099	-0.105562	0.277096	0.143237	0.0190452	-0.329876	-0.208881	-0.479928	0.0143009	0.139964	-0.064695	-0.109773	0.0763223	-0.0148975	-0.114715	0.351096	0.0367826					-0.0102817	0.185939	0.0396423
39.7296	-0.155522	0.13426	-0.0449524	0.151096	0.124523	-0.0863085	-0.0858268	0.274551	0.150449	0.0246921	-0.349909	-0.213229	-0.475449	0.020132	0.134121	-0.0655303	-0.110735	0.0740653	-0.00866663	-0.110418	0.375515	0.0499762					-0.00878024	0.188834	0.0402595
39.8279	-0.148802	0.131271	-0.0527578	0.135996	0.132926	-0.0974999	-0.0657622	0.271335	0.158672	0.0299605	-0.370342	-0.215908	-0.47146	0.0229832	0.126373	-0.0663106	-0.113135	0.070419	-0.00241377	-0.108574	0.389881	0.0615633					-0.00825392	0.191007	0.0407228
39.9262	-0.142853	0.127609	-0.0569087	0.121681	0.141869	-0.106417	-0.0453735	0.267488	0.1684	0.0367141	-0.391418	-0.218822	-0.465741	0.026258	0.115139	-0.0676407	-0.116895	0.0683751	0.00277255	-0.106126	0.404991	0.0716578					-0.00751085	0.193479	0.0412499
40.0245	-0.134571	0.124164	-0.0580956	0.106772	0.14885	-0.116604	-0.0260978	0.264721	0.176167	0.0451014	-0.409265	-0.22437	-0.458332	0.0301001	0.0984471	-0.0696527	-0.121143	0.0665941	0.00812065	-0.104453	0.418603	0.0783131					-0.00711964	0.195584	0.0416987
40.1228	-0.124468	0.121673	-0.0587875	0.0949638	0.154653	-0.127299	-0.00702692	0.262181	0.18158	0.0556618	-0.429397	-0.231736	-0.451757	0.0336296	0.08162	-0.0687098	-0.124844	0.0635182	0.0133707	-0.103775	0.437478	0.0823698					-0.00659555	0.198885	0.0424024
40.2211	-0.116339	0.1172	-0.0596941	0.0817109	0.158533	-0.135063	0.0150973	0.257191	0.183337	0.0650101	-0.448907	-0.2382	-0.442675	0.039445	0.0642171	-0.0678121	-0.129409	0.0625824	0.0125016	-0.104561	0.457991	0.0823388					-0.00661379	0.201914	0.0430481
40.3194	-0.108033	0.114383	-0.0595943	0.0642309	0.165071	-0.142828	0.036064	0.251477	0.184626	0.0710667	-0.466426	-0.242347	-0.430665	0.043531	0.0443201	-0.0672064	-0.136357	0.0635817	0.0129323	-0.104836	0.475875	0.0902978					-0.00640166	0.20465	0.0436315
40.4177	-0.099981	0.113051	-0.0551944	0.0425333	0.169563	-0.146693	0.0569514	0.244108	0.186115	0.0728101	-0.480769	-0.245349	-0.418437	0.0449978	0.0258006	-0.0682226	-0.143939	0.0671704	0.0100356	-0.106991	0.49595	0.105538					-0.00595235	0.207534	0.0442464
40.516	-0.0957965	0.110416	-0.0518173	0.0191735	0.173398	-0.147948	0.0783897	0.234497	0.184837	0.0754083	-0.492556	-0.247121	-0.403539	0.0455001	0.009637	-0.0707257	-0.15329	0.0726691	0.00873552	-0.109384	0.513051	0.115101					-0.00597115	0.209714	0.0447111
40.6143	-0.0917365	0.108623	-0.0471693	-0.00340994	0.177404	-0.150935	0.096151	0.222041	0.181077	0.0788717	-0.502803	-0.248974	-0.387675	0.0443519	-0.00257397	-0.0723976	-0.162682	0.0799059	0.00378175	-0.113929	0.523083	0.1272					-0.0064452	0.211197	0.0450274
40.7126	-0.0922983	0.104653	-0.043301	-0.0256672	0.180084	-0.151873	0.110671	0.210942	0.182896	0.0800544	-0.509082	-0.252834	-0.372055	0.0406048	-0.00994052	-0.0722797	-0.17089	0.0881632	-0.00225955	-0.119541	0.531705	0.135192					-0.00713882	0.212531	0.0453118
40.8109	-0.0947983	0.0995483	-0.0388874	-0.0473267	0.183448	-0.151847	0.122134	0.20238	0.18657	0.0819322	-0.510075	-0.255616	-0.356867	0.0341578	-0.0135914	-0.0714746	-0.177838	0.0956664	-0.00545673	-0.125696	0.540358	0.137986					-0.00751336	0.213465	0.0455108
40.9092	-0.0993769	0.0948034	-0.0372782	-0.0683546	0.187533	-0.153206	0.133696	0.19558	0.187989	0.0862255	-0.511668	-0.255642	-0.343538	0.0290724	-0.0117483	-0.072623	-0.183852	0.103091	-0.00729947	-0.130491	0.545556	0.140104					-0.00779212	0.214406	0.0457114
41.0075	-0.107148	0.0909524	-0.0364864	-0.0895856	0.1888	-0.153507	0.148156	0.19083	0.188677	0.0899222	-0.510908	-0.256934	-0.330094	0.0206487	-0.00696841	-0.0751246	-0.190046	0.111844	-0.0159919	-0.1366	0.554455	0.143561					-0.00825211	0.216014	0.0460544
41.1058	-0.113834	0.0879125	-0.0362577	-0.108225	0.190388	-0.155976	0.161105	0.190648	0.188049	0.0923237	-0.506214	-0.254603	-0.318002	0.0123299	-0.00468346	-0.0775657	-0.197195	0.12046	-0.0272231	-0.142823	0.569808	0.147711					-0.00826674	0.218299	0.0465416
41.2041	-0.119979	0.0836942	-0.0368297	-0.124851	0.192173	-0.158118	0.17181	0.190084	0.184477	0.0997578	-0.498116	-0.249411	-0.303749	0.00158369	-0.00425613	-0.077184	-0.205747	0.126698	-0.0378669	-0.150159	0.592632	0.154552					-0.0076729	0.221015	0.0471205
41.3024	-0.124065	0.0792717	-0.0366554	-0.138732	0.190196	-0.157747	0.181397	0.186451	0.185124	0.105493	-0.485268	-0.244918	-0.292062	-0.0106265	-0.00661546	-0.0781338	-0.212331	0.129353	-0.051674	-0.154872	0.613171	0.162527					-0.00730536	0.222906	0.0475237
41.4007	-0.129044	0.0754693	-0.0350975	-0.147222	0.187341	-0.156889	0.189909	0.180557	0.18682	0.107138	-0.471214	-0.241093	-0.281131	-0.0225631	-0.00297251	-0.0801771	-0.216004	0.130821	-0.0644338	-0.158523	0.632516	0.171042					-0.0065795	0.224377	0.0478374
41.499	-0.138348	0.0722597	-0.0294573	-0.153486	0.185598	-0.153384	0.195516	0.176394	0.185111	0.107186	-0.457156	-0.238807	-0.268783	-0.032218	-0.00075954	-0.0767481	-0.218475	0.131834	-0.0799313	-0.160749	0.649673	0.179974					-0.00567077	0.225444	0.0480648
41.5973	-0.147507	0.0719451	-0.023076	-0.160725	0.18454	-0.146341	0.201149	0.173667	0.182769	0.102551	-0.444611	-0.235521	-0.257189	-0.0404865	-0.000245259	-0.0711181	-0.219504	0.135591	-0.0928894	-0.162128	0.667253	0.185544					-0.00437867	0.226637	0.0483192
41.6956	-0.154101	0.0751083	-0.0157653	-0.165967	0.18246	-0.137906	0.205916	0.17169	0.181907	0.0975471	-0.42833	-0.234377	-0.250076	-0.050726	-5.14392e-05	-0.06483	-0.221221	0.14085	-0.103911	-0.166593	0.690251	0.185256					-0.00285773	0.228593	0.0487361
41.7939	-0.160268	0.07797	-0.00904444	-0.165045	0.180929	-0.128526	0.207931	0.167351	0.180092	0.0942962	-0.407318	-0.231706	-0.244687	-0.0572522	0.00435896	-0.0579441	-0.219856	0.148328	-0.11628	-0.171445	0.715221	0.175311					-0.00079926	0.229876	0.0490097
41.8922	-0.16851	0.0816901	0.000857316	-0.160632	0.177459	-0.11915	0.207265	0.158625	0.176786	0.0929201	-0.382922	-0.232923	-0.239465	-0.0617256	0.0123067	-0.0506426	-0.21589	0.157535	-0.128985	-0.175613	0.745745	0.164372					0.00177737	0.231724	0.0494037
41.9906	-0.175179	0.0882305	0.00886465	-0.155454	0.171892	-0.110066	0.203901	0.149828	0.171613	0.0886974	-0.356562	-0.23287	-0.237578	-0.0690383	0.0241649	-0.0451392	-0.20877	0.165586	-0.14321	-0.18121	0.77314	0.156028					0.00394856	0.233259	0.049731
42.0889	-0.181245	0.0968729	0.014269	-0.149714	0.171558	-0.0982342	0.198199	0.139659	0.167298	0.0835943	-0.331945	-0.235369	-0.238648	-0.0759955	0.0412106	-0.0379733	-0.200786	0.174628	-0.160309	-0.183876	0.799291	0.152759					0.00660208	0.235557	0.0502209
42.1872	-0.190101	0.104959	0.019089	-0.145636	0.173092	-0.0818897	0.192495	0.128132	0.165901	0.0759524	-0.306476	-0.236238	-0.23982	-0.0847853	0.0557522	-0.0328025	-0.192326	0.187212	-0.176876	-0.183462	0.823122	0.151551					0.00940215	0.238014	0.0507448
42.2855	-0.196955	0.115226	0.0279503	-0.141847	0.173648	-0.0649651	0.185137	0.117837	0.168132	0.0683856	-0.280151	-0.238399	-0.244497	-0.0933234	0.0712361	-0.026635	-0.183044	0.198095	-0.188466	-0.180764	0.843263	0.151373					0.0127835	0.240208	0.0512124
42.3838	-0.19903	0.124708	0.0378077	-0.133474	0.172559	-0.0497156	0.178294	0.107872	0.169408	0.0623174	-0.256567	-0.243158	-0.252737	-0.103336	0.0876217	-0.0214097	-0.172561	0.207933	-0.198928	-0.179511	0.856005	0.145774					0.0154487	0.241573	0.0515035
42.4821	-0.200112	0.132299	0.0434447	-0.121198	0.17097	-0.037207	0.170115	0.101717	0.168045	0.0570353	-0.232442	-0.246379	-0.262389	-0.113032	0.101947	-0.0156891	-0.16027	0.216381	-0.204246	-0.174517	0.86129	0.133718					0.0177037	0.241209	0.0514259
42.5804	-0.201322	0.139356	0.0504063	-0.107171	0.168829	-0.0268415	0.161527	0.0988613	0.167669	0.0496128	-0.207053	-0.250347	-0.274676	-0.121629	0.115988	-0.00921569	-0.146599	0.221239	-0.209643	-0.167629	0.859806	0.130377					0.0200702	0.240157	0.0512016
42.6787	-0.202239	0.149078	0.0567279	-0.0949973	0.167711	-0.0152252	0.156175	0.0999606	0.167872	0.040538	-0.183082	-0.252812	-0.288059	-0.127363	0.12813	-0.00364473	-0.133758	0.223197	-0.212739	-0.160622	0.859957	0.124054					0.0226754	0.239637	0.0510907
42.777	-0.199671	0.163917	0.0637174	-0.08231	0.167364	-0.00276079	0.15211	0.101363	0.162111	0.0351612	-0.161602	-0.25702	-0.301107	-0.132893	0.136093	-0.000194967	-0.123419	0.226981	-0.215463	-0.15327	0.858754	0.114819					0.0251218	0.239219	0.0510017
42.8753	-0.194786	0.180496	0.0701485	-0.0704128	0.167109	0.0101401	0.149336	0.103527	0.151797	0.0320897	-0.142688	-0.26242	-0.314217	-0.136089	0.142835	0.00253424	-0.113718	0.232555	-0.217662	-0.14439	0.856953	0.110647					0.0278994	0.239044	0.0509645
42.9736	-0.187348	0.194458	0.077514	-0.0602343	0.164425	0.023843	0.14441	0.106396	0.141155	0.028179	-0.126563	-0.26935	-0.324986	-0.138654	0.144903	0.00415732	-0.104815	0.23786	-0.220746	-0.138086	0.860194	0.105011					0.0300783	0.239686	0.0511012
43.0719	-0.177335	0.206665	0.0862483	-0.0497685	0.16295	0.0356989	0.139659	0.107676	0.130305	0.0245104	-0.111813	-0.279258	-0.335139	-0.137984	0.143419	0.00618288	-0.0973224	0.242155	-0.220186	-0.128648	0.85526	0.093623					0.0316772	0.238778	0.0509077
43.1702	-0.168101	0.217603	0.0959894	-0.0399097	0.163371	0.0488988	0.136442	0.107419	0.123477	0.0219927	-0.100566	-0.293145	-0.344847	-0.135422	0.145167	0.0102182	-0.0888683	0.244233	-0.216875	-0.117388	0.844613	0.0771858					0.0332494	0.237337	0.0506004
43.2685	-0.158974	0.22508	0.10784	-0.029933	0.164168	0.06173	0.133462	0.105837	0.118992	0.0189131	-0.0937017	-0.30963	-0.355504	-0.129348	0.148687	0.0121147	-0.0771984	0.248504	-0.212854	-0.105871	0.832124	0.0607667					0.034782	0.236115	0.0503399
43.3668	-0.151428	0.231572	0.114859	-0.017896	0.167785	0.0722923	0.13347	0.108162	0.113723	0.0195393	-0.0936296	-0.325385	-0.365394	-0.119322	0.156885	0.0144707	-0.0654444	0.255196	-0.207246	-0.0972465	0.821579	0.047412					0.036998	0.235722	0.0502562
43.4651	-0.143108	0.240071	0.122353	-0.00578816	0.172309	0.0775602	0.134556	0.110986	0.106969	0.0258652	-0.0966495	-0.339111	-0.371631	-0.106894	0.159952	0.0181591	-0.0528523	0.260675	-0.203131	-0.0911203	0.808988	0.0337445					0.0391773	0.234839	0.0500679
43.5634	-0.130918	0.248257	0.126668	0.00607887	0.173884	0.0804715	0.135514	0.110291	0.100951	0.0349387	-0.104697	-0.353348	-0.379963	-0.0931152	0.163498	0.0172853	-0.0380797	0.267855	-0.198267	-0.0866792	0.795273	0.0172649					0.0405984	0.234124	0.0499154
43.6617	-0.117971	0.253162	0.129998	0.0187146	0.171616	0.0828132	0.136698	0.108454	0.0944693	0.0450377	-0.114288	-0.369484	-0.387671	-0.0803086	0.167035	0.0155664	-0.0248964	0.27101	-0.195908	-0.0823945	0.777662	0.00218275					0.0409772	0.233013	0.0496785
43.76	-0.107473	0.25861	0.132833	0.0306394	0.169707	0.0822476	0.136006	0.105265	0.0852101	0.056771	-0.128029	-0.384087	-0.393188	-0.0650976	0.17115	0.0125613	-0.0125704	0.272893	-0.193336	-0.0790359	0.754899	-0.00631216					0.0408938	0.231224	0.049297
43.8583	-0.0970315	0.26274	0.134324	0.0371883	0.168297	0.0791084	0.135876	0.102017	0.0763851	0.0701646	-0.143789	-0.401803	-0.400747	-0.0555713	0.174326	0.00437246	-0.00224437	0.273102	-0.188395	-0.0766839	0.730687	-0.00890166					0.039701	0.229977	0.0490313
43.9566	-0.0865972	0.265476	0.133743	0.0435502	0.169227	0.0754535	0.138103	0.102257	0.0704751	0.0829137	-0.163147	-0.418539	-0.407958	-0.0485424	0.17401	-0.00625494	0.00696688	0.271339	-0.18137	-0.0778587	0.702837	-0.00790136					0.0380992	0.228542	0.0487254
44.0549	-0.0767472	0.265819	0.131543	0.0463741	0.170441	0.0705754	0.143442	0.104062	0.0654348	0.096122	-0.18363	-0.437526	-0.4147	-0.0396288	0.169714	-0.0163128	0.0124371	0.26937	-0.171989	-0.0779745	0.673282	-0.00749141					0.036028	0.227227	0.048445
44.1532	-0.068135	0.26173	0.130561	0.0480795	0.169209	0.0649921	0.152243	0.107694	0.0615966	0.110333	-0.203989	-0.453624	-0.418229	-0.0307539	0.16201	-0.0269943	0.0158823	0.266874	-0.16154	-0.0804743	0.643938	-0.0122192					0.0335992	0.225665	0.0481119
44.2515	-0.0569501	0.256198	0.130502	0.0498815	0.168444	0.0558191	0.158538	0.111922	0.0580098	0.124367	-0.221463	-0.471649	-0.419348	-0.019561	0.157841	-0.035333	0.0190229	0.262696	-0.152816	-0.0845881	0.612165	-0.0155479					0.0312796	0.223975	0.0477515
44.3498	-0.0466327	0.24787	0.129034	0.0542086	0.168269	0.0428855	0.164142	0.117512	0.0523079	0.138701	-0.240008	-0.489037	-0.421575	-0.00801927	0.153211	-0.0439325	0.0215425	0.261167	-0.146296	-0.0879543	0.583481	-0.0200714					0.028673	0.223262	0.0475997
44.4482	-0.0410044	0.239705	0.126906	0.0567818	0.168206	0.0318721	0.168546	0.123589	0.0480977	0.155177	-0.258049	-0.505115	-0.424102	0.00840819	0.149975	-0.0498553	0.0251981	0.258728	-0.142873	-0.0911087	0.567649	-0.0254913					0.0268746	0.224395	0.0478412
44.5465	-0.0361823	0.23339	0.126798	0.0583597	0.167749	0.0209868	0.172542	0.127045	0.0468829	0.171873	-0.27609	-0.524157	-0.427386	0.0267366	0.148544	-0.0560071	0.0288026	0.253714	-0.142623	-0.0973055	0.559489	-0.0296897					0.0251578	0.227239	0.0484476
44.6448	-0.0295791	0.228746	0.122882	0.0596515	0.168171	0.0108311	0.176816	0.127656	0.0456912	0.186696	-0.296819	-0.544017	-0.428631	0.0424095	0.144935	-0.0637602	0.0308707	0.2513	-0.14397	-0.104125	0.558304	-0.0458541					0.0226457	0.231361	0.0493262
44.7431	-0.0245659	0.220832	0.116289	0.062303	0.166667	0.000736424	0.175064	0.125954	0.0460701	0.201241	-0.317885	-0.563603	-0.431735	0.0556508	0.139211	-0.0707071	0.0320359	0.250828	-0.141665	-0.109166	0.558653	-0.0586347					0.0197079	0.235408	0.0501891
44.8414	-0.021216	0.207574	0.109763	0.066769	0.163149	-0.0132543	0.17046	0.122532	0.0500344	0.213434	-0.339496	-0.578603	-0.436356	0.0696588	0.135249	-0.0768541	0.0350186	0.249255	-0.141551	-0.113365	0.559237	-0.0686661					0.0164897	0.238954	0.0509453
44.9397	-0.020051	0.194207	0.10441	0.0714604	0.162423	-0.0306711	0.164473	0.116568	0.0578743	0.221903	-0.360047	-0.593367	-0.440956	0.0827134	0.12971	-0.0834028	0.039	0.245141	-0.144742	-0.117871	0.555153	-0.0842862					0.0122564	0.242141	0.0516247
45.038	-0.0204071	0.182214	0.100322	0.0755692	0.165722	-0.0471818	0.156491	0.107438	0.0676302	0.228113	-0.378719	-0.606324	-0.446417	0.0945822	0.12569	-0.0850653	0.0421369	0.242504	-0.148157	-0.123007	0.552504	-0.0941308					0.00870488	0.245336	0.0523057
45.1363	-0.0219419	0.172145	0.0959959	0.0798183	0.168355	-0.0616465	0.145605	0.10131	0.0773749	0.231901	-0.398231	-0.613848	-0.451323	0.10575	0.123551	-0.0851205	0.0457482	0.238291	-0.151852	-0.1312	0.555189	-0.0978599					0.00581864	0.248456	0.0529711
45.2346	-0.0231041	0.165641	0.0921902	0.0859214	0.168622	-0.0756708	0.130914	0.096167	0.0856528	0.232382	-0.414768	-0.61681	-0.455263	0.115357	0.119089	-0.0867085	0.0485791	0.235092	-0.154675	-0.139455	0.561232	-0.0967354					0.00334773	0.250961	0.053505
45.3329	-0.0228885	0.163462	0.0876444	0.0905759	0.165997	-0.0872561	0.116508	0.0922658	0.0931632	0.229732	-0.427334	-0.617173	-0.457876	0.122851	0.113101	-0.0853125	0.0458362	0.230753	-0.157989	-0.144333	0.561127	-0.0973893					0.000702927	0.25187	0.0536989
45.4312	-0.0205704	0.161706	0.0879624	0.0940289	0.160804	-0.097557	0.098741	0.0883326	0.0994961	0.224647	-0.434786	-0.614563	-0.460344	0.126714	0.101924	-0.0833736	0.0407313	0.225462	-0.161827	-0.145129	0.557507	-0.101777					-0.00235772	0.251295	0.0535762
45.5295	-0.0179215	0.159199	0.0868077	0.0942784	0.1547	-0.103163	0.078618	0.0852493	0.106162	0.218785	-0.438978	-0.613854	-0.466106	0.125944	0.0926634	-0.0814906	0.03321	0.221532	-0.164314	-0.143464	0.550378	-0.104458					-0.0057374	0.25027	0.0533578
45.6278	-0.0169353	0.156352	0.0867801	0.0942818	0.150049	-0.10708	0.0572583	0.0867029	0.113995	0.211743	-0.43479	-0.610655	-0.470796	0.122039	0.084054	-0.0763967	0.022994	0.214827	-0.162752	-0.139899	0.546473	-0.102462					-0.00791899	0.248233	0.0529235
45.7261	-0.0168852	0.155156	0.0888107	0.094805	0.149213	-0.110688	0.0332523	0.088787	0.120922	0.206362	-0.426576	-0.605488	-0.475725	0.118776	0.0770703	-0.0717496	0.0124607	0.209963	-0.158326	-0.137408	0.546046	-0.0985757					-0.00908163	0.246456	0.0525447
45.8244	-0.0137686	0.149491	0.0923574	0.0939356	0.146465	-0.111591	0.0107097	0.0920771	0.13144	0.198024	-0.415926	-0.597997	-0.481302	0.112784	0.0675452	-0.0660077	0.00318274	0.203617	-0.153054	-0.130997	0.544469	-0.10043					-0.0102262	0.243931	0.0520063
45.9227	-0.00958432	0.144698	0.0978672	0.0952448	0.143716	-0.109932	-0.0129246	0.0967934	0.141241	0.187165	-0.403874	-0.588313	-0.483274	0.109666	0.0575052	-0.0543409	-0.00745958	0.19617	-0.145714	-0.12324	0.544597	-0.10238					-0.0102896	0.240992	0.0513797
46.021	-0.00434631	0.139558	0.102103	0.0974235	0.13784	-0.104574	-0.0352197	0.102525	0.149458	0.17501	-0.389592	-0.576952	-0.485419	0.108605	0.0487634	-0.0403296	-0.0203793	0.189567	-0.140698	-0.111517	0.552256	-0.103793					-0.00953225	0.238603	0.0508704
46.1193	-0.000194016	0.133558	0.107566	0.103377	0.13206	-0.0975134	-0.0586602	0.106455	0.156094	0.163267	-0.374927	-0.561531	-0.488177	0.10844	0.0443829	-0.0259758	-0.0315497	0.18273	-0.136735	-0.100054	0.565333	-0.102556					-0.00793689	0.236765	0.0504785
46.2176	0.00347221	0.129815	0.113433	0.109202	0.124119	-0.0902422	-0.0833164	0.109382	0.161824	0.149917	-0.36127	-0.546867	-0.492126	0.10778	0.0407208	-0.011479	-0.0403808	0.176579	-0.132326	-0.0861038	0.575268	-0.0974709					-0.00636673	0.235027	0.0501078
46.3159	0.0036984	0.12618	0.118371	0.113429	0.112301	-0.0819092	-0.106425	0.11549	0.16594	0.139033	-0.350223	-0.530295	-0.499166	0.105555	0.0355944	0.000547443	-0.0501582	0.173246	-0.12448	-0.073245	0.590093	-0.0988596					-0.0052401	0.234509	0.0499975
[truncated: 143 more rows]
