# Supplementary material for: Cholecystokinin modulates age-dependent thalamocortical neuroplasticity
Source: eLife journal article supplement (doi:10.7554/elife.101513), 2024-10-14
Supplement: data1 [file Figure 3B.xlsx]

## Sheet: cell count
P14		P20		8W		18M		CCK-KO
						Slice	Count	Slice	Count
P14_M1_L	33	P20_M1_L	281	P54_M1_L	315	18M_M1_L	88	CCK-KO_M1_L	0
P14_M1_R	180	P20_M1_R	349	P54_M1_R	255	18M_M1_R	136	CCK-KO_M1_R	0
P14_M2_L	3	P20_M2_L	184	P54_M2_L	195	18M_M2_L	73	CCK-KO_M2_L	0
P14_M2_R	12	P20_M2_R	290	P54_M2_R	164	18M_M2_R	103	CCK-KO_M2_R	0
								CCK-KO_M3_L	0
								CCK-KO_M3_R	0
								CCK-KO_M4_L	0
								CCK-KO_M4_R	0

## Sheet: normalized expression level
P14	P20	P54	18M
1.07855	0.814336	1.07196	0.923341
0.998612	1.06372	0.963838	0.983512
0.968713	1.08553	1.04365	0.861028
1.03622	1.06473	0.987864	0.917277
1.03246	0.959175	0.998813	0.964044
1.13692	1.09347	1.00811	0.927809
1.09977	1.07468	0.933944	1.02089
1.05482	1.06378	0.874752	1.04623
1.06802	0.995796	1.03067	0.908562
0.922749	0.854557	1.05191	0.902995
0.883046	1.07309	0.99313	0.880676
0.990013	1.06617	0.927794	0.949732
0.898909	1.00467	1.10923	0.847644
0.850822	1.07233	1.00505	0.997623
1.02289	1.02711	1.04854	1.06493
1.03976	1.06473	1.10495	0.929451
0.978838	1.08684	1.00277	0.984526
1.0294	1.0769	1.05743	0.939822
0.987678	1.00656	1.00659	0.997929
1.01599	0.976383	1.08518	0.99689
0.919973	1.11393	0.991172	0.932543
1.04723	1.05634	0.959486	0.983938
1.01182	1.08309	0.974927	1.0061
1.01377	0.985449	0.978582	0.911178
1.0464	0.842042	1.10336	0.997191
0.909682	1.03652	1.0274	0.919742
0.976684	1.07761	1.10055	1.0058
0.988341	1.05834	1.08355	0.937714
1.05835	0.896625	1.08285	0.946665
0.977573	1.03102	0.917749	0.830887
1.12989	1.08786	1.06413	0.951725
0.985901	0.959862	1.04138	0.954089
1.07196	1.05884	1.10953	0.933979
0.98939	1.05213	1.00632	0.92053
1.00184	1.08276	1.04044	1.02416
0.998727	1.0225	0.934506	0.927056
1.09668	1.00476	1.01663	0.968436
1.04661	1.03899	1.01448	0.982257
0.998075	1.13672	1.00958	0.975063
1.04562	1.04378	1.05889	0.959506
1.00191	0.95808	1.04158	1.01713
0.988833	1.03887	0.966915	0.958527
1.08761	1.02788	1.02744	1.0047
1.0325	1.1234	0.972909	0.972468
1.07206	1.01423	1.00931	1.04063
0.941454	1.04887	0.873879	0.952925
1.03671	1.00835	1.06613	0.997608
0.99824	0.925495	1.09595	0.917523
1.12394	1.05535	1.05351	0.819075
1.05973	0.988999	1.12469	0.967151
1.10797	0.998783	1.00302	0.89414
1.03952	1.11448	1.00904	0.981965
1.06019	1.06722	0.930249	1.00977
1.03467	1.1156	0.921504	1.01421
1.0393	0.9355	0.990655	0.870315
1.0494	1.05792	1.08109	0.990239
1.1292	1.13202	1.05529	0.958291
0.989641	1.09682	0.983647	0.950435
1.09521	1.09949	0.845747	0.944205
0.998938	1.07919	0.956112	0.962352
1.09314	1.14487	1.07997	1.0555
1.03884	0.953005	1.01599	0.97069
1.03794	1.11001	1.10145	1.06066
1.10127	1.09234	1.03538	0.978642
0.98303	1.12094	1.08768	0.900827
1.11626	1.15352	1.09892	0.972217
1.1119	1.07033	1.00774	0.941248
0.953903	1.13111	0.968858	1.02882
1.06862	1.10209	1.03553	1.00948
1.06727	0.965354	1.09981	0.954421
1.04614	1.05642	1.05632	1.04479
1.05897	1.08507	1.08398	1.07963
1.17612	1.14165	0.955831	0.875792
1.05322	0.847569	1.05003	0.894682
1.13676	0.859918	1.13674	0.918989
1.05615	0.957488	1.03766	0.980269
1.0729	1.10484	1.04551	0.902001
1.09072	1.10065	1.04078	0.982759
1.09845	1.10373	1.02853	0.908507
0.974737	0.822042	1.02397	0.954275
1.01336	1.0413	1.10505	0.997538
1.02659	1.03222	1.05741	0.982166
1.04907	1.11382	0.922192	0.914295
1.11237	1.09701	1.02879	1.0161
1.10842	1.09137	0.913015	0.937001
0.974671	1.07879	1.10434	0.940741
1.08934	1.09649	1.10798	0.929687
1.17685	1.01692	1.08713	0.927593
1.06976	0.968472	1.00424	0.949561
1.02892	1.0677	1.01495	0.892102
1.10658	1.07439	1.0465	0.938743
1.11913	1.08311	1.04575	0.947096
1.09362	0.935676	1.0133	0.989621
1.0852	0.91056	1.05506	1.02668
1.05606	0.971238	1.07087	1.01746
1.13483	1.08473	0.870992	0.897483
1.09271	1.08114	1.12219	0.940374
1.10746	1.03687	1.03021	1.05746
1.12787	1.06707	1.02458	0.90552
1.03555	1.05734	0.956735	0.841299
0.949506	0.835712	1.10408	0.95689
1.02939	0.971845	1.03445	1.00862
1.07701	1.10282	0.972518	0.904356
1.05938	1.07708	1.05249	0.952608
1.0075	1.05784	1.07779	0.952392
0.988356	1.08934	0.905028	1.04433
1.04029	0.905967	0.964079	0.890094
1.06608	0.912824	1.00259	0.884416
1.11061	1.03662	0.886876	0.928818
1.04583	1.11558	1.05574	0.945374
1.14284	1.01991	1.09145	0.903783
1.04835	1.05503	1.01668	0.959596
1.15937	1.02175	0.957518	0.922844
1.07948	1.11612	1.06661	0.936614
1.09257	1.15088	1.03115	0.981408
0.820436	0.989571	1.08285	0.928055
1.10692	0.958442	1.08979	0.926323
1.112	1.03885	1.05821	1.03632
1.11183	1.10761	0.898874	0.901268
1.11694	1.06585	1.00839	0.943386
1.02726	1.03242	1.01536	0.911283
1.02756	1.09743	0.994255	0.941865
1.1263	1.02249	1.06272	0.992026
1.10417	0.971599	1.02229	0.952498
1.01778	1.14993	1.12628	0.96818
1.09673	0.903954	0.933131	0.981976
1.0022	1.06562	1.07835	0.99693
1.041	1.03616	1.09073	0.81901
1.0714	0.908045	1.00829	0.946499
1.16205	1.06085	1.04787	0.922342
0.962086	1.14089	1.06542	0.806384
1.04457	1.01977	1.13346	0.998637
0.726204	1.03655	1.09656	0.94794
1.09088	1.14472	1.089	0.999857
1.09068	1.09715	0.987437	0.963472
1.03227	1.11176	0.966182	0.960199
1.07596	0.952021	0.976167	0.99441
1.05339	1.0291	0.999787	0.993948
0.937789	1.01766	1.03013	1.04752
0.99938	1.07828	1.06996	0.978376
0.816374	1.04411	0.866369	0.95183
1.1123	1.10759	1.02792	0.991072
1.07746	0.977498	1.05093	0.993828
0.971609	1.04498	1.03353	1.04389
1.01914	1.08392	1.00467	0.9755
1.09621	1.07628	1.02238	1.00987
1.10025	1.03218	0.891705	0.954948
0.992357	1.01807	1.05339	0.840415
1.07942	1.01611	1.11642	0.879813
0.954496	1.09284	1.13801	1.01051
1.03481	1.05273	0.998155	0.932849
1.14646	1.05579	0.977593	0.993225
0.983928	0.932182	0.996965	0.95045
1.07666	1.05951	0.955219	1.00976
0.987749	0.967066	1.01195	0.991248
1.04699	1.06504	1.02634	1.0887
1.0266	1.02365	1.04052	1.05877
1.0424	1.07047	0.955856	1.01567
1.13406	1.09439	1.01084	0.959887
1.07374	1.10019	0.929381	0.871178
0.965118	1.06677	0.981825	0.977106
1.0273	1.06384	1.04065	1.06423
1.1376	1.08637	0.96173	0.901966
1.07593	1.10688	1.04572	0.891409
1.05137	1.01935	0.976669	0.982292
1.16186	1.04949	1.0301	0.89408
1.10171	1.06114	0.966017	1.02724
1.11418	1.02945	0.951971	0.947418
1.19253	1.12259	1.01245	0.978999
1.01307	1.05758	1.09088	1.0039
1.17333	1.04056	1.04031	0.999365
1.15226	1.13495	1.1048	0.933271
1.17608	1.09819	1.06688	1.06187
1.12263	0.971373	1.11503	0.923954
1.03711	1.08722	1.11697	0.856695
1.0844	1.13012	1.01151	0.947162
1.03185	1.00781	0.983251	0.972096
1.14348	1.07087	0.914958	0.999992
0.97941	1.04114	0.812885	0.999656
1.08759	0.824457	0.975183	1.0527
1.13465	1.12454	1.06642	1.02588
1.04239	1.10255	1.08253	0.948361
1.02149	1.10409	1.02592	0.963095
0.994234	1.13737	1.06512	0.948627
1.05264	1.06746	0.883673	0.96807
1.06934	1.07957	1.04767	0.962267
1.08758	1.03651	1.09626	0.959069
1.08136	1.15943	1.09893	0.990705
1.13415	1.10252	0.991398	0.968597
1.14743	1.0686	1.11734	1.02128
1.03145	0.937388	1.01264	0.858919
1.10022	1.10696	1.0155	1.06435
1.10847	1.09638	1.06888	0.99938
1.05069	1.12606	0.977232	0.948321
0.977176	1.08598	1.00274	0.930922
1.04988	1.02057	1.02016	1.07027
1.11732	1.07443	0.97805	0.97309
0.993798	1.09878	0.979581	1.00779
1.13916	1.11033	0.995354	0.957849
1.07509	1.02765	1.09657	1.06798
1.01715	1.13862	0.955244	0.959988
1.04122	1.04938	1.07997	0.958236
1.04558	1.12358	0.943336	0.923703
1.06204	1.06287	0.90662	0.908377
0.989531	1.08775	1.05227	0.926067
1.10646	1.05206	1.09129	0.969857
1.04094	1.07549	1.10198	0.898573
1.04159	1.10066	1.08077	0.970947
0.992257	1.08408	1.01604	0.985168
1.08635	1.10967	1.05546	0.996227
1.11889	1.04545	1.01318	1.04198
1.01185	1.04796	1.05118	0.9644
1.03359	1.11766	1.03213	1.08896
1.06361	1.08035	0.934787	1.0152
0.938602	1.06646	1.13203	1.03842
1.04073	0.996559	1.05105	1.05801
0.996308	0.97562	1.10761	1.0572
1.03237	1.05788	1.05322	0.993557
1.11283	1.04358	0.876128	1.0203
0.961152	1.15317	1.03214	0.991544
1.06221	1.05907	0.957448	0.951142
1.13909	1.09711	1.04472	1.01745
0.93686	1.00095	1.10888	0.982518
0.924948	1.09543	1.00059	1.03135
1.05038	1.12616	1.10405	0.940625
1.08958	1.00788	0.980505	1.00303
0.981955	1.13498	1.07704	0.897624
1.00211	0.925324	1.01225	0.97689
	1.13195	1.13632	0.826841
	0.980896	0.983712	1.02371
	1.03985	1.02981	0.849692
	1.22203	1.08841	0.940098
	1.12045	1.0522	0.922347
	1.12053	1.09117	1.05236
	0.860892	0.98928	0.952081
	1.14051	1.08241	0.840707
	1.13071	1.0742	0.849562
	1.0346	1.09304	0.916037
	1.12531	1.07966	0.943944
	1.07108	1.06345	0.864948
	1.12507	1.08573	0.937553
	1.10177	1.06376	0.98054
	0.997136	1.02731	0.892378
	1.11208	1.0318	0.914727
	1.04569	0.943557	0.935696
	1.06129	0.868553	0.9431
	1.09028	1.01995	0.872534
	1.08432	1.02472	1.00203
	0.989952	1.02832	0.951288
	1.10768	1.09815	1.00678
	1.03932	1.13757	1.0353
	1.05686	0.932744	0.915902
	1.08256	1.05466	0.9179
	1.15414	0.935887	0.940169
	1.09753	1.07551	0.910425
	0.951102	1.09383	0.90783
	1.10486	1.00001	1.06952
	1.04195	1.0741	0.894767
	1.16721	1.02078	0.916007
	1.0738	0.902604	1.10805
	1.17086	1.09522	0.972934
	1.06775	1.0483	0.931243
	1.10257	1.08143	0.995921
	1.02967	0.960404	0.882604
	1.10259	0.977232	0.890124
	1.10916	1.0929	0.932458
	1.03513	1.0944	0.919943
	1.08007	1.15486	0.895822
	0.921419	1.01249	0.893879
	1.12606	1.05885	0.883302
	1.0488	1.12433	0.923763
	0.975133	1.08487	0.949019
	1.06767	1.08799	0.96805
	1.12952	1.09741	0.959104
	0.994074	1.00308	0.930836
	1.02813	1.01943	0.958863
	1.08273	0.920811	0.97049
	1.10022	1.02947	1.02093
	1.15112	1.08663	0.92662
	1.14554	0.984812	0.943753
	1.01241	1.01166	0.981649
	1.13958	1.07945	0.886354
	0.98182	1.05602	0.87413
	1.06198	1.00985	0.961589
	1.10052	1.04714	1.04534
	1.05588	1.12712	1.04543
	1.1166	1.02885	0.718268
	1.05483	0.975299	0.987985
	1.0443	1.0865	0.98806
	1.07374	1.05464	0.952894
	1.10949	1.0898	0.9268
	1.11632	1.02712	0.899607
	1.06642	1.07056	0.826013
	1.0231	0.971559	0.923462
	1.03921	1.01213	0.989039
	1.11484	0.972001	1.04707
	0.99432	1.08561	0.919662
	0.966745	1.04991	0.986835
	1.04063	1.02877	0.805737
	1.13622	1.08766	0.881113
	1.0253	1.01058	0.800772
	1.08798	1.07074	0.860109
	1.07002	1.08927	0.843844
	1.03029	1.02663	0.936399
	1.01703	1.032	0.88928
	1.0562	1.01878	0.928818
	1.1013	1.08052	0.918989
	0.986915	1.00868	0.870254
	0.969124	1.04664	0.956936
	1.07078	1.00953	0.829015
	0.926921	1.02573	0.974129
	1.03501	1.05415	0.959912
	1.04615	1.01423	0.960113
	1.07785	1.02088	0.920219
	0.910395	1.03451	0.937172
	1.05496	0.893392	0.915691
	1.0701	0.985951	0.94049
	1.07026	0.92803	0.865415
	1.06076	0.932864	0.945425
	1.03555	0.985193	0.96691
	0.961905	0.924852	0.878282
	1.02418	0.97048	0.954852
	1.01097	0.874823	0.839005
	1.02511	0.910269	0.875576
	0.967382	1.00891	0.949651
	1.11346	1.01485	1.01278
	1.04112	0.984827	1.0267
	1.03918	0.949099	0.918316
	0.97436	0.917764	0.918141
	1.08504	1.04164	0.913075
	0.999656	1.02878	0.897393
	1.03124	1.06954	0.924707
	1.08762	1.03134	0.832619
	1.09243	1.08539	0.835536
	1.0721	0.937834	0.978938
	0.952553	0.918266	0.863799
	1.04095	1.11884	0.95044
	1.08208	0.982964	0.896283
	1.05796	1.03791	0.931348
	1.05544	0.971223	0.966499
	1.09748	0.952779	0.93041
	1.061	0.977106	0.964722
	1.05566	0.936178	0.939406
	0.986549	1.05959	0.887744
	1.03894	0.864913	0.876464
	0.996288	1.03621	0.851821
	1.04075	0.969882	0.910119
	1.07381	1.045	0.998517
	1.06476	0.987794	0.94814
	1.11655	0.95668	0.8805
	1.08665	1.03553	0.916303
	1.08204	1.03248	0.951238
	1.05213	0.972161	0.919787
	1.03223	1.0112	0.947533
	1.09802	0.965911	0.96315
	1.04937	0.964902	0.920821
	1.09175	1.05784	0.994802
	1.06162	1.04508	0.971157
	1.03255	1.02565	0.895109
	1.07215	0.974942	0.921785
	1.08271	0.920349	0.913557
	1.08136	0.94934	0.798227
	1.08646	1.00121	0.985966
	1.027	1.04214	0.94794
	1.03852	0.894843	0.898588
	1.08129	1.10592	0.856841
	1.07468	0.983482	0.912609
	1.0889	0.987829	0.946956
	1.15825	0.944667	0.997317
	1.02223	1.02975	0.867227
	1.04038	1.0052	0.97062
	0.942302	0.916344	0.85281
	1.00912	0.998843	0.901464
	1.05911	0.95669	0.95553
	1.04268	0.99061	0.902855
	1.14397	1.01943	0.947222
	1.08175	0.981735	0.935294
	1.03623	0.958828	0.888969
	1.07171	1.03224	1.01382
	1.0932	0.930184	0.895054
	0.938492	0.877639	0.918392
	1.12316	0.859015	1.0156
	1.06881	1.06581	0.919978
	1.10273	0.978758	0.823146
	1.10924	1.0793	0.969009
	1.05855	0.930194	0.956529
	1.15318	0.800908	0.884306
	1.06008	0.974315	0.961961
	1.02421	1.04835	0.943301
	1.03331	0.96676	0.999149
	1.07887	1.05066	0.858794
	0.926379	1.04467	0.966825
	1.06125	0.933422	0.849125
	1.08836	0.993411	0.92297
	0.956378	1.0117	0.83667
	1.12386	0.983717	0.895023
	0.992849	0.864527	0.92421
	1.06496	1.10593	0.907659
	1.13253	0.967754	0.917995
	1.08884	0.964581	0.97551
	1.03304	0.992332
	1.07643	0.956564
	0.998537	1.002
	1.12344	1.02261
	1.0361	1.01951
	1.13068	1.04066
	1.08921	1.01561
	1.13513	0.980078
	1.10428	1.07039
	1.06041	1.02706
	1.08949	1.04815
	1.03605	0.964521
	1.09398	1.03127
	1.07274	1.05506
	1.11619	0.966353
	1.07733	0.960274
	1.13528	0.972714
	1.11978	1.01672
	1.02284	1.05381
	0.999495	1.06808
	1.09528	1.00556
	1.09661	1.07966
	0.961634	1.03303
	1.11717	0.97944
	1.02074	1.03784
	1.20639	0.989797
	1.04505	0.992086
	1.02254	1.0706
	1.12562	0.85657
	1.08897	1.02915
	1.07663	0.941203
	1.11114	0.982899
	1.06339	0.979646
	0.998717	1.00585
	0.990038	1.05887
	0.928567	0.961634
	1.14914	1.05378
	1.06013	1.03395
	1.1135	1.07989
	1.01756	1.11735
	1.01891	0.950264
	1.10756	0.98803
	0.881208	0.989767
	1.13818	1.02782
	0.982814	1.07783
	0.96555	0.86277
	1.15433	0.989229
	1.12582	0.979129
	1.14239	0.98683
	1.08508	1.05434
	1.09205	1.00657
	1.08096	1.0302
	0.990771	1.07286
	1.05268	1.07436
	1.08397	1.00818
	1.15752	1.05787
	1.10225	1.03041
	0.88905	1.01201
	1.11144	0.951474
	1.14108	0.91298
	0.961243	1.00147
	1.07808	1.00742
	1.03153	0.981393
	1.03075	1.09752
	1.12855	1.06502
	1.08762	1.00026
	1.15065	1.1027
	1.00947	0.983502
	1.00407	1.06811
	1.02322	0.961117
	0.993813	1.04663
	1.11479	1.08587
	0.979466	0.938808
	1.08213	0.999812
	1.04248	0.983923
	1.07828	1.00342
	1.08731	1.10957
	1.07898	1.06292
	1.01966	1.00322
	1.02319	1.05197
	1.11925	0.985319
	1.05642	0.987593
	1.0519	1.0483
	1.14926	1.02939
	1.04352	1.03962
	0.909993	0.955982
	1.00971	0.995158
	1.02912	1.12174
	1.05594	0.97442
	1.11217	0.887569
	1.13417	0.90534
	1.00242	0.970731
	1.05831	1.0593
	1.10595	1.07897
	1.03734	0.983733
	1.00527	1.04907
	1.08742	0.996719
	0.969586	1.00132
	1.08964	0.960013
	1.10387	1.02904
	1.06953	0.981438
	1.11317	1.04141
	1.0391	0.910048
	1.02389	1.07181
	1.09666	0.943853
	0.978702	0.984405
	1.0768	0.986233
	1.12283	1.02245
	1.15785	1.08475
	1.11132	0.980259
	0.963015	1.04552
	1.12667	0.997216
	1.09834	1.01479
	1.08078	1.05829
	1.07223	0.931429
	1.07534	1.03016
	0.872544	1.0394
	1.1075	1.08719
	1.02941	0.991955
	1.06195	1.06249
	1.0376	0.959882
	1.05723	1.00307
	1.01962	1.04455
	0.950118	1.04435
	0.982608	0.966323
	1.1198	0.947051
	1.02538	1.01397
	0.934401	1.04039
	1.09365	1.0272
	1.09362	0.984305
	1.00133	1.08044
	1.08244	1.00001
	1.03941	1.10622
	1.11659	1.05545
	1.08773	1.08758
	1.13994	1.09501
	1.09326	0.894295
	1.07892	0.937357
	1.07084	0.990916
	1.01374	1.0854
	1.08231	0.948015
	1.03186	1.072
	1.06563	1.04211
	1.13405	1.07928
	0.941921	1.03846
	1.04172	0.821846
	0.891504	1.03309
	1.08092	1.04214
	1.03446	1.06787
	1.0856	1.00298
	1.05516	0.995444
	1.10262	1.10415
	1.10778	1.06021
	1.10944	0.987663
	1.10214	0.991539
	1.05151	1.08217
	1.00068	1.0717
	1.06283	1.04187
	1.1419	1.06872
	1.10842	0.925214
	0.923547	1.07778
	1.08093	1.04244
	1.02899	1.02561
	1.10329	0.968637
	1.12007	0.937332
	1.12778	0.926243
	1.08107	0.952598
	0.901324	1.00321
	1.14521	1.07248
	1.04302	1.02199
	1.07259	0.998788
	1.05226	1.06235
	1.07647	0.792258
	0.951705	0.947352
	1.07843	0.952397
	1.11264	1.021
	1.11821	1.0018
	1.04687	0.882298
	1.07088	0.851766
	0.997738	0.916308
	1.00259	0.996664
	1.10873	0.941383
	0.97805	0.936494
	1.11999	0.906088
	1.09512	0.923773
	1.03367	1.01433
	0.909702	0.87531
	1.07946	0.970781
	1.01402	0.867935
	1.11532	1.00109
	1.10758	0.890611
	1.08809	0.956559
	1.15791	1.01074
	1.03615	0.911153
	1.05117	0.92669
	0.9231	0.871289
	0.968657	1.04324
	1.07401	0.865375
	1.10445	1.0364
	1.03043	0.964415
	1.05205	0.972131
	1.13955	0.987151
	1.08697	0.983321
	1.11874	0.952252
	1.02012	0.90533
	1.05446	0.993486
	1.15504	0.982171
	1.04177	1.0233
	1.0273	0.942066
	1.00911	0.944657
	1.15908	0.990228
	1.04003	0.938833
	1.10053	1.038
	1.1076	0.926067
	1.03645	1.03472
	1.06899	1.02278
	0.963356	0.885746
	1.0086	0.941469
	1.10855	0.985264
	1.09723	0.993592
	0.998055	1.01186
	1.04889	0.997513
	1.05424	1.00333
	1.10909	0.853909
	1.12161	1.05753
	1.13078	1.03406
	1.11912	1.07214
	1.06463	0.976905
	0.974601	0.860541
	1.10741	0.996348
	1.02359	1.03345
	1.07761	1.00342
	1.00128	0.982091
	1.05223	0.969937
	1.01219	1.01101
	1.06631	0.993396
	0.980956	0.978025
	1.08334	0.841073
	1.05062	1.01028
	0.942483	1.0339
	0.88297	1.04003
	1.03496	1.08885
	1.02833	0.919797
	1.06791	0.957136
	0.946243	0.887764
	1.03502	0.919115
	1.09372	1.06356
	0.972056	0.988768
	1.05833	0.954225
	1.00674	0.924396
	0.904225	0.961624
	1.0439	1.04371
	0.992186	0.947889
	1.02913	0.89678
	1.00278	1.01853
	1.02565	1.00195
	1.03289	1.02652
	0.908316	0.899004
	0.920319	0.913457
	0.951092	0.897348
	1.03874	0.9167
	1.0502	0.868733
	1.04239	1.06243
	0.966519	0.956619
	0.988798	0.969149
	1.0113	0.85661
	1.00179	0.896675
	0.966805	1.02229
	1.04042	0.992021
	0.970505	1.01421
	0.946895	0.946444
	0.939631	1.02925
	0.961208	0.909436
	0.970901	0.979932
	0.954104	0.98069
	1.05048	0.904416
	1.04688	1.06085
	0.984225	1.02121
	0.970866	1.02105
	0.942774	0.968969
	1.04258	0.987181
	0.961429	0.966654
	0.979536	0.94295
	0.965334	0.962864
	0.976609	0.808272
	1.0963	0.903693
	1.06998	0.95047
	0.923909	0.723127
	1.06753	0.920073
	1.01714	0.868046
	1.10468	0.866158
	0.93047	1.00061
	1.0769	0.975685
	1.06771	0.93686
	1.00472	0.937699
	0.869431	1.06568
	0.988125	0.992216
	1.0369	1.02352
	1.10494	0.969134
	0.997226	0.926855
	1.02873	1.0292
	1.07052	1.02931
	0.964144	0.971885
	1.04377	1.0066
	1.00364	1.02851
	1.0087	1.0232
	1.07549	0.969129
	1.08956	1.10434
	0.970911	0.88298
	1.02517	1.0088
	1.05173	0.969124
	1.05286	0.989475
	0.83648	1.03547
	1.08254	1.00186
	1.07263	0.989114
	0.990038	1.00732
	1.04821	0.96173
	1.00895	1.02988
	0.863066	1.0861
	1.07983	0.947935
	1.10438	0.985992
	1.04389	1.09944
	1.02608	1.10032
	1.0256	0.944215
	0.996714	1.06845
	1.07471	0.984561
	1.00471	0.992538
	0.922634	0.950786
	0.895746	1.03877
	0.931303	0.921103
	1.01499	1.03868
	1.11327	0.997854
	0.850079	0.996283
	0.802901	0.957699
	0.944225	1.02297
	1.08837	1.01432
	1.06159	1.01572
	1.0336	0.859466
	0.97818	1.05692
	0.988873	1.01743
	0.774487	0.974541
	1.02928	0.983472
	1.06098	0.889456
	0.934913	1.00196
	0.848814	0.996232
	1.08454	1.00067
	0.910475	0.973738
	1.10147	1.08798
	1.01394	1.10764
	1.07581	1.00748
	0.943778	1.04074
	0.972161	0.927528
	1.06812	1.01548
	1.04503	1.02481
	1.07464	0.963301
	1.04662	1.002
	1.01273	0.977698
	1.06976	1.00449
	1.01112	0.871043
	1.06932	0.999134
	0.983286	0.963447
	1.14902	0.996564
	0.995429	0.936685
	0.800145	0.976599
	1.0706	0.999556
	0.981032	1.00747
	1.03711	0.914848
	0.907985	0.983552
	0.997578	1.03243
	0.893527	0.974707
	1.01898	0.993627
	0.946067	1.04812
	1.01455	0.872107
	1.00838	0.967377
	1.02404	0.912403
	0.997894	1.01875
	1.03804	1.01804
	1.10295	0.995971
	1.0823	0.980394
	1.01135	1.07316
	0.978416	0.946524
	1.05393	0.923999
	1.00476	0.951509
	1.10161	0.940329
	1.0076	0.944872
	0.967247	1.04868
	1.06173	0.93543
	1.0305	0.979169
	0.993707	1.09372
	0.933668	0.994952
	0.927784	1.0141
	0.994711	0.990816
	1.07086	0.967744
	1.03824	0.979822
	0.971956	0.953181
	1.05772	0.895445
	1.03749	0.948296
	1.01235	0.861078
	1.00553	0.995851
	1.04581	0.92183
	1.04419	0.896715
	0.960319	0.934867
	0.936122	1.02473
	1.0171	0.973256
	0.995359	0.972116
	0.952633	0.915038
	1.03959	0.980439
	0.977463	1.05807
	1.01197	0.879135
	1.07602	1.01444
	0.972704	1.02871
	1.0765	0.980967
	0.977463	0.970088
	1.01198	0.961248
	1.11424	0.96689
	0.98933	1.06274
	0.959365	0.96427
	1.07676	0.979952
	1.07623	0.955671
	1.11357	0.967975
	1.02215	0.941097
	1.15202	1.03862
	1.13077	0.994109
	1.03175	1.06564
	1.08753	0.975294
	1.09216	1.01364
	1.06339	0.978502
	1.12352	0.986629
	1.03107	0.867047
	1.05896	0.911569
	0.954551	1.00567
	1.06224	0.964084
	0.966223	0.984345
	0.962422	0.97677
	0.967292	0.933889
	1.00718	1.0104
	1.052	0.918412
	1.03764	1.00332
	1.10258	0.900485
	1.0458	1.0141
	1.09895	0.905189
	1.08763	0.914521
	1.03573	0.933397
	0.929029	0.963005
	1.09075	0.954717
	1.0239	0.938336
	0.998617	0.986519
	1.08981	1.00434
	1.04212	0.948627
	1.00356	1.02908
	1.02485	1.04751
	1.0067	0.977493
	1.04652	0.89534
	1.0713	0.964019
	0.942428	1.05799
	0.871329	0.876575
	1.08728	0.986107
	1.11128	0.972934
	0.983231	1.05682
	1.02232	0.920455
	1.04111	0.890008
	0.918758	1.02729
	0.795727	1.02734
	1.09502	1.00914
	0.986644	0.925354
	1.07989	0.992226
	1.00587	0.928567
	1.06015	1.07908
	1.01256	0.904421
	0.973316	0.875601
	1.0526	0.87281
	1.07489	0.955906
	0.930043	0.932443
	0.998692	1.01494
	1.12165	1.06529
	1.09933	0.980269
	1.11062	0.996002
	1.02179	0.980259
	1.00473	1.00577
	1.05492	0.925987
	1.10347	0.899125
	0.989465	1.03624
	0.97045	0.939416
	1.11739	0.971464
	0.999511	1.03697
	1.11925	1.00058
	1.02117	1.02425
	1.06802	1.03889
	0.982573	0.971469
	0.964029	1.01106
	1.01268	0.971524
	0.887619	0.891032
	1.05412	0.977307
	0.980178	0.977377
	0.975972	1.04518
	1.05689	1.11196
	0.918462	0.911911
	1.04997	1.02175
	0.994937	0.93804
	1.01529	0.994395
	1.06589	1.02704
	1.07648	0.988973
	1.00313	1.0388
	1.13287	0.89922
	1.14483	0.949411
	1.13483	0.9004
	1.07559	1.00984
	1.04596	0.883292
	1.08225	0.918095
	0.989606	0.9768
	0.97676	1.02975
	1.04947	0.975771
	1.14312	0.861776
	1.11186	0.844632
	1.00298	1.03813
	1.00212	1.04687
	1.05	1.03972
	1.09775	0.925786
	1.06008	0.893788
	1.1104	0.910942
	0.927413	0.957081
	1.12797	0.978492
	1.11198	0.96798
	1.00238	0.970821
	0.983472	0.873728
	1.11129	0.957674
	1.1252	0.955314
	1.147	0.954807
	1.04605	1.03042
	1.05983
	0.98438
	1.07744
	1.06191
	1.03165
	0.990891
	1.00955
	1.00709
	1.00719
	1.00757
	1.01808
	1.01396
	1.02711
	0.998225
	0.970936
	1.03427
	0.905515
	0.996473
	1.06294
	0.954079
	1.10932
	0.957679
	1.02527
	1.02814
	1.10846
	1.11701
	1.00643
	0.944988
	0.994114
	1.09655
	1.0356
	1.04093
	1.01749
	1.07254
	1.10913
	0.989189
	0.96544
	1.01561
	0.962051
	0.993677
	1.13976
	0.977156
	1.09837
	0.937664
	1.05545
	1.07834
	1.09845
	1.06702
	1.02108
	1.03792
	1.04076
	0.939421
	1.02936
	0.983974
	1.12862
	1.02378
	0.86792
	0.987186
	1.03414
	0.980761
	0.998376
	1.00004
	1.04438
	0.912403
	1.05333
	1.0124
	1.07119
	1.01888
	1.06148
	0.965259
	1.0631
	1.14306
	1.01927
	1.02487
	1.06229
	1.03324
	1.02649
	1.00022
	1.03138
	1.07012
	0.917749
	1.0969
	1.04468
	1.00688
	1.05135
	1.04253
	1.00986
	1.05028
	0.96678
	1.06453
	1.04933
	1.09909
	1.01631
	1.04662
	1.10594
	1.00492
	1.00177
	1.06554
	0.935932
	1.04334
	1.06226
	0.977558
	1.05508
	0.956358
	1.06072
	0.978562
	0.962839
	1.00379
	1.04924
	1.05787
	1.02628
	1.13025
	1.04241
	1.02326
	1.0438
	1.08432
	1.03816
	1.06346
	1.03047
	1.00087
	1.01292
	1.09217
	1.10273
	0.956273
	1.10226
	1.02314
	1.12413
	1.08991
	0.990791
	1.08463
	0.89801
	1.07599
	1.1321
	0.958326
	1.01319
	1.09014
	1.01975
	1.00823
	1.08557
	0.96174
	1.06165
	1.02514
	0.919943
	1.02301
	1.04165
	1.10151
	1.06111
	1.07171
	1.0818
	1.08623
	1.04839
	0.999556
	1.00449
	1.07874
	1.12084
	1.07632
	1.14058
	1.06757
	0.96188
	1.06943
	1.10623
	1.08175
	1.00275
	1.00499
	1.11968
	1.00663
	1.02745
	1.13323
	1.00658
	1.0857
	0.962282
	1.12422
	0.941268
	1.02528
	0.96807
