# Supplementary material for: Cholecystokinin modulates age-dependent thalamocortical neuroplasticity
Source: eLife journal article supplement (doi:10.7554/elife.101513), 2024-10-14
Supplement: data1 [file Figure 3C.xlsx]

## Sheet: P20
	200626-1-2	200627-1	200703-1_No.1	200703-1_No.2	200713_1	200713_2	200714_1	200714_2	200724_2_No.1	200724_3_No.2	200724_4_No.2	200729_1	200729_2	200730_1	200730_2		n=15 N=10
	1.04778	1.02108	0.981516	0.905542	0.993573	0.973633	0.931521	1.0853	0.968992	1.05608	1.00754	1.02769	0.98261	1.05733	1.04373												1.00559	0.0128461	0.0497528
	1.01453	1.05373	0.910727	1.02273	1.01547	1.03809	1.0594	0.958397	1.0783	0.995494	1.03219	0.99991	1.04594	0.836993	0.923412												0.999022	0.0169391	0.0656048
	0.922171	1.00326	0.818178	1.13307	0.990407	0.979163	0.985611	1.0136	0.998353	1.02794	0.950467	1.03697	1.10032	0.990989	0.991855												0.996158	0.0185612	0.0718871
	0.906277	0.807041	1.15395	0.87145	1.01663	1.02343	0.999581	0.922088	0.973634	0.977117	1.09686	0.928814	0.853334	0.926925	1.01524												0.964825	0.0236371	0.091546
	0.9585	1.18678	0.960909	1.15572	1.00452	1.0493	0.997898	1.11315	0.995324	1.01129	0.94163	0.980467	1.00253	0.958147	0.934084												1.01668	0.0199416	0.0772335
	1.0389	0.967519	1.12561	0.901323	0.982491	0.982362	0.918556	1.03268	1.02714	1.08294	1.04198	1.05389	1.07173	1.15702	1.05611												1.02935	0.0180886	0.0700567
	1.07455	1.01882	1.03511	1.00587	0.984158	1.00545	0.986505	0.856958	0.955625	0.869551	0.97581	0.981458	1.01773	1.03976	0.976706												0.985603	0.0150152	0.0581535
	1.0373	0.94178	1.01401	1.00429	1.01276	0.948575	1.12092	1.01783	1.00263	0.979587	0.953521	0.990806	0.925793	1.03284	1.05886												1.00277	0.0129737	0.0502471
				1.09091	0.937563	1.04569	0.894494	1.00417	0.794855	0.93099	0.685891	0.758145	0.847292	0.817364	0.89843												0.89215	0.0308286	0.119399
		0.637483	0.923007	1.1003	0.951129	0.956957	1.00645	0.86124	1.01319	0.845412	0.854059	0.839465	0.852284	1.0122	0.943704												0.914062	0.0289852	0.112259
		1.00801	0.976267	1.11196	1.01215	0.923836	0.994647	1.0783	0.972023	0.7701	0.773403	0.792865	0.850463	0.94428	0.921769												0.937863	0.0277986	0.107664
		1.15246	0.88325	0.817955	1.03819	0.925464	1.16024	0.905499	1.03689	0.805321	0.863533	0.855827	0.931448	0.914128	0.914325												0.943181	0.0290468	0.112498
		1.23165	0.781266	0.994804	1.06215	1.02225	1.00147	0.93688	1.08869	0.782062	0.99629	0.781344	0.862381	0.908852	1.016												0.961864	0.0336045	0.13015
		0.742409	1.20705	0.991235	0.993753	1.06332	0.834942	0.92738	1.00772	0.751024	1.01262	0.790259	0.920492	1.12705	1.03219												0.957245	0.0358037	0.138667
		1.15307	0.940166	0.724693	0.9984	0.900517	1.12426	0.887244	1.02498	0.842134	1.01217	0.802018	0.81432	1.07626	1.06412												0.954597	0.0336873	0.13047
		0.906788	0.747595	0.814804	0.949914	0.970886	0.995927	1.12326	1.00223	0.917161	0.948332	0.898825	0.965478	1.02805	1.03819												0.950532	0.0242011	0.0937306
		0.756684	1.09763	1.03029	0.972123	1.02522	0.92459	0.923562	1.04496	0.806361	0.861998	0.827007	1.05473	1.02898	1.10463												0.961339	0.0290834	0.112639
		1.06885	1.12357	0.938915	0.921933	0.944314	1.1066	1.05707	0.948356	0.789295	0.945592	0.848958	0.828681	1.09401	1.00454												0.972906	0.0275798	0.106816
		0.781224	0.710522	1.0482	0.940495	1.02478	0.994452	1.10446	0.989049	0.749696	0.994108	0.94458	0.892755	0.928315	1.07171												0.941024	0.0310539	0.120271
	0.930383	0.809294	1.33595	0.842211	0.968544	1.04313	0.985635	0.928102	1.02207	0.799721	0.918084	0.877491	0.90379	1.00776	1.06946												0.962775	0.034008	0.131712
	0.968542	1.09326	1.33574	1.15589	0.987758	1.04174	1.03505	0.902499	1.02062	0.886151	0.909253	0.957769	0.896069	0.910232	1.06879												1.01129	0.0312002	0.120838
	1.13205	0.991464	0.994309	0.868492	0.97513	0.984305	1.1042	0.897184	0.983746	0.846761	0.871667	0.890646	0.915734	0.842436	1.06161												0.957316	0.0236744	0.0916904
	1.08728	1.30474	0.969497	0.997504	0.978871	1.16122	1.0249	0.993985	1.02689	0.931024	0.933157	0.899102	0.888985	1.00425	0.963562												1.011	0.0276454	0.10707
	1.04735	1.30596	0.960386	1.00411	0.966242	1.00486	1.08325	0.933485	0.968239	0.83988	0.878571	0.898057	0.974494	0.952487	1.023												0.989358	0.0279013	0.108061
	0.823401	1.00621	1.26382	1.16742	0.941486	1.04658	1.04976	0.989039	0.984854	0.855123	0.898902	0.920804	0.838817	1.01448	1.00881												0.9873	0.0307528	0.119105
	1.34888	0.934011	0.848823	0.907612	1.03923	0.992945	1.18466	0.957508	1.11377	0.881638	0.979825	0.92473	1.00584	1.00874	1.01145												1.00931	0.0328721	0.127313
	0.996726	1.42797	1.18911	1.11802	0.983092	0.972116	0.962117	1.04036	1.12699	0.870973	0.883746	0.979496	0.916325	1.02623	0.977533												1.03139	0.0363261	0.140691
	1.31474	1.16906	1.00359	1.30975	1.01769	0.997416	0.958346	1.03286	1.00647	0.733208	0.896752	0.906792	1.00919	0.920316	1.07074												1.02313	0.0390797	0.151355
	1.35847	1.24969	0.905775	1.32626	0.961657	0.949437	1.15526	0.930253	1.01466	0.798422	0.936406	0.981967	1.10819	0.997533	0.936105												1.04067	0.0422782	0.163743
	1.19918	1.48969	0.828666	0.837873	0.925671	0.978718	1.06793	1.00174	0.993354	0.791357	0.8951	0.999841	1.1222	1.12508	1.02877												1.01901	0.0450538	0.174493
	1.22195	0.823282	1.29126	0.909948	1.00616	1.05798	0.862555	0.917205	1.10749	0.890176	0.914757	0.960768	1.04362	0.892369	1.07312												0.998175	0.0347633	0.134637
	1.21544	0.988006	1.2364	0.849264	0.980453	1.04311	1.12778	0.966859	1.07287	0.898219	0.940484	0.926273	1.05107	0.982833	1.00337												1.01883	0.0282062	0.109242
	1.34618	1.46292	0.953976	0.998228	0.928605	0.97103	0.998073	0.978573	1.05391	0.805948	0.85611	0.979859	0.84932	0.924371	0.975775												1.00553	0.0454021	0.175841
	1.51901	1.16547	1.29653	1.19903	0.929304	1.016	1.01712	1.04961	0.977343	0.855628	0.970345	0.978781	0.980598	0.944359	1.03966												1.06259	0.0437136	0.169302
	1.40133	0.918524	1.10137	0.932633	0.949979	1.07303	0.9733	1.01128	0.953692	0.783244	0.92304	0.890886	0.877454	0.93772	1.01452												0.9828	0.0360436	0.139596
	1.3338	1.31166	0.973801	0.935809	1.0458	0.919185	0.916383	1.06378	1.12916	0.832511	0.909913	1.03057	1.12757	1.08419	0.991714												1.04039	0.0368906	0.142877
	0.975435	0.880153	1.10272	1.01428	0.937053	0.991566	1.07981	1.00618	1.07511	0.828573	0.903688	1.00509	0.931849	1.09096	0.984395												0.987125	0.020836	0.0806975
	1.26643	1.20595	1.18099	1.05287	0.993909	1.08924	1.01748	0.968384	0.911969	0.808388	0.919738	0.959866	1.06393	1.00662	1.07524												1.03473	0.0310508	0.120259

## Sheet: P53
	200805_1	200807_1	200904-1	200904-2	201016-1	201016-2	201016-3	201023_1	210129-3	201203-3	201211_4	201212_4	200130-2		n=13 N=10												mean	se	sd
	0.977606	1.09201	0.926402	0.89121	0.966597	0.966952	0.98473	0.979309	1.04379	0.997196	0.927263	0.922588	1.01214														0.975984	0.014967	0.0539644
	0.923505	0.949814	1.06809	0.892215	1.0285	0.990714	1.00191	1.01753	0.964363	0.958754	1.0742	1.09792	0.965109														0.994817	0.0169401	0.0610784
	0.952941	0.980872	0.952667	1.05289	0.965513	1.0411	1.03796	1.01592	0.926834	1.10302	0.972108	0.993433	0.926887														0.994011	0.0147322	0.0531177
	1.03713	1.06634	0.924596	1.11379	0.954367	0.992245	0.995446	1.01412	0.963144	0.926003	1.04587	1.0913	0.996021														1.00926	0.016593	0.0598268
	1.01017	1.11751	1.03136	0.826787	1.00187	0.979978	0.995607	1.00974	1.04923	1.10162	0.984757	1.0197	1.012														1.0108	0.0191849	0.0691723
	1.01305	0.921658	1.06917	1.09651	1.07248	0.99773	1.02747	0.976199	1.01075	0.953019	1.0022	0.948476	1.06025														1.01146	0.0147395	0.0531439
	1.05168	0.92004	1.06142	1.17548	1.04817	1.01781	0.957754	1.05161	0.963975	0.968909	1.04664	1.08084	0.949487														1.0226	0.0192157	0.0692832
	1.03392	0.951756	0.966301	0.951117	0.962506	1.01347	0.999125	0.935574	1.07791	0.991473	0.946964	0.845735	1.07811														0.981075	0.0173466	0.0625442
		1.2386	1.05154	1.58717	1.33458	1.16721	1.1872	1.34675	1.2976	1.50224	1.68102	1.65613	1.09211														1.34518	0.0599152	0.216027
		1.178	1.14508	1.62451	1.14794	1.19028	1.1652	1.33516	1.27464	1.52524	1.52935	1.39295	1.11759														1.30216	0.0490892	0.176994
		1.16354	1.26541	1.52174	1.11757	1.13853	1.10882	1.36546	1.23908	1.38744	1.29097	1.13137	1.21495														1.24541	0.0355299	0.128105
		1.15367	1.1235	1.70168	1.09936	1.13798	1.14624	1.38353	1.33085	1.41935	1.08247	1.38248	1.27752														1.26989	0.0508652	0.183397
		1.14933	1.13488	1.64344	1.31165	1.13067	1.10498	1.4819	1.23746	1.44692	1.13144	1.20634	1.17171														1.26256	0.0480505	0.173248
		1.23884	1.03993	1.32887	1.35204	1.14136	1.13537	1.35748	1.21952	1.28695	1.27263	1.21645	1.12439														1.22615	0.0277686	0.100121
		1.16273	1.05088	1.51803	1.23879	1.05419	1.19616	1.46912	1.22129	1.38481	1.18201	1.20245	1.12303														1.23362	0.0415831	0.14993
		1.22091	1.07518	1.32661	1.14822	1.06772	1.13639	1.45384	1.20866	1.38632	1.12422	1.11914	1.19179														1.20492	0.0342307	0.123421
	1.77922	1.32264	1.23392	1.57187	1.17532	1.06499	1.13668	1.3112	1.24585	1.59156	1.08964	1.14654	1.24695														1.30126	0.0601575	0.216901
	1.57053	1.17217	1.12247	1.69227	1.25346	1.10604	1.12909	1.52823	1.1553	1.31746	1.26648	1.31336	1.08711														1.28569	0.0543734	0.196046
	1.56281	1.36272	1.18934	1.5787	1.11057	1.16747	1.13086	1.40759	1.18393	1.35349	1.1134	1.05734	1.33178														1.27308	0.0479165	0.172765
	1.4832	1.22371	1.18881	1.60172	1.09219	1.10555	1.15166	1.51455	1.1816	1.46636	1.15917	1.15915	1.25859														1.27587	0.0485244	0.174957
	1.25293	1.2741	1.20696	1.61762	1.08753	1.1529	1.21364	1.72641	1.23556	1.29491	1.17379	1.47844	1.1657														1.2985	0.0530148	0.191147
	1.39427	1.24436	1.12301	1.73391	1.17393	1.20996	1.22964	1.62979	1.17003	1.54933	1.30749	1.0731	1.24227														1.31393	0.0566539	0.204269
	1.27894	1.22325	1.16759	1.47703	1.13084	1.25123	1.18356	1.75247	1.0929	1.4291	1.21196	1.43202	1.214														1.29576	0.0504075	0.181747
	1.25943	1.28421	1.12029	1.45484	1.11655	1.22389	1.2793	1.60107	1.09437	1.25904	1.20159	1.16505	1.354														1.26259	0.0396512	0.142965
	1.21371	1.28323	1.04	1.3746	1.2274	1.18892	1.2487	1.45551	1.16518	1.53091	1.27227	1.26401	1.31523														1.27536	0.0350111	0.126234
	1.35804	1.21855	1.27422	1.80287	1.16653	1.17718	1.13588	1.63127	1.17903	1.51623	1.20375	1.33366	1.34673														1.33415	0.0561547	0.202469
	1.163	1.28748	1.25881	1.75145	1.21424	1.20529	1.1409	1.65356	1.22375	1.43771	1.22896	1.16331	1.31478														1.31102	0.0530007	0.191097
	1.32558	1.17425	1.19978	1.61704	1.08728	1.16341	1.17335	1.68407	1.13379	1.32601	1.26457	1.31788	1.31353														1.29081	0.0495779	0.178756
	1.26065	1.4156	1.18501	1.43999	1.10074	1.09391	1.25374	1.52832	1.15476	1.49856	1.04936	1.17291	1.31832														1.26707	0.0445706	0.160702
	1.25462	1.17703	1.11519	1.4561	1.1377	1.10256	1.24748	1.67957	1.22106	1.59487	1.11967	1.14466	1.36935														1.27845	0.0528939	0.190712
	1.19013	1.23191	1.20354	1.41963	1.2009	1.08855	1.20383	1.4291	1.30087	1.72028	1.36614	1.05037	1.41268														1.29369	0.0491125	0.177078
	1.27685	1.2221	1.02211	1.38005	1.10512	1.08344	1.22205	1.55396	1.27625	1.33998	1.23968	1.40605	1.34664														1.26725	0.0401091	0.144615
	1.17368	1.2492	1.15661	1.47263	1.23586	1.11964	1.17076	1.49858	1.20123	1.53346	1.30507	1.07609	1.3725														1.27425	0.041813	0.150759
	1.1863	1.30161	1.01947	1.36314	1.12885	1.09529	1.20527	1.51239	1.21512	1.40289	1.22884	1.07979	1.34699														1.23738	0.0395059	0.14244
	1.22389	1.28975	1.17552	1.61414	1.28912	1.12859	1.29035	1.69855	1.24041	1.60852	1.29919	1.10538	1.3639														1.33287	0.0528158	0.19043
	1.12699	1.28106	1.27334	1.6441	1.31541	1.1747	1.21467	1.59835	1.24858	1.4625	1.37611	1.17438	1.37465														1.32806	0.0444047	0.160103
	1.16851	1.24832	1.09687	1.78914	1.20424	1.19878	1.29668	1.80516	1.32381	1.43841	1.22821	1.04745	1.3915														1.32047	0.0652105	0.23512
	1.08423	1.27489	1.07611	1.43517	1.1844	1.13619	1.28889	1.59874	1.20711	1.72804	1.23681	1.37125	1.39642														1.30182	0.0539644	0.194572

## Sheet: 18m
	20210511_1	20210517_1	20210517-2	20210225-1-1	20210225-1-3	20210225-2-2	20210225-2-3	20210225-3	20210226-1	20210227-1-3	20210227-1-4	20210227-2	20210227-3	20210301-1	20210302-1	20210302-2	20210303-1-3	20210303-1-1
	1.15597	1.00542	1.0713	0.942823	0.970356	1.00408	0.904304	0.980213	1.0103	0.908944	0.924061	0.923372	0.995284	1.08505	1.11432	0.991989	1.03187	1.00579		n=18 N=8							1.00141	0.0166267	0.0705412
	0.901465	0.99723	0.967827	0.98576	0.929017	1.02572	0.923426	1.05178	1.00395	0.985294	1.08112	1.0545	1.03855	1.07681	0.948885	0.962554	0.967263	1.03001									0.996175	0.0125363	0.053187
	1.05228	0.938287	0.993896	1.01945	0.960841	1.02422	0.962039	0.975489	1.02408	1.03517	0.848262	0.979804	0.966322	0.995856	0.992152	0.94393	0.972937	0.950383									0.979745	0.0109268	0.0463583
	0.933182	1.07847	1.0511	1.01918	0.995868	0.989523	1.11012	1.05579	0.991657	1.00989	1.12154	0.921416	0.988338	0.963612	1.09597	0.958535	1.01483	0.914811									1.01188	0.0148421	0.0629698
	0.746506	0.988462	0.924938	0.988713	1.14752	0.968768	1.10246	1.02088	0.975962	0.980193	1.12207	1.09552	0.997419	0.911126	0.925451	1.04573	0.933158	1.08642									0.99785	0.0225954	0.0958641
	1.05332	0.999244	1.00121	0.987479	0.980538	0.974965	1.01349	1.00998	0.974999	1.08725	0.939453	1.06886	1.02558	0.967121	0.977326	1.03702	0.9601	0.880616									0.996586	0.0114602	0.0486215
	1.09458	0.999788	1.03621	1.04554	1.01231	0.997185	0.841844	0.92514	1.04437	1.02018	0.987504	0.943577	0.993505	0.983283	0.855804	1.04151	1.06657	1.04659									0.996418	0.0159692	0.0677514
	1.06269	0.993105	0.953509	1.01106	1.00355	1.01554	1.14231	0.980729	0.974681	0.973072	0.975997	1.01295	0.995001	1.01715	1.09009	1.01873	1.05327	1.08537									1.01993	0.0115767	0.0491156
	0.909167	1.14686		1.35252	1.05972	1.20327	1.2733	0.928315	1.03803	1.14331	1.1849	1.01653	1.09933	0.880258	1.09009	0.823844	1.01251	0.996448									1.06814	0.0333247	0.141385
	1.3162	1.12959		1.31968	1.15993	1.26108	1.27449	0.85726	0.996139	0.979161	1.17257	0.925717	1.09056	0.985767	0.847747	0.891852	0.936497	1.02672									1.06888	0.0378021	0.160381
	1.11496	1.19497		1.30988	1.28931	1.11252	1.2684	1.05233	1.01794	1.09986	1.1941	0.896361	1.11957	0.900515	0.942591	0.918619	0.991426	1.23637									1.09763	0.032549	0.138094
	1.36525	1.06395		1.29219	1.26723	0.994341	1.19173	1.06913	0.98912	1.06268	1.00843	0.967962	1.11167	0.885084	0.833306	0.936837	0.965371	1.08404									1.06402	0.0342094	0.145138
	1.26526	1.11189		1.29553	1.19064	0.946241	1.14823	0.939664	0.938071	0.952839	1.27949	1.10057	1.07519	0.854233	0.91216	1.05229	1.00507	0.959016									1.06038	0.0326197	0.138394
	1.18239	1.18068		1.16645	1.22793	1.18724	1.23302	0.9476	0.956939	1.10219	1.03428	1.06336	1.01629	1.02036	0.932832	0.985345	1.02887	0.967289									1.07253	0.0245112	0.103992
	1.32062	1.19646		1.27048	1.23941	1.00022	1.24053	1.0728	0.886794	1.04273	0.937448	1.05698	1.03846	1.01315	1.04976	1.01919	0.985839	1.14209									1.089	0.0292891	0.124263
	1.26797	1.11859		1.19185	1.17147	1.1586	1.37144	0.965916	0.940214	1.04398	1.06955	0.88786	1.07708	0.920194	0.830991	0.941609	0.998128	0.961884									1.05396	0.0341326	0.144812
	1.01718	1.25094		1.2563	1.11133	1.15198	1.30166	0.930461	0.88677	1.00229	1.01295	0.820773	1.06025	0.858547	0.947287	1.04177	0.961204	1.22514									1.04923	0.0345889	0.146748
	1.13159	1.15045		1.26932	1.33998	1.06857	1.13772	0.944306	0.902247	1.06671	1.14207	0.900392	1.02424	0.917717	1.077	1.02003	0.89929	1.04089									1.06074	0.0301469	0.127902
	0.907194	1.08215		1.29067	1.25863	1.01076	1.1602	0.901551	0.892682	0.962482	1.0698	1.11702	1.06615	0.872879	0.978274	1.06011	0.924653	1.08257									1.03752	0.0292791	0.124221
	1.21811	1.1979		1.2017	1.30163	0.999545	1.2059	0.95943	0.835453	1.0064	1.233	1.00809	1.02507	0.932961	0.906026	1.01491	0.909117	0.933174									1.05226	0.0335609	0.142387
	1.24901	1.17969		1.21464	1.17261	0.962076	1.10884	1.07806	0.825336	0.952715	1.09668	0.928591	0.992654	0.787335	0.93166	0.960973	0.938243	0.985793									1.02147	0.0314237	0.133319
	0.951561	1.20179	1.16726	1.21361	1.06003	1.07529	1.33517	0.997413	0.817347	0.855516	0.93748	1.01352	0.959278	0.876092	1.12362	1.00822	0.925747	1.13132									1.03613	0.0327521	0.138955
	1.10399	1.24655	1.19113	1.1579	1.07724	1.07221	1.06507	1.09296	0.913249	0.963219	0.981079	0.955002	0.943391	0.873315	0.940182	1.00215	0.98336	0.996334									1.03102	0.0238589	0.101225
	0.826483	1.24105	1.15947	1.22345	1.30501	1.02578	1.35959	1.05421	0.840689	0.910305	1.16882	0.831087	1.0449	0.861645	0.824498	1.04708	0.893991	1.08249									1.03892	0.0414179	0.175721
	1.07979	1.22421	1.03419	1.22526	1.25033	1.05092	1.19367	1.07619	0.756858	0.945914	1.04481	0.851073	1.04496	0.871529	0.825539	1.09514	0.895107	1.06936									1.02971	0.034361	0.145781
	1.27438	1.26647	1.18047	1.10461	1.12673	1.17737	1.31357	0.889972	0.769926	0.913684	1.08676	0.947078	0.990087	0.824902	0.870961	0.997008	0.874062	1.0902									1.03879	0.0388896	0.164995
	0.816502	1.14673	1.17406	1.18095	1.16655	1.07522	1.31011	0.981407	0.809754	0.915203	1.03198	0.817547	1.1061	0.848719	0.749323	0.992929	0.9633	0.996572									1.00461	0.0372175	0.1579
	0.808828	1.07625	1.16044	1.22657	1.18217	1.01849	1.25229	1.03825	0.8755	0.904638	0.967253	0.856782	0.972866	0.834227	0.865405	1.06684	0.920975	0.900679									0.996024	0.032883	0.139511
	1.12281	1.25358	1.39095	1.22225	1.18988	1.11588	1.08126	0.893711	0.834093	1.05347	1.07648	1.08491	1.00376	0.83102	0.91998	1.0247	0.898687	0.998554									1.05533	0.0353871	0.150135
	1.10894	1.09445	1.22841	1.22662	1.17374	1.05554	1.2054	1.00926	0.838987	1.07356	1.23829	0.962937	0.994527	0.830579	1.04867	0.997057	0.949748	0.946171									1.05461	0.0298263	0.126542
	1.03453	1.0997	1.1654	1.20517	1.11858	1.0742	1.32813	0.906446	0.822516	0.975638	1.17763	0.990576	1.08933	0.813897	1.00422	1.03559	0.899821	1.12905									1.04836	0.0317674	0.134778
	1.22372	1.13524	1.15432	1.28854	1.15065	1.00614	1.33675	1.04168	0.728789	0.902343	1.19321	0.924117	1.0442	0.763467	0.828841	0.99487	0.969556	1.07023									1.04204	0.0404525	0.171626
	1.31123	1.12645	1.18844	1.21751	1.11493	1.1592	1.28714	0.909324	0.832253	1.05412	1.01997	0.929789	1.02794	0.72668	1.07787	1.02832	0.914295	1.10149									1.05705	0.036277	0.15391
	1.28397	1.14447	1.19343	1.20301	1.09869	1.07153	1.32617	0.887735	0.796434	0.94347	0.9257	1.02172	1.03803	0.784235	1.14283	1.06303	0.910875	1.18914									1.05692	0.0371535	0.157629
	0.917241	1.16657	1.25238	1.14619	0.976018	1.04667	1.27459	0.98063	0.786496	1.02174	1.07787	0.896472	1.05238	0.759011	0.918782	1.11256	0.87115	1.0542									1.01727	0.0340741	0.144564
	0.935313	1.1748	1.32427	1.28853	1.18068	1.08713	1.24041	0.950309	0.767388	0.981917	1.10192	0.990043	1.04437	0.837449	0.744764	1.00006	0.933858	1.0568									1.03556	0.0390636	0.165733
	1.03551	1.15854	1.30388	1.28799	1.1929	1.07504	1.12198	0.979491	0.750087	0.86482	0.905946	0.915245	1.02642	0.79163	0.97328	1.01648	0.955819	1.1819									1.02983	0.0370788	0.157312
	0.979382	1.18397	1.3421	1.32267	1.13013	1.0206	1.1666	1.01843	0.735983	1.02326	1.14825	0.899596	1.02456	0.734856	0.821577	1.04567	0.937198	0.935473									1.02613	0.0405769	0.172153
