# Supplementary material for: Cholecystokinin modulates age-dependent thalamocortical neuroplasticity
Source: eLife journal article supplement (doi:10.7554/elife.101513), 2024-10-14
Supplement: data1 [file Figure 3F.xlsx]

## Sheet: aged
Time	0313_1 side_1	0313_1 side_3	0313_2 side_1_1	0313_2 side_1_2	0313_2 side_1_3	0314_ 1 side_1_7	0314_ 1 side_2_3	0314_ 2 side_2	0316_ 1 side_2	0316_ 1 side_4	0316_ 2 side_9	0316_ 2 side_7						N=6,n=12	sd	se
-24.9545	0.159093	-0.135756	0.161754	0.249242	0.172906	0.126267	0.108094	0.102953	0.117516	0.0416401	-0.187834	-0.272526						0.0536125	0.155658	0.0449347
-24.8562	0.168741	-0.138961	0.16843	0.24448	0.176618	0.127763	0.106063	0.112677	0.117093	0.0191855	-0.211352	-0.263597						0.0522616	0.158861	0.0458592
-24.7579	0.178135	-0.138978	0.171148	0.237289	0.183034	0.128312	0.10116	0.116895	0.110572	-0.00572104	-0.238832	-0.254677						0.0490281	0.16223	0.0468318
-24.6596	0.186805	-0.138494	0.173655	0.225672	0.188937	0.130822	0.0962051	0.121346	0.102526	-0.032144	-0.267007	-0.247558						0.0450639	0.166259	0.0479949
-24.5613	0.195389	-0.135969	0.176221	0.210147	0.193097	0.132845	0.0964479	0.124846	0.0958529	-0.0608798	-0.289903	-0.240042						0.0415044	0.169703	0.0489891
-24.4629	0.20517	-0.127591	0.176614	0.19473	0.195148	0.136821	0.0974762	0.12841	0.0913615	-0.0912232	-0.30762	-0.228732						0.0392136	0.172106	0.0496826
-24.3646	0.215238	-0.12051	0.175377	0.180414	0.19914	0.142938	0.0945782	0.1264	0.0935685	-0.116831	-0.327597	-0.213841						0.0374062	0.175078	0.0505407
-24.2663	0.224008	-0.112405	0.17228	0.16635	0.204916	0.144975	0.0907004	0.120437	0.0971516	-0.144372	-0.345689	-0.201387						0.0347472	0.178362	0.0514888
-24.168	0.229012	-0.103222	0.167983	0.152265	0.211726	0.14802	0.0849495	0.116976	0.103451	-0.168626	-0.357307	-0.198933						0.0321913	0.181679	0.0524461
-24.0697	0.229742	-0.0938157	0.161229	0.135602	0.218586	0.150274	0.0800503	0.112494	0.107939	-0.185232	-0.363892	-0.199506						0.0294559	0.183294	0.0529125
-23.9714	0.22574	-0.0829519	0.158208	0.121617	0.225097	0.152053	0.075139	0.108416	0.112898	-0.207	-0.370887	-0.201158						0.026431	0.18576	0.0536243
-23.8731	0.220388	-0.0723484	0.158119	0.10786	0.230774	0.152047	0.0694988	0.105612	0.119375	-0.220134	-0.373255	-0.1969						0.0250862	0.1862	0.0537513
-23.7748	0.21764	-0.0628551	0.161754	0.0950053	0.235884	0.153005	0.0683232	0.104758	0.124201	-0.225603	-0.374133	-0.194075						0.0253253	0.186519	0.0538433
-23.6765	0.213015	-0.0573483	0.166637	0.0811313	0.242721	0.15041	0.0649898	0.101725	0.12754	-0.231376	-0.375194	-0.196409						0.0239868	0.187387	0.0540939
-23.5782	0.210085	-0.0535589	0.170111	0.0645553	0.249801	0.149603	0.0633794	0.100115	0.132702	-0.237909	-0.374339	-0.199061						0.022957	0.188541	0.0544271
-23.4799	0.205176	-0.0491901	0.172779	0.0474972	0.257193	0.150017	0.0638019	0.0996425	0.138252	-0.247973	-0.369925	-0.206945						0.0216939	0.190155	0.0548929
-23.3816	0.198916	-0.0442715	0.172901	0.0332313	0.261165	0.152185	0.0676305	0.0989759	0.143699	-0.253285	-0.362336	-0.213809						0.0212503	0.190318	0.05494
-23.2833	0.189099	-0.0353478	0.171763	0.0184608	0.263446	0.154671	0.0691924	0.0947852	0.145025	-0.25313	-0.354529	-0.219739						0.020308	0.188875	0.0545235
-23.185	0.177673	-0.0294363	0.171335	0.00684953	0.265524	0.153109	0.0690847	0.0918531	0.144255	-0.252297	-0.347816	-0.227466						0.0185558	0.187537	0.0541372
-23.0867	0.164225	-0.0242688	0.172321	-0.00118523	0.264878	0.15014	0.0632371	0.0876703	0.142612	-0.248879	-0.337305	-0.234952						0.0165412	0.184755	0.0533343
-22.9884	0.148708	-0.0208017	0.172145	-0.0107291	0.265139	0.143692	0.0535026	0.0860722	0.142025	-0.24715	-0.324812	-0.247005						0.0133989	0.182375	0.0526471
-22.8901	0.129042	-0.0182126	0.173831	-0.0206406	0.263291	0.141114	0.0455475	0.0820476	0.142647	-0.239321	-0.312162	-0.260387						0.0105664	0.179629	0.0518544
-22.7918	0.106599	-0.0168523	0.176338	-0.0329	0.262557	0.140367	0.0390989	0.0758306	0.141698	-0.232785	-0.296032	-0.274719						0.00743332	0.177119	0.0511298
-22.6935	0.0851723	-0.0160849	0.184313	-0.042858	0.259399	0.141078	0.0365786	0.0733705	0.142717	-0.220843	-0.276293	-0.286674						0.00665632	0.174251	0.050302
-22.5952	0.0627713	-0.0159314	0.192122	-0.0461702	0.255336	0.140509	0.0376638	0.0701106	0.142347	-0.204754	-0.257102	-0.296607						0.00669126	0.17084	0.0493173
-22.4969	0.0394454	-0.0183777	0.199863	-0.0464529	0.248734	0.139224	0.0350232	0.0656389	0.140796	-0.187984	-0.241039	-0.307593						0.00560665	0.167899	0.0484683
-22.3986	0.0148929	-0.0254753	0.20879	-0.0475814	0.244298	0.135091	0.0309494	0.062888	0.136715	-0.170501	-0.224204	-0.318649						0.00393442	0.165568	0.0477953
-22.3003	-0.00743703	-0.0328682	0.217802	-0.0481903	0.239209	0.126965	0.0305428	0.0642276	0.128264	-0.151801	-0.203901	-0.329727						0.0027571	0.163042	0.0470663
-22.202	-0.0273426	-0.0391011	0.228941	-0.0483695	0.233629	0.121073	0.0301557	0.0687964	0.116008	-0.130057	-0.182679	-0.336084						0.00291411	0.16034	0.0462862
-22.1037	-0.0451736	-0.0464981	0.237474	-0.0492518	0.224988	0.118555	0.0278749	0.0713119	0.104745	-0.111537	-0.167415	-0.332566						0.00270885	0.156927	0.0453008
-22.0053	-0.0591822	-0.0528565	0.247669	-0.0466066	0.215197	0.116167	0.0296344	0.0715605	0.0899563	-0.100673	-0.158416	-0.325027						0.00228524	0.153979	0.0444499
-21.907	-0.0706231	-0.0577782	0.252492	-0.0445042	0.204777	0.112791	0.0325035	0.0723312	0.0734729	-0.0821106	-0.152129	-0.318094						0.00192729	0.150395	0.0434154
-21.8087	-0.0803133	-0.06122	0.250057	-0.0419302	0.194041	0.108879	0.0326788	0.0710984	0.0578684	-0.067051	-0.14752	-0.313792						0.000233023	0.146682	0.0423433
-21.7104	-0.0913805	-0.0642181	0.244981	-0.0371063	0.184603	0.103057	0.0338989	0.0693597	0.0441823	-0.058277	-0.139565	-0.309794						-0.0016882	0.142972	0.0412723
-21.6121	-0.0996619	-0.0660011	0.236307	-0.0318411	0.174404	0.100487	0.0399656	0.0693267	0.0345997	-0.0428112	-0.131004	-0.300902						-0.00142757	0.138073	0.0398583
-21.5138	-0.108439	-0.0699939	0.226765	-0.0258263	0.162222	0.0939038	0.0476454	0.0667511	0.0244747	-0.0267849	-0.123764	-0.286943						-0.00166583	0.132144	0.0381467
-21.4155	-0.113497	-0.074046	0.216571	-0.018941	0.151749	0.0867654	0.0524383	0.0598036	0.0122982	-0.00537488	-0.11536	-0.273181						-0.00173123	0.126025	0.0363803
-21.3172	-0.11751	-0.0817341	0.206013	-0.014107	0.143321	0.0795577	0.0526373	0.0538659	0.00093507	0.0109278	-0.10617	-0.259946						-0.00268411	0.120606	0.0348159
-21.2189	-0.119491	-0.0945417	0.191792	-0.00906898	0.134772	0.0756573	0.0537566	0.0518163	-0.00867467	0.0220326	-0.0960913	-0.24237						-0.00336755	0.114726	0.0331187
-21.1206	-0.119995	-0.105199	0.175418	-0.0062163	0.126352	0.0716581	0.0599582	0.0480543	-0.0156133	0.0381118	-0.0839166	-0.22257						-0.00282988	0.108574	0.0313426
-21.0223	-0.123484	-0.113309	0.155381	-0.00972724	0.121058	0.0698919	0.0721804	0.0437233	-0.0145946	0.0487842	-0.0727851	-0.20113						-0.00200089	0.10299	0.0297306
-20.924	-0.124091	-0.119669	0.138414	-0.0113579	0.11578	0.0674336	0.0846009	0.0375607	-0.0111701	0.0601719	-0.0609469	-0.175468						0.000104884	0.0973722	0.0281089
-20.8257	-0.122769	-0.126499	0.119218	-0.0115419	0.112097	0.060744	0.0948791	0.033857	-0.00710198	0.0679655	-0.048398	-0.146636						0.00215123	0.0914162	0.0263896
-20.7274	-0.121144	-0.132977	0.098788	-0.0099518	0.108014	0.0545698	0.103355	0.0316365	-0.00494724	0.0753808	-0.0395097	-0.116186						0.00391905	0.0861817	0.0248785
-20.6291	-0.119098	-0.139733	0.0727283	-0.00794306	0.10499	0.047017	0.111358	0.0296353	-0.00099893	0.0769658	-0.0319773	-0.0864954						0.00470404	0.0815158	0.0235316
-20.5308	-0.115837	-0.147565	0.0481894	-0.0101422	0.104381	0.0395824	0.11788	0.0273027	0.00432989	0.0716438	-0.0242576	-0.0560218						0.00495708	0.0781588	0.0225625
-20.4325	-0.112137	-0.151403	0.0247324	-0.0137612	0.10978	0.0324339	0.123743	0.0275486	0.00986476	0.0673771	-0.015733	-0.0253984						0.0064207	0.0766531	0.0221278
-20.3342	-0.107275	-0.152075	0.000964633	-0.0162494	0.113045	0.0274804	0.130836	0.0303675	0.016448	0.0624395	-0.0101143	0.00668724						0.00854619	0.0763292	0.0220344
-20.2359	-0.105629	-0.150673	-0.0215414	-0.0180017	0.11339	0.0273836	0.137287	0.0326897	0.0212072	0.0535472	-0.00537674	0.0379855						0.0101889	0.0773059	0.0223163
-20.1376	-0.109055	-0.149879	-0.0455554	-0.0188564	0.11504	0.025395	0.145672	0.0351299	0.0309606	0.0467235	-0.00453593	0.0665355						0.0114645	0.0812062	0.0234422
-20.0393	-0.11458	-0.147944	-0.0677367	-0.0190369	0.117994	0.0199303	0.159127	0.0396652	0.0384385	0.0404406	0.000869418	0.0938327						0.0134166	0.0870534	0.0251302
-19.941	-0.121906	-0.146709	-0.0889061	-0.0217962	0.122501	0.0147558	0.168692	0.0475038	0.0484582	0.0393258	0.0133629	0.119412						0.0162245	0.0939305	0.0271154
-19.8427	-0.128439	-0.145431	-0.10562	-0.0250278	0.128226	0.0152863	0.175546	0.052233	0.0554483	0.0364349	0.030134	0.14716						0.0196625	0.10082	0.0291041
-19.7444	-0.134596	-0.144296	-0.116369	-0.0283692	0.134103	0.0174405	0.183584	0.0579309	0.06179	0.0380838	0.0461013	0.176869						0.024356	0.108085	0.0312015
-19.6461	-0.140288	-0.143297	-0.123573	-0.0335139	0.137981	0.0178769	0.187582	0.063874	0.0652373	0.0452603	0.0584364	0.205169						0.0283954	0.114518	0.0330584
-19.5478	-0.146428	-0.140488	-0.127507	-0.0370364	0.141363	0.0183478	0.189041	0.0700283	0.0639004	0.0455769	0.0706432	0.228206						0.031304	0.119456	0.0344841
-19.4494	-0.154502	-0.134435	-0.129419	-0.0373397	0.14786	0.021992	0.189986	0.0776741	0.0643191	0.0469671	0.0798665	0.244771						0.0348117	0.123374	0.035615
-19.3511	-0.164873	-0.128567	-0.129811	-0.0385535	0.154558	0.0246331	0.192533	0.0891101	0.0670004	0.0427644	0.0882836	0.264129						0.0384339	0.128356	0.0370533
-19.2528	-0.178264	-0.118478	-0.12894	-0.039403	0.161937	0.028972	0.196882	0.098111	0.0719882	0.0370315	0.0950786	0.28248						0.0422829	0.133348	0.0384941
-19.1545	-0.192071	-0.105598	-0.121353	-0.0392189	0.170091	0.030656	0.202167	0.104334	0.076611	0.030813	0.0990346	0.296351						0.0459847	0.136934	0.0395294
-19.0562	-0.207505	-0.0942363	-0.112448	-0.0365095	0.177925	0.0343282	0.20419	0.111415	0.079704	0.0164409	0.100339	0.31027						0.0486594	0.140655	0.0406035
-18.9579	-0.219015	-0.0858779	-0.10171	-0.030194	0.184081	0.0369995	0.203142	0.121522	0.0788047	0.00458536	0.0987766	0.321075						0.0510157	0.143101	0.0413097
-18.8596	-0.232759	-0.0776134	-0.0947734	-0.0237076	0.191729	0.0425254	0.201486	0.131101	0.0801018	-0.0128835	0.0971641	0.325566						0.052328	0.145847	0.0421023
-18.7613	-0.247521	-0.0681747	-0.0882206	-0.0168454	0.197575	0.0512475	0.201262	0.139383	0.0807782	-0.0285793	0.0935663	0.327404						0.0534895	0.148474	0.0428607
-18.663	-0.259854	-0.0574481	-0.0804918	-0.0126531	0.205997	0.0574791	0.2025	0.146663	0.0816097	-0.0397142	0.0925678	0.322932						0.0549657	0.150154	0.0433457
-18.5647	-0.271657	-0.0465999	-0.069444	-0.0114933	0.213231	0.065826	0.198505	0.152726	0.0818859	-0.0466758	0.09426	0.319942						0.0567088	0.151381	0.0436999
-18.4664	-0.281581	-0.0341798	-0.0602571	-0.0104318	0.215463	0.0729669	0.192461	0.1575	0.0840812	-0.0444995	0.0971188	0.316789						0.0587859	0.151426	0.043713
-18.3681	-0.289916	-0.0249467	-0.053064	-0.0110881	0.213418	0.0798255	0.191951	0.161762	0.0822235	-0.0440538	0.098835	0.314662						0.0599673	0.151897	0.043849
-18.2698	-0.298434	-0.0171289	-0.0480546	-0.0130309	0.21102	0.0867732	0.190202	0.160486	0.0825316	-0.0437418	0.100999	0.309619						0.0601034	0.152005	0.0438802
-18.1715	-0.303005	-0.00906612	-0.0459455	-0.0176218	0.211124	0.088938	0.18576	0.157641	0.0840281	-0.042461	0.104559	0.304161						0.0598425	0.151518	0.0437395
-18.0732	-0.30197	0.000142267	-0.0428294	-0.0234459	0.20712	0.0945215	0.180744	0.156646	0.0818213	-0.0434006	0.111801	0.298854						0.0600003	0.149945	0.0432853
-17.9749	-0.298782	0.00966523	-0.0386706	-0.0293801	0.203682	0.100274	0.172095	0.154789	0.0829772	-0.0430365	0.11643	0.289727						0.0599809	0.147168	0.0424839
-17.8766	-0.294572	0.0194461	-0.0361106	-0.0349794	0.199131	0.103718	0.163999	0.152648	0.0827751	-0.0486348	0.115572	0.2784						0.0584493	0.144156	0.0416142
-17.7783	-0.291073	0.0292178	-0.0375642	-0.0415991	0.192776	0.102097	0.16046	0.153553	0.081718	-0.0596716	0.110469	0.266569						0.0555794	0.142028	0.041
-17.68	-0.288928	0.0362167	-0.0424085	-0.0483773	0.186269	0.101461	0.156582	0.152913	0.0845253	-0.077451	0.105266	0.251258						0.0514439	0.140659	0.0406046
-17.5817	-0.286476	0.0416719	-0.0532157	-0.0520421	0.183169	0.103535	0.155426	0.150698	0.086139	-0.0995277	0.098943	0.238497						0.0472348	0.140744	0.0406292
-17.4834	-0.285339	0.0420895	-0.0664115	-0.059411	0.181821	0.107104	0.152703	0.145417	0.0871415	-0.117664	0.0912278	0.230152						0.0424025	0.141798	0.0409335
-17.3851	-0.282121	0.0414263	-0.0810474	-0.0721803	0.177763	0.111849	0.147957	0.1406	0.0842505	-0.13639	0.0862732	0.22269						0.0367559	0.142997	0.0412798
-17.2868	-0.277333	0.0392853	-0.0968017	-0.0824373	0.170222	0.119995	0.14233	0.134448	0.0833152	-0.151435	0.0801489	0.214883						0.031385	0.143464	0.0414145
-17.1885	-0.266772	0.0349181	-0.1097	-0.0935664	0.160818	0.125587	0.13869	0.130409	0.0775851	-0.165659	0.0741717	0.206931						0.0261177	0.142785	0.0412184
-17.0902	-0.256569	0.028484	-0.12838	-0.106693	0.151501	0.131817	0.134412	0.125381	0.0721699	-0.179729	0.0696664	0.197625						0.0199738	0.14296	0.0412691
-16.9918	-0.241655	0.0216566	-0.146436	-0.120732	0.142339	0.136702	0.129098	0.119729	0.0682769	-0.185645	0.0664276	0.184788						0.0145457	0.141416	0.0408233
-16.8935	-0.225282	0.0165651	-0.162635	-0.133805	0.134348	0.1396	0.123117	0.111863	0.0603807	-0.19121	0.0675432	0.170872						0.00927969	0.1395	0.0402701
-16.7952	-0.207132	0.00797291	-0.177426	-0.147273	0.124334	0.141384	0.119831	0.10379	0.0462745	-0.194418	0.0685944	0.161794						0.00397714	0.137644	0.0397343
-16.6969	-0.18561	-0.0035607	-0.189399	-0.162432	0.11619	0.141663	0.116747	0.0965223	0.0329876	-0.195081	0.0690926	0.152287						-0.000882769	0.135504	0.0391166
-16.5986	-0.16371	-0.0163189	-0.199034	-0.176703	0.105535	0.145077	0.11257	0.0914603	0.0226819	-0.201767	0.0709384	0.148388						-0.00507358	0.135122	0.0390063
-16.5003	-0.141979	-0.0313967	-0.210378	-0.184808	0.0961167	0.145299	0.111945	0.0852925	0.0111395	-0.212462	0.0724744	0.14481						-0.00949558	0.135437	0.0390973
-16.402	-0.12134	-0.0478392	-0.219684	-0.1905	0.0902102	0.146887	0.112091	0.082853	-0.00494665	-0.227473	0.0720633	0.138085						-0.0141328	0.136729	0.0394703
-16.3037	-0.102255	-0.0628627	-0.227796	-0.194672	0.0867638	0.152127	0.106643	0.0792021	-0.0203512	-0.246206	0.0750779	0.130204						-0.0186771	0.139029	0.0401341
-16.2054	-0.0835678	-0.0790619	-0.231214	-0.1961	0.0846952	0.155126	0.102829	0.0823153	-0.0365852	-0.264282	0.0816805	0.122386						-0.0218148	0.141674	0.0408979
-16.1071	-0.0654103	-0.0971178	-0.230426	-0.195699	0.0835333	0.16042	0.101244	0.087992	-0.0519326	-0.280331	0.0828811	0.113758						-0.0242573	0.144292	0.0416535
-16.0088	-0.0492647	-0.11866	-0.229555	-0.193215	0.0860891	0.164451	0.0980122	0.088085	-0.0634626	-0.299945	0.0827925	0.103849						-0.0275685	0.147442	0.0425628
-15.9105	-0.0318424	-0.140261	-0.227437	-0.189723	0.089248	0.171538	0.0954026	0.08508	-0.0728844	-0.321399	0.0834002	0.0977303						-0.0300956	0.151764	0.0438105
-15.8122	-0.0150282	-0.163226	-0.224213	-0.182593	0.0915655	0.181163	0.0938966	0.0798308	-0.0739413	-0.338101	0.0849341	0.0948801						-0.0309027	0.155834	0.0449853
-15.7139	0.00134866	-0.187232	-0.219444	-0.172479	0.096266	0.188675	0.0904215	0.0742341	-0.0710957	-0.348489	0.0912168	0.0927466						-0.0303193	0.15914	0.0459396
-15.6156	0.0189404	-0.21023	-0.212212	-0.163993	0.102175	0.195391	0.0867085	0.0718863	-0.0720876	-0.355393	0.098868	0.0943766						-0.0287975	0.162793	0.0469942
-15.5173	0.0371271	-0.229024	-0.201445	-0.15978	0.102187	0.202039	0.0809462	0.0713973	-0.0689087	-0.35793	0.109857	0.092918						-0.0267181	0.16529	0.0477152
-15.419	0.0555338	-0.242237	-0.187114	-0.153694	0.0996174	0.204633	0.0798887	0.0739851	-0.0622617	-0.358283	0.121807	0.0892603						-0.0232387	0.166487	0.0480608
-15.3207	0.0726787	-0.255451	-0.171588	-0.145394	0.0982839	0.204826	0.0764622	0.073109	-0.0506056	-0.360379	0.134896	0.0880005						-0.0195968	0.167752	0.0484259
-15.2224	0.0888322	-0.264851	-0.155394	-0.13995	0.099324	0.200343	0.0725349	0.0725434	-0.0426139	-0.363721	0.146561	0.0858928						-0.0167083	0.168798	0.0487278
-15.1241	0.100444	-0.273313	-0.142775	-0.137181	0.0989372	0.196486	0.0701921	0.0697519	-0.0369486	-0.365706	0.156127	0.0814134						-0.0152143	0.169684	0.0489836
-15.0258	0.11259	-0.27895	-0.12659	-0.132532	0.0979307	0.189879	0.06853	0.0672399	-0.0320322	-0.367925	0.165725	0.0791222						-0.0130844	0.170051	0.0490894
-14.9275	0.120806	-0.280881	-0.10989	-0.128448	0.098602	0.184487	0.0674308	0.0650312	-0.0265388	-0.37469	0.17483	0.0816542						-0.0106339	0.171165	0.0494111
-14.8292	0.125076	-0.282693	-0.0961075	-0.124939	0.097961	0.182532	0.0663872	0.0642994	-0.0194558	-0.380281	0.180502	0.0862086						-0.00837581	0.172246	0.0497232
-14.7309	0.127131	-0.28054	-0.0795931	-0.121565	0.0977898	0.17985	0.0631194	0.0660262	-0.0113498	-0.382697	0.182304	0.0902408						-0.00577358	0.171706	0.0495672
-14.6326	0.127849	-0.270674	-0.0649146	-0.11778	0.0951327	0.177188	0.0565393	0.066299	-0.00408011	-0.387008	0.181749	0.0940631						-0.0038031	0.170106	0.0491054
-14.5342	0.125843	-0.25886	-0.0520737	-0.114185	0.0913667	0.172962	0.0472488	0.0646627	-0.000775033	-0.385672	0.177265	0.096927						-0.002941	0.166516	0.048069
-14.4359	0.121952	-0.243803	-0.0377408	-0.117001	0.0860129	0.173733	0.0380088	0.0635097	0.00437193	-0.379874	0.169109	0.0989111						-0.00190091	0.162056	0.0467816
-14.3376	0.117654	-0.227368	-0.0256159	-0.122327	0.0786654	0.171347	0.0266631	0.059722	0.00823472	-0.371973	0.162305	0.104787						-0.00149218	0.157245	0.0453927
-14.2393	0.115548	-0.212656	-0.0124871	-0.125374	0.0666992	0.163611	0.0188004	0.0564377	0.0146612	-0.359583	0.154057	0.110901						-0.000782074	0.151312	0.04368
-14.141	0.117397	-0.198535	-0.00105308	-0.13021	0.054065	0.160141	0.00999767	0.0479483	0.0233635	-0.349714	0.141135	0.115718						-0.000812152	0.146421	0.042268
-14.0427	0.118108	-0.182074	0.00667407	-0.134643	0.0380296	0.156829	0.00157327	0.0356868	0.0325421	-0.338974	0.131913	0.123848						-0.000873894	0.141799	0.0409339
-13.9444	0.119229	-0.163472	0.0117987	-0.141805	0.0192807	0.149553	-0.00793665	0.0271377	0.037005	-0.319147	0.121683	0.133132						-0.00112841	0.135543	0.039128
-13.8461	0.118227	-0.145559	0.0156248	-0.150113	-0.00308737	0.136532	-0.0179927	0.0239831	0.0313035	-0.296407	0.109842	0.136869						-0.0033981	0.128124	0.0369862
-13.7478	0.117624	-0.125407	0.0186298	-0.162639	-0.024986	0.122988	-0.0311787	0.0233992	0.0142576	-0.274054	0.0981525	0.141474						-0.00681173	0.121803	0.0351615
-13.6495	0.116963	-0.105325	0.0233715	-0.175811	-0.0482512	0.114718	-0.045773	0.0224172	-0.0028425	-0.249932	0.0808876	0.141755						-0.0106518	0.116213	0.0335478
-13.5512	0.117778	-0.0827511	0.0274011	-0.184032	-0.072294	0.105431	-0.0611973	0.0200399	-0.0230495	-0.225262	0.0597425	0.135175						-0.0152515	0.11036	0.0318581
-13.4529	0.11781	-0.064687	0.0332166	-0.190162	-0.0929684	0.094307	-0.0761046	0.0182112	-0.0450054	-0.204102	0.0340478	0.132784						-0.020221	0.106676	0.0307946
-13.3546	0.118522	-0.0493083	0.038984	-0.198652	-0.112891	0.0847198	-0.0946691	0.0154626	-0.0694791	-0.184445	0.00770118	0.131603						-0.0260376	0.105938	0.0305817
-13.2563	0.121555	-0.0331807	0.0437866	-0.207232	-0.133103	0.0779574	-0.110092	0.0173763	-0.0962437	-0.164812	-0.0221425	0.130259						-0.0313226	0.107651	0.0310762
-13.158	0.125288	-0.0209909	0.0485402	-0.213164	-0.154118	0.0751634	-0.123652	0.0192181	-0.119053	-0.143885	-0.0521804	0.13115						-0.0356404	0.111262	0.0321186
-13.0597	0.13105	-0.0109057	0.0553287	-0.214642	-0.171016	0.0732751	-0.13875	0.0241163	-0.136582	-0.117968	-0.0804732	0.137351						-0.0374345	0.116179	0.0335379
-12.9614	0.135503	-0.00366313	0.0613707	-0.216601	-0.187918	0.0754184	-0.154095	0.0318318	-0.153097	-0.0881028	-0.107041	0.14201						-0.0386987	0.122362	0.035323
-12.8631	0.141231	0.00161544	0.0662834	-0.217892	-0.207744	0.0760184	-0.166614	0.0402402	-0.170528	-0.0563619	-0.136014	0.143824						-0.0404952	0.129711	0.0374443
-12.7648	0.148949	0.0069246	0.0741647	-0.220071	-0.226496	0.0744452	-0.175479	0.0465445	-0.184031	-0.0256244	-0.164157	0.143696						-0.0417612	0.137586	0.0397177
-12.6665	0.157547	0.0125116	0.0804873	-0.220694	-0.245152	0.0749986	-0.183485	0.0511319	-0.190506	0.0030873	-0.188353	0.14005						-0.0423647	0.14492	0.0418349
-12.5682	0.165001	0.0104308	0.0883435	-0.221226	-0.262034	0.0743536	-0.186026	0.0567313	-0.198299	0.0292888	-0.211516	0.139216						-0.042978	0.152269	0.0439562
-12.4699	0.172312	0.00474545	0.0945099	-0.218809	-0.277051	0.0716617	-0.182458	0.0653038	-0.204694	0.0531956	-0.230724	0.137014						-0.0429161	0.158273	0.0456896
-12.3716	0.180087	-0.0016055	0.100481	-0.213746	-0.28986	0.0646777	-0.181565	0.0727052	-0.211429	0.0746087	-0.247046	0.133314						-0.0432814	0.163622	0.0472335
-12.2733	0.184994	-0.00727542	0.108864	-0.205687	-0.301171	0.064261	-0.176312	0.0802223	-0.210791	0.0912653	-0.263721	0.127377						-0.0423312	0.167785	0.0484354
-12.175	0.188347	-0.0120738	0.115378	-0.20023	-0.308051	0.0639501	-0.171824	0.087584	-0.212015	0.11123	-0.283122	0.122281						-0.0415455	0.172464	0.049786
-12.0766	0.184344	-0.0130421	0.120436	-0.195069	-0.315044	0.0581263	-0.167816	0.0951349	-0.21933	0.13335	-0.303522	0.118608						-0.0419853	0.177361	0.0511996
-11.9783	0.179944	-0.0148171	0.127476	-0.189143	-0.319105	0.0505542	-0.164889	0.10692	-0.22745	0.149901	-0.324914	0.113552						-0.0426642	0.182221	0.0526026
-11.88	0.174802	-0.015395	0.135753	-0.18331	-0.320686	0.0454914	-0.158049	0.1142	-0.231802	0.158815	-0.344387	0.10824						-0.0430272	0.185475	0.053542
-11.7817	0.167909	-0.0153837	0.141882	-0.177074	-0.318268	0.0454073	-0.149967	0.116198	-0.226709	0.163247	-0.361537	0.106185						-0.0423424	0.186588	0.0538633
-11.6834	0.161961	-0.0159727	0.145876	-0.168301	-0.313911	0.0459917	-0.138853	0.117965	-0.214725	0.166308	-0.377031	0.0994554						-0.0409364	0.18611	0.0537253
-11.5851	0.158343	-0.0132712	0.148481	-0.162135	-0.308947	0.0442236	-0.126016	0.1168	-0.200478	0.163228	-0.388377	0.0955029						-0.039387	0.184546	0.0532738
-11.4868	0.150271	-0.0143024	0.152039	-0.159171	-0.305984	0.0419585	-0.112846	0.113709	-0.179625	0.160794	-0.396283	0.10042						-0.0374183	0.182741	0.0527527
-11.3885	0.142834	-0.0134037	0.152964	-0.153968	-0.301845	0.0421419	-0.100695	0.10806	-0.155391	0.156645	-0.398662	0.103637						-0.0348069	0.179399	0.0517879
-11.2902	0.134162	-0.0111514	0.151747	-0.146339	-0.296553	0.0412513	-0.0880727	0.1014	-0.124484	0.148221	-0.398905	0.106153						-0.0318809	0.174622	0.050409
-11.1919	0.123277	-0.00956496	0.151611	-0.138074	-0.290085	0.0377694	-0.0715409	0.0932704	-0.0968751	0.142582	-0.396427	0.107124						-0.0289111	0.16957	0.0489505
-11.0936	0.110935	-0.00558603	0.15183	-0.130848	-0.281711	0.0334588	-0.058565	0.0843307	-0.0695278	0.136015	-0.391746	0.10511						-0.0263587	0.164074	0.0473641
-10.9953	0.0990886	0.000810078	0.153475	-0.125485	-0.274108	0.0269473	-0.0493595	0.0736099	-0.0429753	0.125515	-0.3858	0.0987304						-0.0249626	0.158521	0.0457612
-10.897	0.0887802	0.00886996	0.154459	-0.119043	-0.265365	0.0179852	-0.0397662	0.059041	-0.0174998	0.110613	-0.381636	0.0950996						-0.0240385	0.153323	0.0442606
-10.7987	0.075055	0.0159923	0.154524	-0.110524	-0.256342	0.0112676	-0.0320045	0.0434919	0.0111044	0.0962035	-0.374049	0.0930205						-0.0226883	0.147903	0.0426958
-10.7004	0.0599402	0.0205537	0.152039	-0.102189	-0.247578	0.00390548	-0.0265603	0.0288236	0.0335064	0.0801275	-0.366767	0.0938496						-0.022529	0.142945	0.0412646
-10.6021	0.0451265	0.0225222	0.147742	-0.0958305	-0.239938	-0.00648127	-0.021536	0.0131496	0.0497988	0.0594715	-0.359285	0.0961598						-0.0240917	0.138199	0.0398947
-10.5038	0.0313021	0.0274444	0.140146	-0.0870349	-0.231235	-0.0146401	-0.0226708	-0.000934147	0.0690537	0.0387867	-0.34667	0.0981295						-0.0248603	0.132858	0.0383527
-10.4055	0.019119	0.0343081	0.133746	-0.0797043	-0.221601	-0.0192247	-0.0264541	-0.0193639	0.0889331	0.0190914	-0.336321	0.100755						-0.0255597	0.12911	0.0372708
-10.3072	0.00688595	0.0391304	0.126096	-0.0721994	-0.213584	-0.0233267	-0.024453	-0.0359575	0.1102	-0.00167461	-0.328392	0.10392						-0.0261129	0.126935	0.0366429
-10.2089	-0.00287569	0.0440525	0.114833	-0.0658171	-0.205357	-0.0337963	-0.0261364	-0.0500238	0.129447	-0.0196323	-0.321569	0.108185						-0.0273908	0.125571	0.0362491
-10.1106	-0.0124181	0.0509631	0.104573	-0.0580501	-0.198627	-0.0394104	-0.0266881	-0.0635747	0.149288	-0.0426447	-0.31469	0.11108						-0.0283499	0.125381	0.0361945
-10.0123	-0.0190274	0.0563586	0.0960384	-0.0485321	-0.192001	-0.0419709	-0.025872	-0.0736755	0.173924	-0.0662362	-0.302896	0.114746						-0.0274287	0.12595	0.0363588
-9.91396	-0.0266456	0.0597495	0.0886059	-0.0396713	-0.185436	-0.0402845	-0.0260441	-0.0863286	0.201511	-0.0824469	-0.290256	0.117422						-0.0258187	0.127569	0.036826
-9.81565	-0.0336787	0.061975	0.0843269	-0.027978	-0.17915	-0.0348141	-0.0273854	-0.0943089	0.229422	-0.100514	-0.27963	0.118901						-0.0235695	0.130455	0.0376591
-9.71735	-0.039346	0.063803	0.0836516	-0.0153639	-0.170027	-0.0338	-0.0292968	-0.0999346	0.253118	-0.116275	-0.267672	0.119378						-0.0209804	0.132902	0.0383655
-9.61905	-0.0460273	0.065126	0.085609	-0.00406576	-0.161616	-0.0348361	-0.0320992	-0.107799	0.273678	-0.132963	-0.257329	0.122856						-0.0191222	0.136379	0.0393693
-9.52074	-0.0552636	0.0628986	0.0884119	0.0109521	-0.154947	-0.0392615	-0.0359804	-0.112308	0.290552	-0.146283	-0.247577	0.127671						-0.0175946	0.139673	0.0403202
-9.42244	-0.0603428	0.0641272	0.0886833	0.0285248	-0.144534	-0.0428812	-0.037261	-0.113457	0.30364	-0.160296	-0.236726	0.127539						-0.0152487	0.141665	0.0408952
-9.32413	-0.065581	0.0654502	0.087989	0.0424784	-0.134608	-0.048234	-0.0359279	-0.112501	0.312535	-0.170492	-0.229369	0.125027						-0.0136029	0.142972	0.0412724
-9.22583	-0.0702636	0.0677082	0.0868132	0.0590038	-0.125751	-0.0543716	-0.0328723	-0.1118	0.313777	-0.175771	-0.221996	0.122384						-0.0119283	0.142827	0.0412305
-9.12753	-0.0720659	0.0697771	0.0851549	0.0772212	-0.118532	-0.0597968	-0.0332694	-0.113761	0.319345	-0.182812	-0.214498	0.119485						-0.0103127	0.144153	0.0416134
-9.02922	-0.0707851	0.07375	0.0817206	0.0945188	-0.111941	-0.0661696	-0.0315889	-0.117676	0.321921	-0.188732	-0.208527	0.117979						-0.0087942	0.145357	0.041961
-8.93092	-0.070955	0.078208	0.0739343	0.11336	-0.10725	-0.0725566	-0.0268166	-0.12185	0.32117	-0.193143	-0.204592	0.118716						-0.00764787	0.146488	0.0422875
-8.83261	-0.0727464	0.0810048	0.0660607	0.130739	-0.10283	-0.0794485	-0.0209704	-0.123256	0.321486	-0.197129	-0.198828	0.115012						-0.00674218	0.147269	0.0425128
-8.73431	-0.0709967	0.0846266	0.0586696	0.144326	-0.0952637	-0.0863922	-0.0149628	-0.125601	0.318703	-0.20789	-0.193829	0.106763						-0.0068206	0.147821	0.0426722
-8.63601	-0.0668671	0.0912833	0.0541484	0.15976	-0.088196	-0.0919912	-0.00863645	-0.126079	0.318959	-0.210694	-0.187965	0.0959909						-0.0050239	0.148279	0.0428045
-8.5377	-0.0619854	0.0989135	0.0505544	0.178012	-0.076987	-0.0971729	-0.00156478	-0.125866	0.32162	-0.20276	-0.183659	0.0863437						-0.00121264	0.14855	0.0428826
-8.4394	-0.0580567	0.104499	0.0503405	0.195598	-0.067387	-0.101396	0.00847723	-0.128146	0.321448	-0.192634	-0.180205	0.072326						0.002072	0.148461	0.0428571
-8.34109	-0.0548466	0.110524	0.050897	0.212547	-0.0591676	-0.105641	0.0200285	-0.128224	0.324815	-0.182806	-0.175042	0.0569958						0.00584007	0.149135	0.0430516
-8.24279	-0.0503126	0.119242	0.0539425	0.230732	-0.0489417	-0.109052	0.0274293	-0.126755	0.322591	-0.171533	-0.164063	0.0404545						0.0103112	0.14854	0.0428799
-8.14449	-0.0457218	0.125339	0.0594192	0.249493	-0.0371744	-0.10947	0.0383974	-0.127048	0.314252	-0.161808	-0.150533	0.0227613						0.0148256	0.147206	0.0424947
-8.04618	-0.042919	0.129841	0.0625061	0.267534	-0.024966	-0.113362	0.0473868	-0.126295	0.306032	-0.15478	-0.133306	0.00530159						0.0185812	0.146378	0.0422558
-7.94788	-0.0376939	0.132478	0.0641923	0.282699	-0.0121617	-0.116598	0.0559165	-0.129677	0.293882	-0.145238	-0.116518	-0.0159046						0.0212813	0.145072	0.0418788
-7.84957	-0.0296835	0.135585	0.0628253	0.295849	-0.00148345	-0.121084	0.0689197	-0.129768	0.281358	-0.143052	-0.100397	-0.0364059						0.0235551	0.144731	0.0417802
-7.75127	-0.0221887	0.137643	0.0585068	0.307296	0.0103273	-0.130973	0.0814863	-0.129648	0.26943	-0.130559	-0.0855997	-0.0554565						0.0258554	0.144343	0.0416683
-7.65297	-0.0101044	0.139055	0.0508635	0.318576	0.0159833	-0.136671	0.0951949	-0.12788	0.258869	-0.113734	-0.0736788	-0.0747935						0.0284733	0.14408	0.0415923
-7.55466	0.000933245	0.141071	0.042484	0.32932	0.021533	-0.138723	0.111018	-0.123454	0.253159	-0.0958895	-0.0608239	-0.0918305						0.0323997	0.14441	0.0416877
-7.45636	0.0131356	0.145325	0.0354358	0.337697	0.0305322	-0.135841	0.126558	-0.11686	0.24494	-0.0793581	-0.0494827	-0.110615						0.0367888	0.144448	0.0416984
-7.35805	0.02457	0.146659	0.0290327	0.342664	0.0380702	-0.129162	0.139907	-0.11268	0.234914	-0.0624857	-0.0380138	-0.129732						0.0403121	0.143945	0.0415532
-7.25975	0.0346172	0.148586	0.0224955	0.349876	0.0462283	-0.120518	0.151692	-0.106375	0.226148	-0.0481441	-0.0247008	-0.14833						0.044298	0.144253	0.0416423
-7.16145	0.0433181	0.148022	0.0170146	0.353926	0.0550772	-0.108679	0.161175	-0.0990478	0.221597	-0.0359058	-0.0169799	-0.168293						0.047602	0.144852	0.0418153
-7.06314	0.0476896	0.148237	0.0113181	0.355232	0.0638105	-0.0962437	0.168135	-0.0889527	0.216132	-0.0212741	-0.0100737	-0.188319						0.0504743	0.144983	0.0418531
-6.96484	0.0482066	0.144699	0.0100116	0.35618	0.0711324	-0.0821968	0.173546	-0.0741976	0.215456	-0.00997433	8.75164e-05	-0.21103						0.0534933	0.145597	0.0420302
-6.86653	0.0477321	0.139529	0.0106896	0.355839	0.0776033	-0.0650025	0.181276	-0.0578899	0.218835	-0.00344556	0.0135329	-0.233921						0.0570648	0.146819	0.0423829
-6.76823	0.0475102	0.137244	0.0112091	0.355977	0.0832492	-0.0476645	0.188258	-0.0423868	0.221283	0.00466698	0.0248343	-0.252419						0.0609801	0.148064	0.0427424
-6.66993	0.0448822	0.136039	0.0122523	0.355429	0.0859054	-0.031312	0.191539	-0.0243502	0.221041	0.019872	0.0370945	-0.267533						0.0650716	0.148333	0.0428201
-6.57162	0.040558	0.133934	0.0111547	0.353433	0.0890387	-0.0160546	0.195876	-0.00827751	0.21822	0.0263097	0.0489738	-0.28059						0.0677146	0.14879	0.042952
-6.47332	0.0340849	0.131778	0.0115217	0.348244	0.0879916	0.000463062	0.199683	0.00743929	0.211098	0.0263473	0.0611858	-0.294288						0.0687957	0.149001	0.043013
-6.37501	0.027262	0.131365	0.00923494	0.338552	0.086828	0.0134501	0.20639	0.0248295	0.202202	0.0264185	0.067929	-0.300873						0.0694656	0.147889	0.0426918
-6.27671	0.0218567	0.129719	0.00628457	0.325744	0.0852152	0.0230762	0.210759	0.0421652	0.188584	0.0273455	0.0696369	-0.303372						0.0689179	0.145386	0.0419692
-6.17841	0.0170944	0.123986	0.000998553	0.308091	0.0826442	0.0328066	0.21567	0.0576185	0.181664	0.0303802	0.066679	-0.305959						0.0676395	0.143005	0.0412821
-6.0801	0.0127289	0.119312	-0.00519092	0.287517	0.0789237	0.0420515	0.218284	0.0712599	0.179078	0.036199	0.0627062	-0.308927						0.0661619	0.14084	0.0406571
-5.9818	0.0124395	0.112954	-0.00623941	0.267373	0.0755875	0.0514535	0.218017	0.0814494	0.182061	0.0484812	0.0550199	-0.310044						0.0657127	0.138384	0.0399479
-5.88349	0.011375	0.107174	-0.00740761	0.247715	0.0735424	0.0579446	0.216735	0.0928561	0.187706	0.0574958	0.045237	-0.307824						0.0652124	0.135924	0.0392379
-5.78519	0.00791488	0.104988	-0.00860487	0.229679	0.0731939	0.0593273	0.209754	0.0962264	0.187381	0.0709165	0.0390333	-0.310131						0.0633065	0.134101	0.0387117
-5.68689	0.00392482	0.106131	-0.00955081	0.211051	0.0707665	0.0612575	0.201703	0.0980973	0.179839	0.0762718	0.0369864	-0.313028						0.0602874	0.131934	0.0380861
-5.58858	-0.00689177	0.108184	-0.00906715	0.190351	0.0711808	0.0613008	0.192998	0.0978662	0.171036	0.07412	0.0348996	-0.311962						0.0561679	0.128823	0.0371881
-5.49028	-0.0155389	0.10953	-0.00515081	0.172611	0.0717723	0.0580402	0.181089	0.0977556	0.156277	0.0721129	0.0360993	-0.314111						0.0517072	0.125975	0.0363659
-5.39197	-0.0241925	0.107887	-0.00298469	0.155865	0.0703746	0.0547405	0.170938	0.0922422	0.146592	0.0715383	0.038107	-0.316606						0.0470418	0.123811	0.0357411
-5.29367	-0.0328674	0.10742	0.00266859	0.137854	0.0675157	0.0455791	0.163159	0.0845199	0.137085	0.070329	0.0389535	-0.317414						0.0420669	0.121382	0.0350399
-5.19537	-0.041346	0.107671	0.0131078	0.119471	0.0621354	0.0295978	0.152965	0.0723805	0.127742	0.0708711	0.0398508	-0.316421						0.0365021	0.118386	0.0341752
-5.09706	-0.0473381	0.10889	0.0240565	0.10136	0.0558488	0.0139257	0.143058	0.0623795	0.113585	0.0689	0.0462112	-0.31307						0.0314838	0.114936	0.0331791
-4.99876	-0.0486686	0.108705	0.0365479	0.0823428	0.0514068	-0.00415235	0.137025	0.0507826	0.096387	0.0655158	0.053455	-0.308711						0.0267197	0.111614	0.0322201
-4.90045	-0.0490691	0.109298	0.0453403	0.0665714	0.0513448	-0.0253687	0.134021	0.0373771	0.071833	0.0645605	0.057138	-0.300957						0.0218408	0.108368	0.0312831
-4.80215	-0.0451402	0.109921	0.0542522	0.0529658	0.0541858	-0.0489478	0.125645	0.0242357	0.0483871	0.0657601	0.0574234	-0.293167						0.0171268	0.105659	0.030501
-4.70385	-0.0366526	0.106939	0.0648549	0.039879	0.0581567	-0.0718835	0.113803	0.0115333	0.0254103	0.0693482	0.0599612	-0.287301						0.0128374	0.104013	0.0300259
-4.60554	-0.0247736	0.10343	0.074476	0.0313263	0.0657787	-0.0943356	0.105647	-0.00261368	0.00492367	0.0733836	0.0629343	-0.277877						0.0101917	0.103107	0.0297645
-4.50724	-0.0134912	0.098183	0.0840573	0.0244237	0.0713822	-0.113412	0.0956415	-0.0185749	-0.00984314	0.0815859	0.067219	-0.270456						0.00805959	0.10351	0.0298809
-4.40893	-0.0010373	0.0918023	0.0934929	0.0171634	0.0793542	-0.134052	0.086825	-0.0336496	-0.0210156	0.0861264	0.0716338	-0.26448						0.00601362	0.105241	0.0303805
-4.31063	0.0125204	0.0860637	0.104346	0.0125627	0.0884578	-0.150633	0.073003	-0.0483842	-0.0254843	0.0860494	0.0817236	-0.263757						0.00470566	0.108332	0.0312727
-4.21233	0.0254088	0.0812429	0.115272	0.013735	0.0982453	-0.165202	0.0583459	-0.0610594	-0.0271963	0.0813541	0.0959675	-0.266579						0.00412791	0.11263	0.0325135
-4.11402	0.0380467	0.0809325	0.125459	0.018994	0.106463	-0.180546	0.044356	-0.0759228	-0.0334482	0.069742	0.108598	-0.265067						0.00313389	0.116791	0.0337145
-4.01572	0.0516642	0.0819823	0.137397	0.0258134	0.111077	-0.194956	0.0311512	-0.0881004	-0.0355129	0.0560112	0.121545	-0.261104						0.00308069	0.120846	0.0348853
-3.91741	0.0619312	0.0858279	0.14423	0.0308854	0.11383	-0.20958	0.0237395	-0.0983391	-0.0443354	0.0406184	0.137756	-0.259261						0.0022753	0.125771	0.0363069
-3.81911	0.0709361	0.0897092	0.151695	0.0385266	0.113487	-0.220809	0.017741	-0.105956	-0.0506736	0.0281863	0.155993	-0.255189						0.00280388	0.130216	0.0375903
-3.72081	0.0790947	0.0899098	0.162019	0.0452315	0.11409	-0.22669	0.0124172	-0.107627	-0.050276	0.0136894	0.168092	-0.244729						0.00460182	0.132094	0.0381323
-3.6225	0.0890594	0.0876037	0.174068	0.0513652	0.114899	-0.229641	0.00893424	-0.10866	-0.0407043	0.00265139	0.17881	-0.233241						0.00792883	0.133433	0.0385187
-3.5242	0.103412	0.083216	0.18461	0.059509	0.115543	-0.23246	0.00674756	-0.109085	-0.0307624	-0.000965573	0.192176	-0.224553						0.0122822	0.135728	0.0391814
-3.42589	0.113936	0.0785177	0.188891	0.0654684	0.113665	-0.233729	0.00523329	-0.115281	-0.0219686	-0.00483096	0.198158	-0.216316						0.0143121	0.136652	0.0394481
-3.32759	0.124678	0.0770834	0.189989	0.0669289	0.109373	-0.235964	0.00184498	-0.11892	-0.0148088	-0.0120386	0.201095	-0.203824						0.015453	0.136422	0.0393816
-3.22929	0.135747	0.0751111	0.18446	0.0714907	0.106308	-0.236313	-0.00340754	-0.118194	-0.0032929	-0.0183449	0.200558	-0.189364						0.0170632	0.134557	0.0388433
-3.13098	0.146515	0.0691801	0.172164	0.0755743	0.105083	-0.22786	-0.00406635	-0.1181	0.00918678	-0.0249644	0.197111	-0.174256						0.0187972	0.130453	0.0376587
-3.03268	0.156989	0.0621726	0.158514	0.0795942	0.106858	-0.221682	-0.00477658	-0.119287	0.0254773	-0.0279043	0.191347	-0.158105						0.0207665	0.126705	0.0365766
-2.93437	0.161819	0.0568487	0.144596	0.0851925	0.106298	-0.211626	-0.00931819	-0.119719	0.0439727	-0.035069	0.184062	-0.141141						0.0221597	0.122187	0.0352725
-2.83607	0.168244	0.050211	0.130863	0.0876217	0.0970885	-0.198108	-0.0151389	-0.119699	0.0678328	-0.0408787	0.178937	-0.126042						0.023411	0.117778	0.0339997
-2.73777	0.16932	0.0434224	0.116817	0.0862263	0.0856247	-0.181855	-0.0182858	-0.124089	0.0908002	-0.0447152	0.175659	-0.110389						0.0240446	0.113328	0.0327151
-2.63946	0.164554	0.0389949	0.101961	0.081792	0.0731869	-0.165028	-0.0180826	-0.12896	0.112001	-0.0516729	0.170532	-0.0948809						0.0236998	0.108701	0.0313793
-2.54116	0.156175	0.0317576	0.0902317	0.0756013	0.057616	-0.148379	-0.0176637	-0.13327	0.131663	-0.0639744	0.159384	-0.0843239						0.0212347	0.104561	0.0301842
-2.44285	0.14864	0.0259447	0.0790411	0.0687386	0.0459422	-0.133596	-0.0163957	-0.135262	0.143398	-0.0778829	0.14591	-0.072228						0.0185207	0.100533	0.0290213
-2.34455	0.142131	0.024134	0.0660458	0.0637463	0.0337695	-0.11696	-0.0158044	-0.137313	0.154073	-0.0837793	0.131223	-0.0602788						0.0167489	0.0963405	0.0278111
-2.24625	0.134551	0.0219058	0.0525079	0.0603537	0.0216653	-0.103937	-0.0101995	-0.138802	0.160992	-0.0828728	0.115487	-0.0495826						0.0151724	0.0919444	0.0265421
-2.14794	0.124699	0.0207276	0.0386296	0.0556204	0.0105543	-0.091846	-0.00289058	-0.145315	0.161174	-0.0788874	0.0979857	-0.0379295						0.0127102	0.0873399	0.0252129
-2.04964	0.114037	0.0176325	0.0280749	0.0511357	0.000185437	-0.0788308	0.0018262	-0.149504	0.159135	-0.065821	0.0835627	-0.0293916						0.0110035	0.0823294	0.0237664
-1.95133	0.102408	0.0131876	0.0161937	0.0464278	-0.00566752	-0.0655047	0.00857304	-0.158186	0.15017	-0.0492664	0.0671148	-0.0223994						0.0085876	0.077243	0.0222981
-1.85303	0.0914397	0.00815216	0.00531549	0.04394	-0.00870559	-0.0501127	0.0144866	-0.165207	0.140799	-0.0345667	0.0452831	-0.015002						0.00631855	0.072625	0.020965
-1.75473	0.0821025	0.00570486	-0.00386056	0.0381615	-0.00919432	-0.0358839	0.0193895	-0.173979	0.126148	-0.0211074	0.0204489	-0.0140628						0.00282227	0.0690051	0.0199201
-1.65642	0.0762595	0.00525717	-0.0143696	0.0346213	-0.0103984	-0.0231838	0.0291498	-0.183537	0.100949	-0.00351144	-0.00183703	-0.0173473						-0.000662398	0.0664151	0.0191724
-1.55812	0.069001	0.00405069	-0.0273146	0.0335204	-0.0103369	-0.0140204	0.0372617	-0.193753	0.0686574	0.00797434	-0.0260005	-0.0230173						-0.00616473	0.0654512	0.0188941
-1.45981	0.0617559	0.00677683	-0.0360577	0.0317285	-0.0122134	-0.00347437	0.0435917	-0.2039	0.0342864	0.0147817	-0.0520807	-0.0299163						-0.0120601	0.0664952	0.0191955
-1.36151	0.0592308	0.0108888	-0.0426722	0.0297692	-0.0113633	0.00461213	0.051903	-0.207442	0.00144007	0.0241545	-0.0766747	-0.0370071						-0.0160968	0.0688812	0.0198843
-1.26321	0.0564234	0.0145653	-0.0454767	0.0345892	-0.00644618	0.0137536	0.061188	-0.208918	-0.0312437	0.0351993	-0.0961883	-0.0505174						-0.0185893	0.0731176	0.0211072
-1.1649	0.0506308	0.0208645	-0.040761	0.0408373	-0.00177518	0.0244567	0.0725453	-0.211818	-0.0683732	0.0432048	-0.112177	-0.0678457						-0.0208509	0.0793569	0.0229084
-1.0666	0.0474977	0.0315055	-0.0302037	0.0466017	0.00270656	0.0299979	0.0823512	-0.209384	-0.112122	0.0553151	-0.128605	-0.0889827						-0.0227768	0.0874291	0.0252386
-0.968294	0.0453111	0.0425563	-0.0198696	0.0533142	0.0050571	0.0362792	0.0941664	-0.207508	-0.159401	0.0668234	-0.146062	-0.114604						-0.0253281	0.0987481	0.0285061
-0.86999	0.0467753	0.0516831	-0.0115552	0.0625644	0.0106421	0.0386021	0.109795	-0.203123	-0.206658	0.0810234	-0.166248	-0.142172						-0.0273893	0.112526	0.0324835
-0.771686	0.0487507	0.0629974	-0.00075285	0.0719405	0.0244497	0.0390457	0.126199	-0.19975	-0.255362	0.0916752	-0.187244	-0.168298						-0.0288625	0.127956	0.0369377
-0.673382	0.0549312	0.0744106	0.0100499	0.0850329	0.0396972	0.0355309	0.144601	-0.190211	-0.308113	0.101642	-0.21216	-0.194986						-0.0299644	0.145297	0.0419437
-0.575078	0.0632359	0.0864815	0.0199597	0.101859	0.0571138	0.0295732	0.162784	-0.179845	-0.358312	0.113117	-0.238834	-0.221072						-0.0303282	0.163628	0.0472354
-0.476774	0.0750382	0.102039	0.0272234	0.117868	0.0744769	0.0218882	0.1818	-0.168568	-0.405891	0.131576	-0.258662	-0.244456						-0.0288055	0.181874	0.0525024
-0.37847	0.0892626	0.120209	0.0333368	0.133497	0.0903469	0.0142057	0.19912	-0.15623	-0.446066	0.149553	-0.277364	-0.26731						-0.026453	0.198977	0.0574396
-0.280166	0.1038	0.132883	0.0397606	0.147468	0.105428	0.00808143	0.214346	-0.143045	-0.485543	0.163883	-0.297172	-0.284743						-0.0245711	0.214884	0.0620317
-0.181862	0.120393	0.143607	0.0463743	0.160729	0.118145	0.00592219	0.227344	-0.132525	-0.52599	0.177886	-0.321199	-0.297471						-0.0230655	0.230927	0.0666628
-0.0835584	0.138719	0.153915	0.0525682	0.170036	0.129767	0.00556828	0.241441	-0.118047	-0.559415	0.193228	-0.342868	-0.309419						-0.0203757	0.245341	0.0708239
0.0147456	0.15628	0.164061	0.0564649	0.175882	0.144097	0.00445631	0.260088	-0.10113	-0.587727	0.208262	-0.364938	-0.319848						-0.0170043	0.258993	0.0747648
0.11305	0.172369	0.173995	0.0608849	0.180913	0.157822	0.00120758	0.275906	-0.0773441	-0.616351	0.219127	-0.38616	-0.331083						-0.0140594	0.271984	0.0785151
0.211354	0.187137	0.184964	0.067536	0.1841	0.17007	-0.00489309	0.288315	-0.0552546	-0.641361	0.228518	-0.401922	-0.342432						-0.0112687	0.28338	0.0818049
0.309658	0.199871	0.190862	0.0716563	0.185982	0.180279	-0.0100742	0.302404	-0.0324199	-0.662215	0.237163	-0.413845	-0.348532						-0.00823916	0.292675	0.084488
0.407962	0.209368	0.194493	0.0741924	0.18587	0.187982	-0.016989	0.315404	-0.00596673	-0.673914	0.240697	-0.424051	-0.351136						-0.00533754	0.298848	0.0862701
0.506266	0.220504	0.200607	0.0774123	0.18553	0.194029	-0.0207968	0.328086	0.0231252	-0.6811	0.250617	-0.434113	-0.350216						-0.000526314	0.304596	0.0879292
0.60457	0.228742	0.204724	0.075061	0.185488	0.200451	-0.0245117	0.341172	0.0533451	-0.681953	0.259626	-0.445897	-0.347191						0.00408804	0.309021	0.0892068
0.702874	0.234907	0.206506	0.0734153	0.184414	0.206913	-0.0255321	0.353211	0.0802462	-0.677253	0.263095	-0.453379	-0.342722						0.00865174	0.311166	0.0898258
0.801178	0.240791	0.20424	0.0707114	0.179969	0.211429	-0.0291002	0.364914	0.101771	-0.672378	0.267698	-0.461941	-0.333029						0.0120896	0.312577	0.0902331
0.899482	0.249641	0.197939	0.0623652	0.171973	0.21725	-0.0340266	0.373286	0.121577	-0.662896	0.271895	-0.470928	-0.323926						0.0145125	0.312913	0.0903302
0.997786	0.256554	0.188014	0.051914	0.162875	0.222727	-0.0358558	0.38253	0.138497	-0.643959	0.269523	-0.47761	-0.313308						0.016825	0.31051	0.0896366
1.09609	0.262181	0.179659	0.0420439	0.150852	0.225913	-0.0364424	0.389862	0.153938	-0.621608	0.266671	-0.477619	-0.29944						0.0196675	0.306084	0.0883588
1.19439	0.267576	0.175567	0.0331303	0.135552	0.225309	-0.0342289	0.394424	0.164886	-0.595564	0.265329	-0.470438	-0.282984						0.0232133	0.299528	0.0864664
1.2927	0.271425	0.173921	0.0216514	0.119712	0.220549	-0.0321155	0.398027	0.176426	-0.567703	0.269991	-0.466814	-0.267251						0.026485	0.293548	0.0847401
1.391	0.273151	0.174302	0.00999533	0.0996384	0.214551	-0.0266996	0.400548	0.182407	-0.53462	0.272537	-0.455586	-0.255021						0.0296003	0.285431	0.0823969
1.48931	0.273442	0.172156	-0.00107706	0.0778565	0.205279	-0.0178236	0.402333	0.186842	-0.506678	0.269931	-0.443527	-0.241788						0.0314121	0.277283	0.0800448
1.58761	0.271799	0.169303	-0.011845	0.0539992	0.194557	-0.00535537	0.402788	0.188006	-0.482113	0.262226	-0.433228	-0.229382						0.0317296	0.269332	0.0777495
1.68591	0.269083	0.163876	-0.0223804	0.0266147	0.181596	0.00661826	0.405659	0.185923	-0.458299	0.255833	-0.423156	-0.220221						0.0309288	0.262073	0.0756539
1.78422	0.263349	0.162193	-0.0324364	0.00027714	0.168307	0.0159246	0.409977	0.180744	-0.435017	0.247656	-0.408009	-0.215508						0.029788	0.254768	0.0735453
1.88252	0.256548	0.16113	-0.0439356	-0.0264507	0.156996	0.0192331	0.41503	0.175268	-0.410098	0.237393	-0.388922	-0.212504						0.0283074	0.247274	0.0713819
1.98083	0.248627	0.15686	-0.0558192	-0.0495519	0.145822	0.018981	0.418469	0.169427	-0.386893	0.225589	-0.367519	-0.211775						0.026018	0.239758	0.0692123
2.07913	0.240225	0.150064	-0.0664153	-0.0689027	0.130936	0.0193398	0.420813	0.161389	-0.361291	0.204561	-0.342508	-0.215011						0.0227667	0.230892	0.0666527
2.17743	0.233293	0.143633	-0.0783168	-0.0848071	0.11469	0.0198069	0.424082	0.147164	-0.329809	0.183088	-0.315212	-0.218126						0.0199572	0.221338	0.0638947
2.27574	0.230595	0.133565	-0.0927995	-0.0991177	0.0995952	0.025067	0.429974	0.130328	-0.302486	0.165198	-0.286925	-0.217505						0.0179574	0.213388	0.0615998
2.37404	0.227109	0.128897	-0.106588	-0.107527	0.0845362	0.028352	0.434418	0.113374	-0.276996	0.1464	-0.25914	-0.216325						0.0163758	0.20606	0.0594845
2.47235	0.225097	0.125142	-0.11613	-0.116565	0.073075	0.0321856	0.435057	0.0895105	-0.253072	0.127542	-0.231732	-0.215696						0.0145345	0.19897	0.0574376
2.57065	0.220631	0.117729	-0.127839	-0.12821	0.0619302	0.0343848	0.4373	0.0601579	-0.231626	0.105677	-0.197391	-0.215358						0.0114489	0.192305	0.0555137
2.66895	0.217246	0.10987	-0.136168	-0.140858	0.0540342	0.0356065	0.439101	0.0287842	-0.216985	0.0878519	-0.158729	-0.214087						0.00880539	0.187166	0.0540302
2.76726	0.212958	0.104683	-0.143117	-0.151031	0.0433557	0.0369197	0.439696	0.00211178	-0.207624	0.0726063	-0.122583	-0.212369						0.00630059	0.183533	0.0529814
2.86556	0.208389	0.101638	-0.150864	-0.16051	0.0333983	0.0379691	0.443476	-0.0188495	-0.199704	0.0579076	-0.0860203	-0.214529						0.00435851	0.182184	0.052592
2.96387	0.20261	0.0996389	-0.15602	-0.170562	0.0214037	0.0388565	0.448905	-0.0386205	-0.195984	0.0491256	-0.0506107	-0.211875						0.00307223	0.182014	0.0525429
3.06217	0.199152	0.10163	-0.160448	-0.177953	0.00915546	0.0379316	0.452265	-0.0583275	-0.199153	0.0421828	-0.0144344	-0.206663						0.00211151	0.182842	0.052782
3.16047	0.192881	0.101867	-0.16279	-0.181853	0.000218519	0.0365664	0.457142	-0.0743737	-0.199808	0.0372141	0.0146369	-0.202943						0.00156315	0.183865	0.0530773
3.25878	0.185782	0.0962943	-0.16715	-0.183838	-0.00530597	0.0342726	0.463909	-0.0887658	-0.204895	0.0308648	0.0386185	-0.202115						-0.000193991	0.185987	0.0536898
3.35708	0.177597	0.0863791	-0.171048	-0.183074	-0.00940797	0.0335316	0.47086	-0.1046	-0.210964	0.0184504	0.0693531	-0.203753						-0.002223	0.18858	0.0544385
3.45539	0.168236	0.0721215	-0.174457	-0.178794	-0.0126224	0.0314856	0.473574	-0.117385	-0.221741	0.00687886	0.0978382	-0.199811						-0.00455645	0.190082	0.0548719
3.55369	0.161441	0.0609258	-0.178841	-0.174407	-0.0136577	0.0280453	0.476421	-0.127296	-0.222303	-0.000942355	0.128221	-0.195701						-0.00484122	0.191531	0.0552902
3.65199	0.155062	0.0462416	-0.184279	-0.166517	-0.0103431	0.0205937	0.478492	-0.134703	-0.21771	-0.00733956	0.157705	-0.192313						-0.00459246	0.192474	0.0555624
3.7503	0.145541	0.0319889	-0.190536	-0.154605	-0.00511239	0.0147412	0.47825	-0.138154	-0.216713	-0.0150873	0.18605	-0.18544						-0.0040897	0.192886	0.0556813
3.8486	0.138289	0.0166431	-0.1979	-0.142147	0.000584439	0.0123617	0.478121	-0.137498	-0.213837	-0.0191468	0.210808	-0.179579						-0.00277502	0.193459	0.0558469
3.94691	0.130044	0.00316795	-0.201279	-0.130673	0.00616127	0.0141228	0.476314	-0.13502	-0.210142	-0.0227518	0.235047	-0.174335						-0.000778713	0.193684	0.0559118
4.04521	0.124968	-0.00726089	-0.204303	-0.120205	0.0123323	0.0194912	0.472628	-0.134814	-0.207203	-0.02859	0.254542	-0.16738						0.00118378	0.193753	0.0559317
4.14351	0.121737	-0.0143624	-0.209766	-0.111025	0.0173786	0.0255817	0.465629	-0.134894	-0.208936	-0.0310093	0.265934	-0.157319						0.00241227	0.193075	0.0557358
4.24182	0.117836	-0.0214159	-0.212219	-0.106477	0.0213683	0.0336049	0.456881	-0.130631	-0.216937	-0.0290862	0.274461	-0.14481						0.00354797	0.191956	0.0554129
4.34012	0.108841	-0.0260538	-0.211266	-0.104658	0.0228702	0.0372384	0.445658	-0.120652	-0.221556	-0.0298323	0.279095	-0.138257						0.00345242	0.189304	0.0546474
4.43843	0.101497	-0.033812	-0.209387	-0.104858	0.0261931	0.0412936	0.435354	-0.111053	-0.227491	-0.0250273	0.28103	-0.131104						0.0035529	0.186845	0.0539375
4.53673	0.0947701	-0.0408924	-0.209803	-0.103016	0.0260643	0.0469948	0.426675	-0.0952293	-0.237437	-0.0148817	0.277289	-0.127146						0.00361559	0.184569	0.0532804
4.63503	0.0886719	-0.044298	-0.205868	-0.100181	0.024792	0.0554431	0.41694	-0.0767849	-0.244729	-0.00354062	0.266896	-0.126348						0.00424947	0.180866	0.0522116
4.73334	0.0817967	-0.0469587	-0.200783	-0.0966133	0.0199716	0.0643882	0.405115	-0.0581895	-0.248415	0.00472634	0.25284	-0.127374						0.00420869	0.176131	0.0508446
4.83164	0.0773053	-0.0532104	-0.196889	-0.0946517	0.0174611	0.0739108	0.39181	-0.0464169	-0.250336	0.0119733	0.238564	-0.129274						0.003354	0.171821	0.0496005
4.92995	0.0726748	-0.0595773	-0.191882	-0.0937926	0.013202	0.0859933	0.37426	-0.0371704	-0.252299	0.0222787	0.223307	-0.133467						0.00196057	0.167146	0.0482508
5.02825	0.0669378	-0.0634365	-0.188921	-0.0886762	0.00991816	0.0984406	0.355035	-0.0275298	-0.251946	0.0274024	0.209213	-0.140579						0.000488326	0.162382	0.0468755
5.12655	0.057345	-0.0703216	-0.188002	-0.0841805	0.00804557	0.112627	0.336554	-0.0182383	-0.244405	0.0336704	0.196603	-0.146301						-0.000550271	0.157569	0.0454863
5.22486	0.0525621	-0.0763559	-0.190156	-0.0810943	0.00552175	0.12357	0.316116	-0.0130028	-0.245128	0.0386457	0.186231	-0.148612						-0.00264198	0.154108	0.0444872
5.32316	0.0484801	-0.0795328	-0.190566	-0.0805223	0.0012873	0.134592	0.293241	-0.00362565	-0.244755	0.0412699	0.175098	-0.150901						-0.0046611	0.150104	0.0433312
5.42147	0.0463425	-0.0817553	-0.191489	-0.0802786	-0.00350788	0.144022	0.2706	0.0091817	-0.246209	0.0478117	0.157101	-0.14933						-0.00645933	0.145886	0.0421136
5.51977	0.046077	-0.080622	-0.190979	-0.0803884	-0.00804088	0.151662	0.251714	0.0219486	-0.247259	0.0606103	0.132901	-0.149475						-0.00765427	0.142179	0.0410436
5.61807	0.0437833	-0.0815071	-0.187414	-0.0787093	-0.0124557	0.161015	0.231491	0.0331101	-0.253391	0.0738233	0.109968	-0.152195						-0.00937346	0.139792	0.0403546
5.71638	0.0400835	-0.0774704	-0.180968	-0.07838	-0.0200358	0.170661	0.210661	0.0451974	-0.262426	0.0868972	0.0851512	-0.155749						-0.0113648	0.13809	0.0398631
5.81468	0.037969	-0.0740351	-0.171271	-0.0777894	-0.0278421	0.176412	0.190864	0.0553998	-0.27148	0.0994311	0.0630092	-0.159845						-0.0132648	0.136839	0.039502
5.91299	0.035945	-0.070859	-0.160288	-0.0768368	-0.035266	0.176977	0.171759	0.0634354	-0.281413	0.106291	0.0433562	-0.159796						-0.0155579	0.135092	0.0389978
6.01129	0.0351951	-0.0687179	-0.153451	-0.0758331	-0.0440182	0.175946	0.152934	0.0721528	-0.294668	0.106238	0.0241828	-0.161418						-0.0192882	0.134487	0.0388229
6.10959	0.0309289	-0.0664374	-0.145956	-0.074668	-0.0526611	0.174489	0.137227	0.0824468	-0.308322	0.111481	0.00688497	-0.164125						-0.0223927	0.135264	0.0390473
6.2079	0.0247925	-0.0624798	-0.135852	-0.0733957	-0.0553506	0.170664	0.124824	0.0931143	-0.320247	0.120446	-0.00465579	-0.164382						-0.0235435	0.136094	0.039287
6.3062	0.0186774	-0.0582276	-0.129351	-0.0682368	-0.055396	0.164363	0.112654	0.100586	-0.325698	0.122976	-0.0151897	-0.166227						-0.0249226	0.135287	0.039054
6.40451	0.0169674	-0.0533377	-0.123695	-0.060474	-0.0527655	0.158877	0.103626	0.104166	-0.328947	0.127629	-0.024489	-0.165847						-0.0248576	0.134441	0.0388096
6.50281	0.016061	-0.0480048	-0.120608	-0.0540937	-0.0502087	0.155702	0.0921105	0.105128	-0.330919	0.125063	-0.0328004	-0.169772						-0.0260285	0.133308	0.0384827
6.60111	0.0136691	-0.0442362	-0.12067	-0.0480745	-0.0455208	0.152435	0.0790394	0.101083	-0.323127	0.114585	-0.0363109	-0.169531						-0.0272215	0.128937	0.0372209
6.69942	0.0133577	-0.0436031	-0.122258	-0.0414688	-0.0376805	0.145476	0.0678985	0.0981792	-0.317718	0.107404	-0.0421036	-0.167319						-0.0283196	0.125234	0.036152
6.79772	0.014287	-0.0439693	-0.125067	-0.0362144	-0.0278743	0.139478	0.063324	0.0958031	-0.311959	0.0982571	-0.0460241	-0.166279						-0.0288532	0.122222	0.0352825
6.89603	0.0137644	-0.0416718	-0.12629	-0.0310872	-0.0166027	0.130139	0.0624435	0.0999345	-0.303289	0.0927913	-0.0501516	-0.161776						-0.0276496	0.11904	0.0343639
6.99433	0.0143897	-0.0375003	-0.125837	-0.0267042	-0.00287817	0.118472	0.0603893	0.102064	-0.29165	0.0822378	-0.0542608	-0.152962						-0.0261866	0.114092	0.0329356
7.09263	0.0178756	-0.0332456	-0.123476	-0.0257277	0.0129071	0.109212	0.0604517	0.104015	-0.280983	0.0715492	-0.0578025	-0.144628						-0.0241544	0.110011	0.0317573
7.19094	0.0241679	-0.028304	-0.121092	-0.0263223	0.0278004	0.0956393	0.0596788	0.104984	-0.277493	0.060682	-0.0630402	-0.141224						-0.0237103	0.107665	0.0310802
7.28924	0.0251763	-0.0246112	-0.116727	-0.0282624	0.0417334	0.0838147	0.0629588	0.106283	-0.269318	0.0486658	-0.0662427	-0.144958						-0.0234572	0.105431	0.0304353
7.38755	0.0255209	-0.0228802	-0.112439	-0.0297953	0.0555773	0.0718004	0.0688652	0.101074	-0.262019	0.0431836	-0.0663141	-0.147883						-0.0229425	0.103432	0.0298581
7.48585	0.0268896	-0.021565	-0.106588	-0.0328936	0.069167	0.0602912	0.0752836	0.0932823	-0.25542	0.0359557	-0.0609952	-0.152052						-0.022387	0.101562	0.0293184
7.58415	0.0301052	-0.0210882	-0.100681	-0.0385945	0.0829898	0.0500768	0.0839336	0.0841798	-0.244799	0.0193361	-0.05333	-0.158112						-0.0221653	0.0994785	0.028717
7.68246	0.0341996	-0.0221842	-0.0976303	-0.0486991	0.0943556	0.0357896	0.0972657	0.0734521	-0.235563	0.00501069	-0.0470497	-0.162249						-0.0227751	0.0985027	0.0284353
7.78076	0.0392034	-0.0259832	-0.0940893	-0.0599369	0.107319	0.0245126	0.11352	0.0603889	-0.2251	-0.0103423	-0.0371235	-0.16328						-0.0225759	0.0983228	0.0283833
7.87907	0.0440423	-0.0303489	-0.0906984	-0.0748113	0.120897	0.0139159	0.129597	0.0461933	-0.209007	-0.023938	-0.0278418	-0.166893						-0.0224078	0.0988613	0.0285388
7.97737	0.0492289	-0.0349381	-0.0864806	-0.0912524	0.135341	0.00319181	0.144936	0.0309173	-0.19234	-0.0297451	-0.0187689	-0.172068						-0.0218315	0.100772	0.0290903
8.07567	0.052567	-0.0418026	-0.0799139	-0.106143	0.152432	-0.00891626	0.160484	0.011518	-0.173968	-0.0275319	-0.0137457	-0.172645						-0.0206387	0.102986	0.0297294
8.17398	0.0571637	-0.051386	-0.0705321	-0.122084	0.168279	-0.0223439	0.176599	-0.0097424	-0.153292	-0.0270842	-0.0114028	-0.170787						-0.0197178	0.105968	0.0305905
8.27228	0.0639902	-0.0652359	-0.0616029	-0.138307	0.179938	-0.0340497	0.191461	-0.0331613	-0.135143	-0.0267454	-0.0108759	-0.175173						-0.0204087	0.110812	0.0319888
8.37059	0.0719073	-0.0815036	-0.050601	-0.15394	0.191048	-0.0437868	0.208951	-0.0547995	-0.118565	-0.0223199	-0.0100516	-0.178334						-0.0201662	0.117165	0.0338226
8.46889	0.0788939	-0.101799	-0.0383417	-0.169447	0.200611	-0.0518675	0.22483	-0.0754123	-0.108277	-0.0173326	-0.00902151	-0.179731						-0.0205746	0.124254	0.0358691
8.56719	0.085303	-0.12236	-0.0235785	-0.185176	0.208611	-0.0620799	0.245422	-0.0936118	-0.0990059	-0.00803445	-0.00804202	-0.180176						-0.0202274	0.132585	0.0382741
8.6655	0.0932752	-0.140776	-0.00364187	-0.202484	0.216951	-0.0724595	0.269234	-0.110841	-0.094087	0.00747567	-0.00314149	-0.182124						-0.0185516	0.142764	0.0412125
8.7638	0.0999966	-0.159477	0.0169107	-0.218782	0.224622	-0.0809684	0.290198	-0.128105	-0.0862094	0.0202429	0.00873745	-0.182136						-0.0162476	0.152519	0.0440284
8.86211	0.109011	-0.178143	0.0367719	-0.230877	0.233658	-0.0938319	0.303855	-0.144504	-0.0821346	0.0360514	0.0196855	-0.179805						-0.0141886	0.161563	0.0466393
8.96041	0.117982	-0.197776	0.055646	-0.240028	0.241143	-0.103399	0.316428	-0.164488	-0.0785755	0.048627	0.0298536	-0.181119						-0.0129755	0.170778	0.0492994
9.05871	0.126537	-0.219143	0.0733681	-0.244448	0.248097	-0.112247	0.333342	-0.182001	-0.0769296	0.0616836	0.0385861	-0.181241						-0.0111997	0.180305	0.0520497
9.15702	0.133423	-0.243991	0.0923389	-0.246365	0.251111	-0.126531	0.346738	-0.19874	-0.0769695	0.0795853	0.0496902	-0.182016						-0.0101438	0.18973	0.0547703
9.25532	0.138615	-0.269918	0.115549	-0.245195	0.251677	-0.135586	0.360188	-0.212921	-0.0695167	0.0966142	0.0603868	-0.18014						-0.00752061	0.19831	0.0572472
9.35363	0.148518	-0.295398	0.139165	-0.241077	0.254448	-0.143304	0.368536	-0.224831	-0.0600997	0.112593	0.0675323	-0.169103						-0.00358509	0.205699	0.05938
9.45193	0.159623	-0.319801	0.164807	-0.233593	0.258105	-0.151929	0.375101	-0.233676	-0.0480873	0.126747	0.0751419	-0.156499						0.00132837	0.212717	0.061406
9.55023	0.167305	-0.3433	0.189856	-0.224987	0.261145	-0.159316	0.380704	-0.24256	-0.0316658	0.13954	0.0824999	-0.140895						0.00652725	0.21918	0.0632719
9.64854	0.173036	-0.366852	0.213473	-0.212296	0.26398	-0.165601	0.383031	-0.250946	-0.0190571	0.154708	0.0920209	-0.12176						0.0119781	0.225061	0.0649694
9.74684	0.179058	-0.388601	0.238502	-0.194657	0.268905	-0.168509	0.381254	-0.260035	-0.0078062	0.168281	0.0999996	-0.105094						0.017608	0.230439	0.0665222
9.84515	0.184843	-0.410267	0.259455	-0.172271	0.27342	-0.173786	0.376971	-0.271002	6.89893e-05	0.181278	0.106594	-0.0907016						0.0220501	0.235691	0.0680382
9.94345	0.18843	-0.433317	0.278555	-0.146463	0.276352	-0.174434	0.373138	-0.280627	0.00571047	0.193825	0.110102	-0.0751598						0.0263425	0.24051	0.0694292
10.0418	0.189904	-0.455602	0.296639	-0.119029	0.278488	-0.16956	0.367456	-0.289019	0.00751014	0.200558	0.112555	-0.060391						0.0299592	0.244351	0.070538
10.1401	0.194087	-0.472705	0.315384	-0.0913067	0.279286	-0.160657	0.36103	-0.290999	0.0127158	0.204108	0.119619	-0.0486106						0.0351626	0.246883	0.071269
10.2384	0.197543	-0.486531	0.329011	-0.0635373	0.280454	-0.151301	0.352135	-0.288262	0.0198807	0.20568	0.128283	-0.0384524						0.0404086	0.247942	0.0715746
10.3367	0.199429	-0.497743	0.341517	-0.0377384	0.282467	-0.141509	0.343768	-0.283547	0.0284005	0.202963	0.135419	-0.0216685						0.0459797	0.248228	0.0716572
10.435	0.201711	-0.502877	0.353188	-0.0136498	0.285677	-0.130882	0.332069	-0.27738	0.0348828	0.202381	0.145399	-0.00868444						0.0518196	0.247592	0.0714735
10.5333	0.202057	-0.504021	0.359728	0.00967308	0.288131	-0.122035	0.319613	-0.270078	0.0478727	0.201911	0.15676	0.00482177						0.0578695	0.245771	0.0709479
10.6316	0.202561	-0.504611	0.366984	0.0331338	0.292681	-0.11432	0.300929	-0.263253	0.0645294	0.198769	0.167394	0.0203548						0.0637627	0.243815	0.0703834
10.7299	0.202416	-0.505741	0.37096	0.0571361	0.297053	-0.107284	0.281277	-0.251907	0.0776257	0.193806	0.172438	0.036016						0.0686497	0.24118	0.0696225
10.8282	0.200556	-0.501154	0.374059	0.0800647	0.299508	-0.101513	0.262929	-0.240851	0.0888625	0.185725	0.173106	0.0478942						0.0724322	0.237443	0.068544
10.9265	0.195683	-0.495056	0.376592	0.0969624	0.300588	-0.0923986	0.246376	-0.231592	0.104198	0.178024	0.175955	0.0551507						0.0758736	0.233683	0.0674584
11.0248	0.191501	-0.487563	0.37747	0.108409	0.300005	-0.0852234	0.228456	-0.224021	0.116113	0.16752	0.182801	0.0625644						0.0781693	0.229823	0.066344
11.1231	0.186596	-0.481293	0.378685	0.114272	0.296998	-0.0762131	0.208211	-0.215243	0.13042	0.155085	0.190024	0.0701395						0.0798067	0.225883	0.0652069
11.2214	0.180927	-0.475424	0.376427	0.116385	0.295421	-0.0641374	0.193386	-0.208495	0.149081	0.140403	0.192184	0.0796752						0.0813193	0.222135	0.0641249
11.3197	0.176739	-0.465975	0.368927	0.113237	0.298974	-0.0546364	0.177573	-0.203808	0.162982	0.123646	0.193182	0.0877226						0.0815469	0.217908	0.0629047
11.418	0.170092	-0.455869	0.360698	0.106667	0.300094	-0.0440049	0.164114	-0.199535	0.175129	0.108465	0.196411	0.0899689						0.0810191	0.213562	0.0616501
11.5163	0.162797	-0.443755	0.350619	0.0953255	0.299035	-0.0316543	0.153274	-0.195893	0.185808	0.091361	0.196087	0.0920113						0.0795846	0.20847	0.0601801
11.6146	0.156589	-0.430925	0.339244	0.0820318	0.299387	-0.0208398	0.141597	-0.193293	0.195561	0.0747455	0.194328	0.0879437						0.0771974	0.203578	0.0587678
11.7129	0.148728	-0.416595	0.327446	0.0646811	0.297388	-0.00982968	0.127635	-0.190694	0.20682	0.0616196	0.193478	0.078626						0.0741085	0.198442	0.0572852
11.8112	0.139475	-0.402443	0.313949	0.0460294	0.295513	0.00100699	0.113532	-0.185131	0.219496	0.0451853	0.194361	0.07158						0.0710463	0.193464	0.0558481
11.9095	0.130478	-0.388156	0.301279	0.0228397	0.293811	0.013197	0.0984931	-0.174138	0.234414	0.0352632	0.195065	0.0667285						0.0691062	0.188612	0.0544475
12.0078	0.126061	-0.370751	0.287213	-0.000424891	0.293429	0.021517	0.0829147	-0.163139	0.247307	0.0273287	0.199726	0.0650439						0.0680189	0.184029	0.0531247
12.1061	0.121516	-0.353263	0.271657	-0.0254127	0.292726	0.0249138	0.0720434	-0.153633	0.26458	0.0207447	0.203455	0.0631652						0.0668743	0.180568	0.0521254
12.2044	0.11509	-0.339886	0.2542	-0.0490418	0.291133	0.0292046	0.0604019	-0.14724	0.280107	0.0137299	0.206439	0.0609287						0.0645888	0.178337	0.0514814
12.3027	0.112074	-0.329533	0.239889	-0.0690743	0.28825	0.0342149	0.0496063	-0.14506	0.287112	0.00840568	0.21337	0.0575971						0.0622376	0.177035	0.0511057
12.401	0.107975	-0.320664	0.22549	-0.0837968	0.286183	0.0377849	0.0376419	-0.142466	0.291003	0.00697854	0.225309	0.0498655						0.0601086	0.176073	0.0508278
12.4994	0.101911	-0.317643	0.210088	-0.10004	0.277963	0.0405468	0.0279874	-0.141083	0.298235	0.0031844	0.233373	0.0447641						0.0566072	0.176066	0.050826
12.5977	0.0963293	-0.31397	0.198681	-0.118118	0.269802	0.0424619	0.0202097	-0.139954	0.300689	-0.00411392	0.239619	0.0366543						0.0523575	0.176108	0.0508381
12.696	0.0875515	-0.310268	0.184539	-0.134279	0.260528	0.0445159	0.0165661	-0.137945	0.300642	-0.00993762	0.247743	0.0277242						0.048115	0.1756	0.0506914
12.7943	0.0766859	-0.308158	0.169962	-0.149361	0.250352	0.0476901	0.0122361	-0.140913	0.302459	-0.0142556	0.257411	0.0173328						0.0434534	0.176206	0.0508662
12.8926	0.0670796	-0.312632	0.155584	-0.165017	0.239439	0.0541561	0.0064018	-0.146412	0.30352	-0.0162115	0.268339	0.00797568						0.0385186	0.178435	0.0515098
12.9909	0.0567206	-0.318623	0.142274	-0.175056	0.22694	0.0569647	0.00467456	-0.153797	0.30157	-0.0182174	0.278237	0.00319585						0.0337404	0.180067	0.0519808
13.0892	0.0437064	-0.325059	0.129413	-0.181494	0.214126	0.0595633	0.00413771	-0.15671	0.298376	-0.01189	0.286614	-0.00180808						0.0299146	0.180697	0.0521627
13.1875	0.030089	-0.325798	0.116022	-0.183424	0.202313	0.0625438	0.00334498	-0.161894	0.290171	-0.0020999	0.295552	-0.00957682						0.0264368	0.179925	0.05194
13.2858	0.0184933	-0.322341	0.106072	-0.1818	0.189491	0.0648856	0.000612897	-0.164506	0.279864	0.00437914	0.306877	-0.0166034						0.0237854	0.178356	0.051487
13.3841	0.00594978	-0.323429	0.0994885	-0.17302	0.171706	0.0671408	0.00273328	-0.16518	0.267537	0.0184121	0.319737	-0.0209075						0.022514	0.176602	0.0509807
13.4824	-0.00679035	-0.32346	0.0910187	-0.159429	0.153794	0.0672535	0.00457286	-0.165952	0.252168	0.0371663	0.331772	-0.0249265						0.0214324	0.174228	0.0502952
13.5807	-0.0190361	-0.325925	0.0832734	-0.143127	0.137178	0.0671407	0.0039324	-0.164011	0.233995	0.057376	0.344214	-0.03149						0.0202933	0.172441	0.0497793
13.679	-0.0300154	-0.329834	0.0781963	-0.125897	0.121087	0.0656739	0.0039814	-0.158407	0.211102	0.0805171	0.3552	-0.0357365						0.0196557	0.170684	0.0492721
13.7773	-0.0413857	-0.337078	0.0723005	-0.105092	0.107906	0.0618363	0.0082298	-0.151274	0.189648	0.098161	0.364959	-0.0343237						0.0194905	0.169667	0.0489786
13.8756	-0.0524403	-0.344562	0.0680032	-0.0872811	0.0930168	0.0557074	0.0124728	-0.144575	0.168478	0.123038	0.374434	-0.0337728						0.0193765	0.170021	0.0490809
13.9739	-0.0625279	-0.350881	0.0657441	-0.0694109	0.076701	0.0506509	0.020755	-0.142118	0.14672	0.140856	0.382792	-0.0372875						0.0184995	0.170886	0.0493306
14.0722	-0.0732557	-0.356638	0.0668454	-0.0519708	0.0594984	0.0460616	0.0287993	-0.139931	0.124141	0.154616	0.389467	-0.0434394						0.0170161	0.172049	0.0496664
14.1705	-0.0814437	-0.363096	0.0717843	-0.0335117	0.0419906	0.0447585	0.031371	-0.133802	0.097138	0.171153	0.397642	-0.0491556						0.0162357	0.174046	0.0502426
14.2688	-0.0897996	-0.368913	0.0761678	-0.0196781	0.0256746	0.0408113	0.0379071	-0.126738	0.0665283	0.191345	0.405687	-0.0529094						0.0155069	0.176944	0.0510792
14.3671	-0.102218	-0.371366	0.0806753	-0.00818153	0.0121869	0.0358419	0.0428024	-0.116683	0.0434024	0.209342	0.409391	-0.0562682						0.0149104	0.179263	0.0517489
14.4654	-0.112151	-0.373435	0.0869357	-3.43207e-05	-0.00186184	0.0306477	0.0469449	-0.106469	0.0221464	0.22593	0.410377	-0.0601582						0.0140727	0.181489	0.0523913
14.5637	-0.121441	-0.374578	0.0946703	0.00986419	-0.00972097	0.0227563	0.0499733	-0.0981043	-0.00547433	0.242838	0.413634	-0.0618167						0.01355	0.184518	0.0532657
14.662	-0.131637	-0.376396	0.100779	0.0243886	-0.017045	0.0173902	0.0486528	-0.0912794	-0.0303614	0.262983	0.414046	-0.0605875						0.0134111	0.187988	0.0542675
14.7603	-0.137729	-0.37795	0.109594	0.0376961	-0.0264325	0.0138069	0.0469859	-0.0852662	-0.0512803	0.281434	0.414151	-0.0598362						0.0137645	0.191546	0.0552945
14.8586	-0.141097	-0.378892	0.120625	0.051464	-0.0367383	0.00677166	0.0455221	-0.0768338	-0.0711421	0.297864	0.414619	-0.0596694						0.0143745	0.195109	0.0563232
14.957	-0.143535	-0.374866	0.129859	0.0678139	-0.0440552	-0.00321096	0.0458463	-0.0630097	-0.0922376	0.313655	0.410668	-0.0584294						0.0157082	0.197189	0.0569235
15.0553	-0.142816	-0.370262	0.138329	0.082912	-0.0514684	-0.0103969	0.0419759	-0.041683	-0.110442	0.327635	0.40444	-0.055295						0.0177441	0.198358	0.0572609
15.1536	-0.137604	-0.365009	0.148888	0.0987433	-0.0568267	-0.0192455	0.0368699	-0.024994	-0.129271	0.334227	0.396279	-0.0526945						0.0191135	0.198645	0.0573438
15.2519	-0.129706	-0.365709	0.157309	0.111647	-0.0607317	-0.030865	0.0324467	-0.0066415	-0.145327	0.339026	0.388566	-0.0454803						0.0203778	0.199509	0.0575931
15.3502	-0.124638	-0.368034	0.16364	0.122382	-0.0619479	-0.0407103	0.0269252	0.00900501	-0.162234	0.348065	0.380676	-0.0403738						0.0210628	0.201604	0.0581981
15.4485	-0.118943	-0.366566	0.168231	0.128288	-0.0613728	-0.0496543	0.0170559	0.0228165	-0.180126	0.350254	0.372062	-0.0371821						0.0204053	0.202126	0.0583489
15.5468	-0.111048	-0.366613	0.174351	0.131931	-0.0603279	-0.0579341	0.00621798	0.0355136	-0.191439	0.341463	0.360443	-0.0336907						0.0190722	0.200577	0.0579015
15.6451	-0.106519	-0.36448	0.17851	0.137206	-0.057287	-0.0666787	-0.00277879	0.042967	-0.202377	0.330057	0.354743	-0.02788						0.0179568	0.199397	0.0575609
15.7434	-0.102677	-0.36063	0.179209	0.142593	-0.0562056	-0.071516	-0.0123985	0.0458789	-0.21195	0.316024	0.3513	-0.0219501						0.016473	0.197697	0.0570702
15.8417	-0.0950378	-0.352206	0.181005	0.145329	-0.0582541	-0.0749776	-0.0236341	0.0476851	-0.225124	0.304884	0.346321	-0.0191749						0.0147347	0.19582	0.0565285
15.94	-0.0858825	-0.340179	0.181881	0.152671	-0.0587438	-0.0767532	-0.0331588	0.0472497	-0.242125	0.285063	0.342073	-0.0163692						0.0129772	0.193069	0.0557342
16.0383	-0.0759325	-0.327317	0.180027	0.161995	-0.0572955	-0.0809154	-0.045112	0.0493156	-0.258919	0.266791	0.341612	-0.0101065						0.012012	0.191298	0.0552229
16.1366	-0.0676382	-0.316543	0.176053	0.170051	-0.0548362	-0.0837739	-0.0560125	0.0514771	-0.276047	0.251573	0.340536	-0.00455739						0.0108568	0.190298	0.0549344
16.2349	-0.0577413	-0.305065	0.167921	0.180144	-0.0517678	-0.0876243	-0.0627108	0.0486619	-0.291647	0.234722	0.338247	-0.00133057						0.00931732	0.188686	0.054469
16.3332	-0.0463749	-0.293322	0.159389	0.193619	-0.0492649	-0.0934268	-0.0734424	0.0415695	-0.306793	0.213768	0.336607	-0.00143464						0.00674108	0.187514	0.0541307
16.4315	-0.0314985	-0.285294	0.149965	0.205352	-0.0484737	-0.099055	-0.0811795	0.0319255	-0.327476	0.193106	0.333604	-0.00113177						0.00332046	0.18764	0.054167
16.5298	-0.0145506	-0.277215	0.138475	0.216039	-0.0481875	-0.102297	-0.0851272	0.0195377	-0.340792	0.170565	0.33149	0.00300022						0.000911477	0.186735	0.0539058
16.6281	0.00262955	-0.266764	0.127781	0.225935	-0.0495593	-0.102486	-0.0878302	0.00912426	-0.353735	0.14877	0.328065	0.00329449						-0.00123129	0.185783	0.0536308
16.7264	0.0217364	-0.258366	0.116564	0.23473	-0.04864	-0.103455	-0.0857802	-0.00143978	-0.371952	0.123126	0.327726	0.000486047						-0.00377206	0.186432	0.0538182
16.8247	0.0403894	-0.250948	0.102364	0.242764	-0.0451397	-0.104355	-0.0845862	-0.012622	-0.393859	0.101504	0.325046	-0.00150186						-0.00674533	0.188149	0.0543139
16.923	0.0595597	-0.241569	0.0873365	0.24753	-0.0395981	-0.10197	-0.0833763	-0.0262804	-0.419963	0.0816647	0.320374	-0.00251211						-0.00990026	0.190376	0.0549569
17.0213	0.0784456	-0.233425	0.0711241	0.248481	-0.0361666	-0.0992424	-0.0802919	-0.044964	-0.444775	0.0640267	0.323025	-0.00446305						-0.0131855	0.193922	0.0559806
17.1196	0.0945556	-0.224367	0.0551575	0.246414	-0.02944	-0.0939294	-0.0743483	-0.0702919	-0.472303	0.0478521	0.327573	-0.0115029						-0.0170525	0.198433	0.0572827
17.2179	0.106149	-0.216093	0.037232	0.243421	-0.0205457	-0.0842547	-0.063569	-0.0911336	-0.500606	0.0376812	0.334852	-0.0174871						-0.0195295	0.203788	0.0588284
17.3162	0.114679	-0.205383	0.0214695	0.241865	-0.0123203	-0.074962	-0.0528074	-0.11374	-0.52964	0.0301838	0.342042	-0.0282432						-0.0222381	0.209975	0.0606146
17.4146	0.126748	-0.196023	0.00571849	0.240963	-0.00519308	-0.0650382	-0.0408017	-0.135926	-0.559112	0.0207525	0.348023	-0.0401874						-0.0250064	0.217035	0.0626527
17.5129	0.137287	-0.188984	-0.0106092	0.240281	0.00460883	-0.0556375	-0.0261811	-0.157637	-0.585473	0.0134415	0.35666	-0.0536035						-0.0271539	0.224583	0.0648316
17.6112	0.146695	-0.180891	-0.0269543	0.237975	0.0148664	-0.0452569	-0.0103088	-0.17922	-0.612618	0.0157425	0.372808	-0.0644515						-0.0276344	0.233741	0.0674753
17.7095	0.160577	-0.174298	-0.0418279	0.231623	0.0216715	-0.0357481	0.00319244	-0.198982	-0.633684	0.0189984	0.38377	-0.0734869						-0.028183	0.241174	0.069621
17.8078	0.175638	-0.16932	-0.0553445	0.227405	0.0321736	-0.0290225	0.0197424	-0.218367	-0.65079	0.0215021	0.394314	-0.0800934						-0.0276802	0.248485	0.0717315
17.9061	0.190062	-0.167167	-0.0696851	0.223841	0.0461071	-0.0215657	0.0373414	-0.239523	-0.66242	0.0281797	0.40724	-0.0874589						-0.026254	0.2558	0.073843
18.0044	0.204469	-0.169851	-0.084872	0.215589	0.0597939	-0.0139321	0.0545689	-0.256712	-0.666189	0.0389084	0.415636	-0.0936889						-0.02469	0.260852	0.0753014
18.1027	0.216864	-0.176815	-0.0974083	0.206325	0.0744038	-0.0059644	0.0703048	-0.274939	-0.665281	0.0500135	0.417716	-0.100144						-0.0237437	0.264466	0.0763448
18.201	0.230058	-0.181691	-0.10888	0.198682	0.0892088	0.000444218	0.085026	-0.294795	-0.661918	0.0586698	0.419054	-0.103085						-0.0224356	0.267882	0.0773309
18.2993	0.238092	-0.186656	-0.11815	0.187007	0.103347	0.00644143	0.0978943	-0.310873	-0.653612	0.0690218	0.416481	-0.103741						-0.0212289	0.268978	0.0776473
18.3976	0.246987	-0.191358	-0.124524	0.173158	0.119224	0.014453	0.113138	-0.323449	-0.641762	0.0858751	0.413608	-0.10281						-0.0181217	0.26955	0.0778124
18.4959	0.251475	-0.193305	-0.132389	0.160403	0.1364	0.0214826	0.126381	-0.334777	-0.623972	0.105655	0.415946	-0.0971551						-0.0136546	0.26952	0.0778038
18.5942	0.251278	-0.193405	-0.13923	0.147904	0.152653	0.0271626	0.136448	-0.342466	-0.611475	0.128215	0.415794	-0.0912914						-0.0098677	0.269589	0.0778237
18.6925	0.250907	-0.196297	-0.146776	0.134693	0.167875	0.0307604	0.145158	-0.352031	-0.591795	0.150472	0.416536	-0.0850384						-0.00629473	0.269013	0.0776575
18.7908	0.25059	-0.198457	-0.154462	0.119233	0.179226	0.0325665	0.15126	-0.362003	-0.560802	0.178144	0.419971	-0.0762506						-0.00174868	0.267044	0.077089
18.8891	0.249942	-0.19745	-0.16063	0.104759	0.191996	0.0321894	0.156274	-0.37133	-0.536383	0.204315	0.427796	-0.0685319						0.0027455	0.267006	0.077078
18.9874	0.247243	-0.198907	-0.16717	0.0930197	0.206223	0.0321798	0.160942	-0.375995	-0.509581	0.231346	0.438508	-0.0605296						0.00810651	0.267159	0.0771222
19.0857	0.24512	-0.202711	-0.167125	0.0857034	0.223707	0.033661	0.161912	-0.3768	-0.479282	0.257236	0.445574	-0.0518619						0.0145944	0.266204	0.0768465
19.184	0.244517	-0.208399	-0.165559	0.0799759	0.238342	0.0341095	0.159069	-0.375743	-0.444016	0.284351	0.452168	-0.041116						0.0214749	0.264591	0.0763807
19.2823	0.246097	-0.215126	-0.163104	0.0725418	0.250226	0.0328693	0.151106	-0.379157	-0.407108	0.310537	0.457107	-0.0290369						0.027246	0.26332	0.0760138
19.3806	0.248518	-0.222559	-0.162184	0.0646304	0.262797	0.0313636	0.144002	-0.381159	-0.371635	0.335947	0.460145	-0.0169605						0.032742	0.262674	0.0758273
19.4789	0.248756	-0.228119	-0.161595	0.0584697	0.275307	0.0265312	0.134689	-0.38088	-0.331777	0.361914	0.464423	-0.00160815						0.0388425	0.261693	0.0755444
19.5772	0.250329	-0.232684	-0.160304	0.0542765	0.28546	0.0210458	0.124238	-0.380541	-0.285979	0.387759	0.466721	0.0158155						0.0455115	0.260287	0.0751384
19.6755	0.249868	-0.238072	-0.159953	0.0510636	0.296508	0.0131487	0.110979	-0.377442	-0.24655	0.412996	0.463059	0.0312491						0.0505712	0.259203	0.0748256
19.7738	0.24641	-0.243679	-0.158738	0.0497942	0.310559	0.00664344	0.0983544	-0.370308	-0.211258	0.438594	0.457836	0.0456062						0.0558177	0.258581	0.0746458
19.8722	0.240826	-0.248856	-0.156288	0.045938	0.320831	-0.000606092	0.0825828	-0.358227	-0.178519	0.467814	0.453272	0.0558839						0.0603877	0.258212	0.0745393
19.9705	0.231096	-0.252936	-0.152356	0.0430981	0.329774	-0.00716672	0.0654653	-0.343686	-0.153708	0.491444	0.449714	0.0682497						0.0640823	0.257621	0.0743689
20.0688	0.220725	-0.253134	-0.145043	0.0435166	0.338774	-0.0148578	0.0489361	-0.331116	-0.133394	0.515162	0.453148	0.0795606						0.0685231	0.258403	0.0745944
20.1671	0.209887	-0.248571	-0.139087	0.0436228	0.344883	-0.0227235	0.035692	-0.317757	-0.119769	0.539839	0.463898	0.0855249						0.0729534	0.260322	0.0751486
20.2654	0.197427	-0.245394	-0.134316	0.0409596	0.349823	-0.0284295	0.0229426	-0.300716	-0.10868	0.568783	0.480062	0.08813						0.0775493	0.263698	0.0761231
20.3637	0.187773	-0.241514	-0.130501	0.0394651	0.356815	-0.0343672	0.00967866	-0.28597	-0.107201	0.589933	0.503342	0.0923236						0.0816481	0.268319	0.0774569
20.462	0.176118	-0.238251	-0.128109	0.0389834	0.361366	-0.0411467	-0.00505847	-0.271689	-0.107529	0.602311	0.521511	0.0945498						0.0835879	0.2713	0.0783174
20.5603	0.168538	-0.234431	-0.124648	0.0409484	0.365349	-0.047405	-0.0188988	-0.256208	-0.111657	0.615052	0.537459	0.087777						0.0851563	0.274258	0.0791714
20.6586	0.161942	-0.232147	-0.122148	0.0454106	0.372066	-0.0539717	-0.0315293	-0.241931	-0.119175	0.62845	0.553053	0.0782779						0.0865247	0.27828	0.0803326
20.7569	0.153716	-0.22692	-0.120263	0.0516139	0.38084	-0.0586307	-0.0418998	-0.224842	-0.132021	0.639614	0.565716	0.0713179						0.0881868	0.281568	0.0812818
20.8552	0.143062	-0.220666	-0.11683	0.0581316	0.391838	-0.0583028	-0.0513063	-0.208809	-0.156308	0.648821	0.576531	0.0608311						0.088916	0.285186	0.0823262
20.9535	0.129781	-0.21788	-0.113592	0.0624348	0.398989	-0.0556674	-0.0607117	-0.191572	-0.170922	0.654503	0.581733	0.050218						0.0889429	0.286849	0.0828061
21.0518	0.115997	-0.211605	-0.109105	0.0672265	0.400658	-0.0547413	-0.0685901	-0.176882	-0.181067	0.656481	0.588096	0.0400435						0.0888759	0.287315	0.0829406
21.1501	0.0990238	-0.203775	-0.110543	0.0697649	0.399225	-0.0574677	-0.0743729	-0.163951	-0.199768	0.656202	0.59575	0.030838						0.0867439	0.288617	0.0833164
21.2484	0.0804292	-0.193614	-0.114512	0.0743272	0.400667	-0.0629381	-0.0785164	-0.149052	-0.224417	0.65267	0.6037	0.0220794						0.0842353	0.290345	0.0838155
21.3467	0.0625933	-0.182032	-0.120368	0.080455	0.402042	-0.0688944	-0.0823818	-0.129389	-0.241678	0.645841	0.612075	0.00789974						0.0821803	0.291133	0.0840429
21.445	0.0441606	-0.168431	-0.125009	0.0856888	0.402485	-0.0714323	-0.0874804	-0.110466	-0.252848	0.635932	0.622802	-0.00408356						0.0809432	0.291242	0.0840742
21.5433	0.0252229	-0.156873	-0.128125	0.0877502	0.402832	-0.0707331	-0.0931323	-0.0938116	-0.267719	0.621762	0.633001	-0.0176092						0.0785472	0.291453	0.0841353
21.6416	0.0069395	-0.14689	-0.130146	0.0878519	0.402532	-0.0688381	-0.0994811	-0.0773582	-0.290484	0.605984	0.641225	-0.0323882						0.0749122	0.292319	0.0843853
21.7399	-0.00918707	-0.137512	-0.131266	0.0885301	0.398167	-0.0654807	-0.103352	-0.063663	-0.309937	0.585754	0.651628	-0.049691						0.0711659	0.292561	0.0844551
21.8382	-0.0222796	-0.127743	-0.134085	0.091806	0.390158	-0.0606428	-0.107036	-0.0546911	-0.326638	0.56314	0.666395	-0.0707214						0.0673051	0.293274	0.0846608
21.9365	-0.0334741	-0.116948	-0.137836	0.0962131	0.383379	-0.0521369	-0.108555	-0.0509589	-0.341354	0.537693	0.67787	-0.0883123						0.0637982	0.293149	0.0846247
22.0348	-0.0403026	-0.108609	-0.142226	0.0994846	0.377662	-0.0464848	-0.109064	-0.046915	-0.35035	0.51296	0.685688	-0.108911						0.0602443	0.292515	0.0844418
22.1331	-0.0470999	-0.104657	-0.148845	0.101761	0.371772	-0.037867	-0.111407	-0.0461794	-0.357831	0.485291	0.690475	-0.128096						0.0556098	0.291473	0.084141
22.2314	-0.0547776	-0.103356	-0.1531	0.104167	0.365014	-0.0272755	-0.117301	-0.0490925	-0.360232	0.45742	0.690394	-0.141345						0.0508762	0.289062	0.0834451
22.3298	-0.0632039	-0.102216	-0.156979	0.110757	0.359157	-0.0194096	-0.123244	-0.0539067	-0.357695	0.425888	0.687356	-0.154076						0.0460357	0.285615	0.0824499
22.4281	-0.0736656	-0.10205	-0.161996	0.119692	0.350604	-0.0104452	-0.126865	-0.0566921	-0.346472	0.400732	0.680614	-0.171471						0.0418321	0.281517	0.0812668
22.5264	-0.0814097	-0.099882	-0.168025	0.127484	0.342508	0.00150097	-0.12855	-0.0573792	-0.333429	0.381307	0.679369	-0.181771						0.0401436	0.278393	0.0803653
22.6247	-0.0899774	-0.099232	-0.17412	0.132585	0.332295	0.0166541	-0.129375	-0.062161	-0.318947	0.356082	0.676235	-0.186478						0.0377967	0.27395	0.0790826
22.723	-0.0984088	-0.0977666	-0.178667	0.135746	0.321	0.0326569	-0.133889	-0.0688363	-0.300679	0.325833	0.67244	-0.193566						0.0346554	0.268975	0.0776464
22.8213	-0.104341	-0.0976807	-0.183937	0.138071	0.308487	0.0474576	-0.142704	-0.0776347	-0.279615	0.298125	0.670348	-0.202393						0.031182	0.265025	0.0765061
22.9196	-0.109448	-0.0983604	-0.189392	0.14005	0.296991	0.0552877	-0.149966	-0.0815174	-0.253557	0.268232	0.666729	-0.208748						0.0280251	0.2602	0.0751134
23.0179	-0.113881	-0.0982585	-0.193551	0.145983	0.286812	0.0625504	-0.152766	-0.0864478	-0.229971	0.237493	0.669188	-0.214164						0.0260822	0.257097	0.0742175
23.1162	-0.117076	-0.102487	-0.201104	0.152586	0.281225	0.0717343	-0.156358	-0.0953182	-0.209319	0.209087	0.668101	-0.219234						0.0234863	0.255121	0.073647
23.2145	-0.118745	-0.107465	-0.2062	0.157499	0.274984	0.0838709	-0.161156	-0.106943	-0.180387	0.184912	0.664797	-0.226991						0.0215146	0.252931	0.0730149
23.3128	-0.119388	-0.114595	-0.208985	0.161368	0.263963	0.0989838	-0.160973	-0.122058	-0.149428	0.161866	0.661635	-0.234049						0.0198618	0.250619	0.0723476
23.4111	-0.121023	-0.121902	-0.210559	0.167336	0.252635	0.114885	-0.158998	-0.142124	-0.122891	0.137071	0.655922	-0.232952						0.0181167	0.248126	0.0716278
23.5094	-0.120871	-0.131514	-0.213487	0.173899	0.240303	0.125807	-0.159734	-0.162845	-0.100956	0.115101	0.650264	-0.234483						0.0151236	0.246957	0.0712903
23.6077	-0.119774	-0.138936	-0.217139	0.185734	0.22771	0.13488	-0.158829	-0.181703	-0.079622	0.102685	0.645728	-0.236212						0.0137102	0.246808	0.0712474
23.706	-0.119636	-0.145224	-0.220223	0.199444	0.214335	0.144615	-0.157429	-0.198888	-0.0523509	0.095476	0.643942	-0.235116						0.0140788	0.247368	0.0714089
23.8043	-0.118584	-0.149921	-0.220802	0.212455	0.204975	0.153929	-0.153462	-0.214782	-0.0250802	0.088943	0.641109	-0.229344						0.0157863	0.247486	0.0714429
23.9026	-0.121913	-0.152793	-0.220065	0.222911	0.19916	0.160179	-0.148183	-0.22843	-0.0040141	0.0862823	0.635914	-0.219547						0.0174584	0.247012	0.0713062
24.0009	-0.1269	-0.157128	-0.218098	0.232688	0.192828	0.163765	-0.144989	-0.237566	0.0155865	0.0874982	0.632629	-0.212439						0.0189895	0.247131	0.0713406
24.0992	-0.133015	-0.158072	-0.216835	0.243498	0.183177	0.169969	-0.14096	-0.247935	0.0341434	0.0956619	0.631233	-0.204239						0.0213855	0.247953	0.071578
24.1975	-0.139413	-0.15578	-0.216188	0.255914	0.17078	0.172539	-0.134778	-0.2535	0.0503088	0.108995	0.628609	-0.196675						0.0242344	0.248074	0.0716128
24.2958	-0.14305	-0.154131	-0.218247	0.267667	0.161308	0.172016	-0.1243	-0.254254	0.0611791	0.122971	0.627831	-0.190442						0.027379	0.248246	0.0716624
24.3941	-0.14285	-0.15534	-0.218625	0.276092	0.151711	0.173271	-0.111865	-0.255695	0.0670465	0.134212	0.624723	-0.185268						0.0297845	0.247649	0.07149
24.4924	-0.138533	-0.158379	-0.21445	0.280808	0.142538	0.171426	-0.101767	-0.257937	0.0700221	0.145406	0.624317	-0.175231						0.0323517	0.246589	0.0711841
24.5907	-0.137864	-0.163398	-0.207889	0.288162	0.133046	0.164577	-0.0950033	-0.264316	0.0701101	0.15865	0.621815	-0.170766						0.0330937	0.246373	0.0711217
24.689	-0.138546	-0.167799	-0.199991	0.295984	0.123635	0.154824	-0.0888203	-0.269883	0.0689843	0.175069	0.622553	-0.165168						0.0342367	0.246835	0.0712552
24.7874	-0.137794	-0.171362	-0.190787	0.303114	0.109586	0.14392	-0.0772711	-0.273979	0.0668103	0.196473	0.628568	-0.15588						0.0367833	0.247759	0.0715218
24.8857	-0.137005	-0.173523	-0.178965	0.311696	0.094404	0.133856	-0.0607435	-0.277507	0.0639886	0.218218	0.635218	-0.147144						0.0402078	0.248841	0.0718341
24.984	-0.133685	-0.174608	-0.168331	0.320706	0.0784297	0.126995	-0.0455508	-0.285315	0.0583182	0.242323	0.646028	-0.137816						0.0439579	0.251758	0.0726763
25.0823	-0.127496	-0.175127	-0.158824	0.327252	0.0643861	0.118798	-0.034665	-0.292693	0.0502403	0.272519	0.650527	-0.127512						0.0472838	0.253932	0.0733039
25.1806	-0.118731	-0.171028	-0.144176	0.330884	0.0502501	0.107211	-0.0241771	-0.294077	0.0411255	0.299743	0.65554	-0.118442						0.0511769	0.254718	0.0735307
25.2789	-0.108984	-0.165324	-0.130307	0.335912	0.0379742	0.0927618	-0.011306	-0.29231	0.0296804	0.324105	0.664146	-0.109672						0.0555565	0.256036	0.0739111
25.3772	-0.099064	-0.158522	-0.119223	0.339288	0.0278643	0.0762603	-0.00556751	-0.288135	0.0175824	0.348521	0.676104	-0.101824						0.0594404	0.258325	0.074572
25.4755	-0.086974	-0.152829	-0.106225	0.338746	0.017089	0.0597437	-0.00105821	-0.28154	0.00567722	0.374939	0.690171	-0.0982232						0.063293	0.261184	0.0753973
25.5738	-0.0748383	-0.146471	-0.0888967	0.337193	0.0083475	0.0465182	0.00618855	-0.271449	-0.00750329	0.400023	0.705734	-0.0927906						0.0685046	0.263793	0.0761505
25.6721	-0.0635154	-0.140057	-0.0724716	0.329486	-0.00260115	0.0318691	0.0149164	-0.262146	-0.0217027	0.41671	0.723123	-0.0874499						0.0721801	0.26608	0.0768106
25.7704	-0.0489003	-0.132047	-0.056792	0.318955	-0.0118269	0.0148635	0.025202	-0.255777	-0.0432165	0.426326	0.738516	-0.0841809						0.0742601	0.267884	0.0773314
25.8687	-0.0336174	-0.123383	-0.0433037	0.307671	-0.0203617	-0.00268086	0.0325625	-0.25083	-0.0667842	0.440192	0.753249	-0.0838059						0.0757424	0.270968	0.0782216
25.967	-0.0149511	-0.116728	-0.0309614	0.294203	-0.0313165	-0.019732	0.0391479	-0.247546	-0.0863906	0.453734	0.765675	-0.0849699						0.0766804	0.274135	0.0791361
26.0653	0.00507847	-0.109758	-0.0201772	0.279934	-0.0430178	-0.0391141	0.0468789	-0.246734	-0.106679	0.46126	0.776923	-0.0852425						0.0766126	0.27717	0.0800122
26.1636	0.0229682	-0.106692	-0.00687501	0.264244	-0.0519018	-0.0595692	0.0532489	-0.246636	-0.125554	0.460602	0.787699	-0.0829692						0.0757137	0.279608	0.080716
26.2619	0.0404906	-0.105401	0.00741109	0.245146	-0.0549516	-0.0792226	0.0569819	-0.246763	-0.140657	0.458331	0.799553	-0.0821707						0.0748956	0.282092	0.081433
26.3602	0.0571854	-0.102507	0.0221111	0.226314	-0.0589337	-0.0954128	0.0572709	-0.248846	-0.153404	0.45438	0.81029	-0.0836394						0.0737341	0.284544	0.0821409
26.4585	0.0717225	-0.0939338	0.0331663	0.208177	-0.0628359	-0.112329	0.0536158	-0.251457	-0.164047	0.455729	0.82354	-0.0837407						0.0731339	0.288202	0.0831967
26.5568	0.0833343	-0.0834495	0.0408454	0.191549	-0.066118	-0.126327	0.0510445	-0.255463	-0.174608	0.455482	0.835879	-0.0880678						0.0720084	0.291925	0.0842715
26.6551	0.0953104	-0.0707869	0.0497796	0.174782	-0.0695037	-0.136032	0.0514944	-0.256762	-0.184669	0.448096	0.84733	-0.0917747						0.0714387	0.294261	0.084946
26.7534	0.106016	-0.0592496	0.0565302	0.158091	-0.0692762	-0.147717	0.048736	-0.255395	-0.193998	0.442813	0.854998	-0.0984272						0.07026	0.296135	0.0854867
26.8517	0.115712	-0.0511821	0.0596622	0.141343	-0.062588	-0.159928	0.0426392	-0.252649	-0.206102	0.438355	0.860127	-0.105588						0.0683168	0.297809	0.0859702
26.95	0.12552	-0.0469171	0.0608524	0.121704	-0.0563215	-0.172804	0.0329526	-0.251777	-0.22252	0.43	0.864429	-0.109864						0.0646047	0.299669	0.0865071
27.0483	0.134054	-0.0439385	0.0627062	0.104051	-0.0519654	-0.18615	0.023216	-0.248926	-0.234258	0.419832	0.861427	-0.11522						0.0604025	0.299611	0.0864903
27.1466	0.141865	-0.0425461	0.0628493	0.0879761	-0.0497702	-0.197322	0.014585	-0.247845	-0.24708	0.406874	0.865064	-0.122695						0.0559963	0.301252	0.0869641
27.245	0.145237	-0.0462811	0.061461	0.0732627	-0.0503642	-0.204983	0.00632416	-0.250655	-0.258325	0.397517	0.870509	-0.129061						0.0512202	0.303797	0.0876988
27.3433	0.149301	-0.0509422	0.0624428	0.059289	-0.0517138	-0.208052	-0.00809594	-0.255194	-0.270372	0.386628	0.869223	-0.131657						0.0459048	0.304635	0.0879405
27.4416	0.155003	-0.05646	0.066502	0.0458323	-0.0519372	-0.211321	-0.0196869	-0.25988	-0.279541	0.379484	0.860062	-0.135714						0.0410285	0.304014	0.0877612
27.5399	0.15593	-0.0609228	0.0669257	0.0345523	-0.050499	-0.215527	-0.0294253	-0.264205	-0.290361	0.373043	0.850503	-0.143192						0.0355684	0.303524	0.0876197
27.6382	0.155865	-0.0647606	0.0627215	0.0270462	-0.0484274	-0.218	-0.0381408	-0.273574	-0.299403	0.367938	0.836024	-0.148867						0.0298685	0.302039	0.0871912
27.7365	0.157056	-0.070179	0.0588955	0.0223612	-0.0422996	-0.21833	-0.0472561	-0.284023	-0.303608	0.366819	0.815626	-0.154232						0.0250692	0.299186	0.0863675
27.8348	0.151874	-0.076371	0.0524846	0.0207858	-0.03529	-0.216964	-0.059834	-0.292117	-0.303501	0.368669	0.796924	-0.160294						0.0205305	0.296236	0.085516
27.9331	0.141458	-0.0856274	0.0448782	0.0206769	-0.0308403	-0.214822	-0.0728532	-0.299922	-0.297254	0.364751	0.781665	-0.165191						0.0155765	0.29282	0.0845299
28.0314	0.131364	-0.0955834	0.0395575	0.0245902	-0.0253797	-0.213027	-0.085877	-0.3052	-0.289267	0.360597	0.770082	-0.172992						0.0115721	0.290138	0.0837556
28.1297	0.120249	-0.105103	0.034605	0.0322294	-0.0186594	-0.206306	-0.100124	-0.309791	-0.281342	0.355708	0.76061	-0.17976						0.00852636	0.287561	0.0830119
28.228	0.112375	-0.110927	0.0258015	0.0418449	-0.013631	-0.200801	-0.113492	-0.314997	-0.275673	0.355408	0.751238	-0.187652						0.00579125	0.285984	0.0825564
28.3263	0.104734	-0.115433	0.016192	0.0527542	-0.0130537	-0.195623	-0.125491	-0.323978	-0.270566	0.355425	0.740397	-0.195233						0.00251036	0.284641	0.0821689
28.4246	0.0956354	-0.118562	0.0060466	0.0652589	-0.0129307	-0.191239	-0.137701	-0.33209	-0.263227	0.353916	0.728651	-0.198358						-0.000383351	0.282593	0.0815776
28.5229	0.0877041	-0.124447	-0.00125354	0.0790561	-0.014476	-0.186596	-0.145233	-0.339701	-0.251769	0.350965	0.714004	-0.199433						-0.00259822	0.279435	0.0806659
28.6212	0.0794978	-0.129897	-0.00805822	0.0946391	-0.0150667	-0.182133	-0.153583	-0.344666	-0.240667	0.351382	0.694955	-0.195657						-0.00410445	0.275443	0.0795136
28.7195	0.0728829	-0.139502	-0.0202784	0.107593	-0.0142149	-0.178795	-0.162049	-0.349046	-0.229931	0.355868	0.676364	-0.192411						-0.00612648	0.272423	0.0786418
28.8178	0.0704643	-0.146645	-0.0311255	0.119422	-0.0142673	-0.172642	-0.167061	-0.355934	-0.2138	0.355127	0.660077	-0.192483						-0.00740559	0.269293	0.0777383
28.9161	0.0686371	-0.150725	-0.0401162	0.133678	-0.0146604	-0.162475	-0.170568	-0.363378	-0.194423	0.34824	0.642716	-0.195447						-0.00821013	0.265236	0.0765672
29.0144	0.0652984	-0.148824	-0.0483813	0.148513	-0.0121507	-0.15214	-0.172348	-0.365779	-0.164143	0.342824	0.625413	-0.2011						-0.00690153	0.260302	0.0751426
29.1127	0.0610729	-0.146417	-0.054492	0.160058	-0.00596942	-0.140316	-0.172997	-0.369233	-0.13164	0.334807	0.612824	-0.207845						-0.00501227	0.256193	0.0739565
29.211	0.0547806	-0.141699	-0.058777	0.169695	0.00074234	-0.130355	-0.171306	-0.369724	-0.0923732	0.329539	0.593975	-0.213779						-0.0024401	0.250654	0.0723576
29.3093	0.0504838	-0.134896	-0.0664087	0.178391	0.00932923	-0.12436	-0.171025	-0.370245	-0.0557919	0.324823	0.57504	-0.221465						-0.000510411	0.246171	0.0710633
29.4076	0.0451175	-0.127373	-0.0768015	0.184252	0.0212132	-0.118405	-0.165071	-0.368836	-0.0175801	0.322234	0.561549	-0.229248						0.0025876	0.242868	0.07011
29.5059	0.0360601	-0.11828	-0.0908922	0.19034	0.0314862	-0.110588	-0.157236	-0.369368	0.0230084	0.31405	0.553136	-0.234971						0.00556202	0.240505	0.0694279
29.6042	0.0306914	-0.111009	-0.104337	0.193953	0.0423115	-0.102208	-0.149806	-0.369036	0.0641418	0.307571	0.54515	-0.233464						0.0094965	0.238391	0.0688175
29.7026	0.0269614	-0.104085	-0.115162	0.194617	0.0513061	-0.0948722	-0.141512	-0.366269	0.109444	0.300347	0.540666	-0.233305						0.0140113	0.237187	0.06847
29.8009	0.0225954	-0.0951529	-0.125198	0.194422	0.059503	-0.089121	-0.133273	-0.362642	0.151017	0.292267	0.54127	-0.231254						0.0187027	0.237043	0.0684285
29.8992	0.021783	-0.0871928	-0.134196	0.191373	0.066816	-0.0859796	-0.123775	-0.358536	0.190639	0.281914	0.538336	-0.228942						0.0226867	0.236343	0.0682263
29.9975	0.0261369	-0.0764154	-0.143046	0.18645	0.0751025	-0.0832091	-0.111762	-0.356025	0.230959	0.277642	0.533171	-0.226332						0.0277227	0.236336	0.0682244
30.0958	0.0301922	-0.0629739	-0.15511	0.179203	0.0843872	-0.078282	-0.098299	-0.352273	0.268368	0.275637	0.52726	-0.218957						0.0332627	0.236066	0.0681463
30.1941	0.0364892	-0.0481175	-0.168125	0.169698	0.0937732	-0.0774141	-0.0830908	-0.350503	0.306291	0.276308	0.520966	-0.210206						0.0388391	0.236802	0.0683589
30.2924	0.0414755	-0.0356871	-0.17775	0.157266	0.104016	-0.076268	-0.0702035	-0.348007	0.345055	0.270814	0.515392	-0.201878						0.0436855	0.237676	0.0686113
30.3907	0.0474428	-0.0248856	-0.185751	0.147229	0.117049	-0.0737011	-0.0571122	-0.342094	0.383003	0.258801	0.511333	-0.193096						0.0490181	0.238407	0.0688222
30.489	0.0561191	-0.017901	-0.190133	0.136271	0.130266	-0.0720883	-0.0423551	-0.337032	0.419969	0.251717	0.511135	-0.187028						0.0549117	0.240751	0.0694987
30.5873	0.0644267	-0.00998806	-0.194946	0.123215	0.14559	-0.0732778	-0.0294823	-0.331791	0.449049	0.242605	0.51301	-0.184236						0.0595146	0.243255	0.0702218
30.6856	0.0760978	-0.000559243	-0.1993	0.106623	0.159356	-0.0767572	-0.0157691	-0.328668	0.480679	0.22425	0.520539	-0.184072						0.0635349	0.247349	0.0714036
30.7839	0.0865342	0.0132486	-0.200501	0.092113	0.170861	-0.079912	-0.00433025	-0.325349	0.515625	0.203843	0.532727	-0.18217						0.0685575	0.25262	0.0729251
30.8822	0.0931407	0.0253856	-0.201304	0.0790736	0.178764	-0.0839763	0.00628414	-0.317974	0.544544	0.188139	0.542261	-0.172656						0.0734734	0.256134	0.0739394
30.9805	0.0986614	0.0354991	-0.201687	0.0643099	0.181638	-0.0923238	0.0180454	-0.315015	0.573689	0.176	0.552988	-0.157569						0.077853	0.260587	0.0752251
31.0788	0.104798	0.0409218	-0.201028	0.0509724	0.183217	-0.100559	0.0294182	-0.31848	0.590999	0.164984	0.564553	-0.13809						0.0809755	0.264141	0.076251
31.1771	0.113771	0.0464512	-0.202599	0.0372207	0.179364	-0.107957	0.0375792	-0.320761	0.599639	0.15701	0.574769	-0.116282						0.0831839	0.266259	0.0768623
31.2754	0.124921	0.0492298	-0.203023	0.0235478	0.17431	-0.114944	0.0426346	-0.324293	0.605342	0.142999	0.588511	-0.0953785						0.0844881	0.268802	0.0775964
31.3737	0.136097	0.0534979	-0.202055	0.0103593	0.167575	-0.118718	0.0494149	-0.324094	0.612463	0.124238	0.597439	-0.0725316						0.0861404	0.270134	0.077981
31.472	0.147726	0.0557247	-0.199693	0.000107202	0.15475	-0.126869	0.0532485	-0.323861	0.618041	0.107722	0.604407	-0.0511428						0.08668	0.271402	0.0783471
31.5703	0.162021	0.0561652	-0.192772	-0.00815853	0.143521	-0.13908	0.0541071	-0.320947	0.61478	0.0943055	0.608802	-0.0322955						0.086704	0.270929	0.0782104
31.6686	0.17486	0.0621824	-0.1803	-0.0132261	0.128862	-0.152159	0.052494	-0.320177	0.609014	0.075941	0.612749	-0.019176						0.085922	0.270194	0.0779982
31.7669	0.185478	0.0678983	-0.169513	-0.0192307	0.113286	-0.166843	0.0495944	-0.319033	0.601075	0.0543872	0.617189	-0.00643613						0.0839877	0.269814	0.0778886
31.8652	0.197824	0.0719228	-0.156523	-0.0239679	0.0946369	-0.178992	0.0458574	-0.316206	0.595681	0.0338182	0.621028	0.00348963						0.0823809	0.269675	0.0778484
31.9635	0.209372	0.0775602	-0.139162	-0.0280492	0.0737869	-0.18834	0.0422365	-0.314948	0.589403	0.0176845	0.627149	0.0152511						0.0818287	0.269692	0.0778533
32.0618	0.218671	0.0821399	-0.120558	-0.0303397	0.0525185	-0.19648	0.0370079	-0.309504	0.575146	-0.0027954	0.631472	0.0276095						0.0804073	0.267905	0.0773376
32.1602	0.225557	0.0839374	-0.101668	-0.0319336	0.0314331	-0.206424	0.0304654	-0.308765	0.561418	-0.032412	0.635782	0.0384612						0.0771543	0.267651	0.0772642
32.2585	0.229336	0.083612	-0.0795837	-0.0355131	0.0105799	-0.212911	0.0229157	-0.305789	0.547716	-0.0580899	0.639407	0.0483209						0.0741666	0.266957	0.0770638
32.3568	0.23075	0.0870342	-0.0574221	-0.0365678	-0.0080155	-0.21805	0.0184351	-0.301461	0.536376	-0.0791391	0.641083	0.061301						0.0728603	0.266034	0.0767973
32.4551	0.230695	0.0930491	-0.0380185	-0.0407206	-0.0286219	-0.224413	0.0135686	-0.299495	0.523572	-0.0915398	0.641719	0.0735389						0.0711111	0.265374	0.0766069
32.5534	0.229327	0.103596	-0.023367	-0.0430313	-0.0495727	-0.230139	0.00795129	-0.298438	0.507384	-0.106379	0.638653	0.0846078						0.0683828	0.264252	0.0762829
32.6517	0.226887	0.112452	-0.00926005	-0.0431846	-0.0723316	-0.230683	-0.00196628	-0.295477	0.492849	-0.119224	0.63537	0.0979361						0.0661139	0.262961	0.0759102
32.75	0.221324	0.11756	0.00391304	-0.0388891	-0.0944804	-0.22804	-0.0131307	-0.292171	0.476439	-0.123162	0.630722	0.109316						0.0641166	0.260351	0.0751568
32.8483	0.215808	0.121155	0.0169135	-0.0356759	-0.113156	-0.227445	-0.0215797	-0.2935	0.457401	-0.123644	0.620739	0.118647						0.0613053	0.257026	0.0741972
32.9466	0.212818	0.123904	0.0316457	-0.0323043	-0.128136	-0.224452	-0.0299296	-0.29827	0.436941	-0.125171	0.612338	0.126552						0.0588279	0.254194	0.0733796
33.0449	0.211551	0.127085	0.0469061	-0.028669	-0.140003	-0.219269	-0.0394594	-0.297321	0.417438	-0.124661	0.601431	0.130315						0.0571119	0.250153	0.0722129
33.1432	0.209867	0.131153	0.0581304	-0.023026	-0.152487	-0.214155	-0.0466672	-0.292282	0.399691	-0.123478	0.590722	0.127191						0.0553882	0.24583	0.0709651
33.2415	0.205161	0.134662	0.07059	-0.0134333	-0.160299	-0.211944	-0.0503058	-0.287682	0.38562	-0.119721	0.58015	0.126368						0.0549305	0.241638	0.0697549
33.3398	0.199237	0.141782	0.082539	-0.00371846	-0.166829	-0.209594	-0.0538862	-0.282875	0.368465	-0.111794	0.570668	0.128513						0.0552089	0.237201	0.0684741
33.4381	0.192759	0.147368	0.0977425	0.00826786	-0.17059	-0.207259	-0.0582506	-0.280627	0.35128	-0.103918	0.569236	0.129757						0.0563137	0.234468	0.0676852
33.5364	0.185171	0.155895	0.111331	0.0190429	-0.171479	-0.202266	-0.0579345	-0.281021	0.332586	-0.101479	0.568764	0.128186						0.0572331	0.231934	0.0669537
33.6347	0.178289	0.167319	0.121429	0.0261251	-0.172786	-0.192384	-0.0566287	-0.284078	0.318952	-0.0976487	0.57088	0.129324						0.0590661	0.230581	0.066563
33.733	0.17257	0.172862	0.125771	0.0316559	-0.170296	-0.180932	-0.0553217	-0.284834	0.308779	-0.0844071	0.573736	0.134879						0.0620384	0.228411	0.0659366
33.8313	0.167667	0.179699	0.131093	0.0404592	-0.16862	-0.167651	-0.0549763	-0.283327	0.294012	-0.065797	0.573838	0.138872						0.0654392	0.224912	0.0649264
33.9296	0.160982	0.186296	0.131147	0.0481376	-0.1633	-0.156631	-0.0530564	-0.286425	0.277259	-0.0500011	0.567546	0.14254						0.0670412	0.220616	0.0636863
34.0279	0.154719	0.191665	0.125986	0.0569834	-0.15484	-0.145779	-0.052516	-0.289619	0.265631	-0.0354215	0.563089	0.143427						0.0686103	0.216915	0.0626178
34.1262	0.147924	0.19527	0.120801	0.0655197	-0.146094	-0.134859	-0.0507543	-0.296087	0.257713	-0.0222746	0.561196	0.141098						0.0699544	0.21442	0.0618977
34.2245	0.14363	0.200318	0.11874	0.0753289	-0.136094	-0.123963	-0.0498321	-0.299064	0.249535	-0.00191699	0.557816	0.136567						0.0725888	0.211186	0.0609641
34.3228	0.139293	0.206025	0.114317	0.084263	-0.124536	-0.114338	-0.0502288	-0.303111	0.241095	0.0155772	0.555786	0.130262						0.0745337	0.208681	0.0602409
34.4211	0.139195	0.206598	0.106577	0.0890909	-0.115043	-0.104062	-0.0529356	-0.307468	0.22833	0.0312552	0.55571	0.118797						0.0746703	0.206536	0.0596218
34.5194	0.140482	0.205651	0.101045	0.0936676	-0.103249	-0.0946644	-0.054525	-0.308802	0.213308	0.041891	0.554531	0.107371						0.0747255	0.203766	0.0588221
34.6178	0.141616	0.200795	0.0971961	0.0958656	-0.0906257	-0.0868103	-0.054693	-0.308977	0.200956	0.0497244	0.552097	0.0986723						0.0746514	0.200779	0.05796
34.7161	0.142984	0.1963	0.0926197	0.0993026	-0.0751968	-0.08137	-0.0492689	-0.311659	0.190341	0.0557444	0.546753	0.0876251						0.0745147	0.197606	0.0570439
34.8144	0.142175	0.193138	0.0903187	0.100336	-0.057801	-0.0770593	-0.0429111	-0.312621	0.177648	0.061403	0.537769	0.078205						0.0742167	0.193463	0.055848
34.9127	0.140789	0.189039	0.0883683	0.100071	-0.0420696	-0.0703097	-0.0392733	-0.308639	0.162486	0.0667356	0.530372	0.0683802						0.0738291	0.188925	0.0545379
35.011	0.138691	0.18542	0.0837991	0.0989432	-0.0272647	-0.0660706	-0.0352019	-0.303357	0.149015	0.0708523	0.524682	0.0544237						0.0728277	0.184985	0.0534006
35.1093	0.133301	0.1829	0.0770552	0.097205	-0.0121997	-0.063787	-0.0320358	-0.300252	0.134198	0.07307	0.519656	0.0429231						0.0710028	0.181828	0.0524894
35.2076	0.127098	0.180319	0.074472	0.0912632	0.00415033	-0.0632692	-0.0334583	-0.297156	0.123619	0.0743893	0.514207	0.0357542						0.0692824	0.179092	0.0516994
35.3059	0.119547	0.177565	0.0700711	0.0817238	0.0178361	-0.0607156	-0.0363196	-0.292778	0.115892	0.0743714	0.509052	0.0231358						0.0666151	0.176501	0.0509516
35.4042	0.11273	0.172439	0.0637461	0.0714413	0.034135	-0.0554508	-0.0379744	-0.28913	0.113866	0.0759961	0.500012	0.0098088						0.0643016	0.173234	0.0500085
35.5025	0.105629	0.168232	0.0522519	0.0575679	0.0505353	-0.0518742	-0.0403584	-0.286854	0.109221	0.0845781	0.484519	-0.0033777						0.0608391	0.169337	0.0488833
35.6008	0.101143	0.162943	0.0428911	0.0452727	0.0646797	-0.0477148	-0.0459593	-0.283001	0.0991394	0.097879	0.467694	-0.0132338						0.0576444	0.165272	0.04771
35.6991	0.0943853	0.153392	0.0366339	0.03467	0.0794895	-0.045795	-0.0497913	-0.277744	0.0875207	0.107017	0.450613	-0.0233064						0.0539237	0.160943	0.0464603
35.7974	0.0853056	0.14321	0.0307218	0.0243915	0.0927875	-0.0482122	-0.0514774	-0.275669	0.0762296	0.107592	0.433578	-0.0388328						0.0483021	0.15753	0.0454751
35.8957	0.076213	0.129003	0.0230309	0.009404	0.110878	-0.0518947	-0.0536518	-0.277871	0.0657768	0.107016	0.416256	-0.0531255						0.0417528	0.155214	0.0448065
35.994	0.0678027	0.114376	0.0208379	-0.00581675	0.128235	-0.0543254	-0.0575469	-0.276407	0.0540781	0.105564	0.405702	-0.064675						0.0364854	0.153874	0.0444196
36.0923	0.0594359	0.0977086	0.0196076	-0.0213216	0.142756	-0.0577835	-0.0579953	-0.275749	0.0393794	0.102155	0.393453	-0.0753228						0.030527	0.152294	0.0439634
36.1906	0.0535498	0.0820786	0.0162617	-0.036998	0.157572	-0.061731	-0.0630083	-0.272392	0.0220925	0.103727	0.381306	-0.0850719						0.0247822	0.15126	0.0436649
36.2889	0.0480486	0.0643532	0.00936048	-0.0558212	0.168491	-0.0629712	-0.0684185	-0.271829	0.00374141	0.106686	0.36844	-0.0946052						0.0179564	0.150777	0.0435256
36.3872	0.0457543	0.0446361	0.00250431	-0.0708338	0.17442	-0.066964	-0.0698182	-0.269886	-0.0129188	0.110485	0.35432	-0.105086						0.0113844	0.149759	0.0432317
36.4855	0.0406698	0.027725	-0.000681505	-0.0790598	0.179828	-0.0714941	-0.0693755	-0.26739	-0.0273503	0.11507	0.342788	-0.113465						0.00643869	0.148969	0.0430038
36.5838	0.0359947	0.00933506	-0.00484336	-0.0836841	0.181325	-0.0719901	-0.0726315	-0.267943	-0.0392186	0.124992	0.334909	-0.117741						0.0023754	0.149069	0.0430326
36.6821	0.0324301	-0.0090107	-0.00778386	-0.0901603	0.183198	-0.0702701	-0.0759886	-0.268705	-0.051216	0.139289	0.332794	-0.122825						-0.000687372	0.151012	0.0435934
36.7804	0.0284476	-0.027066	-0.00938841	-0.100951	0.183212	-0.0679301	-0.0823318	-0.269517	-0.0596211	0.154347	0.333386	-0.126653						-0.00367228	0.153792	0.0443959
36.8787	0.0296284	-0.0438025	-0.0143523	-0.111442	0.178057	-0.0661873	-0.0879419	-0.270276	-0.0682016	0.165919	0.338633	-0.126742						-0.00639234	0.156715	0.0452398
36.977	0.0341807	-0.0605268	-0.0208173	-0.119021	0.172789	-0.0663523	-0.0901791	-0.271853	-0.0752707	0.177635	0.347553	-0.123713						-0.00796466	0.160282	0.0462694
37.0754	0.0356643	-0.0762741	-0.0287257	-0.126298	0.166191	-0.0658251	-0.0935051	-0.274412	-0.0821085	0.192744	0.355382	-0.117391						-0.0095465	0.163997	0.0473418
37.1737	0.0389722	-0.092954	-0.0361007	-0.132328	0.159615	-0.0628272	-0.0951491	-0.277922	-0.0886201	0.21053	0.36613	-0.113974						-0.0103856	0.168971	0.0487777
37.272	0.0440439	-0.111499	-0.0449949	-0.135839	0.15363	-0.0550086	-0.094094	-0.283371	-0.0967281	0.23027	0.378098	-0.112363						-0.0106547	0.174936	0.0504997
37.3703	0.0516441	-0.128641	-0.0514903	-0.137555	0.149249	-0.0465352	-0.0925765	-0.290059	-0.110268	0.248924	0.39148	-0.106877						-0.0102254	0.18154	0.052406
37.4686	0.0581125	-0.145212	-0.055359	-0.136895	0.143712	-0.0424908	-0.0911128	-0.298399	-0.127679	0.262835	0.405222	-0.104841						-0.0110089	0.188237	0.0543392
37.5669	0.0662158	-0.162584	-0.0558549	-0.134862	0.136641	-0.0360008	-0.0884016	-0.304716	-0.137755	0.271134	0.421436	-0.103034						-0.0106484	0.194103	0.0560328
37.6652	0.070975	-0.181459	-0.0582328	-0.1359	0.133336	-0.031611	-0.0873125	-0.306859	-0.132781	0.278818	0.440565	-0.100511						-0.00924782	0.199777	0.0576707
37.7635	0.0764383	-0.198268	-0.0624718	-0.13633	0.128975	-0.0289425	-0.0898569	-0.306714	-0.126357	0.28391	0.457527	-0.0993482						-0.00845319	0.204568	0.0590537
37.8618	0.0856575	-0.210415	-0.0640464	-0.136444	0.12753	-0.0187165	-0.0899796	-0.305735	-0.123084	0.290498	0.475591	-0.0945679						-0.0053093	0.209532	0.0604867
37.9601	0.0962338	-0.218937	-0.0637726	-0.131652	0.122999	-0.0068002	-0.0885953	-0.302881	-0.117663	0.29205	0.495764	-0.0897391						-0.00108279	0.213369	0.0615942
38.0584	0.104556	-0.225409	-0.0677513	-0.125398	0.118046	0.0067866	-0.0881329	-0.298156	-0.110885	0.297139	0.514987	-0.0835871						0.00351625	0.217052	0.0626575
38.1567	0.114483	-0.229623	-0.0716402	-0.118871	0.116435	0.0198451	-0.0877295	-0.292018	-0.105558	0.308187	0.535291	-0.0749326						0.00948909	0.221587	0.0639667
38.255	0.121076	-0.23242	-0.0733432	-0.111939	0.115164	0.0304727	-0.0821919	-0.287694	-0.0982321	0.312933	0.55391	-0.0643189						0.0152847	0.224727	0.0648732
38.3533	0.125747	-0.231379	-0.0718925	-0.103376	0.115314	0.0388188	-0.0755871	-0.282286	-0.0876418	0.309884	0.576293	-0.0500789						0.0219847	0.226925	0.0655075
38.4516	0.130342	-0.227483	-0.0693374	-0.0952453	0.117521	0.0517213	-0.0711227	-0.27805	-0.0780503	0.306493	0.600568	-0.0333958						0.0294967	0.229648	0.0662937
38.5499	0.137071	-0.223396	-0.0680102	-0.0917055	0.120156	0.0624795	-0.0691663	-0.274489	-0.0702716	0.306316	0.617871	-0.0163486						0.0358756	0.23194	0.0669553
38.6482	0.143216	-0.214998	-0.0647596	-0.0922232	0.12655	0.0704491	-0.0623053	-0.268853	-0.0597595	0.298591	0.632746	-0.00316185						0.0421243	0.232449	0.0671021
38.7465	0.147418	-0.203795	-0.0616976	-0.0895269	0.133287	0.0780042	-0.0564559	-0.264068	-0.048039	0.288502	0.644351	0.00620283						0.0478485	0.231867	0.0669343
38.8448	0.152403	-0.189175	-0.0585168	-0.0836196	0.13921	0.0826549	-0.0490973	-0.256622	-0.0411172	0.280609	0.658106	0.0146632						0.0541248	0.231391	0.0667969
38.9431	0.15356	-0.174794	-0.0532011	-0.0784819	0.149361	0.0882458	-0.0435385	-0.254725	-0.0270694	0.273177	0.669974	0.0182424						0.0600625	0.231168	0.0667325
39.0414	0.151287	-0.160349	-0.0453967	-0.0736118	0.160944	0.0926427	-0.0414339	-0.255386	-0.00753561	0.26215	0.675059	0.0195636						0.0648277	0.229481	0.0662454
39.1397	0.155196	-0.147567	-0.0345245	-0.0696732	0.175637	0.0971639	-0.0383983	-0.254621	0.013661	0.247639	0.679115	0.0187564						0.0701987	0.227748	0.0657452
39.238	0.163277	-0.13404	-0.0231099	-0.067165	0.190531	0.100499	-0.0361428	-0.250861	0.035524	0.228835	0.681308	0.0190039						0.0756383	0.22543	0.0650762
39.3363	0.172599	-0.117041	-0.012467	-0.0664723	0.205103	0.0990287	-0.0361272	-0.244433	0.0610339	0.20515	0.681137	0.0187235						0.0805196	0.222355	0.0641883
39.4346	0.183525	-0.10104	-0.00521761	-0.0631701	0.218653	0.0942122	-0.0380225	-0.238786	0.0912204	0.181853	0.678011	0.0161558						0.0847828	0.219498	0.0633636
39.533	0.193901	-0.085857	1.50226e-05	-0.0612879	0.22879	0.0932725	-0.0408758	-0.229552	0.120624	0.159301	0.678555	0.0155026						0.0893658	0.217735	0.0628548
39.6313	0.203855	-0.0677467	0.00490557	-0.0583867	0.237999	0.0902498	-0.0461262	-0.218281	0.14471	0.13449	0.678437	0.0140306						0.093178	0.21592	0.0623308
39.7296	0.215123	-0.0480326	0.0101711	-0.0509598	0.244985	0.0869675	-0.0491449	-0.213822	0.158786	0.113159	0.678664	0.00688579						0.0960652	0.215041	0.0620769
39.8279	0.224711	-0.0265675	0.016027	-0.043084	0.251083	0.0875979	-0.0524894	-0.210009	0.172235	0.101269	0.679106	0.00133486						0.100101	0.214428	0.0619001
39.9262	0.232035	-0.00834465	0.021522	-0.0359549	0.251849	0.0819446	-0.0607785	-0.20355	0.189205	0.0897518	0.676211	-0.00626677						0.102302	0.213405	0.0616048
40.0245	0.238048	0.0103765	0.0272879	-0.0321053	0.251996	0.07214	-0.0673537	-0.196437	0.205759	0.0874968	0.67339	-0.0148977						0.104642	0.212652	0.0613873
40.1228	0.247606	0.0292599	0.0346458	-0.0300895	0.250267	0.0585635	-0.0750203	-0.193106	0.22446	0.0815038	0.670431	-0.0293541						0.105764	0.213382	0.0615981
40.2211	0.254443	0.0501834	0.0443568	-0.0283405	0.247357	0.0472321	-0.0835426	-0.189308	0.244612	0.0666656	0.667343	-0.0470571						0.106162	0.214643	0.0619621
40.3194	0.264683	0.0707742	0.0541551	-0.0260608	0.244008	0.0376786	-0.0945012	-0.185394	0.26589	0.0559393	0.663795	-0.0661417						0.107069	0.216833	0.0625943
40.4177	0.277037	0.0898566	0.0625655	-0.0219835	0.241095	0.0272584	-0.107525	-0.179156	0.288498	0.0546905	0.660332	-0.0885451						0.108677	0.219872	0.0634715
40.516	0.285904	0.110123	0.0699283	-0.0186518	0.241204	0.0132812	-0.120492	-0.173949	0.311741	0.0510496	0.656055	-0.111801						0.109533	0.223787	0.0646016
40.6143	0.294064	0.129464	0.0735298	-0.0111866	0.239373	0.00193013	-0.130453	-0.170987	0.335998	0.0420275	0.655977	-0.137372						0.110197	0.229209	0.0661669
40.7126	0.300421	0.14482	0.0742298	-0.00199747	0.233963	-0.0107445	-0.143702	-0.170131	0.360208	0.0367411	0.654106	-0.161945						0.109664	0.234886	0.0678056
40.8109	0.307041	0.160254	0.0741963	0.00637784	0.227686	-0.0268561	-0.159446	-0.16742	0.380238	0.027085	0.651142	-0.180559						0.108311	0.24025	0.0693542
40.9092	0.315313	0.171102	0.0712185	0.0133892	0.223162	-0.039719	-0.175735	-0.164415	0.401858	0.0163093	0.645423	-0.196891						0.106751	0.245558	0.0708865
41.0075	0.325474	0.182726	0.0668993	0.0217135	0.215094	-0.053106	-0.189318	-0.154349	0.415737	0.00686413	0.640903	-0.211482						0.105596	0.249596	0.0720522
41.1058	0.337838	0.195233	0.0621411	0.0290873	0.201449	-0.064601	-0.200078	-0.140886	0.423967	-0.00293597	0.639525	-0.224591						0.104679	0.253195	0.073091
41.2041	0.346834	0.20987	0.0576136	0.0400722	0.184057	-0.0765569	-0.211584	-0.128237	0.431554	-0.01109	0.642533	-0.235623						0.10412	0.257367	0.0742954
41.3024	0.349467	0.222718	0.0529069	0.0525422	0.16689	-0.0884446	-0.22279	-0.118496	0.433194	-0.0186163	0.645881	-0.242897						0.102696	0.260488	0.0751964
41.4007	0.350717	0.234807	0.0483959	0.0656085	0.147117	-0.0998523	-0.229316	-0.107452	0.431707	-0.0253605	0.647891	-0.2487						0.101297	0.262365	0.0757382
41.499	0.348658	0.247615	0.0472441	0.0755364	0.128547	-0.109783	-0.232784	-0.0952279	0.428553	-0.031169	0.653897	-0.255485						0.100467	0.264419	0.0763311
41.5973	0.350386	0.263249	0.0447	0.0854481	0.110695	-0.121552	-0.238328	-0.0848464	0.425154	-0.0337433	0.657962	-0.263123						0.0996669	0.267276	0.077156
41.6956	0.352513	0.275314	0.0423236	0.0935254	0.0946555	-0.132651	-0.238554	-0.0779115	0.423809	-0.0262496	0.661832	-0.267324						0.100107	0.269206	0.0777132
41.7939	0.355308	0.285741	0.0399368	0.0990819	0.081891	-0.141506	-0.237696	-0.0703005	0.422745	-0.0266442	0.660383	-0.267086						0.100154	0.269872	0.0779052
41.8922	0.362855	0.292974	0.0345056	0.103018	0.0720302	-0.150726	-0.233829	-0.0666915	0.42374	-0.0350339	0.661846	-0.267008						0.0998067	0.271862	0.0784799
41.9906	0.371389	0.301951	0.0264878	0.107968	0.0645337	-0.156289	-0.228635	-0.0654424	0.423987	-0.0399953	0.667121	-0.26422						0.100738	0.274022	0.0791035
42.0889	0.379545	0.30833	0.0163666	0.113743	0.0569492	-0.160113	-0.22642	-0.0671733	0.422295	-0.0528276	0.672472	-0.259035						0.100344	0.276375	0.0797826
42.1872	0.385091	0.312417	0.00435903	0.122749	0.0493204	-0.163848	-0.223504	-0.0679992	0.417906	-0.059033	0.676493	-0.2491						0.100404	0.277142	0.0800041
42.2855	0.392805	0.311824	-0.0103666	0.131394	0.0407259	-0.170181	-0.223135	-0.0688652	0.412017	-0.0581911	0.679862	-0.238858						0.0999192	0.277887	0.0802192
42.3838	0.399593	0.309411	-0.0251383	0.137083	0.0328595	-0.175886	-0.224282	-0.070233	0.402404	-0.0563708	0.686316	-0.229841						0.0988262	0.278963	0.0805298
42.4821	0.405361	0.304315	-0.0405677	0.138816	0.0234037	-0.179299	-0.222904	-0.0750076	0.384286	-0.0597175	0.688973	-0.218264						0.095783	0.278287	0.0803344
42.5804	0.414304	0.29544	-0.0570222	0.139371	0.0120507	-0.182476	-0.222776	-0.0779167	0.363421	-0.0652355	0.686765	-0.205504						0.0917018	0.276895	0.0799327
42.6787	0.418671	0.288439	-0.0715091	0.13444	0.0044876	-0.187976	-0.223798	-0.079208	0.342757	-0.063478	0.684585	-0.191139						0.0880227	0.274941	0.0793687
42.777	0.424587	0.282132	-0.0837931	0.129745	-0.00165726	-0.191766	-0.223636	-0.0795389	0.313726	-0.0593079	0.686722	-0.176968						0.0850203	0.273092	0.0788348
42.8753	0.433344	0.273036	-0.0953215	0.125004	-0.00900438	-0.191858	-0.217906	-0.0807705	0.288569	-0.0478773	0.689058	-0.166675						0.0832998	0.271236	0.078299
42.9736	0.438325	0.266054	-0.103795	0.120234	-0.0174297	-0.193961	-0.210544	-0.0852387	0.260622	-0.0351278	0.692954	-0.159701						0.0810326	0.269832	0.0778939
43.0719	0.442326	0.256688	-0.111329	0.113663	-0.0198466	-0.196573	-0.205313	-0.0937437	0.231903	-0.0207805	0.696949	-0.153352						0.0783826	0.268727	0.0775748
43.1702	0.44351	0.247634	-0.122887	0.105996	-0.0157208	-0.197571	-0.200886	-0.104713	0.205297	-0.00280494	0.701073	-0.148342						0.075882	0.267944	0.0773488
43.2685	0.445326	0.234614	-0.138046	0.0946307	-0.0088966	-0.199161	-0.196769	-0.117699	0.178223	0.0141233	0.699731	-0.146341						0.0716446	0.266941	0.0770593
43.3668	0.450648	0.223491	-0.152687	0.0814778	-0.00586065	-0.201877	-0.194562	-0.129922	0.156543	0.0332698	0.696787	-0.149568						0.0673115	0.267337	0.0771737
43.4651	0.45346	0.211781	-0.166293	0.0696254	-0.000964342	-0.20214	-0.197618	-0.145444	0.131542	0.0581739	0.697477	-0.154012						0.0629657	0.268848	0.0776098
43.5634	0.456858	0.198072	-0.182071	0.0576231	0.0026895	-0.200733	-0.20364	-0.16176	0.105099	0.0832394	0.692694	-0.155925						0.0576788	0.269961	0.0779311
43.6617	0.456736	0.181553	-0.193473	0.0452446	0.00816343	-0.199894	-0.203581	-0.177033	0.079235	0.105089	0.687789	-0.155678						0.0528457	0.270024	0.0779493
43.76	0.455985	0.167025	-0.203631	0.0342	0.0116595	-0.198811	-0.207527	-0.190927	0.0506428	0.120259	0.684332	-0.15989						0.0469432	0.271123	0.0782666
43.8583	0.454877	0.154231	-0.213713	0.0218532	0.0118559	-0.200136	-0.213947	-0.202483	0.0248353	0.140023	0.684695	-0.164822						0.0414391	0.273771	0.079031
43.9566	0.449158	0.144467	-0.219536	0.00884947	0.00961077	-0.203559	-0.219536	-0.21047	-0.00161969	0.165172	0.684425	-0.171889						0.0362562	0.276044	0.0796871
44.0549	0.442282	0.135805	-0.222896	-0.00508202	0.009039	-0.207785	-0.225314	-0.217679	-0.0302436	0.183319	0.681585	-0.177567						0.0304553	0.277586	0.0801323
44.1532	0.437205	0.129681	-0.223682	-0.0186084	0.0113022	-0.210554	-0.23017	-0.223317	-0.0548369	0.202562	0.681222	-0.184269						0.0263779	0.279786	0.0807672
44.2515	0.434069	0.125148	-0.221029	-0.0345806	0.0178598	-0.209578	-0.230973	-0.225594	-0.0814099	0.218911	0.684314	-0.193497						0.0236368	0.28228	0.0814872
44.3498	0.426896	0.124778	-0.215188	-0.0508411	0.0264586	-0.207509	-0.227086	-0.228883	-0.104253	0.23005	0.684388	-0.200604						0.0215172	0.283031	0.0817041
44.4482	0.419962	0.126049	-0.211427	-0.0647328	0.0323182	-0.207468	-0.219376	-0.230751	-0.122601	0.242101	0.683586	-0.20309						0.0203808	0.283402	0.0818112
44.5465	0.411542	0.132405	-0.207268	-0.0747415	0.0399717	-0.207552	-0.211694	-0.231362	-0.133122	0.25529	0.687492	-0.207376						0.0211322	0.284553	0.0821435
44.6448	0.401383	0.141386	-0.200569	-0.0842822	0.047635	-0.204337	-0.203771	-0.232721	-0.14191	0.27037	0.697117	-0.209864						0.0233698	0.286478	0.0826989
44.7431	0.398382	0.148382	-0.191026	-0.0919821	0.0549229	-0.199447	-0.196153	-0.231697	-0.151172	0.28018	0.707083	-0.212189						0.0262738	0.288486	0.0832789
44.8414	0.395188	0.157067	-0.182819	-0.0981031	0.0637212	-0.192759	-0.185788	-0.229732	-0.155017	0.288051	0.716609	-0.215327						0.0300908	0.28989	0.083684
44.9397	0.389662	0.168403	-0.174588	-0.104199	0.0755869	-0.187461	-0.18009	-0.227246	-0.156068	0.293099	0.727357	-0.215955						0.0340417	0.291334	0.0841008
45.038	0.389329	0.177708	-0.165296	-0.111668	0.0882466	-0.18073	-0.178492	-0.225633	-0.152508	0.294397	0.735087	-0.215061						0.0379483	0.292322	0.084386
45.1363	0.390601	0.186667	-0.157518	-0.116151	0.0964818	-0.174218	-0.176628	-0.223201	-0.144248	0.290517	0.738409	-0.21555						0.0412634	0.291959	0.0842812
45.2346	0.395624	0.194427	-0.14557	-0.118156	0.102466	-0.169041	-0.175105	-0.218944	-0.13783	0.289505	0.741145	-0.215896						0.0452188	0.291737	0.0842172
45.3329	0.398077	0.20808	-0.130964	-0.119077	0.108676	-0.163129	-0.17074	-0.212108	-0.13537	0.291885	0.745365	-0.21396						0.0505613	0.291526	0.0841563
45.4312	0.397847	0.224153	-0.115254	-0.117241	0.119769	-0.158928	-0.165629	-0.204681	-0.135816	0.290499	0.750623	-0.210736						0.0562173	0.291153	0.0840487
45.5295	0.403161	0.239979	-0.0973144	-0.115776	0.129835	-0.15559	-0.158693	-0.200313	-0.13506	0.286539	0.753853	-0.206192						0.0620358	0.290739	0.0839291
45.6278	0.410266	0.256587	-0.0784854	-0.113206	0.142613	-0.155565	-0.147546	-0.198003	-0.137527	0.278681	0.763301	-0.201209						0.0683256	0.291878	0.0842579
45.7261	0.419065	0.274913	-0.0595017	-0.108568	0.153681	-0.155138	-0.140693	-0.198101	-0.13871	0.273974	0.770182	-0.197075						0.0745024	0.293394	0.0846955
45.8244	0.428326	0.288243	-0.0429177	-0.103058	0.165275	-0.152946	-0.13567	-0.197899	-0.140678	0.268363	0.773384	-0.189687						0.0800612	0.293866	0.0848317
45.9227	0.438801	0.297237	-0.0254817	-0.0946507	0.179123	-0.150171	-0.130342	-0.195851	-0.145532	0.258277	0.775164	-0.18236						0.0853511	0.293696	0.0847828
46.021	0.451438	0.303867	-0.0103233	-0.0806664	0.193572	-0.149162	-0.126701	-0.197034	-0.155379	0.244748	0.775564	-0.174942						0.0895819	0.293994	0.0848687
46.1193	0.463971	0.307283	0.00413031	-0.0649866	0.206676	-0.151483	-0.120103	-0.19764	-0.164559	0.237368	0.77448	-0.170672						0.0937052	0.294404	0.0849871
46.2176	0.476179	0.30796	0.0164511	-0.0483546	0.220299	-0.15373	-0.114058	-0.19689	-0.177126	0.231962	0.766882	-0.166823						0.0968959	0.293909	0.0848441
46.3159	0.487109	0.306963	0.0257428	-0.0308013	0.232726	-0.158338	-0.111062	-0.202252	-0.187296	0.223596	0.75425	-0.163133						0.0981253	0.293062	0.0845997
46.4142	0.503486	0.304047	0.0317504	-0.0137784	0.243604	-0.162057	-0.111484	-0.207851	-0.202898	0.218002	0.74677	-0.159049						0.0992118	0.294663	0.0850619
46.5125	0.51598	0.302494	0.0403947	0.00379242	0.257286	-0.162137	-0.112871	-0.217076	-0.220215	0.20594	0.735269	-0.158102						0.0992295	0.295817	0.0853951
46.6108	0.530585	0.295764	0.048555	0.021296	0.271792	-0.166576	-0.111454	-0.227722	-0.240563	0.192321	0.721092	-0.155599						0.0982909	0.297323	0.0858299
46.7091	0.545434	0.289169	0.0547342	0.0401316	0.285874	-0.174243	-0.107783	-0.236676	-0.258875	0.182695	0.70525	-0.157296						0.0973679	0.299192	0.0863692
46.8074	0.555963	0.282268	0.0613669	0.0604422	0.29767	-0.182566	-0.104496	-0.249781	-0.273341	0.170458	0.690517	-0.158234						0.0958557	0.300943	0.0868748
46.9058	0.565017	0.272181	0.0685846	0.0795741	0.309857	-0.193821	-0.107039	-0.263448	-0.285757	0.156263	0.674368	-0.159933						0.0929871	0.302967	0.0874591
47.0041	0.573368	0.258684	0.0725219	0.10031	0.318592	-0.200808	-0.10773	-0.275692	-0.306768	0.143097	0.65844	-0.162833						0.0892652	0.30543	0.08817
47.1024	0.5773	0.245391	0.0753004	0.124713	0.325399	-0.206887	-0.103274	-0.284501	-0.33065	0.133033	0.648522	-0.16196						0.0868654	0.307991	0.0889093
47.2007	0.578466	0.234719	0.0813822	0.147125	0.333957	-0.213754	-0.0971362	-0.294005	-0.360632	0.127854	0.642493	-0.156528						0.0853284	0.311904	0.0900388
47.299	0.577638	0.227083	0.0853506	0.167821	0.342365	-0.220679	-0.0927519	-0.304146	-0.393456	0.115514	0.637056	-0.151795						0.0825	0.316631	0.0914034
47.3973	0.578956	0.214113	0.0895396	0.187872	0.347874	-0.2274	-0.0930604	-0.311702	-0.424617	0.0981429	0.631413	-0.149385						0.0784788	0.321444	0.092793
47.4956	0.583257	0.196354	0.0904445	0.20534	0.351205	-0.227862	-0.0923827	-0.320143	-0.452802	0.0864419	0.625663	-0.147262						0.0748545	0.325805	0.0940517
47.5939	0.581592	0.179211	0.0855895	0.220386	0.355312	-0.227557	-0.091008	-0.321875	-0.478442	0.076899	0.622116	-0.147125						0.0712582	0.328981	0.0949685
47.6922	0.577973	0.163749	0.0811014	0.232717	0.357098	-0.224539	-0.0959747	-0.318694	-0.498415	0.0721226	0.614732	-0.14966						0.0676842	0.33031	0.0953521
47.7905	0.572463	0.144811	0.0689123	0.242948	0.360211	-0.220423	-0.0999897	-0.314004	-0.521557	0.0651694	0.613405	-0.150819						0.0634273	0.332465	0.0959744
47.8888	0.564746	0.133061	0.054196	0.252975	0.36537	-0.21947	-0.101414	-0.310617	-0.541974	0.0601952	0.616191	-0.150804						0.0602047	0.335199	0.0967637
47.9871	0.554996	0.128276	0.0390914	0.261143	0.369799	-0.216043	-0.101534	-0.310835	-0.55632	0.0582564	0.620161	-0.152059						0.057911	0.337258	0.097358
48.0854	0.545743	0.122982	0.0253151	0.262682	0.373514	-0.210114	-0.0991709	-0.307403	-0.566034	0.0565327	0.625881	-0.149867						0.0566716	0.337865	0.0975332
48.1837	0.537684	0.120044	0.0118104	0.261216	0.375744	-0.198644	-0.100686	-0.303566	-0.580017	0.0532044	0.637234	-0.146939						0.0555904	0.339687	0.0980592
48.282	0.526165	0.118508	0.00127602	0.259426	0.374839	-0.187282	-0.101927	-0.300098	-0.592571	0.0474021	0.650811	-0.142067						0.0545402	0.341034	0.0984482
48.3803	0.513662	0.118977	-0.00650657	0.256209	0.371064	-0.175205	-0.101452	-0.29228	-0.602548	0.044105	0.668521	-0.136166						0.054865	0.341827	0.0986768
48.4786	0.496646	0.119356	-0.0137174	0.254091	0.365313	-0.160874	-0.101424	-0.283507	-0.609511	0.0417597	0.68218	-0.133199						0.0547595	0.34108	0.0984613
48.5769	0.483291	0.116014	-0.0218348	0.250089	0.359879	-0.149562	-0.101239	-0.270067	-0.617056	0.0489176	0.698931	-0.130034						0.0556108	0.341147	0.0984805
48.6752	0.466819	0.115021	-0.0268743	0.243982	0.352846	-0.135237	-0.105106	-0.252976	-0.625951	0.0583218	0.71321	-0.128255						0.0563167	0.340528	0.0983018
48.7735	0.448277	0.110114	-0.0308225	0.236595	0.345585	-0.118044	-0.113999	-0.238806	-0.641962	0.0674227	0.728423	-0.124921						0.0556552	0.341454	0.0985692
48.8718	0.431979	0.104257	-0.0375935	0.228472	0.338092	-0.098583	-0.12227	-0.219751	-0.664382	0.0814118	0.738606	-0.122714						0.0547938	0.342899	0.0989863
48.9701	0.419251	0.0997288	-0.0442059	0.219232	0.327884	-0.0782715	-0.12567	-0.201405	-0.691643	0.0976117	0.746204	-0.119897						0.0540682	0.345174	0.0996431
49.0684	0.40861	0.0982982	-0.0478824	0.208078	0.31845	-0.0655139	-0.130527	-0.185511	-0.714601	0.11471	0.752169	-0.116723						0.0532965	0.347428	0.100294
49.1667	0.3983	0.0988197	-0.0508305	0.194569	0.31066	-0.0538889	-0.139046	-0.17138	-0.737685	0.133849	0.752188	-0.118417						0.0514281	0.349658	0.100938
49.265	0.388874	0.0960865	-0.0569194	0.181507	0.301544	-0.036235	-0.147942	-0.156673	-0.751294	0.152126	0.749562	-0.122739						0.0498248	0.350002	0.101037
49.3634	0.379647	0.0884742	-0.0609078	0.167536	0.291243	-0.0162001	-0.154216	-0.143722	-0.758292	0.17378	0.746691	-0.125339						0.049058	0.349147	0.10079
49.4617	0.369185	0.0854124	-0.067953	0.155031	0.283713	0.00209851	-0.157585	-0.135702	-0.758525	0.198304	0.745365	-0.123463						0.0496568	0.347838	0.100412
49.56	0.357725	0.0849328	-0.0743258	0.144977	0.275821	0.0165189	-0.158999	-0.125352	-0.755321	0.217094	0.746857	-0.118433						0.050958	0.346093	0.0999086
49.6583	0.348171	0.0840807	-0.0752282	0.137321	0.268414	0.0286125	-0.159881	-0.119311	-0.754848	0.23087	0.746584	-0.10972						0.0520887	0.344654	0.099493
49.7566	0.34102	0.0812723	-0.077171	0.133427	0.259908	0.0405328	-0.156731	-0.117859	-0.749887	0.24038	0.746779	-0.0997993						0.0534891	0.342506	0.098873
49.8549	0.334797	0.0813727	-0.0709027	0.130736	0.251515	0.0513236	-0.15163	-0.116652	-0.741083	0.250365	0.742874	-0.0949336						0.0556485	0.338984	0.0978563
49.9532	0.328497	0.076094	-0.0597286	0.126154	0.240997	0.0621667	-0.145072	-0.112962	-0.735254	0.259977	0.738527	-0.0932556						0.0571783	0.335659	0.0968965
50.0515	0.322416	0.0655649	-0.0503289	0.120722	0.228679	0.0722668	-0.139277	-0.106098	-0.736495	0.273941	0.734873	-0.0853751						0.0584074	0.33384	0.0963712
50.1498	0.314055	0.057683	-0.042619	0.118099	0.216829	0.0834036	-0.137429	-0.100623	-0.738096	0.293089	0.727304	-0.0793701						0.0593604	0.332212	0.0959014
50.2481	0.301918	0.0493797	-0.03661	0.117395	0.206644	0.0920402	-0.132893	-0.0974617	-0.734199	0.31279	0.712152	-0.0723824						0.0598977	0.328288	0.0947687
50.3464	0.293286	0.0404158	-0.0338209	0.113772	0.19864	0.0985622	-0.127239	-0.0949532	-0.729502	0.335642	0.699128	-0.0701632						0.060314	0.325448	0.0939486
50.4447	0.28577	0.0315521	-0.0313331	0.110355	0.192736	0.100334	-0.122297	-0.0954225	-0.727842	0.357517	0.683866	-0.0682676						0.0597474	0.323286	0.0933246
50.543	0.282233	0.0225968	-0.0288008	0.108447	0.189227	0.0957683	-0.115353	-0.09685	-0.725944	0.378181	0.672505	-0.0661386						0.0596561	0.322021	0.0929594
50.6413	0.279221	0.0172954	-0.0270043	0.108374	0.183032	0.0925944	-0.112763	-0.0975183	-0.718163	0.390378	0.662991	-0.0650945						0.0594453	0.31945	0.0922173
50.7396	0.279176	0.0123351	-0.0303612	0.107748	0.177068	0.0925633	-0.108309	-0.100095	-0.707678	0.402499	0.655149	-0.0636948						0.0596999	0.316967	0.0915004
50.8379	0.283867	0.00989827	-0.0359732	0.10802	0.171825	0.0925622	-0.0973505	-0.100101	-0.693198	0.414508	0.644223	-0.0619667						0.0613595	0.313216	0.0904178
50.9362	0.286894	0.00926922	-0.0403316	0.107229	0.16764	0.0890662	-0.0884775	-0.10353	-0.67165	0.4272	0.638191	-0.0567421						0.0637298	0.308961	0.0891894
51.0345	0.288185	0.00931924	-0.0448176	0.10679	0.164069	0.0853392	-0.0804533	-0.105402	-0.642039	0.438683	0.634538	-0.04871						0.0671252	0.303306	0.0875569
51.1328	0.286921	0.00956518	-0.0488012	0.106796	0.161887	0.0852222	-0.0719221	-0.109545	-0.610376	0.447748	0.633053	-0.0410958						0.0707877	0.297517	0.0858858
51.2311	0.287309	0.00826962	-0.0540166	0.106095	0.160038	0.0834378	-0.0623028	-0.113586	-0.578893	0.450181	0.632781	-0.0321078						0.0739338	0.291515	0.0841532
51.3294	0.289453	0.0105547	-0.0576176	0.103808	0.159587	0.0735968	-0.0550162	-0.117979	-0.552907	0.449246	0.6365	-0.0255961						0.0761358	0.287167	0.0828978
51.4277	0.289769	0.016328	-0.0620792	0.10287	0.16085	0.0596016	-0.0486262	-0.122163	-0.53027	0.448339	0.641957	-0.0194471						0.0780942	0.283854	0.0819417
51.526	0.291837	0.0181166	-0.0628073	0.102093	0.160896	0.0503258	-0.0428681	-0.125862	-0.512954	0.445365	0.645951	-0.0152719						0.0795683	0.28121	0.0811783
51.6243	0.292506	0.0179473	-0.0610214	0.101389	0.163152	0.0392087	-0.0399999	-0.135123	-0.500151	0.447608	0.647531	-0.0151451						0.079825	0.280099	0.0808576
51.7226	0.294921	0.0170168	-0.0619625	0.101297	0.164701	0.0279357	-0.0386838	-0.144956	-0.489011	0.451373	0.649399	-0.0145694						0.0797884	0.279909	0.0808028
51.821	0.294494	0.0179648	-0.0624041	0.0996083	0.16766	0.0163966	-0.0397548	-0.151933	-0.490274	0.455268	0.648588	-0.0114962						0.0786764	0.281079	0.0811405
51.9193	0.295063	0.0183146	-0.0654627	0.0972983	0.1725	0.00432526	-0.0434832	-0.158347	-0.493632	0.45993	0.645743	-0.00572342						0.0772106	0.282633	0.0815891
52.0176	0.298315	0.0208177	-0.0708885	0.0959498	0.177674	-0.00522309	-0.0485964	-0.167541	-0.495358	0.464565	0.64135	-0.000470585						0.0758829	0.284182	0.0820364
52.1159	0.302339	0.0276598	-0.0726924	0.0937493	0.182802	-0.0152146	-0.0551633	-0.177881	-0.494236	0.462448	0.635525	-0.00159004						0.0739789	0.284448	0.082113
52.2142	0.308784	0.0328709	-0.0725513	0.0900932	0.187518	-0.026584	-0.0614327	-0.190271	-0.495122	0.454919	0.632801	-0.00416643						0.0714048	0.285339	0.0823704
52.3125	0.319056	0.0376345	-0.0700984	0.0866168	0.191135	-0.039029	-0.0698477	-0.200509	-0.496606	0.446306	0.634605	-0.009039						0.0691853	0.287219	0.0829131
52.4108	0.329593	0.0451722	-0.0649714	0.0870793	0.191713	-0.0490439	-0.0800353	-0.208922	-0.49733	0.439044	0.63494	-0.0131588						0.06784	0.288658	0.0833283
52.5091	0.341222	0.0505368	-0.06098	0.0882596	0.190312	-0.0526371	-0.0922492	-0.21376	-0.498526	0.429023	0.633698	-0.0139619						0.0667447	0.289336	0.0835242
52.6074	0.348396	0.055364	-0.0550022	0.0877019	0.189725	-0.0520749	-0.106085	-0.216343	-0.498741	0.419593	0.628085	-0.0115683						0.0657542	0.288599	0.0833112
52.7057	0.354025	0.0569152	-0.0458444	0.0859227	0.190075	-0.0519183	-0.115591	-0.224547	-0.508126	0.412056	0.618512	-0.00882471						0.0635545	0.289081	0.0834504
52.804	0.360209	0.0586726	-0.0317061	0.0866947	0.189152	-0.053317	-0.12866	-0.235473	-0.516345	0.403193	0.609549	-0.00756694						0.0612003	0.289853	0.0836733
52.9023	0.364102	0.0599628	-0.0135673	0.0870461	0.189521	-0.0595746	-0.146273	-0.250216	-0.521682	0.392218	0.601456	-0.00830649						0.0578906	0.29083	0.0839555
53.0006	0.368925	0.0617196	0.00363738	0.0882556	0.192502	-0.0637644	-0.161274	-0.264012	-0.532578	0.374312	0.590031	-0.0132201						0.0537112	0.291832	0.0842447
53.0989	0.371249	0.0639199	0.0198278	0.0919416	0.197122	-0.067587	-0.178677	-0.278484	-0.55045	0.357761	0.580697	-0.0221224						0.0487665	0.294931	0.0851392
53.1972	0.373119	0.0633094	0.0341623	0.0958161	0.200918	-0.0704317	-0.195637	-0.288338	-0.570755	0.340672	0.57159	-0.0310848						0.0436117	0.298188	0.0860794
53.2955	0.37446	0.0644523	0.0460755	0.101184	0.203617	-0.0690971	-0.212669	-0.299989	-0.592841	0.327149	0.564722	-0.0369811						0.0391735	0.302564	0.0873428
53.3938	0.373147	0.0637399	0.057881	0.110561	0.205165	-0.0664579	-0.229001	-0.307487	-0.613563	0.315918	0.555576	-0.03863						0.0355707	0.305997	0.0883338
53.4921	0.374522	0.0598385	0.0678478	0.120722	0.207846	-0.0623083	-0.245403	-0.311061	-0.635373	0.301343	0.544988	-0.0428436						0.0316765	0.309354	0.0893029
53.5904	0.374625	0.057791	0.0760219	0.128197	0.209969	-0.0629517	-0.262041	-0.312641	-0.661676	0.28872	0.535918	-0.0487399						0.0269326	0.313902	0.0906156
53.6887	0.376682	0.0567637	0.0841069	0.131476	0.210006	-0.0617432	-0.279901	-0.309486	-0.68438	0.26878	0.528348	-0.0513524						0.0224417	0.317264	0.0915862
53.787	0.376101	0.0560266	0.0931394	0.134306	0.210529	-0.0584718	-0.295407	-0.302779	-0.699869	0.247402	0.519612	-0.0584112						0.0185148	0.318631	0.0919807
53.8853	0.375717	0.0534155	0.10224	0.137758	0.211881	-0.0560815	-0.30757	-0.295376	-0.707537	0.229403	0.516856	-0.0687061						0.0160001	0.319551	0.0922465
53.9836	0.372388	0.0515569	0.110074	0.140855	0.209686	-0.0539494	-0.318399	-0.287268	-0.712374	0.208352	0.517387	-0.0761352						0.0135144	0.319668	0.0922801
54.0819	0.368316	0.0506613	0.118826	0.145505	0.2072	-0.0527111	-0.329646	-0.27777	-0.711751	0.184423	0.519185	-0.0812715						0.0117473	0.318872	0.0920503
54.1802	0.362447	0.0457379	0.125604	0.154512	0.205917	-0.0513544	-0.338586	-0.270941	-0.709723	0.16153	0.520789	-0.0847081						0.0101021	0.317958	0.0917867
54.2786	0.355209	0.0425105	0.131493	0.165592	0.205652	-0.0498819	-0.344398	-0.261153	-0.707002	0.137022	0.523781	-0.0865698						0.00935467	0.316715	0.0914278
54.3769	0.348613	0.0377574	0.136369	0.177162	0.207671	-0.0488682	-0.346498	-0.254131	-0.704037	0.114073	0.528183	-0.0880877						0.00901707	0.315903	0.0911935
54.4752	0.337895	0.0301946	0.142041	0.185164	0.21221	-0.0465807	-0.347982	-0.248542	-0.707573	0.0877451	0.532595	-0.0842926						0.00773956	0.315966	0.0912116
54.5735	0.32543	0.0243763	0.147395	0.193752	0.217249	-0.0448696	-0.346714	-0.245461	-0.712336	0.0616281	0.5411	-0.0851817						0.00636408	0.317046	0.0915232
54.6718	0.317582	0.0223555	0.150356	0.204776	0.218977	-0.0434164	-0.345293	-0.245704	-0.715037	0.0317642	0.552938	-0.0897522						0.00496215	0.318998	0.0920869
54.7701	0.309697	0.0243719	0.150342	0.217922	0.222104	-0.0426833	-0.343341	-0.240318	-0.715348	0.00489455	0.566542	-0.090867						0.00527634	0.32068	0.0925723
54.8684	0.298597	0.0267056	0.146295	0.22923	0.228496	-0.0472127	-0.337549	-0.230105	-0.718197	-0.0241358	0.581636	-0.0882943						0.00545547	0.322397	0.093068
54.9667	0.284052	0.0322678	0.136725	0.241022	0.231085	-0.0492548	-0.329913	-0.217363	-0.720951	-0.055979	0.598367	-0.0843923						0.00547215	0.323798	0.0934723
55.065	0.267365	0.0382914	0.129636	0.253084	0.227715	-0.0505886	-0.323336	-0.204853	-0.721743	-0.0816341	0.617801	-0.0792566						0.00604016	0.325299	0.0939056
55.1633	0.253083	0.0459769	0.124021	0.260308	0.223953	-0.0494831	-0.31383	-0.194401	-0.717182	-0.107522	0.634776	-0.0703089						0.00744917	0.325489	0.0939607
55.2616	0.240862	0.054911	0.120282	0.267242	0.219168	-0.0521938	-0.302657	-0.186604	-0.711183	-0.131261	0.647032	-0.0615868						0.00866759	0.325147	0.0938619
55.3599	0.227393	0.0635177	0.120296	0.276968	0.21498	-0.0608856	-0.291742	-0.173801	-0.697773	-0.152699	0.657492	-0.0576404						0.0105088	0.323608	0.0934176
55.4582	0.217331	0.0725748	0.119054	0.28283	0.210162	-0.0661063	-0.278284	-0.167433	-0.684554	-0.17455	0.666155	-0.057058						0.0116767	0.322121	0.0929884
55.5565	0.20569	0.0844514	0.120234	0.287093	0.203887	-0.0727064	-0.266401	-0.166044	-0.66327	-0.196347	0.67593	-0.0522508						0.0133555	0.319852	0.0923334
55.6548	0.193944	0.0978049	0.123131	0.294379	0.198842	-0.0774536	-0.253834	-0.166673	-0.633455	-0.21797	0.684241	-0.0468546						0.0163418	0.316584	0.0913898
55.7531	0.180767	0.111908	0.12453	0.304777	0.192075	-0.0821177	-0.236497	-0.169064	-0.61018	-0.232303	0.686925	-0.0447668						0.0188377	0.313268	0.0904327
55.8514	0.169518	0.127883	0.125227	0.314201	0.183948	-0.0871422	-0.220493	-0.175856	-0.586866	-0.245006	0.690793	-0.0415196						0.0212239	0.310701	0.0896916
55.9497	0.160442	0.14589	0.127483	0.321796	0.174033	-0.0914105	-0.20689	-0.185854	-0.563745	-0.259381	0.688153	-0.0362893						0.0228523	0.307749	0.0888394
56.048	0.1577	0.161661	0.131947	0.33039	0.165879	-0.0932188	-0.197627	-0.196388	-0.54457	-0.271993	0.682348	-0.0312266						0.0245752	0.305678	0.0882415
56.1463	0.155089	0.174232	0.13676	0.335694	0.158398	-0.0993333	-0.189313	-0.207695	-0.534599	-0.277581	0.678306	-0.027398						0.0252133	0.304932	0.0880264
56.2446	0.153757	0.18917	0.141469	0.337173	0.149764	-0.108377	-0.181375	-0.216211	-0.52454	-0.278832	0.674516	-0.0216264						0.0262406	0.303728	0.0876789
56.3429	0.153848	0.20161	0.147372	0.337519	0.14018	-0.116811	-0.177983	-0.22495	-0.509148	-0.279497	0.668214	-0.014159						0.027183	0.301485	0.0870314
56.4412	0.149841	0.216616	0.152509	0.335149	0.126966	-0.124209	-0.177174	-0.231364	-0.494705	-0.286142	0.659749	-0.00621053						0.0267523	0.299271	0.086392
56.5395	0.149741	0.233547	0.153195	0.334857	0.111803	-0.134971	-0.175346	-0.239534	-0.474464	-0.293036	0.652936	0.000675946						0.026617	0.297239	0.0858056
56.6378	0.149632	0.250636	0.153855	0.334489	0.0996809	-0.15066	-0.176509	-0.246278	-0.450438	-0.293841	0.644272	0.00992687						0.027064	0.294511	0.0850179
56.7362	0.145812	0.262743	0.15677	0.331202	0.0893693	-0.169044	-0.17711	-0.250557	-0.431599	-0.289349	0.635798	0.019575						0.0269676	0.291715	0.0842109
56.8345	0.141271	0.272251	0.157703	0.326576	0.0780431	-0.185416	-0.180931	-0.257078	-0.411345	-0.286482	0.625793	0.0261247						0.0255425	0.288768	0.0833601
56.9328	0.137758	0.280303	0.161716	0.322395	0.0643333	-0.196666	-0.187252	-0.266359	-0.390143	-0.279197	0.613626	0.0297073						0.0241849	0.28534	0.0823705
57.0311	0.14033	0.285949	0.170907	0.317917	0.05417	-0.206996	-0.193057	-0.275961	-0.368636	-0.26711	0.602774	0.0340913						0.0245315	0.282174	0.0814566
57.1294	0.145468	0.29087	0.177076	0.315106	0.04884	-0.220015	-0.198044	-0.285312	-0.349719	-0.257076	0.58927	0.0383524						0.024568	0.279537	0.0806953
57.2277	0.151081	0.293979	0.184813	0.317816	0.0431423	-0.237862	-0.206131	-0.29372	-0.334698	-0.250187	0.574209	0.041351						0.0236495	0.278529	0.0804045
57.326	0.156332	0.299115	0.193242	0.319077	0.0388351	-0.251285	-0.214218	-0.301632	-0.318203	-0.246275	0.563339	0.0424499						0.0233981	0.278249	0.0803237
57.4243	0.162419	0.301267	0.199636	0.315141	0.0343421	-0.2592	-0.221639	-0.314226	-0.307077	-0.246605	0.550508	0.0460977						0.021722	0.277964	0.0802413
57.5226	0.166339	0.304415	0.208735	0.311314	0.0312337	-0.267053	-0.232509	-0.323596	-0.297744	-0.24314	0.538613	0.0513926						0.0206667	0.277981	0.0802461
57.6209	0.172986	0.309285	0.21639	0.307291	0.0256514	-0.272468	-0.2413	-0.328221	-0.296085	-0.229751	0.52433	0.0535821						0.0201409	0.277047	0.0799767
57.7192	0.181866	0.312093	0.220937	0.299936	0.0189229	-0.278206	-0.249855	-0.332214	-0.298806	-0.216233	0.509279	0.0587843						0.0188754	0.276042	0.0796864
57.8175	0.191393	0.312919	0.225559	0.290162	0.0166518	-0.282569	-0.26346	-0.333299	-0.296044	-0.207367	0.497321	0.0680032						0.0182725	0.275201	0.0794438
57.9158	0.20047	0.313	0.231068	0.278579	0.0161784	-0.28614	-0.27763	-0.330453	-0.299328	-0.197149	0.485409	0.0814133						0.0179516	0.274533	0.0792508
58.0141	0.207556	0.313453	0.233784	0.267842	0.0161382	-0.288271	-0.287648	-0.325865	-0.304638	-0.187196	0.478142	0.0932972						0.0180494	0.274056	0.0791131
58.1124	0.207927	0.316676	0.233761	0.256991	0.0148938	-0.291502	-0.293065	-0.321434	-0.308909	-0.175609	0.476088	0.099091						0.017909	0.273481	0.0789471
58.2107	0.206038	0.322435	0.233491	0.247124	0.0133934	-0.289633	-0.295039	-0.318825	-0.305719	-0.17029	0.468813	0.102656						0.0178705	0.271373	0.0783388
58.309	0.203842	0.326653	0.234762	0.238104	0.0155454	-0.283722	-0.295337	-0.316406	-0.305423	-0.167139	0.462992	0.102762						0.0180528	0.269315	0.0777446
58.4073	0.198205	0.332611	0.232795	0.228552	0.0207778	-0.278622	-0.29231	-0.317734	-0.314171	-0.158414	0.455615	0.0984816						0.017149	0.267451	0.0772065
58.5056	0.195764	0.336759	0.232518	0.221055	0.029514	-0.272574	-0.28955	-0.321486	-0.323444	-0.143412	0.445784	0.0950468						0.0171644	0.265585	0.0766678
58.6039	0.192011	0.337644	0.235865	0.213852	0.0385784	-0.266367	-0.288608	-0.323415	-0.335015	-0.125059	0.438039	0.0873095						0.0170696	0.264015	0.0762146
58.7022	0.18965	0.336696	0.23943	0.204288	0.0432088	-0.255182	-0.284379	-0.328501	-0.345468	-0.110873	0.428732	0.0790032						0.0163839	0.261826	0.0755826
58.8005	0.190863	0.338392	0.241832	0.193587	0.0488828	-0.241887	-0.27934	-0.335818	-0.357612	-0.101812	0.416549	0.0719967						0.0154693	0.260237	0.0751238
58.8988	0.194994	0.338161	0.247577	0.180391	0.0537529	-0.230908	-0.272529	-0.345461	-0.370361	-0.0936153	0.407671	0.0651778						0.014571	0.259785	0.0749936
58.9971	0.201015	0.338007	0.250688	0.167048	0.0576468	-0.220588	-0.265582	-0.356023	-0.386094	-0.0901519	0.397972	0.0598354						0.0128144	0.260106	0.0750861
59.0954	0.203678	0.338157	0.254366	0.152376	0.0592859	-0.21222	-0.259334	-0.366546	-0.407806	-0.0900325	0.387064	0.052939						0.00932737	0.261392	0.0754572
59.1938	0.205775	0.335527	0.257911	0.134213	0.0588405	-0.201678	-0.252865	-0.378303	-0.424752	-0.0892229	0.379841	0.0472129						0.00604168	0.262216	0.0756953
59.2921	0.208573	0.330288	0.258704	0.109741	0.0572783	-0.188259	-0.245072	-0.388824	-0.441893	-0.0805744	0.37572	0.0410562						0.00306142	0.262366	0.0757385
59.3904	0.213064	0.320242	0.256759	0.0853041	0.054458	-0.176566	-0.23944	-0.398323	-0.464126	-0.067131	0.3738	0.0389783						-0.000248368	0.263384	0.0760323
59.4887	0.219133	0.314265	0.254149	0.0618101	0.0507049	-0.167759	-0.232489	-0.405595	-0.487004	-0.0489231	0.376931	0.0359891						-0.00239894	0.265728	0.076709
59.587	0.226336	0.305435	0.249459	0.0390677	0.0471641	-0.160716	-0.224348	-0.413057	-0.509396	-0.0328155	0.381226	0.0328462						-0.00489984	0.268322	0.077458
59.6853	0.229224	0.292599	0.246459	0.0169084	0.0450247	-0.155437	-0.21587	-0.426138	-0.534459	-0.0275207	0.385232	0.0313818						-0.00938301	0.272076	0.0785415
59.7836	0.230757	0.279385	0.246848	-0.00352068	0.0428778	-0.151033	-0.207005	-0.438858	-0.557329	-0.0211995	0.392653	0.0249295						-0.013458	0.27629	0.0797582
59.8819	0.231761	0.270376	0.247728	-0.0218601	0.0382029	-0.149389	-0.19897	-0.453873	-0.586554	-0.00913789	0.404273	0.0154351						-0.0176673	0.28315	0.0817384
59.9802	0.234027	0.260866	0.246242	-0.03555	0.0334845	-0.148797	-0.190741	-0.468843	-0.617408	-0.000945891	0.416668	-0.000103825						-0.0225918	0.290525	0.0838673
60.0785	0.235832	0.246739	0.247126	-0.0482915	0.0290461	-0.151669	-0.187292	-0.484135	-0.648585	0.00959659	0.426957	-0.017473						-0.0285125	0.298162	0.086072
Analysis of -10-0s vs. 25-35s
10--0	0.0306616	0.0870207	0.0532415	0.136337	0.0263001	-0.0699573	0.0773138	-0.0880405	0.0985649	-0.0181157	-0.0261971	-0.134703
25-35	0.104585	-0.00440251	-0.0307759	0.102886	-0.0102813	-0.130577	-0.0357007	-0.304462	0.141969	0.206174	0.652711	-0.0680141
