# Supplementary material for: Cholecystokinin modulates age-dependent thalamocortical neuroplasticity
Source: eLife journal article supplement (doi:10.7554/elife.101513), 2024-10-14
Supplement: data1 [file Figure 4C.xlsx]

## Sheet: ACSF
	211011-1	211011-2	211011-3	211011-4	211018-4	211027-3	220117-2	220117-4	220118-3	220118-4	220126	220127			N=7
	1.04427	1.03087	1.04305	1.03747	0.972897	0.906464	0.958477	1.15409	0.929228	0.913266	1.0434	1.0094			n=12												1.00357	0.0204996	0.0710126
	0.989782	0.996072	1.09785	1.04545	1.02194	1.02603	0.9909	1.11702	1.09308	1.06975	1.06053	1.02956															1.04483	0.0125061	0.0433223
	0.968259	0.998207	0.942681	1.03146	0.986007	0.916537	1.00469	1.13566	0.983199	1.09191	1.05544	1.00697															1.01008	0.0177321	0.0614259
	1.04637	1.02912	0.921407	1.01276	1.03106	1.00956	0.994094	1.04884	1.0386	0.905767	0.953708	0.964178															0.99629	0.0141543	0.0490318
	0.892737	0.955711	0.925461	0.945738	1.06701	1.06565	1.00869	0.971163	1.08034	1.03896	1.05828	0.976489															0.998852	0.0181699	0.0629425
	1.01903	0.977135	1.09306	0.933318	1.00958	0.918683	1.0343	0.873407	0.985824	1.07955	0.902127	0.988436															0.984536	0.019708	0.0682705
	1.06548	1.00918	1.02761	0.965614	0.955058	1.08534	0.997763	0.831386	0.926385	0.984095	0.958147	1.03032															0.986365	0.0194951	0.067533
	0.974071	1.0037	0.948889	1.02818	0.956449	1.07174	1.01109	0.86844	0.963345	0.916695	0.968371	0.99466															0.975469	0.01524	0.0527928
																											#DIV/0!	#DIV/0!	#DIV/0!
																											#DIV/0!	#DIV/0!	#DIV/0!
	1.04654	1.23778	0.949067	1.04565			0.843364	1.08692	1.11444	1.46137	0.910062																1.07725	0.0536021	0.185683
	1.16342	1.24628	1.06719	1.00774			0.900649	1.12276	1.10966	1.1372	0.922644																1.07528	0.0327077	0.113303
	1.20509	1.25988	1.01788	0.983842			0.922159	1.09908	1.14302	1.35197	0.976021																1.10655	0.0419316	0.145255
	1.15415	1.23689	1.03577	1.08935			0.959548	1.02564	1.23438	1.17243	0.92296																1.09235	0.0331172	0.114721
	1.09592	1.20732	1.04414	0.997953			0.944516	1.02017	1.22651	1.20643	0.873121																1.06845	0.0361513	0.125232
	1.03495	1.21103	0.991141	1.05857			1.09593	1.25853	0.949175	1.25059	0.84111																1.07678	0.0411894	0.142684
	1.02881	1.1654	1.02502	1.08538			1.09003	1.26247	1.04275	1.26741	1.01261																1.10888	0.0288515	0.0999444
	1.07754	1.07262	1.05008	0.893775			1.15031	1.30365	1.19858	0.941195	0.948918																1.07074	0.038234	0.132446
	1.06693	1.14899	0.9577	1.12955			0.940703	1.30512	0.965146	1.3679	0.97106																1.09479	0.0454609	0.157481
	1.19911	1.18229	0.983933	1.10417			0.921589	1.35134	1.09265	1.03938	0.955678																1.09224	0.0394099	0.13652
	1.17098	1.16467	1.08728	0.966913			0.995738	1.1515	1.08383	1.14961	0.912618																1.0759	0.0276185	0.0956732
	1.15519	1.0892	1.09532	1.07674			1.04663	1.06243	1.07585	1.34959	1.05513																1.11179	0.0273154	0.0946233
	1.02214	1.12534	1.0586	1.08326			0.976075	1.24025	0.93525	0.946836	0.931819	0.901092															1.02207	0.0306472	0.106165
	1.07852	1.20241	1.05816	0.948722			0.969254	1.26257	1.06536	1.03417	0.998494	0.96111															1.05788	0.0298907	0.103544
	1.17882	1.15757	1.05867	1.0084			1.03489	1.23288	1.03213	1.05604	0.971591	0.939209															1.06702	0.0271358	0.094001
	1.03825	1.09219	1.10854	1.00815	1.13013		1.07131	1.18106	1.03298	1.0467	1.0179	0.922759															1.05909	0.01995	0.0691088
	1.11411	1.07728	1.06186	1.07436	1.17679	1.00808	0.990263	1.32498	1.06247	1.08672	1.03889	1.07208															1.09066	0.0253581	0.0878432
	1.08077	1.08074	1.04892	0.957857	1.19302	1.1941	0.985106	1.26217	1.08608	1.09881	0.921657	0.991409															1.07505	0.0297571	0.103082
	1.01673	1.03297	1.03926	1.01567	1.17941	1.2159	0.917564	1.20122	0.997903	0.966794	0.938079	1.03084															1.04603	0.0288292	0.0998673
	1.06625	1.09328	1.0207	1.06843	1.2371	1.13838	0.999273	1.14289	1.12007	1.0651	0.984891	1.00529															1.07847	0.0211425	0.0732398
	1.04291	1.06222	1.09717	0.980177	1.22602	1.13171	0.991959	1.08258	1.02668	1.11378	1.05439	0.903995															1.05946	0.0237188	0.0821642
	1.0891	1.0408	1.09419	0.951669	1.12641	1.10207	0.951609	1.16118	1.08375	1.29044	0.930822	0.962339															1.06536	0.0303802	0.10524
	1.08485	1.08869	1.08818	1.02233	1.15846	1.06483	1.0245	1.09429	0.935719	1.02763	0.92186	1.03437															1.04548	0.019367	0.0670893
	1.15462	1.06375	1.05421	1.03373	1.13828	1.02953	1.04075	1.1811	1.1112	1.03603	0.926132	0.985745															1.06292	0.0210177	0.0728074
	1.09637	1.05966	0.963071	1.01817	1.02235	0.954825	0.956506	1.17094	0.959708	0.99856	0.921206	0.915154															1.00304	0.0218663	0.0757472
	1.04174	1.0532	1.02875	0.920559	1.1711	1.01538	1.01808	1.163	1.0665	1.14587	0.920168	0.988577															1.04441	0.0240983	0.0834788
	1.04512	1.08145	1.00465	0.91459	1.1038	0.912177	1.05124	1.10349	1.02006	1.15845	0.975003	0.963281															1.02777	0.0223661	0.0774785
	1.143	1.16095	1.03157	1.07124	1.09374	0.85708	0.950079	1.10606	1.09021	1.12029	0.784436	0.968889															1.03146	0.034106	0.118147
	1.13522	1.11369	1.01328	1.09941	1.15892	0.963304	0.947028	1.14609	1.07187	1.02528	0.931791	0.93807															1.04533	0.0248716	0.0861579
	1.09306	1.12951	1.07344	0.966587	1.00314	0.847787	0.875338	1.13322	1.04296	1.07617	0.974227	0.991986															1.01729	0.0265717	0.092047

## Sheet: CCK
	211011-1	211011-2	211011-4	211021-1	211021-2	211026-1	211026-2	220118	220126-1-3	220127-1-1	220127-1-3	220127-2-1	220127-2-4
	0.986901	1.00785	1.01803	0.873727	0.932357	1.00546	1.69929	1.20509	0.97097	1.0175	1.0375	0.992067	1.04342		n=13 N=6											1.06078	0.0550243	0.205882
	1.05037	0.987528	1.00784	0.965592	1.01661	0.915856	0.997694	0.901422	0.999681	0.951685	0.983039	1.03681	0.932386													0.980501	0.0121065	0.0452984
	0.997387	1.03297	1.00958	0.966362	0.939886	0.935804	0.924672	1.06349	1.0037	1.04182	1.06934	1.01009	1.03382													1.00222	0.0127963	0.0478794
	0.947684	0.931531	0.99303	1.03458	0.973201	0.873882	1.04855	1.07984	1.0157	0.898165	0.932186	0.967294	1.01292													0.977583	0.0161734	0.0605152
	0.950758	1.00931	0.999963	1.03182	1.09051	0.954465	0.954696	1.04074	0.998465	1.01161	0.990129	1.00516	1.04893													1.00666	0.0107956	0.0403934
	1.0398	1.00542	0.953692	1.0244	1.0282	1.09499	0.97996	0.85724	0.990828	0.977051	0.927533	1.06851	0.920159													0.989829	0.0173444	0.0648967
	1.03273	0.999297	1.04455	1.07995	1.00652	1.10123	1.02531	1.04705	1.00993	1.0888	1.00246	0.890019	1.03999													1.0283	0.0141988	0.053127
	0.99437	1.02609	0.973325	1.02357	1.01272	1.11832	0.913428	1.06169	1.01073	1.01336	1.05781	1.03005	0.968384													1.01568	0.0133146	0.0498186
	1.28818	1.85043	1.69482	1.348		2.78091	1.1866	1.27544	1.22103	1.47389	1.32055	1.22291	1.28223													1.49542	0.120947	0.452543
	1.21734	1.74865	1.84096	1.21555		2.26018		1.28401	1.15998	1.49608	1.37515	1.10358	1.14314													1.44042	0.0978363	0.36607
	1.18987	1.70724	1.76968	1.16586		2.68828	1.185	1.31763	1.11328	1.53066	1.1556	1.23921	1.17112													1.43612	0.121257	0.453704
	1.14522	1.70934	1.79177	1.19435		2.71008	1.42693	1.24231	1.1265	1.45825	1.22449	1.11127	1.30681													1.45394	0.12126	0.453712
	1.1611	1.63023	1.56305	1.10889		2.80206	1.50877	1.27665	1.13496	1.52454	1.30671	1.15595	1.17703													1.44583	0.124649	0.466394
	1.00823	1.62489	1.44256	1.22673		2.92491	1.48895	1.17663	1.20098	1.34269	1.29221	1.19141	1.21183													1.42767	0.133468	0.499391
	1.00359	1.5605	1.60675	1.17561		2.86099	1.2828	1.19474	1.12989	1.56494	1.47034	1.23465	1.27029													1.44626	0.129684	0.485232
	1.03911	1.51371	1.54728	1.18423		2.95225	1.46716	1.1778	1.08607	1.37717	1.54318	1.30453	1.26433													1.45473	0.134501	0.503255
	1.14187	1.47449	1.72916	1.15415		3.06231	1.63252	1.05485	1.09667	1.37197	1.41285	1.35922	1.31414													1.48368	0.144046	0.538971
	1.05901	1.61459	1.61363	1.10544	1.31609	3.08254	1.48649	1.24356	1.06779	1.64438	1.53342	1.37231	1.37515													1.50111	0.138466	0.518093
	1.06853	1.49021	1.48236	1.14384	1.28122	3.10844	1.51633	1.11997	1.11953	1.68091	1.46466	1.40175	1.4631													1.48776	0.139746	0.52288
	1.1851	1.45403	1.5501	1.18147	1.32819	2.9612	1.37116	1.11818	1.15732	1.37926	1.36997	1.221	1.4075													1.43727	0.127158	0.47578
	1.05655	1.48348	1.51753	1.14782	1.2914	3.10023	1.61856	1.01303	1.16428	1.6606	1.672	1.36415	1.3712													1.49699	0.141835	0.5307
	1.09172	1.51119	1.49127	1.15493	1.48982	3.24173	1.6298	1.11949	1.08337	1.54623	1.69189	1.30368	1.48345													1.52604	0.148882	0.557066
	1.13671	1.44182	1.56145	1.14086	1.41727	3.32487	1.60057	1.08204	1.08632	1.44608	1.42008	1.49753	1.34798													1.50027	0.154177	0.576878
	1.19072	1.38567	1.42293	1.09415	1.26394	3.07537	1.62828	1.12899	1.12321	1.87621	1.77144	1.35192	1.50877													1.52474	0.141047	0.527748
	1.06218	1.4341	1.56552	1.14563	1.26197	3.13091	1.5905	1.11343	1.09468	1.73327	1.59556	1.31407	1.42861													1.49772	0.143666	0.537549
	1.16079	1.4146	1.39701	1.16663	1.44245	3.3486	1.55924	1.08126	1.11203	1.48502	1.51454	1.48053	1.45714													1.50922	0.154219	0.577036
	1.08291	1.49377	1.40874	1.13982	1.51275	3.11237	1.5222	1.05057	1.12758	1.82247	1.75425	1.39718	1.51842													1.53408	0.142628	0.533666
	1.1073	1.44662	1.39956	1.08363	1.40322	3.14014	1.69146	1.10168	1.13056	1.92286	1.48452	1.45767	1.42517													1.52264	0.145396	0.544023
	1.10394	1.41189	1.31744	1.10461	1.47111	3.00165	1.63795	1.09754	1.12574	1.76725	1.68467	1.42544	1.61637													1.52043	0.134747	0.504176
	1.11923	1.32903	1.43465	1.12105	1.45945	3.17572	1.47919	1.07326	1.09832	1.47185	1.58387	1.52822	1.5427													1.49358	0.14404	0.538947
	1.05614	1.29585	1.44684	1.11805	1.47375	2.75953	1.71896	1.09658	1.06122	1.71979	1.68319	1.28085	1.36461													1.46733	0.122282	0.457537
	1.12187	1.31585	1.43184	1.1326	1.34191	3.19713	1.49689	1.1425	1.11733	1.79735	1.82121	1.29812	1.38203													1.50743	0.149235	0.558386
	1.14669	1.26432	1.30039	1.12697	1.23785	3.09601	1.6353	1.05338	1.10342	1.75103	1.83474	1.39713	1.39894													1.48817	0.145251	0.543479
	1.14375	1.35114	1.28079	1.14602	1.34849	3.25759	1.5165	1.22108	1.1233	1.67684	1.60024	1.52123	1.52929													1.51664	0.148274	0.554791
	1.05487	1.27272	1.23753	1.16179	1.30163	3.19828	1.59993	1.06576	1.05858	1.74248	1.74088	1.37718	1.49218													1.48491	0.151952	0.568551
	1.0822	1.30991	1.24044	1.10419	1.24186	3.0978	1.48451	1.09016	1.0726	1.85231	1.84095	1.34926	1.45822													1.4788	0.147684	0.552584
	1.08492	1.30227	1.30517	1.19528	1.27644	3.00422	1.60926	1.33847	1.07755	1.54288	1.76898	1.49274	1.48609													1.49879	0.132417	0.49546
	1.1836	1.32525	1.25745	1.10719	1.27336	2.66674	1.47163	1.18412	1.06522	1.78563	1.7815	1.38095	1.40775													1.45311	0.114459	0.428268
