# Supplementary material for: Cholecystokinin modulates age-dependent thalamocortical neuroplasticity
Source: eLife journal article supplement (doi:10.7554/elife.101513), 2024-10-14
Supplement: data1 [file Figure 4F.xlsx]

## Sheet: CCK
	201208-1-3	201209-1-4	201210-1-4	201217-1-1	210104-1-1	210111-1-3	210114-1-4	210118-2-3	210106-1	210107-1																AV	SD	SE
	1.31253	1.08455	1.10792	1.13314	0.894383	0.763585	1.09864	0.840401	1.11881	0.588415		n=10, N=10														0.994238	0.21593	0.068283
	0.846221	1.01943	1.10675	0.893161	1.12776	1.01201	0.923512	1.02344	0.939107	1.38114																1.02725	0.153207	0.0484484
	0.831776	1.01963	0.981245	1.16347	1.0038	1.16824	0.860067	1.06083	0.979132	0.774305																0.984249	0.131762	0.0416669
	1.28023	0.777873	0.8642	1.15371	0.937799	1.15704	0.88937	1.01116	0.883883	1.00263																0.99579	0.157814	0.0499053
	1.03298	0.984644	0.808033	0.868357	1.02627	0.835262	0.952887	1.05025	1.03143	1.55346																1.01436	0.209051	0.0661078
	0.864259	1.07742	1.05502	0.80239	1.06335	1.1913	1.12937	0.828755	0.970257	0.851971																0.983409	0.138729	0.0438699
	0.873154	1.02409	1.13742	1.16587	1.04377	1.13172	1.07293	0.96315	1.05183	0.774737																1.02387	0.123263	0.0389791
	0.958855	1.01237	0.939414	0.819899	0.902877	0.740847	1.07322	1.22202	1.02555	1.07334																0.976839	0.137383	0.0434443
	2.06334	1.22917	1.16668	1.22127	1.81438	0.803891	1.36486	1.53057	1.30828	1.55153																1.4054	0.354654	0.112151
	1.93566	1.19626	1.17077	1.1677	1.70978	1.2316	0.954836	1.4887	1.20966	1.59999																1.3665	0.303739	0.0960506
	1.75684	1.55576	1.36434	0.949114	1.59411	0.9119	0.916202	1.58812	1.05978	1.33161																1.30278	0.321012	0.101513
	1.76114	1.20333	1.15888	1.37389	1.88623	1.13065	0.910065	1.36465	1.15696	1.31805																1.32638	0.296228	0.0936756
	1.93594	1.03199	1.51599	0.918697	1.73829	0.777734	0.977214	1.41712	1.10459	1.33417																1.27517	0.377751	0.119455
	1.36602	1.22939	1.26013	1.22136	1.5139	1.15769	1.07793	1.37685	1.05273	1.95386																1.32098	0.26302	0.0831744
	1.48491	1.06686	1.06254	1.2527	1.58695	1.53669	0.910048	1.733	1.04835	1.55691																1.3239	0.288425	0.0912081
	1.30312	1.24415	1.10434	1.22372	1.69901	0.921874	1.27094	1.52599	1.1144	2.0861																1.34936	0.338194	0.106946
	1.61257	1.0646	1.14567	0.972453	1.72857	1.90751	1.2547	1.3588	0.976738	1.26884																1.32904	0.323093	0.102171
	1.07203	1.33017	1.41839	0.928446	2.04113	1.37499	1.25115	1.63524	0.981151	1.44013																1.34728	0.328898	0.104007
	2.01837	1.27165	1.59222	1.24529	1.85259	0.850171	1.17171	1.2068	1.03019	1.21811																1.34571	0.364646	0.115311
	1.6949	1.43242	1.38111	0.846681	1.75265	1.81517	1.22141	1.45128	1.05832	0.842231																1.34962	0.354066	0.111965
	1.75561	1.33502	1.06734	1.13737	2.1042	0.889807	1.09695	1.3854	1.08639	1.61993																1.3478	0.376835	0.119166
	2.06548	1.2628	1.22511	1.10354	1.53229	0.870717	0.981569	1.35967	1.00221	2.44415																1.38475	0.505599	0.159884
	2.44893	1.01511	1.29371	1.40193	1.83656	0.939473	1.00902	1.32152	1.03921	1.36511																1.36706	0.46451	0.146891
	1.07583	1.04451	1.35402	1.65268	1.75902	1.20527	1.13172	1.50193	1.00347	1.74297																1.34714	0.296933	0.0938985
	2.24042	1.24141	1.05138	1.25775	1.62454	1.35841	1.10569	1.28531	1.15413	1.75158																1.40706	0.366471	0.115888
	2.42585	1.40477	1.33165	0.925593	1.57914	0.787803	1.35223	1.69624	1.05433	1.03025																1.35879	0.473551	0.14975
	1.66497	1.06905	1.21884	1.27704	1.8105	1.06645	0.941533	1.24915	1.00779	2.18279																1.34881	0.405624	0.12827
	1.9951	1.20763	1.3981	1.10181	1.77681	1.31835	1.50815	1.49471	1.06227	1.50894																1.43719	0.290876	0.0919832
	1.84587	1.23541	1.19482	1.18412	1.84706	1.68967	1.2452	1.44224	1.11005	1.70352																1.4498	0.293546	0.0928273
	1.67316	1.1109	1.41427	1.00914	1.92251	1.47301	1.34508	1.47014	1.00733	2.04417																1.44697	0.356609	0.11277
	1.5084	1.27845	1.42305	1.39916	2.03346	1.76776	1.45434	1.49858	1.10161	0.954883																1.44197	0.306558	0.0969422
	1.99038	1.08713	1.31272	1.48565	1.70376	1.48687	1.27339	1.27651	1.05671	1.86226																1.45354	0.315412	0.0997419
	1.93547	1.04838	1.54066	1.58342	1.6958	0.786428	1.37765	1.42832	1.02552	1.88579																1.43074	0.37945	0.119993
	1.67167	1.17675	1.15042	1.47957	1.83584	0.964662	1.66509	1.26624	1.06248	2.01879																1.42915	0.357186	0.112952
	2.4364	1.33511	1.42684	1.17172	1.8087	1.071	1.10703	1.24749	1.10589	2.05974																1.47699	0.468807	0.14825
	1.74378	1.24094	1.23606	1.24581	1.65442	1.84568	1.35107	1.24839	1.03784	1.76937																1.43734	0.28607	0.0904631
	1.49546	1.27996	1.39438	1.22248	2.05166	0.962572	1.33051	1.46411	1.04758	2.39289																1.46416	0.440817	0.139398
	1.55187	1.13628	1.41856	1.20636	2.02807	1.10505	1.27705	1.59383	1.01891	2.66044																1.49964	0.505444	0.159836

## Sheet: ACSF
	201208-1-3	201209-1-4	201210-1-4	201217-1-1	210106-1-3	210107-1-2	210111-1-3	210114-1-3	210118-1-4	201217-1-2	201217-1-3	210104-1-1	210106-1	210106-2	210111-1-3	210111-1-4	210111-1-3	210114-1-1	210114-1-4					AV	SD	SE
	0.752145	1.03692	1.15222	1.04428	1.05306	0.988321	0.96858	0.990802	0.976256	0.920455	1.04725	0.970259	1.05096	1.06968	1.0638	0.954983	1.00919	1.01941	0.844176		n=19 N=10			0.995407	0.088144	0.0202216
	0.867176	0.975532	0.955061	0.93044	0.894481	0.999987	0.99065	1.09646	1.01509	1.00517	0.979207	1.01007	1.00474	1.07248	0.97029	0.928002	1.03431	0.961729	1.17318					0.992845	0.0704806	0.0161694
	0.791545	0.98288	0.877299	1.00903	1.07712	1.04804	1.07775	0.825216	1.00953	0.859169	0.937857	0.955477	0.981491	0.978782	0.961575	1.15184	1.04348	1.01872	0.985828					0.977506	0.0905702	0.0207782
	1.19439	0.855857	1.15201	1.01856	0.866063	0.997289	0.951966	0.859534	0.941842	1.18347	1.01053	1.03702	1.00577	0.818372	0.983485	1.02861	0.982871	1.08165	1.04892					1.00096	0.106451	0.0244215
	1.14997	1.1058	1.08239	1.0645	0.871813	1.05272	0.951045	1.02503	1.00481	0.916569	1.00038	1.01178	0.910914	1.05459	1.06995	0.946456	1.03466	0.957191	0.902186					1.00593	0.0762301	0.0174884
	0.995289	1.10992	0.791268	1.15602	1.11962	1.05819	1.06939	1.18721	1.02483	1.17559	1.00399	0.923637	0.971373	0.856391	0.945081	0.92886	0.93089	1.02859	1.06401					1.0179	0.107494	0.0246608
	1.13538	0.917676	0.942628	0.956544	1.09329	0.943546	0.893686	0.923692	1.04045	0.960318	0.985031	1.08742	1.04185	1.03615	0.944167	0.997745	1.03479	0.971774	0.964706					0.993203	0.0662211	0.0151922
	1.11411	1.01541	1.04713	0.820622	1.02455	0.911913	1.09694	1.09205	0.987193	0.979266	1.03575	1.00433	1.0329	1.11355	1.06165	1.06351	0.929812	0.960939	1.017					1.01624	0.0742812	0.0170413
	1.12607	1.01074	1.27013	0.941863	1.07955	0.955138	0.985162	1.05533		1.06898	1.00903	0.919294	1.08027	1.07461	0.978037	1.1556	0.947014	1.0266	0.852972					1.0298	0.0973729	0.0223389
	0.771318	1.25918	1.05929	0.904546	1.02957	0.921891	1.34549	0.842247		0.995586	0.752775	1.04828	1.08714	1.01743	1.52483	1.21672	0.94859	1.10965	1.05762					1.04956	0.195669	0.0448896
	0.869424	0.969332	0.723703	0.776019	1.00191	1.00237	1.29799	1.13696		1.48659	0.889514	0.933034	1.01448	0.999166	1.33576	1.02485	0.951093	0.937434	1.08716					1.02427	0.19134	0.0438965
	1.05138	1.04846	1.02488	1.30398	0.955852	0.853838	0.753796	0.720931		0.883929	1.06707	1.01414	1.021	0.943443	1.2886	1.06104	0.96453	0.915871	1.14291					1.00087	0.152892	0.0350759
	0.650821	1.06461	1.05571	0.996041	1.06576	0.881537	0.781587	1.23371		1.27577	1.16801	1.09043	0.923797	0.815942	0.748344	0.93523	1.00177	0.920087	0.974433					0.976867	0.165739	0.0380231
	1.0776	0.995062	1.46566	1.00981	1.07422	0.955604	0.77182	1.02747		0.897546	1.36971	0.926673	0.970674	0.984437	0.775934	1.23206	0.986346	1.15475	0.973257					1.03604	0.178634	0.0409815
	0.85684	0.995127	1.48415	1.33635	1.0422	1.03107	1.01472	1.19276	1.05273	0.833174	0.969193	1.0322	0.981252	1.05393	0.766238	0.984651	0.882924	0.924915	0.977903					1.0217	0.168291	0.0386085
	0.792152	0.922991	1.04202	1.1612	0.811698	0.99647	0.967865	1.05799	0.861527	1.41921	1.24793	1.01711	0.976882	0.964442	1.00738	0.934281	0.908743	1.0096	0.973399					1.00384	0.146902	0.0337015
	0.930089	1.01349	1.0498	1.21096	0.926167	0.880227	1.00047	0.841021	1.04105	0.811173	1.35443	1.03109	0.907057	0.942508	0.960865	1.14822	0.962313	1.14678	0.872936					1.00161	0.136537	0.0313237
	0.893221	1.01446	1.03137	0.862178	0.88049	0.856058	0.771088	0.980305	1.0517	1.37361	0.802008	1.08311	0.888269	0.899272	0.993237	0.869163	0.882255	0.988251	1.24205					0.966425	0.14883	0.034144
	0.662548	0.984363	1.47098	0.835183	1.03497	0.824992	1.23293	1.19728	1.04796	0.883677	1.18453	1.03876	0.893575	0.728262	0.765511	1.10918	0.954344	0.956214	1.03778					0.99174	0.1966	0.0451032
	1.11913	0.843211	1.23035	0.740907	1.08027	0.823109	1.21565	1.09282	1.05175	1.10618	0.795698	0.979508	0.954128	0.842663	1.44946	0.968238	0.92833	0.960974	1.10601					1.01518	0.175014	0.0401509
	0.939893	1.09454	1.3773	0.916194	0.928661	0.987697	1.27509	1.02739	0.922434	0.782634	1.07361	1.10184	0.98491	0.980172	1.22401	1.08993	0.892966	1.04787	0.902402					1.02892	0.14509	0.033286
	0.801657	0.972064	1.70314	1.04921	0.911534	0.899902	0.907149	1.01746	0.99202	0.762213	1.0199	0.994044	0.956462	1.05773	1.20686	1.00024	0.956152	1.16017	0.969713					1.01777	0.195969	0.0449584
	0.71769	1.22844	0.998848	0.700362	0.814979	0.840735	1.19911	1.37318	0.89685	1.40875	0.640482	1.0045	0.917498	0.881361	1.26587	1.01923	0.952867	1.01209	1.1565					1.00154	0.22185	0.0508959
	0.890359	1.05543	1.19819	0.826009	0.932685	0.896342	1.07365	1.07449	1.06279	0.753402	1.39697	0.982831	0.885184	1.0077	0.900588	1.1988	1.00435	1.07292	0.990484					1.01069	0.148965	0.0341749
	0.556554	1.28542	1.17407	0.966371	1.04832	0.967572	0.678677	1.03701	0.99114	0.633292	1.06688	0.962046	0.9139	1.07026	1.19044	0.823959	1.03597	1.08887	1.06541					0.97664	0.188668	0.0432834
	0.801225	0.985561	1.82873	1.09215	1.08069	0.762941	0.620236	1.27841	1.00066	1.07546	1.02239	0.953506	0.950392	0.853031	1.06588	0.986232	0.891013	0.970788	1.06359					1.01489	0.243693	0.0559069
	0.597309	1.06151	1.64075	0.860846	1.00183	0.877316	0.870359	0.771629	0.959469	1.26353	1.25764	1.01257	0.966205	1.02494	0.673768	1.19481	0.942174	0.991398	1.15022					1.00622	0.23439	0.0537728
	1.08781	1.16924	1.23834	1.22923	0.840878	0.872163	1.24579	0.978484	1.02992	1.0342	0.784802	0.871654	0.924204	0.870884	0.61575	0.955742	0.936039	1.06492	0.914677					0.982354	0.165795	0.0380359
	0.701343	0.74587	1.50455	1.19244	1.03627	0.920704	0.881643	0.829437	1.06016	0.862967	1.30348	1.09949	0.891629	0.767036	0.864064	1.23002	0.895416	0.93507	0.962439					0.98337	0.20672	0.0474248
	0.689371	0.907664	1.33371	1.12137	0.869818	0.814175	0.911022	0.846517	0.966728	1.15401	1.11307	0.962199	0.955202	0.895864	1.23678	1.0913	0.918014	0.932915	1.00578					0.985554	0.155929	0.0357725
	0.573387	1.11763	2.05022	1.26491	0.90689	0.883013	0.844804	1.18349	1.02636	1.01141	1.19085	0.956642	0.87753	0.959107	0.875266	0.957409	0.914519	1.02282	0.92977					1.02874	0.290529	0.066652
	0.635841	1.05053	1.33229	1.11197	1.02767	0.89198	1.11965	0.896535	0.988435	1.32095	1.10196	0.995011	0.912723	0.901142	0.904433	0.873	0.954433	1.09265	0.972595					1.00441	0.160353	0.0367874
	1.06105	1.25741	0.725433	0.836939	0.994152	0.959469	1.2925	1.17934	0.946535	1.08025	1.01448	1.09803	0.989831	1.11475	0.838694	0.903196	0.962032	1.07674	0.895236					1.0119	0.144291	0.0331027
	0.856124	1.05073	1.18122	0.773359	1.02885	0.974204	1.28011	1.03972	1.01896	0.94421	1.23301	1.09757	0.90151	0.911151	1.11155	0.766393	0.969836	1.04118	1.12844					1.01622	0.14044	0.0322191
	0.716292	0.801604	1.04032	1.12369	0.955331	0.855441	0.924106	1.0386	1.03981	0.909834	1.33122	1.03962	0.908372	0.932886	1.28316	0.935361	0.919883	1.04993	0.915488					0.985312	0.148534	0.034076
	0.723664	1.01468	0.972704	1.14572	0.89867	0.835532	1.31801	1.03232	0.967715	0.864643	1.2545	0.922084	0.902401	0.866608	1.27086	0.876499	0.936883	1.02881	0.968887					0.989536	0.157742	0.0361886
	0.794693	1.04326	0.879917	0.790235	0.974223	0.836805	1.25209	1.03123	1.19169	1.12183	0.94451	0.984972	0.987028	0.934379	0.917422	1.17068	0.928174	1.16838	1.03542					0.999313	0.134235	0.0307955
