# Supplementary material for: Cholecystokinin modulates age-dependent thalamocortical neuroplasticity
Source: eLife journal article supplement (doi:10.7554/elife.101513), 2024-10-14
Supplement: data1 [file Figure 5F.xlsx]

## Sheet: Sheet1
Date	Block	Channel	9604	9408	9016	8232	6664							ctrl							CCK4
20220213ppi	1	1	0.171706	0.191956	0.344799	0.363107	0.337032	CCK4						-0.187819	0.182709	0.231474	0.371167	0.552172			0.0412541	0.467547	0.508801	0.485699	0.636414
20220213ppi	1	4	0.0555501	0.105693	0.210795	0.332219	0.468784	Ctrl						0.205792	0.371721	0.513118	0.499489	0.355026			0.35192	0.697898	0.619744	0.609232	0.66042
20220228ppi	1	2	0.284209	0.233824	0.322032	0.488045	0.497231	CCK4						0.0968523	0.407789	0.269572	0.461663	0.602906			0.214728	0.517696	0.670687	0.767497	0.74877
20220228ppi	1	3	0.186005	0.238129	0.277758	0.398429	0.200643	ctrl						0.265925	0.367723	0.47516	0.458244	0.632582			0.2902	0.450727	0.536632	0.697975	0.716732
20220228ppi	2	1	0.193197	0.119788	0.0441527	0.0803194	0.202027	ctrl						-0.0829728	0.0726205	-0.0645859	0.0360012	0.0834363			0.176471	0.216008	0.0646095	0.10704	0.0443587
20220228ppi	2	2	0.187738	0.356025	0.18351	0.239746	0.396195	CCK4						0.224219	0.132072	0.34702	0.516178	0.471334			0.323227	0.434079	0.507203	0.506242	0.623131
individual testing														-0.17876	-0.0048895	-0.0449834	0.079601	-0.0524154			0.40513	0.309155	0.406015	0.397833	0.670942
20220620ppi	1	1	-0.187819	0.182709	0.231474	0.371167	0.552172	ctrl						-0.0414721	-0.0740181	-0.0579511	-0.0887119	0.0181269			0.234865	0.14975	0.0888263	0.0875464	0.28299
20220620ppi	1	2	0.205792	0.371721	0.513118	0.499489	0.355026	ctrl						0.0230116	0.0660845	0.0426009	0.0721029	0.0351664			0.196891	0.347474	0.386334	0.550194	0.486075
20220620ppi	2	1	0.0412541	0.467547	0.508801	0.485699	0.636414	CCK4						0.204319	0.27058	0.326873	0.114803	0.573274			0.144608	0.27342	0.329248	0.316176	0.400054
20220620ppi	2	2	0.35192	0.697898	0.619744	0.609232	0.66042	CCK4						0.263592	0.176052	0.184466	0.239482	0.419903			0.0578811	0.147287	0.468734	0.28062	0.428941
20220620ppi	3	1	0.214728	0.517696	0.670687	0.767497	0.74877	CCK4						0.0742129	0.236582	0.172564	0.229235	0.271664			0.191617	0.270493	0.400578	0.506504	0.628123
20220620ppi	3	2	0.2902	0.450727	0.536632	0.697975	0.716732	CCK4						0.193197	0.119788	0.0441527	0.0803194	0.202027			0.187738	0.356025	0.18351	0.239746	0.396195
20220620ppi	4	1	0.0968523	0.407789	0.269572	0.461663	0.602906	ctrl						0.186005	0.238129	0.277758	0.398429	0.200643			0.284209	0.233824	0.322032	0.488045	0.497231
20220620ppi	4	2	0.265925	0.367723	0.47516	0.458244	0.632582	ctrl						0.0555501	0.105693	0.210795	0.332219	0.468784			0.171706	0.191956	0.344799	0.363107	0.337032
20220620ppi	5	1	0.176471	0.216008	0.0646095	0.10704	0.0443587	CCK4
20220620ppi	5	2	0.323227	0.434079	0.507203	0.506242	0.623131	CCK4
20220703ppi	1	2	-0.0829728	0.0726205	-0.0645859	0.0360012	0.0834363	ctrl
20220703ppi	2	1	0.40513	0.309155	0.406015	0.397833	0.670942	CCK4
20220703ppi	2	2	0.224219	0.132072	0.34702	0.516178	0.471334	CTRL
20220705ppi	1	1	-0.17876	-0.0048895	-0.0449834	0.079601	-0.0524154	CTRL
20220705ppi	1	2	-0.0414721	-0.0740181	-0.0579511	-0.0887119	0.0181269	CTRL						0.0867768	0.177909	0.195202	0.253348	0.322309			0.218163	0.337556	0.389183	0.426897	0.503827
20220705ppi	2	1	0.0230116	0.0660845	0.0426009	0.0721029	0.0351664	CTRL
20220705ppi	2	2	0.234865	0.14975	0.0888263	0.0875464	0.28299	CCK4
20220901ppi	1	1	0.196891	0.347474	0.386334	0.550194	0.486075	CCK4
20220901ppi	1	2	0.144608	0.27342	0.329248	0.316176	0.400054	CCK4
20220901ppi	2	1	0.204319	0.27058	0.326873	0.114803	0.573274	CTRL
20220901ppi	2	2	0.263592	0.176052	0.184466	0.239482	0.419903	CTRL
20220901ppi	3	1	0.0578811	0.147287	0.468734	0.28062	0.428941	CCK4
20220901ppi	3	2	0.191617	0.270493	0.400578	0.506504	0.628123	CCK4
20220901ppi	4	1	0.0742129	0.236582	0.172564	0.229235	0.271664	CTRL
