# Supplementary material for: Cholecystokinin modulates age-dependent thalamocortical neuroplasticity
Source: eLife journal article supplement (doi:10.7554/elife.101513), 2024-10-14
Supplement: data1 [file Figure S1C.xlsx]

## Sheet: Sheet1
CCK-Cre mice Young adult	20211103-1-2	20211103-2-1	20211103-2-2	20211103-2-3	20211103-2-4	20211103-3-1	20211103-3-2	20211103-3-3	20220923-1-3	20220923-2-1	20220923-2-2	20220923-2-4	20221011-1-2	20221011-1-4	20221011-2-1	20221011-2-3	20221013-1-3	20221014-1-4
AAV9-EFIa-DIO-ChETA-EYFP_MGB	0.732152	1.05857	1.2202	1.51409	1.01097	1.28415	0.950908	0.86274	0.83532	1.01206	0.942275	1.04025	0.970957	0.948959	0.925465	0.853576	1.12595	1.05687		N=6				1.01919	0.0429772	0.182337
laser in MGB	1.26744	1.08386	1.3214	1.16586	1.07777	0.794462	1.14374	0.771973	0.981869	1.03904	0.949679	0.83556	0.931011	1.02367	1.05589	1.0948	0.763338	0.875598		n=18				1.00983	0.0383022	0.162502
	0.728082	0.698695	0.713563	1.27045	1.20337	1.31821	0.891823	1.17331	1.12573	0.914659	1.00823	0.975586	1.08218	0.950552	0.974861	0.843592	1.04105	0.884435						0.988799	0.0433523	0.183928
	0.779817	1.21396	1.25105	0.329589	0.988359	0.933502	0.719211	1.14719	1.1769	1.00849	1.01999	1.00459	0.959277	1.00775	1.02799	1.08292	1.06571	1.02893						0.985846	0.049656	0.210673
	1.15249	1.16185	0.863956	0.856281	1.07589	0.830492	1.16667	1.16444	1.07378	1.00465	1.00027	0.949076	1.02772	1.01917	1.10515	1.1798	1.06239	0.965913						1.03667	0.0262814	0.111503
	0.958053	0.690723	0.698013	1.34689	0.792434	0.873785	0.891226	0.984615	0.929072	0.978532	1.01445	0.978767	0.901253	1.03861	0.956259	1.07747	0.887209	1.13353						0.951717	0.0358792	0.152223
	1.00895	1.23113	1.00801	0.766659	1.02663	0.826413	1.25845	0.953147	0.978017	1.01234	1.03413	1.12358	1.0944	1.07882	0.890064	0.77926	1.15558	1.02072						1.01368	0.0324449	0.137652
	1.37302	0.861213	0.923807	0.750175	0.824566	1.13899	0.977968	0.942576	0.899316	1.03023	1.03098	1.09259	1.0332	0.932456	1.06433	1.08857	0.898777	1.034						0.994264	0.0328166	0.139229
	2.09691	1.07728	1.28508	1.86259		1.20489	0.903381	1.25632	1.13025	1.33185	1.40701	1.26423	1.18281	1.06345	1.34786	1.12673	0.998687	0.84038						1.20518	0.0556887	0.236267
	1.39391	1.26356	0.872682	1.76491	0.997638	1.3498	1.00444	1.5798	1.04187	1.63093	1.53251	1.23443	1.07647	1.08074	1.07878	1.23194	0.948838	0.99426						1.21668	0.0630399	0.267456
	2.41519	1.08154	1.12596	1.80101	1.26884	1.12773	1.08159	1.47643	1.01259	1.1888	1.24578	1.35324	1.05663	1.08117	1.1201	0.913629	0.953453	0.848216						1.23066	0.0868723	0.368568
	2.2316	1.76149	1.17817	1.88629	1.33598	1.18548	0.989132	1.23822	1.06095	1.18865	1.25688	1.31977	1.24583	1.10045	0.843838	0.692691	0.950991	0.908921						1.24307	0.0897014	0.380571
	2.06572	1.2539	1.35588	1.60216	1.17765	1.48006	0.936194	1.04431	1.37923	1.47972	1.32115	1.32047	1.11199	0.951039	0.855845	0.819006	1.10689	0.847457						1.22826	0.0745934	0.316473
	1.89085	1.1289	0.861048	0.878312	1.63204	1.46696	1.2089	1.1637	1.14088	1.10409	1.15028	1.36587	1.02804	0.980421	1.32937	0.925048	0.839773	1.155						1.18053	0.0651237	0.276297
	2.18309	1.22572	1.00137	1.71737	1.32682	1.31464	0.893721	1.5393	1.06653	1.21128	1.15896	1.41459	1.1823	1.01678	0.906028	0.947536	0.898261	1.011						1.22307	0.0783679	0.332487
	1.2158	1.22129	0.928057	2.13681	1.60444	1.37498	0.834745	1.31092	1.40968	1.05679	1.03179	1.12858	1.15475	1.16587	1.19393	0.986453	0.868843	0.952778						1.1987	0.0725281	0.307711
	1.11416	0.936416	1.19773	0.977615	1.36359	1.31084	1.32282	1.61253	1.17924	1.42752	1.55119	1.41263	1.15762	1.03739	0.945142	1.10649	1.07233	1.02467						1.20833	0.0484762	0.205667
	1.22504	0.900499	1.49084	0.937656	1.06535	1.18629	1.30452	1.40644	1.29104	1.65818	1.64636	1.3463	1.11207	0.986658	1.02485	1.37177	1.0043	0.970246						1.21825	0.0558061	0.236765
	1.62708	1.7137	0.745425	1.68928	1.31958	1.40192	1.28273	1.78019	1.07067	1.31534	1.34297	1.12932	1.21002	1.08625	0.794018	1.16557	1.16627	1.08851						1.27382	0.0686194	0.291127
	2.27132	1.18665	1.08373	2.12136	1.14433	1.58324	0.973819	1.03878	1.09132	1.21343	1.18512	1.25927	1.40813	1.10688	1.39445	0.941948	0.953087	0.875619						1.26847	0.0902314	0.382819
	2.18905	1.1332	1.48116	1.60023	1.10622	1.45782	0.935366	1.18799	1.2537	1.4288	1.35292	1.36446	1.09986	1.07296	0.949623	1.43167	1.09165	0.937236						1.28188	0.0717577	0.304442
	1.97643	1.07992	0.859711	2.35473	0.956349	1.24185	0.876318	1.89249	1.00387	1.40316	1.28121	1.51386	1.40801	1.27389	1.58804	0.860733	0.937022	0.894941						1.30014	0.102148	0.433375
	1.40921	1.7988	0.902414	1.68962	1.40398	1.3492	1.46953	1.50962	1.37232	1.38631	1.26184	1.42133	1.10478	1.25975	1.33573	1.11195	0.837268	0.844672						1.3038	0.0621755	0.263788
	1.0521	0.901429	1.32935	2.35883	1.6593	1.08775	1.17097	0.997278	1.24674	1.36816	1.31699	1.16114	1.32208	1.2301	1.07734	1.36365	1.16138	0.854965						1.25886	0.0787483	0.334101
	1.219	1.93322	0.969494	1.10842	0.882877	1.07345	1.05856	1.3492	0.929377	1.54842	1.30171	1.54826	1.38764	1.27112	1.27486	0.748709	1.3486	0.976277						1.21829	0.0676461	0.286998
	2.28962	0.985644	0.960028	1.69869	1.08081	1.25042	1.02379	1.15933	1.14433	1.66021	1.45723	1.69825	1.19147	1.09447	0.936794	0.852416	1.08439	0.770362						1.24101	0.0901567	0.382502
	1.46186	1.82396	1.06616	1.52528	1.68444	1.0967	1.12114	1.44191	1.30418	1.20514	1.25219	1.4163	1.1427	1.01531	1.5053	0.778147	0.880691	1.1802						1.27231	0.0643948	0.273204
	1.05191	1.5374	1.23427	0.936292	1.68572	1.2765	1.48505	1.10521	1.22972	1.24987	1.09642	1.63385	1.26368	1.02827	0.8926	0.993808	0.935293	1.24631						1.21568	0.0565678	0.239997
	1.42904	1.4412	0.723015	1.32155	1.43469	1.82234	0.987301	1.72436	1.06151	1.4697	1.34292	1.48271	1.14825	1.09084	0.860999	1.35617	1.28713	0.849392						1.26851	0.0701939	0.297808
	1.63961	1.15295	0.708745	2.05793	1.38245	1.57484	0.889159	0.959508	1.26709	1.672	1.51393	1.55289	1.22133	1.10346	1.44349	1.31156	0.90958	0.866202						1.29037	0.0824804	0.349935
	0.700182	1.98094	1.48444	2.6088	1.18312	1.8078	1.07832	0.963065	1.02519	1.59069	1.40187	1.38787	1.2433	0.990799	0.834558	1.01631	1.14455	1.3574						1.32218	0.108424	0.460006
	0.547739	1.39562	1.52625	1.99278	0.927499	1.21051	0.969298	1.25089	1.3249	1.3246	1.36592	1.16274	1.16082	1.18525	1.45772	1.35751	0.938097	1.03038						1.22936	0.0714854	0.303287
	1.6817	0.912385	1.31812	1.45492	1.2453	1.06805	1.22853	1.56722	1.01357	1.35042	1.23227	1.46068	1.20887	1.19333	1.60118	1.34759	0.970381	1.1824						1.27983	0.0510151	0.216439
	1.02764	1.16309	1.12838	1.55554	1.21127	1.10808	1.43575	1.87169	1.21076	1.3001	1.26575	1.60933	1.29045	0.950789	1.29897	1.30263	1.27895	0.917102						1.27368	0.0553978	0.235033
	1.02764	1.70493	0.849046	2.26971	0.946029	1.71775	1.14387	1.442	1.29686	1.23094	1.17902	1.37025	1.26266	1.13448	1.55402	0.960968	1.46536	0.892632						1.30268	0.0838604	0.355789
	1.09153	1.44505	1.4029	1.58387	1.00842	1.17951	0.976413	1.51319	1.18634	1.24637	1.22888	1.59924	1.20334	1.1375	1.37929	1.41806	1.38514	0.890008						1.27084	0.048902	0.207474
	1.38992	1.86203	0.948532	1.48105	0.960659	1.64959	1.08013	1.27715	1.39186	1.42988	1.23076	1.56772	1.24937	1.28305	1.51217	1.34648	1.15557	1.04077						1.32537	0.0570169	0.241902
	2.12098	1.13392	1.68929	2.05918	0.964547	1.18847	1.41169	1.19653	1.08796	1.33571	1.18763	1.72719	1.23205	1.05322	1.45418	0.829713	1.19777	1.04193						1.32844	0.084636	0.35908
