# Supplementary material for: Cholecystokinin modulates age-dependent thalamocortical neuroplasticity
Source: eLife journal article supplement (doi:10.7554/elife.101513), 2024-10-14
Supplement: data1 [file Figure S1D.xlsx]

## Sheet: ACSF
	210924-1-1	210924-1-3	210924-m2-1	210924-m2-3	210925-m2-1	210928-1	210929-3-1	210929-3-2	210929-3-3	210929-4-3	210929-4-2	210924-m2-4														mean	se	sd
	0.943941	0.970469	1.18983	1.02347	1.0416	1.01676	0.959677	1.01337	1.0225	1.01346	1.058	1.09026		n=12												1.02861	0.0188517	0.0653041
	1.11497	1.05296	1.02687	1.04549	0.891702	0.996318	0.840564	0.976722	0.972618	1.02999	1.05618	0.978475		N=5												0.998571	0.0226054	0.0783074
	1.0316	0.992905	0.827546	0.868901	1.01971	1.06473	0.870561	0.985837	0.968583	0.962684	1.03222	0.887512														0.959399	0.022391	0.0775645
	1.07453	0.888383	1.12035	1.00408	0.896516	1.07249	1.01608	0.977951	1.01818	1.01711	1.00758	1.00917														1.00853	0.0202303	0.0700797
	0.9446	0.997145	0.929675	1.00965	1.09505	1.03368	1.05122	1.03616	1.00759	1.03788	1.02961	1.04544														1.01814	0.0135053	0.0467837
	0.811859	1.06532	1.08751	1.00819	1.09027	1.00555	1.12011	1.01053	1.03535	0.930547	1.01144	0.987473														1.01368	0.024744	0.0857157
	1.09907	0.955352	0.810397	1.06877	0.978064	0.920445	1.2236	0.972879	0.960676	1.02187	0.914452	0.986815														0.992699	0.0314733	0.109027
	0.97943	1.07746	1.00783	0.97145	0.987089	0.890031	0.918198	1.02655	1.0145	0.986464	0.890519	1.01485														0.980365	0.0167413	0.0579934
	1.99257	1.94255	1.74509	1.4516	1.52434	0.833678	0.587942	1.315	1.09111	1.35383	1.33541	1.30743														1.37338	0.124738	0.432104
	1.38036	1.72475	1.72395	1.23873	1.38238	0.823049	1.21694	1.34029	1.07583	1.24922	1.28391	1.37423														1.3178	0.0744128	0.257773
	1.1986	1.56776	1.39166	1.35639	1.27411	0.96174	1.58378	1.34131	1.07761	1.22402	1.22467	1.30174														1.29195	0.0540762	0.187326
	1.16928	1.26566	1.25998	1.19724	1.34093	0.822534	1.83391	1.4313	1.13601	1.27028	1.20974	1.32992														1.27223	0.0698996	0.242139
	0.996326	1.19391	1.3845	1.2496	1.19887		1.48524	1.39347	1.30076	1.23056	1.15422	1.39075														1.27075	0.0403097	0.139637
	1.34561	1.14103	1.35202	1.23769	1.01528		1.14912	1.3581	1.36132	1.20034	1.10478	1.46162														1.2479	0.0358714	0.124262
	0.924686	1.1369	1.44377	1.27181	1.10416		1.36049	1.34106	1.27317	1.13453	1.07592	1.33171														1.21802	0.0455211	0.15769
	1.27381	0.994533	1.26766	1.2418	1.24351		1.29095	1.26888	1.18699	1.17599	1.10044	1.27815														1.21116	0.0271072	0.0939022
	1.03495	1.21758	1.21176	1.10295	1.28954		1.14432	1.32443	1.39226	1.11402	1.21158	1.29119														1.21223	0.0316244	0.10955
	1.09724	1.16783	1.46086	1.11214	1.18955		1.26278	1.2434	1.40914	1.38522	1.10436	1.3455														1.25255	0.0387037	0.134074
	1.14206	1.36879	1.584	1.25292	1.02172		0.969711	1.31244	1.17817	1.17316	1.02671	1.45436														1.22582	0.0536363	0.185801
	1.46123	0.98943	1.33025	1.23258	1.12522		1.36999	1.33209	1.33779	1.1605	1.14822	1.41319														1.26368	0.0410536	0.142214
	0.91574	1.13874	1.4627	1.23005	1.0299		1.43144	1.39315	1.44436	1.2503	1.08682	1.42901														1.25566	0.0556644	0.192827
	0.838183	1.06363	1.23088	1.14891	1.27951		1.40213	1.40931	1.54389	1.22196	1.10482	1.2327														1.22508	0.0582102	0.201646
	1.02187	1.0821	1.30209	1.3526	1.1205		1.31445	1.43452	1.38578	1.28771	1.06988	1.36703														1.24896	0.0429356	0.148733
	1.19521	1.11472	1.16897	1.16343	1.19496	1.03645	1.47008	1.34392	1.72042	1.17059	1.10399	1.40152														1.25702	0.0569912	0.197423
	1.37554	1.02237	1.1041	1.28866	1.019	0.884354	1.69598	1.34872	1.53486	1.16239	1.105	1.19777														1.22823	0.0702339	0.243297
	1.28395	1.1352	1.29179	1.53115	1.02006	1.26792	1.12932	1.43061	1.42008	1.19984	1.05895	1.23493														1.25032	0.0468512	0.162297
	1.06717	1.08803	1.41236	1.36374	1.03666	1.03933	1.38625	1.45359	1.62809	1.17765	1.00874	1.2705														1.24434	0.0615454	0.2132
	1.19299	0.98907	1.51806	1.17359	1.02003	1.00157	1.69216	1.31355	1.42443	1.16641	1.04871	1.34711														1.24064	0.0669026	0.231758
	1.21679	1.27285	1.50909	1.14453	1.20642	1.12041	1.24512	1.36731	1.38031	1.24113	1.02105	1.32445														1.25412	0.038921	0.134826
	1.6866	1.16602	1.28071	1.16325	1.3338	0.802691	1.10886	1.39263	1.4932	1.24618	1.09374	1.26407														1.25264	0.0668992	0.231746
	1.59684	1.11338	1.4601	1.08523	1.1694	0.87579	1.5077	1.3642	1.60695	1.33223	1.01175	1.34614														1.28914	0.0715593	0.247889
	1.21954	1.65414	1.33715	1.26494	1.23934	1.01446	1.0403	1.31581	1.57896	1.29993	1.06066	1.43564														1.28841	0.0588529	0.203872
	1.0285	1.21533	1.29675	1.1322	1.38823	1.01055	1.14358	1.37788	1.90252	1.23197	1.09562	1.2816														1.25873	0.0718737	0.248978
	1.18325	1.44791	1.4993	1.188	1.22791	0.828751	1.17559	1.36886	1.58551	1.46924	1.06865	1.32179														1.2804	0.0640924	0.222023
	1.50548	1.25615	1.4588	1.27463	1.1447	0.791892	1.31618	1.52063	1.40514	1.20623	1.15895	1.26916														1.27566	0.0601926	0.208513
	1.38135	1.6183	1.31144	1.35845	1.02694	0.867845	1.35866	1.39597	1.66993	1.47862	1.17906	1.26264														1.32577	0.0681853	0.236201
	1.08935	1.48802	1.37162	1.1523	1.15728	1.07416	1.38941	1.4301	1.60861	1.25301	1.08812	1.30564														1.28397	0.0533654	0.184863
	1.08621	1.10628	1.42959	1.17985	1.25161	0.918066	1.48848	1.38276	1.72681	1.39204	1.11789	1.27166														1.27927	0.0661084	0.229006

## Sheet: L365260
	210924-1-1	210924-1-3	210924-1-4	210924-3-1	210924-3-2	210924-3-3	210924-3-4	210924-m2-1	210924-m2-2	210924-m3-3	210924-m4-4	210925-2	210925-3	210925-4	210925-1	210928-1-1	210929-1-2	210929-1-3	210929-1-4	210929-2-2	210929-2-3	210929-2-4
	1.09394	1.00492	1.05074	0.967861	0.939266	0.945936	0.971675	0.943926	1.00756	0.957363	1.00458	1.04223	1.03042	1.05809	0.991821	1.09638	0.85793	1.16956	0.992535	1.06634	1.00199	1.02055		n=22			1.0098	0.0662086	0.0141157
	0.945836	1.04322	1.01659	1.02005	0.854541	1.047	1.003	0.970176	1.02299	1.03622	0.999438	1.05861	1.03357	1.03749	0.975072	1.02956	0.886711	1.03467	0.964709	1.0872	1.04148	0.961504		N=5			1.00316	0.055599	0.0118537
	1.04632	1.02809	1.04364	0.95394	0.90579	0.955884	1.01631	0.97303	0.996377	1.03433	0.985973	1.08019	0.975551	1.05039	1.03311	1.06231	0.972521	1.12697	1.00631	1.03628	0.985988	0.957648					1.01032	0.0500428	0.0106692
	1.13043	1.014	1.03579	1.0357	1.04859	0.930604	0.965981	0.988461	1.01633	0.971215	0.997982	0.954933	1.03489	0.918314	0.937401	1.01694	1.14486	0.889978	1.0047	0.998412	1.13192	0.9704					1.00626	0.0668995	0.014263
	0.898071	0.937974	0.942337	0.989697	1.01212	1.0465	1.0245	1.02845	0.958555	1.02348	1.0032	1.01277	0.967319	1.05566	1.0395	1.09938	1.126	1.06235	1.00207	0.836622	0.873241	1.01551					0.997968	0.0697307	0.0148666
	1.01893	0.974055	0.972181	1.04777	1.03472	1.03626	1.01853	1.01339	1.00191	0.961504	0.97806	0.950371	1.07319	0.963841	1.02501	0.81559	1.14112	0.970667	1.0173	1.02902	0.884497	1.0223					0.997738	0.0649178	0.0138405
	0.945144	0.979451	0.921654	0.938069	1.06919	0.979369	0.991725	1.05111	1.00472	1.00335	1.02412	0.952783	0.920183	0.918047	1.00855	1.03176	0.92587	0.808133	0.99355	1.05801	1.07308	1.03863					0.983478	0.0635666	0.0135524
	0.921334	1.01829	1.01708	1.04691	1.13578	1.05845	1.00828	1.03146	0.991563	1.01254	1.00665	0.948115	0.964879	0.998168	0.989536	0.848081	0.944983	0.937674	1.01883	0.888109	1.0078	1.01345					0.991271	0.0608153	0.0129659
	1.18155	1.47855	1.54035	0.991593	1.08971	0.923777	0.929317	1.3341	0.953333	1.34929	1.28184	0.909185	0.83983	0.862798	0.978378		1.08008	1.10247	0.869447	0.944469	0.874911	0.963454					1.0704	0.211097	0.0450061
	1.09863	1.29492	1.31862	0.978288	1.05679	0.976081	0.957817	1.29294	1.03978	1.61852	1.30615	0.860021	0.974131	0.847889	0.93196		1.09709	0.913245	0.890647	1.00921	1.07273	0.952753					1.07087	0.193267	0.0412047
	1.0131	1.50282	1.0811	0.991455	1.02094	0.952506	1.02381	1.22798	1.03839	1.48709	1.19054	0.834222	0.870179	0.883723	0.911715		1.13244	0.839282	0.911596	0.977667	0.993273	0.978456					1.04106	0.183353	0.0390909
	0.942662	1.29428	1.13915	0.941175	1.01298	0.876285	1.08005	0.989226	1.01417	1.39892	1.10289	0.986437	0.839539	0.852782	0.903245		1.00862	0.813218	0.880422	0.814095	1.16498	1.02722					1.00392	0.153795	0.0327893
	0.866922	1.1683	1.05656	0.93918	0.929493	1.05521	1.01001	1.15751	0.945559	1.14226	1.171	0.900612	0.939578	0.809198	0.92973		0.853392	0.871353	0.981299	0.950721	0.800486	1.05349					0.977708	0.115377	0.0245984
	0.883799	1.29863	1.0253	1.0578	0.989524	0.976172	1.00132	1.03645	1.04479	1.11203	1.11611	1.08165	0.898039	0.868206	0.966893		1.11382	1.03325	0.916738	0.815768	0.984472	1.0942					1.015	0.107603	0.022941
	0.821338	1.0889	1.09426	1.05144	1.18154	0.961477	0.983242	1.0007	0.967933	1.10074	1.11584	0.983504	0.836797	0.893115	0.96976		1.04395	1.03435	0.981905	0.860031	1.0687	1.07081					1.00525	0.0954205	0.0203437
	0.857426	1.14149	1.08337	1.09202	1.04042	0.975693	0.961296	1.07213	0.99871	0.965583	1.15661	0.876656	0.897184	0.899049	0.953109		0.97748	1.05974	0.942104	0.95169	0.894657	1.06791					0.993539	0.0875135	0.0186579
	0.766076	1.28789	0.992235	1.02748	1.07761	1.07736	1.0038	1.04182	0.968651	1.09044	1.14646	1.0247	0.831288	0.837412	0.984847		1.03756	1.05223	1.0091	0.9211	0.972677	1.12088					1.01293	0.1142	0.0243475
	0.811606	1.10552	0.89711	1.10594	1.16323	0.906907	1.03039	0.991971	1.09921	0.995771	1.16504	1.00108	0.919561	0.836781	0.930479		1.11759	1.09936	1.00063	0.982493	0.848124	1.04698					1.00266	0.106984	0.022809
	0.816903	1.11324	0.930826	1.10275	1.16131	0.980255	1.14356	1.12659	0.969908	1.02945	1.15706	0.89503	0.923424	0.868911	1.08058	0.859688	1.0539	1.0156	0.903191	0.969598	1.01388	1.11762					1.0106	0.106105	0.0226217
	0.710064	1.18339	0.901737	1.09322	1.1839	1.03541	1.17884	1.01437	0.945354	1.04071	1.1639	0.890611	0.903424	0.856115	0.963512	1.1363	0.918613	1.13613	0.992726	0.915206	1.00007	1.10965					1.01242	0.126819	0.0270378
	0.734356	0.931096	0.819709	1.10695	1.02597	0.97451	1.07196	1.11509	1.07459	1.17826	1.12434	0.854497	0.890171	0.911426	1.03334	0.868322	0.946696	1.13265	0.979969	0.888676	0.875	1.14322					0.985491	0.122683	0.0261561
	0.868736	1.04578	0.897825	1.06753	1.05516	0.969612	1.07487	1.06774	1.0187	1.14204	1.12168	0.987941	0.84986	0.796756	0.999934	0.9564	0.984918	0.946825	1.03342	0.811707	1.04417	1.15331					0.995223	0.101017	0.0215369
	0.947619	1.08735	0.958647	1.08886	0.994833	0.98818	1.05961	1.05846	1.00356	1.22247	1.15469	1.00809	0.874302	0.807098	1.07578	0.880168	1.03521	1.1469	1.07739	0.928386	1.0017	1.16022					1.02543	0.102146	0.0217775
	0.864103	1.0614	1.167	1.15301	1.06551	0.996333	1.17315	1.03836	0.96997	1.26185	1.09694	1.00739	0.830139	0.916993	1.03489	0.921269	1.17297	1.12113	0.993323	0.843966	1.05182	1.14385					1.04024	0.117129	0.024972
	0.923088	0.99956	0.808221	1.01417	1.04763	0.964292	1.11803	1.07342	1.07268	0.960697	1.1282	0.931655	0.887105	0.798154	0.983423	0.914685	1.08424	1.00204	1.02833	1.02705	1.08427	1.12636					0.998967	0.0942162	0.020087
	0.799733	0.86513	0.868548	1.04238	1.05031	1.13131	1.12316	0.963863	1.01732	1.01306	1.16276	0.92307	1.01058	0.884486	0.966569	0.829723	1.03275	1.02707	1.04095	0.960034	0.998543	1.13154					0.992859	0.100316	0.0213874
	0.818747	0.855004	0.749434	1.04544	1.11813	0.924832	1.16035	1.12839	0.944146	1.10465	1.10136	0.916344	0.953878	0.971743	0.925908	0.949981	1.05216	1.08838	1.02077	0.892863	0.871619	1.14					0.987915	0.115077	0.0245345
	0.846801	0.772403	0.887608	1.06202	1.10585	1.02577	1.13251	1.17496	1.04404	1.15746	1.04587	0.832251	0.944537	0.981243	0.984272	0.95276	0.958968	1.22978	1.04446	0.959015	0.998625	1.13994					1.01278	0.117271	0.0250023
	0.768225	0.947211	0.673828	1.10499	1.00809	1.00101	1.15655	1.03534	0.933933	1.02199	1.08627	0.878596	0.968803	0.876869	0.987293	0.822442	1.0252	1.30349	1.06851	1.01695	1.0135	1.17023					0.99406	0.138134	0.0294502
	0.82331	0.893897	0.847182	1.00821	0.976872	1.07147	1.16565	1.02656	1.04501	1.24461	1.04411	0.8575	0.927271	0.994034	0.997169	0.973147	0.913802	1.16232	1.06439	1.00335	1.19542	1.10168					1.01532	0.113631	0.0242263
	0.853809	0.863727	0.778545	1.03721	1.04829	0.999181	1.15041	0.995625	0.935194	1.0898	1.13444	0.883212	0.925585	0.887142	0.97732	0.823942	1.17505	1.1483	1.02237	0.950731	1.1547	1.14851					0.999232	0.121625	0.0259304
	0.742361	0.750673	0.781423	1.0888	0.89926	0.938214	1.14452	0.986233	0.986647	1.08101	1.08831	1.08019	0.897311	0.867022	0.927201	0.87815	1.06361	1.16434	1.04963	1.01567	1.12527	1.17221					0.987639	0.131717	0.0280823
	0.832087	0.746909	0.730287	1.12934	1.01026	0.988699	1.1291	1.00622	0.999169	1.14496	1.06359	0.918618	0.9088	0.985863	0.979019	0.699354	1.1021	0.940729	1.07395	1.09584	0.942649	1.17964					0.982144	0.135721	0.0289358
	0.738548	0.736228	0.736552	1.05276	1.22659	0.928833	1.14285	1.14449	1.07939	1.21718	1.10041	0.85176	0.916264	0.946086	0.986319	1.01082	1.11531	1.0869	1.05754	0.914121	0.99216	1.19239					1.00789	0.14973	0.0319226
	0.906229	0.708305	0.68703	1.10822	1.21305	0.96926	1.14882	1.025	1.0732	1.02403	1.128	0.895517	0.851712	0.883691	0.946556	0.80932	1.0021	1.24463	1.03756	1.0511	0.993102	1.18195					0.994926	0.150724	0.0321345
	0.872431	0.731419	0.695324	1.02635	0.964951	0.978135	1.12003	1.07293	0.993732	1.21262	1.09072	0.874832	0.889334	0.879598	0.969441	0.98811	0.951407	0.975317	1.07821	1.0177	0.947803	1.18113					0.977797	0.126193	0.0269045
	1.06754	0.758123	0.752111	1.0146	1.14049	0.90576	1.17278	1.22793	0.979956	1.36267	1.11727	0.869031	0.869617	0.847658	0.953624	0.917297	1.14481	1.18472	1.07137	0.986787	1.20719	1.19668					1.034	0.163841	0.0349309
	0.730934	0.843508	0.695904	1.00161	1.04599	1.13222	1.15278	1.18235	0.999488	1.17957	1.0908	0.929023	0.930769	0.851132	0.93518	0.88416	1.0161	1.10265	1.08609	1.09969	1.0249	1.20346					1.00538	0.142291	0.0303366
