# Supplementary material for: Cholecystokinin modulates age-dependent thalamocortical neuroplasticity
Source: eLife journal article supplement (doi:10.7554/elife.101513), 2024-10-14
Supplement: data1 [file Figure S2A.xlsx]

## Sheet: Sheet1
	220315-2-2	220315-2-3	220317-1-1	220317-1-2	220317-1-3	220317-1-4	220317-2-1	220317-2-2	220317-2-3	220317-2-4	220318-1-1	220318-1-2	220318-1-3	220318-1-4	220319-1-2	220319-1-3	220322-1-3	220322-1-4	220322-2-1	220322-2-4
	1.02088	1.00909	1.05108	1.00021	0.9906	1.06426	0.973222	0.964392	0.985303	1.03524	1.05417	1.02415	0.979173	1.06719	0.996965	1.03014	0.918619	0.904527	0.972858	1.02612						1.00341	0.00988036	0.0441863
	0.973477	0.989896	0.946666	0.979062	0.976657	0.948073	1.09041	1.0255	1.1365	1.08403	1.04828	1.06048	1.08083	1.01318	1.00441	1.05637	1.06346	1.02699	1.07852	0.915371						1.02491	0.0129185	0.0577734
	1.00704	0.998512	0.985876	1.01873	1.0185	1.00685	1.14264	0.848757	0.990754	0.929349	1.05495	1.00536	0.980863	1.05684	1.06615	1.1043	0.976076	1.02932	1.04001	1.09391						1.01774	0.0142115	0.0635559
	1.00321	1.00019	0.993502	0.980984	1.0222	0.978154	1.09577	0.983948	0.986991	1.01305	1.00282	0.979583	1.04027	0.993985	1.01818	0.888096	1.02252	1.03984	1.05244	1.03728						1.00665	0.00909569	0.0406772
	0.972224	0.979108	1.06365	1.02267	1.04092	1.02828	0.61314	1.07671	0.872844	0.76419	0.970129	1.01673	1.01419	0.980868	0.995254	0.970963	1.06204	0.997867	0.961979	1.05085						0.97273	0.0246653	0.110307
	0.997873	1.01794	0.941938	0.968522	0.948158	0.941367	0.914671	1.1921	0.855086	0.982476	0.906228	0.911806	0.955507	1.01081	0.963558	1.03494	1.04872	1.03144	0.913457	0.95257						0.974458	0.0160242	0.0716624
	1.03641	1.02756	1.00575	1.01428	1.01849	1.02542	1.0902	0.803923	1.08214	1.10332	0.98335	1.02323	1.01006	0.976181	1.04207	1.03498	0.890242	0.930308	0.968002	0.939215						1.00026	0.0156788	0.0701178
	0.988881	0.977698	1.01155	1.01554	0.984482	1.00759	1.07995	1.10467	1.09038	1.08834	0.980069	0.978671	0.939106	0.900945	0.913423	0.880204	1.01833	1.0397	1.01273	0.984689						0.999847	0.0138737	0.0620449
	0.99972	1.0005	1.00328	1.0004	1.00285	0.996163	0.958744	1.03227	0.977488	0.990275	0.96852	0.982004	0.991827	0.972557	0.986495	0.961836	1.00837	1.00783	0.981721	0.992921
	1.18221	1.08635	0.932572	0.926506	0.952137	0.926021	1.12837	1.01476	1.05592	1.00963	1.02449	1.08768	1.04744	1.03782	1.08961	0.936101	1.05637	1.08234	0.886049	0.953648						1.0208	0.0176816	0.0790747
	1.17757	1.07762	1.02888	0.960593	0.991729	0.911857	0.968434	1.01923	1.08888	1.14308	0.996386	1.04908	0.965688	0.992072	1.02697	0.953649	0.991925	0.953631	0.943461	0.957069						1.00989	0.0153344	0.0685777
	1.15962	1.06441	0.978218	0.999331	0.993432	0.998329	1.12845	0.81874	0.910334	1.20457	0.93956	1.00936	0.927291	0.97285	0.932369	0.917596	0.924281	0.918987	0.967283	1.0026						0.988381	0.0205959	0.0921075
	1.1183	1.06884	1.03672	1.03793	1.01606	0.970699	0.956506	0.757888	1.08736	0.805985	0.920966	0.957337	1.05582	0.963845	0.973189	0.880124	0.939294	1.05503	0.984742	0.940277						0.976345	0.0202172	0.0904141
	1.1165	1.07417	1.00157	0.970931	0.953766	0.969783	0.94484	1.09748	1.08658	1.08404	1.02663	1.06135	1.03627	1.06793	0.961299	0.854926	1.06053	1.09575	0.937038	1.05608						1.02287	0.015602	0.0697744
	1.16936	1.09449	0.969261	0.929561	0.908842	0.881371	0.96274	1.20829	0.930129	1.02608	1.02348	1.04734	0.943716	0.993552	1.13412	1.00846	0.997104	1.06091	1.02014	0.920599						1.01148	0.0197412	0.0882853
	1.14537	1.0734	1.00037	0.974736	0.955901	0.917718	0.997377	0.872606	0.924185	1.11071	0.962184	0.937951	0.936523	0.985074	1.1495	0.914974	1.07139	1.07031	0.925156	1.01286						0.996915	0.0181255	0.0810598
	1.13429	1.06702	0.947105	1.00757	1.00551	0.977108	0.930066	1.04433	0.987619	0.956802	0.929942	1.01501	0.982603	0.866031	0.998873	0.911347	1.09396	1.00568	1.0082	0.895709						0.988238	0.0147872	0.0661304
	1.19016	1.04292	0.982583	0.880135	0.846471	0.986121	1.17199	0.846575	0.926908	0.87314	1.01076	1.02451	0.964456	0.990805	0.813098	0.838373	0.933759	0.985608	0.840904	0.973066						0.956117	0.0232962	0.104184
	1.15749	1.06126	0.901653	0.941424	0.854922	0.892697	1.07197	1.00113	0.797745	1.02327	0.969073	0.971033	1.00455	0.904903	0.855374	1.05777	1.05144	0.996181	0.967479	0.8504						0.966588	0.0205026	0.0916904
	1.1084	1.07867	0.904594	0.988866	0.971179	0.929131	0.889411	0.898102	0.994703	0.791827	0.966825	0.975674	1.06957	0.853517	0.920508	0.893088	0.993524	1.05614	0.830056	0.992846						0.955331	0.0189844	0.0849009
	1.09419	1.04357	1.06772	1.003	0.944	1.06641	1.07248	0.781997	1.0497	0.759777	0.951631	0.930219	1.1053	0.971276	0.855028	1.06563	0.849067	0.8971	0.993953	0.864502						0.968328	0.0236208	0.105635
	1.16564	1.09581	0.925786	1.06329	0.970828	0.866856	0.923903	0.847937	0.912975	0.839419	0.937421	1.02687	1.05981	1.023	0.969004	0.986639	1.0488	1.10027	0.846615	0.967017						0.978895	0.0208382	0.0931912
	1.11927	1.05443	1.08489	0.902081	1.08072	0.898888	1.13923	0.871437	0.79832	0.908366	1.01385	1.01651	1.02448	1.0481	0.964869	0.98406	0.918055	0.965366	0.97021	1.01439						0.988876	0.0196754	0.0879909
	1.18095	0.993072	0.91834	0.922356	0.895953	0.961247	1.11393	0.911474	0.928659	0.929348	0.960078	1.06672	0.893649	1.03035	0.97636	0.809543	0.850875	0.96845	0.968076	1.01417						0.96468	0.0194211	0.0868536
	1.15992	1.03064	1.08442	0.979988	1.05645	0.927091	1.09588	0.911572	1.10516	0.972478	0.924914	0.952276	0.97804	1.01933	1.04587	0.822816	1.05654	1.05885	0.999893	1.01415						1.00981	0.0176647	0.0789989
	1.08724	0.999899	1.01276	0.96705	0.91663	0.969895	1.23947	0.86163	1.07919	0.811346	0.861308	0.913865	0.923945	0.847995	0.912271	0.892842	0.955504	0.958471	0.96123	1.04443						0.960848	0.0221429	0.0990263
	1.12531	1.06412	0.995969	0.948601	0.967366	1.00228	0.954969	0.937314	0.802951	1.10116	0.970053	1.00775	0.960378	0.978763	0.890641	1.05244	1.00178	1.00679	1.03551	1.10467						0.995442	0.0168664	0.0754287
	1.11457	1.07078	0.968499	1.0557	0.963726	0.996991	1.04681	1.10307	0.889898	1.12057	0.937163	0.938577	0.873239	0.941868	0.855011	0.952445	0.955128	0.97754	1.0758	1.02669						0.993204	0.0178837	0.0799782
	1.17306	1.08147	1.06261	1.03475	0.999596	1.01385	1.09081	1.0875	0.972817	0.997128	0.895472	0.984825	1.063	1.03839	1.0346	1.13101	0.956001	0.995614	1.02007	1.1153						1.03739	0.0146181	0.0653742
	1.20803	1.02633	1.04335	1.04287	1.02786	0.913061	1.07799	0.871235	0.963237	0.78874	0.883275	1.00185	0.972479	0.896147	0.934262	0.878003	0.99943	1.10616	1.01685	1.02344						0.98373	0.021512	0.0962045
	1.20753	1.06185	1.06337	0.95852	1.05107	0.899055	0.904598	0.990149	1.03411	0.832889	0.886059	1.06614	0.996414	0.896362	0.928489	0.827123	0.980631	0.983512	1.0127	1.04368						0.981213	0.0206784	0.0924765
	1.14219	1.08348	0.954678	0.895059	0.898503	1.04856	1.00178	0.895419	0.883423	1.01577	0.957994	0.963355	1.01806	0.962778	1.00046	0.972565	0.970282	1.01192	0.935337	0.964516						0.978807	0.014577	0.0651904
	1.15858	1.02967	1.0852	1.08379	0.85933	0.978908	1.19876	1.06764	1.05529	0.837151	1.0144	0.90563	0.973588	0.927623	0.974399	0.799072	1.01187	0.973199	0.985324	1.0181						0.996876	0.0224476	0.100389
	1.14632	1.03578	1.03424	1.0372	1.06085	0.972833	0.928183	0.889431	0.855333	0.845319	0.965381	0.968258	0.923428	0.867543	0.930232	0.869252	0.963665	0.942837	0.975891	0.975535						0.959376	0.0171879	0.0768666
	1.16096	0.98505	1.08382	0.979572	1.04734	1.02992	0.973442	0.9024	1.04245	1.11788	0.912074	0.966677	0.936853	0.913874	0.880219	0.873858	0.867738	0.928974	0.99292	1.02458						0.981031	0.018435	0.082444
	1.14652	1.09614	1.01907	1.08195	1.05124	1.03171	1.03834	0.871304	0.844519	0.815045	0.918227	1.01197	1.00977	0.942778	0.918302	1.13829	1.00436	1.00905	0.974944	0.990469						0.9957	0.0201498	0.0901125
	1.18677	1.07672	1.04682	1.02721	0.994559	1.0249	1.06343	1.01882	0.806866	0.792919	0.950057	1.04184	1.02964	0.934945	0.983394	0.87616	0.979673	1.0089	0.980974	1.02448						0.992454	0.0201439	0.0900862
	1.20902	1.06581	1.09595	0.959049	0.88714	1.00659	1.05125	0.877761	0.961967	0.827011	0.960591	1.04181	0.916171	0.876433	1.07102	0.889756	0.956575	1.02833	1.03519	1.07504						0.989623	0.0212021	0.0948189
	1.19329	1.06053	1.00223	0.961787	1.0879	0.943512	1.01902	1.12409	1.06333	1.09819	1.00072	0.958061	0.877753	0.890805	1.03991	0.875688	0.888281	0.918894	0.964797	1.00754						0.998816	0.0197896	0.0885019
