# Supplementary material for: Cholecystokinin modulates age-dependent thalamocortical neuroplasticity
Source: eLife journal article supplement (doi:10.7554/elife.101513), 2024-10-14
Supplement: data1 [file Figure S2B.xlsx]

## Sheet: Sheet1
	220224-1-1	220224-1-4	220224-2-1	220224-2-2	220224-2-3	220224-2-4	220326-1-1	220326-1-2	220326-1-3	220326-1-4	220326-2-1	220326-2-2	220326-2-3	20220331-1-1	20220331-1-4	20220331-2-1	20220331-2-2	20220331-2-3	20220331-2-4	20220407-1-3
	1.02646	0.851973	1.08211	1.04528	1.02573	0.922738	0.97637	0.840225	1.03246	0.992313	1.00451	1.05233	0.961341	0.978913	0.980579	0.976029	0.937242	0.95571	1.03612	0.982547						0.983049	0.0131833	0.0618349
	0.826774	1.10558	0.960354	0.944557	1.10737	0.954997	0.990469	0.903579	1.0082	0.992788	1.03094	1.02644	1.05113	1.02469	1.0813	1.00127	1.01793	0.988469	1.01651	0.966441						0.999989	0.0140237	0.065777
	1.0181	0.803619	0.838486	0.906714	0.930415	1.03563	0.943102	1.09612	1.06676	0.988992	0.964972	0.99726	0.976963	1.01771	0.911035	1.0268	1.0637	1.05332	0.92666	1.22388						0.989511	0.0200336	0.0939657
	1.15245	1.12407	1.07204	0.99103	1.0612	1.03413	1.05065	1.06469	1.09641	1.01241	0.970516	0.990917	1.05276	1.02161	0.863641	0.985549	0.903341	0.953134	0.975754	0.857423						1.01169	0.0167834	0.0787211
	0.897443	0.999366	1.14346	1.04668	0.908744	1.06037	0.987532	1.0903	1.08047	1.00373	0.914234	0.963917	0.965578	0.919114	1.03059	1.00897	1.0153	0.99813	0.972677	1.00728						1.00069	0.013702	0.0642683
	0.852621	0.969726	1.07424	0.995423	1.00669	0.98989	1.0268	0.955357	0.89357	1.01508	1.0477	0.962916	0.975825	1.01853	1.08184	1.02186	1.04133	1.00223	1.03452	1.21222						1.00892	0.0155202	0.072796
	1.11918	1.05864	0.783733	1.08248	0.941055	1.0256	1.03911	1.0375	0.995756	1.00243	0.968332	1.01007	1.03125	1.11174	1.06734	0.992222	0.997495	1.01925	1.03583	0.866493						1.00928	0.0166035	0.0778773
	1.10697	1.08703	1.04558	0.987835	1.0188	0.976645	0.985964	1.01223	0.826376	0.992257	1.09879	0.996149	0.98516	0.907694	0.983679	0.987309	1.02367	1.02976	1.00192	0.883724						0.996877	0.0143778	0.0674378
	1.02573	1.04777	1.02381	1.02069	0.987299	1.01733	1.01801	1.03202	0.978518	1.00518	0.999914	0.984794	1.00211	0.995737	1.00542	0.999181	0.996226	1.0005	1.00414	0.965426
	1.34334	0.999238	0.745576	0.86389	0.882222	0.858882	0.886067	1.11256	0.606162	1.03001	1.12816	0.985257	1.02939	1.29241	0.870865	1.0455	1.07324	1.06578	0.944034	0.86025						0.981142	0.036719	0.172227
	0.928931	1.27007	0.67455	1.05051	0.852425	1.31616	0.970599	1.0199	0.649329	1.04942	1.04722	1.0473	1.02809	1.24326	0.850051	1.08361	0.987813	1.05812	1.02194	1.02419						1.00867	0.0356706	0.16731
	1.43934	0.614957	1.18753	1.07262	1.248	0.741251	1.05209	0.972527	0.575815	0.982797	1.07703	1.08417	1.01869	0.990782	0.963068	1.07895	0.991465	0.940736	0.938914	0.736567						0.985365	0.0434005	0.203566
	1.59514	0.94124	0.980675	0.945513	0.92781	1.02901	0.998985	0.981726	0.800304	1.00182	1.08819	1.06116	0.923265	1.25746	0.79578	1.04417	0.875426	0.978306	0.99127	1.13339						1.01753	0.0366777	0.172034
	1.39191	1.05377	0.994872	0.742541	0.903922	1.14395	1.01049	0.857051	0.569438	1.03075	1.14609	0.954464	0.918154	1.30951	0.93196	1.00273	0.950365	1.00495	1.06722	1.11254						1.00483	0.0381817	0.179088
	0.769249	1.15828	1.00575	0.854106	0.903484	1.2112	1.01312	1.15267	0.579134	1.03071	1.13717	1.05355	0.928079	1.30116	0.918875	1.06876	0.954812	0.995578	0.963423	0.930369						0.996474	0.0343063	0.160911
	0.784797	0.764314	0.62124	0.959233	1.20135	0.999939	1.00343	1.06769	0.986669	1.0183	1.11464	0.94274	0.933997	1.28539	0.887924	1.05802	0.920144	0.985793	1.03328	1.07294						0.98209	0.0315989	0.148212
	0.829038	1.11441	0.975521	0.893358	1.07785	0.854341	1.03515	1.12162	0.763913	1.01127	1.04915	1.05346	0.862261	1.18959	0.837953	0.969222	0.922306	1.03623	1.00725	0.945057						0.977447	0.0240166	0.112648
	1.47988	0.58445	0.90925	0.764992	0.935913	0.893293	1.06181	0.982076	0.963396	1.06157	0.957118	1.06588	0.889896	1.26135	0.846638	1.05167	0.975274	1.00717	0.964561	1.23378						0.994499	0.0397346	0.186372
	0.522046	0.686876	1.304	1.23467	1.07361	1.15846	0.982217	1.19162	0.574508	1.02976	0.959165	1.01946	0.892232	1.23462	0.868377	1.03307	0.951229	1.06888	1.00054	1.08495						0.993514	0.0444015	0.208261
	0.656333	0.881482	0.601604	1.04937	1.23142	0.991574	1.04389	1.01029	0.75503	1.01292	1.10588	0.984814	1.02416	1.19688	0.914537	1.02989	0.943057	0.988168	1.03793	0.960337						0.970978	0.0330896	0.155204
	0.998753	1.03613	0.870152	1.16777	1.06522	0.919218	1.05869	1.30612	0.956512	1.00393	0.980378	0.923165	0.884761	1.13942	0.925401	1.07113	0.983557	0.985481	0.946423	1.0946						1.01584	0.022577	0.105896
	0.823363	0.649668	1.20446	0.883598	1.23874	1.02096	0.936379	0.980806	0.622239	1.00236	0.930263	0.930038	0.902061	1.18041	0.915958	1.08354	0.913611	0.957374	0.980598	1.12877						0.964259	0.0339037	0.159022
	0.95471	0.617614	0.76158	1.15464	0.999826	1.33656	0.979882	1.09632	0.882471	1.00659	1.1111	1.04553	0.9252	1.19567	0.847725	1.06173	0.955926	0.966641	1.03163	1.08987						1.00106	0.0332902	0.156145
	0.492642	0.593608	1.01908	0.78847	0.884564	1.10225	1.06994	1.25408	0.953537	1.00127	0.984598	1.07193	0.961114	0.981505	0.884638	1.02794	0.914285	0.997343	1.05518	1.06597						0.955198	0.0365703	0.17153
	1.09396	0.72966	0.701076	1.10088	1.09587	1.07894	0.941795	1.18152	0.837118	0.951563	1.0608	0.929021	0.905692	1.18223	0.943589	1.02876	0.963876	1.04326	0.992137	1.22093						0.999134	0.02971	0.139352
	1.54399	0.717262	0.992305	0.821958	0.77012	0.855657	0.891182	1.11306	0.958128	0.946242	1.10075	0.980998	0.907505	1.13258	0.913128	1.05535	0.968265	1.0886	0.94166	0.9467						0.982272	0.0368183	0.172693
	1.2749	1.26959	0.971365	0.853762	1.20697	1.15995	1.11874	1.28873	0.804646	1.02491	1.06331	0.993652	0.933476	1.05195	0.844436	1.04049	0.942935	1.02257	0.963866	0.936763						1.03835	0.0306153	0.143598
	1.00896	0.878749	0.801504	1.21216	0.721274	1.1579	1.10071	1.1615	0.780947	1.06521	1.00631	1.01675	1.02265	0.965121	0.952198	1.04235	0.885364	0.921779	1.02375	0.875157						0.980016	0.0278335	0.130551
	0.653222	0.631371	1.04866	1.13993	0.769317	0.876514	0.991385	1.22704	0.736937	1.00587	1.05842	1.05884	0.90581	1.06113	0.850468	1.06574	0.954659	1.01942	0.95483	1.14938						0.957947	0.034758	0.163029
	1.55508	0.708885	0.775105	0.971179	1.21971	0.815522	0.949251	1.16335	0.647658	0.94795	1.06401	1.03044	0.872834	0.925014	0.865486	1.04801	0.922402	1.01301	0.953601	0.727477						0.958798	0.0431577	0.202428
	1.13171	0.855123	1.33139	0.899455	1.24179	0.751262	1.05874	1.21391	0.877969	0.956991	1.13199	0.980406	0.869398	0.807037	0.906505	1.03309	0.976459	0.945801	0.934483	1.03186						0.996768	0.0322621	0.151323
	1.36802	1.2067	0.815829	0.96273	0.970009	1.03556	0.973429	1.42095	0.951669	0.963951	1.05684	0.924632	0.98755	0.974731	0.901477	1.01329	0.953139	1.03748	1.02388	0.737618						1.01397	0.0340937	0.159914
	1.18113	0.772901	0.75519	0.825072	0.814052	0.851011	0.98161	1.05279	0.749819	0.949627	1.00539	1.03428	1.04144	1.04893	1.01604	1.04841	0.920104	0.955022	1.00067	0.918471						0.946098	0.0251694	0.118055
	0.975232	0.976919	1.21999	0.907185	1.13482	1.10656	0.967924	1.08409	0.825448	0.956982	0.990258	0.970923	1.05498	1.09295	0.879662	1.03954	0.949833	0.925752	0.950668	1.06173						1.00357	0.0202127	0.0948061
	1.00109	0.757814	0.969871	1.19105	0.827098	0.811101	0.979295	1.11266	0.881912	0.932558	1.16087	0.957345	1.05092	0.869484	0.929063	0.985148	0.903213	0.95061	0.981577	1.16379						0.970823	0.0253104	0.118716
	1.36386	1.22514	0.799627	0.925858	1.32468	0.795698	0.921318	1.13545	0.905195	0.968906	1.07438	1.03876	1.04076	0.935642	1.03758	0.975902	0.983502	0.95318	0.978711	0.877333						1.01307	0.0324352	0.152135
	0.617996	0.974738	1.24764	0.796267	1.00344	0.933848	0.986591	1.34437	0.710331	0.934522	1.10526	1.03981	0.965589	1.01066	0.903294	0.983002	0.929016	0.987397	0.981442	0.829907						0.964256	0.0343524	0.161127
	1.04526	0.624166	1.12489	0.988978	1.21327	1.20378	1.04914	1.07866	0.870089	0.935766	1.17545	0.931722	0.983453	0.903049	0.922849	1.00262	0.948205	0.964503	1.05729	0.904471						0.996379	0.0286372	0.13432
	0.700019	1.34765	0.698176	1.12915	0.776115	0.950807	1.02464	1.41802	1.04813	0.954644	1.04677	1.0366	1.02411	0.869008	0.885892	0.995767	0.955317	0.982883	0.976105	0.838898						0.982936	0.0381445	0.178914
