# Supplementary material for: Cholecystokinin modulates age-dependent thalamocortical neuroplasticity
Source: eLife journal article supplement (doi:10.7554/elife.101513), 2024-10-14
Supplement: data1 [file Figure S2G.xlsx]

## Sheet: IP CCK_CCK-Cre
TimeStamp	M0128_re	Cre_M0815_1 side_re	Cre_M0816_2 side_re	Cre_M0902_1 side_re	Cre_M0902_2 side_re	Cre_M0908_1 side_re	Cre_M0909_1 side_re					N=n=7	SD	se
-119.956	-0.128781	-0.0662124	0.235103	0.190018	-0.366142	0.0796123	-0.142764					-0.0284524	0.195471	0.073881
-119.858	-0.131791	-0.0582076	0.237947	0.190887	-0.367504	0.0830714	-0.14366					-0.0270367	0.196867	0.0744086
-119.76	-0.134839	-0.0501284	0.239971	0.19198	-0.36864	0.0863948	-0.144458					-0.0256743	0.198116	0.0748809
-119.662	-0.138006	-0.0421084	0.241133	0.19329	-0.3695	0.0895591	-0.145248					-0.0244116	0.199213	0.0752955
-119.563	-0.141162	-0.0341403	0.24153	0.194827	-0.370285	0.0924773	-0.146098					-0.0232642	0.200216	0.0756746
-119.465	-0.144241	-0.0262177	0.24114	0.196584	-0.370969	0.095227	-0.147027					-0.0222149	0.201117	0.076015
-119.367	-0.147224	-0.0183105	0.239901	0.198637	-0.371561	0.097894	-0.147984					-0.0212354	0.20192	0.0763187
-119.268	-0.150101	-0.0103849	0.237845	0.201049	-0.372114	0.100527	-0.14891					-0.0202985	0.202659	0.0765977
-119.17	-0.15286	-0.00255852	0.235073	0.203865	-0.372575	0.103037	-0.149843					-0.0194087	0.203343	0.0768563
-119.072	-0.155377	0.00509112	0.231658	0.20719	-0.372898	0.105342	-0.150786					-0.0185401	0.203975	0.0770954
-118.973	-0.157693	0.0126247	0.227554	0.211034	-0.373139	0.107505	-0.151678					-0.0176847	0.204573	0.0773212
-118.875	-0.159784	0.0199767	0.222867	0.215415	-0.373398	0.10955	-0.152621					-0.0168564	0.205195	0.0775564
-118.777	-0.161693	0.0272369	0.217776	0.220336	-0.373516	0.111457	-0.153637					-0.0160058	0.205846	0.0778026
-118.678	-0.163372	0.0343839	0.212376	0.225786	-0.373467	0.113461	-0.154773					-0.0150864	0.20656	0.0780722
-118.58	-0.164853	0.0413402	0.20666	0.231786	-0.373245	0.115698	-0.156121					-0.0141051	0.207364	0.0783761
-118.482	-0.166124	0.0480696	0.200642	0.238278	-0.372856	0.11835	-0.157617					-0.0130368	0.208266	0.0787172
-118.384	-0.167201	0.0545241	0.194359	0.245233	-0.372403	0.121586	-0.159299					-0.0118857	0.209318	0.0791147
-118.285	-0.168111	0.0606239	0.187758	0.252657	-0.371968	0.12535	-0.161268					-0.0107081	0.210544	0.0795783
-118.187	-0.168868	0.0663027	0.180711	0.260573	-0.371462	0.129632	-0.163612					-0.00953188	0.211926	0.0801005
-118.089	-0.169515	0.071633	0.173259	0.26899	-0.370771	0.134487	-0.166409					-0.00833226	0.213476	0.0806864
-117.99	-0.170012	0.0766559	0.165564	0.277854	-0.36991	0.139787	-0.169666					-0.0071037	0.215208	0.081341
-117.892	-0.170345	0.081366	0.157713	0.287108	-0.368935	0.145539	-0.173495					-0.00586418	0.217156	0.0820772
-117.794	-0.170498	0.085851	0.149655	0.296662	-0.367694	0.151866	-0.17771					-0.00455251	0.219266	0.0828748
-117.695	-0.170552	0.0901214	0.14151	0.306476	-0.366094	0.158771	-0.182186					-0.0031362	0.221527	0.0837292
-117.597	-0.170435	0.0942631	0.133295	0.316545	-0.364267	0.166292	-0.186917					-0.00160349	0.223979	0.084656
-117.499	-0.17023	0.0981826	0.124946	0.326794	-0.361879	0.174355	-0.191874					4.21952e-05	0.226525	0.0856185
-117.401	-0.169983	0.101862	0.116529	0.337168	-0.358877	0.182889	-0.196905					0.00181199	0.229135	0.086605
-117.302	-0.169665	0.105168	0.108103	0.347588	-0.355311	0.191759	-0.201944					0.00367117	0.23178	0.0876047
-117.204	-0.16923	0.108001	0.099606	0.358048	-0.351127	0.200783	-0.206991					0.00558437	0.234415	0.0886007
-117.106	-0.168697	0.110432	0.0908987	0.36848	-0.346272	0.209958	-0.21196					0.00754833	0.237008	0.0895805
-117.007	-0.168107	0.11258	0.0819228	0.378839	-0.340811	0.219453	-0.21677					0.00958666	0.23959	0.0905564
-116.909	-0.167414	0.114413	0.0727153	0.389093	-0.334756	0.229221	-0.22135					0.0117033	0.242145	0.0915223
-116.811	-0.166541	0.115923	0.0631864	0.399181	-0.328184	0.239236	-0.225586					0.0138881	0.244654	0.0924706
-116.712	-0.165518	0.116984	0.0532246	0.409086	-0.32123	0.249364	-0.229484					0.0160608	0.247125	0.0934044
-116.614	-0.164337	0.117601	0.0428965	0.418764	-0.314022	0.259264	-0.232978					0.0181697	0.249524	0.0943112
-116.516	-0.162898	0.117803	0.0322343	0.428152	-0.306572	0.268901	-0.235981					0.0202344	0.251817	0.0951778
-116.417	-0.161292	0.117592	0.0212283	0.437255	-0.29886	0.278044	-0.238592					0.0221965	0.253993	0.0960005
-116.319	-0.159564	0.117019	0.00986214	0.446096	-0.290925	0.286515	-0.240631					0.0240532	0.256023	0.0967677
-116.221	-0.15779	0.116125	-0.0017384	0.454585	-0.282758	0.294339	-0.241918					0.0258351	0.257868	0.0974651
-116.123	-0.155942	0.11497	-0.0135113	0.462676	-0.274348	0.301423	-0.242317					0.0275643	0.25948	0.0980742
-116.024	-0.15403	0.113579	-0.0254277	0.470328	-0.265737	0.307701	-0.241741					0.029239	0.260831	0.098585
-115.926	-0.152093	0.111808	-0.0375354	0.477529	-0.25692	0.313248	-0.240166					0.0308388	0.261925	0.0989982
-115.828	-0.150091	0.109633	-0.0498433	0.484271	-0.247864	0.318038	-0.237515					0.0323756	0.262736	0.0993048
-115.729	-0.14806	0.107091	-0.0622775	0.490511	-0.238587	0.322034	-0.233913					0.0338285	0.263277	0.0995094
-115.631	-0.145979	0.10411	-0.0748204	0.496264	-0.229058	0.325188	-0.22944					0.0351806	0.263552	0.0996133
-115.533	-0.143801	0.100691	-0.0874064	0.501518	-0.21921	0.327559	-0.224122					0.0364611	0.263561	0.0996167
-115.434	-0.141533	0.0968986	-0.0999516	0.506303	-0.209394	0.32921	-0.218013					0.0376457	0.263381	0.0995488
-115.336	-0.139182	0.0927318	-0.112456	0.510586	-0.199712	0.330076	-0.211267					0.0386826	0.263034	0.0994176
-115.238	-0.136803	0.0883471	-0.124888	0.514375	-0.190006	0.330258	-0.204027					0.0396081	0.262547	0.0992335
-115.14	-0.134422	0.0838311	-0.137155	0.517628	-0.180343	0.329868	-0.196385					0.0404316	0.261945	0.0990061
-115.041	-0.131965	0.0791948	-0.149109	0.520287	-0.170928	0.328874	-0.188452					0.0411291	0.261224	0.0987334
-114.943	-0.129401	0.0743748	-0.160654	0.522322	-0.161671	0.327133	-0.180322					0.0416832	0.260333	0.0983967
-114.845	-0.126711	0.0694405	-0.171742	0.523757	-0.152496	0.324713	-0.171988					0.0421392	0.259268	0.097994
-114.746	-0.123962	0.064397	-0.182271	0.524627	-0.143329	0.321666	-0.163498					0.0425186	0.258031	0.0975264
-114.648	-0.121064	0.0593284	-0.192195	0.524975	-0.134113	0.318128	-0.154854					0.0428866	0.25663	0.0969969
-114.55	-0.11812	0.0541645	-0.201598	0.524808	-0.124757	0.314256	-0.146076					0.0432396	0.255097	0.0964177
-114.451	-0.115251	0.0488978	-0.210454	0.524188	-0.115349	0.309926	-0.137169					0.0435413	0.253445	0.0957933
-114.353	-0.112399	0.043529	-0.218733	0.523122	-0.105887	0.305306	-0.128019					0.0438454	0.251676	0.0951245
-114.255	-0.109567	0.0380406	-0.22638	0.521597	-0.0962584	0.300487	-0.118801					0.0441597	0.249796	0.0944139
-114.156	-0.106667	0.0324951	-0.233515	0.5197	-0.0864191	0.295468	-0.109554					0.0445012	0.247836	0.0936733
-114.058	-0.103754	0.026897	-0.24017	0.517374	-0.0763613	0.290341	-0.100418					0.0448441	0.245817	0.09291
-113.96	-0.100768	0.0212495	-0.246304	0.514645	-0.0661369	0.285052	-0.091408					0.04519	0.243727	0.0921201
-113.862	-0.0977097	0.0157055	-0.251934	0.511478	-0.0557673	0.279652	-0.0825023					0.0455605	0.241562	0.091302
-113.763	-0.094633	0.0102237	-0.257135	0.5079	-0.0452938	0.274094	-0.0736578					0.0459283	0.239338	0.0904613
-113.665	-0.0915485	0.00472261	-0.261964	0.503982	-0.0348582	0.268291	-0.0647617					0.0462663	0.237075	0.089606
-113.567	-0.0884373	-0.000675894	-0.266513	0.499676	-0.0245151	0.26225	-0.0558139					0.0465672	0.234776	0.088737
-113.468	-0.0854618	-0.00596252	-0.27079	0.49495	-0.0143109	0.25578	-0.0467973					0.0467724	0.232424	0.087848
-113.37	-0.0827036	-0.0110889	-0.274781	0.489839	-0.00416119	0.248929	-0.0376335					0.0469143	0.230032	0.0869438
-113.272	-0.0801513	-0.0160289	-0.27844	0.48438	0.00597974	0.241766	-0.0281955					0.0470442	0.227603	0.0860259
-113.173	-0.0778036	-0.020813	-0.281713	0.478546	0.016032	0.234216	-0.018357					0.0471583	0.225116	0.0850858
-113.075	-0.0756446	-0.0254422	-0.284647	0.472376	0.0260104	0.226284	-0.0079762					0.0472801	0.222592	0.0841317
-112.977	-0.0737576	-0.0299319	-0.287328	0.466001	0.0360629	0.218059	0.00303968					0.0474493	0.220114	0.0831952
-112.879	-0.0721759	-0.0342869	-0.2898	0.459401	0.0461545	0.209699	0.0147741					0.0476809	0.217724	0.082292
-112.78	-0.0709728	-0.0385778	-0.291993	0.452554	0.0562257	0.20101	0.0270212					0.0478952	0.215416	0.0814197
-112.682	-0.0701319	-0.0428142	-0.293949	0.445465	0.0662781	0.191877	0.0397817					0.0480724	0.213211	0.0805861
-112.584	-0.0696879	-0.0469659	-0.295647	0.438105	0.076274	0.182299	0.0530287					0.0482008	0.211121	0.0797963
-112.485	-0.0695475	-0.0508599	-0.297024	0.430508	0.086113	0.172246	0.0666828					0.0483026	0.209142	0.0790483
-112.387	-0.0696522	-0.0544836	-0.298079	0.422632	0.0959172	0.161813	0.080624					0.0483958	0.207288	0.0783474
-112.289	-0.0700395	-0.057799	-0.298737	0.414512	0.105644	0.150845	0.0946417					0.0484382	0.205551	0.0776911
-112.19	-0.0707196	-0.0608678	-0.299032	0.406178	0.115128	0.139327	0.108755					0.0483953	0.203963	0.0770907
-112.092	-0.0717518	-0.063763	-0.29887	0.397611	0.124114	0.127322	0.122938					0.0482285	0.202512	0.0765425
-111.994	-0.073075	-0.0664255	-0.298164	0.388878	0.132572	0.114773	0.13725					0.0479727	0.201195	0.0760446
-111.895	-0.07472	-0.0688662	-0.296947	0.380031	0.140449	0.101754	0.151519					0.047603	0.200037	0.0756067
-111.797	-0.0766721	-0.071162	-0.295244	0.371175	0.147698	0.0882059	0.165605					0.0470864	0.199063	0.0752387
-111.699	-0.0788749	-0.0731875	-0.292977	0.362333	0.154283	0.0743006	0.179422					0.0464714	0.198242	0.0749282
-111.601	-0.0812846	-0.0748887	-0.290121	0.353532	0.160278	0.0602691	0.192808					0.0457991	0.197551	0.0746672
-111.502	-0.0839394	-0.0763336	-0.286592	0.344901	0.165641	0.0461654	0.205732					0.0450821	0.196989	0.0744547
-111.404	-0.0866658	-0.0774962	-0.282431	0.336516	0.170331	0.0322673	0.218198					0.0443886	0.196541	0.0742855
-111.306	-0.0892851	-0.0784013	-0.277711	0.328381	0.174481	0.0185826	0.230027					0.0437249	0.196176	0.0741475
-111.207	-0.0917685	-0.0790849	-0.272565	0.320585	0.178122	0.00505142	0.241176					0.0430737	0.195913	0.0740482
-111.109	-0.0940623	-0.0795981	-0.267155	0.313231	0.181121	-0.00821638	0.251549					0.0424098	0.19575	0.0739867
-111.011	-0.0962239	-0.0799795	-0.261452	0.306337	0.183456	-0.0212259	0.261074					0.0417122	0.195646	0.0739473
-110.912	-0.09828	-0.0802134	-0.255423	0.29983	0.185078	-0.0340763	0.269719					0.0409479	0.195543	0.0739083
-110.814	-0.100251	-0.0802745	-0.249066	0.293782	0.185982	-0.0467589	0.277403					0.0401166	0.195411	0.0738584
-110.716	-0.102087	-0.0801528	-0.242503	0.288291	0.186185	-0.0590508	0.284234					0.0392737	0.195269	0.0738047
-110.618	-0.103782	-0.0798265	-0.2358	0.283354	0.185613	-0.0707915	0.290134					0.0384145	0.195063	0.0737268
-110.519	-0.105418	-0.0793632	-0.228998	0.278924	0.184278	-0.0820053	0.295101					0.0375026	0.194779	0.0736197
-110.421	-0.107036	-0.0788145	-0.222119	0.274999	0.182234	-0.092546	0.299229					0.0365638	0.194416	0.0734824
-110.323	-0.108625	-0.0781705	-0.215291	0.271616	0.179372	-0.102198	0.302608					0.035616	0.193961	0.0733104
-110.224	-0.110052	-0.0774589	-0.208746	0.268759	0.17574	-0.110876	0.30543					0.0346849	0.193451	0.0731174
-110.126	-0.111259	-0.0765964	-0.20254	0.26643	0.171488	-0.118526	0.307718					0.0338165	0.192871	0.0728984
-110.028	-0.112179	-0.0755912	-0.196729	0.264651	0.16698	-0.125253	0.309471					0.0330501	0.192256	0.072666
-109.929	-0.112858	-0.0745466	-0.191361	0.263453	0.162233	-0.130883	0.310661					0.0323854	0.191587	0.0724131
-109.831	-0.113347	-0.0734384	-0.186487	0.262776	0.157355	-0.135345	0.311434					0.0318497	0.190877	0.0721448
-109.733	-0.113671	-0.0721675	-0.182107	0.262499	0.15245	-0.138659	0.311982					0.031475	0.190136	0.0718648
-109.634	-0.113867	-0.0707698	-0.178264	0.262588	0.147644	-0.140865	0.31227					0.031248	0.189369	0.0715747
-109.536	-0.11395	-0.0692541	-0.175012	0.263054	0.143017	-0.142054	0.312344					0.0311634	0.188604	0.0712857
-109.438	-0.113864	-0.0676073	-0.172467	0.263756	0.138627	-0.142268	0.312328					0.0312152	0.187858	0.0710035
-109.34	-0.113648	-0.0659005	-0.170625	0.264643	0.134553	-0.141719	0.312172					0.0313536	0.187146	0.0707347
-109.241	-0.113406	-0.0641649	-0.169467	0.265652	0.130679	-0.140515	0.312					0.0315399	0.186498	0.0704895
-109.143	-0.113188	-0.062397	-0.168921	0.266657	0.126868	-0.138621	0.311761					0.0317369	0.185857	0.0702474
-109.045	-0.112992	-0.0605928	-0.168821	0.267625	0.123267	-0.136034	0.311467					0.0319885	0.185207	0.0700016
-108.946	-0.112818	-0.058771	-0.169195	0.268532	0.119968	-0.132682	0.311082					0.0323022	0.184539	0.0697493
-108.848	-0.112566	-0.0569399	-0.17005	0.269405	0.116911	-0.128537	0.310561					0.0326835	0.183836	0.0694835
-108.75	-0.112173	-0.0551205	-0.17138	0.270208	0.114135	-0.123626	0.309861					0.0331292	0.183087	0.0692003
-108.651	-0.111607	-0.0532914	-0.173122	0.27087	0.111615	-0.118013	0.309009					0.0336372	0.182283	0.0688964
-108.553	-0.110847	-0.0514577	-0.175121	0.27143	0.109323	-0.111794	0.308162					0.0342421	0.181455	0.0685836
-108.455	-0.109775	-0.0495884	-0.177422	0.271965	0.107251	-0.104987	0.307429					0.0349817	0.180643	0.0682768
-108.357	-0.108367	-0.0478306	-0.18012	0.272432	0.105469	-0.0978705	0.30672					0.0357762	0.179886	0.0679907
-108.258	-0.106679	-0.0462268	-0.183103	0.272814	0.104002	-0.0907262	0.306047					0.0365897	0.17921	0.0677349
-108.16	-0.104843	-0.0447919	-0.186257	0.273082	0.102724	-0.0835292	0.305313					0.0373853	0.178576	0.0674953
-108.062	-0.102911	-0.0435143	-0.189485	0.273214	0.101612	-0.0763319	0.304417					0.0381431	0.177953	0.06726
-107.963	-0.100976	-0.0423424	-0.192758	0.273159	0.100436	-0.0690957	0.303359					0.038826	0.17732	0.0670206
-107.865	-0.0990001	-0.041233	-0.196135	0.272909	0.0991478	-0.0619912	0.302119					0.0394024	0.176688	0.0667819
-107.767	-0.0968799	-0.0402398	-0.199619	0.272485	0.0977687	-0.0550638	0.300645					0.0398709	0.176049	0.0665401
-107.668	-0.0945825	-0.0394244	-0.203203	0.271979	0.0961572	-0.0483311	0.298819					0.0402019	0.175388	0.0662902
-107.57	-0.0921641	-0.0388676	-0.206871	0.271386	0.094191	-0.041803	0.296799					0.0403815	0.174743	0.0660466
-107.472	-0.0896478	-0.0386317	-0.210566	0.270655	0.0917574	-0.0354947	0.294724					0.0403994	0.174126	0.0658133
-107.374	-0.0870152	-0.038759	-0.214197	0.269848	0.0888431	-0.0294414	0.292493					0.0402531	0.173511	0.0655809
-107.275	-0.0842975	-0.0391726	-0.217825	0.268958	0.0854438	-0.0235403	0.290266					0.039976	0.172937	0.0653639
-107.177	-0.0814341	-0.039801	-0.221427	0.268033	0.0815819	-0.0176531	0.28802					0.0396171	0.172388	0.0651565
-107.079	-0.078362	-0.0406287	-0.224989	0.267123	0.0773905	-0.0118023	0.285768					0.0392141	0.171878	0.0649637
-106.98	-0.0751565	-0.0416769	-0.228646	0.266184	0.0728905	-0.00607721	0.283529					0.0387209	0.171448	0.0648014
-106.882	-0.0717623	-0.0428353	-0.232426	0.265199	0.0680347	-0.000528469	0.281312					0.0381419	0.171097	0.0646685
-106.784	-0.0682579	-0.0440838	-0.236308	0.264161	0.0628888	0.00488043	0.279222					0.0375003	0.170849	0.0645747
-106.685	-0.0647042	-0.0453806	-0.240294	0.263058	0.0574735	0.00998781	0.277405					0.0367922	0.170741	0.0645341
-106.587	-0.0611391	-0.046749	-0.244436	0.261844	0.0518036	0.0147017	0.275794					0.0359743	0.170771	0.0645452
-106.489	-0.0575821	-0.048221	-0.248894	0.26039	0.0460196	0.0190166	0.274343					0.0350104	0.170945	0.0646112
-106.39	-0.0541022	-0.0498638	-0.253562	0.258628	0.0401843	0.0229383	0.273001					0.0338892	0.171225	0.0647171
-106.292	-0.0507668	-0.0515689	-0.258262	0.256595	0.034153	0.0266757	0.27182					0.0326637	0.171578	0.0648503
-106.194	-0.0474695	-0.0532994	-0.262988	0.254268	0.0279609	0.0302754	0.270744					0.031356	0.171975	0.0650004
-106.096	-0.0441451	-0.055036	-0.267614	0.251655	0.0217609	0.0337199	0.269801					0.0300203	0.172387	0.0651561
-105.997	-0.0407224	-0.0567911	-0.272244	0.248758	0.0155604	0.0370986	0.269061					0.0286743	0.172849	0.0653309
-105.899	-0.0371025	-0.058538	-0.276864	0.245625	0.00943609	0.0404614	0.26853					0.027364	0.173362	0.0655248
-105.801	-0.0333196	-0.0602367	-0.281413	0.242197	0.00337677	0.0437545	0.268293					0.0260931	0.173918	0.0657348
-105.702	-0.029457	-0.0618742	-0.285844	0.238464	-0.0026743	0.0469097	0.268423					0.0248495	0.174521	0.0659629
-105.604	-0.0255177	-0.0634655	-0.290095	0.23436	-0.00857771	0.0498945	0.268985					0.0236549	0.175156	0.0662028
-105.506	-0.0214194	-0.0649368	-0.294181	0.229909	-0.0142738	0.0525963	0.269951					0.0225206	0.175812	0.0664508
-105.407	-0.0171208	-0.0662021	-0.298128	0.225149	-0.0196599	0.0549648	0.271143					0.0214494	0.176454	0.0666935
-105.309	-0.0127085	-0.0672708	-0.301911	0.220089	-0.0248043	0.0569081	0.272588					0.0204129	0.177087	0.0669324
-105.211	-0.00820612	-0.0682757	-0.305345	0.214741	-0.0297683	0.0584075	0.274161					0.0193878	0.177647	0.0671441
-105.113	-0.00365997	-0.0692814	-0.308403	0.209099	-0.0345834	0.0593664	0.275881					0.0183455	0.178135	0.0673285
-105.014	0.00090542	-0.0702401	-0.311058	0.203247	-0.0393937	0.0599264	0.277851					0.0173198	0.178584	0.0674984
-104.916	0.00555313	-0.071082	-0.31331	0.1972	-0.0443549	0.0601163	0.280142					0.0163235	0.179017	0.0676621
-104.818	0.0102778	-0.0719311	-0.315134	0.19101	-0.0494277	0.0598422	0.282768					0.0153435	0.179447	0.0678245
-104.719	0.015155	-0.0728785	-0.316531	0.184761	-0.0546464	0.0590506	0.285687					0.0143712	0.179887	0.0679908
-104.621	0.0202096	-0.0740007	-0.317526	0.178485	-0.0601654	0.0578331	0.288863					0.0133855	0.180363	0.0681709
-104.523	0.0254226	-0.0752302	-0.318045	0.172268	-0.0659448	0.0562485	0.292349					0.0124384	0.180884	0.0683676
-104.424	0.0307284	-0.0765048	-0.318002	0.166298	-0.0720312	0.0543694	0.296015					0.0115533	0.181428	0.0685733
-104.326	0.0360665	-0.0777077	-0.317487	0.160636	-0.0784654	0.0521708	0.299827					0.01072	0.182017	0.0687961
-104.228	0.0415284	-0.0788086	-0.316646	0.15532	-0.0851522	0.0496061	0.303744					0.00994168	0.18268	0.0690466
-104.129	0.0470076	-0.0797967	-0.315504	0.150434	-0.0920776	0.0467746	0.307801					0.00923409	0.183444	0.0693352
-104.031	0.05246	-0.0806931	-0.314182	0.146008	-0.0993707	0.0435375	0.312128					0.00855537	0.184381	0.0696894
-103.933	0.0578358	-0.0814902	-0.312559	0.142056	-0.107117	0.0398165	0.31671					0.00789332	0.185467	0.0701001
-103.835	0.0630765	-0.0822915	-0.31067	0.138646	-0.115256	0.0355472	0.321506					0.00722253	0.186715	0.0705716
-103.736	0.0681976	-0.0831363	-0.30852	0.135881	-0.123826	0.0307918	0.326505					0.00655609	0.188147	0.0711131
-103.638	0.0731762	-0.0839978	-0.306113	0.133762	-0.132783	0.0257083	0.331597					0.00590725	0.189741	0.0717154
-103.54	0.0779052	-0.0849184	-0.303493	0.132351	-0.142227	0.0204428	0.336664					0.00524631	0.191498	0.0723795
-103.441	0.0823235	-0.0859221	-0.300543	0.131649	-0.15211	0.015149	0.341544					0.00458439	0.19335	0.0730794
-103.343	0.0864005	-0.0870043	-0.297239	0.131645	-0.162446	0.00987883	0.346334					0.0039383	0.195317	0.0738228
-103.245	0.090202	-0.0880389	-0.293667	0.132388	-0.173135	0.00486001	0.351015					0.00337476	0.197406	0.0746126
-103.146	0.0937896	-0.0889112	-0.289971	0.133939	-0.184109	6.27205e-05	0.355564					0.00290898	0.199638	0.0754561
-103.048	0.0971186	-0.0896542	-0.286305	0.136288	-0.195314	-0.00454078	0.359955					0.00250674	0.202028	0.0763593
-102.95	0.100162	-0.0903282	-0.28273	0.139365	-0.20653	-0.00908526	0.364036					0.00212717	0.204513	0.0772986
-102.852	0.102894	-0.0909783	-0.279084	0.143171	-0.217631	-0.0135956	0.367715					0.00178448	0.207016	0.0782448
-102.753	0.105308	-0.0915621	-0.27534	0.147678	-0.228692	-0.01793	0.37105					0.00150167	0.20955	0.0792023
-102.655	0.107276	-0.0920376	-0.271495	0.152763	-0.23957	-0.0219873	0.374031					0.00128298	0.212061	0.0801517
-102.557	0.108792	-0.0923324	-0.267524	0.158369	-0.250106	-0.0257794	0.376677					0.00115666	0.214511	0.0810774
-102.458	0.109852	-0.0925322	-0.263435	0.164436	-0.260304	-0.0292214	0.378949					0.00110639	0.216885	0.0819747
-102.36	0.110468	-0.0926598	-0.259257	0.170825	-0.270177	-0.0322347	0.380938					0.00112877	0.219195	0.0828478
-102.262	0.110717	-0.0928413	-0.254901	0.177479	-0.279716	-0.0347429	0.382667					0.00123739	0.221431	0.0836932
-102.163	0.110546	-0.0931193	-0.250307	0.184303	-0.288892	-0.0367981	0.384221					0.00142197	0.223587	0.0845078
-102.065	0.109993	-0.0935311	-0.245462	0.191243	-0.297661	-0.0384587	0.385623					0.00167784	0.225654	0.0852892
-101.967	0.109071	-0.0940134	-0.240371	0.198346	-0.305991	-0.0395014	0.386756					0.00204224	0.227595	0.0860228
-101.868	0.107757	-0.0946594	-0.235108	0.205608	-0.31372	-0.0399316	0.387654					0.00251423	0.229399	0.0867048
-101.77	0.106067	-0.0954208	-0.229662	0.212907	-0.320899	-0.0396789	0.388361					0.00309619	0.231065	0.0873343
-101.672	0.103949	-0.0963582	-0.224077	0.220166	-0.327432	-0.038563	0.388844					0.00378983	0.232554	0.0878973
-101.574	0.101405	-0.0975202	-0.218385	0.227434	-0.333303	-0.0367058	0.389214					0.00459119	0.233907	0.0884087
-101.475	0.0985177	-0.0987976	-0.212625	0.234706	-0.338454	-0.0342072	0.389513					0.00552198	0.235126	0.0888694
-101.377	0.0953312	-0.100146	-0.20697	0.241996	-0.342942	-0.0311703	0.389778					0.00655379	0.236258	0.089297
-101.279	0.0918532	-0.101621	-0.201472	0.249284	-0.346722	-0.0276385	0.389995					0.00766833	0.237295	0.089689
-101.18	0.0879792	-0.103358	-0.196052	0.256498	-0.349824	-0.023689	0.39014					0.00881347	0.238224	0.0900402
-101.082	0.0836363	-0.105358	-0.190729	0.263563	-0.352225	-0.0193074	0.390324					0.00998632	0.239054	0.090354
-100.984	0.0788564	-0.107605	-0.18531	0.270475	-0.353968	-0.0144189	0.390613					0.0112347	0.239789	0.0906315
-100.885	0.0736696	-0.110087	-0.179753	0.277222	-0.355161	-0.00898479	0.391012					0.0125598	0.240451	0.0908819
-100.787	0.0680895	-0.112769	-0.174228	0.28384	-0.35579	-0.0029622	0.391502					0.0139546	0.241063	0.0911132
-100.689	0.0620782	-0.115639	-0.168722	0.290321	-0.355866	0.00361355	0.392058					0.0154064	0.241626	0.0913259
-100.591	0.0556689	-0.118628	-0.163269	0.296739	-0.355579	0.0107577	0.392594					0.0168977	0.242182	0.0915363
-100.492	0.0488681	-0.121776	-0.157917	0.303148	-0.355017	0.0184886	0.393038					0.0184046	0.242764	0.0917562
-100.394	0.0416973	-0.125135	-0.152745	0.309559	-0.354235	0.0266618	0.393431					0.0198905	0.243418	0.0920035
-100.296	0.034216	-0.128646	-0.147749	0.316046	-0.353157	0.0351105	0.393689					0.0213586	0.244127	0.0922713
-100.197	0.0263944	-0.132132	-0.143023	0.322662	-0.35179	0.0437487	0.393757					0.0228025	0.24489	0.0925597
-100.099	0.0182056	-0.135583	-0.138607	0.329497	-0.350118	0.0526484	0.393503					0.0242208	0.245702	0.0928667
-100.001	0.00963638	-0.139028	-0.134513	0.336462	-0.348166	0.0617825	0.392809					0.0255689	0.246542	0.0931841
-99.9024	0.000692728	-0.142514	-0.13067	0.343441	-0.345817	0.0710066	0.391574					0.0268161	0.247347	0.0934885
-99.8041	-0.00859583	-0.145916	-0.127037	0.350386	-0.343224	0.0803101	0.389761					0.0279549	0.248127	0.0937833
-99.7058	-0.0182758	-0.149198	-0.123612	0.357312	-0.34033	0.0896313	0.387198					0.0289609	0.248842	0.0940534
-99.6075	-0.0282627	-0.152249	-0.120328	0.36423	-0.337127	0.0987453	0.383919					0.0298469	0.249481	0.0942948
-99.5092	-0.038462	-0.155049	-0.117151	0.371035	-0.333707	0.107691	0.379861					0.0306025	0.25003	0.0945026
-99.4109	-0.0488435	-0.157679	-0.114008	0.377667	-0.330111	0.116492	0.375086					0.0312291	0.250509	0.0946837
-99.3126	-0.059398	-0.160201	-0.110795	0.384076	-0.326319	0.125246	0.36966					0.0317528	0.250925	0.0948407
-99.2143	-0.0700843	-0.162636	-0.107492	0.39022	-0.322455	0.134043	0.363627					0.0321746	0.251314	0.0949878
-99.116	-0.0807896	-0.164926	-0.104158	0.396079	-0.318463	0.142815	0.356955					0.0325017	0.25165	0.0951146
-99.0177	-0.0915004	-0.167065	-0.10074	0.401647	-0.314325	0.151593	0.34951					0.0327315	0.251904	0.0952109
-98.9194	-0.102163	-0.16902	-0.0973556	0.406908	-0.309984	0.160278	0.341223					0.0328409	0.252054	0.0952676
-98.8211	-0.112781	-0.170774	-0.0940751	0.41182	-0.305462	0.168857	0.332184					0.0328242	0.25212	0.0952925
-98.7227	-0.123403	-0.172317	-0.0908281	0.4163	-0.300752	0.177258	0.322484					0.0326772	0.252097	0.0952837
-98.6244	-0.13398	-0.173662	-0.0876598	0.420326	-0.295774	0.185354	0.312118					0.0323889	0.251958	0.0952313
-98.5261	-0.14438	-0.174825	-0.0845907	0.423833	-0.290323	0.193011	0.30122					0.0319922	0.251654	0.0951163
-98.4278	-0.154553	-0.175823	-0.0816473	0.426779	-0.284388	0.200199	0.289729					0.0314707	0.251161	0.0949299
-98.3295	-0.164498	-0.176538	-0.0787686	0.42915	-0.277921	0.207043	0.277654					0.0308743	0.250464	0.0946665
-98.2312	-0.174239	-0.177112	-0.0759165	0.430848	-0.270982	0.213648	0.265123					0.0301959	0.249601	0.0943404
-98.1329	-0.183682	-0.177665	-0.0730382	0.431825	-0.263526	0.22014	0.2523					0.029479	0.248594	0.0939595
-98.0346	-0.192732	-0.178176	-0.0700686	0.432014	-0.255622	0.226472	0.239338					0.0287466	0.247435	0.0935217
-97.9363	-0.201331	-0.178561	-0.067027	0.431514	-0.24734	0.232627	0.226367					0.0280357	0.246155	0.093038
-97.838	-0.209476	-0.17881	-0.0640639	0.430393	-0.238843	0.238579	0.213537					0.027331	0.244812	0.0925302
-97.7397	-0.217186	-0.178981	-0.0612688	0.428702	-0.230083	0.244282	0.200895					0.026623	0.243414	0.0920018
-97.6414	-0.224339	-0.179104	-0.0586439	0.426451	-0.221223	0.249872	0.18867					0.0259547	0.242004	0.091469
-97.5431	-0.230992	-0.179249	-0.0562671	0.423629	-0.212352	0.255416	0.176734					0.025274	0.240597	0.0909371
-97.4448	-0.237165	-0.179334	-0.054208	0.420312	-0.203411	0.260767	0.165137					0.0245853	0.239172	0.0903986
-97.3465	-0.242811	-0.179352	-0.0525245	0.416606	-0.194357	0.265902	0.153893					0.0239079	0.237728	0.0898529
-97.2482	-0.247906	-0.179268	-0.0512859	0.412547	-0.185178	0.270697	0.143007					0.0232304	0.236239	0.0892898
-97.1499	-0.25254	-0.179023	-0.0505262	0.408249	-0.175843	0.275119	0.132456					0.022556	0.234716	0.0887142
-97.0516	-0.256677	-0.178587	-0.0502425	0.403729	-0.166483	0.279178	0.122259					0.0218825	0.233161	0.0881267
-96.9533	-0.260198	-0.178016	-0.0504174	0.398977	-0.157179	0.282777	0.112468					0.0212016	0.231544	0.0875154
-96.855	-0.263161	-0.177299	-0.0510629	0.394011	-0.147989	0.2859	0.103165					0.0205091	0.229869	0.0868824
-96.7567	-0.265543	-0.176433	-0.052094	0.388886	-0.138778	0.288503	0.0943879					0.0198469	0.228108	0.0862168
-96.6584	-0.267209	-0.175434	-0.0535025	0.383646	-0.129649	0.290611	0.0860885					0.0192216	0.226247	0.0855132
-96.5601	-0.268166	-0.17429	-0.0552802	0.378303	-0.120652	0.292349	0.0781944					0.0186368	0.224298	0.0847767
-96.4618	-0.268469	-0.173037	-0.0573029	0.372931	-0.111884	0.293755	0.0707069					0.0180999	0.222292	0.0840183
-96.3635	-0.268164	-0.17162	-0.0594237	0.367589	-0.103338	0.294903	0.0637802					0.0176752	0.220242	0.0832437
-96.2652	-0.267227	-0.170086	-0.0616655	0.362304	-0.0950567	0.295744	0.0574215					0.0173477	0.218141	0.0824494
-96.1668	-0.265592	-0.168355	-0.064142	0.357176	-0.0870756	0.296167	0.0515981					0.017111	0.215963	0.0816265
-96.0685	-0.263303	-0.166417	-0.0668091	0.352257	-0.0794317	0.295975	0.0460265					0.0168996	0.213676	0.0807619
-95.9702	-0.260384	-0.164245	-0.069741	0.347599	-0.0720988	0.295147	0.0406294					0.0167009	0.21128	0.0798562
-95.8719	-0.256879	-0.16186	-0.0730104	0.343203	-0.0650189	0.293732	0.0353708					0.0165054	0.20879	0.0789154
-95.7736	-0.252809	-0.159321	-0.0764509	0.339064	-0.0580227	0.291811	0.030193					0.0163519	0.206212	0.077941
-95.6753	-0.248133	-0.156579	-0.0799597	0.335171	-0.0510994	0.289492	0.0250709					0.0162804	0.203544	0.0769323
-95.577	-0.242891	-0.1536	-0.0835411	0.331498	-0.0440981	0.286551	0.01999					0.0162727	0.200735	0.0758707
-95.4787	-0.237005	-0.150329	-0.0871015	0.328047	-0.0369288	0.282999	0.0150618					0.0163919	0.197762	0.0747472
-95.3804	-0.230518	-0.146829	-0.0905675	0.324794	-0.0295651	0.279044	0.0102771					0.0166622	0.194677	0.0735808
-95.2821	-0.223481	-0.143107	-0.0939086	0.321605	-0.0220546	0.274761	0.00567713					0.0170704	0.191477	0.0723716
-95.1838	-0.215934	-0.139206	-0.0970652	0.318462	-0.01446	0.270279	0.00124559					0.0176173	0.1882	0.0711329
-95.0855	-0.207806	-0.135189	-0.0999508	0.315255	-0.00681932	0.265509	-0.00298928					0.0182872	0.184795	0.069846
-94.9872	-0.199192	-0.131091	-0.102546	0.312065	0.00096903	0.260461	-0.00690083					0.0191094	0.181303	0.0685261
-94.8889	-0.190246	-0.126886	-0.10488	0.308971	0.00884008	0.255233	-0.01045					0.0200833	0.17779	0.0671982
-94.7906	-0.180921	-0.122631	-0.106886	0.306003	0.0167271	0.249946	-0.0137495					0.0212125	0.174284	0.0658733
-94.6923	-0.171266	-0.118355	-0.108666	0.303147	0.0244167	0.244739	-0.0168056					0.0224585	0.170835	0.0645694
-94.594	-0.161429	-0.114134	-0.110308	0.300391	0.0319311	0.239715	-0.0196928					0.0237821	0.167503	0.06331
-94.4957	-0.151381	-0.109934	-0.111809	0.297739	0.0392544	0.23477	-0.0223062					0.0251905	0.164258	0.0620837
-94.3974	-0.14114	-0.105797	-0.113299	0.295094	0.046352	0.22993	-0.0247701					0.0266242	0.161111	0.0608944
-94.2991	-0.130708	-0.101729	-0.114893	0.292412	0.0531808	0.22507	-0.0271559					0.0280251	0.158052	0.0597381
-94.2008	-0.120106	-0.0976542	-0.116558	0.289729	0.059773	0.220134	-0.0294795					0.0294055	0.155075	0.058613
-94.1025	-0.109403	-0.0935105	-0.118173	0.287012	0.0660812	0.21524	-0.0316719					0.0307964	0.152181	0.0575189
-94.0042	-0.0986433	-0.0892626	-0.119814	0.284196	0.0720238	0.210491	-0.0335173					0.0322106	0.149368	0.0564559
-93.9059	-0.0879134	-0.0849794	-0.121428	0.281251	0.0775448	0.205927	-0.0349575					0.0336349	0.146638	0.055424
-93.8076	-0.077196	-0.0807018	-0.122819	0.278151	0.0825596	0.201589	-0.0360296					0.0350789	0.143956	0.0544102
-93.7092	-0.0663804	-0.0763562	-0.124081	0.274907	0.0869079	0.19759	-0.0367055					0.0365545	0.141318	0.0534131
-93.6109	-0.0554834	-0.0720264	-0.125332	0.271524	0.0905151	0.193864	-0.0370468					0.038002	0.138739	0.0524384
-93.5126	-0.0445554	-0.0677543	-0.126584	0.268036	0.0932983	0.190466	-0.0371112					0.0393994	0.136243	0.0514952
-93.4143	-0.0336853	-0.0635458	-0.127845	0.264505	0.095218	0.187382	-0.0368419					0.0407411	0.133843	0.0505878
-93.316	-0.0228355	-0.0594401	-0.12909	0.260987	0.0961898	0.184428	-0.036304					0.0419909	0.131516	0.0497083
-93.2177	-0.0120599	-0.0553699	-0.130325	0.257586	0.0961841	0.181424	-0.0356009					0.0431198	0.129264	0.0488573
-93.1194	-0.00139958	-0.0512612	-0.131544	0.254299	0.0952237	0.178148	-0.0347816					0.0440978	0.127056	0.0480228
-93.0211	0.00911917	-0.0470463	-0.132755	0.251197	0.0933649	0.174672	-0.0339188					0.0449475	0.124932	0.0472199
-92.9228	0.0195189	-0.0427501	-0.133996	0.248194	0.0905965	0.171044	-0.0331041					0.0456433	0.122905	0.0464539
-92.8245	0.029827	-0.0383967	-0.135326	0.245235	0.0871599	0.167316	-0.0323076					0.0462153	0.121008	0.0457369
-92.7262	0.0399192	-0.0338766	-0.136782	0.242315	0.0831497	0.163592	-0.031453					0.0466949	0.119265	0.0450781
-92.6279	0.0497814	-0.0291067	-0.13829	0.239439	0.0786571	0.159674	-0.0306918					0.0470661	0.117655	0.0444694
-92.5296	0.0594857	-0.0239815	-0.139721	0.236661	0.0738142	0.155478	-0.0299384					0.0473997	0.11615	0.0439005
-92.4313	0.068943	-0.0186152	-0.141061	0.234027	0.0686531	0.151154	-0.029343					0.0476797	0.114814	0.0433954
-92.333	0.0780783	-0.0128927	-0.14226	0.231606	0.0631097	0.146629	-0.0288084					0.0479232	0.113627	0.0429471
-92.2347	0.0868557	-0.00683694	-0.143226	0.229425	0.0572647	0.142061	-0.0284201					0.0481605	0.112613	0.0425639
-92.1364	0.0952659	-0.000571956	-0.143905	0.227427	0.0511733	0.137452	-0.0283547					0.0483552	0.111775	0.042247
-92.0381	0.103241	0.00583263	-0.144305	0.225606	0.0449303	0.132718	-0.0286423					0.0484829	0.111107	0.0419946
-91.9398	0.110776	0.0122811	-0.144428	0.224027	0.0386554	0.127967	-0.0293293					0.048564	0.110641	0.0418185
-91.8415	0.117944	0.0187626	-0.144242	0.222752	0.0324383	0.123248	-0.030514					0.0486269	0.110394	0.0417252
-91.7432	0.12466	0.0252804	-0.143883	0.2218	0.0262463	0.118472	-0.0321583					0.048631	0.110376	0.0417183
-91.6449	0.130757	0.0317513	-0.143335	0.22114	0.020204	0.113521	-0.0343498					0.048527	0.110547	0.0417828
-91.5466	0.136184	0.0382453	-0.1425	0.220776	0.0144122	0.108428	-0.0369875					0.0483655	0.11085	0.0418975
-91.4483	0.140913	0.0447386	-0.141413	0.220711	0.00885606	0.103303	-0.0401418					0.0481381	0.111297	0.0420663
-91.35	0.144936	0.0511516	-0.140174	0.22084	0.00358741	0.098204	-0.043896					0.0478069	0.111885	0.0422884
-91.2517	0.148208	0.0575495	-0.138851	0.221062	-0.00138101	0.093333	-0.0481782					0.0473917	0.112591	0.0425556
-91.1533	0.150741	0.0638869	-0.137409	0.221307	-0.00595327	0.0888398	-0.0529435					0.0469241	0.113377	0.0428525
-91.055	0.15255	0.0700747	-0.135901	0.221552	-0.010184	0.0849865	-0.0579723					0.0464437	0.114221	0.0431713
-90.9567	0.153605	0.0760441	-0.134419	0.221755	-0.0140357	0.0817637	-0.0632364					0.0459252	0.115101	0.0435043
-90.8584	0.153882	0.0817945	-0.132847	0.221947	-0.0175558	0.0790756	-0.0686436					0.045379	0.115966	0.0438311
-90.7601	0.153462	0.0873639	-0.131075	0.222098	-0.0210194	0.0768216	-0.0741965					0.0447791	0.116805	0.0441481
-90.6618	0.152527	0.0926743	-0.129096	0.222118	-0.0243901	0.0747716	-0.0799111					0.0440991	0.117603	0.0444498
-90.5635	0.151134	0.0976001	-0.126922	0.222013	-0.0277122	0.0729983	-0.0856248					0.0433551	0.118344	0.0447297
-90.4652	0.149224	0.102049	-0.124615	0.221773	-0.0311708	0.0715453	-0.0912909					0.042502	0.119028	0.0449884
-90.3669	0.146822	0.10612	-0.122136	0.22133	-0.0347268	0.0702766	-0.0967643					0.0415602	0.119606	0.0452069
-90.2686	0.143965	0.109744	-0.119462	0.220674	-0.0382475	0.0692182	-0.102017					0.0405535	0.120052	0.0453754
-90.1703	0.140748	0.112922	-0.116703	0.219766	-0.0417528	0.0681722	-0.106793					0.03948	0.120334	0.0454821
-90.072	0.137158	0.115794	-0.113999	0.218578	-0.0452943	0.0672242	-0.110841					0.0383742	0.12044	0.0455222
-89.9737	0.133307	0.118352	-0.111421	0.217088	-0.0489004	0.0663868	-0.114236					0.0372252	0.120397	0.0455058
-89.8754	0.129267	0.120678	-0.108989	0.21521	-0.0525368	0.0654649	-0.116946					0.0360212	0.120182	0.0454246
-89.7771	0.125009	0.122818	-0.106763	0.212856	-0.0562394	0.0644361	-0.118785					0.0347617	0.119752	0.045262
-89.6788	0.120621	0.124852	-0.104671	0.209978	-0.0599113	0.0633471	-0.119709					0.033501	0.11908	0.045008
-89.5805	0.116185	0.126895	-0.102617	0.206572	-0.0635992	0.0620989	-0.1195					0.0322905	0.118132	0.0446497
-89.4822	0.111695	0.128829	-0.100599	0.202651	-0.0673331	0.0607449	-0.118124					0.0311234	0.116898	0.0441834
-89.3839	0.107237	0.130709	-0.0985319	0.198276	-0.0710485	0.0591907	-0.115363					0.030067	0.115349	0.043598
-89.2856	0.102884	0.132581	-0.0963035	0.193506	-0.0748333	0.0573759	-0.11115					0.0291515	0.113502	0.0428999
-89.1873	0.098626	0.134323	-0.0938627	0.188384	-0.0785672	0.055126	-0.105539					0.0283558	0.111349	0.042086
-89.089	0.0944866	0.135921	-0.0912346	0.182989	-0.0822728	0.0523388	-0.09854					0.0276698	0.108936	0.0411741
-88.9907	0.0905278	0.137473	-0.0884119	0.177431	-0.0858139	0.0489167	-0.0904516					0.0270959	0.106363	0.0402014
-88.8924	0.0868043	0.139032	-0.0852858	0.171745	-0.0892287	0.0448763	-0.0813663					0.0266539	0.103688	0.0391903
-88.7941	0.0833132	0.140629	-0.0819209	0.165914	-0.0924701	0.0402843	-0.0713742					0.0263392	0.100972	0.0381638
-88.6957	0.0799315	0.142246	-0.0783665	0.159965	-0.0953691	0.0351219	-0.0606233					0.0261294	0.0982548	0.0371368
-88.5974	0.0764982	0.143896	-0.07456	0.153994	-0.0979294	0.0293718	-0.04912					0.0260214	0.0955862	0.0361282
-88.4991	0.0729738	0.14563	-0.0705041	0.148046	-0.100091	0.0230751	-0.037042					0.0260126	0.0930501	0.0351696
-88.4008	0.0694072	0.147499	-0.0662468	0.142057	-0.101698	0.0162401	-0.0244511					0.0261154	0.0906896	0.0342774
-88.3025	0.0658102	0.149516	-0.0618722	0.13605	-0.10277	0.00901889	-0.0114037					0.0263356	0.0885937	0.0334853
-88.2042	0.0621887	0.151614	-0.0574439	0.129988	-0.103376	0.00158925	0.00198419					0.0266492	0.0868272	0.0328176
-88.1059	0.0584229	0.153755	-0.052928	0.123929	-0.103431	-0.00580564	0.0154893					0.0270617	0.0854055	0.0322803
-88.0076	0.0544723	0.155798	-0.0482583	0.117955	-0.102958	-0.0130992	0.0290117					0.0275601	0.0843285	0.0318732
-87.9093	0.0502814	0.157778	-0.043389	0.112122	-0.102038	-0.0202951	0.042591					0.0281502	0.0836377	0.0316121
-87.811	0.0458173	0.159667	-0.0381309	0.106524	-0.100846	-0.0273278	0.0561536					0.0288367	0.0833609	0.0315075
-87.7127	0.0411229	0.161343	-0.0324897	0.101205	-0.0993322	-0.0342878	0.0694498					0.0295731	0.0834649	0.0315468
-87.6144	0.0361947	0.16265	-0.0265648	0.0962396	-0.0974335	-0.0412691	0.0823985					0.0303165	0.0839091	0.0317147
-87.5161	0.0310072	0.163487	-0.0205256	0.0916888	-0.0952221	-0.0481726	0.0947961					0.0310083	0.0846514	0.0319952
-87.4178	0.0256104	0.163948	-0.0143583	0.087524	-0.0926809	-0.0550895	0.106534					0.0316411	0.0856632	0.0323777
-87.3195	0.0199653	0.163971	-0.00808662	0.0836523	-0.0897842	-0.0619985	0.11736					0.0321543	0.0868409	0.0328228
-87.2212	0.014045	0.163563	-0.00178021	0.0800714	-0.0865231	-0.0688612	0.127272					0.032541	0.0881384	0.0333132
-87.1229	0.00790851	0.162874	0.00446958	0.0767917	-0.0830408	-0.0755818	0.136367					0.0328269	0.0895773	0.033857
-87.0246	0.00156593	0.161876	0.0105663	0.073766	-0.0793338	-0.0819931	0.144597					0.0330063	0.0910717	0.0344219
-86.9263	-0.00506081	0.160479	0.0165067	0.0708642	-0.0755266	-0.0881793	0.152144					0.0330324	0.0926305	0.0350111
-86.828	-0.0119945	0.158709	0.022219	0.0680147	-0.071648	-0.0941853	0.15915					0.0328951	0.0942722	0.0356315
-86.7297	-0.0191853	0.156604	0.0276509	0.065205	-0.0676587	-0.0999629	0.165586					0.0326056	0.0959586	0.036269
-86.6314	-0.026556	0.154177	0.0327652	0.0624763	-0.0635759	-0.105586	0.171649					0.032193	0.0977254	0.0369367
-86.5331	-0.0339752	0.151379	0.0375171	0.0598049	-0.0594597	-0.110875	0.177401					0.0316845	0.0995178	0.0376142
-86.4348	-0.0414197	0.148215	0.0419452	0.0571336	-0.055243	-0.115861	0.182984					0.0311078	0.101342	0.0383038
-86.3365	-0.0488987	0.144664	0.0461021	0.0544956	-0.0510091	-0.120746	0.188448					0.0304364	0.10325	0.0390247
-86.2381	-0.0563635	0.140647	0.0500418	0.0519393	-0.0467819	-0.125714	0.193755					0.0296463	0.105249	0.0397804
-86.1398	-0.0637718	0.136257	0.0537681	0.0495597	-0.0425423	-0.130971	0.198993					0.0287561	0.107407	0.0405959
-86.0415	-0.0710567	0.131557	0.0573664	0.047333	-0.0384732	-0.136762	0.204136					0.0277286	0.10978	0.0414928
-85.9432	-0.0781455	0.126571	0.0609332	0.0451854	-0.034627	-0.14326	0.209147					0.0265434	0.112386	0.0424779
-85.8449	-0.0849663	0.12128	0.0644682	0.0430424	-0.0308909	-0.150418	0.213941					0.0252082	0.115164	0.043528
-85.7466	-0.0915736	0.11572	0.0677729	0.0408967	-0.0271736	-0.158146	0.218552					0.0237211	0.11809	0.0446339
-85.6483	-0.098081	0.110003	0.0708281	0.0387534	-0.0235634	-0.16641	0.223109					0.0220913	0.121213	0.0458141
-85.55	-0.104516	0.104253	0.0737113	0.0365633	-0.0200486	-0.175026	0.227574					0.0203588	0.124492	0.0470535
-85.4517	-0.110831	0.0985378	0.0765285	0.0342224	-0.0164719	-0.184077	0.231984					0.0185561	0.127941	0.0483573
-85.3534	-0.116976	0.0929187	0.0791604	0.0317418	-0.012914	-0.193496	0.236346					0.0166831	0.131535	0.0497155
-85.2551	-0.122951	0.0874046	0.0815509	0.029179	-0.00948563	-0.203227	0.240715					0.0147409	0.135263	0.0511245
-85.1568	-0.128827	0.0819663	0.0837082	0.0265629	-0.00612119	-0.213284	0.24494					0.0127066	0.139089	0.0525708
-85.0585	-0.13462	0.0764966	0.0857631	0.0239172	-0.00272384	-0.223742	0.248888					0.0105683	0.142995	0.054047
-84.9602	-0.140391	0.0709951	0.0878615	0.021244	0.000634288	-0.234674	0.252555					0.00831777	0.147015	0.0555663
-84.8619	-0.146124	0.065493	0.0900924	0.0186464	0.00399867	-0.245979	0.25591					0.0060054	0.151122	0.0571188
-84.7636	-0.151854	0.0598779	0.0924735	0.0162353	0.00745252	-0.257596	0.258809					0.00362841	0.15527	0.0586865
-84.6653	-0.157548	0.0540529	0.0950599	0.0141122	0.010979	-0.269628	0.261222					0.00117866	0.159475	0.0602758
-84.567	-0.163156	0.0480365	0.0979329	0.0122645	0.0145214	-0.281915	0.262912					-0.00134334	0.163649	0.0618533
-84.4687	-0.168682	0.0419501	0.10106	0.010681	0.0181459	-0.294474	0.263708					-0.00394438	0.167766	0.0634095
-84.3704	-0.174153	0.0358225	0.104429	0.00937614	0.0216586	-0.307192	0.263543					-0.00664517	0.171792	0.0649314
-84.2721	-0.179602	0.0296965	0.108026	0.00837136	0.0251008	-0.319806	0.262297					-0.00941671	0.175647	0.0663884
-84.1738	-0.185047	0.0236425	0.111783	0.00763872	0.0284778	-0.332115	0.260047					-0.0122247	0.179302	0.0677699
-84.0755	-0.19049	0.0176159	0.115708	0.00704955	0.0318165	-0.343943	0.256759					-0.0150692	0.18271	0.0690578
-83.9772	-0.195884	0.0114946	0.119694	0.00657317	0.0351805	-0.355054	0.252634					-0.0179087	0.185839	0.0702404
-83.8789	-0.2012	0.0053163	0.123526	0.00626945	0.0386834	-0.365286	0.247777					-0.0207019	0.188653	0.0713043
-83.7805	-0.206499	-0.000952713	0.127129	0.00617746	0.042302	-0.37473	0.242291					-0.023469	0.191201	0.072267
-83.6822	-0.211687	-0.00733999	0.130548	0.00624703	0.0460757	-0.38345	0.236283					-0.0261891	0.193514	0.0731413
-83.5839	-0.216597	-0.0138244	0.133872	0.00648139	0.0500244	-0.391252	0.229787					-0.0287869	0.19554	0.0739071
-83.4856	-0.221208	-0.0204294	0.137088	0.00687925	0.0540278	-0.398122	0.222905					-0.0312657	0.197287	0.0745674
-83.3873	-0.22558	-0.0271776	0.140213	0.00749562	0.0579265	-0.404036	0.215667					-0.0336417	0.198757	0.0751232
-83.289	-0.229752	-0.0341829	0.14333	0.00826579	0.0617291	-0.409058	0.208161					-0.0359295	0.2	0.0755928
-83.1907	-0.233683	-0.0413098	0.146516	0.00920043	0.0655549	-0.413277	0.200426					-0.0380819	0.201061	0.0759941
-83.0924	-0.237319	-0.0485302	0.149799	0.0102112	0.0692892	-0.416756	0.192591					-0.0401022	0.201969	0.0763371
-82.9941	-0.240616	-0.0557428	0.153105	0.0112387	0.0728757	-0.419443	0.184762					-0.0419743	0.202702	0.0766143
-82.8958	-0.24349	-0.0628866	0.156427	0.0122872	0.0763999	-0.421219	0.176976					-0.0436437	0.203228	0.076813
-82.7975	-0.245845	-0.069888	0.159634	0.0132435	0.0798846	-0.422058	0.169158					-0.0451244	0.20349	0.0769122
-82.6992	-0.24761	-0.0765615	0.162768	0.013985	0.0832168	-0.421991	0.161488					-0.0463865	0.203498	0.0769149
-82.6009	-0.248842	-0.0828237	0.165819	0.0143844	0.0862994	-0.420839	0.154072					-0.0474185	0.203202	0.0768031
-82.5026	-0.249598	-0.0887394	0.168738	0.0143449	0.0891715	-0.418651	0.147103					-0.048233	0.202635	0.0765889
-82.4043	-0.249939	-0.0943782	0.171504	0.0138371	0.0917723	-0.415486	0.140794					-0.0488422	0.201833	0.0762857
-82.306	-0.249867	-0.0997815	0.174057	0.0128576	0.0942714	-0.411456	0.135252					-0.0492381	0.20084	0.0759104
-82.2077	-0.249349	-0.104975	0.176389	0.0113999	0.0965745	-0.406719	0.130567					-0.0494447	0.199685	0.0754739
-82.1094	-0.248446	-0.11004	0.178545	0.00943558	0.0986264	-0.401362	0.126697					-0.0495063	0.198392	0.0749852
-82.0111	-0.247157	-0.114934	0.180583	0.00706052	0.100321	-0.395669	0.123616					-0.0494541	0.197026	0.074469
-81.9128	-0.245543	-0.119474	0.182562	0.00432237	0.101697	-0.3898	0.121155					-0.0492973	0.195618	0.0739368
-81.8145	-0.243662	-0.123687	0.184624	0.00117705	0.102612	-0.38387	0.119259					-0.0490781	0.194203	0.0734019
-81.7162	-0.241491	-0.127569	0.186878	-0.00230341	0.103004	-0.377745	0.117798					-0.0487754	0.192741	0.0728494
-81.6179	-0.239084	-0.131088	0.189387	-0.00608731	0.10278	-0.37135	0.116546					-0.0484137	0.191196	0.0722651
-81.5196	-0.236555	-0.134204	0.192026	-0.0102525	0.101921	-0.364953	0.115379					-0.0480911	0.189605	0.0716638
-81.4213	-0.233915	-0.136923	0.194781	-0.014775	0.100359	-0.358689	0.114282					-0.0478401	0.187994	0.0710549
-81.3229	-0.231064	-0.139158	0.197584	-0.0196396	0.0980929	-0.352435	0.113207					-0.0476304	0.186298	0.0704141
-81.2246	-0.228052	-0.140833	0.200403	-0.0247507	0.0952306	-0.346152	0.11206					-0.047442	0.18451	0.0697383
-81.1263	-0.224897	-0.142018	0.203206	-0.0301866	0.0917507	-0.33968	0.110824					-0.0472858	0.182594	0.0690139
-81.028	-0.22152	-0.142731	0.205883	-0.0358669	0.0878111	-0.332846	0.109431					-0.0471198	0.180494	0.0682205
-80.9297	-0.217973	-0.14296	0.208366	-0.0417101	0.0834567	-0.325632	0.107846					-0.0469438	0.17821	0.0673571
-80.8314	-0.214339	-0.142742	0.210523	-0.0477022	0.0786703	-0.318295	0.106055					-0.0468329	0.175787	0.0664412
-80.7331	-0.210698	-0.142179	0.21239	-0.0537741	0.0734569	-0.310972	0.1041					-0.0468109	0.17329	0.0654976
-80.6348	-0.207106	-0.141425	0.21394	-0.0598153	0.0678963	-0.303582	0.101871					-0.0468889	0.170714	0.0645237
-80.5365	-0.203586	-0.140542	0.215154	-0.0657408	0.0620451	-0.296246	0.0993467					-0.0470815	0.168089	0.0635316
-80.4382	-0.200207	-0.139437	0.216011	-0.071391	0.0558491	-0.288896	0.09646					-0.047373	0.165382	0.0625084
-80.3399	-0.197001	-0.138216	0.2166	-0.0767245	0.0492754	-0.281557	0.0930516					-0.047796	0.162606	0.0614594
-80.2416	-0.193888	-0.136907	0.216935	-0.0817729	0.0423283	-0.274157	0.0889526					-0.0483584	0.159723	0.0603697
-80.1433	-0.190858	-0.135488	0.217055	-0.0865608	0.0350956	-0.266543	0.0841619					-0.0490197	0.15672	0.0592347
-80.045	-0.187833	-0.133889	0.216928	-0.0910378	0.0276194	-0.25866	0.0787342					-0.049734	0.153579	0.0580475
-79.9467	-0.184873	-0.132065	0.216466	-0.0952106	0.0200134	-0.250244	0.0727469					-0.0504524	0.150256	0.0567915
-79.8484	-0.181972	-0.130103	0.21558	-0.0991167	0.0123092	-0.241235	0.0662282					-0.0511871	0.146741	0.0554629
-79.7501	-0.179092	-0.127963	0.214239	-0.102747	0.00467132	-0.231693	0.0591784					-0.0519152	0.14305	0.0540678
-79.6518	-0.176281	-0.125644	0.212385	-0.106217	-0.00280726	-0.221679	0.0517906					-0.052636	0.139227	0.0526227
-79.5535	-0.173568	-0.123191	0.209897	-0.10955	-0.010074	-0.211254	0.0442661					-0.0533534	0.13529	0.0511347
-79.4552	-0.170975	-0.120731	0.206888	-0.112666	-0.017038	-0.200375	0.036724					-0.0540245	0.131292	0.0496237
-79.3569	-0.168462	-0.118254	0.20332	-0.115603	-0.0233697	-0.18905	0.029152					-0.0546095	0.127238	0.0480916
-79.2586	-0.166122	-0.115915	0.199251	-0.118362	-0.0289421	-0.177412	0.0215598					-0.0551346	0.123197	0.0465639
-79.1603	-0.163926	-0.113774	0.194723	-0.120975	-0.0338171	-0.165481	0.013963					-0.0556126	0.119189	0.0450491
-79.062	-0.16193	-0.1119	0.189754	-0.123367	-0.0380496	-0.153475	0.00638572					-0.0560833	0.11526	0.0435644
-78.9637	-0.1603	-0.110203	0.184494	-0.12555	-0.0417276	-0.141576	-0.00113598					-0.0565712	0.1115	0.0421431
-78.8653	-0.15906	-0.108797	0.179028	-0.127612	-0.0448526	-0.129777	-0.00855135					-0.0570889	0.107959	0.0408046
-78.767	-0.158111	-0.107636	0.173431	-0.129593	-0.0474414	-0.117919	-0.015811					-0.0575829	0.104644	0.0395517
-78.6687	-0.157484	-0.106697	0.167747	-0.13147	-0.0495573	-0.105943	-0.0228735					-0.0580397	0.101581	0.0383942
-78.5704	-0.157168	-0.105962	0.161849	-0.13333	-0.0512649	-0.0939916	-0.029718					-0.0585123	0.0987649	0.0373296
-78.4721	-0.157085	-0.10536	0.155763	-0.13522	-0.0525271	-0.0821576	-0.0363315					-0.0589884	0.0962101	0.036364
-78.3738	-0.157125	-0.104985	0.149546	-0.137204	-0.0533093	-0.0705428	-0.042678					-0.0594712	0.093946	0.0355082
-78.2755	-0.157255	-0.104689	0.143135	-0.139206	-0.0535488	-0.0591699	-0.048655					-0.0599127	0.0919348	0.0347481
-78.1772	-0.157542	-0.104426	0.136569	-0.141195	-0.0533573	-0.0481584	-0.0540553					-0.0603095	0.0901896	0.0340885
-78.0789	-0.157903	-0.10421	0.129856	-0.14311	-0.0527722	-0.0376201	-0.0589113					-0.0606671	0.0886753	0.0335161
-77.9806	-0.158366	-0.104024	0.123046	-0.145031	-0.051758	-0.0277529	-0.063347					-0.0610333	0.0873923	0.0330312
-77.8823	-0.158882	-0.103947	0.116156	-0.147045	-0.0503629	-0.0187819	-0.0673903					-0.0614648	0.0863118	0.0326228
-77.784	-0.159516	-0.103986	0.109227	-0.149103	-0.0486804	-0.0107362	-0.0710191					-0.0619733	0.0854103	0.0322821
-77.6857	-0.160278	-0.104173	0.102202	-0.151185	-0.046783	-0.00358189	-0.0742227					-0.0625745	0.0846376	0.03199
-77.5874	-0.161097	-0.104441	0.0951191	-0.153246	-0.0446995	0.00261348	-0.0770564					-0.0632582	0.0839417	0.031727
-77.4891	-0.161922	-0.104713	0.0881015	-0.155227	-0.0423969	0.00787847	-0.0796106					-0.0639842	0.083307	0.0314871
-77.3908	-0.162706	-0.104903	0.081106	-0.157104	-0.0400183	0.0123232	-0.081952					-0.0647506	0.082686	0.0312524
-77.2925	-0.163477	-0.105011	0.0742413	-0.158843	-0.0378752	0.0160123	-0.0840858					-0.0655768	0.0820748	0.0310213
-77.1942	-0.164184	-0.104942	0.0674888	-0.160491	-0.0359416	0.0189952	-0.0859285					-0.0664289	0.0814405	0.0307816
-77.0959	-0.164761	-0.10464	0.0608741	-0.162078	-0.0342304	0.0212333	-0.087378					-0.0672829	0.0807459	0.0305191
-76.9976	-0.165173	-0.10411	0.0543724	-0.163641	-0.0327314	0.022966	-0.0883882					-0.0681008	0.0800028	0.0302382
-76.8993	-0.165302	-0.10343	0.0479429	-0.165201	-0.0314244	0.0242578	-0.0889581					-0.0688736	0.0791897	0.0299309
-76.801	-0.165135	-0.102548	0.0416186	-0.166689	-0.0303053	0.0250304	-0.0892168					-0.0696065	0.0782781	0.0295863
-76.7027	-0.164716	-0.101436	0.0354216	-0.168103	-0.0293885	0.0251709	-0.0891625					-0.0703161	0.0772478	0.0291969
-76.6044	-0.163937	-0.099985	0.0293682	-0.169463	-0.0285891	0.024659	-0.0888488					-0.0709708	0.0760771	0.0287544
-76.5061	-0.162798	-0.0981777	0.0236951	-0.17067	-0.0278397	0.0236774	-0.088221					-0.0714761	0.0748219	0.02828
-76.4077	-0.161319	-0.096028	0.0183637	-0.17173	-0.0271654	0.0223668	-0.0873123					-0.0718321	0.0735008	0.0277807
-76.3094	-0.159556	-0.0935301	0.0133848	-0.172654	-0.0264609	0.0208181	-0.0862036					-0.0720288	0.0721528	0.0272712
-76.2111	-0.157497	-0.0907659	0.00883297	-0.173577	-0.0257216	0.0190711	-0.0849566					-0.0720877	0.070829	0.0267708
-76.1128	-0.155163	-0.087768	0.00471835	-0.174511	-0.0249308	0.0171662	-0.0836827					-0.0720244	0.0695511	0.0262878
-76.0145	-0.152757	-0.0844969	0.000994914	-0.175525	-0.0241084	0.0150858	-0.0823297					-0.0718765	0.0683557	0.025836
-75.9162	-0.150288	-0.0810722	-0.00231562	-0.176553	-0.0232325	0.0130053	-0.0808207					-0.0716108	0.0672727	0.0254267
-75.8179	-0.147751	-0.0774793	-0.00509182	-0.177507	-0.0222919	0.0111299	-0.0791167					-0.0711582	0.0663366	0.0250729
-75.7196	-0.145023	-0.0736721	-0.00725503	-0.178435	-0.0211398	0.00950185	-0.077155					-0.0704541	0.0655687	0.0247826
-75.6213	-0.142079	-0.0696213	-0.00869788	-0.179363	-0.0199018	0.00813473	-0.0749433					-0.069496	0.064974	0.0245579
-75.523	-0.138936	-0.0652882	-0.00943156	-0.180259	-0.0186428	0.0070677	-0.0725693					-0.0682942	0.0645459	0.024396
-75.4247	-0.135596	-0.0607862	-0.00949686	-0.181206	-0.0173238	0.00615627	-0.0699491					-0.0668859	0.0642781	0.0242948
-75.3264	-0.132035	-0.0561352	-0.00887528	-0.182274	-0.0158539	0.00527439	-0.0669944					-0.0652704	0.064179	0.0242574
-75.2281	-0.128281	-0.0512949	-0.00762403	-0.183425	-0.014172	0.00434414	-0.0636608					-0.0634449	0.0642382	0.0242797
-75.1298	-0.124363	-0.0463172	-0.00576802	-0.184625	-0.0124583	0.0033421	-0.0600695					-0.0614655	0.0644312	0.0243527
-75.0315	-0.120383	-0.0412329	-0.0033181	-0.18584	-0.0107445	0.00230837	-0.0563921					-0.0593718	0.0647695	0.0244806
-74.9332	-0.116276	-0.0359868	-0.000245214	-0.187041	-0.00899579	0.00108226	-0.0526368					-0.0571571	0.065229	0.0246542
-74.8349	-0.112036	-0.030579	0.0034325	-0.188187	-0.00731556	-0.000349959	-0.0487982					-0.0548334	0.0657934	0.0248676
-74.7366	-0.107624	-0.024969	0.00765726	-0.189312	-0.00575671	-0.00192477	-0.0447785					-0.0523869	0.0664782	0.0251264
-74.6383	-0.103067	-0.0192278	0.0124025	-0.190406	-0.00432948	-0.00358093	-0.0406279					-0.0498337	0.0672937	0.0254346
-74.54	-0.098483	-0.0135202	0.0176642	-0.191465	-0.00306353	-0.00516651	-0.0363458					-0.0471971	0.0682607	0.0258001
-74.4417	-0.0938503	-0.00783074	0.0232711	-0.192563	-0.00205204	-0.00690785	-0.0320326					-0.0445665	0.0693502	0.0262119
-74.3434	-0.0892181	-0.00219756	0.0292728	-0.193638	-0.00141164	-0.00889929	-0.0277303					-0.0419746	0.0705432	0.0266628
-74.2451	-0.0845372	0.00340561	0.0355948	-0.194694	-0.00130486	-0.0111615	-0.0232938					-0.0394273	0.0718313	0.0271497
-74.1468	-0.0797749	0.00899933	0.0421758	-0.195684	-0.00184575	-0.0137186	-0.0187416					-0.0369414	0.0731985	0.0276664
-74.0485	-0.0748608	0.0146097	0.0489841	-0.19656	-0.00303677	-0.0165688	-0.0141138					-0.0345066	0.0746428	0.0282123
-73.9501	-0.0696357	0.0201336	0.0560053	-0.197306	-0.00481144	-0.0197065	-0.00942857					-0.032107	0.0761624	0.0287867
-73.8518	-0.0640925	0.0256757	0.0632129	-0.197928	-0.00733395	-0.0232922	-0.00469257					-0.0297787	0.0777812	0.0293985
-73.7535	-0.0582762	0.0312499	0.0704968	-0.198403	-0.0105785	-0.0273108	-5.29938e-05					-0.0275536	0.0795071	0.0300509
-73.6552	-0.0522219	0.0367941	0.0777859	-0.198725	-0.0146259	-0.0317475	0.0042703					-0.0254956	0.0813396	0.0307435
-73.5569	-0.0460114	0.042312	0.0851472	-0.198854	-0.0192676	-0.0365218	0.00820813					-0.0235697	0.0833102	0.0314883
-73.4586	-0.0396955	0.047625	0.092573	-0.198821	-0.024453	-0.0415117	0.0118332					-0.0217786	0.0854271	0.0322884
-73.3603	-0.0332643	0.0527968	0.0999998	-0.198603	-0.030251	-0.046413	0.0149919					-0.0201061	0.0876694	0.0331359
-73.262	-0.0267218	0.0578008	0.10741	-0.198182	-0.0366353	-0.051082	0.0174722					-0.0185625	0.0900102	0.0340207
-73.1637	-0.020025	0.0625515	0.114716	-0.197591	-0.043508	-0.0554623	0.0191788					-0.0171629	0.0924201	0.0349315
-73.0654	-0.0132414	0.0670756	0.121887	-0.196817	-0.0508056	-0.0594826	0.0202133					-0.0158816	0.0948911	0.0358655
-72.9671	-0.00633416	0.0712809	0.12884	-0.195839	-0.0584486	-0.0630344	0.0206547					-0.0146971	0.0973785	0.0368056
-72.8688	0.00058408	0.0751511	0.135557	-0.194665	-0.0664258	-0.066103	0.0204706					-0.013633	0.0998699	0.0377473
-72.7705	0.00747951	0.078703	0.142046	-0.193328	-0.0745659	-0.0685946	0.0196898					-0.0126528	0.102355	0.0386864
-72.6722	0.0143154	0.0818673	0.148357	-0.1918	-0.0828385	-0.0704085	0.0182491					-0.0117511	0.104806	0.039613
-72.5739	0.0210413	0.0846059	0.154509	-0.190021	-0.0912087	-0.0715744	0.0160858					-0.0109375	0.107202	0.0405184
-72.4756	0.0277067	0.0869435	0.160443	-0.187989	-0.0996504	-0.0722491	0.0132246					-0.0102244	0.109546	0.0414044
-72.3773	0.0343273	0.0888513	0.166218	-0.185726	-0.108053	-0.0722655	0.0096785					-0.00956693	0.111833	0.0422688
-72.279	0.0409286	0.09035	0.17172	-0.183274	-0.116306	-0.0715968	0.00536709					-0.00897301	0.114039	0.0431027
-72.1807	0.0474134	0.0914664	0.17691	-0.180614	-0.124274	-0.070227	0.00021095					-0.00844485	0.116134	0.0438944
-72.0824	0.0536946	0.0922347	0.181737	-0.177681	-0.131764	-0.0680076	-0.0058193					-0.00794367	0.118061	0.0446228
-71.9841	0.0596947	0.0927055	0.18618	-0.174497	-0.138708	-0.0649054	-0.0127151					-0.00746362	0.119818	0.0452869
-71.8858	0.0653323	0.0929458	0.190222	-0.171057	-0.145151	-0.060908	-0.0205157					-0.00701875	0.121424	0.045894
-71.7875	0.0705878	0.092935	0.193784	-0.167369	-0.150885	-0.0558197	-0.0292168					-0.00656905	0.122834	0.046427
-71.6892	0.0754553	0.0926296	0.196863	-0.163508	-0.155945	-0.049703	-0.0385603					-0.00610989	0.124084	0.0468995
-71.5909	0.0798216	0.0920215	0.199409	-0.159488	-0.160369	-0.0425416	-0.0482401					-0.00562673	0.12517	0.0473099
-71.4926	0.0836912	0.0910219	0.201207	-0.155355	-0.164193	-0.034452	-0.0581792					-0.00517977	0.126068	0.0476492
-71.3942	0.0870601	0.0897718	0.202184	-0.151103	-0.167377	-0.0256591	-0.0683842					-0.00478671	0.126795	0.0479239
-71.2959	0.0898546	0.088247	0.20236	-0.14672	-0.170012	-0.0164668	-0.0786445					-0.00448316	0.127367	0.0481404
-71.1976	0.0920412	0.0865157	0.201673	-0.142174	-0.172164	-0.00692588	-0.0887132					-0.00424966	0.127769	0.0482921
-71.0993	0.093591	0.0846202	0.200244	-0.137502	-0.174018	0.0029594	-0.0985461					-0.00409314	0.128068	0.048405
-71.001	0.0945849	0.0825878	0.198207	-0.132718	-0.175471	0.0130982	-0.108132					-0.00397774	0.128291	0.0484896
-70.9027	0.0950188	0.0805735	0.1956	-0.127849	-0.176581	0.0234122	-0.117422					-0.00389252	0.128473	0.0485581
-70.8044	0.094955	0.0785887	0.192377	-0.122911	-0.177473	0.0340102	-0.12641					-0.00383752	0.12864	0.0486214
-70.7061	0.094368	0.0765877	0.188529	-0.117921	-0.178305	0.0447737	-0.13513					-0.0038712	0.128826	0.0486915
-70.6078	0.0932673	0.0745477	0.183982	-0.11294	-0.178967	0.0555398	-0.143577					-0.00402096	0.128994	0.0487551
-70.5095	0.0917589	0.072484	0.178687	-0.108059	-0.179516	0.0663647	-0.151601					-0.00426858	0.129154	0.0488156
-70.4112	0.089877	0.0704683	0.172687	-0.103347	-0.180071	0.0773473	-0.159183					-0.00460317	0.129363	0.0488947
-70.3129	0.0875436	0.0685346	0.165961	-0.0987638	-0.180601	0.0884501	-0.166298					-0.00502493	0.129602	0.048985
-70.2146	0.0847625	0.0666167	0.158643	-0.0943504	-0.181078	0.0997016	-0.172794					-0.00549976	0.129872	0.0490872
-70.1163	0.0816283	0.0646832	0.150882	-0.0901829	-0.181533	0.11096	-0.178599					-0.006023	0.130195	0.0492091
-70.018	0.0782202	0.0627271	0.142702	-0.0863627	-0.182038	0.121979	-0.183569					-0.0066201	0.130539	0.0493391
-69.9197	0.0745372	0.0607231	0.1341	-0.0829993	-0.182631	0.132745	-0.187667					-0.00731309	0.130895	0.0494737
-69.8214	0.0706047	0.0586469	0.125175	-0.0801388	-0.183284	0.14337	-0.190806					-0.00806166	0.131266	0.0496139
-69.7231	0.0664265	0.0564996	0.116019	-0.0777975	-0.184154	0.153785	-0.193013					-0.00889064	0.131682	0.0497711
-69.6248	0.0619935	0.0543207	0.106631	-0.0759239	-0.18522	0.163901	-0.194553					-0.00983594	0.132165	0.0499535
-69.5265	0.0574748	0.0521295	0.0970863	-0.0744979	-0.186513	0.173475	-0.195619					-0.0109234	0.132724	0.0501648
-69.4282	0.0529075	0.0500383	0.087496	-0.0735205	-0.188134	0.182658	-0.196237					-0.0121131	0.133419	0.0504276
-69.3299	0.048311	0.0479599	0.0779379	-0.0730452	-0.190135	0.191603	-0.19652					-0.0134127	0.134307	0.0507631
-69.2316	0.0437287	0.0459366	0.0684216	-0.0730753	-0.192358	0.200426	-0.19662					-0.0147915	0.135406	0.0511788
-69.1333	0.0391045	0.0439088	0.0589979	-0.0736644	-0.194687	0.209148	-0.196572					-0.016252	0.136697	0.0516665
-69.035	0.0344196	0.041886	0.0495746	-0.0747881	-0.196915	0.217799	-0.196382					-0.0177724	0.138129	0.0522078
-68.9366	0.0296487	0.0397952	0.0400241	-0.0764089	-0.1991	0.22645	-0.19612					-0.0193873	0.139722	0.0528098
-68.8383	0.0247815	0.0375673	0.0303768	-0.0785407	-0.201128	0.234992	-0.19582					-0.0211101	0.14143	0.0534555
-68.74	0.0197895	0.0352041	0.0207096	-0.0811981	-0.202892	0.243196	-0.195444					-0.0229479	0.143166	0.0541115
-68.6417	0.0146928	0.0327641	0.0109909	-0.0843395	-0.204305	0.251086	-0.194914					-0.0248607	0.1449	0.0547672
-68.5434	0.00950379	0.0303715	0.00123742	-0.0879093	-0.205557	0.258668	-0.194114					-0.0268286	0.146652	0.0554292
-68.4451	0.00419974	0.0281306	-0.00853103	-0.0917957	-0.206514	0.26578	-0.193122					-0.028836	0.148358	0.0560741
-68.3468	-0.00124866	0.0259906	-0.0183713	-0.0959213	-0.207077	0.272264	-0.191944					-0.0309011	0.149944	0.0566735
-68.2485	-0.00683425	0.023941	-0.028293	-0.100283	-0.207341	0.278128	-0.190471					-0.0330219	0.151407	0.0572265
-68.1502	-0.0125402	0.0220454	-0.0383171	-0.104779	-0.207384	0.283337	-0.18862					-0.0351796	0.152733	0.0577278
-68.0519	-0.0184175	0.0203384	-0.0484863	-0.109338	-0.207272	0.287976	-0.18649					-0.0373841	0.153969	0.058195
-67.9536	-0.0244605	0.0188437	-0.0587267	-0.113908	-0.207067	0.292232	-0.184087					-0.0395962	0.15518	0.0586527
-67.8553	-0.0305719	0.0174886	-0.0689381	-0.118357	-0.206758	0.29613	-0.18143					-0.0417766	0.156362	0.0590992
-67.757	-0.036726	0.0163088	-0.0791628	-0.122619	-0.206345	0.299421	-0.178578					-0.0439572	0.15744	0.0595069
-67.6587	-0.0428759	0.0152959	-0.0893651	-0.126695	-0.205763	0.302018	-0.175415					-0.0461144	0.158361	0.059855
-67.5604	-0.0489142	0.0144745	-0.0995392	-0.130636	-0.205078	0.304013	-0.171779					-0.0482083	0.159148	0.0601522
-67.4621	-0.0549471	0.0138988	-0.109631	-0.134448	-0.204223	0.305632	-0.167528					-0.0501779	0.159851	0.060418
-67.3638	-0.0609741	0.0135076	-0.119628	-0.138086	-0.203086	0.306777	-0.162518					-0.0520012	0.16041	0.0606291
-67.2655	-0.0669779	0.0133559	-0.129445	-0.141462	-0.201693	0.30737	-0.156545					-0.053628	0.160785	0.060771
-67.1672	-0.0729722	0.0133983	-0.138972	-0.144593	-0.200228	0.307299	-0.149632					-0.0551001	0.160973	0.0608422
-67.0689	-0.0788276	0.0136189	-0.148152	-0.147483	-0.198803	0.306398	-0.141859					-0.0564439	0.160946	0.0608318
-66.9706	-0.0845013	0.0139808	-0.156867	-0.150195	-0.197478	0.304656	-0.133155					-0.0576513	0.160703	0.0607402
-66.8723	-0.0899563	0.0145387	-0.165053	-0.152779	-0.196273	0.302101	-0.123424					-0.0586921	0.160266	0.0605747
-66.774	-0.0951287	0.0153277	-0.17265	-0.155212	-0.195349	0.298852	-0.112684					-0.0595492	0.159701	0.0603614
-66.6757	-0.0999778	0.0162724	-0.179687	-0.157494	-0.194707	0.29504	-0.101098					-0.0602359	0.159075	0.0601247
-66.5774	-0.104454	0.0172997	-0.186053	-0.159646	-0.194398	0.290635	-0.0888093					-0.0607752	0.158386	0.0598644
-66.479	-0.10853	0.0182675	-0.191652	-0.161696	-0.194319	0.2857	-0.075916					-0.0611637	0.157638	0.0595817
-66.3807	-0.112228	0.019016	-0.196338	-0.163768	-0.194594	0.280504	-0.0624219					-0.061404	0.156925	0.059312
-66.2824	-0.115545	0.0195937	-0.200029	-0.165888	-0.195212	0.275173	-0.0483592					-0.0614667	0.156289	0.0590718
-66.1841	-0.11842	0.0199404	-0.202703	-0.168094	-0.196153	0.269689	-0.0338379					-0.0613684	0.155727	0.0588592
-66.0858	-0.120916	0.0200747	-0.204426	-0.17048	-0.197281	0.264071	-0.0190584					-0.0611449	0.155252	0.0586798
-65.9875	-0.123029	0.019937	-0.205277	-0.173076	-0.198584	0.258336	-0.00401382					-0.0608154	0.154886	0.0585413
-65.8892	-0.124834	0.0194824	-0.205324	-0.175897	-0.200017	0.252389	0.0111737					-0.0604326	0.154609	0.0584368
-65.7909	-0.126413	0.0187672	-0.204633	-0.178959	-0.201567	0.246123	0.026453					-0.0600327	0.154417	0.058364
-65.6926	-0.127809	0.0177956	-0.203273	-0.182232	-0.203254	0.239749	0.041702					-0.0596173	0.15438	0.05835
-65.5943	-0.129088	0.0166027	-0.20129	-0.185654	-0.2051	0.233343	0.0567928					-0.0591991	0.154519	0.0584027
-65.496	-0.130334	0.0151427	-0.19864	-0.189175	-0.206938	0.226853	0.0716401					-0.0587787	0.154779	0.0585008
-65.3977	-0.131473	0.0133606	-0.195491	-0.192744	-0.208797	0.220234	0.0859681					-0.0584203	0.155117	0.0586288
-65.2994	-0.132447	0.0112752	-0.191901	-0.196301	-0.210711	0.213562	0.0995447					-0.0581397	0.155511	0.0587775
-65.2011	-0.133239	0.00892668	-0.18803	-0.199854	-0.212642	0.206972	0.112239					-0.0579467	0.155965	0.0589493
-65.1028	-0.133805	0.00635574	-0.184017	-0.203315	-0.214452	0.200672	0.123999					-0.0577944	0.156478	0.059143
-65.0045	-0.134191	0.00350924	-0.179876	-0.2066	-0.21614	0.194889	0.13479					-0.0576599	0.15705	0.0593593
-64.9062	-0.134357	0.000357109	-0.175656	-0.209579	-0.217717	0.189533	0.144464					-0.057565	0.157583	0.0595609
-64.8079	-0.134305	-0.00309781	-0.171417	-0.212195	-0.219108	0.184484	0.152882					-0.0575367	0.157979	0.0597103
-64.7096	-0.134062	-0.00693013	-0.167296	-0.214466	-0.220209	0.179761	0.160118					-0.0575834	0.158221	0.0598018
-64.6113	-0.133576	-0.0110112	-0.163304	-0.216362	-0.221066	0.175438	0.166319					-0.0576517	0.158335	0.0598449
-64.513	-0.132928	-0.0152252	-0.159592	-0.217844	-0.221527	0.171596	0.171611					-0.0577011	0.158335	0.0598452
-64.4147	-0.132171	-0.0195104	-0.156254	-0.218895	-0.221541	0.168207	0.175996					-0.0577383	0.158201	0.0597943
-64.3164	-0.13124	-0.0237415	-0.153499	-0.219431	-0.221056	0.165086	0.179534					-0.057764	0.157885	0.059675
-64.2181	-0.130148	-0.0279394	-0.151349	-0.219402	-0.220069	0.162086	0.182244					-0.0577966	0.157342	0.0594696
-64.1198	-0.128867	-0.0319826	-0.149733	-0.218763	-0.218676	0.159095	0.18413					-0.0578279	0.15654	0.0591664
-64.0214	-0.127305	-0.0359173	-0.148548	-0.217476	-0.217038	0.156122	0.185322					-0.0578343	0.155503	0.0587747
-63.9231	-0.125381	-0.039635	-0.147735	-0.21556	-0.215144	0.153123	0.185798					-0.0577906	0.154207	0.0582849
-63.8248	-0.122997	-0.0431167	-0.147292	-0.21301	-0.212981	0.150213	0.185566					-0.0576595	0.152663	0.0577013
-63.7265	-0.120063	-0.0463615	-0.147248	-0.209881	-0.210528	0.147548	0.184672					-0.0574086	0.150913	0.0570396
-63.6282	-0.116577	-0.0493948	-0.147536	-0.206236	-0.207728	0.145027	0.183316					-0.0570184	0.148978	0.0563084
-63.5299	-0.112477	-0.0522914	-0.148223	-0.202165	-0.204442	0.142711	0.18154					-0.0564781	0.146881	0.0555156
-63.4316	-0.107744	-0.0551087	-0.149331	-0.197764	-0.200818	0.140689	0.179339					-0.0558198	0.144681	0.0546845
-63.3333	-0.102483	-0.0578028	-0.15066	-0.193075	-0.196836	0.138918	0.17701					-0.05499	0.142442	0.053838
-63.235	-0.0967397	-0.0603521	-0.152148	-0.188266	-0.192519	0.137253	0.174657					-0.0540165	0.140192	0.0529876
-63.1367	-0.0905267	-0.062842	-0.15371	-0.183474	-0.187829	0.135545	0.172223					-0.0529447	0.137905	0.0521231
-63.0384	-0.0838292	-0.0653189	-0.155337	-0.178795	-0.182679	0.133624	0.169878					-0.0517796	0.135599	0.0512515
-62.9401	-0.0767262	-0.0676692	-0.157087	-0.174252	-0.177016	0.131438	0.1677					-0.050516	0.133297	0.0503816
-62.8418	-0.0693281	-0.0697643	-0.159012	-0.169924	-0.170906	0.129135	0.165749					-0.0491502	0.131083	0.0495448
-62.7435	-0.0616452	-0.0716398	-0.161061	-0.16591	-0.16448	0.126724	0.164082					-0.0477041	0.12901	0.0487612
-62.6452	-0.053764	-0.0732484	-0.163168	-0.162221	-0.157809	0.124144	0.162569					-0.046214	0.127049	0.0480199
-62.5469	-0.0457783	-0.0746744	-0.16528	-0.15889	-0.15077	0.121358	0.161155					-0.0446971	0.125175	0.0473115
-62.4486	-0.0375929	-0.0759873	-0.167345	-0.156012	-0.143529	0.118333	0.159606					-0.0432182	0.123366	0.046628
-62.3503	-0.0291701	-0.0771187	-0.169309	-0.153598	-0.136272	0.115024	0.157846					-0.0417997	0.121621	0.0459684
-62.252	-0.0205418	-0.0780855	-0.171138	-0.151711	-0.128952	0.111584	0.155804					-0.0404345	0.119961	0.0453409
-62.1537	-0.0116478	-0.0788468	-0.172856	-0.150375	-0.121653	0.108214	0.15346					-0.0391007	0.118444	0.0447675
-62.0554	-0.00259892	-0.0795182	-0.174559	-0.149557	-0.114241	0.105098	0.150784					-0.0377987	0.117107	0.0442625
-61.9571	0.00656207	-0.0800496	-0.176363	-0.149227	-0.106575	0.102204	0.147676					-0.0365389	0.115937	0.0438201
-61.8588	0.0157302	-0.0805334	-0.178273	-0.149342	-0.0986604	0.0996179	0.144139					-0.0353316	0.114961	0.0434513
-61.7605	0.0248654	-0.0809858	-0.180282	-0.149865	-0.0905179	0.0972486	0.140294					-0.0341776	0.114202	0.0431643
-61.6622	0.0338841	-0.0813817	-0.182364	-0.150736	-0.0821943	0.0949952	0.136198					-0.0330856	0.113651	0.0429562
-61.5638	0.0428116	-0.0817226	-0.184542	-0.151951	-0.0737491	0.0929521	0.131766					-0.0320621	0.113327	0.0428337
-61.4655	0.0516387	-0.0819284	-0.186778	-0.153442	-0.0653948	0.0910547	0.126964					-0.0311266	0.11321	0.0427892
-61.3672	0.0603624	-0.0818082	-0.189122	-0.155043	-0.0570881	0.0892416	0.121782					-0.0302393	0.11326	0.0428082
-61.2689	0.0690838	-0.0813995	-0.191685	-0.156754	-0.0487747	0.0875596	0.11597					-0.0294285	0.113481	0.0428919
-61.1706	0.077782	-0.0807148	-0.19444	-0.158437	-0.0405219	0.0860735	0.109516					-0.0286775	0.113868	0.0430382
-61.0723	0.0864364	-0.0797115	-0.197423	-0.159903	-0.0323663	0.0849232	0.102541					-0.0279291	0.114445	0.0432562
-60.974	0.0949706	-0.0783069	-0.200546	-0.161113	-0.0243806	0.0841493	0.0949669					-0.02718	0.115171	0.0435305
-60.8757	0.103508	-0.0765043	-0.203772	-0.162108	-0.0166548	0.0836565	0.0868338					-0.0264344	0.116062	0.0438675
-60.7774	0.112094	-0.0744044	-0.207079	-0.162882	-0.00910908	0.0833731	0.0781806					-0.0256894	0.117132	0.0442719
-60.6791	0.120687	-0.0719898	-0.210435	-0.163362	-0.00159879	0.0833476	0.0690573					-0.0248992	0.11838	0.0447433
-60.5808	0.129401	-0.0692034	-0.213898	-0.163513	0.00588245	0.0836215	0.0595936					-0.0240166	0.119859	0.0453025
-60.4825	0.138219	-0.0659869	-0.217541	-0.1633	0.0131996	0.0841216	0.0497976					-0.02307	0.12157	0.0459491
-60.3842	0.146976	-0.062383	-0.221277	-0.162599	0.0204252	0.0848966	0.0400034					-0.021994	0.123482	0.0466717
-60.2859	0.155563	-0.058484	-0.22511	-0.161442	0.0275741	0.0859662	0.0304039					-0.0207898	0.125589	0.0474681
-60.1876	0.16389	-0.0543377	-0.228978	-0.159785	0.0345757	0.0871548	0.0210362					-0.019492	0.127811	0.0483079
-60.0893	0.171805	-0.0500462	-0.232855	-0.157664	0.0414695	0.0883897	0.0119715					-0.0181328	0.130096	0.0491717
-59.991	0.179344	-0.0454741	-0.236722	-0.155144	0.0482349	0.0895519	0.00325193					-0.0167082	0.132418	0.0500492
-59.8927	0.186469	-0.0406738	-0.240525	-0.152251	0.0547556	0.0907211	-0.00501717					-0.0152174	0.134743	0.0509282
-59.7944	0.193194	-0.0356381	-0.244238	-0.149041	0.0610274	0.0918085	-0.0128048					-0.0136703	0.137045	0.051798
-59.6961	0.199426	-0.0303481	-0.247772	-0.145577	0.067036	0.0926694	-0.0202049					-0.0121101	0.139252	0.0526324
-59.5978	0.205131	-0.0248606	-0.251076	-0.141936	0.0728096	0.0932906	-0.027233					-0.0105535	0.141345	0.0534232
-59.4995	0.210291	-0.019173	-0.254092	-0.138123	0.0783465	0.0935964	-0.0339319					-0.00901237	0.143284	0.0541562
-59.4012	0.214887	-0.0132954	-0.256767	-0.134143	0.0836736	0.0935562	-0.0402136					-0.00747185	0.14504	0.0548201
-59.3029	0.218873	-0.00739221	-0.259014	-0.130145	0.0887187	0.0932308	-0.0460249					-0.00596479	0.146589	0.0554054
-59.2046	0.222201	-0.00139446	-0.260826	-0.126174	0.0933422	0.0926827	-0.0511969					-0.0044807	0.147894	0.0558987
-59.1062	0.22488	0.00466266	-0.262307	-0.122279	0.0976241	0.091927	-0.0557245					-0.00303098	0.148983	0.0563104
-59.0079	0.226908	0.0107425	-0.263451	-0.118537	0.101573	0.0908677	-0.0596574					-0.00165063	0.149845	0.056636
-58.9096	0.228305	0.0167354	-0.264262	-0.114951	0.105099	0.0895792	-0.0629887					-0.000354724	0.15047	0.0568723
-58.8113	0.228937	0.0226216	-0.264746	-0.111512	0.108218	0.0881205	-0.0658183					0.000831356	0.150832	0.0570092
-58.713	0.228761	0.0283818	-0.264825	-0.108196	0.110829	0.086394	-0.0680404					0.00190058	0.150868	0.0570226
-58.6147	0.227822	0.0340415	-0.264479	-0.105013	0.112784	0.0844855	-0.0697769					0.00283787	0.150575	0.0569118
-58.5164	0.226032	0.0394982	-0.263563	-0.101957	0.114081	0.0822765	-0.0711908					0.00359669	0.149892	0.0566537
-58.4181	0.223393	0.0447127	-0.262047	-0.0990827	0.114683	0.0797942	-0.0722678					0.00416937	0.14881	0.0562447
-58.3198	0.220042	0.0497739	-0.260065	-0.0965014	0.114573	0.0769857	-0.0732269					0.00451162	0.147414	0.0557171
-58.2215	0.216084	0.0547205	-0.257637	-0.0941444	0.113832	0.073912	-0.0741729					0.00465621	0.145748	0.0550875
-58.1232	0.211557	0.0596374	-0.254746	-0.0920004	0.112443	0.0706941	-0.0751233					0.00463741	0.143829	0.0543621
-58.0249	0.206582	0.0646269	-0.25139	-0.0900883	0.110442	0.0673671	-0.07617					0.00448134	0.141705	0.0535596
-57.9266	0.201236	0.069572	-0.247547	-0.0884631	0.107806	0.0638643	-0.0773308					0.00416241	0.139387	0.0526833
-57.8283	0.195538	0.0745083	-0.243221	-0.0871269	0.104579	0.0600476	-0.0786202					0.00367213	0.136885	0.0517379
-57.73	0.189486	0.079473	-0.238453	-0.0860073	0.10081	0.0560489	-0.0800471					0.00304439	0.134231	0.0507344
-57.6317	0.183188	0.0844246	-0.233349	-0.0850166	0.0965611	0.0521762	-0.0816092					0.00233927	0.131493	0.0496998
-57.5334	0.176687	0.0893364	-0.228065	-0.0840693	0.0917541	0.048459	-0.0832878					0.00154493	0.128712	0.0486486
-57.4351	0.170022	0.0941716	-0.222656	-0.0831204	0.0863952	0.0448801	-0.0849144					0.000682598	0.125895	0.0475837
-57.3368	0.163145	0.0988395	-0.217204	-0.0822243	0.0806808	0.0414553	-0.0865206					-0.000261134	0.123078	0.0465191
-57.2385	0.156092	0.10338	-0.211754	-0.0813368	0.0746986	0.0380494	-0.088002					-0.0012676	0.120278	0.045461
-57.1402	0.148841	0.107663	-0.206293	-0.0804307	0.0686396	0.0346208	-0.0893618					-0.00233168	0.117491	0.0444073
-57.0419	0.141386	0.111746	-0.20076	-0.0795677	0.0624698	0.0312123	-0.0905728					-0.00344094	0.114711	0.0433566
-56.9436	0.133787	0.115669	-0.195157	-0.0787587	0.0561371	0.0277848	-0.0915613					-0.00458557	0.111948	0.0423125
-56.8453	0.126113	0.11947	-0.18952	-0.0780073	0.0497728	0.0242356	-0.0922802					-0.00574499	0.109238	0.0412879
-56.747	0.11842	0.123065	-0.183892	-0.0773439	0.0434353	0.0205427	-0.0927114					-0.00692625	0.106593	0.0402885
-56.6486	0.110777	0.126476	-0.178366	-0.076825	0.0372446	0.0168346	-0.0930132					-0.00812449	0.104091	0.0393426
-56.5503	0.103178	0.129653	-0.173085	-0.0764749	0.0312966	0.0129829	-0.0930666					-0.00935939	0.101741	0.0384545
-56.452	0.095679	0.132654	-0.168163	-0.0763453	0.025607	0.00907588	-0.0926685					-0.0105944	0.0995695	0.0376338
-56.3537	0.0883545	0.1354	-0.163635	-0.0763969	0.020279	0.00512983	-0.0917622					-0.0118044	0.0975668	0.0368768
-56.2554	0.081154	0.137834	-0.159438	-0.0765818	0.0152919	0.00118701	-0.0902368					-0.0129701	0.0956704	0.03616
-56.1571	0.0740915	0.139969	-0.15563	-0.0769955	0.0107705	-0.002743	-0.0881163					-0.0140934	0.0939053	0.0354929
-56.0588	0.0672689	0.141717	-0.152245	-0.077664	0.00676445	-0.00670138	-0.0853789					-0.015177	0.0922627	0.034872
-55.9605	0.0607273	0.142965	-0.149368	-0.0785298	0.00323734	-0.0106686	-0.0819144					-0.0162216	0.090709	0.0342848
-55.8622	0.0544225	0.143714	-0.14701	-0.0795086	0.000154609	-0.0145569	-0.07778					-0.0172235	0.0892304	0.0337259
-55.7639	0.0484199	0.143945	-0.145124	-0.0806255	-0.0024892	-0.0182989	-0.0730327					-0.0181722	0.0878221	0.0331936
-55.6656	0.0428192	0.14358	-0.143727	-0.0819259	-0.00479718	-0.0220052	-0.0676432					-0.0190999	0.0864763	0.032685
-55.5673	0.0376079	0.14264	-0.142777	-0.0834618	-0.00682283	-0.0258331	-0.0616449					-0.0200417	0.0852006	0.0322028
-55.469	0.0327986	0.141164	-0.142102	-0.0852873	-0.00854997	-0.0297373	-0.0550835					-0.0209711	0.0839924	0.0317462
-55.3707	0.0283736	0.139234	-0.141682	-0.0874747	-0.00991077	-0.033667	-0.0481555					-0.0218975	0.0829035	0.0313346
-55.2724	0.0244179	0.136945	-0.141454	-0.0899633	-0.0110348	-0.0376476	-0.0409586					-0.0228136	0.0819636	0.0309793
-55.1741	0.0209609	0.134312	-0.141384	-0.0927532	-0.0119217	-0.0415515	-0.0336657					-0.0237148	0.081185	0.030685
-55.0758	0.0180639	0.131445	-0.1415	-0.0958129	-0.0126499	-0.0453811	-0.0263169					-0.0245931	0.0806092	0.0304674
-54.9775	0.0157171	0.128285	-0.141839	-0.0991056	-0.013169	-0.0491252	-0.0189022					-0.0254485	0.0802274	0.0303231
-54.8792	0.0138673	0.12488	-0.142356	-0.10264	-0.0134324	-0.052744	-0.0115409					-0.0262808	0.0800431	0.0302534
-54.7809	0.0124261	0.121296	-0.143038	-0.106375	-0.0135162	-0.0562028	-0.0042948					-0.0271007	0.0800547	0.0302578
-54.6826	0.0114544	0.11765	-0.143833	-0.110245	-0.0134271	-0.0593676	0.00275093					-0.0278596	0.0802621	0.0303362
-54.5843	0.0109878	0.113966	-0.144707	-0.114137	-0.0132737	-0.0622627	0.00954989					-0.0285539	0.0806343	0.0304769
-54.486	0.0110071	0.110313	-0.145541	-0.117997	-0.0131083	-0.0647944	0.0160407					-0.0291542	0.0811287	0.0306638
-54.3877	0.0115011	0.106647	-0.146271	-0.121821	-0.0128133	-0.0668647	0.0220854					-0.0296481	0.0816886	0.0308754
-54.2894	0.0124115	0.103145	-0.146846	-0.125593	-0.0123739	-0.0685781	0.0275859					-0.0300355	0.0823167	0.0311128
-54.1911	0.0137645	0.0997282	-0.147198	-0.129291	-0.0117979	-0.0699585	0.0324299					-0.0303319	0.0829489	0.0313518
-54.0927	0.015487	0.0963526	-0.147237	-0.132812	-0.0111193	-0.0710183	0.0365548					-0.0305417	0.0835082	0.0315631
-53.9944	0.017456	0.0930948	-0.146969	-0.136175	-0.0103517	-0.071797	0.03985					-0.0306988	0.0839795	0.0317413
-53.8961	0.0195868	0.0900773	-0.146284	-0.139448	-0.00945187	-0.0723741	0.0421966					-0.0308138	0.0843492	0.031881
-53.7978	0.0218972	0.0873189	-0.145173	-0.142621	-0.00830253	-0.0727067	0.0436447					-0.0308489	0.0846154	0.0319816
-53.6995	0.0243104	0.0848887	-0.143729	-0.145648	-0.00688189	-0.0726995	0.0441627					-0.0307995	0.084778	0.0320431
-53.6012	0.0267018	0.0828814	-0.141956	-0.148512	-0.00509489	-0.0723196	0.0437832					-0.030645	0.0848432	0.0320677
-53.5029	0.0290613	0.0813187	-0.139917	-0.151278	-0.00293704	-0.0714909	0.0426233					-0.0303742	0.0848504	0.0320704
-53.4046	0.0313976	0.0802267	-0.137659	-0.153941	-0.000324952	-0.0702672	0.0406573					-0.0299873	0.0848242	0.0320605
-53.3063	0.0337257	0.0795277	-0.135121	-0.156452	0.00265883	-0.0687074	0.0379672					-0.0294859	0.0847521	0.0320333
-53.208	0.0360428	0.079176	-0.132275	-0.158875	0.00604681	-0.066633	0.0346302					-0.028841	0.0846496	0.0319945
-53.1097	0.0384112	0.0791303	-0.129184	-0.161187	0.00978303	-0.0641013	0.0306532					-0.0280706	0.0845452	0.0319551
-53.0114	0.0407877	0.0793191	-0.125785	-0.163352	0.01375	-0.061194	0.0260935					-0.0271974	0.0844291	0.0319112
-52.9131	0.0432117	0.0797429	-0.122046	-0.165318	0.0178812	-0.0579749	0.0208775					-0.0262322	0.0843049	0.0318643
-52.8148	0.0456973	0.0802893	-0.118005	-0.167071	0.0221947	-0.0544586	0.0150914					-0.0251801	0.0841937	0.0318222
-52.7165	0.0482557	0.0808499	-0.113648	-0.168657	0.0266306	-0.0505881	0.00877973					-0.0240539	0.0841102	0.0317907
-52.6182	0.0508327	0.0813928	-0.108965	-0.170135	0.0311716	-0.0466055	0.00208317					-0.0228893	0.0840992	0.0317865
-52.5199	0.0533836	0.0819795	-0.10389	-0.171602	0.0359146	-0.0425131	-0.00492153					-0.0216641	0.0842164	0.0318308
-52.4216	0.0558459	0.0825866	-0.0984887	-0.173122	0.0408753	-0.0382977	-0.0121767					-0.0203968	0.0845021	0.0319388
-52.3233	0.0582146	0.0832375	-0.0927861	-0.174645	0.0458602	-0.0340153	-0.0195828					-0.0191024	0.0849512	0.0321085
-52.225	0.0604815	0.083789	-0.0867834	-0.176193	0.0508495	-0.0294657	-0.0271568					-0.0177826	0.08555	0.0323349
-52.1267	0.0626805	0.084415	-0.0805565	-0.177805	0.0558809	-0.0246973	-0.0347996					-0.0164117	0.0863688	0.0326443
-52.0284	0.0648849	0.0851423	-0.0741429	-0.179523	0.0607956	-0.0197723	-0.0423272					-0.0149918	0.0874156	0.03304
-51.9301	0.0670554	0.0858884	-0.0675093	-0.181295	0.0655225	-0.0146243	-0.0496682					-0.0135186	0.0886352	0.0335009
-51.8318	0.0691604	0.0865824	-0.0606676	-0.18308	0.0700058	-0.0092536	-0.0567539					-0.0120009	0.0899823	0.0340101
-51.7335	0.0711517	0.0872512	-0.0535885	-0.184936	0.0741457	-0.00360982	-0.0635268					-0.0104447	0.0914418	0.0345617
-51.6351	0.0730292	0.0878356	-0.0461711	-0.186855	0.0779069	0.00224116	-0.0699985					-0.00885878	0.0929821	0.0351439
-51.5368	0.0748281	0.0882808	-0.0383095	-0.188831	0.0813043	0.00817925	-0.0762235					-0.00725311	0.0945943	0.0357533
-51.4385	0.0764966	0.0885732	-0.029895	-0.190778	0.0843827	0.0141093	-0.0823099					-0.00563159	0.0962581	0.0363821
-51.3402	0.0780344	0.0886853	-0.020901	-0.192687	0.0870824	0.0200266	-0.0882599					-0.00400273	0.0979662	0.0370277
-51.2419	0.0793683	0.0886409	-0.0114049	-0.194544	0.0893733	0.0259677	-0.094074					-0.0023818	0.0997182	0.0376899
-51.1436	0.0803966	0.0884507	-0.00146336	-0.196284	0.0911512	0.0316917	-0.0997096					-0.000823782	0.101466	0.0383504
-51.0453	0.0809453	0.088141	0.00897454	-0.197931	0.0923657	0.0371117	-0.105084					0.000646321	0.103182	0.0389993
-50.947	0.080957	0.0877364	0.0198901	-0.199558	0.0930674	0.0423428	-0.110363					0.00201036	0.104933	0.0396611
-50.8487	0.0803986	0.0872703	0.0312816	-0.201219	0.0934001	0.0474318	-0.115474					0.00329848	0.106757	0.0403503
-50.7504	0.0792557	0.0867952	0.043084	-0.202909	0.0933454	0.0524757	-0.120428					0.00451704	0.108674	0.0410749
-50.6521	0.0775673	0.0863906	0.0552093	-0.204652	0.0930054	0.0575025	-0.125238					0.00568351	0.110729	0.0418515
-50.5538	0.0753388	0.0859474	0.0676467	-0.206466	0.0923954	0.062617	-0.129895					0.00679776	0.112931	0.042684
-50.4555	0.0725843	0.0853623	0.0802218	-0.208363	0.0915041	0.0677615	-0.134398					0.00781031	0.115268	0.0435671
-50.3572	0.0694357	0.0846215	0.0929616	-0.210294	0.0903003	0.0727673	-0.138836					0.00870812	0.117741	0.0445021
-50.2589	0.0659556	0.0837436	0.105851	-0.212323	0.0889081	0.0776485	-0.143279					0.00950072	0.120404	0.0455084
-50.1606	0.0622301	0.0827715	0.118834	-0.214406	0.0872563	0.082254	-0.147687					0.010179	0.123219	0.0465724
-50.0623	0.0582402	0.0815868	0.13193	-0.216513	0.0852875	0.0865228	-0.152093					0.0107088	0.126164	0.0476855
-49.964	0.0539901	0.0801452	0.145144	-0.218653	0.0831057	0.0904978	-0.156611					0.0110884	0.129271	0.0488598
-49.8657	0.0496108	0.0784468	0.158405	-0.220841	0.0807615	0.0942206	-0.161125					0.0113541	0.132523	0.050089
-49.7674	0.0451616	0.0764526	0.171667	-0.223059	0.0781886	0.0977496	-0.165677					0.0114977	0.13591	0.0513693
-49.6691	0.0406604	0.0741166	0.1848	-0.225242	0.0754516	0.100998	-0.170247					0.0115055	0.139377	0.0526797
-49.5708	0.0361196	0.0714409	0.197709	-0.227472	0.0726738	0.103914	-0.174666					0.0113885	0.142889	0.0540069
-49.4725	0.0315792	0.0684017	0.210256	-0.229783	0.0697486	0.10666	-0.17897					0.0111274	0.146428	0.0553447
-49.3742	0.0270776	0.0649637	0.222275	-0.232163	0.0665757	0.109288	-0.183095					0.0107031	0.149932	0.056669
-49.2759	0.0226175	0.0611429	0.233683	-0.234595	0.0632331	0.111836	-0.186959					0.0101369	0.153359	0.0579642
-49.1775	0.0182701	0.0570269	0.24441	-0.237112	0.059802	0.114364	-0.190469					0.00947043	0.156685	0.0592212
-49.0792	0.0141638	0.0526059	0.254418	-0.239767	0.0563619	0.117015	-0.19365					0.00873537	0.159919	0.0604439
-48.9809	0.0104424	0.0479042	0.26367	-0.242527	0.0530268	0.119913	-0.196513					0.00798806	0.163054	0.0616287
-48.8826	0.00717874	0.0429294	0.27209	-0.245349	0.0498559	0.123008	-0.198843					0.00726716	0.166007	0.0627448
-48.7843	0.00438082	0.0376026	0.279674	-0.248204	0.0466863	0.126217	-0.200653					0.00652912	0.168747	0.0637804
-48.686	0.00202287	0.0318813	0.286515	-0.251078	0.0435372	0.129437	-0.202056					0.00575122	0.171296	0.0647438
-48.5877	0.000117834	0.0257058	0.292717	-0.253931	0.0403745	0.132452	-0.203047					0.0049128	0.173641	0.0656301
-48.4894	-0.00130495	0.0192434	0.298253	-0.256671	0.0371763	0.13525	-0.20365					0.00404243	0.17576	0.0664309
-48.3911	-0.00230967	0.0125926	0.303192	-0.259187	0.0338907	0.137937	-0.203864					0.00317892	0.177656	0.0671477
-48.2928	-0.0030218	0.00577773	0.30748	-0.261501	0.0305592	0.140654	-0.203672					0.002325	0.179337	0.0677828
-48.1945	-0.00355974	-0.00123539	0.311074	-0.263531	0.0271298	0.143236	-0.203064					0.00143568	0.180753	0.0683184
-48.0962	-0.0040733	-0.00844834	0.313972	-0.265315	0.02371	0.14576	-0.201986					0.00051724	0.18192	0.0687591
-47.9979	-0.00464899	-0.0158268	0.316156	-0.266876	0.0203293	0.14832	-0.200502					-0.000435452	0.182859	0.0691141
-47.8996	-0.00536137	-0.0232942	0.317627	-0.268209	0.0169924	0.150893	-0.198538					-0.00141288	0.183558	0.0693784
-47.8013	-0.00621534	-0.0307848	0.318438	-0.269344	0.0137604	0.153364	-0.196285					-0.0024381	0.184054	0.0695659
-47.703	-0.00718796	-0.0381889	0.31852	-0.270303	0.0108126	0.155671	-0.193741					-0.00348832	0.184325	0.0696683
-47.6047	-0.00825635	-0.0454733	0.317929	-0.271121	0.00806227	0.157852	-0.190945					-0.00456463	0.184398	0.0696957
-47.5064	-0.00944468	-0.0527185	0.316672	-0.271742	0.00540327	0.159882	-0.18802					-0.00570973	0.184278	0.0696505
-47.4081	-0.0107481	-0.0598585	0.314839	-0.272123	0.0029408	0.161575	-0.184909					-0.00689759	0.183944	0.0695241
-47.3098	-0.0121327	-0.0668393	0.312541	-0.272336	0.000793768	0.162802	-0.1817					-0.00812442	0.183428	0.0693294
-47.2115	-0.0135919	-0.0736691	0.309782	-0.272392	-0.00111144	0.163521	-0.178461					-0.00941752	0.182734	0.0690669
-47.1132	-0.0151973	-0.0805106	0.306654	-0.272253	-0.00281094	0.163687	-0.175341					-0.0108245	0.181894	0.0687493
-47.0149	-0.0170306	-0.0873509	0.303202	-0.271905	-0.00425517	0.163257	-0.172386					-0.0123526	0.180912	0.0683783
-46.9166	-0.0190828	-0.094221	0.299468	-0.27138	-0.00543013	0.162269	-0.169611					-0.0139983	0.179812	0.0679626
-46.8183	-0.0213282	-0.101115	0.295518	-0.270688	-0.00637511	0.160642	-0.167227					-0.0157961	0.178624	0.0675137
-46.7199	-0.02372	-0.107866	0.291305	-0.269795	-0.00702451	0.158433	-0.165276					-0.0177062	0.177328	0.0670239
-46.6216	-0.02617	-0.114421	0.28679	-0.268696	-0.00747586	0.15569	-0.163542					-0.0196893	0.175886	0.0664786
-46.5233	-0.0287045	-0.120694	0.2819	-0.267393	-0.00774883	0.152654	-0.162104					-0.0217273	0.174313	0.065884
-46.425	-0.0313062	-0.126804	0.276606	-0.265953	-0.00781711	0.149374	-0.160989					-0.0238414	0.172632	0.0652489
-46.3267	-0.0339425	-0.132778	0.270962	-0.264471	-0.00761531	0.145768	-0.16009					-0.0260238	0.170856	0.0645773
-46.2284	-0.0364867	-0.13865	0.265021	-0.262916	-0.0071292	0.141808	-0.159301					-0.0282363	0.168977	0.0638673
-46.1301	-0.0388268	-0.144435	0.258848	-0.261319	-0.00633082	0.137645	-0.158651					-0.0304385	0.167046	0.0631373
-46.0318	-0.0408026	-0.150135	0.252521	-0.259703	-0.0052041	0.133266	-0.158147					-0.0326008	0.165087	0.062397
-45.9335	-0.0422521	-0.155715	0.246063	-0.258051	-0.00367436	0.128659	-0.157648					-0.0346599	0.163086	0.0616408
-45.8352	-0.0431924	-0.161192	0.239475	-0.256349	-0.00182487	0.123867	-0.157212					-0.0366326	0.161059	0.0608746
-45.7369	-0.0436756	-0.166608	0.232796	-0.254549	0.000268263	0.118911	-0.156729					-0.0385126	0.159004	0.0600979
-45.6386	-0.0437792	-0.171999	0.226227	-0.252648	0.00252388	0.113758	-0.156087					-0.0402864	0.156962	0.0593261
-45.5403	-0.0435751	-0.177258	0.219826	-0.250627	0.0050479	0.108391	-0.155296					-0.0419273	0.154939	0.0585613
-45.442	-0.0430231	-0.182241	0.213701	-0.248469	0.00786454	0.102937	-0.15426					-0.0433559	0.152954	0.0578111
-45.3437	-0.0421822	-0.186976	0.207885	-0.246202	0.0109261	0.0977076	-0.152908					-0.0445357	0.15106	0.0570953
-45.2454	-0.0411237	-0.191459	0.202379	-0.243774	0.0141908	0.0928142	-0.151089					-0.0454375	0.149247	0.0564101
-45.1471	-0.0398934	-0.195642	0.197245	-0.241238	0.0176478	0.088344	-0.1487					-0.0460339	0.147533	0.0557623
-45.0488	-0.0384443	-0.199381	0.192468	-0.238613	0.021381	0.0843012	-0.145677					-0.0462806	0.145898	0.0551441
-44.9505	-0.0367674	-0.20259	0.188085	-0.235842	0.0253289	0.0806373	-0.141995					-0.0461633	0.144312	0.0545448
-44.8522	-0.0349551	-0.205216	0.184089	-0.232938	0.0294896	0.0772329	-0.137669					-0.0457095	0.142751	0.053955
-44.7539	-0.0330126	-0.20726	0.180475	-0.22993	0.0339774	0.0742087	-0.132497					-0.0448627	0.141226	0.0533785
-44.6556	-0.030968	-0.208826	0.177392	-0.22691	0.0387275	0.0714553	-0.12635					-0.0436401	0.139777	0.0528306
-44.5573	-0.028906	-0.209907	0.174926	-0.223936	0.0437691	0.0689644	-0.119352					-0.042063	0.138448	0.0523284
-44.459	-0.0268454	-0.210541	0.173155	-0.221063	0.0491459	0.0665918	-0.111396					-0.040136	0.13726	0.0518794
-44.3607	-0.0248626	-0.210589	0.172161	-0.218285	0.0547828	0.0642167	-0.102517					-0.0378704	0.136198	0.051478
-44.2623	-0.0229921	-0.210147	0.171901	-0.215626	0.0605823	0.0618991	-0.0928105					-0.0353133	0.135289	0.0511343
-44.164	-0.021311	-0.209263	0.172422	-0.213157	0.0665536	0.059615	-0.0823683					-0.0325012	0.134581	0.0508667
-44.0657	-0.0199319	-0.207782	0.173774	-0.210908	0.0726058	0.0572829	-0.0710555					-0.0294307	0.134052	0.0506668
-43.9674	-0.0189662	-0.205664	0.17593	-0.208872	0.0786043	0.0548679	-0.0588479					-0.0261354	0.133688	0.0505293
-43.8691	-0.01855	-0.202962	0.178923	-0.207059	0.0844067	0.0523293	-0.0458885					-0.0226859	0.133519	0.0504653
-43.7708	-0.0185969	-0.19966	0.182735	-0.205503	0.0900393	0.0496481	-0.0321211					-0.0190655	0.133573	0.050486
-43.6725	-0.0190749	-0.195733	0.187335	-0.20425	0.0954836	0.0468583	-0.0174824					-0.0152662	0.133884	0.0506035
-43.5742	-0.0199081	-0.191233	0.192609	-0.203332	0.10069	0.0440691	-0.0022387					-0.0113348	0.13448	0.0508288
-43.4759	-0.0209893	-0.186355	0.198602	-0.202803	0.105507	0.0412688	0.0135009					-0.00732406	0.135426	0.0511864
-43.3776	-0.02228	-0.181184	0.205245	-0.20271	0.109849	0.0384103	0.0296563					-0.0032875	0.136741	0.0516833
-43.2793	-0.0237257	-0.175767	0.212476	-0.203044	0.113691	0.0352592	0.0461307					0.000717187	0.138422	0.0523184
-43.181	-0.0252338	-0.170137	0.220329	-0.203814	0.116933	0.0317894	0.0627783					0.00466367	0.140479	0.0530962
-43.0827	-0.0268021	-0.164366	0.22879	-0.204987	0.119532	0.0279362	0.07948					0.00851205	0.142917	0.0540176
-42.9844	-0.0284317	-0.158528	0.23787	-0.20658	0.121415	0.0237502	0.0961857					0.0122403	0.145752	0.0550891
-42.8861	-0.0301167	-0.152739	0.247503	-0.208633	0.122515	0.0193357	0.112834					0.0158143	0.14899	0.056313
-42.7878	-0.0318911	-0.147079	0.257646	-0.211103	0.122719	0.0147658	0.129425					0.019212	0.152615	0.0576832
-42.6895	-0.03381	-0.141526	0.268305	-0.213964	0.121919	0.0100125	0.145873					0.0224013	0.156603	0.0591904
-42.5912	-0.0359423	-0.136049	0.279379	-0.217171	0.120199	0.0052541	0.161981					0.0253787	0.1609	0.0608146
-42.4929	-0.0382122	-0.130572	0.290809	-0.220683	0.117661	0.000504169	0.177644					0.0281644	0.165456	0.0625364
-42.3946	-0.0405951	-0.125142	0.3025	-0.224411	0.114259	-0.00410629	0.1928					0.0307577	0.170209	0.0643328
-42.2963	-0.0430604	-0.11988	0.314419	-0.228303	0.110091	-0.0084013	0.207488					0.0331934	0.175147	0.0661995
-42.198	-0.0454957	-0.114682	0.326635	-0.232259	0.105226	-0.012443	0.221658					0.0355199	0.180232	0.0681212
-42.0997	-0.047839	-0.109452	0.339091	-0.236198	0.0996222	-0.0162511	0.235307					0.0377544	0.185403	0.0700759
-42.0014	-0.0499952	-0.104388	0.351665	-0.24007	0.0933636	-0.0197967	0.248257					0.0398624	0.190606	0.0720424
-41.9031	-0.0519127	-0.0994808	0.364277	-0.243851	0.0864817	-0.0230029	0.26041					0.0418458	0.195783	0.0739989
-41.8048	-0.0535566	-0.0946728	0.376825	-0.24751	0.0790892	-0.02573	0.271866					0.0437587	0.200896	0.0759315
-41.7064	-0.0549455	-0.0900003	0.389308	-0.251025	0.0712324	-0.0280446	0.282443					0.0455667	0.20591	0.0778268
-41.6081	-0.0561363	-0.0854466	0.401593	-0.254415	0.0630191	-0.0299568	0.291969					0.0472323	0.210766	0.0796619
-41.5098	-0.0571806	-0.0809588	0.413633	-0.257577	0.0545238	-0.0315331	0.300744					0.0488072	0.215473	0.0814412
-41.4115	-0.0581144	-0.0763647	0.425299	-0.260399	0.0458388	-0.0327894	0.308895					0.050338	0.219984	0.0831461
-41.3132	-0.0589647	-0.0716569	0.43655	-0.262839	0.0370247	-0.0337614	0.316298					0.0518073	0.224257	0.0847612
-41.2149	-0.0597441	-0.0667544	0.44741	-0.264897	0.0282083	-0.0343808	0.322915					0.053251	0.228278	0.0862808
-41.1166	-0.0605291	-0.0616298	0.457831	-0.266563	0.0194628	-0.0346554	0.328794					0.0546729	0.232037	0.0877017
-41.0183	-0.0612521	-0.0562435	0.467756	-0.267766	0.0108543	-0.0345868	0.333904					0.0560951	0.23549	0.0890069
-40.92	-0.0618891	-0.0505833	0.477161	-0.268494	0.00238789	-0.0342433	0.338238					0.0575109	0.238624	0.0901915
-40.8217	-0.0623736	-0.0446702	0.486088	-0.268771	-0.0058686	-0.0337591	0.341844					0.0589272	0.241463	0.0912644
-40.7234	-0.0626059	-0.0384171	0.494543	-0.268625	-0.01385	-0.0331251	0.344715					0.0603764	0.243993	0.0922206
-40.6251	-0.0625552	-0.0318602	0.502466	-0.268042	-0.0215992	-0.0324479	0.346705					0.0618094	0.246179	0.0930468
-40.5268	-0.0621222	-0.0250777	0.509835	-0.267002	-0.0291642	-0.0317873	0.347888					0.0632243	0.248025	0.0937447
-40.4285	-0.0613754	-0.018249	0.516619	-0.265471	-0.0366608	-0.0311213	0.348302					0.0645776	0.249544	0.0943187
-40.3302	-0.0603184	-0.0113928	0.522811	-0.263505	-0.0440976	-0.030643	0.347875					0.0658185	0.250745	0.0947726
-40.2319	-0.0589016	-0.00450185	0.528436	-0.261122	-0.0515516	-0.0303449	0.346568					0.0669403	0.251635	0.095109
-40.1336	-0.0572083	0.00237285	0.533387	-0.258373	-0.0590205	-0.0302432	0.344374					0.0678984	0.252207	0.0953251
-40.0353	-0.0553012	0.00923359	0.537654	-0.255336	-0.0665972	-0.0302839	0.341308					0.0686682	0.252487	0.0954311
-39.937	-0.0531719	0.0161617	0.541314	-0.252073	-0.0742521	-0.0304551	0.337343					0.0692666	0.252504	0.0954374
-39.8387	-0.0508134	0.023077	0.544398	-0.248599	-0.0818987	-0.0309414	0.332439					0.0696659	0.252273	0.0953504
-39.7404	-0.0482	0.0299478	0.546963	-0.244941	-0.0895536	-0.0318274	0.326467					0.0698367	0.25181	0.0951753
-39.6421	-0.0453506	0.0367827	0.54898	-0.241054	-0.0971831	-0.0330196	0.31946					0.0698022	0.251106	0.0949091
-39.5438	-0.0421823	0.0435258	0.550577	-0.236818	-0.104817	-0.0345525	0.311441					0.0695963	0.250189	0.0945626
-39.4455	-0.0386364	0.0501339	0.55175	-0.232266	-0.112452	-0.0363206	0.302248					0.0692082	0.249047	0.094131
-39.3471	-0.0347381	0.0564393	0.552567	-0.227479	-0.120056	-0.0383142	0.291837					0.068608	0.247724	0.0936308
-39.2488	-0.0304623	0.0624724	0.553072	-0.222385	-0.12759	-0.0404898	0.280338					0.0678507	0.246245	0.0930719
-39.1505	-0.0258703	0.0682084	0.553155	-0.216965	-0.135109	-0.0428323	0.267692					0.066897	0.244598	0.0924494
-39.0522	-0.0209237	0.0735103	0.552766	-0.211267	-0.14255	-0.0452977	0.253783					0.0657174	0.242774	0.0917598
-38.9539	-0.0156446	0.0783165	0.55192	-0.205345	-0.149862	-0.0478492	0.238596					0.0643046	0.240799	0.0910136
-38.8556	-0.0100799	0.082617	0.550611	-0.199165	-0.157003	-0.0504497	0.222245					0.0626821	0.238702	0.0902209
-38.7573	-0.0043258	0.0864666	0.548822	-0.192694	-0.163902	-0.052959	0.204707					0.0608735	0.236482	0.0893818
-38.659	0.0016325	0.0897886	0.546537	-0.185952	-0.170506	-0.0554265	0.186003					0.058868	0.234164	0.0885055
-38.5607	0.00781387	0.0926153	0.543759	-0.178947	-0.176748	-0.0577928	0.16637					0.0567245	0.231785	0.0876064
-38.4624	0.0141614	0.095029	0.540403	-0.171652	-0.182543	-0.0600768	0.145831					0.0544502	0.229339	0.086682
-38.3641	0.0206802	0.0971301	0.53639	-0.16413	-0.187732	-0.0623891	0.12458					0.0520757	0.226838	0.0857366
-38.2658	0.0274	0.0990657	0.531776	-0.156331	-0.192175	-0.0644998	0.10272					0.0497078	0.224288	0.084773
-38.1675	0.0342192	0.100876	0.526413	-0.148315	-0.195717	-0.0664982	0.0802497					0.0473183	0.221665	0.0837816
-38.0692	0.041191	0.102622	0.520367	-0.1401	-0.198321	-0.0683456	0.0572158					0.0449471	0.219015	0.0827798
-37.9709	0.0483822	0.104259	0.513611	-0.131605	-0.19976	-0.0699768	0.0336836					0.0426564	0.216308	0.0817569
-37.8726	0.0557369	0.105787	0.506052	-0.122784	-0.200022	-0.071348	0.009794					0.0404594	0.213541	0.0807109
-37.7743	0.0632429	0.10724	0.497726	-0.113624	-0.199152	-0.0721959	-0.0143337					0.0384148	0.210744	0.0796537
-37.676	0.0708913	0.108529	0.488655	-0.10412	-0.197156	-0.072501	-0.0385833					0.0365307	0.20795	0.0785978
-37.5777	0.0786824	0.109662	0.478853	-0.0943495	-0.194099	-0.0723583	-0.062744					0.0348066	0.205213	0.0775631
-37.4794	0.0865787	0.110626	0.468224	-0.0844274	-0.19012	-0.0716643	-0.0866743					0.0332203	0.202543	0.0765539
-37.3811	0.0945279	0.111404	0.45681	-0.0744545	-0.185245	-0.0705108	-0.110367					0.0317378	0.199994	0.0755905
-37.2828	0.102539	0.112141	0.444582	-0.064436	-0.179491	-0.0688881	-0.133809					0.0303769	0.197594	0.0746834
-37.1845	0.11052	0.112805	0.431422	-0.0545337	-0.172948	-0.0668494	-0.156973					0.0290632	0.195356	0.0738375
-37.0862	0.118494	0.113363	0.417414	-0.0448095	-0.165728	-0.0645069	-0.179664					0.0277948	0.193329	0.0730715
-36.9879	0.126431	0.114073	0.402633	-0.0352511	-0.157886	-0.0618957	-0.201692					0.0266304	0.191546	0.0723974
-36.8896	0.134296	0.114994	0.387107	-0.0258848	-0.149475	-0.0591419	-0.222918					0.0255681	0.190014	0.0718187
-36.7912	0.142109	0.116113	0.370837	-0.0168072	-0.140547	-0.0563245	-0.243448					0.0245618	0.188774	0.0713499
-36.6929	0.149917	0.117369	0.353863	-0.00804137	-0.131158	-0.0535394	-0.263177					0.0236046	0.187832	0.0709936
-36.5946	0.157628	0.118762	0.336341	0.000440599	-0.121391	-0.0507854	-0.282043					0.0227075	0.187209	0.0707583
-36.4963	0.165231	0.120195	0.318334	0.00858573	-0.111346	-0.0479552	-0.300215					0.0218329	0.186948	0.0706599
-36.398	0.172766	0.121622	0.300063	0.0162872	-0.101082	-0.0450159	-0.31776					0.0209829	0.187112	0.0707217
-36.2997	0.180208	0.123004	0.281682	0.0235662	-0.0907611	-0.0419649	-0.334802					0.0201332	0.187753	0.070964
-36.2014	0.187462	0.12418	0.263171	0.0303529	-0.0805979	-0.0389963	-0.351311					0.0191801	0.188832	0.071372
-36.1031	0.194591	0.125134	0.244675	0.0366538	-0.0706892	-0.036097	-0.367187					0.0181543	0.19032	0.0719343
-36.0048	0.201479	0.12578	0.226229	0.0424824	-0.0611267	-0.0333159	-0.382411					0.0170168	0.192152	0.0726266
-35.9065	0.207924	0.126027	0.207946	0.0477875	-0.0520479	-0.0308228	-0.396999					0.0156879	0.19427	0.073427
-35.8082	0.213899	0.125917	0.189908	0.0525375	-0.0434794	-0.0287157	-0.410997					0.0141528	0.196638	0.074322
-35.7099	0.219346	0.125419	0.172156	0.0567315	-0.0354398	-0.0272562	-0.424395					0.012366	0.199191	0.075287
-35.6116	0.224251	0.124631	0.154651	0.0603565	-0.027917	-0.0264247	-0.437139					0.0103442	0.201849	0.0762916
-35.5133	0.228586	0.123497	0.137437	0.0634091	-0.0208436	-0.0261804	-0.44941					0.00807094	0.204606	0.0773339
-35.415	0.23234	0.122131	0.120623	0.065919	-0.0140923	-0.0266618	-0.461217					0.00557721	0.207435	0.0784032
-35.3167	0.235502	0.120662	0.104217	0.0679582	-0.00764187	-0.0279428	-0.472391					0.00290893	0.210249	0.0794668
-35.2184	0.238019	0.119005	0.0882378	0.0694839	-0.00152147	-0.0301161	-0.482923					2.63771e-05	0.21299	0.0805027
-35.1201	0.23992	0.117154	0.0728869	0.0706151	0.00435166	-0.033213	-0.492791					-0.00301083	0.215634	0.0815022
-35.0218	0.241232	0.115083	0.0582264	0.0714409	0.0101489	-0.0371549	-0.502062					-0.00615509	0.218179	0.0824641
-34.9235	0.241925	0.1126	0.0442939	0.072018	0.0158715	-0.041928	-0.510667					-0.00941231	0.22056	0.0833637
-34.8252	0.241969	0.109692	0.0311412	0.0724327	0.0214605	-0.0474349	-0.518657					-0.012771	0.222766	0.0841975
-34.7269	0.241358	0.106392	0.0187991	0.0727811	0.0268631	-0.0536119	-0.525908					-0.0161895	0.224742	0.0849446
-34.6286	0.240062	0.102836	0.00724695	0.0730585	0.0319947	-0.0603318	-0.532416					-0.01965	0.226471	0.0855978
-34.5303	0.238148	0.099103	-0.00368342	0.0732627	0.036857	-0.0675358	-0.538256					-0.0231579	0.227973	0.0861657
-34.432	0.235584	0.0952993	-0.0139996	0.0734551	0.0416368	-0.0753688	-0.543261					-0.0266649	0.229204	0.0866312
-34.3336	0.232348	0.0914626	-0.0237896	0.0736643	0.0463105	-0.083824	-0.54727					-0.0301569	0.23011	0.0869733
-34.2353	0.228483	0.0876162	-0.0331103	0.0738429	0.0509369	-0.0927966	-0.550297					-0.0336178	0.230698	0.0871957
-34.137	0.224112	0.083865	-0.0418326	0.0740522	0.0555991	-0.102257	-0.552297					-0.0369655	0.230994	0.0873076
-34.0387	0.219232	0.0802083	-0.0499687	0.0743487	0.0602836	-0.112154	-0.553233					-0.0401833	0.230991	0.0873064
-33.9404	0.213921	0.0766729	-0.057611	0.0747415	0.0650635	-0.122397	-0.553072					-0.0432403	0.230701	0.0871968
-33.8421	0.208387	0.0733658	-0.0648365	0.0751921	0.0699258	-0.132849	-0.551889					-0.0461005	0.230189	0.0870032
-33.7438	0.20267	0.07026	-0.0716372	0.0756905	0.0748254	-0.1434	-0.549597					-0.0487414	0.229429	0.0867158
-33.6455	0.196823	0.0673957	-0.0780658	0.0762311	0.0797724	-0.153787	-0.546219					-0.0511213	0.22843	0.0863385
-33.5472	0.190828	0.0647024	-0.0840561	0.0768012	0.084745	-0.164007	-0.541796					-0.0532545	0.227199	0.0858731
-33.4489	0.18469	0.0621908	-0.0895605	0.0774416	0.0897025	-0.173985	-0.536115					-0.0550908	0.22567	0.0852951
-33.3506	0.178429	0.0597442	-0.0944822	0.0781821	0.0946256	-0.183611	-0.529293					-0.0566293	0.223867	0.0846138
-33.2523	0.172077	0.0572237	-0.0987778	0.0790409	0.0994121	-0.19285	-0.521442					-0.0579023	0.221809	0.0838361
-33.154	0.16571	0.0546058	-0.102376	0.080092	0.10402	-0.201512	-0.512457					-0.0588455	0.219459	0.0829479
-33.0557	0.159369	0.0518992	-0.10535	0.0812678	0.108347	-0.209491	-0.502357					-0.0594737	0.216803	0.0819437
-32.9574	0.153042	0.0491489	-0.107745	0.0824785	0.112237	-0.216769	-0.491188					-0.0598279	0.213824	0.0808179
-32.8591	0.146795	0.0464197	-0.109563	0.0836431	0.115702	-0.223237	-0.479018					-0.0598941	0.210534	0.0795744
-32.7608	0.140683	0.0437399	-0.11087	0.0846619	0.118788	-0.2289	-0.465838					-0.0596765	0.206932	0.0782131
-32.6625	0.1347	0.0411174	-0.111626	0.0855016	0.121494	-0.233849	-0.451727					-0.0591983	0.20304	0.076742
-32.5642	0.128912	0.038409	-0.111855	0.0861916	0.123928	-0.238164	-0.436775					-0.0584789	0.198907	0.0751797
-32.4659	0.123244	0.0355198	-0.111462	0.0867373	0.126184	-0.241908	-0.420924					-0.0575156	0.194518	0.0735208
-32.3676	0.117675	0.0324213	-0.110419	0.0871455	0.128118	-0.245007	-0.404257					-0.0563319	0.189864	0.071762
-32.2693	0.112202	0.02907	-0.10876	0.0874827	0.129694	-0.247495	-0.386911					-0.0549597	0.184989	0.0699193
-32.171	0.106822	0.0255062	-0.10648	0.0878504	0.130891	-0.249348	-0.368843					-0.0533716	0.179893	0.067993
-32.0727	0.101517	0.0216831	-0.103678	0.0881841	0.131723	-0.25039	-0.350243					-0.0516005	0.174593	0.06599
-31.9744	0.0963044	0.0175854	-0.100307	0.0884349	0.13218	-0.250654	-0.331274					-0.0496758	0.16913	0.063925
-31.876	0.0911744	0.0132134	-0.0962739	0.0885646	0.132279	-0.250142	-0.312008					-0.0475989	0.163514	0.0618024
-31.7777	0.0860823	0.00858154	-0.0915415	0.0886874	0.132011	-0.248865	-0.292369					-0.0453447	0.157741	0.0596206
-31.6794	0.0809742	0.00372504	-0.0861058	0.0888474	0.131383	-0.246833	-0.27239					-0.0429141	0.151832	0.0573873
-31.5811	0.0759042	-0.00128507	-0.0799959	0.0890655	0.130421	-0.244293	-0.252225					-0.0403442	0.1459	0.0551451
-31.4828	0.0708548	-0.00630395	-0.0732742	0.0893424	0.12919	-0.241346	-0.231963					-0.0376428	0.140019	0.0529222
-31.3845	0.0658242	-0.0112595	-0.0660958	0.0896777	0.1276	-0.238033	-0.211743					-0.0348614	0.134239	0.0507374
-31.2862	0.0608197	-0.016072	-0.0586396	0.0900105	0.125711	-0.234309	-0.191592					-0.0320102	0.128584	0.0486001
-31.1879	0.0558321	-0.0206619	-0.0509188	0.090277	0.123593	-0.230104	-0.171637					-0.0290884	0.123083	0.046521
-31.0896	0.0508319	-0.0249569	-0.0430581	0.0904747	0.121341	-0.225495	-0.152065					-0.0261324	0.117814	0.0445296
-30.9913	0.0458303	-0.0289065	-0.0351259	0.0906065	0.11917	-0.22044	-0.132928					-0.0231134	0.112824	0.0426435
-30.893	0.0409259	-0.0324621	-0.0271305	0.0907128	0.117062	-0.214918	-0.114202					-0.0200017	0.108119	0.0408652
-30.7947	0.0361714	-0.0356997	-0.0191489	0.0908667	0.115056	-0.208978	-0.0959644					-0.0168139	0.103748	0.0392132
-30.6964	0.0315895	-0.0386233	-0.0111934	0.0910798	0.113272	-0.202584	-0.0782682					-0.0135326	0.099732	0.0376952
-30.5981	0.0272435	-0.0412889	-0.00330658	0.0913305	0.111763	-0.195593	-0.0612076					-0.0101514	0.0960446	0.0363015
-30.4998	0.0231238	-0.0435812	0.00448899	0.0916024	0.110512	-0.188053	-0.0447232					-0.00666139	0.0926679	0.0350252
-30.4015	0.0193024	-0.0454847	0.0121714	0.09188	0.109459	-0.179964	-0.0289345					-0.00308145	0.0895789	0.0338577
-30.3032	0.0158698	-0.0470448	0.0197193	0.0921063	0.108648	-0.171244	-0.0139171					0.000591064	0.0867324	0.0327818
-30.2049	0.0128481	-0.0482759	0.0271298	0.0922519	0.108178	-0.161874	0.000357556					0.00437368	0.0841036	0.0317882
-30.1066	0.0102619	-0.0492663	0.0343425	0.0921703	0.108115	-0.151961	0.0138331					0.00821356	0.0816853	0.0308742
-30.0083	0.00799766	-0.0500131	0.0413488	0.0919065	0.108525	-0.14167	0.0265974					0.012099	0.0795097	0.0300519
-29.91	0.00602129	-0.0505224	0.0479818	0.0914723	0.109374	-0.131007	0.0387494					0.0160099	0.0775435	0.0293087
-29.8117	0.00439652	-0.0507595	0.0541653	0.0908327	0.110579	-0.119958	0.0503403					0.0199423	0.0757327	0.0286243
-29.7134	0.00311537	-0.0507691	0.0598701	0.0898727	0.112248	-0.108669	0.0612972					0.0238523	0.0740965	0.0280058
-29.6151	0.00227022	-0.0507237	0.065023	0.0885304	0.114422	-0.0971605	0.071534					0.0276994	0.0726268	0.0274504
-29.5168	0.00180528	-0.0508197	0.0696456	0.0866891	0.117124	-0.0852582	0.0813158					0.0315003	0.071319	0.0269561
-29.4184	0.00175818	-0.0511648	0.0737865	0.0843642	0.120202	-0.0730068	0.0906823					0.0352317	0.0701993	0.0265329
-29.3201	0.00221616	-0.0518292	0.07754	0.0815591	0.123737	-0.0604595	0.0995851					0.0389069	0.069326	0.0262028
-29.2218	0.00316132	-0.0528557	0.080994	0.0782878	0.127607	-0.0478032	0.10815					0.0425059	0.0687756	0.0259947
-29.1235	0.00456174	-0.0543024	0.0840255	0.0745818	0.131794	-0.0350647	0.116452					0.0460068	0.0685941	0.0259261
-29.0252	0.00641661	-0.0561673	0.0867369	0.0704107	0.136231	-0.0223183	0.124514					0.0494034	0.0688194	0.0260113
-28.9269	0.00865047	-0.0584868	0.0892506	0.0657493	0.140681	-0.00973376	0.132377					0.0526411	0.069484	0.0262625
-28.8286	0.0111019	-0.0612882	0.0915576	0.0606333	0.145229	0.00249384	0.139985					0.0556732	0.0706456	0.0267015
-28.7303	0.0136735	-0.0644506	0.0936316	0.0550434	0.149722	0.0141697	0.147253					0.0584347	0.0722458	0.0273064
-28.632	0.0162781	-0.0679626	0.0955028	0.0490139	0.153963	0.0251962	0.154212					0.0608862	0.0742369	0.0280589
-28.5337	0.0188306	-0.0717286	0.0970788	0.0425635	0.158005	0.035471	0.160958					0.0630255	0.0765893	0.028948
-28.4354	0.0212496	-0.0757641	0.0984266	0.0356545	0.16179	0.0450121	0.167364					0.064819	0.0792402	0.02995
-28.3371	0.0234772	-0.0799835	0.0995007	0.0282859	0.165245	0.0538192	0.173467					0.0662587	0.0821241	0.03104
-28.2388	0.0253818	-0.0843247	0.100206	0.0204624	0.168415	0.0617704	0.179273					0.067312	0.0852027	0.0322036
-28.1405	0.0269048	-0.0886643	0.100553	0.0122155	0.171266	0.0687992	0.184767					0.0679773	0.0884011	0.0334125
-28.0422	0.0280214	-0.0928873	0.100638	0.00370909	0.17383	0.0749239	0.189923					0.0683083	0.0916469	0.0346393
-27.9439	0.0288018	-0.0969424	0.100436	-0.00503067	0.175983	0.0800048	0.194772					0.0682893	0.0948707	0.0358577
-27.8456	0.02926	-0.100787	0.100112	-0.0139346	0.17775	0.0838912	0.199117					0.0679155	0.0979966	0.0370392
-27.7473	0.0293506	-0.104432	0.099704	-0.0228814	0.17919	0.0864375	0.202901					0.0671813	0.100986	0.0381693
-27.649	0.0290449	-0.107836	0.0991853	-0.0318118	0.180205	0.0877978	0.20604					0.0660893	0.103773	0.0392226
-27.5507	0.0283056	-0.11078	0.0986654	-0.0406154	0.180756	0.0878482	0.208485					0.0646664	0.106262	0.0401634
-27.4524	0.0271227	-0.113044	0.0982046	-0.0491425	0.180725	0.0865205	0.210014					0.0629143	0.108311	0.0409378
-27.3541	0.0255861	-0.114542	0.0977465	-0.0573265	0.180182	0.0839887	0.210584					0.0608884	0.109889	0.041534
-27.2558	0.0236124	-0.11529	0.0973063	-0.0652007	0.179164	0.0802591	0.210179					0.0585758	0.111013	0.0419591
-27.1575	0.0211868	-0.115289	0.0968751	-0.0727303	0.177827	0.075444	0.208724					0.0560055	0.1117	0.0422187
-27.0592	0.0183293	-0.114513	0.0965815	-0.0798524	0.176275	0.0696263	0.20628					0.0532466	0.111982	0.0423251
-26.9608	0.015051	-0.113026	0.0963368	-0.0865209	0.174518	0.0629032	0.202867					0.050304	0.111882	0.0422873
-26.8625	0.0114203	-0.110866	0.0959848	-0.0925919	0.172629	0.0553285	0.19845					0.0471935	0.111395	0.0421033
-26.7642	0.00751496	-0.108096	0.0955115	-0.098129	0.170673	0.0471121	0.193051					0.0439482	0.110577	0.041794
-26.6659	0.00339288	-0.10479	0.0949692	-0.103195	0.168795	0.0384721	0.186783					0.0406324	0.109521	0.041395
-26.5676	-0.000877679	-0.101064	0.0943518	-0.107824	0.167144	0.0295821	0.179726					0.0372912	0.108313	0.0409385
-26.4693	-0.00521235	-0.0970292	0.0938137	-0.111955	0.165672	0.0204995	0.171829					0.0339454	0.106974	0.0404323
-26.371	-0.00955366	-0.092782	0.0933373	-0.11554	0.164487	0.0112546	0.163248					0.0306359	0.105576	0.0399039
-26.2727	-0.0138381	-0.0884283	0.09291	-0.118568	0.163674	0.00185943	0.154102					0.0273873	0.104192	0.0393808
-26.1744	-0.0178985	-0.083984	0.0926207	-0.120968	0.163231	-0.0076208	0.144547					0.0242753	0.102857	0.0388763
-26.0761	-0.0216764	-0.07958	0.0925235	-0.122784	0.163151	-0.017129	0.134645					0.0213071	0.101631	0.038413
-25.9778	-0.0251977	-0.0753112	0.092549	-0.124073	0.163203	-0.02663	0.124459					0.0184284	0.100515	0.0379912
-25.8795	-0.0284613	-0.0712305	0.0926389	-0.124859	0.163518	-0.0358671	0.113957					0.0156708	0.0995327	0.0376198
-25.7812	-0.0314711	-0.0673171	0.0927112	-0.125228	0.163988	-0.0446508	0.103366					0.0130569	0.0986889	0.0373009
-25.6829	-0.0342621	-0.063569	0.0927832	-0.125249	0.164574	-0.0527445	0.0928139					0.0106208	0.0979813	0.0370334
-25.5846	-0.0368098	-0.0599834	0.0928647	-0.124901	0.165305	-0.0601185	0.0824966					0.00840768	0.097415	0.0368194
-25.4863	-0.039079	-0.056695	0.0928868	-0.124253	0.166135	-0.0666672	0.0725155					0.00640611	0.0969718	0.0366519
-25.388	-0.0410439	-0.0538299	0.092732	-0.123377	0.167139	-0.0724053	0.0630132					0.00460392	0.0966611	0.0365345
-25.2897	-0.0428183	-0.0514915	0.0923744	-0.122339	0.168325	-0.0774491	0.054068					0.0029528	0.0964948	0.0364716
-25.1914	-0.0443769	-0.0495969	0.0918003	-0.121093	0.169641	-0.0817396	0.0458328					0.00149529	0.0964101	0.0364396
-25.0931	-0.0457386	-0.0480925	0.0910196	-0.119602	0.170899	-0.0852153	0.0383545					0.00023205	0.0963126	0.0364027
-24.9948	-0.046804	-0.0469677	0.0899432	-0.11797	0.171963	-0.0879754	0.0315971					-0.000887717	0.096145	0.0363394
-24.8965	-0.0475431	-0.0461614	0.0886764	-0.116236	0.172793	-0.0900878	0.0255603					-0.00185694	0.0958929	0.0362441
-24.7982	-0.048038	-0.0456074	0.0873364	-0.114484	0.173412	-0.0914696	0.0202797					-0.00265294	0.0955601	0.0361183
-24.6999	-0.0483067	-0.0451905	0.0859164	-0.112675	0.173699	-0.0921361	0.0157968					-0.00327098	0.095085	0.0359387
-24.6016	-0.048408	-0.0448799	0.0845192	-0.110693	0.17361	-0.0922383	0.0120412					-0.00372122	0.0944536	0.0357001
-24.5033	-0.0484183	-0.044512	0.0831757	-0.108441	0.173042	-0.0918795	0.00882442					-0.00402976	0.0936201	0.0353851
-24.4049	-0.0483726	-0.0440023	0.0817439	-0.105982	0.171942	-0.0910072	0.00616091					-0.00421677	0.0925437	0.0349782
-24.3066	-0.0483348	-0.0432521	0.0801821	-0.103275	0.170243	-0.0895579	0.00393473					-0.00429436	0.0911761	0.0344613
-24.2083	-0.0483299	-0.0422428	0.0785074	-0.100265	0.167963	-0.0874397	0.00204543					-0.00425165	0.0895	0.0338278
-24.11	-0.0484454	-0.0409762	0.0767579	-0.0970064	0.165059	-0.0847334	0.000408692					-0.00413367	0.0875319	0.0330839
-24.0117	-0.0486826	-0.039388	0.0748246	-0.0934834	0.161525	-0.0815259	-0.00103259					-0.00396609	0.0852619	0.032226
-23.9134	-0.0489245	-0.0374029	0.0727077	-0.0896815	0.157577	-0.0778096	-0.00220774					-0.0036773	0.0827362	0.0312714
-23.8151	-0.0491067	-0.0350214	0.0705843	-0.0856452	0.153195	-0.0735678	-0.0030761					-0.00323403	0.0799753	0.0302278
-23.7168	-0.0491934	-0.0323335	0.0685131	-0.0813389	0.148647	-0.0688233	-0.00372008					-0.00260707	0.077066	0.0291282
-23.6185	-0.049116	-0.0293862	0.0664779	-0.0767535	0.143982	-0.063842	-0.00435922					-0.00185669	0.0740539	0.0279898
-23.5202	-0.0488814	-0.0262754	0.0645497	-0.0719173	0.139212	-0.0587714	-0.00509667					-0.00102576	0.0709842	0.0268295
-23.4219	-0.0485345	-0.0229707	0.062713	-0.0668361	0.134389	-0.053565	-0.00590544					-0.000101415	0.0678734	0.0256537
-23.3236	-0.0480959	-0.0194514	0.0610599	-0.0614762	0.129546	-0.0481534	-0.00685456					0.000939159	0.0647422	0.0244702
-23.2253	-0.0475116	-0.0157279	0.0597317	-0.0558531	0.124683	-0.0424132	-0.00793681					0.00213881	0.0616068	0.0232852
-23.127	-0.0467346	-0.0118563	0.0587367	-0.050014	0.119855	-0.0364806	-0.00922782					0.00346834	0.0585212	0.0221189
-23.0287	-0.0457479	-0.00797261	0.0579594	-0.0440485	0.115127	-0.0303982	-0.0107366					0.00488317	0.0555268	0.0209871
-22.9304	-0.0446861	-0.00416174	0.057457	-0.0379649	0.110603	-0.0240725	-0.0124805					0.00638495	0.0526983	0.0199181
-22.8321	-0.0435798	-0.000483829	0.0571233	-0.0318028	0.106444	-0.0175052	-0.0143428					0.00797903	0.050101	0.0189364
-22.7338	-0.042319	0.00298316	0.0569308	-0.0256097	0.102768	-0.0107671	-0.0162316					0.0096792	0.0477816	0.0180598
-22.6355	-0.0408376	0.00611204	0.0569257	-0.0194263	0.099697	-0.00385009	-0.0179893					0.0115188	0.0457823	0.0173041
-22.5372	-0.0390856	0.00882167	0.0569452	-0.0133653	0.097188	0.00334256	-0.0194845					0.0134803	0.0440636	0.0166545
-22.4389	-0.0369308	0.0109985	0.0569409	-0.00753989	0.0952948	0.0106719	-0.0204652					0.0155672	0.0425968	0.0161001
-22.3406	-0.0344621	0.012586	0.0569952	-0.00201219	0.0941152	0.0179825	-0.0207967					0.0177726	0.0414057	0.0156499
-22.2423	-0.0315918	0.0135773	0.0571343	0.00311423	0.0936708	0.02518	-0.0203992					0.0200979	0.0404498	0.0152886
-22.144	-0.0283546	0.0140233	0.0574714	0.0077288	0.0938654	0.0321087	-0.0192662					0.022511	0.0396934	0.0150027
-22.0456	-0.024784	0.013951	0.0578944	0.0118367	0.0946816	0.0388033	-0.0174154					0.0249954	0.0390987	0.0147779
-21.9473	-0.0209571	0.0133149	0.0585079	0.0154103	0.0960741	0.0453327	-0.0147965					0.0275552	0.0386677	0.014615
-21.849	-0.0170329	0.0120634	0.0593766	0.0183453	0.0979339	0.0516746	-0.0114781					0.0301261	0.0384295	0.014525
-21.7507	-0.0130977	0.0102134	0.0603896	0.0206797	0.100194	0.0577717	-0.00737099					0.0326829	0.0383667	0.0145012
-21.6524	-0.00922444	0.00776903	0.0614818	0.0223893	0.102613	0.063526	-0.00244795					0.035158	0.0384429	0.0145301
-21.5541	-0.00546087	0.00476385	0.0626223	0.0235174	0.105077	0.0690801	0.00347207					0.0375817	0.0386666	0.0146146
-21.4558	-0.00177474	0.00125939	0.0637513	0.0239847	0.107541	0.0744504	0.0104683					0.0399544	0.0390738	0.0147685
-21.3575	0.00181488	-0.00272405	0.0649406	0.0237923	0.11004	0.0795472	0.0183835					0.0422563	0.039766	0.0150301
-21.2592	0.00527572	-0.00720996	0.066135	0.0229308	0.11255	0.084284	0.0272218					0.0444554	0.0408095	0.0154245
-21.1609	0.00852956	-0.0121547	0.0671678	0.0213964	0.115034	0.0885464	0.0368588					0.0464825	0.0422529	0.0159701
-21.0626	0.0115182	-0.0174591	0.0680173	0.0191792	0.117398	0.0924944	0.0472082					0.0483366	0.0441471	0.016686
-20.9643	0.0143041	-0.0229391	0.0687991	0.0163207	0.119677	0.0959562	0.0582861					0.0500578	0.046472	0.0175648
-20.866	0.016949	-0.028459	0.0695681	0.0128848	0.121748	0.0987302	0.0701433					0.0516521	0.0491612	0.0185812
-20.7677	0.0193937	-0.0339477	0.0703815	0.00895729	0.123551	0.100806	0.0825665					0.0531012	0.0521921	0.0197268
-20.6694	0.0216092	-0.0393886	0.0712388	0.00458354	0.124817	0.102083	0.0952645					0.0543153	0.0554704	0.0209658
-20.5711	0.0234669	-0.0447333	0.0721273	-0.000174572	0.125511	0.102384	0.107967					0.0552211	0.0589198	0.0222696
-20.4728	0.0248448	-0.0498561	0.0730999	-0.00525537	0.125737	0.101714	0.120563					0.0558353	0.0624979	0.023622
-20.3745	0.0256241	-0.0546924	0.074206	-0.0106082	0.12548	0.100296	0.132816					0.0561602	0.0661532	0.0250036
-20.2762	0.025896	-0.0591722	0.0754933	-0.0161094	0.124669	0.0982539	0.144514					0.0562207	0.0697812	0.0263748
-20.1779	0.0256267	-0.0633239	0.0769913	-0.0217016	0.123247	0.0955806	0.155538					0.055994	0.0733246	0.0277141
-20.0796	0.024903	-0.0671451	0.0785555	-0.0273105	0.1213	0.0922993	0.165805					0.0554867	0.0767353	0.0290032
-19.9813	0.0237536	-0.0706846	0.080248	-0.0329005	0.118782	0.0883695	0.175304					0.054696	0.079992	0.0302341
-19.883	0.0222784	-0.0738991	0.0820068	-0.0384628	0.115851	0.0838694	0.183968					0.0536589	0.0830722	0.0313983
-19.7847	0.0206558	-0.0768208	0.0837609	-0.0438901	0.11262	0.0787705	0.19165					0.0523923	0.085918	0.032474
-19.6864	0.0189016	-0.0794797	0.0854595	-0.0491707	0.109095	0.0729462	0.198181					0.0508475	0.0884756	0.0334406
-19.5881	0.0171051	-0.0817682	0.0870651	-0.0542969	0.105437	0.0664236	0.203537					0.0490719	0.0907172	0.0342879
-19.4897	0.0152361	-0.0836308	0.0885817	-0.0593489	0.101805	0.0590565	0.207705					0.0470578	0.0926495	0.0350182
-19.3914	0.0132623	-0.0850473	0.090032	-0.0642255	0.0982871	0.0510287	0.210703					0.044863	0.0942724	0.0356316
-19.2931	0.0112498	-0.0860488	0.0913749	-0.0689576	0.0949583	0.0422639	0.212687					0.0425039	0.0956395	0.0361483
-19.1948	0.00921157	-0.086484	0.0926648	-0.0735844	0.0918153	0.0326966	0.213656					0.0399966	0.0967439	0.0365658
-19.0965	0.00719383	-0.0863493	0.0939934	-0.0780857	0.0889064	0.0224003	0.213712					0.0373958	0.0976362	0.036903
-18.9982	0.00517032	-0.0858008	0.0953918	-0.0824046	0.0863346	0.0114877	0.212969					0.0347355	0.0983974	0.0371907
-18.8999	0.00304142	-0.0850096	0.0968264	-0.0865515	0.084136	0.000162287	0.211284					0.0319841	0.0990392	0.0374333
-18.8016	0.000807027	-0.0840528	0.0981202	-0.0904924	0.0824595	-0.0114632	0.208655					0.0291476	0.0995725	0.0376349
-18.7033	-0.0014473	-0.0829894	0.0992398	-0.0942987	0.0812275	-0.0233138	0.205326					0.0262491	0.100076	0.0378253
-18.605	-0.00377801	-0.0817445	0.100171	-0.0979718	0.080646	-0.0351697	0.201537					0.0233844	0.100612	0.0380277
-18.5067	-0.0060578	-0.0802479	0.100905	-0.101532	0.080612	-0.0467959	0.197413					0.0206138	0.101173	0.0382399
-18.4084	-0.00811303	-0.0785404	0.101421	-0.104988	0.0811241	-0.0583016	0.192979					0.0179401	0.101778	0.0384685
-18.3101	-0.00985839	-0.0766548	0.101626	-0.108359	0.0822273	-0.0698201	0.188317					0.015354	0.102464	0.0387277
-18.2118	-0.0112803	-0.0746118	0.10138	-0.111691	0.0839993	-0.0814789	0.183566					0.0128404	0.103291	0.0390405
-18.1135	-0.0124001	-0.0723974	0.100583	-0.115037	0.0864743	-0.0931267	0.178803					0.0104142	0.104271	0.0394108
-18.0152	-0.013249	-0.070004	0.0992861	-0.118417	0.0896812	-0.104725	0.174156					0.00810403	0.10545	0.0398562
-17.9169	-0.0137597	-0.0673871	0.0974847	-0.121851	0.0936947	-0.116181	0.169665					0.00595231	0.106835	0.0403799
-17.8186	-0.013969	-0.0645414	0.095153	-0.12529	0.0982932	-0.127654	0.165348					0.00390565	0.108432	0.0409835
-17.7203	-0.0140482	-0.0613712	0.0923173	-0.128754	0.103248	-0.139126	0.161272					0.00193387	0.110235	0.041665
-17.622	-0.0140082	-0.0578394	0.0891023	-0.132249	0.108569	-0.150474	0.157397					7.10029e-05	0.112233	0.0424202
-17.5237	-0.0139139	-0.0540022	0.0856048	-0.135768	0.114251	-0.161581	0.153684					-0.00167511	0.114413	0.0432439
-17.4254	-0.0137099	-0.0499206	0.0818236	-0.139223	0.120173	-0.172151	0.149912					-0.00329954	0.116639	0.0440855
-17.3271	-0.013395	-0.0456054	0.0777295	-0.142595	0.126237	-0.182394	0.145877					-0.00487808	0.118895	0.0449379
-17.2288	-0.0130371	-0.0410309	0.0733214	-0.145794	0.132266	-0.192097	0.141549					-0.00640331	0.121084	0.0457656
-17.1305	-0.0125135	-0.0363468	0.0685303	-0.148764	0.138184	-0.201049	0.13688					-0.00786838	0.123128	0.0465378
-17.0321	-0.0118012	-0.0315428	0.0633318	-0.151472	0.143977	-0.209399	0.131784					-0.00930328	0.12503	0.0472568
-16.9338	-0.0108259	-0.0265491	0.0576597	-0.153966	0.149645	-0.217425	0.126243					-0.0107455	0.126857	0.0479474
-16.8355	-0.00948822	-0.0212127	0.0515136	-0.156205	0.155133	-0.225194	0.120343					-0.0121587	0.12863	0.0486176
-16.7372	-0.00782044	-0.0155185	0.0450384	-0.158229	0.16031	-0.232739	0.113926					-0.0135761	0.130342	0.0492646
-16.6389	-0.00587145	-0.00939539	0.0382987	-0.159947	0.165253	-0.24007	0.106763					-0.0149956	0.131984	0.0498853
-16.5406	-0.00362166	-0.00283773	0.0313443	-0.161385	0.169906	-0.247405	0.0987048					-0.0164706	0.133614	0.0505015
-16.4423	-0.00114487	0.0040523	0.0241477	-0.162523	0.174302	-0.254802	0.0896752					-0.0180419	0.135269	0.0511267
-16.344	0.00150007	0.0112377	0.0167774	-0.163369	0.178284	-0.26215	0.0797177					-0.0197145	0.136926	0.0517532
-16.2457	0.0042967	0.0187513	0.00934248	-0.163903	0.181754	-0.269426	0.0688721					-0.0214732	0.138596	0.0523844
-16.1474	0.00721002	0.0265474	0.00195281	-0.164115	0.184671	-0.27649	0.0570846					-0.0233055	0.140255	0.0530115
-16.0491	0.0102562	0.0345262	-0.00531699	-0.163885	0.186991	-0.283589	0.044364					-0.0252362	0.141967	0.0536584
-15.9508	0.0133871	0.0425745	-0.0124446	-0.163173	0.188588	-0.290613	0.0306409					-0.0272914	0.143685	0.054308
-15.8525	0.0165008	0.0506322	-0.0194492	-0.161973	0.189472	-0.297415	0.0158332					-0.0294856	0.145391	0.0549527
-15.7542	0.0195778	0.0586398	-0.0262703	-0.160324	0.189853	-0.303809	7.25265e-06					-0.0317608	0.147114	0.055604
-15.6559	0.0226678	0.066539	-0.0328872	-0.158218	0.190072	-0.309754	-0.016701					-0.0340402	0.148948	0.056297
-15.5576	0.0258495	0.0742853	-0.0393347	-0.155661	0.19008	-0.315319	-0.0341639					-0.0363234	0.150927	0.057045
-15.4593	0.0291599	0.0818076	-0.0456249	-0.152661	0.18979	-0.320552	-0.0522188					-0.0386142	0.153061	0.0578515
-15.361	0.0325883	0.0890806	-0.0516908	-0.149288	0.189283	-0.325699	-0.0705818					-0.040901	0.155442	0.0587516
-15.2627	0.0361615	0.0960544	-0.0575776	-0.145612	0.188695	-0.330681	-0.0890431					-0.0431432	0.158072	0.0597456
-15.1644	0.0399164	0.102758	-0.0633425	-0.141694	0.188179	-0.335538	-0.107573					-0.0453277	0.160992	0.0608492
-15.0661	0.0437288	0.109176	-0.0688847	-0.137577	0.187846	-0.340342	-0.126036					-0.0474413	0.16421	0.0620654
-14.9678	0.047601	0.115341	-0.0741375	-0.133312	0.187758	-0.344926	-0.144289					-0.0494235	0.167667	0.0633722
-14.8695	0.0514597	0.12127	-0.0790865	-0.128829	0.187864	-0.349076	-0.162428					-0.0512608	0.171274	0.0647353
-14.7712	0.0551938	0.126867	-0.0837052	-0.124198	0.188204	-0.35283	-0.180326					-0.0529706	0.174994	0.0661414
-14.6729	0.0588323	0.132094	-0.087908	-0.119438	0.188772	-0.356075	-0.19777					-0.054499	0.178746	0.0675595
-14.5745	0.0624248	0.136814	-0.0917923	-0.114611	0.189512	-0.358799	-0.214553					-0.0558577	0.182452	0.0689602
-14.4762	0.0660668	0.140911	-0.0954124	-0.109701	0.190389	-0.360844	-0.230599					-0.0570272	0.186021	0.0703093
-14.3779	0.0697971	0.14442	-0.0986722	-0.104776	0.191441	-0.362375	-0.245903					-0.0580098	0.189481	0.071617
-14.2796	0.0736064	0.147411	-0.101611	-0.0998399	0.192746	-0.363323	-0.26052					-0.0587902	0.192826	0.0728813
-14.1813	0.0774802	0.149798	-0.104239	-0.0948952	0.194343	-0.363541	-0.274544					-0.0593711	0.196012	0.0740855
-14.083	0.081462	0.151555	-0.106568	-0.0899486	0.196186	-0.363132	-0.28791					-0.0597653	0.199032	0.0752269
-13.9847	0.0855847	0.15284	-0.108634	-0.0850939	0.19835	-0.362019	-0.300557					-0.0599329	0.201891	0.0763075
-13.8864	0.0898935	0.153796	-0.110456	-0.0803705	0.200906	-0.360294	-0.312438					-0.0598519	0.204629	0.0773423
-13.7881	0.0944141	0.154445	-0.111985	-0.0758175	0.203735	-0.358272	-0.323482					-0.0595661	0.20727	0.0783408
-13.6898	0.099131	0.154842	-0.113212	-0.0714419	0.206646	-0.356049	-0.333739					-0.0591176	0.209801	0.0792973
-13.5915	0.104108	0.154966	-0.114154	-0.06726	0.209379	-0.353645	-0.343252					-0.0585512	0.212178	0.0801958
-13.4932	0.109266	0.154847	-0.11484	-0.0632661	0.211996	-0.351012	-0.352095					-0.057872	0.214405	0.0810373
-13.3949	0.114576	0.154558	-0.115281	-0.0594165	0.214467	-0.348085	-0.360461					-0.0570918	0.216502	0.08183
-13.2966	0.120045	0.154123	-0.115465	-0.0557026	0.216741	-0.344748	-0.368435					-0.0562059	0.218455	0.0825682
-13.1983	0.12562	0.153566	-0.11526	-0.0521427	0.218585	-0.340961	-0.376133					-0.0552465	0.220231	0.0832394
-13.1	0.131334	0.152784	-0.114575	-0.0486826	0.219832	-0.336829	-0.383655					-0.0542559	0.221828	0.0838432
-13.0017	0.137143	0.151816	-0.113467	-0.0452953	0.220406	-0.332383	-0.391076					-0.0532651	0.223262	0.0843851
-12.9034	0.142995	0.150589	-0.112006	-0.0419293	0.220174	-0.327638	-0.39849					-0.0523293	0.224524	0.084862
-12.8051	0.148909	0.149071	-0.110091	-0.0386464	0.219034	-0.322671	-0.405821					-0.0514594	0.225596	0.0852674
-12.7068	0.154973	0.147292	-0.107699	-0.0354107	0.216944	-0.317343	-0.413199					-0.0506347	0.226502	0.0856097
-12.6085	0.161134	0.145301	-0.105038	-0.0321883	0.213975	-0.311703	-0.420727					-0.0498923	0.227306	0.0859135
-12.5102	0.167322	0.1432	-0.102023	-0.0290073	0.210122	-0.305788	-0.428458					-0.0492334	0.228041	0.0861914
-12.4119	0.173337	0.141057	-0.0986249	-0.0258878	0.205437	-0.299641	-0.436297					-0.0486599	0.228695	0.0864385
-12.3136	0.179176	0.138854	-0.094944	-0.0227989	0.199922	-0.292981	-0.444155					-0.0481324	0.229217	0.0866357
-12.2153	0.184876	0.136543	-0.0909949	-0.0197416	0.193603	-0.285924	-0.451945					-0.0476548	0.229622	0.0867891
-12.1169	0.190346	0.134171	-0.0868204	-0.0167587	0.18655	-0.278657	-0.459535					-0.0472435	0.229923	0.0869026
-12.0186	0.195527	0.131827	-0.0824214	-0.0139368	0.178782	-0.271093	-0.466926					-0.0468917	0.230118	0.0869763
-11.9203	0.200388	0.129496	-0.0776993	-0.0112509	0.170235	-0.263145	-0.474225					-0.0466001	0.230218	0.0870142
-11.822	0.204915	0.127037	-0.0726459	-0.00875667	0.160992	-0.254805	-0.481367					-0.0463758	0.230213	0.0870124
-11.7237	0.209165	0.124524	-0.0672753	-0.00649186	0.151255	-0.245979	-0.488337					-0.0461628	0.230144	0.0869863
-11.6254	0.213221	0.121903	-0.0616644	-0.00447692	0.141139	-0.236669	-0.495073					-0.0459457	0.230031	0.0869435
-11.5271	0.216965	0.119182	-0.0558323	-0.00275706	0.130853	-0.226774	-0.501519					-0.0456975	0.229862	0.0868797
-11.4288	0.220384	0.116433	-0.0497316	-0.0013595	0.120436	-0.21631	-0.50756					-0.045387	0.229625	0.0867901
-11.3305	0.223406	0.113642	-0.0433993	-0.000346888	0.110025	-0.205433	-0.513118					-0.0450322	0.229319	0.0866746
-11.2322	0.225943	0.110823	-0.0369448	0.00028671	0.099709	-0.194137	-0.518187					-0.044644	0.22894	0.0865312
-11.1339	0.228016	0.108061	-0.0304392	0.000605349	0.0896366	-0.182428	-0.522669					-0.0441739	0.228484	0.0863587
-11.0356	0.229573	0.105465	-0.0238983	0.000495286	0.0800429	-0.17018	-0.526368					-0.043553	0.227895	0.0861361
-10.9373	0.230697	0.103068	-0.017317	-0.000122015	0.0710387	-0.157441	-0.529246					-0.0427604	0.227182	0.0858666
-10.839	0.231415	0.100911	-0.0107205	-0.0012799	0.0628531	-0.144435	-0.531222					-0.0417826	0.22635	0.0855523
-10.7407	0.231734	0.0990113	-0.00426778	-0.00302325	0.0555828	-0.131266	-0.532222					-0.040636	0.225374	0.0851832
-10.6424	0.231646	0.0973627	0.00191105	-0.00537683	0.0491783	-0.118051	-0.53221					-0.0393628	0.224222	0.0847478
-10.5441	0.231246	0.0960116	0.00793155	-0.0083789	0.0437074	-0.104846	-0.531125					-0.0379219	0.222889	0.084244
-10.4458	0.230629	0.0950035	0.0138017	-0.0119898	0.0391456	-0.0917016	-0.529106					-0.0363168	0.221428	0.0836919
-10.3475	0.229962	0.0943231	0.0194417	-0.0161782	0.0354734	-0.0786204	-0.526225					-0.0345463	0.219876	0.0831052
-10.2492	0.229195	0.0940207	0.0249209	-0.0209547	0.0326605	-0.0658472	-0.522498					-0.0326434	0.218233	0.0824842
-10.1509	0.228241	0.094043	0.0302283	-0.0263281	0.0306526	-0.0535136	-0.517975					-0.0306646	0.216486	0.0818241
-10.0526	0.227172	0.0944468	0.0353105	-0.0322313	0.0294063	-0.0416112	-0.512645					-0.0285931	0.21464	0.0811262
-9.95426	0.226011	0.0951359	0.04011	-0.0385795	0.0289183	-0.0301354	-0.506566					-0.0264437	0.212699	0.0803928
-9.85596	0.224741	0.0959778	0.0445345	-0.0453844	0.029165	-0.0192297	-0.499623					-0.0242599	0.210607	0.079602
-9.75765	0.223319	0.0971023	0.0485457	-0.0525416	0.0300238	-0.00889946	-0.491866					-0.0220453	0.208371	0.0787567
-9.65935	0.22168	0.0984552	0.0521233	-0.05997	0.0314125	0.000956161	-0.483363					-0.0198151	0.205991	0.0778575
-9.56104	0.219726	0.100152	0.0554034	-0.0676239	0.0332407	0.0102583	-0.474189					-0.017576	0.20349	0.0769118
-9.46274	0.217489	0.102271	0.0584127	-0.0754453	0.0352817	0.0188483	-0.464371					-0.0153589	0.200875	0.0759234
-9.36444	0.214963	0.104669	0.0610132	-0.0834104	0.0373901	0.0266493	-0.453991					-0.0132452	0.198146	0.0748921
-9.26613	0.212229	0.107312	0.0632375	-0.0914623	0.0394001	0.0336433	-0.442974					-0.0112306	0.195283	0.0738102
-9.16783	0.209417	0.11022	0.0650967	-0.0995471	0.0411554	0.0396314	-0.431335					-0.00933723	0.1923	0.0726825
-9.06952	0.206534	0.113382	0.0665602	-0.10765	0.042685	0.0445993	-0.4192					-0.0075842	0.189234	0.0715238
-8.97122	0.203586	0.116742	0.067615	-0.115647	0.0437376	0.0483649	-0.406831					-0.00606178	0.186137	0.070353
-8.87292	0.200539	0.120253	0.0682677	-0.123448	0.0441328	0.0509573	-0.394243					-0.0047916	0.182986	0.0691622
-8.77461	0.197415	0.123966	0.0686043	-0.131038	0.0437175	0.052646	-0.381535					-0.00374643	0.17983	0.0679693
-8.67631	0.194198	0.127887	0.0687878	-0.138313	0.0425766	0.0534454	-0.368781					-0.00288562	0.176692	0.0667833
-8.578	0.190803	0.131971	0.0689296	-0.14524	0.0408455	0.0534411	-0.355911					-0.00216582	0.173548	0.065595
-8.4797	0.187081	0.136154	0.0689519	-0.151786	0.0384158	0.0527135	-0.342964					-0.00163346	0.170374	0.0643953
-8.3814	0.182955	0.140393	0.0687974	-0.157973	0.0353492	0.0512132	-0.329767					-0.00129029	0.167109	0.0631614
-8.28309	0.17838	0.144702	0.0684535	-0.163784	0.0316441	0.048906	-0.316348					-0.00114953	0.163763	0.0618967
-8.18479	0.173357	0.149054	0.0678656	-0.169151	0.027334	0.0459351	-0.302753					-0.00119407	0.160354	0.0606081
-8.08649	0.167883	0.153495	0.067098	-0.174039	0.0225771	0.0424748	-0.28898					-0.00135584	0.156911	0.0593067
-7.98818	0.162018	0.157923	0.0662588	-0.178466	0.0173674	0.0385719	-0.275191					-0.00164532	0.153498	0.0580166
-7.88988	0.155772	0.162414	0.0654178	-0.182413	0.0118649	0.0341325	-0.261394					-0.00202929	0.150143	0.0567488
-7.79157	0.149168	0.167037	0.0645826	-0.185857	0.006259	0.0293086	-0.247596					-0.00244262	0.146885	0.0555173
-7.69327	0.142274	0.17175	0.0637497	-0.188886	0.000630151	0.0240419	-0.233827					-0.00289521	0.143764	0.0543377
-7.59497	0.135128	0.176521	0.0629031	-0.191483	-0.00501383	0.0181157	-0.220055					-0.00341188	0.140783	0.0532108
-7.49666	0.127761	0.181255	0.0619335	-0.193643	-0.0105496	0.0115781	-0.206343					-0.00400116	0.137955	0.052142
-7.39836	0.120292	0.185812	0.0608255	-0.195366	-0.0158017	0.00450139	-0.192738					-0.00463933	0.135294	0.0511362
-7.30005	0.112768	0.190263	0.0597429	-0.196642	-0.0205808	-0.00305849	-0.179218					-0.00524645	0.132834	0.0502065
-7.20175	0.10521	0.194627	0.0587003	-0.197508	-0.0247238	-0.011018	-0.165899					-0.00580182	0.130616	0.0493682
-7.10345	0.0975558	0.198842	0.0577558	-0.198006	-0.0280865	-0.0191875	-0.152772					-0.00627107	0.128629	0.0486173
-7.00514	0.0898151	0.202745	0.0569544	-0.19816	-0.0306622	-0.0275355	-0.139766					-0.00665834	0.126833	0.0479383
-6.90684	0.0820002	0.206382	0.056282	-0.197994	-0.0322264	-0.0358562	-0.126744					-0.00687953	0.125211	0.0473251
-6.80853	0.0740844	0.209783	0.055725	-0.197476	-0.0326271	-0.0441856	-0.113763					-0.00692273	0.123764	0.0467784
-6.71023	0.0660281	0.212797	0.0552607	-0.196575	-0.0319334	-0.0525821	-0.100764					-0.00682416	0.122445	0.04628
-6.61193	0.0578766	0.215475	0.0548052	-0.195263	-0.0302333	-0.0609909	-0.0878414					-0.00659596	0.121277	0.0458382
-6.51362	0.0497996	0.217911	0.0543007	-0.193546	-0.027678	-0.0696366	-0.0751254					-0.00628214	0.120331	0.0454807
-6.41532	0.0419843	0.220075	0.053816	-0.191442	-0.0242214	-0.0785685	-0.0626614					-0.00585982	0.119635	0.0452178
-6.31701	0.0344785	0.221896	0.053377	-0.188912	-0.0198913	-0.0876184	-0.0505714					-0.00532018	0.119161	0.0450387
-6.21871	0.0273193	0.223415	0.0531836	-0.185979	-0.0147133	-0.0967376	-0.0388073					-0.00461699	0.118929	0.044951
-6.12041	0.0205472	0.224599	0.0532616	-0.182722	-0.00860654	-0.106062	-0.0273495					-0.00376176	0.118962	0.0449632
-6.0221	0.014279	0.225426	0.0536146	-0.179123	-0.00177333	-0.115634	-0.0163165					-0.00278951	0.119264	0.0450774
-5.9238	0.00846986	0.225947	0.0541789	-0.175173	0.00579661	-0.125387	-0.00565049					-0.00168832	0.119829	0.045291
-5.82549	0.00315149	0.226128	0.0549401	-0.170936	0.013832	-0.135244	0.00465095					-0.000496724	0.120643	0.0455988
-5.72719	-0.00163391	0.226009	0.0560002	-0.166377	0.0222051	-0.145263	0.0144515					0.000770147	0.121713	0.0460034
-5.62889	-0.00595524	0.225552	0.057474	-0.161436	0.0308385	-0.155322	0.0237511					0.00212893	0.122988	0.0464851
-5.53058	-0.00986569	0.224745	0.059366	-0.156183	0.0395649	-0.16518	0.0325562					0.00357194	0.12441	0.0470227
-5.43228	-0.0133495	0.223547	0.0616701	-0.150645	0.0482585	-0.17471	0.0409606					0.00510443	0.125923	0.0475945
-5.33397	-0.0165406	0.222108	0.0643983	-0.144857	0.056869	-0.183937	0.0488521					0.00669883	0.127546	0.0482078
-5.23567	-0.0194015	0.220434	0.0675203	-0.138819	0.0652978	-0.19278	0.0561606					0.00834456	0.129224	0.048842
-5.13737	-0.021949	0.21853	0.0710022	-0.132522	0.0734475	-0.20116	0.0628723					0.0100316	0.130903	0.0494767
-5.03906	-0.0241292	0.216439	0.0747503	-0.125972	0.0811668	-0.20908	0.0688456					0.0117171	0.132539	0.050095
-4.94076	-0.0259465	0.214321	0.0787013	-0.119223	0.0883886	-0.216595	0.0740235					0.0133813	0.134146	0.0507026
-4.84245	-0.0274305	0.21208	0.0828918	-0.112336	0.0949498	-0.223813	0.0784228					0.0149664	0.135705	0.0512916
-4.74415	-0.0284666	0.209682	0.0873306	-0.105358	0.100679	-0.230656	0.0820351					0.0164638	0.137152	0.0518385
-4.64585	-0.0289827	0.207238	0.0919105	-0.0983798	0.105748	-0.237053	0.0848656					0.0179066	0.138486	0.0523426
-4.54754	-0.028943	0.204606	0.0965246	-0.0915402	0.110163	-0.242889	0.0870045					0.0192751	0.139641	0.0527795
-4.44924	-0.028447	0.201651	0.101189	-0.0848099	0.114028	-0.247851	0.088418					0.0205968	0.140502	0.0531047
-4.35093	-0.0275443	0.198436	0.105918	-0.0781584	0.117377	-0.251872	0.0891937					0.0219071	0.141055	0.0533138
-4.25263	-0.026251	0.195055	0.110677	-0.071635	0.120313	-0.254968	0.0893964					0.0232266	0.141328	0.0534171
-4.15433	-0.0246053	0.191434	0.115306	-0.0652809	0.122944	-0.256988	0.0890051					0.0245449	0.141256	0.0533896
-4.05602	-0.0225979	0.18759	0.119804	-0.0590574	0.125106	-0.257835	0.0880343					0.0258635	0.140783	0.0532111
-3.95772	-0.0203173	0.183545	0.124104	-0.0530523	0.126965	-0.2574	0.0865993					0.0272064	0.139904	0.0528786
-3.85941	-0.0177416	0.17933	0.128198	-0.0473182	0.128517	-0.255739	0.0847136					0.0285658	0.138632	0.0523978
-3.76111	-0.0149565	0.174926	0.132036	-0.0418234	0.129882	-0.252843	0.0824334					0.0299506	0.136967	0.0517687
-3.66281	-0.0119799	0.170282	0.135422	-0.0366559	0.131002	-0.248611	0.0797429					0.0313146	0.134847	0.0509674
-3.5645	-0.00873379	0.165455	0.138242	-0.0318398	0.131916	-0.243216	0.0765728					0.0326279	0.132311	0.0500089
-3.4662	-0.00508178	0.160477	0.140538	-0.0273575	0.132806	-0.236761	0.0729258					0.0339351	0.12941	0.0489123
-3.36789	-0.00100698	0.155368	0.142325	-0.0231904	0.133788	-0.229362	0.0687788					0.0352429	0.126195	0.0476973
-3.26959	0.00352859	0.149991	0.143679	-0.0192723	0.13478	-0.221068	0.064243					0.0365545	0.12267	0.0463648
-3.17129	0.00856477	0.14436	0.144507	-0.0156394	0.135839	-0.211974	0.0594505					0.0378725	0.118875	0.0449306
-3.07298	0.0141243	0.138515	0.144846	-0.012334	0.13701	-0.202186	0.0544721					0.0392069	0.114877	0.0434192
-2.97468	0.020127	0.132518	0.144809	-0.00936138	0.13834	-0.191802	0.04947					0.0405858	0.110755	0.0418613
-2.87637	0.0265557	0.126303	0.14449	-0.00669537	0.139769	-0.180781	0.0445915					0.0420333	0.106515	0.0402588
-2.77807	0.0334134	0.119988	0.143856	-0.00434852	0.141367	-0.169198	0.0397136					0.0435416	0.102222	0.0386363
-2.67977	0.0405973	0.113564	0.14289	-0.00235944	0.143269	-0.157107	0.0348249					0.0450971	0.0979456	0.03702
-2.58146	0.0480514	0.107027	0.141737	-0.000728559	0.145353	-0.144589	0.0299519					0.046686	0.0937528	0.0354352
-2.48316	0.0557082	0.100495	0.140531	0.000608416	0.147577	-0.131815	0.025226					0.0483329	0.0897537	0.0339237
-2.38485	0.0635329	0.0941382	0.139347	0.00158653	0.149903	-0.119066	0.0207504					0.0500274	0.0860876	0.0325381
-2.28655	0.0714454	0.0879386	0.13811	0.00214152	0.152205	-0.106474	0.016444					0.0516872	0.0827984	0.0312949
-2.18825	0.0793821	0.0818658	0.136841	0.00231974	0.154277	-0.0940968	0.0122946					0.0532691	0.079891	0.0301959
-2.08994	0.0873104	0.0759412	0.135509	0.00219137	0.156015	-0.082257	0.00825996					0.05471	0.0774416	0.0292702
-1.99164	0.0951795	0.0702126	0.134111	0.00173749	0.157444	-0.0710178	0.00440455					0.0560101	0.0754692	0.0285247
-1.89333	0.10299	0.0646306	0.132617	0.001012	0.158431	-0.0604757	0.000765192					0.0571386	0.0739469	0.0279493
-1.79503	0.110659	0.0591742	0.131052	6.77399e-05	0.158931	-0.0506589	-0.00270445					0.0580743	0.0728461	0.0275332
-1.69673	0.118215	0.0539162	0.129423	-0.00108238	0.158901	-0.0415423	-0.00605283					0.0588252	0.0721328	0.0272637
-1.59842	0.125577	0.0487882	0.12786	-0.00242733	0.158387	-0.0331843	-0.00904899					0.0594217	0.0717704	0.0271267
-1.50012	0.132635	0.0436932	0.126426	-0.00393765	0.157397	-0.0254615	-0.0116563					0.0598709	0.0716804	0.0270926
-1.40181	0.139216	0.0386825	0.125023	-0.00557837	0.155897	-0.0183533	-0.013813					0.0601534	0.0717553	0.027121
-1.30351	0.145293	0.0338883	0.123668	-0.00737208	0.153895	-0.0118336	-0.0154546					0.0602977	0.071931	0.0271874
-1.20521	0.150874	0.0293933	0.122192	-0.00938761	0.151352	-0.00585296	-0.016679					0.0602703	0.072149	0.0272698
-1.1069	0.155804	0.0251808	0.120686	-0.0115611	0.148109	-0.000344104	-0.0175212					0.0600505	0.0723174	0.0273334
-1.0086	0.15997	0.0212708	0.119078	-0.0138462	0.144176	0.00480243	-0.0179182					0.0596475	0.0723485	0.0273452
-0.910295	0.163386	0.0175898	0.117344	-0.0162481	0.139627	0.00967672	-0.0178659					0.0590729	0.0722293	0.0273001
-0.811991	0.166044	0.014158	0.11543	-0.0187055	0.134593	0.0141919	-0.01753					0.0583117	0.0719795	0.0272057
-0.713687	0.167978	0.0109255	0.113246	-0.021169	0.128989	0.0185166	-0.0167944					0.0573844	0.0715351	0.0270377
-0.615383	0.169242	0.0079808	0.110734	-0.0235911	0.122857	0.0227472	-0.0155696					0.0563429	0.0708693	0.0267861
-0.517079	0.169763	0.00529279	0.107781	-0.025858	0.116287	0.0268751	-0.0139471					0.0551706	0.0699651	0.0264443
-0.418775	0.169516	0.00282778	0.104365	-0.0279409	0.109385	0.0309999	-0.0121326					0.05386	0.0688512	0.0260233
-0.320471	0.16853	0.000459065	0.100366	-0.0297717	0.102122	0.0352733	-0.010135					0.0524062	0.0675205	0.0255203
-0.222167	0.166799	-0.00181143	0.0957817	-0.0313205	0.0945346	0.039843	-0.00790192					0.0508464	0.0659757	0.0249365
-0.123863	0.164381	-0.00398064	0.0906334	-0.0326224	0.086787	0.0447932	-0.00545701					0.0492193	0.064283	0.0242967
-0.0255591	0.16127	-0.00601639	0.0850756	-0.0337342	0.0789575	0.0503118	-0.00276399					0.0475858	0.0624986	0.0236223
0.0727449	0.157491	-0.00797501	0.0791254	-0.0345992	0.071182	0.0564301	7.96819e-05					0.045962	0.0606968	0.0229412
0.171049	0.15309	-0.00972156	0.0728586	-0.0352662	0.0636176	0.0630782	0.00299933					0.0443795	0.058957	0.0222837
0.269353	0.148135	-0.0112403	0.0662663	-0.0357912	0.0563456	0.0703346	0.00613325					0.0428833	0.0573573	0.021679
0.367657	0.142646	-0.012595	0.0594512	-0.0361357	0.049453	0.0780224	0.00946338					0.0414721	0.0559716	0.0211553
0.465961	0.136644	-0.0136166	0.0524954	-0.0362588	0.0430272	0.086075	0.0128458					0.0401731	0.0548445	0.0207293
0.564265	0.130227	-0.0141732	0.0454166	-0.0362351	0.0370333	0.0944876	0.0162837					0.0390057	0.0540503	0.0204291
0.662569	0.123455	-0.0142512	0.0383196	-0.0360597	0.0315464	0.103357	0.0196574					0.0380035	0.0536754	0.0202874
0.760873	0.116322	-0.0140158	0.0311836	-0.0357477	0.0265077	0.11266	0.0228889					0.0371141	0.0537909	0.0203311
0.859177	0.108805	-0.0135338	0.0240796	-0.0352786	0.0220488	0.122421	0.0261157					0.0363797	0.0544279	0.0205718
0.957481	0.100973	-0.0127894	0.0169335	-0.0347325	0.0183381	0.132569	0.0292504					0.0357917	0.0556151	0.0210205
1.05578	0.0929655	-0.0118325	0.0098217	-0.0341016	0.0153002	0.143036	0.0322079					0.0353424	0.0573574	0.0216791
1.15409	0.0847472	-0.0106698	0.00270527	-0.0333411	0.0129774	0.153815	0.0349628					0.0350282	0.0596131	0.0225316
1.25239	0.0763906	-0.00932339	-0.00442421	-0.0325297	0.0113718	0.164949	0.0375853					0.0348599	0.0623857	0.0235796
1.3507	0.0678845	-0.00782098	-0.0113995	-0.0316404	0.0105615	0.176296	0.0401556					0.0348624	0.0655712	0.0247836
1.449	0.0592305	-0.00622971	-0.0181906	-0.0307179	0.0104459	0.187667	0.0426297					0.0349764	0.069079	0.0261094
1.5473	0.050578	-0.00450735	-0.024718	-0.0297896	0.0109738	0.198977	0.0450906					0.0352291	0.0728349	0.027529
1.64561	0.0419804	-0.00267468	-0.030895	-0.0289213	0.0121082	0.210272	0.0476939					0.035652	0.0768104	0.0290316
1.74391	0.0334406	-0.000642069	-0.0366274	-0.028214	0.0139521	0.221581	0.0504744					0.0362807	0.080961	0.0306004
1.84222	0.0250287	0.00154276	-0.0418693	-0.0276456	0.0165817	0.232769	0.0533474					0.0371079	0.085197	0.0322014
1.94052	0.0167526	0.00384301	-0.0466899	-0.0271835	0.0199759	0.243636	0.0563839					0.0381025	0.0894334	0.0338026
2.03882	0.00870897	0.00617059	-0.0512475	-0.026797	0.0240994	0.254216	0.0596052					0.0392509	0.0936814	0.0354082
2.13713	0.000940849	0.00856873	-0.055597	-0.026524	0.028808	0.264525	0.0629543					0.0405252	0.0979355	0.0370161
2.23543	-0.00655061	0.0109205	-0.0597845	-0.0262586	0.0340321	0.2747	0.0664976					0.0419366	0.102229	0.0386389
2.33374	-0.0137929	0.0131961	-0.0638283	-0.0259583	0.0397369	0.284669	0.0702425					0.0434664	0.106527	0.0402636
2.43204	-0.0207632	0.0154298	-0.0678821	-0.025642	0.0458259	0.294465	0.0741796					0.0450875	0.110852	0.041898
2.53034	-0.027421	0.0174807	-0.0721092	-0.0253172	0.0522241	0.304146	0.0781922					0.0467422	0.115233	0.043554
2.62865	-0.0337674	0.0193042	-0.0765932	-0.0249248	0.0589738	0.313682	0.0823206					0.0484278	0.119663	0.0452284
2.72695	-0.0397214	0.0207426	-0.0813086	-0.0244677	0.0659279	0.322912	0.086625					0.0501014	0.124079	0.0468975
2.82526	-0.0452537	0.0219129	-0.0862316	-0.0239576	0.0730789	0.331815	0.0911242					0.0517841	0.128459	0.048553
2.92356	-0.0502684	0.0229496	-0.091318	-0.0234173	0.0804089	0.340363	0.0957927					0.0535015	0.132769	0.0501819
3.02186	-0.0547504	0.0238595	-0.0965333	-0.0228204	0.0878869	0.348572	0.100599					0.055259	0.136997	0.0517802
3.12017	-0.0587532	0.0246549	-0.101939	-0.0222283	0.0955377	0.356295	0.105487					0.0570076	0.141117	0.053337
3.21847	-0.0621473	0.0253209	-0.107463	-0.0216816	0.103266	0.363403	0.110457					0.0587365	0.145061	0.0548278
3.31678	-0.0649737	0.0258709	-0.113073	-0.0211311	0.111052	0.36979	0.115485					0.0604314	0.148792	0.056238
3.41508	-0.0672069	0.026358	-0.118837	-0.0206698	0.118915	0.375485	0.120453					0.062071	0.15233	0.0575752
3.51338	-0.0688186	0.0268125	-0.124642	-0.0202521	0.126933	0.38075	0.125392					0.0637391	0.155732	0.0588612
3.61169	-0.0699014	0.0272141	-0.130487	-0.0198952	0.135035	0.385646	0.130177					0.0653985	0.159021	0.0601044
3.70999	-0.0704882	0.0275912	-0.136536	-0.0195639	0.143127	0.390096	0.134682					0.0669867	0.162192	0.0613028
3.8083	-0.0705541	0.0278865	-0.142843	-0.0191559	0.151179	0.394075	0.138846					0.0684905	0.165235	0.062453
3.9066	-0.0700805	0.0281576	-0.149397	-0.0186861	0.159164	0.397573	0.142736					0.0699238	0.168149	0.0635543
4.0049	-0.0690731	0.0284279	-0.156099	-0.0182137	0.167025	0.40071	0.146144					0.0712745	0.170939	0.064609
4.10321	-0.0676185	0.0288011	-0.162897	-0.017719	0.174688	0.40337	0.14905					0.0725251	0.173564	0.0656011
4.20151	-0.0657425	0.0292787	-0.169731	-0.017267	0.182197	0.405616	0.151588					0.0737058	0.176051	0.066541
4.29982	-0.0634687	0.0298955	-0.176507	-0.0169263	0.189505	0.407377	0.153694					0.0747955	0.178362	0.0674147
4.39812	-0.0607465	0.0306068	-0.183134	-0.0167139	0.196581	0.408563	0.155295					0.0757789	0.180448	0.0682031
4.49642	-0.0575852	0.0314533	-0.189464	-0.0167023	0.20354	0.409302	0.156433					0.0767111	0.182333	0.0689154
4.59473	-0.0540075	0.0325759	-0.195379	-0.0169362	0.210372	0.40948	0.157316					0.0776316	0.183976	0.0695363
4.69303	-0.0500599	0.0339238	-0.200815	-0.0174467	0.217036	0.409119	0.157962					0.0785314	0.185377	0.070066
4.79134	-0.0458125	0.0356477	-0.20587	-0.0182824	0.223605	0.408186	0.158296					0.0793956	0.18656	0.0705131
4.88964	-0.0413032	0.0376444	-0.210514	-0.0194009	0.230159	0.406654	0.158376					0.0802306	0.187533	0.0708808
4.98794	-0.0365526	0.0397665	-0.214762	-0.0207801	0.236649	0.404555	0.158129					0.0810006	0.188307	0.0711733
5.08625	-0.0316006	0.0419743	-0.218539	-0.0224235	0.242959	0.401933	0.157681					0.081712	0.188879	0.0713896
5.18455	-0.0264426	0.0442517	-0.221785	-0.0242331	0.249116	0.399043	0.157095					0.082435	0.189299	0.0715482
5.28286	-0.0211343	0.0466137	-0.224559	-0.0262666	0.255161	0.396052	0.156253					0.08316	0.189626	0.0716719
5.38116	-0.0157316	0.0490306	-0.226893	-0.0285315	0.261015	0.393117	0.155195					0.083886	0.189904	0.0717768
5.47946	-0.010329	0.0514398	-0.228845	-0.0309146	0.266671	0.390266	0.153859					0.0845924	0.190143	0.0718673
5.57777	-0.00499448	0.0537502	-0.230538	-0.0334667	0.272121	0.387293	0.152256					0.0852029	0.190335	0.07194
5.67607	0.000284585	0.0558705	-0.231961	-0.0363286	0.277339	0.384097	0.150419					0.0856744	0.190466	0.0719892
5.77438	0.00554838	0.0577423	-0.232952	-0.0394822	0.282376	0.380616	0.148361					0.0860299	0.190487	0.0719974
5.87268	0.0107739	0.0594015	-0.233404	-0.0429694	0.287239	0.376749	0.146126					0.0862737	0.190362	0.0719502
5.97098	0.0158884	0.0607778	-0.233264	-0.0467879	0.291899	0.372653	0.143756					0.0864176	0.190117	0.0718577
6.06929	0.0208506	0.0618373	-0.232585	-0.0508871	0.296393	0.368253	0.141523					0.0864836	0.189765	0.0717245
6.16759	0.0256923	0.0625668	-0.231306	-0.0553186	0.300748	0.363496	0.139432					0.0864728	0.18929	0.0715448
6.2659	0.03038	0.0629875	-0.229436	-0.0600025	0.304921	0.358332	0.137425					0.0863726	0.18867	0.0713105
6.3642	0.0348815	0.0630987	-0.227095	-0.064936	0.308954	0.352726	0.135479					0.0861582	0.187939	0.0710343
6.4625	0.0391626	0.0630247	-0.224336	-0.0701184	0.312895	0.34687	0.133543					0.0858628	0.187158	0.0707392
6.56081	0.0431417	0.062701	-0.221226	-0.0755562	0.316665	0.340706	0.131558					0.0854272	0.186326	0.0704248
6.65911	0.0468218	0.062009	-0.217896	-0.0811749	0.320247	0.334285	0.12943					0.0848174	0.185474	0.0701026
6.75742	0.050234	0.0609828	-0.214452	-0.0869145	0.323681	0.327567	0.127138					0.0840338	0.184619	0.0697792
6.85572	0.0533169	0.0595607	-0.210748	-0.0927076	0.326946	0.320662	0.124867					0.0831281	0.183746	0.0694493
6.95402	0.0561042	0.0578524	-0.206779	-0.098533	0.329862	0.313755	0.122511					0.0821104	0.182845	0.0691089
7.05233	0.058465	0.0560004	-0.202499	-0.104358	0.332502	0.306796	0.120193					0.0810143	0.181909	0.068755
7.15063	0.0604215	0.0540467	-0.19802	-0.110179	0.335082	0.299674	0.117942					0.0798525	0.180982	0.068405
7.24894	0.0619462	0.0519724	-0.193378	-0.116066	0.33749	0.292209	0.115741					0.0785592	0.180034	0.0680465
7.34724	0.0629683	0.0498015	-0.1885	-0.121875	0.339765	0.284374	0.113665					0.0771713	0.179034	0.0676684
7.44554	0.0635683	0.0476273	-0.183309	-0.127651	0.341989	0.276253	0.111711					0.0757412	0.178005	0.0672796
7.54385	0.0639008	0.0455571	-0.177703	-0.133444	0.344109	0.267849	0.110038					0.0743294	0.176931	0.0668737
7.64215	0.0639556	0.0436937	-0.171629	-0.139193	0.346136	0.25922	0.108672					0.0729793	0.17581	0.0664499
7.74046	0.0637372	0.0422733	-0.165131	-0.144717	0.34822	0.250578	0.1077					0.0718085	0.174688	0.0660259
7.83876	0.0631848	0.0413674	-0.158319	-0.150016	0.350393	0.241976	0.107188					0.0708249	0.173607	0.0656175
7.93706	0.06228	0.0409481	-0.151267	-0.155043	0.352561	0.233436	0.107069					0.0699977	0.172558	0.0652207
8.03537	0.0610912	0.04105	-0.144047	-0.159755	0.354771	0.22484	0.107332					0.069326	0.17154	0.064836
8.13367	0.0596867	0.0417047	-0.136524	-0.164138	0.356996	0.2163	0.107981					0.0688581	0.170538	0.0644575
8.23198	0.058092	0.042951	-0.128758	-0.168189	0.35923	0.208065	0.109036					0.0686323	0.169596	0.0641012
8.33028	0.0564039	0.0447019	-0.120698	-0.171946	0.361611	0.200133	0.110513					0.0686741	0.168747	0.0637804
8.42858	0.0546448	0.0469658	-0.112281	-0.175385	0.36405	0.192536	0.112437					0.0689955	0.167963	0.0634839
8.52689	0.0527753	0.049632	-0.103617	-0.178504	0.366416	0.185188	0.114852					0.0695345	0.167225	0.0632051
8.62519	0.050898	0.0526761	-0.0947238	-0.181229	0.368779	0.178127	0.117898					0.0703465	0.166548	0.0629493
8.72349	0.0490658	0.0561282	-0.0854672	-0.183583	0.371168	0.171435	0.121599					0.071478	0.165936	0.0627179
8.8218	0.0473113	0.0599966	-0.075707	-0.185636	0.373571	0.165114	0.126036					0.0729551	0.16539	0.0625114
8.9201	0.0457306	0.0642973	-0.0656291	-0.187466	0.375948	0.159181	0.130996					0.0747224	0.164936	0.06234
9.01841	0.0443091	0.0689633	-0.0553453	-0.189089	0.378396	0.153496	0.13656					0.0767558	0.164616	0.0622192
9.11671	0.0431538	0.0738783	-0.0449493	-0.190583	0.380875	0.148055	0.14262					0.0790071	0.164444	0.0621542
9.21501	0.0422604	0.0789378	-0.03441	-0.191922	0.383179	0.142989	0.14905					0.0814407	0.164358	0.0621216
9.31332	0.0416347	0.0840772	-0.0236979	-0.193086	0.385441	0.138286	0.155953					0.0840869	0.164387	0.0621324
9.41162	0.0413207	0.0893757	-0.0128843	-0.194165	0.387529	0.133904	0.163384					0.0869234	0.164523	0.0621839
9.50993	0.0413064	0.0947477	-0.0020312	-0.195104	0.389364	0.129686	0.171392					0.0899086	0.164736	0.0622644
9.60823	0.0415076	0.0999823	0.00874338	-0.195914	0.390953	0.125652	0.179862					0.0929696	0.165036	0.0623778
9.70653	0.0419995	0.105034	0.019493	-0.196614	0.392208	0.121841	0.188707					0.0960955	0.165389	0.0625113
9.80484	0.0428099	0.109667	0.0302473	-0.197215	0.393073	0.118113	0.197919					0.0992305	0.165775	0.0626572
9.90314	0.0439794	0.113878	0.0410513	-0.197722	0.393468	0.114469	0.207478					0.102372	0.166171	0.0628066
10.0014	0.0454788	0.1177	0.0518264	-0.198178	0.393403	0.11103	0.217461					0.105532	0.166608	0.0629717
10.0998	0.047261	0.121197	0.0625634	-0.198615	0.39282	0.107836	0.22781					0.108696	0.167082	0.063151
10.1981	0.0492824	0.124403	0.0730657	-0.199058	0.391673	0.104813	0.238336					0.111788	0.167584	0.0633406
10.2964	0.0514429	0.12723	0.0833885	-0.19938	0.390009	0.101694	0.249001					0.114769	0.168093	0.0635331
10.3947	0.0536398	0.129762	0.0934051	-0.199603	0.387668	0.0984388	0.259781					0.117585	0.168591	0.0637215
10.493	0.0559222	0.132008	0.103157	-0.199762	0.384656	0.0950341	0.270652					0.120238	0.169091	0.0639106
10.5913	0.0583404	0.134099	0.112817	-0.19978	0.381089	0.0915096	0.281623					0.122814	0.169603	0.064104
10.6896	0.060859	0.136154	0.122405	-0.199652	0.376939	0.0878647	0.292602					0.12531	0.17012	0.0642995
10.7879	0.0633997	0.138242	0.131813	-0.199365	0.372133	0.0840872	0.303544					0.127693	0.170631	0.0644925
10.8862	0.0658939	0.140348	0.140891	-0.198872	0.366654	0.0802009	0.314241					0.129908	0.171098	0.064669
10.9845	0.068313	0.142483	0.149671	-0.198128	0.360596	0.0761473	0.324771					0.131979	0.171547	0.0648387
11.0828	0.0706669	0.144686	0.158283	-0.197181	0.353981	0.071945	0.335038					0.133917	0.171986	0.0650046
11.1811	0.0729298	0.146949	0.166786	-0.195941	0.346781	0.0677167	0.345008					0.135747	0.172381	0.0651538
11.2794	0.0751397	0.149393	0.175247	-0.194406	0.339136	0.0634509	0.354709					0.137524	0.172766	0.0652994
11.3777	0.0773358	0.152224	0.183683	-0.192585	0.33104	0.0592318	0.364063					0.139285	0.17313	0.065437
11.476	0.0795131	0.155293	0.192114	-0.190417	0.322544	0.0550784	0.373007					0.141019	0.173454	0.0655593
11.5743	0.0816504	0.158632	0.200483	-0.1879	0.313672	0.0510622	0.381506					0.142729	0.173729	0.0656635
11.6726	0.0836787	0.162486	0.20892	-0.184986	0.304402	0.0471158	0.389515					0.144447	0.173953	0.0657482
11.7709	0.0854998	0.166875	0.217338	-0.181705	0.29475	0.0432185	0.397027					0.146143	0.174143	0.0658198
11.8692	0.0870848	0.17193	0.22562	-0.178132	0.284709	0.039465	0.403905					0.147797	0.174285	0.0658735
11.9675	0.0884233	0.177624	0.233673	-0.174296	0.274346	0.0358827	0.410111					0.149395	0.174382	0.0659102
12.0658	0.0895639	0.183856	0.24154	-0.170193	0.263717	0.032429	0.415532					0.150921	0.174421	0.0659248
12.1641	0.0905049	0.190546	0.249239	-0.165878	0.252827	0.0291568	0.420112					0.152358	0.174401	0.0659173
12.2624	0.0912553	0.197683	0.256873	-0.161387	0.241826	0.0261992	0.423873					0.15376	0.174345	0.0658963
12.3607	0.0919122	0.205286	0.264348	-0.156882	0.230693	0.0237365	0.426779					0.155125	0.174257	0.0658631
12.459	0.0924881	0.213216	0.271713	-0.152288	0.21954	0.0218188	0.428849					0.156477	0.17412	0.0658113
12.5573	0.0928731	0.221428	0.278869	-0.147601	0.208476	0.020537	0.430155					0.15782	0.173937	0.0657419
12.6557	0.0930479	0.229769	0.285708	-0.142934	0.197469	0.0198894	0.430596					0.159078	0.173688	0.0656479
12.754	0.0930063	0.238087	0.292125	-0.138349	0.186573	0.0198161	0.430144					0.1602	0.173366	0.0655261
12.8523	0.0928026	0.246198	0.298244	-0.133901	0.175917	0.0202746	0.428786					0.161189	0.172977	0.0653792
12.9506	0.0924311	0.254067	0.304154	-0.129625	0.165473	0.0214029	0.426653					0.162079	0.17254	0.0652139
13.0489	0.0918351	0.261672	0.309879	-0.125524	0.155149	0.0233175	0.42374					0.162867	0.172037	0.065024
13.1472	0.0909731	0.26899	0.315279	-0.121548	0.144967	0.0260619	0.420042					0.163538	0.171432	0.0647954
13.2455	0.0898448	0.276022	0.320253	-0.117758	0.134973	0.0295007	0.415581					0.16406	0.170745	0.0645355
13.3438	0.08833	0.282661	0.324632	-0.114184	0.124993	0.0336154	0.410378					0.164347	0.169966	0.0642409
13.4421	0.0863787	0.288771	0.328293	-0.110825	0.115057	0.0384064	0.404392					0.164353	0.169061	0.0638989
13.5404	0.0840043	0.294427	0.331223	-0.10777	0.105238	0.043824	0.397663					0.164087	0.168067	0.0635235
13.6387	0.0811873	0.299579	0.333513	-0.105089	0.0955975	0.0498169	0.390122					0.163532	0.167003	0.0631211
13.737	0.0780207	0.304064	0.335093	-0.10286	0.0862124	0.0563352	0.381842					0.162673	0.165867	0.0626918
13.8353	0.0744921	0.307841	0.335933	-0.101085	0.077063	0.0633278	0.372748					0.161474	0.164646	0.0622302
13.9336	0.070639	0.310813	0.336171	-0.0997355	0.0682565	0.0707417	0.363016					0.159986	0.16337	0.061748
14.0319	0.0664804	0.312905	0.33594	-0.0987808	0.0598551	0.0785164	0.35268					0.158228	0.16205	0.061249
14.1302	0.0620159	0.314174	0.335265	-0.0982152	0.0518775	0.0866081	0.341814					0.15622	0.160711	0.0607431
14.2285	0.0572629	0.314718	0.334149	-0.0979535	0.044361	0.0948979	0.330527					0.153995	0.159373	0.0602373
14.3268	0.052212	0.314572	0.332509	-0.0979621	0.0371962	0.103335	0.318819					0.151526	0.158036	0.0597319
14.4251	0.0468458	0.313662	0.330326	-0.0982011	0.03043	0.111748	0.306653					0.148781	0.156679	0.059219
14.5234	0.0411824	0.312126	0.327572	-0.0987304	0.0240135	0.120018	0.29401					0.145742	0.155337	0.058712
14.6217	0.0352635	0.31005	0.324267	-0.0995427	0.0180089	0.128032	0.280924					0.142429	0.154025	0.0582158
14.72	0.0290968	0.307525	0.320375	-0.10063	0.0124772	0.13574	0.267458					0.138863	0.152746	0.0577324
14.8183	0.0227046	0.304606	0.316045	-0.101974	0.0073098	0.143237	0.253711					0.135091	0.151552	0.0572811
14.9166	0.0160999	0.301452	0.311111	-0.103554	0.00247176	0.150498	0.239703					0.131112	0.150441	0.0568613
15.0149	0.00930982	0.298111	0.305612	-0.105348	-0.00187946	0.157306	0.22546					0.126939	0.149399	0.0564675
15.1133	0.00243392	0.294575	0.299615	-0.107371	-0.00561802	0.163529	0.211051					0.122602	0.148408	0.056093
15.2116	-0.00451676	0.290812	0.293174	-0.109619	-0.00873558	0.169024	0.196583					0.118103	0.14746	0.0557347
15.3099	-0.0115414	0.2869	0.286363	-0.11207	-0.0111768	0.173912	0.182133					0.113503	0.146566	0.0553967
15.4082	-0.0184665	0.282917	0.279385	-0.114692	-0.012734	0.178146	0.167684					0.108891	0.145704	0.055071
15.5065	-0.0252639	0.278839	0.27231	-0.117458	-0.0134481	0.181729	0.153369					0.104297	0.144875	0.0547578
15.6048	-0.0319147	0.274619	0.265111	-0.120346	-0.0133905	0.184654	0.13917					0.0997005	0.144056	0.054448
15.7031	-0.0384096	0.270249	0.257706	-0.123273	-0.0125956	0.186956	0.125222					0.0951221	0.143214	0.0541299
15.8014	-0.0447619	0.265791	0.250124	-0.126227	-0.010982	0.188798	0.111582					0.0906178	0.142367	0.0538096
15.8997	-0.0508404	0.261323	0.242452	-0.129154	-0.00851703	0.190208	0.0984594					0.0862758	0.141512	0.0534864
15.998	-0.056668	0.256932	0.234681	-0.132027	-0.00536021	0.191183	0.0857975					0.082077	0.14067	0.0531682
16.0963	-0.0622317	0.252742	0.226687	-0.134884	-0.00150638	0.191816	0.0736752					0.0780425	0.139858	0.0528612
16.1946	-0.0674572	0.24885	0.218464	-0.137774	0.00307589	0.192072	0.062129					0.0741941	0.139085	0.0525692
16.2929	-0.0723381	0.245106	0.209934	-0.140752	0.00841148	0.192001	0.0511396					0.0705002	0.138332	0.0522848
16.3912	-0.0768214	0.241365	0.201149	-0.143801	0.0145674	0.191569	0.0408284					0.0669795	0.137567	0.0519954
16.4895	-0.0808737	0.237731	0.192197	-0.146925	0.0215081	0.190957	0.031315					0.0637015	0.136845	0.0517225
16.5878	-0.0844969	0.234103	0.183216	-0.150081	0.0292665	0.190326	0.0225669					0.0607002	0.13619	0.0514751
16.6861	-0.0875842	0.230358	0.174263	-0.153313	0.0377586	0.189748	0.0145123					0.0579633	0.13561	0.0512559
16.7844	-0.0901076	0.226457	0.165453	-0.15659	0.0469352	0.189204	0.00719807					0.0555072	0.13511	0.0510668
16.8827	-0.0920969	0.222437	0.156753	-0.159875	0.0567997	0.188652	0.000586255					0.0533222	0.134698	0.0509111
16.981	-0.0936352	0.218272	0.148277	-0.163175	0.0673431	0.188114	-0.00525359					0.0514203	0.134411	0.0508025
17.0793	-0.0946497	0.213994	0.139971	-0.166528	0.0784036	0.187609	-0.01039					0.0497728	0.134263	0.0507468
17.1776	-0.095146	0.20964	0.131831	-0.169908	0.0899254	0.187141	-0.0148356					0.0483783	0.134268	0.0507485
17.2759	-0.0950687	0.205248	0.123902	-0.173325	0.101812	0.186865	-0.018603					0.0472616	0.134458	0.0508203
17.3742	-0.094357	0.200815	0.116211	-0.176773	0.113899	0.186584	-0.0216872					0.0463846	0.134791	0.0509461
17.4725	-0.0931195	0.196388	0.108667	-0.180297	0.126061	0.186283	-0.0240797					0.0457006	0.135282	0.0511317
17.5709	-0.0913693	0.191997	0.101313	-0.183922	0.138274	0.185924	-0.0259709					0.045178	0.13595	0.0513844
17.6692	-0.0891183	0.187664	0.0941588	-0.187618	0.150493	0.185509	-0.0273948					0.0448133	0.13679	0.0517018
17.7675	-0.0863529	0.183445	0.0873354	-0.191377	0.162626	0.184963	-0.0284828					0.0445938	0.137794	0.0520814
17.8658	-0.0830842	0.179392	0.0807757	-0.19511	0.17456	0.184251	-0.029221					0.044509	0.138916	0.0525052
17.9641	-0.0793926	0.175457	0.0744636	-0.19888	0.186317	0.183394	-0.0297287					0.0445187	0.140175	0.0529814
18.0624	-0.0752855	0.171544	0.0684058	-0.202721	0.197941	0.182312	-0.0300523					0.0445918	0.141559	0.0535042
18.1607	-0.0707907	0.167596	0.062716	-0.206547	0.209262	0.180931	-0.0303036					0.0446948	0.143007	0.0540515
18.259	-0.0659825	0.16351	0.0574463	-0.21025	0.220154	0.17935	-0.0304618					0.0448236	0.144466	0.0546029
18.3573	-0.0608926	0.159453	0.0527987	-0.213778	0.230566	0.177613	-0.0305297					0.0450329	0.145928	0.0551557
18.4556	-0.0555825	0.155522	0.0488526	-0.217105	0.240445	0.175737	-0.0306072					0.0453232	0.147383	0.0557056
18.5539	-0.0501319	0.15172	0.0456031	-0.220159	0.249795	0.17364	-0.0307187					0.0456784	0.14879	0.0562372
18.6522	-0.0445719	0.148179	0.0429303	-0.222968	0.258489	0.171242	-0.030786					0.0460735	0.15011	0.0567361
18.7505	-0.0390467	0.144988	0.0408124	-0.225403	0.26646	0.168536	-0.0307845					0.0465089	0.151294	0.0571839
18.8488	-0.0335388	0.142164	0.0392658	-0.22741	0.273804	0.165591	-0.0306843					0.0470273	0.152335	0.0575773
18.9471	-0.0280806	0.139654	0.0383504	-0.229004	0.280487	0.162397	-0.0305443					0.0476086	0.153212	0.0579088
19.0454	-0.0225882	0.137484	0.0380242	-0.230154	0.286472	0.159013	-0.0303793					0.0482674	0.153899	0.0581684
19.1437	-0.0171488	0.135637	0.0383185	-0.230769	0.291781	0.155532	-0.0301352					0.0490308	0.154375	0.0583481
19.242	-0.0118013	0.134045	0.0391741	-0.230912	0.296437	0.151926	-0.029849					0.0498601	0.154646	0.0584507
19.3403	-0.00656616	0.132657	0.0406279	-0.230562	0.300482	0.148116	-0.0294134					0.050763	0.154691	0.0584676
19.4386	-0.00154122	0.13138	0.0427319	-0.229688	0.303991	0.144446	-0.0288423					0.0517825	0.154542	0.0584115
19.5369	0.00332903	0.130143	0.0455198	-0.228238	0.306988	0.140997	-0.0281212					0.0529454	0.154181	0.058275
19.6352	0.0081103	0.128974	0.049048	-0.226156	0.309416	0.137883	-0.0271228					0.0543076	0.153573	0.0580452
19.7335	0.0128102	0.127899	0.0533493	-0.223448	0.311455	0.135257	-0.0257641					0.0559369	0.152764	0.0577392
19.8318	0.0174091	0.126955	0.0583034	-0.220179	0.313218	0.133197	-0.0240127					0.0578416	0.1518	0.057375
19.9301	0.0218708	0.126094	0.0639744	-0.216377	0.314697	0.131683	-0.0219553					0.0599981	0.150688	0.0569547
20.0285	0.0262464	0.125318	0.0703267	-0.211989	0.31588	0.130709	-0.0195037					0.0624267	0.149401	0.0564682
20.1268	0.0305527	0.124709	0.0772852	-0.207003	0.316782	0.130403	-0.0166111					0.0651597	0.147948	0.0559191
20.2251	0.034803	0.124285	0.0848036	-0.201519	0.317501	0.130824	-0.0132293					0.0682099	0.146379	0.0553262
20.3234	0.0389656	0.124092	0.0927745	-0.195664	0.318108	0.131845	-0.00933068					0.0715415	0.144738	0.0547059
20.4217	0.0430535	0.124033	0.100987	-0.189516	0.318661	0.133404	-0.00487304					0.0751071	0.143044	0.0540654
20.52	0.0470927	0.12408	0.109362	-0.183176	0.319118	0.135445	0.000211516					0.0788762	0.141299	0.0534061
20.6183	0.0511231	0.1242	0.117871	-0.176688	0.319515	0.137903	0.00589683					0.0828315	0.139522	0.0527345
20.7166	0.0552652	0.124301	0.126512	-0.169994	0.320017	0.140822	0.0120544					0.0869968	0.137745	0.0520627
20.8149	0.0595632	0.124366	0.135217	-0.163172	0.320624	0.144142	0.0187299					0.0913528	0.13598	0.0513955
20.9132	0.0639328	0.124346	0.143896	-0.156321	0.321194	0.147872	0.0258223					0.0958202	0.134227	0.0507332
21.0115	0.0684025	0.12424	0.15243	-0.149488	0.321884	0.151987	0.0333073					0.100395	0.132536	0.050094
21.1098	0.0728799	0.12402	0.160927	-0.142685	0.322637	0.156472	0.0410957					0.105049	0.130913	0.0494805
21.2081	0.0773491	0.123639	0.169397	-0.135962	0.323419	0.161304	0.0492005					0.109764	0.129368	0.0488967
21.3064	0.0817482	0.123163	0.177943	-0.12926	0.324044	0.166507	0.0576214					0.114538	0.127862	0.0483272
21.4047	0.0860173	0.122664	0.186491	-0.122591	0.324503	0.172078	0.0660961					0.119323	0.126417	0.0477812
21.503	0.0901541	0.122267	0.194931	-0.116006	0.324922	0.17769	0.0746338					0.124085	0.125055	0.0472665
21.6013	0.0941036	0.121989	0.203144	-0.109548	0.325285	0.183272	0.0832988					0.128792	0.123769	0.0467802
21.6996	0.0977806	0.121779	0.210942	-0.103237	0.325649	0.188696	0.092032					0.133377	0.122558	0.0463224
21.7979	0.101133	0.121669	0.218366	-0.0970984	0.325866	0.193804	0.100762					0.137786	0.121391	0.0458814
21.8962	0.104188	0.121616	0.225479	-0.091144	0.325944	0.198546	0.109454					0.142012	0.120275	0.0454595
21.9945	0.106974	0.121619	0.232353	-0.0854713	0.325883	0.202894	0.118116					0.146053	0.119239	0.0450681
22.0928	0.109373	0.121668	0.23898	-0.080116	0.325682	0.206804	0.126643					0.149862	0.118298	0.0447123
22.1911	0.111322	0.121778	0.245346	-0.0750482	0.325304	0.210229	0.13501					0.15342	0.117432	0.0443851
22.2894	0.112767	0.121975	0.251473	-0.0702475	0.324807	0.213059	0.143236					0.156724	0.116644	0.0440873
22.3877	0.113723	0.122185	0.257443	-0.0656478	0.324201	0.215543	0.151163					0.159802	0.115948	0.0438244
22.4861	0.114199	0.122421	0.263364	-0.0611923	0.323389	0.217679	0.158696					0.162651	0.115323	0.0435879
22.5844	0.114182	0.122688	0.269221	-0.0568014	0.322421	0.219414	0.16582					0.165278	0.11475	0.0433714
22.6827	0.113673	0.123044	0.27508	-0.0525095	0.321257	0.220979	0.172586					0.16773	0.114254	0.043184
22.781	0.11256	0.123556	0.281009	-0.0484677	0.31986	0.22231	0.179139					0.169995	0.113883	0.0430438
22.8793	0.110859	0.124252	0.287096	-0.0446939	0.318266	0.223467	0.185306					0.172079	0.113667	0.042962
22.9776	0.108624	0.125231	0.293317	-0.0411319	0.316602	0.224419	0.191187					0.174035	0.113606	0.0429389
23.0759	0.105933	0.126585	0.2997	-0.0377216	0.31474	0.225122	0.196877					0.175891	0.113658	0.0429588
23.1742	0.102883	0.128239	0.306046	-0.034474	0.312893	0.225616	0.202424					0.177661	0.113841	0.0430279
23.2725	0.0995156	0.130228	0.31227	-0.0314384	0.311253	0.225915	0.207735					0.179354	0.114179	0.0431557
23.3708	0.0959505	0.13252	0.318163	-0.0286532	0.310047	0.226102	0.21279					0.180988	0.114673	0.0433424
23.4691	0.0922936	0.135118	0.323726	-0.0261784	0.309281	0.226133	0.217718					0.182584	0.11532	0.0435869
23.5674	0.0886784	0.137916	0.329014	-0.0240368	0.308812	0.226105	0.222441					0.184133	0.116095	0.0438799
23.6657	0.0852002	0.140871	0.334135	-0.0222283	0.308743	0.226085	0.226832					0.185663	0.11701	0.0442256
23.764	0.0819442	0.143992	0.339192	-0.0208173	0.309089	0.226147	0.230909					0.187208	0.118081	0.0446306
23.8623	0.0789305	0.147198	0.344066	-0.0197613	0.309782	0.226374	0.234746					0.188762	0.119264	0.0450774
23.9606	0.0761593	0.15049	0.34864	-0.0190167	0.310768	0.226732	0.238328					0.1903	0.120502	0.0455454
24.0589	0.0736799	0.153827	0.352784	-0.0185073	0.312006	0.227157	0.241668					0.191802	0.121729	0.0460093
24.1572	0.0716441	0.157203	0.356528	-0.0182639	0.313493	0.227764	0.244759					0.193304	0.122933	0.0464644
24.2555	0.0701187	0.160586	0.359968	-0.0183449	0.315232	0.228644	0.247565					0.194824	0.124132	0.0469173
24.3538	0.0691726	0.163918	0.363016	-0.0187712	0.317139	0.229845	0.24987					0.196313	0.125275	0.0473495
24.4521	0.0688233	0.167337	0.365589	-0.019534	0.319187	0.231015	0.251737					0.197736	0.12632	0.0477445
24.5504	0.0690274	0.170829	0.367666	-0.0206939	0.321438	0.232173	0.253205					0.199092	0.127296	0.0481133
24.6487	0.0697749	0.174417	0.369256	-0.022292	0.323848	0.233329	0.254166					0.200357	0.128205	0.0484571
24.747	0.0710268	0.178028	0.370305	-0.0242361	0.32635	0.234199	0.25461					0.201469	0.129009	0.0487609
24.8453	0.0727565	0.181582	0.370735	-0.0264216	0.32887	0.234811	0.254438					0.202396	0.129664	0.0490085
24.9437	0.0750202	0.185014	0.370586	-0.0288443	0.331378	0.235066	0.253751					0.203139	0.130178	0.0492026
25.042	0.0777708	0.188203	0.369966	-0.0315267	0.333752	0.234859	0.252398					0.203632	0.130565	0.0493488
25.1403	0.080883	0.191076	0.368865	-0.0344767	0.336008	0.234328	0.250298					0.203855	0.130858	0.0494595
25.2386	0.0843103	0.193738	0.367475	-0.0377099	0.33791	0.233326	0.247511					0.203795	0.131075	0.0495415
25.3369	0.0880417	0.196145	0.365895	-0.0411948	0.33918	0.231776	0.244056					0.203414	0.131195	0.0495872
25.4352	0.09199	0.198346	0.364331	-0.0449294	0.339661	0.22963	0.239927					0.202708	0.131252	0.0496087
25.5335	0.096045	0.200334	0.362782	-0.0488844	0.339442	0.226962	0.23514					0.201689	0.131276	0.0496178
25.6318	0.0999906	0.202153	0.361191	-0.0530263	0.338501	0.223848	0.229771					0.200347	0.131284	0.0496206
25.7301	0.103636	0.203914	0.35955	-0.0573603	0.336692	0.220153	0.223904					0.198641	0.13128	0.0496192
25.8284	0.106911	0.205654	0.357916	-0.0618666	0.33408	0.215745	0.217486					0.196561	0.131289	0.0496225
25.9267	0.109843	0.207444	0.356363	-0.0665839	0.330857	0.210544	0.210505					0.194139	0.131369	0.0496528
26.025	0.11243	0.209287	0.355035	-0.0714923	0.327017	0.204614	0.203147					0.191434	0.131556	0.0497237
26.1233	0.114599	0.211191	0.353926	-0.0765866	0.322631	0.198008	0.195385					0.18845	0.131878	0.049845
26.2216	0.116281	0.2131	0.352969	-0.0818539	0.317753	0.190633	0.187298					0.185168	0.13234	0.0500197
26.3199	0.117453	0.214972	0.352049	-0.0872802	0.312517	0.182474	0.178979					0.181595	0.132947	0.0502494
26.4182	0.11803	0.216863	0.351233	-0.0928117	0.306949	0.173659	0.170695					0.177802	0.133714	0.050539
26.5165	0.118009	0.218642	0.350627	-0.0984482	0.301021	0.164467	0.162445					0.173823	0.134649	0.0508924
26.6148	0.117457	0.220323	0.350227	-0.104158	0.294775	0.154924	0.154194					0.169677	0.135743	0.051306
26.7131	0.116355	0.221948	0.350058	-0.109936	0.28827	0.14508	0.146019					0.165399	0.137007	0.0517839
26.8114	0.11474	0.223511	0.350089	-0.115834	0.281661	0.135125	0.1379					0.161028	0.138462	0.0523337
26.9097	0.112718	0.224972	0.350354	-0.121797	0.275062	0.125029	0.129934					0.15661	0.140095	0.0529511
27.008	0.110232	0.226324	0.35073	-0.127742	0.268535	0.114928	0.122167					0.152168	0.141856	0.0536166
27.1063	0.107358	0.227677	0.351152	-0.133637	0.2621	0.105074	0.114819					0.147792	0.143702	0.0543143
27.2046	0.104144	0.228991	0.351703	-0.139541	0.255744	0.0953129	0.107908					0.143466	0.145654	0.055052
27.3029	0.100621	0.230163	0.352279	-0.145402	0.249555	0.0857446	0.101406					0.139195	0.147662	0.0558108
27.4013	0.0967806	0.231229	0.35279	-0.151144	0.243787	0.0763666	0.0954554					0.135038	0.149699	0.0565808
27.4996	0.0926605	0.232083	0.353129	-0.156713	0.238553	0.0671977	0.0901502					0.131009	0.151712	0.0573416
27.5979	0.0883387	0.232658	0.353305	-0.162044	0.233766	0.0582994	0.0854276					0.127107	0.153654	0.0580756
27.6962	0.0839719	0.232869	0.353393	-0.167093	0.229543	0.0495496	0.0812839					0.123359	0.155524	0.0587827
27.7945	0.0796853	0.232572	0.353352	-0.17181	0.22593	0.0412122	0.0776955					0.119805	0.157263	0.0594399
27.8928	0.0754676	0.231707	0.353081	-0.176168	0.222765	0.0333176	0.0747383					0.116416	0.158807	0.0600233
27.9911	0.0712978	0.230205	0.35261	-0.18014	0.219955	0.0258844	0.0723472					0.113166	0.160134	0.0605251
28.0894	0.0671526	0.228078	0.351882	-0.183764	0.21757	0.0190328	0.0703456					0.110043	0.161246	0.0609452
28.1877	0.0630508	0.225421	0.350994	-0.187103	0.215536	0.0126524	0.0687264					0.10704	0.162187	0.0613008
28.286	0.0589535	0.222384	0.350094	-0.190069	0.213668	0.00674373	0.0674878					0.10418	0.162964	0.0615947
28.3843	0.0548278	0.219059	0.349293	-0.192641	0.211848	0.00115674	0.0665819					0.101446	0.163613	0.0618397
28.4826	0.0507549	0.215337	0.348664	-0.194837	0.210063	-0.00436182	0.0659422					0.0987947	0.164163	0.0620476
28.5809	0.0466895	0.211289	0.348173	-0.19662	0.208326	-0.00998786	0.0655457					0.0962023	0.164629	0.0622239
28.6792	0.0425752	0.206952	0.347771	-0.197921	0.206593	-0.0157521	0.065501					0.0936742	0.164991	0.0623608
28.7775	0.0384347	0.202283	0.347398	-0.198746	0.204806	-0.0216143	0.0658489					0.0912014	0.16523	0.0624509
28.8758	0.0342669	0.197324	0.347099	-0.199177	0.202883	-0.0275864	0.0664814					0.0887557	0.165382	0.0625086
28.9741	0.0299841	0.192205	0.346904	-0.199266	0.200781	-0.0335382	0.0674492					0.0863598	0.165474	0.0625434
29.0724	0.0255514	0.187022	0.346899	-0.199154	0.198501	-0.0394887	0.0686436					0.0839963	0.16558	0.0625834
29.1707	0.020883	0.181735	0.34711	-0.19886	0.19613	-0.0457047	0.0699558					0.0816071	0.165756	0.06265
29.269	0.015979	0.176475	0.347472	-0.198261	0.193757	-0.0521701	0.0714687					0.0792458	0.165984	0.0627361
29.3673	0.0107755	0.171385	0.348059	-0.197379	0.191466	-0.0589282	0.0731269					0.0769292	0.166324	0.0628644
29.4656	0.00531296	0.166478	0.348895	-0.196364	0.189141	-0.0658552	0.0747286					0.0746195	0.166797	0.0630434
29.5639	-0.000413821	0.161839	0.350027	-0.195236	0.186757	-0.0728508	0.0761986					0.0723316	0.167416	0.0632773
29.6622	-0.0064259	0.157557	0.351453	-0.194077	0.184349	-0.0799541	0.0775561					0.0700655	0.168217	0.06358
29.7605	-0.012721	0.153734	0.353167	-0.193012	0.181778	-0.0871714	0.0786693					0.0677775	0.169221	0.0639596
29.8589	-0.0192694	0.1505	0.355296	-0.192072	0.179151	-0.0946945	0.0795601					0.0654959	0.170509	0.0644463
29.9572	-0.026059	0.147971	0.357906	-0.191307	0.17659	-0.102317	0.0802518					0.0632909	0.172097	0.0650467
30.0555	-0.0330888	0.146282	0.360947	-0.190751	0.174092	-0.109875	0.0807866					0.0611989	0.173967	0.0657533
30.1538	-0.0403264	0.145372	0.364423	-0.19041	0.17166	-0.117533	0.0812654					0.0592074	0.176135	0.0665729
30.2521	-0.0477509	0.145139	0.368253	-0.190215	0.169444	-0.125024	0.0817634					0.0573729	0.178535	0.0674799
30.3504	-0.0553138	0.145479	0.3723	-0.190236	0.167688	-0.132232	0.082188					0.0556962	0.181133	0.068462
30.4487	-0.0629748	0.1463	0.376502	-0.190428	0.166429	-0.139034	0.0824765					0.0541816	0.183874	0.0694979
30.547	-0.0707466	0.147747	0.380708	-0.190735	0.165695	-0.145101	0.0825906					0.0528797	0.186666	0.0705531
30.6453	-0.0784979	0.149767	0.384883	-0.191256	0.165608	-0.150336	0.0825882					0.0518224	0.189494	0.0716219
30.7436	-0.0861786	0.152298	0.389124	-0.192075	0.166157	-0.15466	0.0824577					0.0510175	0.192368	0.0727084
30.8419	-0.0937296	0.15529	0.393492	-0.193136	0.167368	-0.158037	0.0821098					0.0504796	0.195276	0.0738075
30.9402	-0.101168	0.158782	0.397975	-0.194357	0.169227	-0.160544	0.0816487					0.0502234	0.198216	0.0749186
31.0385	-0.108464	0.162733	0.402509	-0.195803	0.171678	-0.162263	0.0808486					0.0501769	0.20118	0.0760389
31.1368	-0.115503	0.167064	0.407058	-0.197344	0.174716	-0.163269	0.0798539					0.0503678	0.204133	0.0771552
31.2351	-0.122255	0.171801	0.411587	-0.198966	0.178255	-0.163462	0.0786332					0.0507991	0.207043	0.0782548
31.3334	-0.128651	0.176859	0.416063	-0.200745	0.1822	-0.162671	0.0770833					0.0514485	0.209867	0.0793223
31.4317	-0.134563	0.182093	0.420371	-0.202725	0.186446	-0.160845	0.0752012					0.0522825	0.212545	0.0803345
31.53	-0.13999	0.187489	0.424539	-0.204784	0.190939	-0.158163	0.0731187					0.053307	0.21509	0.0812965
31.6283	-0.14489	0.193097	0.428572	-0.20692	0.195649	-0.15474	0.0709066					0.0545248	0.217522	0.0822155
31.7266	-0.149221	0.198875	0.432477	-0.209085	0.200579	-0.150529	0.0686822					0.0559682	0.219822	0.083085
31.8249	-0.152981	0.204833	0.436133	-0.211173	0.205735	-0.145472	0.0666194					0.0576707	0.221943	0.0838866
31.9232	-0.156198	0.210941	0.439414	-0.213234	0.210919	-0.139519	0.0647038					0.0595754	0.223844	0.0846049
32.0215	-0.158849	0.2171	0.442237	-0.215217	0.216051	-0.1329	0.062849					0.0616102	0.225508	0.0852341
32.1198	-0.160873	0.223162	0.444565	-0.217118	0.221141	-0.12584	0.0610071					0.0637206	0.226936	0.0857736
32.2181	-0.162265	0.229181	0.446358	-0.218881	0.226124	-0.118277	0.0590933					0.0659047	0.2281	0.0862137
32.3165	-0.163014	0.235226	0.447656	-0.220469	0.23083	-0.110385	0.0570209					0.0681236	0.229017	0.0865602
32.4148	-0.163043	0.241334	0.448537	-0.221889	0.235115	-0.102321	0.0548552					0.0703698	0.229702	0.0868191
32.5131	-0.162315	0.247594	0.44902	-0.223215	0.238903	-0.0941969	0.0526675					0.0726367	0.230181	0.0870001
32.6114	-0.160795	0.253939	0.449195	-0.224523	0.242119	-0.0862245	0.0505192					0.0748899	0.230489	0.0871166
32.7097	-0.158557	0.260463	0.449038	-0.225766	0.244577	-0.0784117	0.0483162					0.0770941	0.230615	0.0871642
32.808	-0.155577	0.2672	0.448475	-0.226962	0.246248	-0.0708981	0.0459674					0.0792076	0.230559	0.0871431
32.9063	-0.151874	0.274207	0.447449	-0.228153	0.24719	-0.0637203	0.0435846					0.0812405	0.230336	0.0870587
33.0046	-0.147354	0.281452	0.445921	-0.229298	0.247287	-0.0569094	0.0411193					0.083174	0.229909	0.0868974
33.1029	-0.141928	0.288845	0.443894	-0.230337	0.246528	-0.0505394	0.0387729					0.0850337	0.229251	0.0866485
33.2012	-0.135631	0.296431	0.441361	-0.231406	0.244906	-0.0445238	0.036504					0.0868058	0.228399	0.0863266
33.2995	-0.128431	0.304109	0.438322	-0.232549	0.242501	-0.0388686	0.0342717					0.0884795	0.227368	0.0859371
33.3978	-0.120335	0.311831	0.43479	-0.23378	0.239391	-0.0337779	0.0320997					0.0900314	0.226197	0.0854943
33.4961	-0.11147	0.319715	0.43079	-0.235012	0.23563	-0.0292028	0.0300629					0.091502	0.22492	0.085012
33.5944	-0.10185	0.327725	0.426282	-0.236304	0.231267	-0.0248723	0.0281026					0.0929071	0.223544	0.0844917
33.6927	-0.09154	0.335781	0.421223	-0.237704	0.226283	-0.0208021	0.0260467					0.0941839	0.222094	0.0839438
33.791	-0.0806014	0.34388	0.415673	-0.239207	0.220744	-0.017168	0.0237939					0.095302	0.220637	0.083393
33.8893	-0.0690816	0.352021	0.409754	-0.240773	0.214778	-0.0139167	0.0212792					0.0962943	0.219229	0.0828607
33.9876	-0.0569677	0.360153	0.403428	-0.242352	0.208539	-0.0111668	0.0184155					0.0971498	0.217889	0.0823544
34.0859	-0.0442655	0.368287	0.396798	-0.243907	0.202146	-0.00884068	0.0152737					0.0979274	0.216656	0.0818884
34.1842	-0.0310251	0.376489	0.389949	-0.245409	0.195598	-0.00672594	0.0118619					0.0986768	0.215565	0.0814758
34.2825	-0.0172468	0.384681	0.382923	-0.246927	0.188891	-0.00483309	0.00817987					0.099381	0.214647	0.081129
34.3808	-0.00293987	0.392793	0.3757	-0.248534	0.182131	-0.00305253	0.00433417					0.100062	0.213919	0.0808537
34.4791	0.0117332	0.400806	0.368311	-0.250166	0.175378	-0.00135554	0.000342917					0.100721	0.213396	0.0806561
34.5774	0.0267474	0.408674	0.360755	-0.2518	0.168699	0.000270254	-0.00384222					0.101358	0.213085	0.0805387
34.6757	0.0420342	0.416353	0.35308	-0.253394	0.162244	0.00179942	-0.00824437					0.101982	0.213	0.0805065
34.774	0.0575332	0.423769	0.345326	-0.254923	0.156121	0.00318323	-0.0126995					0.102616	0.213127	0.0805544
34.8724	0.0731918	0.430853	0.337482	-0.256276	0.150348	0.00453964	-0.0171908					0.103278	0.213414	0.0806629
34.9707	0.0889842	0.437555	0.329613	-0.25744	0.144972	0.00578075	-0.0217871					0.103954	0.213867	0.080834
35.069	0.104826	0.443807	0.321759	-0.258485	0.140191	0.00690973	-0.0263901					0.10466	0.214482	0.0810666
35.1673	0.120583	0.449666	0.313987	-0.259338	0.136023	0.00796086	-0.0311666					0.105388	0.215266	0.0813628
35.2656	0.136154	0.455118	0.306307	-0.259903	0.132438	0.00886662	-0.0362262					0.106108	0.216189	0.0817117
35.3639	0.151565	0.460254	0.298758	-0.260127	0.129355	0.00967589	-0.0414784					0.106858	0.217238	0.0821082
35.4622	0.166722	0.46516	0.291335	-0.260004	0.126682	0.0104674	-0.0469103					0.107636	0.218406	0.0825497
35.5605	0.181637	0.469745	0.28415	-0.259567	0.124364	0.0110051	-0.0525975					0.108391	0.219702	0.0830396
35.6588	0.196251	0.47402	0.277257	-0.258733	0.122422	0.0110802	-0.0585011					0.109114	0.221106	0.0835703
35.7571	0.210637	0.477938	0.27067	-0.257453	0.120873	0.0106186	-0.0644756					0.10983	0.222576	0.0841257
35.8554	0.224789	0.481518	0.264278	-0.255726	0.119522	0.00974477	-0.0705002					0.110518	0.224079	0.0846939
35.9537	0.238703	0.484655	0.258041	-0.253592	0.118285	0.00834696	-0.0766306					0.111115	0.225601	0.0852692
36.052	0.252331	0.487359	0.252022	-0.251017	0.117144	0.00654482	-0.082686					0.111671	0.227101	0.0858361
36.1503	0.265643	0.489653	0.246138	-0.248079	0.116007	0.00431489	-0.088673					0.112143	0.228585	0.0863972
36.2486	0.278671	0.491508	0.240319	-0.24478	0.114844	0.00140538	-0.0945719					0.112485	0.230054	0.0869521
36.3469	0.291332	0.493018	0.234588	-0.241068	0.113672	-0.00231965	-0.100333					0.112699	0.231508	0.0875019
36.4452	0.303592	0.494244	0.229019	-0.236938	0.112477	-0.00698589	-0.106003					0.112772	0.232977	0.0880571
36.5435	0.315468	0.495167	0.223485	-0.232481	0.111211	-0.0124807	-0.111612					0.11268	0.234462	0.0886184
36.6418	0.326879	0.495708	0.217936	-0.227681	0.109858	-0.0187744	-0.117175					0.112393	0.235929	0.0891728
36.7401	0.337813	0.495901	0.212259	-0.222553	0.108275	-0.0258387	-0.122728					0.111875	0.237384	0.0897228
36.8384	0.348291	0.495727	0.206499	-0.217108	0.106462	-0.0335027	-0.128429					0.111134	0.238844	0.0902745
36.9367	0.358279	0.495284	0.200693	-0.211377	0.104485	-0.0418224	-0.134347					0.110171	0.240351	0.0908441
37.035	0.367773	0.494633	0.194797	-0.205344	0.102255	-0.0506532	-0.140462					0.109	0.241902	0.0914303
37.1333	0.376734	0.493822	0.188873	-0.198974	0.0997384	-0.0598755	-0.146819					0.107643	0.243496	0.0920329
37.2316	0.385196	0.492882	0.182909	-0.19239	0.0969862	-0.0694951	-0.153231					0.106123	0.245141	0.0926547
37.33	0.39316	0.491807	0.176878	-0.185622	0.094072	-0.0795347	-0.159562					0.104457	0.246822	0.0932898
37.4283	0.400463	0.490587	0.170718	-0.178699	0.0909395	-0.0899624	-0.165847					0.1026	0.248511	0.0939284
37.5266	0.40711	0.489179	0.164449	-0.171578	0.0876796	-0.100686	-0.172049					0.100586	0.250177	0.094558
37.6249	0.413091	0.487672	0.158004	-0.164291	0.0844195	-0.111487	-0.178086					0.0984746	0.251798	0.0951707
37.7232	0.418435	0.486102	0.151384	-0.156909	0.0811847	-0.122362	-0.183967					0.0962669	0.253393	0.0957736
37.8215	0.423017	0.484544	0.144579	-0.149372	0.0780357	-0.133185	-0.189753					0.0939808	0.254937	0.096357
37.9198	0.426774	0.482979	0.137682	-0.141686	0.075131	-0.143863	-0.195414					0.0916575	0.256392	0.0969069
38.0181	0.42968	0.48142	0.130742	-0.133956	0.0726417	-0.154139	-0.200819					0.0893672	0.257706	0.0974037
38.1164	0.431676	0.479916	0.123825	-0.126205	0.0706225	-0.163962	-0.206185					0.0870983	0.2589	0.097855
38.2147	0.432742	0.478434	0.11703	-0.118362	0.0691426	-0.173196	-0.211519					0.084896	0.259928	0.0982434
38.313	0.43277	0.477002	0.11039	-0.110436	0.068235	-0.181643	-0.216746					0.0827961	0.260726	0.0985451
38.4113	0.431807	0.475575	0.103924	-0.10244	0.0678448	-0.189074	-0.221902					0.0808192	0.261259	0.0987465
38.5096	0.429869	0.474102	0.0975523	-0.0943893	0.0680016	-0.195344	-0.227009					0.078969	0.261493	0.0988351
38.6079	0.427005	0.472646	0.091362	-0.086262	0.0688625	-0.200559	-0.231961					0.077299	0.261441	0.0988155
38.7062	0.423279	0.471256	0.0854996	-0.0780942	0.0704251	-0.204734	-0.236613					0.0758597	0.261106	0.0986888
38.8045	0.418736	0.469954	0.0800102	-0.0699	0.072736	-0.207859	-0.240943					0.0746763	0.260494	0.0984573
38.9028	0.413416	0.468734	0.074813	-0.0617253	0.075802	-0.210217	-0.244806					0.0737167	0.259631	0.0981314
39.0011	0.407373	0.467513	0.069924	-0.0536324	0.079576	-0.211745	-0.247985					0.0730033	0.25847	0.0976923
39.0994	0.400558	0.466289	0.0653545	-0.0456496	0.0839901	-0.212562	-0.250385					0.0725136	0.257002	0.0971376
39.1977	0.392971	0.465047	0.0609719	-0.0377948	0.0889747	-0.212791	-0.251961					0.0722026	0.255239	0.0964714
39.296	0.384669	0.463781	0.0567094	-0.0300413	0.0945281	-0.212338	-0.252803					0.0720723	0.253195	0.0956986
39.3943	0.375721	0.462548	0.0525566	-0.0223748	0.100591	-0.21112	-0.252942					0.0721399	0.25089	0.0948274
39.4926	0.366283	0.461342	0.0485701	-0.0148014	0.107337	-0.209174	-0.25232					0.0724624	0.248355	0.0938694
39.5909	0.356411	0.460154	0.0447646	-0.00741172	0.114726	-0.206557	-0.250957					0.0730186	0.245623	0.0928367
39.6892	0.346152	0.458891	0.0410583	-0.000194751	0.122628	-0.203294	-0.248892					0.0737641	0.242697	0.0917309
39.7876	0.335598	0.457543	0.0374417	0.0068255	0.131083	-0.199256	-0.246145					0.0747273	0.239584	0.0905543
39.8859	0.324894	0.456099	0.0339112	0.0134955	0.140069	-0.194504	-0.242685					0.0758971	0.236323	0.0893216
39.9842	0.314186	0.454506	0.0303753	0.0197886	0.149415	-0.189231	-0.238556					0.077212	0.232967	0.0880531
40.0825	0.303536	0.452774	0.0267903	0.0257986	0.158881	-0.183725	-0.233837					0.0786025	0.229581	0.0867734
40.1808	0.293068	0.450847	0.0230304	0.0314171	0.168314	-0.178167	-0.228345					0.0800236	0.226166	0.0854828
40.2791	0.2829	0.448762	0.0190569	0.0366063	0.177705	-0.172748	-0.222113					0.0814529	0.222786	0.0842053
40.3774	0.273088	0.446499	0.0148581	0.0413871	0.187119	-0.167538	-0.215261					0.0828787	0.219483	0.0829567
40.4757	0.263704	0.444045	0.0103642	0.0457279	0.196583	-0.162638	-0.207692					0.0842991	0.216268	0.0817415
40.574	0.254807	0.441398	0.0055904	0.0496375	0.206018	-0.158166	-0.199433					0.0856932	0.213168	0.08057
40.6723	0.246459	0.438564	0.000526295	0.0531328	0.215212	-0.154135	-0.190646					0.0870161	0.210211	0.0794523
40.7706	0.238681	0.435573	-0.0049575	0.0561968	0.224269	-0.150374	-0.18154					0.0882641	0.207436	0.0784033
40.8689	0.231446	0.432335	-0.010793	0.0588249	0.233255	-0.146797	-0.172236					0.0894337	0.204831	0.077419
40.9672	0.224756	0.428875	-0.0169056	0.0610061	0.242084	-0.143184	-0.162774					0.0905511	0.202365	0.0764869
41.0655	0.218624	0.425251	-0.023261	0.0627463	0.250721	-0.139607	-0.153381					0.0915849	0.200099	0.0756301
41.1638	0.213143	0.421402	-0.0299027	0.0640244	0.259221	-0.135955	-0.14428					0.0925218	0.198054	0.0748572
41.2621	0.208385	0.417357	-0.0367407	0.0648599	0.26764	-0.13205	-0.135611					0.0934058	0.196234	0.0741694
41.3604	0.20428	0.413104	-0.0436734	0.065272	0.275937	-0.127972	-0.127465					0.0942117	0.194638	0.0735662
41.4587	0.200818	0.408514	-0.0506096	0.0652369	0.284016	-0.123781	-0.119929					0.094895	0.193229	0.0730338
41.557	0.197998	0.403555	-0.0575503	0.0648035	0.291763	-0.119525	-0.113112					0.0954188	0.191999	0.0725687
41.6553	0.195849	0.3983	-0.0644089	0.0640544	0.2992	-0.115166	-0.107027					0.0958288	0.190941	0.0721687
41.7536	0.194431	0.392811	-0.0710759	0.0629814	0.306355	-0.110726	-0.10167					0.096158	0.190056	0.0718343
41.8519	0.193626	0.387082	-0.0775991	0.0616358	0.313093	-0.10636	-0.0969601					0.0963596	0.189318	0.0715554
41.9502	0.193281	0.381037	-0.0839718	0.0600824	0.319408	-0.101982	-0.0928027					0.096436	0.188658	0.071306
42.0485	0.193347	0.374739	-0.0900875	0.0582938	0.325423	-0.0975098	-0.0892625					0.0964204	0.188082	0.0710884
42.1468	0.19381	0.368327	-0.0959489	0.0562745	0.331242	-0.0928784	-0.0863266					0.0963571	0.187619	0.0709135
42.2452	0.194671	0.361844	-0.101494	0.054205	0.336928	-0.0878319	-0.0840651					0.0963225	0.187244	0.0707717
42.3435	0.195887	0.355257	-0.106779	0.0520702	0.342357	-0.0821758	-0.0824728					0.0963063	0.186904	0.070643
42.4418	0.197496	0.348596	-0.111737	0.0498341	0.347444	-0.0759676	-0.0814393					0.0963181	0.186576	0.0705189
42.5401	0.199418	0.341889	-0.116353	0.0475175	0.352293	-0.0691936	-0.0810561					0.0963593	0.186289	0.0704104
42.6384	0.201622	0.335187	-0.120635	0.0451381	0.356903	-0.0618552	-0.0812561					0.0964433	0.186046	0.0703187
42.7367	0.204037	0.328428	-0.124584	0.0426671	0.361289	-0.0539017	-0.0819509					0.0965692	0.185822	0.0702342
42.835	0.206658	0.321691	-0.128135	0.0401525	0.365312	-0.0455221	-0.082815					0.0967631	0.185574	0.0701405
42.9333	0.209631	0.315111	-0.131357	0.0375479	0.368912	-0.0369482	-0.0836006					0.0970423	0.185331	0.0700487
43.0316	0.212961	0.30875	-0.134271	0.0349266	0.372106	-0.0283633	-0.0844143					0.0973851	0.185139	0.0699758
43.1299	0.21664	0.302594	-0.136957	0.032282	0.374965	-0.0198161	-0.0850621					0.0978065	0.184994	0.0699211
43.2282	0.220588	0.296696	-0.139278	0.0296709	0.377423	-0.0114983	-0.085373					0.0983183	0.184843	0.0698642
43.3265	0.224813	0.291066	-0.141217	0.0270202	0.379487	-0.00353354	-0.0852223					0.0989163	0.184673	0.0697997
43.4248	0.229357	0.28574	-0.142889	0.0243325	0.381239	0.0040644	-0.0844018					0.0996346	0.18449	0.0697305
43.5231	0.234215	0.280783	-0.14431	0.0216351	0.382792	0.0112459	-0.0828334					0.100504	0.184313	0.0696639
43.6214	0.239328	0.276163	-0.14548	0.0189084	0.384114	0.0179986	-0.0804108					0.101517	0.184103	0.0695846
43.7197	0.244656	0.271799	-0.146541	0.016131	0.385202	0.0243164	-0.077107					0.102637	0.183865	0.0694943
43.818	0.250081	0.267634	-0.147517	0.013289	0.38604	0.0302269	-0.0729949					0.103823	0.183584	0.0693882
43.9163	0.25565	0.263695	-0.148318	0.0103194	0.38672	0.0358135	-0.068182					0.1051	0.183287	0.069276
44.0146	0.261447	0.260142	-0.1488	0.00720896	0.387128	0.0409623	-0.0628535					0.106462	0.182983	0.0691611
44.1129	0.267459	0.256993	-0.149037	0.00400432	0.387257	0.045614	-0.0569545					0.107905	0.182677	0.0690453
44.2112	0.273705	0.254165	-0.149005	0.000689657	0.387077	0.0498167	-0.0505504					0.109414	0.182359	0.0689251
44.3095	0.280119	0.251583	-0.148649	-0.00282342	0.386602	0.0534381	-0.0437098					0.110937	0.18203	0.0688007
44.4078	0.286661	0.249248	-0.147842	-0.00654104	0.385886	0.0562666	-0.0363733					0.112472	0.181677	0.0686675
44.5061	0.29331	0.247102	-0.146663	-0.0104649	0.384842	0.05839	-0.0287161					0.113972	0.181313	0.0685299
44.6044	0.300059	0.245133	-0.145109	-0.0145529	0.383378	0.0597162	-0.0207844					0.115406	0.180927	0.0683839
44.7028	0.306838	0.243299	-0.143117	-0.0187848	0.381466	0.0601736	-0.0126366					0.116748	0.180501	0.0682231
44.8011	0.313608	0.241609	-0.140692	-0.0230572	0.379134	0.0598576	-0.00432554					0.118019	0.180038	0.0680479
44.8994	0.320287	0.239972	-0.137877	-0.0273526	0.376381	0.0589152	0.00390149					0.119175	0.179546	0.0678621
44.9977	0.3266	0.238382	-0.134666	-0.0315377	0.373159	0.0576562	0.0117862					0.120197	0.178966	0.0676429
45.096	0.332495	0.236836	-0.131113	-0.0355937	0.369541	0.0562626	0.0193877					0.121116	0.178293	0.0673885
45.1943	0.337976	0.235379	-0.127182	-0.0394506	0.365519	0.0548789	0.0265999					0.12196	0.177509	0.0670922
45.2926	0.343076	0.233996	-0.122995	-0.0431348	0.361104	0.0537252	0.0333189					0.122727	0.176636	0.0667622
45.3909	0.34777	0.232686	-0.118562	-0.0465378	0.356205	0.0528117	0.0395187					0.123413	0.175632	0.0663827
45.4892	0.351991	0.231386	-0.113702	-0.0496317	0.350776	0.0522522	0.045017					0.124013	0.174428	0.0659275
45.5875	0.355725	0.230183	-0.108396	-0.0524472	0.344842	0.0521402	0.0497892					0.124548	0.17302	0.0653956
45.6858	0.358965	0.229173	-0.102685	-0.0549752	0.338515	0.0524338	0.0537473					0.125025	0.171446	0.0648003
45.7841	0.361624	0.228429	-0.096501	-0.0571855	0.331694	0.0530469	0.0569241					0.125433	0.169653	0.0641228
45.8824	0.363735	0.228074	-0.0899017	-0.0590479	0.32442	0.0538593	0.0595534					0.125813	0.167666	0.0633717
45.9807	0.365297	0.228109	-0.0829241	-0.0604469	0.316638	0.0549057	0.0616727					0.126179	0.165459	0.0625374
46.079	0.366377	0.228372	-0.0757545	-0.0613178	0.308509	0.0563335	0.0633942					0.126559	0.163066	0.0616332
46.1773	0.366921	0.228883	-0.0683123	-0.0615994	0.300136	0.0581718	0.0647699					0.126996	0.160466	0.0606504
46.2756	0.366842	0.229638	-0.0605843	-0.0612638	0.291545	0.0604509	0.0659169					0.127506	0.157627	0.0595773
46.3739	0.366213	0.230673	-0.0526843	-0.0603305	0.282785	0.0631217	0.066992					0.12811	0.154593	0.0584305
46.4722	0.364992	0.232074	-0.0447837	-0.0587618	0.274032	0.0662184	0.0679463					0.128817	0.15141	0.0572275
46.5705	0.363178	0.233859	-0.0368111	-0.0565791	0.265471	0.0696536	0.0689441					0.129674	0.148091	0.0559733
46.6688	0.36079	0.236037	-0.0287647	-0.0538489	0.257131	0.0734513	0.0701303					0.130704	0.144645	0.0546707
46.7671	0.357798	0.238648	-0.0206813	-0.0506197	0.249142	0.0777807	0.0714624					0.131933	0.141091	0.0533274
46.8654	0.354327	0.241736	-0.0125627	-0.0469966	0.241617	0.0824534	0.0728643					0.133348	0.137511	0.0519742
46.9637	0.350538	0.245325	-0.00437346	-0.0430447	0.234586	0.0872525	0.0743275					0.134944	0.133968	0.050635
47.062	0.346611	0.249398	0.00386463	-0.0388246	0.22814	0.0919303	0.0760391					0.136737	0.130528	0.0493349
47.1604	0.342578	0.253855	0.0122192	-0.0344099	0.222218	0.0963762	0.0779753					0.138687	0.127192	0.0480742
47.2587	0.33834	0.258592	0.0207041	-0.0298907	0.216823	0.100428	0.080071					0.140724	0.123954	0.0468503
47.357	0.333964	0.263625	0.0293816	-0.0253059	0.212156	0.103911	0.0823931					0.142875	0.120852	0.0456779
47.4553	0.329442	0.268895	0.0382149	-0.0207434	0.208293	0.106758	0.0848914					0.145107	0.117913	0.0445669
47.5536	0.324878	0.27447	0.0471009	-0.0162374	0.205119	0.108797	0.0875967					0.147389	0.11519	0.0435375
47.6519	0.320277	0.280207	0.0559452	-0.0118053	0.20259	0.110005	0.0904759					0.149671	0.112684	0.0425904
47.7502	0.315682	0.286073	0.0647276	-0.00748135	0.200667	0.110493	0.0935441					0.151958	0.110406	0.0417296
47.8485	0.311235	0.291949	0.0734237	-0.00333282	0.199496	0.1103	0.0965346					0.154229	0.108417	0.040978
47.9468	0.306904	0.297714	0.0821393	0.000672453	0.199058	0.109492	0.0991297					0.156444	0.106695	0.0403269
48.0451	0.302672	0.303336	0.090751	0.00447624	0.19928	0.108029	0.101349					0.158556	0.105257	0.0397833
48.1434	0.298348	0.308945	0.0992802	0.00803784	0.200077	0.105791	0.103194					0.160525	0.104111	0.0393504
48.2417	0.29402	0.314459	0.107568	0.011265	0.201298	0.102834	0.104586					0.16229	0.103301	0.0390441
48.34	0.289767	0.319851	0.115571	0.0141499	0.202907	0.0990132	0.105387					0.163807	0.102873	0.0388822
48.4383	0.285529	0.325197	0.123389	0.0167409	0.204783	0.0943988	0.105483					0.165074	0.102826	0.0388645
48.5366	0.28138	0.330442	0.131086	0.0190146	0.206664	0.089189	0.104908					0.166098	0.103139	0.0389828
48.6349	0.277309	0.335701	0.13859	0.0210218	0.208479	0.0834745	0.103566					0.166877	0.103831	0.0392443
48.7332	0.27334	0.340985	0.14589	0.022787	0.210213	0.0772875	0.101296					0.1674	0.104918	0.0396551
48.8315	0.269654	0.34626	0.152972	0.0243608	0.211804	0.0705947	0.0982521					0.1677	0.106395	0.0402134
48.9298	0.266164	0.35147	0.159804	0.0257958	0.21309	0.0635475	0.0945645					0.167776	0.108181	0.0408887
49.0281	0.262756	0.356545	0.166271	0.0271815	0.214111	0.0564214	0.0902555					0.167649	0.110182	0.0416447
49.1264	0.259399	0.361313	0.17235	0.0284625	0.214857	0.0493763	0.0852215					0.167283	0.112332	0.0424575
49.2247	0.25613	0.365767	0.177992	0.0296385	0.215393	0.0424894	0.0795074					0.166703	0.114605	0.0433168
49.323	0.253043	0.370005	0.183172	0.0307741	0.215703	0.0358961	0.0732523					0.165978	0.116971	0.0442107
49.4213	0.250021	0.373982	0.187806	0.0319251	0.215603	0.0296863	0.0664321					0.165065	0.119354	0.0451114
49.5196	0.247049	0.377725	0.191823	0.0331599	0.215084	0.0239088	0.0592074					0.163994	0.121705	0.0460003
49.618	0.244093	0.381131	0.195112	0.0344676	0.214329	0.0187761	0.0517352					0.162806	0.123938	0.046844
49.7163	0.241188	0.384319	0.197671	0.035877	0.213427	0.0143202	0.0442026					0.161572	0.126041	0.0476392
49.8146	0.238328	0.387287	0.199539	0.0374025	0.212365	0.01044	0.036681					0.160292	0.12801	0.0483831
49.9129	0.235423	0.390097	0.200751	0.0390407	0.211123	0.00707694	0.0294812					0.158999	0.129809	0.0490631
50.0112	0.232621	0.392766	0.20119	0.040708	0.209775	0.00420599	0.0227897					0.157722	0.131432	0.0496767
50.1095	0.229963	0.3953	0.201037	0.0423821	0.208445	0.00183454	0.0165379					0.1565	0.1329	0.0502316
50.2078	0.227625	0.397618	0.200392	0.0440557	0.207201	7.23638e-05	0.0106374					0.155372	0.134204	0.0507242
50.3061	0.225573	0.39972	0.199389	0.0457282	0.206123	-0.0011066	0.00518397					0.154373	0.135332	0.0511508
50.4044	0.223768	0.40158	0.198037	0.0473056	0.205236	-0.00158694	0.000269515					0.153516	0.136251	0.051498
50.5027	0.222207	0.403125	0.196187	0.0487804	0.204646	-0.00151517	-0.00407499					0.152765	0.136953	0.0517635
50.601	0.220859	0.404227	0.193814	0.0502066	0.204473	-0.00106612	-0.0078346					0.152097	0.137425	0.0519419
50.6993	0.219792	0.404706	0.190965	0.0515434	0.204613	-0.000168938	-0.0109095					0.151506	0.137595	0.0520061
50.7976	0.219018	0.404525	0.187668	0.0528106	0.205086	0.00122238	-0.0132097					0.151017	0.137431	0.0519439
50.8959	0.218397	0.40373	0.183922	0.0539821	0.205946	0.00309664	-0.0148423					0.150605	0.136961	0.0517664
50.9942	0.217901	0.402345	0.179748	0.0550071	0.207309	0.00523229	-0.0158371					0.150244	0.136246	0.0514962
51.0925	0.217499	0.40045	0.175262	0.0558175	0.209135	0.00739087	-0.0161226					0.149919	0.135341	0.0511541
51.1908	0.2172	0.398239	0.170525	0.0564192	0.211325	0.00959418	-0.0156122					0.14967	0.13428	0.0507531
51.2891	0.216964	0.39582	0.165565	0.056847	0.213796	0.0118021	-0.0143189					0.149496	0.133094	0.050305
51.3874	0.216785	0.393191	0.160399	0.0571031	0.216525	0.0139957	-0.0122808					0.149388	0.131798	0.049815
51.4857	0.216771	0.390361	0.155149	0.0571969	0.219507	0.0162225	-0.00948587					0.149389	0.130401	0.0492871
51.584	0.216883	0.387405	0.149914	0.0571132	0.222751	0.0186394	-0.00613794					0.14951	0.128945	0.0487367
51.6823	0.2171	0.384412	0.144778	0.0568709	0.226116	0.0211902	-0.00255243					0.149702	0.127509	0.0481937
51.7806	0.217413	0.38126	0.139812	0.0565231	0.229447	0.0237978	0.0010817					0.149905	0.126085	0.0476558
51.8789	0.217828	0.377873	0.135046	0.0560395	0.232744	0.0265241	0.00477744					0.150119	0.124649	0.0471128
51.9772	0.218399	0.374261	0.130434	0.0554991	0.235864	0.0294604	0.00843039					0.150335	0.123189	0.046561
52.0755	0.219015	0.3704	0.126113	0.0549479	0.238788	0.03276	0.0119925					0.150574	0.121665	0.0459851
52.1739	0.219654	0.366245	0.122003	0.0543859	0.241456	0.0364093	0.0154934					0.150807	0.120056	0.0453769
52.2722	0.220298	0.361812	0.117986	0.0538426	0.243755	0.0402996	0.0190452					0.151006	0.118348	0.0447313
52.3705	0.220897	0.357185	0.114009	0.053351	0.245664	0.0443885	0.0225651					0.151151	0.116572	0.0440603
52.4688	0.221523	0.352433	0.110051	0.0529743	0.247161	0.0486293	0.0260425					0.151259	0.114751	0.0433719
52.5671	0.222224	0.34749	0.106252	0.0526502	0.248234	0.053195	0.0294531					0.151357	0.112852	0.0426541
52.6654	0.223038	0.342544	0.102713	0.0523342	0.248951	0.05817	0.0327591					0.151501	0.110929	0.0419271
52.7637	0.223896	0.337719	0.0994035	0.0520714	0.249454	0.0634189	0.0359158					0.151697	0.109042	0.0412141
52.862	0.224731	0.333048	0.0962897	0.0518242	0.249711	0.0689142	0.0389451					0.151923	0.107198	0.0405168
52.9603	0.225614	0.328484	0.0934078	0.0515683	0.249635	0.0747387	0.0418843					0.15219	0.105365	0.0398242
53.0586	0.22662	0.324048	0.0908625	0.0513099	0.24929	0.0810835	0.0447981					0.152573	0.10353	0.0391307
53.1569	0.227869	0.319689	0.0886992	0.0510727	0.248632	0.0880769	0.0476109					0.153093	0.101687	0.0384341
53.2552	0.229351	0.315379	0.086949	0.0509429	0.247875	0.0955649	0.0502629					0.153761	0.0998754	0.0377494
53.3535	0.231028	0.311086	0.0855871	0.0509216	0.247072	0.10359	0.0528015					0.154584	0.0980941	0.0370761
53.4518	0.232865	0.306748	0.0845588	0.0509594	0.246219	0.112098	0.0551641					0.155516	0.0963651	0.0364226
53.5501	0.234779	0.302388	0.0837745	0.0510324	0.245459	0.120935	0.0572723					0.15652	0.094754	0.0358136
53.6484	0.236839	0.297893	0.08321	0.0510599	0.244813	0.129887	0.0591688					0.157553	0.0932803	0.0352566
53.7467	0.239028	0.293282	0.0829306	0.051033	0.244346	0.138805	0.0611369					0.158652	0.0919221	0.0347433
53.845	0.241279	0.288669	0.0828851	0.0509011	0.244176	0.147735	0.0632201					0.159838	0.090722	0.0342897
53.9433	0.243557	0.284245	0.0830637	0.0507031	0.244338	0.156642	0.0653558					0.161129	0.0897268	0.0339135
54.0416	0.245856	0.280048	0.0835124	0.0503732	0.244978	0.165379	0.0675509					0.162528	0.088965	0.0336256
54.1399	0.24814	0.27621	0.0841806	0.0499597	0.246038	0.173848	0.0699388					0.164045	0.0884158	0.033418
54.2382	0.250348	0.27285	0.0851035	0.0494799	0.247598	0.182019	0.0725733					0.16571	0.088071	0.0332877
54.3365	0.252399	0.269988	0.0863057	0.0489076	0.249735	0.189919	0.075366					0.167517	0.0879303	0.0332345
54.4348	0.254389	0.267615	0.0878178	0.0482665	0.252446	0.197595	0.0783219					0.169493	0.0879814	0.0332538
54.5331	0.256288	0.265751	0.0897571	0.0475701	0.255808	0.205107	0.0813784					0.171666	0.0882139	0.0333417
54.6315	0.25809	0.264615	0.0921919	0.0469032	0.259799	0.212355	0.0845201					0.174068	0.0886144	0.0334931
54.7298	0.25977	0.264104	0.0950854	0.0462962	0.26433	0.219339	0.0876354					0.176651	0.0891514	0.0336961
54.8281	0.261329	0.264214	0.0984224	0.0457027	0.269343	0.226065	0.0907773					0.179408	0.0898089	0.0339446
54.9264	0.262863	0.264944	0.10225	0.0452147	0.274792	0.232506	0.0938784					0.18235	0.0905652	0.0342304
55.0247	0.26425	0.266313	0.106607	0.0448912	0.28071	0.238475	0.0969388					0.185455	0.0913718	0.0345353
55.123	0.265469	0.268283	0.11133	0.0447366	0.287031	0.243879	0.0999242					0.188665	0.0922213	0.0348564
55.2213	0.266404	0.270863	0.11627	0.044739	0.293815	0.248635	0.10288					0.191944	0.0931146	0.035194
55.3196	0.26702	0.274012	0.121375	0.0448722	0.300925	0.252785	0.105849					0.195263	0.094033	0.0355411
55.4179	0.267349	0.277735	0.126649	0.0451172	0.308342	0.256183	0.108777					0.198593	0.0949813	0.0358995
55.5162	0.267511	0.28208	0.13218	0.0454746	0.316091	0.258871	0.111685					0.201985	0.0959816	0.0362776
55.6145	0.267559	0.28714	0.138026	0.0458968	0.324046	0.260972	0.11469					0.205476	0.0970414	0.0366782
55.7128	0.267474	0.293022	0.144248	0.0464686	0.332133	0.262602	0.117844					0.209113	0.098149	0.0370968
55.8111	0.267334	0.299631	0.15071	0.04721	0.34031	0.263722	0.120952					0.212839	0.0993383	0.0375463
55.9094	0.267223	0.306863	0.157409	0.0481214	0.348382	0.264362	0.124024					0.216626	0.100582	0.0380163
56.0077	0.26719	0.314526	0.164298	0.0491635	0.356349	0.26469	0.127046					0.220466	0.101894	0.0385124
56.106	0.267174	0.322577	0.171331	0.0503527	0.364142	0.264834	0.129943					0.224336	0.103276	0.0390347
56.2043	0.267228	0.330883	0.178505	0.0516319	0.371705	0.264729	0.132454					0.228162	0.10475	0.0395918
56.3026	0.267458	0.3393	0.185779	0.0529542	0.378945	0.264356	0.134553					0.231906	0.106301	0.0401781
56.4009	0.267911	0.347791	0.193196	0.0543267	0.385849	0.263596	0.13629					0.235566	0.107909	0.0407856
56.4992	0.268507	0.35627	0.200709	0.0557093	0.392408	0.262434	0.137714					0.239107	0.109562	0.0414104
56.5975	0.269182	0.364609	0.208141	0.0570938	0.398524	0.260763	0.138925					0.242463	0.111216	0.0420358
56.6958	0.269847	0.372616	0.215326	0.0584082	0.404161	0.2585	0.14004					0.245557	0.11284	0.0426493
56.7941	0.270492	0.38032	0.222275	0.0595749	0.409358	0.255602	0.141209					0.248404	0.114441	0.0432547
56.8924	0.271106	0.387685	0.229062	0.0606579	0.414087	0.252208	0.14233					0.251019	0.116009	0.0438472
56.9907	0.271536	0.394676	0.235653	0.0615377	0.418527	0.248406	0.143406					0.253392	0.117598	0.0444477
57.0891	0.271877	0.401277	0.241878	0.0621853	0.422589	0.244201	0.14448					0.255498	0.119192	0.0450504
57.1874	0.272102	0.407514	0.247796	0.0626244	0.426257	0.239698	0.145549					0.257363	0.120781	0.0456511
57.2857	0.272253	0.413426	0.253484	0.0628097	0.429536	0.234967	0.146601					0.259011	0.12238	0.0462552
57.384	0.272401	0.418982	0.258986	0.0626938	0.432312	0.230073	0.147648					0.260442	0.123964	0.0468538
57.4823	0.272578	0.424151	0.264314	0.0623345	0.434705	0.225353	0.14867					0.261729	0.125522	0.0474427
57.5806	0.272646	0.428883	0.26937	0.0617436	0.436734	0.220802	0.149724					0.262843	0.127027	0.0480116
57.6789	0.272561	0.432981	0.274091	0.0609865	0.43834	0.216358	0.150753					0.263724	0.128415	0.0485363
57.7772	0.272321	0.436346	0.278401	0.0600492	0.43961	0.212044	0.151843					0.264374	0.129666	0.0490091
57.8755	0.271818	0.439006	0.282377	0.0588922	0.440599	0.20806	0.153176					0.264847	0.130761	0.0494229
57.9738	0.271052	0.44101	0.285999	0.0575531	0.441491	0.204322	0.154578					0.265144	0.131755	0.0497986
58.0721	0.270016	0.442404	0.289268	0.0561129	0.44225	0.200664	0.156044					0.265251	0.132637	0.050132
58.1704	0.268783	0.443192	0.292166	0.054561	0.442952	0.197109	0.157691					0.265208	0.133406	0.0504228
58.2687	0.267316	0.443379	0.294569	0.0528457	0.443586	0.193768	0.159706					0.265024	0.134037	0.0506613
58.367	0.265596	0.443026	0.296477	0.0509883	0.444252	0.190724	0.162105					0.264738	0.134547	0.050854
58.4653	0.263678	0.442103	0.297912	0.0489873	0.444964	0.188201	0.164875					0.264389	0.134918	0.0509941
58.5636	0.26167	0.440645	0.298949	0.0468606	0.445704	0.186187	0.168075					0.264013	0.135147	0.0510807
58.6619	0.259689	0.438787	0.299694	0.0446569	0.446467	0.184725	0.171766					0.263684	0.135246	0.0511181
58.7602	0.257893	0.436554	0.300178	0.0424254	0.447272	0.184047	0.175787					0.263451	0.135213	0.0511055
58.8585	0.256342	0.434	0.300353	0.0402332	0.448037	0.184025	0.180118					0.263301	0.13504	0.0510402
58.9568	0.255078	0.431075	0.300144	0.0380498	0.448724	0.184468	0.184779					0.263188	0.134734	0.0509247
59.0551	0.254221	0.427829	0.299546	0.0359615	0.449218	0.185333	0.189857					0.263138	0.134263	0.0507468
59.1534	0.253812	0.424344	0.298633	0.0339564	0.449556	0.186654	0.195192					0.263164	0.133672	0.0505231
59.2517	0.253939	0.420626	0.297397	0.0320766	0.449614	0.188328	0.200746					0.263247	0.132941	0.0502469
59.35	0.254596	0.41663	0.295834	0.0304286	0.449381	0.190239	0.206555					0.26338	0.132048	0.0499096
59.4483	0.25572	0.412423	0.293888	0.0290517	0.44895	0.192397	0.212523					0.263565	0.131026	0.049523
59.5467	0.257257	0.407988	0.29152	0.0279201	0.448191	0.194484	0.218715					0.263725	0.129878	0.0490893
59.645	0.259182	0.403275	0.288742	0.0270732	0.446998	0.196481	0.225078					0.263833	0.12858	0.0485985
59.7433	0.261506	0.398403	0.285583	0.026464	0.445402	0.198409	0.231597					0.263909	0.127177	0.0480685
59.8416	0.264217	0.393403	0.28209	0.0260926	0.443303	0.200185	0.238047					0.263906	0.12568	0.0475025
59.9399	0.267346	0.388319	0.278279	0.0259662	0.440701	0.201733	0.244308					0.263807	0.124107	0.0469081
60.0382	0.270903	0.383164	0.2742	0.0260405	0.43759	0.203171	0.250634					0.263672	0.122468	0.0462884
60.1365	0.274793	0.378013	0.269905	0.0262577	0.433882	0.204574	0.257042					0.263495	0.120777	0.0456494
60.2348	0.279012	0.372874	0.265417	0.0266539	0.429452	0.205875	0.263488					0.263253	0.119022	0.044986
60.3331	0.283661	0.367854	0.260816	0.0273167	0.424434	0.207024	0.269912					0.263003	0.117239	0.0443121
60.4314	0.288703	0.362976	0.256144	0.0283208	0.418731	0.20801	0.276298					0.262741	0.115406	0.0436194
60.5297	0.294026	0.358345	0.251324	0.0296987	0.41235	0.208709	0.282613					0.262438	0.11355	0.0429177
60.628	0.299499	0.353971	0.246273	0.0314474	0.405352	0.2092	0.288708					0.262064	0.111687	0.0422136
60.7263	0.30499	0.349761	0.24094	0.033531	0.397833	0.209502	0.29441					0.261567	0.109836	0.0415141
60.8246	0.310348	0.345755	0.235418	0.035906	0.389806	0.209637	0.299876					0.260964	0.108022	0.0408284
60.9229	0.315509	0.341848	0.229805	0.0385306	0.381379	0.209792	0.304987					0.260264	0.106246	0.0401573
61.0212	0.320457	0.338113	0.224117	0.0414574	0.372646	0.210136	0.309783					0.25953	0.104511	0.0395013
61.1195	0.325177	0.334514	0.218331	0.0446373	0.363665	0.210653	0.314219					0.258742	0.102837	0.0388687
61.2178	0.32964	0.330904	0.212513	0.0480956	0.354533	0.211337	0.318428					0.257921	0.101224	0.038259
61.3161	0.333726	0.327247	0.206711	0.0518013	0.345504	0.212332	0.322398					0.257103	0.0996867	0.037678
61.4144	0.337438	0.323543	0.200953	0.0556686	0.336635	0.213882	0.326035					0.256308	0.0982252	0.0371256
61.5127	0.340894	0.319775	0.195319	0.059692	0.327953	0.21589	0.329382					0.255558	0.0968524	0.0366068
61.611	0.344196	0.316044	0.189942	0.0638434	0.319412	0.2184	0.332441					0.254897	0.0955744	0.0361237
61.7093	0.34747	0.312443	0.184919	0.068103	0.311141	0.221453	0.335255					0.254398	0.0944213	0.0356879
61.8076	0.350712	0.309014	0.180225	0.072511	0.303223	0.225009	0.337886					0.254083	0.0933971	0.0353008
61.9059	0.353966	0.305806	0.175781	0.0770207	0.295719	0.228982	0.340472					0.253964	0.0925515	0.0349812
62.0043	0.357323	0.302796	0.171586	0.0816813	0.288568	0.233337	0.34311					0.254057	0.0918888	0.0347307
62.1026	0.360693	0.29998	0.167706	0.0864957	0.281752	0.237964	0.345764					0.254336	0.0913776	0.0345375
62.2009	0.364194	0.297292	0.164141	0.0914695	0.275365	0.242744	0.34844					0.254806	0.0910298	0.034406
62.2992	0.367786	0.294696	0.160978	0.0966517	0.269528	0.247641	0.351056					0.255477	0.090791	0.0343158
62.3975	0.371298	0.29211	0.158254	0.10207	0.264238	0.252597	0.353578					0.256306	0.0905904	0.03424
62.4958	0.374686	0.289485	0.155953	0.107693	0.259496	0.257453	0.355965					0.257247	0.0904025	0.0341689
62.5941	0.377996	0.286844	0.154115	0.11351	0.255264	0.262264	0.358233					0.258318	0.0902158	0.0340984
62.6924	0.381246	0.284235	0.15281	0.119502	0.251476	0.266903	0.360396					0.25951	0.0900122	0.0340214
62.7907	0.384473	0.281692	0.152089	0.125674	0.248064	0.271324	0.362437					0.260822	0.089771	0.0339302
62.889	0.387731	0.279245	0.151906	0.132109	0.245065	0.275323	0.364279					0.262237	0.0894611	0.0338131
62.9873	0.390912	0.276973	0.152136	0.138823	0.242392	0.278748	0.366146					0.263733	0.089103	0.0336778
63.0856	0.393956	0.274896	0.152836	0.145722	0.23997	0.281462	0.367975					0.26526	0.08867	0.0335141
63.1839	0.396845	0.273007	0.154095	0.152857	0.237714	0.283415	0.369716					0.266807	0.0881149	0.0333043
63.2822	0.399552	0.271442	0.155952	0.160238	0.235573	0.28459	0.371335					0.268383	0.0874145	0.0330396
63.3805	0.402135	0.270203	0.158366	0.167874	0.233287	0.284868	0.372816					0.269936	0.0865955	0.03273
63.4788	0.404582	0.269392	0.161294	0.175815	0.230788	0.284034	0.374243					0.27145	0.0856795	0.0323838
63.5771	0.406679	0.269014	0.164647	0.184048	0.228033	0.282159	0.37557					0.272879	0.084655	0.0319966
63.6754	0.408265	0.268973	0.168299	0.1926	0.225091	0.279376	0.376613					0.274174	0.0834961	0.0315585
63.7737	0.409236	0.269299	0.172164	0.201486	0.221922	0.275587	0.377356					0.275293	0.0822238	0.0310777
63.872	0.409578	0.269851	0.176293	0.21069	0.218574	0.270891	0.377704					0.276226	0.0808483	0.0305578
63.9703	0.409268	0.27058	0.18077	0.220259	0.215074	0.265426	0.377661					0.277005	0.0793881	0.0300059
64.0686	0.408215	0.271468	0.185586	0.230158	0.211495	0.259216	0.377116					0.277608	0.0778518	0.0294252
64.1669	0.406437	0.272455	0.190711	0.240399	0.20786	0.252293	0.375963					0.278017	0.0762864	0.0288336
64.2652	0.403836	0.273561	0.196097	0.250974	0.204178	0.244786	0.374265					0.278243	0.0747492	0.0282525
64.3635	0.400425	0.274842	0.20167	0.261764	0.200419	0.236929	0.372162					0.278316	0.0733477	0.0277228
64.4619	0.396319	0.276273	0.207478	0.272658	0.196538	0.22869	0.369746					0.278243	0.0721988	0.0272886
64.5602	0.391571	0.277925	0.213508	0.283587	0.192525	0.220216	0.367087					0.27806	0.0713846	0.0269808
64.6585	0.386258	0.279725	0.219812	0.294487	0.188441	0.21148	0.364256					0.27778	0.0709789	0.0268275
64.7568	0.380446	0.281635	0.226358	0.305406	0.184326	0.202556	0.361368					0.277442	0.0710543	0.026856
64.8551	0.37423	0.283662	0.233154	0.316295	0.180237	0.193524	0.358552					0.277093	0.0716605	0.0270851
64.9534	0.367631	0.285728	0.240097	0.327089	0.176188	0.18449	0.355828					0.276722	0.0727965	0.0275145
65.0517	0.36079	0.287811	0.247179	0.337784	0.172248	0.175521	0.353034					0.276338	0.0744222	0.0281289
65.15	0.353838	0.289837	0.254325	0.348374	0.168472	0.166651	0.350226					0.27596	0.0765198	0.0289218
65.2483	0.346763	0.291826	0.261452	0.358766	0.164901	0.157899	0.347452					0.27558	0.0790249	0.0298686
65.3466	0.33953	0.293662	0.268469	0.368902	0.161486	0.149368	0.344741					0.275166	0.081858	0.0309394
65.4449	0.332132	0.295412	0.275365	0.378713	0.158424	0.14106	0.342142					0.27475	0.0849157	0.0320951
65.5432	0.324551	0.296898	0.282105	0.388121	0.15564	0.13301	0.339683					0.274287	0.0881315	0.0333106
65.6415	0.316972	0.298031	0.288716	0.397071	0.153081	0.125225	0.337495					0.273799	0.091475	0.0345743
65.7398	0.30952	0.298868	0.295209	0.405494	0.150813	0.117616	0.335796					0.273331	0.0949187	0.0358759
65.8381	0.302229	0.299411	0.301565	0.413365	0.148843	0.110217	0.334581					0.272887	0.0983983	0.0371911
65.9364	0.295159	0.299769	0.307714	0.420697	0.147138	0.102925	0.334001					0.272486	0.10192	0.038522
66.0347	0.288254	0.299976	0.313639	0.427448	0.145618	0.0956251	0.334038					0.272085	0.105474	0.0398655
66.133	0.281551	0.300055	0.319321	0.433618	0.144169	0.0883998	0.334763					0.271697	0.109039	0.0412128
66.2313	0.275054	0.300134	0.324658	0.439178	0.142755	0.081347	0.336236					0.271337	0.112566	0.0425461
66.3296	0.268815	0.300251	0.329643	0.444124	0.141296	0.0743696	0.338282					0.270969	0.116057	0.0438655
66.4279	0.262845	0.300391	0.334208	0.448518	0.139702	0.0673257	0.340781					0.270539	0.11954	0.0451818
66.5262	0.257083	0.300611	0.338175	0.452384	0.137918	0.0603821	0.343702					0.270036	0.122959	0.0464742
66.6245	0.251514	0.300837	0.341493	0.455753	0.136027	0.0535871	0.346975					0.269455	0.126273	0.0477268
66.7228	0.246066	0.301012	0.344061	0.458678	0.134023	0.0468732	0.350512					0.268746	0.129486	0.0489409
66.8211	0.240687	0.30106	0.345846	0.461097	0.131868	0.0402201	0.354263					0.267863	0.13258	0.0501106
66.9195	0.235246	0.301044	0.3468	0.463041	0.129522	0.0336553	0.358178					0.266784	0.135557	0.0512358
67.0178	0.229688	0.301083	0.347038	0.464508	0.126913	0.0271168	0.362163					0.265501	0.13845	0.052329
67.1161	0.224008	0.30112	0.346646	0.465517	0.123982	0.0207161	0.366141					0.264019	0.14124	0.0533838
67.2144	0.218128	0.30123	0.345637	0.466134	0.120741	0.0145519	0.370095					0.262359	0.143924	0.054398
67.3127	0.212082	0.301435	0.343973	0.466354	0.117126	0.00876391	0.374057					0.260541	0.146476	0.0553626
67.411	0.205996	0.301858	0.341625	0.466158	0.113116	0.00336355	0.377966					0.258583	0.148887	0.056274
67.5093	0.199899	0.302447	0.338606	0.465556	0.108605	-0.00161133	0.381796					0.256471	0.151164	0.0571347
67.6076	0.193874	0.303288	0.334992	0.464634	0.103782	-0.00609301	0.385478					0.254279	0.153283	0.0579356
67.7059	0.187913	0.304531	0.330733	0.463491	0.098874	-0.0101382	0.388995					0.252057	0.155253	0.0586803
67.8042	0.18201	0.306115	0.325879	0.462137	0.0937052	-0.0137785	0.392248					0.249759	0.157104	0.0593798
67.9025	0.176284	0.307925	0.320514	0.460562	0.0882379	-0.0169093	0.395151					0.247395	0.158802	0.0600216
68.0008	0.170804	0.309907	0.314701	0.458731	0.0825028	-0.0193944	0.397634					0.244984	0.160296	0.0605862
68.0991	0.165692	0.311978	0.308368	0.456677	0.0765504	-0.0211107	0.399684					0.242548	0.161543	0.0610577
68.1974	0.160983	0.31415	0.301472	0.45441	0.0704933	-0.0221479	0.401244					0.240086	0.162545	0.0614362
68.2957	0.156778	0.316318	0.294041	0.451931	0.0644098	-0.0225339	0.402322					0.237609	0.163292	0.0617186
68.394	0.153175	0.318455	0.286138	0.449242	0.0583858	-0.0222098	0.403051					0.235177	0.163779	0.0619027
68.4923	0.150189	0.320515	0.277864	0.4463	0.0525519	-0.0213205	0.403453					0.232793	0.164021	0.0619942
68.5906	0.147924	0.322458	0.269326	0.443141	0.0470666	-0.020021	0.403521					0.230488	0.164031	0.061998
68.6889	0.146466	0.324329	0.260586	0.439747	0.0419282	-0.0184065	0.403324					0.228282	0.163839	0.0619253
68.7872	0.14583	0.32616	0.251648	0.436088	0.0371187	-0.0163303	0.402906					0.226203	0.163423	0.0617682
68.8855	0.146049	0.328096	0.242535	0.432145	0.0326384	-0.013649	0.402266					0.224297	0.162768	0.0615206
68.9838	0.147205	0.329979	0.233309	0.427934	0.0285349	-0.0103506	0.40144					0.222579	0.161865	0.0611793
69.0821	0.149397	0.331684	0.223879	0.42341	0.0247753	-0.0063014	0.400513					0.221051	0.160691	0.0607354
69.1804	0.152685	0.333288	0.2142	0.418547	0.0214457	-0.00148737	0.399635					0.219759	0.15927	0.0601985
69.2787	0.157067	0.334722	0.204258	0.413264	0.0185892	0.00394023	0.398725					0.218652	0.157616	0.0595731
69.377	0.162502	0.335945	0.194109	0.407676	0.0162506	0.0098014	0.397696					0.217711	0.155783	0.0588805
69.4754	0.168919	0.336839	0.183822	0.401892	0.0146606	0.0160678	0.396596					0.216971	0.153776	0.0581218
69.5737	0.176264	0.337359	0.173411	0.395965	0.0138769	0.0227124	0.395408					0.216428	0.151614	0.0573048
69.672	0.184468	0.337519	0.162808	0.389863	0.0137325	0.0296388	0.394022					0.216007	0.149357	0.0564518
69.7703	0.193461	0.337236	0.15211	0.383522	0.0141407	0.0369001	0.392327					0.215671	0.147001	0.0555613
69.8686	0.203167	0.336588	0.141245	0.377017	0.0152957	0.0445369	0.390372					0.21546	0.144571	0.0546429
69.9669	0.213481	0.335684	0.130171	0.37033	0.0171604	0.052413	0.388199					0.215348	0.142158	0.0537307
70.0652	0.22422	0.334544	0.118918	0.363526	0.0195683	0.0604676	0.385751					0.215285	0.139845	0.0528565
70.1635	0.235281	0.333295	0.107579	0.356654	0.0225583	0.0686477	0.383052					0.215295	0.137687	0.0520408
70.2618	0.246612	0.33193	0.0963035	0.349732	0.0261078	0.0769544	0.380116					0.215394	0.135706	0.051292
70.3601	0.258105	0.330501	0.0851697	0.342817	0.0300684	0.0852771	0.376858					0.215542	0.133959	0.0506318
70.4584	0.269661	0.328946	0.0741549	0.335944	0.0344477	0.0936752	0.373352					0.21574	0.132464	0.0500666
70.5567	0.281265	0.327346	0.0632961	0.329164	0.0392313	0.10234	0.369611					0.216036	0.131227	0.0495992
70.655	0.292871	0.325798	0.052615	0.322503	0.0442979	0.111309	0.365548					0.21642	0.130278	0.0492406
70.7533	0.304369	0.324298	0.0421242	0.31603	0.0495606	0.120585	0.361103					0.216867	0.129632	0.0489965
70.8516	0.315763	0.322851	0.0319805	0.309745	0.0549485	0.130086	0.35625					0.217375	0.129282	0.048864
70.9499	0.327067	0.321435	0.0222181	0.30376	0.060456	0.139586	0.350976					0.217928	0.129246	0.0488503
71.0482	0.33828	0.320203	0.0128026	0.298042	0.0659921	0.148941	0.345278					0.218506	0.129559	0.0489687
71.1465	0.34933	0.319244	0.0038611	0.292665	0.0716355	0.157873	0.339155					0.219109	0.130184	0.0492051
71.2448	0.360147	0.318577	-0.00457422	0.287642	0.0773299	0.166127	0.33261					0.219694	0.131097	0.0495501
71.3431	0.370761	0.318227	-0.0123813	0.283018	0.0830074	0.173745	0.325828					0.220315	0.132263	0.0499908
71.4414	0.381213	0.318224	-0.0194284	0.278713	0.0886672	0.180768	0.318848					0.221001	0.13361	0.0505
71.5397	0.391447	0.31866	-0.0257025	0.274702	0.0941466	0.187164	0.311689					0.221729	0.135115	0.0510688
71.638	0.401523	0.319607	-0.0311456	0.270984	0.0993873	0.192941	0.304455					0.222536	0.136755	0.0516884
71.7363	0.41147	0.321128	-0.0356751	0.267583	0.104426	0.198186	0.297283					0.223486	0.138483	0.0523416
71.8346	0.421304	0.323264	-0.0393241	0.264562	0.109275	0.202893	0.29015					0.224589	0.140279	0.0530206
71.933	0.431127	0.325843	-0.0419956	0.261929	0.113841	0.207115	0.283055					0.225845	0.142101	0.0537092
72.0313	0.440952	0.328712	-0.0436733	0.25975	0.118241	0.210933	0.2761					0.227288	0.143902	0.0543899
72.1296	0.450875	0.331922	-0.0444241	0.257996	0.122572	0.214276	0.269394					0.228945	0.1457	0.0550692
72.2279	0.460882	0.335374	-0.0443472	0.25663	0.126761	0.217159	0.262939					0.230771	0.147498	0.055749
72.3262	0.470961	0.338996	-0.0435426	0.255628	0.13085	0.219587	0.256732					0.232744	0.149296	0.0564287
72.4245	0.481107	0.342762	-0.0420539	0.254981	0.135014	0.221587	0.250893					0.234899	0.151077	0.0571016
72.5228	0.491298	0.346712	-0.0399008	0.254646	0.13919	0.222939	0.24533					0.237173	0.152841	0.0577686
72.6211	0.501519	0.350783	-0.0371459	0.254617	0.143198	0.223449	0.240101					0.239503	0.154611	0.0584374
72.7194	0.511711	0.354886	-0.0337012	0.254884	0.147026	0.223201	0.235303					0.241901	0.156334	0.0590888
72.8177	0.521894	0.35905	-0.0295586	0.255435	0.150831	0.222228	0.231001					0.244411	0.158	0.0597185
72.916	0.531987	0.363344	-0.0248795	0.256316	0.154644	0.220491	0.227209					0.247016	0.159635	0.0603363
73.0143	0.541874	0.367712	-0.019626	0.257486	0.158512	0.218052	0.22387					0.249697	0.161189	0.0609237
73.1126	0.551544	0.372129	-0.0137674	0.258979	0.162519	0.214994	0.22096					0.25248	0.162646	0.0614745
73.2109	0.561002	0.376506	-0.00738662	0.260768	0.166641	0.211622	0.218431					0.255369	0.164015	0.0619918
73.3092	0.570115	0.380749	-0.000519983	0.262908	0.170806	0.208122	0.216246					0.258347	0.165259	0.0624619
73.4075	0.57877	0.384848	0.00667461	0.265465	0.17507	0.204468	0.214342					0.261377	0.166379	0.0628853
73.5058	0.586889	0.388767	0.0139833	0.268497	0.179439	0.200685	0.212719					0.264426	0.167392	0.0632682
73.6041	0.594529	0.39252	0.0213267	0.271959	0.183886	0.196801	0.211257					0.267468	0.168333	0.0636239
73.7024	0.601625	0.39612	0.0286165	0.275855	0.188433	0.192799	0.209881					0.270476	0.169203	0.0639527
73.8007	0.608129	0.399528	0.0358711	0.280163	0.193116	0.188595	0.208611					0.27343	0.16998	0.0642464
73.899	0.614004	0.402686	0.0430999	0.284883	0.197786	0.184061	0.20762					0.276306	0.170655	0.0645017
73.9973	0.619163	0.405793	0.0501795	0.289936	0.202415	0.17902	0.206857					0.279052	0.171269	0.0647335
74.0956	0.623505	0.40903	0.0571341	0.295316	0.206985	0.173421	0.206233					0.281661	0.171823	0.0649428
74.1939	0.626967	0.412388	0.0640014	0.301023	0.211458	0.167322	0.205577					0.284105	0.172306	0.0651255
74.2922	0.629645	0.415942	0.0709658	0.307024	0.215856	0.160774	0.204871					0.28644	0.172727	0.0652845
74.3906	0.631597	0.419783	0.0780692	0.313273	0.220025	0.1538	0.204138					0.288669	0.173121	0.0654335
74.4889	0.632841	0.423927	0.0852589	0.319736	0.22365	0.146436	0.203262					0.29073	0.17354	0.0655918
74.5872	0.633415	0.428431	0.0925681	0.326395	0.226838	0.138892	0.202186					0.292675	0.173981	0.0657586
74.6855	0.633259	0.433297	0.0999504	0.333211	0.229747	0.131296	0.20089					0.294522	0.174422	0.0659254
74.7838	0.632393	0.4385	0.10722	0.340157	0.232294	0.1235	0.199342					0.296201	0.174933	0.0661185
74.8821	0.630862	0.44392	0.11432	0.347237	0.234266	0.115532	0.197484					0.29766	0.175545	0.0663496
74.9804	0.628729	0.449485	0.1213	0.354442	0.235726	0.107412	0.195369					0.298923	0.176258	0.0666191
75.0787	0.626171	0.455183	0.128099	0.361695	0.236672	0.099196	0.193075					0.300013	0.177116	0.0669436
75.177	0.623155	0.46091	0.134667	0.368976	0.237041	0.0909606	0.190566					0.300897	0.178103	0.0673168
75.2753	0.619632	0.466705	0.141002	0.376314	0.236846	0.0824675	0.187899					0.301552	0.179251	0.0677506
75.3736	0.615763	0.472639	0.147161	0.383617	0.236193	0.0736448	0.185097					0.302016	0.180612	0.0682648
75.4719	0.611671	0.478705	0.153194	0.39083	0.234949	0.0645586	0.182063					0.302282	0.182214	0.0688704
75.5702	0.607496	0.484916	0.15918	0.397914	0.233086	0.0552056	0.178896					0.302385	0.184078	0.069575
75.6685	0.6032	0.491172	0.165166	0.404926	0.230647	0.0455978	0.175752					0.302352	0.186163	0.0703629
75.7668	0.598806	0.49744	0.171164	0.411821	0.227615	0.0358427	0.172603					0.302185	0.188447	0.0712262
75.8651	0.594371	0.503625	0.176989	0.418631	0.224061	0.026009	0.169378					0.301866	0.190937	0.0721673
75.9634	0.58991	0.509728	0.182595	0.425247	0.220088	0.0162449	0.16586					0.301382	0.193608	0.0731768
76.0617	0.585495	0.515661	0.188048	0.431723	0.215719	0.00674449	0.162047					0.300777	0.196407	0.0742349
76.16	0.581165	0.521277	0.193251	0.43801	0.210925	-0.00241484	0.157941					0.300022	0.199295	0.0753264
76.2583	0.576942	0.52643	0.198179	0.444086	0.205734	-0.0112137	0.153667					0.299118	0.202218	0.0764311
76.3566	0.572741	0.531058	0.202587	0.450008	0.20017	-0.0197001	0.149306					0.298024	0.205156	0.0775416
76.4549	0.568439	0.53515	0.206355	0.455822	0.194447	-0.0280449	0.144932					0.296729	0.208097	0.0786533
[truncated: 2,276 more rows]

## Sheet: IP Saline_CCK-Cre
TimeStamp	M0128_re	0312-1 side_re	0312-2 side_re	0316-2 side_re	Cre-0903_1 side_re	Cre-0903_2 side_re	Cre-0907_1 side-1_re	Cre-0907_1 side-2_re	Cre-0908_2 side_re			N=n=9	SD	se
-119.956		0.292275	0.276691	0.307952	-0.0212689	-0.245625	-0.22113	-0.428425	-0.0476207			-0.0108939	0.262528	0.0875092
-119.858		0.297617	0.272433	0.306719	-0.0195505	-0.248124	-0.214402	-0.424854	-0.0479821			-0.00976787	0.261445	0.0871483
-119.76		0.302693	0.267035	0.304823	-0.0179516	-0.250512	-0.207384	-0.420584	-0.0488129			-0.00883675	0.259948	0.0866493
-119.662		0.307489	0.260511	0.302167	-0.0164357	-0.252895	-0.200206	-0.415841	-0.0500496			-0.00815753	0.2581	0.0860334
-119.563		0.311786	0.253097	0.298808	-0.014946	-0.255168	-0.192891	-0.410786	-0.0515552			-0.00770688	0.255935	0.0853118
-119.465		0.315511	0.244888	0.294604	-0.0134848	-0.257239	-0.185533	-0.405489	-0.0532706			-0.00750179	0.25345	0.0844832
-119.367		0.318794	0.235832	0.289445	-0.0119774	-0.259022	-0.178236	-0.400074	-0.0551394			-0.00754716	0.250667	0.0835557
-119.268		0.321529	0.226037	0.283366	-0.0104741	-0.260505	-0.171151	-0.394562	-0.0571095			-0.00785875	0.247609	0.0825363
-119.17		0.323769	0.215781	0.276445	-0.00900598	-0.261717	-0.164368	-0.388979	-0.059257			-0.00841645	0.244349	0.0814498
-119.072		0.325483	0.204984	0.268694	-0.00767392	-0.262484	-0.157861	-0.383491	-0.0615569			-0.00923829	0.240884	0.0802948
-118.973		0.32656	0.193491	0.260146	-0.00653207	-0.26284	-0.151654	-0.378163	-0.063931			-0.0103655	0.237202	0.0790673
-118.875		0.327008	0.181285	0.250848	-0.00548451	-0.262753	-0.14579	-0.37295	-0.0664738			-0.0117887	0.233304	0.077768
-118.777		0.326705	0.168416	0.241074	-0.00441303	-0.262219	-0.140344	-0.367822	-0.0690375			-0.0134551	0.229211	0.0764037
-118.678		0.325623	0.155084	0.230951	-0.00322169	-0.261211	-0.135443	-0.362865	-0.0716635			-0.0153431	0.22498	0.0749935
-118.58		0.323611	0.141654	0.220518	-0.0020118	-0.259703	-0.131157	-0.358096	-0.0743967			-0.0174477	0.220625	0.0735416
-118.482		0.320744	0.128227	0.210018	-0.00078317	-0.257689	-0.127481	-0.353322	-0.0771676			-0.0196817	0.216152	0.0720508
-118.384		0.316989	0.115113	0.199492	0.000522413	-0.255149	-0.124342	-0.348656	-0.0800468			-0.0220097	0.211597	0.0705322
-118.285		0.312239	0.102281	0.188996	0.00184308	-0.252164	-0.121562	-0.344157	-0.0830185			-0.0244428	0.206941	0.0689804
-118.187		0.306726	0.0898984	0.178517	0.00318702	-0.248737	-0.119074	-0.339831	-0.0859748			-0.0269111	0.202229	0.0674098
-118.089		0.300493	0.0778374	0.167991	0.00459419	-0.244978	-0.116792	-0.335715	-0.0887753			-0.029418	0.197457	0.065819
-117.99		0.293837	0.0659285	0.157557	0.00598027	-0.240992	-0.114654	-0.331737	-0.0914383			-0.0319398	0.192685	0.0642282
-117.892		0.286863	0.0544958	0.147272	0.00740616	-0.236729	-0.11259	-0.327993	-0.0940141			-0.0344111	0.187971	0.0626572
-117.794		0.279735	0.0438011	0.13722	0.0087803	-0.232342	-0.11059	-0.32455	-0.0965503			-0.0368119	0.183406	0.0611355
-117.695		0.272467	0.0337748	0.127512	0.010058	-0.227806	-0.108693	-0.32132	-0.0990665			-0.0391342	0.178976	0.0596585
-117.597		0.264933	0.0243353	0.118081	0.0111718	-0.223114	-0.106794	-0.318139	-0.101676			-0.0414002	0.174597	0.058199
-117.499		0.257373	0.0154212	0.108908	0.0119656	-0.218423	-0.104879	-0.314947	-0.104485			-0.0436333	0.170319	0.056773
-117.401		0.249792	0.00718762	0.100125	0.012489	-0.213709	-0.102968	-0.311705	-0.107588			-0.0457971	0.166154	0.0553848
-117.302		0.242155	-0.000384185	0.0918288	0.012677	-0.209018	-0.101081	-0.308403	-0.110973			-0.0478999	0.1621	0.0540333
-117.204		0.234553	-0.00759654	0.0839842	0.0125226	-0.204371	-0.099153	-0.305067	-0.114715			-0.0499804	0.158162	0.0527208
-117.106		0.226914	-0.0146599	0.0766198	0.012035	-0.199784	-0.0971365	-0.301732	-0.118837			-0.0520726	0.15433	0.0514432
-117.007		0.219256	-0.0213165	0.0697714	0.0112018	-0.195409	-0.0950917	-0.298323	-0.123307			-0.0541523	0.15062	0.0502065
-116.909		0.211636	-0.0273171	0.0634337	0.0100291	-0.191169	-0.0929444	-0.294834	-0.12821			-0.056172	0.14704	0.0490135
-116.811		0.204135	-0.0327303	0.0575916	0.00851132	-0.187111	-0.0906215	-0.29137	-0.133485			-0.0581349	0.143628	0.047876
-116.712		0.196896	-0.0376853	0.052033	0.00649716	-0.183408	-0.0881652	-0.287871	-0.139111			-0.0601018	0.140389	0.0467964
-116.614		0.18993	-0.0420539	0.0467321	0.00393391	-0.180073	-0.0854836	-0.284329	-0.145022			-0.0620458	0.137319	0.0457731
-116.516		0.183336	-0.0459023	0.0415876	0.000950869	-0.177092	-0.0825619	-0.280725	-0.151191			-0.0639498	0.134432	0.0448108
-116.417		0.177039	-0.0491854	0.036479	-0.00239033	-0.174503	-0.0794888	-0.277211	-0.157586			-0.0658558	0.131744	0.0439147
-116.319		0.171077	-0.0522843	0.0314641	-0.00616984	-0.172373	-0.0764091	-0.273684	-0.164142			-0.0678151	0.129245	0.0430816
-116.221		0.165526	-0.054921	0.0267395	-0.0104245	-0.170646	-0.0735859	-0.270096	-0.170887			-0.0697868	0.126968	0.0423226
-116.123		0.160101	-0.0571824	0.0224033	-0.0151223	-0.169218	-0.0710447	-0.266433	-0.177996			-0.0718116	0.124864	0.0416214
-116.024		0.154758	-0.0590054	0.0185087	-0.0202454	-0.168031	-0.0687955	-0.262691	-0.185536			-0.0738796	0.122941	0.0409803
-115.926		0.149374	-0.0600506	0.0150247	-0.0257281	-0.166971	-0.0669858	-0.258927	-0.19346			-0.0759655	0.12118	0.0403933
-115.828		0.143931	-0.0608955	0.0120253	-0.0315753	-0.166119	-0.0657086	-0.255086	-0.201633			-0.0781326	0.119565	0.0398549
-115.729		0.138441	-0.0615506	0.00950324	-0.0376829	-0.165418	-0.0650173	-0.25115	-0.210009			-0.0803604	0.118096	0.0393652
-115.631		0.132962	-0.0618496	0.00749039	-0.0439188	-0.164816	-0.064923	-0.247137	-0.218528			-0.08259	0.116796	0.0389321
-115.533		0.127616	-0.0617843	0.00618196	-0.0502414	-0.164293	-0.0654974	-0.243031	-0.226951			-0.0847499	0.115681	0.0385605
-115.434		0.122371	-0.0615429	0.00554264	-0.0565268	-0.163813	-0.0666558	-0.238867	-0.235232			-0.0868403	0.114743	0.0382476
-115.336		0.117257	-0.0614407	0.00556365	-0.0627644	-0.163452	-0.0683245	-0.234697	-0.243369			-0.0889036	0.113996	0.0379986
-115.238		0.112294	-0.0612606	0.00624604	-0.0689128	-0.163255	-0.0704198	-0.230479	-0.25129			-0.0908846	0.11344	0.0378133
-115.14		0.107507	-0.0608818	0.00766809	-0.0749016	-0.163184	-0.0728967	-0.226273	-0.258828			-0.0927238	0.113074	0.0376914
-115.041		0.10296	-0.0603247	0.00982882	-0.0806371	-0.16321	-0.0757243	-0.221969	-0.265937			-0.0943767	0.112887	0.037629
-114.943		0.0987518	-0.059671	0.0127944	-0.0860942	-0.16335	-0.0788877	-0.217556	-0.272619			-0.0958289	0.112905	0.0376351
-114.845		0.0948936	-0.0590709	0.0166177	-0.0912876	-0.163733	-0.0825272	-0.21315	-0.278886			-0.0971429	0.113159	0.0377196
-114.746		0.0912947	-0.0583817	0.0214223	-0.0962485	-0.164265	-0.0866818	-0.208739	-0.284728			-0.0982909	0.113642	0.0378806
-114.648		0.0878471	-0.0575225	0.0273834	-0.100908	-0.164726	-0.0912191	-0.204291	-0.290285			-0.0992153	0.114382	0.0381272
-114.55		0.0846382	-0.0567988	0.0345847	-0.105241	-0.165204	-0.0960879	-0.19975	-0.295575			-0.0999292	0.115415	0.0384716
-114.451		0.0817465	-0.0561755	0.0432325	-0.109306	-0.165723	-0.101235	-0.195151	-0.300547			-0.100395	0.116805	0.038935
-114.353		0.0790724	-0.0557395	0.0533796	-0.113177	-0.166178	-0.10648	-0.190418	-0.305178			-0.10059	0.118542	0.0395139
-114.255		0.0766959	-0.0553554	0.064933	-0.116707	-0.166505	-0.111652	-0.185667	-0.309437			-0.100462	0.120653	0.0402175
-114.156		0.0746428	-0.0550524	0.0777385	-0.119749	-0.166713	-0.116573	-0.180913	-0.313274			-0.0999868	0.123116	0.0410385
-114.058		0.0730933	-0.0549331	0.0917782	-0.122289	-0.166968	-0.121226	-0.176124	-0.316539			-0.0991511	0.125937	0.0419791
-113.96		0.0721529	-0.054837	0.107032	-0.124338	-0.167247	-0.125661	-0.171328	-0.319218			-0.0979306	0.129142	0.0430473
-113.862		0.0717501	-0.0549064	0.12347	-0.125807	-0.167652	-0.129677	-0.166606	-0.321367			-0.0963494	0.132725	0.0442416
-113.763		0.0720316	-0.0548161	0.141031	-0.12677	-0.168072	-0.133167	-0.161952	-0.323017			-0.0943413	0.136703	0.0455676
-113.665		0.0730135	-0.0544943	0.15969	-0.12743	-0.168534	-0.136051	-0.157409	-0.324028			-0.0919052	0.141046	0.0470154
-113.567		0.0747136	-0.0541785	0.17926	-0.127863	-0.169087	-0.138173	-0.15298	-0.324394			-0.0890875	0.145698	0.0485661
-113.468		0.0771209	-0.0538033	0.199593	-0.128066	-0.169737	-0.13952	-0.148701	-0.324317			-0.0859287	0.150657	0.050219
-113.37		0.0801554	-0.0532052	0.220823	-0.128111	-0.170497	-0.140148	-0.144506	-0.323748			-0.0824047	0.15593	0.0519765
-113.272		0.0838972	-0.0521995	0.242888	-0.128017	-0.171254	-0.140136	-0.140341	-0.322692			-0.0784817	0.161502	0.053834
-113.173		0.0882619	-0.0510872	0.265737	-0.127721	-0.17193	-0.139583	-0.136208	-0.321318			-0.0742309	0.167365	0.0557883
-113.075		0.093181	-0.0497377	0.28929	-0.127255	-0.172584	-0.138512	-0.132041	-0.319677			-0.069667	0.173497	0.0578324
-112.977		0.0985875	-0.0479629	0.313454	-0.126686	-0.173242	-0.137066	-0.12802	-0.317775			-0.0648389	0.179882	0.0599607
-112.879		0.104381	-0.0460781	0.338031	-0.126008	-0.173943	-0.135162	-0.124167	-0.31561			-0.0598195	0.186442	0.0621475
-112.78		0.110575	-0.0440632	0.362942	-0.125136	-0.17456	-0.132621	-0.120366	-0.31306			-0.0545361	0.193105	0.0643682
-112.682		0.11728	-0.0420044	0.387907	-0.124003	-0.175182	-0.129419	-0.116555	-0.310142			-0.0490148	0.1998	0.0665999
-112.584		0.124602	-0.0398868	0.41276	-0.1226	-0.175896	-0.125638	-0.112851	-0.306747			-0.0432821	0.206484	0.068828
-112.485		0.132373	-0.0375527	0.437337	-0.120903	-0.176604	-0.121299	-0.109397	-0.302812			-0.0373572	0.213077	0.0710257
-112.387		0.140491	-0.0352419	0.461331	-0.119008	-0.177286	-0.116345	-0.106197	-0.298411			-0.0313332	0.219491	0.0731635
-112.289		0.149106	-0.0329558	0.484563	-0.116885	-0.178048	-0.11093	-0.103284	-0.29361			-0.0252556	0.22571	0.0752367
-112.19		0.158096	-0.0305272	0.507019	-0.114652	-0.178875	-0.105169	-0.100691	-0.288481			-0.01916	0.231738	0.077246
-112.092		0.167351	-0.028087	0.52869	-0.112435	-0.179732	-0.0990077	-0.0984499	-0.283087			-0.0130947	0.23757	0.0791899
-111.994		0.176766	-0.0255187	0.549438	-0.110189	-0.180515	-0.092408	-0.0965618	-0.27747			-0.00705735	0.243146	0.0810488
-111.895		0.186167	-0.0230051	0.569214	-0.107961	-0.181295	-0.0853447	-0.0950099	-0.271626			-0.00110771	0.248444	0.0828148
-111.797		0.195532	-0.0205063	0.587923	-0.105873	-0.181943	-0.077926	-0.0936984	-0.265483			0.00475313	0.253419	0.0844731
-111.699		0.204572	-0.017946	0.605464	-0.103783	-0.18247	-0.0701689	-0.0927426	-0.259155			0.0104714	0.258029	0.0860098
-111.601		0.213191	-0.0156458	0.621797	-0.101524	-0.18282	-0.0621641	-0.0921082	-0.252885			0.0159802	0.262277	0.0874256
-111.502		0.221298	-0.0135374	0.637073	-0.0991478	-0.182947	-0.0539707	-0.0918385	-0.246785			0.0212681	0.266212	0.0887373
-111.404		0.228885	-0.0117292	0.651276	-0.0967094	-0.182843	-0.0455379	-0.0919596	-0.240886			0.0263121	0.269835	0.0899451
-111.306		0.235916	-0.0100679	0.6642	-0.094087	-0.182445	-0.0367872	-0.0925893	-0.235253			0.0311109	0.273081	0.091027
-111.207		0.242274	-0.00851395	0.675806	-0.0913103	-0.181815	-0.027642	-0.0937957	-0.229758			0.0356556	0.275921	0.0919735
-111.109		0.247998	-0.00683537	0.686029	-0.0885465	-0.181017	-0.0180068	-0.0956905	-0.224201			0.0399663	0.278335	0.0927783
-111.011		0.25314	-0.00512458	0.694797	-0.0858498	-0.180042	-0.00789916	-0.0983603	-0.218693			0.0439959	0.280337	0.0934458
-110.912		0.257745	-0.00350696	0.702115	-0.0832461	-0.178875	0.00289272	-0.101716	-0.213235			0.0477717	0.281936	0.0939787
-110.814		0.261667	-0.00161761	0.708098	-0.0807278	-0.177331	0.0142881	-0.105811	-0.207831			0.0513419	0.28314	0.0943799
-110.716		0.264742	0.000443044	0.712694	-0.0783857	-0.175422	0.0261666	-0.110767	-0.202571			0.0546124	0.28396	0.0946534
-110.618		0.266841	0.00276268	0.716004	-0.0763996	-0.173116	0.0385794	-0.116644	-0.197483			0.0575681	0.284442	0.0948142
-110.519		0.267882	0.0053673	0.718083	-0.0747534	-0.170373	0.051555	-0.123354	-0.192637			0.0602212	0.284609	0.0948697
-110.421		0.268	0.00837019	0.719045	-0.0734111	-0.167222	0.0649512	-0.130804	-0.188073			0.062607	0.28452	0.0948401
-110.323		0.267177	0.0121302	0.719109	-0.0722757	-0.163645	0.0786776	-0.13897	-0.183689			0.0648142	0.284229	0.094743
-110.224		0.265329	0.016704	0.718465	-0.0713373	-0.159515	0.0927717	-0.147844	-0.179472			0.0668876	0.283788	0.0945962
-110.126		0.262594	0.0219624	0.717046	-0.0705381	-0.154973	0.107218	-0.157299	-0.175385			0.0688281	0.283215	0.094405
-110.028		0.259164	0.0278895	0.714834	-0.0699222	-0.15009	0.121856	-0.167346	-0.171386			0.070625	0.282549	0.094183
-109.929		0.255127	0.0342951	0.71196	-0.0695311	-0.14486	0.136595	-0.178027	-0.167488			0.0722588	0.28187	0.0939566
-109.831		0.250553	0.0412703	0.708454	-0.0693098	-0.139212	0.151454	-0.189312	-0.163586			0.0737888	0.281192	0.0937306
-109.733		0.245644	0.0487756	0.704476	-0.0692073	-0.133288	0.166473	-0.201197	-0.159728			0.0752436	0.280619	0.0935396
-109.634		0.240613	0.0566802	0.700135	-0.0693756	-0.127168	0.181509	-0.213523	-0.155874			0.0766248	0.280211	0.0934036
-109.536		0.235491	0.0652312	0.695448	-0.0698966	-0.120905	0.196558	-0.226313	-0.151903			0.0779637	0.279992	0.0933306
-109.438		0.230321	0.0744729	0.690325	-0.0707685	-0.114554	0.211502	-0.239519	-0.147715			0.0792579	0.279942	0.0933141
-109.34		0.225186	0.0844259	0.684815	-0.0719341	-0.108155	0.226158	-0.253154	-0.143254			0.0805111	0.280085	0.0933616
-109.241		0.220129	0.0946276	0.678991	-0.0735097	-0.101796	0.240332	-0.26713	-0.138548			0.0816371	0.280447	0.0934822
-109.143		0.215169	0.104956	0.672816	-0.0754771	-0.0955309	0.253962	-0.281423	-0.133712			0.0825951	0.281029	0.0936762
-109.045		0.210293	0.115351	0.666417	-0.0777247	-0.0893124	0.266971	-0.29591	-0.128955			0.0833912	0.281845	0.0939482
-108.946		0.205387	0.125746	0.659995	-0.0801722	-0.083116	0.279364	-0.31053	-0.124226			0.084056	0.282911	0.0943036
-108.848		0.200487	0.136142	0.65354	-0.0828762	-0.0769821	0.291	-0.325191	-0.119508			0.0845763	0.284193	0.094731
-108.75		0.195866	0.146443	0.646988	-0.0857778	-0.0710576	0.301827	-0.339763	-0.114932			0.0849491	0.285663	0.0952209
-108.651		0.191622	0.156678	0.640459	-0.088784	-0.0653759	0.311796	-0.35406	-0.110582			0.0852191	0.287297	0.0957656
-108.553		0.187826	0.166884	0.634045	-0.091784	-0.0599747	0.320823	-0.368036	-0.106463			0.0854152	0.289074	0.096358
-108.455		0.184416	0.176868	0.627827	-0.0948111	-0.0548949	0.328899	-0.381774	-0.102565			0.0854958	0.290996	0.0969987
-108.357		0.181383	0.186404	0.621676	-0.0979608	-0.0502003	0.336061	-0.395254	-0.0989893			0.0853899	0.293017	0.0976725
-108.258		0.178817	0.195236	0.615521	-0.101319	-0.0459873	0.342312	-0.408479	-0.0957858			0.0850395	0.295105	0.0983682
-108.16		0.176693	0.203289	0.609302	-0.104864	-0.0424481	0.347656	-0.421399	-0.0929931			0.0844046	0.297214	0.0990714
-108.062		0.17488	0.210506	0.603202	-0.108612	-0.0394512	0.352132	-0.433992	-0.0906854			0.0834975	0.299353	0.0997843
-107.963		0.173215	0.217092	0.597302	-0.112477	-0.0369959	0.355819	-0.446171	-0.0888628			0.0823652	0.301501	0.1005
-107.865		0.171631	0.223318	0.591516	-0.116455	-0.0350593	0.358724	-0.457923	-0.0875606			0.0810237	0.303631	0.10121
-107.767		0.17015	0.22908	0.585799	-0.12062	-0.0336564	0.360793	-0.469282	-0.0869435			0.079415	0.305731	0.10191
-107.668		0.168633	0.234377	0.580127	-0.124983	-0.0327174	0.362072	-0.480292	-0.0869231			0.0775366	0.307783	0.102594
-107.57		0.167109	0.239247	0.574423	-0.129467	-0.0322467	0.362674	-0.490975	-0.0874414			0.0754153	0.309771	0.103257
-107.472		0.165581	0.243582	0.568669	-0.134013	-0.0322038	0.362587	-0.501262	-0.088551			0.0730487	0.311652	0.103884
-107.374		0.164062	0.24737	0.562931	-0.138548	-0.0326036	0.361905	-0.51112	-0.0902652			0.0704664	0.313429	0.104476
-107.275		0.162353	0.250764	0.557258	-0.143023	-0.0334117	0.360862	-0.52046	-0.0925363			0.0677257	0.315103	0.105034
-107.177		0.160481	0.254044	0.551734	-0.147317	-0.0346236	0.359583	-0.529231	-0.0952365			0.0649295	0.316689	0.105563
-107.079		0.158592	0.257252	0.546434	-0.151447	-0.0362319	0.358036	-0.53735	-0.0982813			0.0621255	0.318176	0.106059
-106.98		0.156724	0.260338	0.541272	-0.155427	-0.0383164	0.356227	-0.544838	-0.101601			0.0592972	0.319546	0.106515
-106.882		0.155016	0.263306	0.536078	-0.159215	-0.0408583	0.354061	-0.551708	-0.105108			0.0564466	0.320752	0.106917
-106.784		0.153453	0.266242	0.530914	-0.162685	-0.0438257	0.351546	-0.558173	-0.1088			0.0535837	0.32185	0.107283
-106.685		0.151909	0.269045	0.525915	-0.165997	-0.0471937	0.348749	-0.564253	-0.112542			0.0507041	0.322865	0.107622
-106.587		0.150443	0.271883	0.521085	-0.169201	-0.0510487	0.345687	-0.570086	-0.116149			0.0478266	0.323846	0.107949
-106.489		0.149024	0.27466	0.516449	-0.172275	-0.0553917	0.342342	-0.575712	-0.119494			0.0449503	0.324783	0.108261
-106.39		0.147729	0.27746	0.511864	-0.175192	-0.0602016	0.338638	-0.581016	-0.122451			0.0421038	0.325614	0.108538
-106.292		0.146484	0.280336	0.507383	-0.177931	-0.0654322	0.334501	-0.585997	-0.124916			0.0393036	0.326334	0.108778
-106.194		0.145216	0.283323	0.503046	-0.180343	-0.0710995	0.329955	-0.590621	-0.126897			0.0365726	0.326937	0.108979
-106.096		0.144041	0.286374	0.498829	-0.182384	-0.0770643	0.324949	-0.594949	-0.12837			0.0339281	0.327417	0.109139
-105.997		0.142946	0.289526	0.494607	-0.183994	-0.0833485	0.319452	-0.598998	-0.129213			0.0313722	0.327751	0.10925
-105.899		0.141971	0.292453	0.490284	-0.185116	-0.0899185	0.313405	-0.602837	-0.129429			0.0288516	0.327899	0.1093
-105.801		0.141289	0.29513	0.485879	-0.185802	-0.0968117	0.306835	-0.6064	-0.128987			0.0263915	0.327867	0.109289
-105.702		0.140958	0.297693	0.481556	-0.185939	-0.104093	0.299728	-0.609607	-0.127794			0.0240628	0.327672	0.109224
-105.604		0.140995	0.300148	0.477179	-0.185489	-0.111766	0.291895	-0.612379	-0.125936			0.0218309	0.327266	0.109089
-105.506		0.141321	0.302391	0.472723	-0.184497	-0.119764	0.283326	-0.614804	-0.123436			0.0196576	0.326662	0.108887
-105.407		0.14186	0.304327	0.468181	-0.18302	-0.128147	0.274018	-0.616886	-0.120267			0.0175083	0.325864	0.108621
-105.309		0.142578	0.305983	0.463513	-0.181075	-0.136893	0.263887	-0.61869	-0.116425			0.0153596	0.324886	0.108295
-105.211		0.14361	0.307204	0.458696	-0.178758	-0.145988	0.252798	-0.620286	-0.112013			0.013158	0.323746	0.107915
-105.113		0.144846	0.30789	0.453664	-0.17616	-0.155365	0.240772	-0.621696	-0.107221			0.0108412	0.32245	0.107483
-105.014		0.146082	0.308177	0.448473	-0.173241	-0.165	0.227873	-0.622966	-0.102094			0.00841307	0.321043	0.107014
-104.916		0.147215	0.308159	0.443063	-0.170053	-0.174792	0.214189	-0.624089	-0.0966142			0.00588459	0.319537	0.106512
-104.818		0.148293	0.307884	0.437444	-0.166709	-0.184759	0.199825	-0.624986	-0.0909628			0.00325363	0.317961	0.105987
-104.719		0.149242	0.30728	0.431522	-0.163265	-0.194919	0.184778	-0.625466	-0.0851911			0.000497573	0.31626	0.10542
-104.621		0.150093	0.306229	0.425139	-0.15956	-0.205221	0.169163	-0.625645	-0.0792685			-0.00238377	0.314426	0.104809
-104.523		0.150863	0.304549	0.418176	-0.15558	-0.215454	0.153079	-0.625395	-0.0732765			-0.00537961	0.312389	0.10413
-104.424		0.151538	0.302228	0.4105	-0.15133	-0.225573	0.136621	-0.624648	-0.0674033			-0.00850831	0.310124	0.103375
-104.326		0.152115	0.299372	0.402152	-0.146792	-0.235572	0.119953	-0.623491	-0.0617419			-0.0117507	0.307687	0.102562
-104.228		0.152637	0.296115	0.393169	-0.141898	-0.245355	0.103321	-0.621892	-0.056302			-0.0150257	0.3051	0.1017
-104.129		0.153155	0.292375	0.383605	-0.136799	-0.254746	0.0867484	-0.619851	-0.0511103			-0.0183278	0.302359	0.100786
-104.031		0.153638	0.288234	0.373458	-0.131629	-0.263775	0.0702973	-0.617353	-0.0461291			-0.0216575	0.299479	0.0998262
-103.933		0.154154	0.283611	0.362732	-0.126491	-0.272434	0.0539933	-0.614388	-0.0414406			-0.025033	0.296455	0.0988184
-103.835		0.154725	0.278678	0.351476	-0.12142	-0.280696	0.037935	-0.610966	-0.0370182			-0.0284109	0.293322	0.0977739
-103.736		0.155078	0.273249	0.33971	-0.11645	-0.288534	0.0222535	-0.607166	-0.0328179			-0.0318347	0.290052	0.0966842
-103.638		0.155152	0.267208	0.327271	-0.111613	-0.295855	0.00701906	-0.603079	-0.0288374			-0.0353417	0.286609	0.0955364
-103.54		0.154921	0.260523	0.314249	-0.106935	-0.302665	-0.0076296	-0.598777	-0.025048			-0.0389201	0.283012	0.0943374
-103.441		0.154382	0.253448	0.300677	-0.102404	-0.30898	-0.0216654	-0.59418	-0.0214722			-0.0425243	0.279273	0.0930909
-103.343		0.153603	0.24619	0.286674	-0.0978559	-0.314621	-0.035012	-0.589325	-0.0180737			-0.0460525	0.275417	0.0918057
-103.245		0.152622	0.238797	0.272357	-0.0932575	-0.319557	-0.0476	-0.584131	-0.0148275			-0.0494495	0.271441	0.0904803
-103.146		0.151431	0.231372	0.257639	-0.0887108	-0.323776	-0.0593658	-0.578618	-0.0116082			-0.0527046	0.267343	0.0891143
-103.048		0.1501	0.223991	0.24256	-0.0842575	-0.327224	-0.0703904	-0.572898	-0.00835464			-0.0558091	0.263161	0.0877204
-102.95		0.148725	0.216431	0.227116	-0.0799036	-0.329897	-0.0806491	-0.567001	-0.00506454			-0.0587804	0.258877	0.0862924
-102.852		0.147401	0.20863	0.211499	-0.0756196	-0.331859	-0.090184	-0.560949	-0.00168986			-0.0615966	0.254529	0.0848431
-102.753		0.145928	0.200607	0.195872	-0.0712889	-0.333122	-0.0990434	-0.554742	0.00192274			-0.0642334	0.250125	0.0833751
-102.655		0.144372	0.192423	0.180415	-0.0669383	-0.333646	-0.107208	-0.548384	0.00575124			-0.0666519	0.245696	0.0818986
-102.557		0.142642	0.184414	0.165307	-0.0626435	-0.333448	-0.114803	-0.54181	0.00971385			-0.0688285	0.24128	0.0804266
-102.458		0.140636	0.176794	0.150732	-0.0584018	-0.332696	-0.121908	-0.535092	0.013824			-0.0707639	0.236952	0.0789839
-102.36		0.138429	0.169558	0.136792	-0.0541842	-0.331326	-0.128561	-0.528256	0.0182324			-0.0724144	0.232729	0.0775762
-102.262		0.136159	0.16258	0.123667	-0.0501218	-0.329341	-0.134952	-0.521279	0.0229173			-0.0737963	0.228622	0.0762073
-102.163		0.133799	0.155715	0.11134	-0.0463108	-0.326831	-0.141252	-0.51421	0.0277847			-0.0749958	0.224625	0.0748749
-102.065		0.131276	0.149223	0.0996475	-0.0426598	-0.323909	-0.147454	-0.507044	0.0329001			-0.0760025	0.220759	0.0735862
-101.967		0.128563	0.143179	0.0887368	-0.0392061	-0.320514	-0.153501	-0.499783	0.0382794			-0.0767806	0.21703	0.0723435
-101.868		0.125604	0.137715	0.0787236	-0.0359077	-0.316642	-0.159327	-0.492394	0.0439027			-0.0772908	0.213443	0.0711478
-101.77		0.122433	0.132938	0.0696928	-0.0328085	-0.31236	-0.165037	-0.484758	0.0497273			-0.0775217	0.209997	0.0699989
-101.672		0.119232	0.129028	0.0615928	-0.0297473	-0.307755	-0.170807	-0.476903	0.0556751			-0.0774606	0.20675	0.0689168
-101.574		0.115958	0.126023	0.0544268	-0.0267914	-0.302791	-0.17655	-0.46876	0.0617153			-0.0770961	0.203671	0.0678903
-101.475		0.112689	0.123928	0.0482116	-0.024007	-0.297411	-0.182246	-0.46033	0.0678169			-0.0764185	0.200751	0.0669171
-101.377		0.109449	0.122611	0.0430799	-0.0213361	-0.291553	-0.187845	-0.451694	0.0739459			-0.0754178	0.197992	0.0659972
-101.279		0.106285	0.121996	0.0389751	-0.0189622	-0.285387	-0.193272	-0.442854	0.0800323			-0.0741482	0.195384	0.0651279
-101.18		0.103223	0.122019	0.0357509	-0.0170179	-0.278897	-0.19848	-0.433836	0.0859525			-0.0726606	0.192891	0.0642969
-101.082		0.10032	0.122595	0.0334511	-0.0153354	-0.272112	-0.20342	-0.424544	0.0915863			-0.0709324	0.190475	0.0634918
-100.984		0.0975898	0.123668	0.0320525	-0.0138937	-0.265148	-0.208007	-0.414894	0.0970544			-0.0689473	0.188127	0.0627091
-100.885		0.0950161	0.125375	0.0315497	-0.0127192	-0.257948	-0.212231	-0.404815	0.102309			-0.066683	0.185827	0.0619422
-100.787		0.0925656	0.127712	0.0318007	-0.0117563	-0.25051	-0.216058	-0.39432	0.107248			-0.0641648	0.183548	0.0611826
-100.689		0.0903714	0.130521	0.0326502	-0.0111171	-0.242811	-0.219397	-0.383446	0.111789			-0.06143	0.181254	0.0604179
-100.591		0.0884579	0.133722	0.0338782	-0.0107435	-0.234836	-0.22215	-0.372229	0.115947			-0.0584941	0.178918	0.0596394
-100.492		0.0868324	0.13724	0.0354224	-0.0106526	-0.226675	-0.224322	-0.360622	0.119726			-0.0553813	0.176526	0.0588419
-100.394		0.0855807	0.140932	0.0372034	-0.010847	-0.218211	-0.225782	-0.348678	0.123049			-0.052094	0.174029	0.0580096
-100.296		0.0846864	0.144833	0.0391656	-0.0113553	-0.209541	-0.226532	-0.336398	0.12577			-0.0486715	0.171415	0.0571385
-100.197		0.0839492	0.148991	0.0410615	-0.0120698	-0.200715	-0.226419	-0.323813	0.127907			-0.0451384	0.168651	0.0562169
-100.099		0.0834202	0.153425	0.0429124	-0.0129328	-0.191703	-0.225354	-0.310904	0.12955			-0.0414482	0.165734	0.0552447
-100.001		0.0831572	0.158076	0.0449067	-0.0139416	-0.182498	-0.223443	-0.297702	0.130665			-0.0375974	0.162687	0.0542291
-99.9024		0.0831528	0.162811	0.0468514	-0.0149434	-0.17322	-0.220775	-0.284287	0.131258			-0.0336441	0.159523	0.0531742
-99.8041		0.0833192	0.167615	0.0486429	-0.0159537	-0.163896	-0.217385	-0.270755	0.131346			-0.0296332	0.156249	0.0520831
-99.7058		0.0836595	0.172299	0.0502532	-0.0169847	-0.154506	-0.213173	-0.257256	0.130989			-0.0255899	0.152854	0.0509512
-99.6075		0.0841452	0.176867	0.0517512	-0.0181086	-0.145068	-0.208083	-0.24364	0.130169			-0.0214958	0.149298	0.049766
-99.5092		0.0847417	0.181313	0.0532686	-0.0192458	-0.135763	-0.20231	-0.229987	0.128846			-0.0173922	0.145645	0.0485484
-99.4109		0.085356	0.185688	0.0547903	-0.0202725	-0.126695	-0.195877	-0.216321	0.127078			-0.0132816	0.14192	0.0473066
-99.3126		0.0859616	0.190016	0.0562339	-0.0212942	-0.118038	-0.188927	-0.202557	0.124937			-0.00920838	0.138157	0.0460522
-99.2143		0.0865404	0.194206	0.0576801	-0.0223322	-0.109813	-0.181642	-0.188774	0.122465			-0.00520863	0.134397	0.0447989
-99.116		0.0869412	0.198216	0.0591588	-0.0232587	-0.102108	-0.174055	-0.175043	0.119725			-0.00130304	0.130658	0.0435525
-99.0177		0.0870551	0.2023	0.0607207	-0.0241039	-0.0949802	-0.166253	-0.161472	0.116875			0.00251781	0.127041	0.042347
-98.9194		0.087014	0.206507	0.0624191	-0.0248041	-0.0883907	-0.158296	-0.148127	0.113843			0.00627065	0.123585	0.041195
-98.8211		0.086844	0.210814	0.0641828	-0.0253805	-0.0823676	-0.150307	-0.135048	0.110672			0.0099262	0.120324	0.0401079
-98.7227		0.0866422	0.21528	0.0660799	-0.0258995	-0.0769498	-0.142426	-0.122273	0.107476			0.0134912	0.117336	0.0391119
-98.6244		0.0863847	0.220038	0.0681598	-0.0263458	-0.0721796	-0.134713	-0.109849	0.104246			0.0169676	0.114677	0.0382257
-98.5261		0.0860982	0.225111	0.0706144	-0.0267572	-0.0681319	-0.127269	-0.097879	0.101059			0.0203557	0.112421	0.0374737
-98.4278		0.0859063	0.230378	0.0733926	-0.0270756	-0.0647578	-0.120078	-0.0864948	0.0979827			0.0236566	0.110561	0.0368538
-98.3295		0.0857974	0.235642	0.0763933	-0.0274393	-0.062169	-0.113235	-0.0756857	0.0951771			0.02681	0.109088	0.0363626
-98.2312		0.0856546	0.240865	0.079585	-0.0278999	-0.0603863	-0.106781	-0.065537	0.0927625			0.029783	0.108003	0.036001
-98.1329		0.0855861	0.246076	0.0831361	-0.0283802	-0.0594295	-0.100757	-0.0560433	0.0907523			0.0326176	0.107323	0.0357742
-98.0346		0.0855973	0.251325	0.0869909	-0.0288691	-0.0593771	-0.0952225	-0.0472777	0.089178			0.0352931	0.107068	0.0356892
-97.9363		0.0856846	0.256412	0.0909668	-0.0294462	-0.0601465	-0.0901091	-0.039288	0.0880089			0.0381302	0.107151	0.035717
-97.838		0.0859986	0.261345	0.0951511	-0.0301392	-0.0616131	-0.0854042	-0.0319769	0.0871606			0.0408011	0.107545	0.0358482
-97.7397		0.086807	0.266055	0.0995345	-0.0309144	-0.0638484	-0.0811491	-0.0254403	0.08661			0.0433014	0.108249	0.0360829
-97.6414		0.0880113	0.27063	0.10398	-0.0316943	-0.0668028	-0.0774177	-0.0196699	0.0862958			0.0456096	0.109252	0.0364172
-97.5431		0.0896487	0.274798	0.108454	-0.0325431	-0.0703409	-0.0741969	-0.014837	0.0862986			0.0476887	0.110471	0.0368237
-97.4448		0.0919437	0.278551	0.112782	-0.0335297	-0.0743307	-0.0713897	-0.0109282	0.0866645			0.0495673	0.111866	0.0372888
-97.3465		0.0949973	0.28185	0.116967	-0.0347161	-0.0787568	-0.0691024	-0.00792151	0.0873064			0.0512159	0.113435	0.0378116
-97.2482		0.0987192	0.28473	0.120886	-0.0360066	-0.0835099	-0.0672029	-0.0059081	0.0882161			0.0526381	0.115131	0.0383771
-97.1499		0.103081	0.287276	0.124422	-0.0372706	-0.0885087	-0.0656301	-0.00482624	0.0894745			0.0538868	0.116931	0.0389771
-97.0516		0.108257	0.289382	0.127623	-0.0385588	-0.0936707	-0.0644974	-0.00465226	0.0911198			0.0549747	0.118831	0.0396103
-96.9533		0.114318	0.290594	0.130419	-0.0398258	-0.0989789	-0.0638383	-0.00538599	0.0930125			0.0558459	0.120716	0.0402386
-96.855		0.121145	0.290927	0.13269	-0.0411037	-0.104438	-0.0636201	-0.00704062	0.0950799			0.0564671	0.122588	0.0408625
-96.7567		0.128641	0.290355	0.134422	-0.0423099	-0.110063	-0.0636823	-0.00964828	0.0973405			0.0568396	0.124432	0.0414775
-96.6584		0.136728	0.288707	0.135591	-0.0433795	-0.115727	-0.0638992	-0.0131537	0.0997388			0.0569714	0.126181	0.0420604
-96.5601		0.145321	0.285897	0.136193	-0.0442567	-0.121427	-0.0643321	-0.0175893	0.102259			0.0568385	0.12784	0.0426133
-96.4618		0.154271	0.282106	0.136114	-0.0448542	-0.127135	-0.06502	-0.0227823	0.104804			0.0564529	0.129435	0.043145
-96.3635		0.16351	0.277438	0.1354	-0.0452068	-0.13279	-0.0660122	-0.0286394	0.107297			0.0558203	0.131002	0.0436675
-96.2652		0.172995	0.272065	0.134215	-0.0451244	-0.13836	-0.0674076	-0.0351188	0.109611			0.0549782	0.132591	0.044197
-96.1668		0.182853	0.266029	0.132566	-0.044545	-0.143817	-0.069195	-0.0421131	0.111703			0.0539694	0.134226	0.0447421
-96.0685		0.193048	0.259389	0.130458	-0.0435964	-0.149016	-0.071462	-0.0495733	0.113596			0.0527932	0.135933	0.0453111
-95.9702		0.203585	0.252361	0.127946	-0.0423251	-0.153883	-0.0742326	-0.0574384	0.115128			0.0514724	0.137759	0.0459196
-95.8719		0.214392	0.245091	0.125114	-0.0406457	-0.158542	-0.0774839	-0.0656967	0.116302			0.0500231	0.139755	0.0465851
-95.7736		0.225337	0.237679	0.121988	-0.03858	-0.163089	-0.0811329	-0.0743429	0.11716			0.0484469	0.141947	0.0473156
-95.6753		0.236264	0.230402	0.118547	-0.0361845	-0.167419	-0.0851885	-0.0832445	0.117763			0.0467909	0.144336	0.0481118
-95.577		0.247128	0.223226	0.114992	-0.0334723	-0.171597	-0.0896124	-0.0924149	0.118154			0.0450705	0.146931	0.0489769
-95.4787		0.257826	0.216451	0.111314	-0.0302747	-0.175634	-0.0943839	-0.101795	0.118272			0.0433333	0.149731	0.0499104
-95.3804		0.268134	0.210167	0.107671	-0.026597	-0.179571	-0.099468	-0.111333	0.118165			0.0415996	0.152707	0.0509024
-95.2821		0.277951	0.204323	0.10408	-0.0225438	-0.183374	-0.104673	-0.12102	0.117859			0.0398779	0.155794	0.0519315
-95.1838		0.287471	0.198833	0.100694	-0.0181479	-0.187059	-0.110045	-0.130729	0.117309			0.0381994	0.159002	0.0530008
-95.0855		0.296699	0.193844	0.097589	-0.0135119	-0.190625	-0.115548	-0.140536	0.11647			0.036562	0.162347	0.0541155
-94.9872		0.305514	0.189479	0.0946721	-0.00866689	-0.194063	-0.120952	-0.150402	0.115268			0.0349757	0.165761	0.0552538
-94.8889		0.313915	0.186101	0.0920082	-0.00362829	-0.197257	-0.126191	-0.160184	0.113719			0.0335254	0.169231	0.0564104
-94.7906		0.321976	0.183767	0.0897051	0.0016263	-0.200184	-0.131318	-0.169794	0.111938			0.0322639	0.172762	0.0575874
-94.6923		0.329677	0.182576	0.0876896	0.00701481	-0.202818	-0.136445	-0.179155	0.109797			0.0311791	0.176333	0.0587776
-94.594		0.336959	0.182774	0.0859434	0.0124662	-0.205182	-0.141625	-0.188332	0.107401			0.0302731	0.179972	0.0599906
-94.4957		0.343947	0.184582	0.0844104	0.0179179	-0.207234	-0.146694	-0.197259	0.10497			0.0296279	0.183695	0.0612315
-94.3974		0.350794	0.187711	0.0830995	0.0231815	-0.208971	-0.151598	-0.206029	0.102626			0.029215	0.18751	0.0625032
-94.2991		0.357618	0.192004	0.0819704	0.0282722	-0.210379	-0.156256	-0.21462	0.100306			0.0290297	0.1914	0.0638
-94.2008		0.364385	0.197654	0.0808374	0.0331926	-0.211454	-0.160548	-0.222975	0.0980624			0.0291015	0.195349	0.0651164
-94.1025		0.37107	0.204648	0.0798463	0.0379167	-0.212155	-0.164508	-0.231164	0.095957			0.0294413	0.199368	0.066456
-94.0042		0.377684	0.212757	0.0788584	0.0424844	-0.212564	-0.168005	-0.239183	0.0938723			0.0300104	0.203422	0.0678072
-93.9059		0.384149	0.221688	0.0778537	0.0468961	-0.212706	-0.170959	-0.247002	0.092012			0.0308012	0.20746	0.0691535
-93.8076		0.390509	0.231387	0.0768863	0.0510872	-0.212562	-0.173405	-0.254594	0.0904389			0.0318248	0.211489	0.0704963
-93.7092		0.396578	0.241788	0.0758827	0.0550979	-0.212088	-0.175503	-0.261981	0.0891213			0.0330304	0.215474	0.0718248
-93.6109		0.402321	0.252442	0.0749035	0.0589699	-0.211332	-0.177222	-0.269185	0.0880984			0.0343701	0.219366	0.0731221
-93.5126		0.407772	0.263418	0.0738492	0.0626324	-0.210213	-0.178587	-0.276035	0.0873054			0.0358586	0.223138	0.0743792
-93.4143		0.413035	0.274576	0.0727795	0.0658848	-0.208818	-0.17974	-0.282436	0.0867483			0.0374591	0.226802	0.0756006
-93.316		0.418115	0.285858	0.071669	0.0688303	-0.207203	-0.180758	-0.288387	0.0862933			0.0391409	0.230363	0.0767878
-93.2177		0.422992	0.297368	0.07049	0.0716568	-0.205334	-0.181735	-0.293812	0.085964			0.0409384	0.233829	0.0779431
-93.1194		0.427497	0.309118	0.0691647	0.0742951	-0.203109	-0.182787	-0.298772	0.0857921			0.0428128	0.237175	0.0790584
-93.0211	0.107595	0.431649	0.320867	0.0675265	0.0767552	-0.200605	-0.183962	-0.303142	0.0857135			0.0447109	0.227703	0.0759011
-92.9228	0.10796	0.435474	0.332685	0.0656246	0.0790772	-0.197846	-0.1854	-0.306894	0.0858406			0.0462802	0.230537	0.0768455
-92.8245	0.108522	0.438813	0.344454	0.0634117	0.081199	-0.19492	-0.187073	-0.310166	0.086227			0.0478297	0.233246	0.0777488
-92.7262	0.109239	0.441469	0.355918	0.0608332	0.0830806	-0.191805	-0.18895	-0.312954	0.0868459			0.0492973	0.235752	0.078584
-92.6279	0.110067	0.443554	0.36686	0.0580603	0.0846811	-0.188594	-0.190985	-0.315378	0.0878257			0.0506767	0.238069	0.0793562
-92.5296	0.111096	0.445063	0.377235	0.0550472	0.0859754	-0.185377	-0.193169	-0.317361	0.0890154			0.0519473	0.240182	0.0800606
-92.4313	0.112316	0.445928	0.386746	0.0518894	0.0870022	-0.182149	-0.195668	-0.318864	0.0901668			0.0530407	0.24204	0.08068
-92.333	0.113819	0.44592	0.395442	0.0486269	0.087886	-0.178874	-0.198466	-0.319953	0.0912075			0.0539566	0.243615	0.081205
-92.2347	0.115723	0.444813	0.403336	0.0452887	0.0886204	-0.17558	-0.201592	-0.320659	0.0922244			0.0546861	0.244884	0.0816282
-92.1364	0.117912	0.442736	0.410232	0.041961	0.0890978	-0.17225	-0.204989	-0.321086	0.0931314			0.0551938	0.245843	0.0819478
-92.0381	0.120352	0.439594	0.416255	0.0385779	0.0893333	-0.168877	-0.20854	-0.321265	0.0938237			0.0554727	0.246485	0.0821615
-91.9398	0.122882	0.435302	0.421677	0.0352692	0.0893535	-0.165406	-0.212288	-0.321196	0.0943805			0.0555527	0.246836	0.0822786
-91.8415	0.125439	0.429903	0.426532	0.0320274	0.0891546	-0.161855	-0.216296	-0.320962	0.094705			0.0554055	0.246935	0.0823118
-91.7432	0.128044	0.423443	0.430809	0.028788	0.0887411	-0.158169	-0.220517	-0.320564	0.094675			0.0550279	0.246783	0.082261
-91.6449	0.130607	0.416179	0.434606	0.0256007	0.0880023	-0.154335	-0.224825	-0.319999	0.0943335			0.0544633	0.246422	0.0821406
-91.5466	0.133102	0.408265	0.438354	0.0225058	0.0869299	-0.150332	-0.229225	-0.319274	0.0936673			0.053777	0.245954	0.0819846
-91.4483	0.135419	0.399789	0.441797	0.0194712	0.0854825	-0.146192	-0.233684	-0.318566	0.0927174			0.0529149	0.24538	0.0817933
-91.35	0.137573	0.390719	0.444958	0.0164098	0.0836787	-0.141929	-0.238031	-0.317955	0.0915482			0.0518857	0.244698	0.0815662
-91.2517	0.139625	0.381218	0.447763	0.0132556	0.0814622	-0.137432	-0.242123	-0.317475	0.0902065			0.0507224	0.243906	0.0813019
-91.1533	0.141548	0.371348	0.450031	0.00997055	0.078684	-0.132713	-0.245995	-0.31726	0.0886579			0.0493635	0.243005	0.0810017
-91.055	0.143379	0.361135	0.451825	0.00663021	0.0754675	-0.127937	-0.249403	-0.317334	0.0868633			0.0478474	0.241999	0.0806664
-90.9567	0.145196	0.3505	0.453053	0.00348537	0.0719619	-0.122993	-0.252314	-0.317713	0.0849617			0.0462375	0.240852	0.0802841
-90.8584	0.147002	0.339505	0.453536	0.00057841	0.0681331	-0.117961	-0.254803	-0.318434	0.0828809			0.0444931	0.23956	0.0798534
-90.7601	0.14882	0.328227	0.453315	-0.00202674	0.0639906	-0.112864	-0.257042	-0.319436	0.0806048			0.0426209	0.238157	0.0793858
-90.6618	0.150634	0.316802	0.452545	-0.00433062	0.0595936	-0.107783	-0.259014	-0.320751	0.0781067			0.0406446	0.2367	0.0788999
-90.5635	0.152491	0.305317	0.451489	-0.00632566	0.0550035	-0.102693	-0.260736	-0.32229	0.0754046			0.0386289	0.235239	0.0784129
-90.4652	0.154301	0.293882	0.449908	-0.00785105	0.0502894	-0.0975846	-0.26223	-0.324066	0.0725528			0.0365778	0.233741	0.0779135
-90.3669	0.156007	0.282535	0.448001	-0.00901619	0.0454833	-0.0925276	-0.263479	-0.326134	0.0695806			0.0344944	0.232259	0.0774196
-90.2686	0.157545	0.271463	0.446042	-0.00987234	0.0405939	-0.0875968	-0.264498	-0.328406	0.0665787			0.0324277	0.230859	0.076953
-90.1703	0.158816	0.260696	0.444194	-0.0105798	0.0356124	-0.082796	-0.265334	-0.330905	0.0636124			0.0303686	0.229583	0.0765276
-90.072	0.159871	0.250145	0.442443	-0.0112061	0.0306376	-0.0781693	-0.266171	-0.333502	0.0607885			0.0283152	0.228427	0.0761425
-89.9737	0.160683	0.239898	0.440587	-0.0118296	0.025686	-0.0737869	-0.267113	-0.336103	0.0582119			0.0262482	0.22736	0.0757867
-89.8754	0.161331	0.230023	0.438507	-0.0125045	0.0206826	-0.0697824	-0.2682	-0.338751	0.0559089			0.0241351	0.226384	0.0754613
-89.7771	0.161737	0.220453	0.436257	-0.013205	0.015643	-0.0661245	-0.269425	-0.341401	0.0540144			0.0219944	0.225482	0.0751606
-89.6788	0.161828	0.211137	0.433642	-0.0138699	0.0106232	-0.0628271	-0.270817	-0.344063	0.0527334			0.0198208	0.224606	0.0748687
-89.5805	0.16172	0.201997	0.430626	-0.0144894	0.0056684	-0.0599436	-0.272404	-0.346682	0.0519762			0.0176076	0.223739	0.0745798
-89.4822	0.161434	0.192902	0.426784	-0.0151565	0.000778437	-0.0574614	-0.274267	-0.349188	0.051582			0.0152674	0.222777	0.074259
-89.3839	0.160991	0.183816	0.422466	-0.015847	-0.00392937	-0.0553445	-0.276397	-0.351494	0.0515327			0.012866	0.221766	0.0739221
-89.2856	0.160414	0.17445	0.417769	-0.0165522	-0.00836654	-0.0535281	-0.278835	-0.353628	0.0518723			0.0103995	0.220712	0.0735707
-89.1873	0.159627	0.164646	0.412785	-0.0172576	-0.0126099	-0.0520407	-0.281728	-0.355581	0.052707			0.00783864	0.219641	0.0732137
-89.089	0.158644	0.154486	0.407694	-0.0179787	-0.0165596	-0.0509394	-0.284999	-0.357271	0.0541378			0.00524603	0.218579	0.0728596
-88.9907	0.157396	0.144024	0.402421	-0.018807	-0.0202655	-0.0501485	-0.288856	-0.358706	0.0561482			0.00257841	0.217547	0.0725156
-88.8924	0.155768	0.133305	0.397346	-0.0199644	-0.0238272	-0.0497581	-0.29331	-0.3599	0.0584645			-0.000208473	0.216624	0.0722082
-88.7941	0.153792	0.122397	0.392778	-0.0214997	-0.0272184	-0.0496741	-0.298218	-0.360911	0.0611349			-0.00304657	0.215876	0.0719587
-88.6957	0.151434	0.111417	0.388571	-0.0234461	-0.0304378	-0.0498506	-0.30334	-0.361755	0.0641411			-0.00591845	0.215245	0.0717485
-88.5974	0.148761	0.100386	0.38489	-0.025849	-0.033502	-0.0502549	-0.308675	-0.362369	0.0674412			-0.00879678	0.214762	0.0715875
-88.4991	0.145752	0.0892593	0.381495	-0.0287599	-0.0363922	-0.0508319	-0.314169	-0.362762	0.0710072			-0.0117113	0.21437	0.0714567
-88.4008	0.142463	0.0779619	0.378432	-0.0323871	-0.0391265	-0.0514806	-0.319631	-0.362934	0.0748375			-0.0146517	0.214053	0.071351
-88.3025	0.138934	0.0666192	0.375766	-0.0366883	-0.0417521	-0.0521236	-0.324999	-0.362862	0.0790483			-0.017562	0.213831	0.071277
-88.2042	0.135213	0.055306	0.373072	-0.0415537	-0.0443311	-0.0527409	-0.330233	-0.362595	0.0834987			-0.0204849	0.213625	0.0712084
-88.1059	0.131347	0.0442595	0.370134	-0.0466811	-0.0468021	-0.0533493	-0.335164	-0.362074	0.08808			-0.0233611	0.213361	0.0711202
-88.0076	0.127407	0.0335206	0.367127	-0.0518658	-0.049189	-0.0538605	-0.339654	-0.361399	0.0927525			-0.0261291	0.213068	0.0710227
-87.9093	0.123452	0.0230968	0.364104	-0.0570232	-0.0514788	-0.054296	-0.343627	-0.36061	0.0974049			-0.0287752	0.212747	0.0709155
-87.811	0.119535	0.0131042	0.360977	-0.0621668	-0.0536346	-0.0545907	-0.347109	-0.359688	0.101992			-0.0312869	0.212378	0.0707926
-87.7127	0.115784	0.00362337	0.357816	-0.0673344	-0.0556491	-0.0547779	-0.350096	-0.358616	0.106272			-0.0336644	0.211961	0.0706538
-87.6144	0.112246	-0.00523082	0.35504	-0.0725744	-0.0575043	-0.0548728	-0.352666	-0.357305	0.110111			-0.0358618	0.211569	0.0705232
-87.5161	0.108849	-0.0134664	0.352531	-0.0779208	-0.0590981	-0.0548115	-0.354856	-0.355853	0.113569			-0.0378952	0.211188	0.070396
-87.4178	0.105602	-0.0210702	0.350524	-0.0832685	-0.060415	-0.0546478	-0.356523	-0.354314	0.116781			-0.0397035	0.210853	0.0702844
-87.3195	0.102611	-0.0278296	0.348973	-0.0885645	-0.0615465	-0.0545459	-0.357642	-0.352637	0.119749			-0.0412703	0.210545	0.0701818
-87.2212	0.0998362	-0.0332872	0.347725	-0.0937115	-0.0625326	-0.054591	-0.358192	-0.350835	0.122309			-0.0425866	0.210207	0.0700692
-87.1229	0.0973214	-0.0374073	0.346676	-0.0986503	-0.0632197	-0.0547857	-0.358142	-0.348885	0.124362			-0.0436367	0.209788	0.0699294
-87.0246	0.0950516	-0.0402709	0.345724	-0.103248	-0.0636661	-0.0551434	-0.357561	-0.346689	0.125848			-0.0444395	0.209243	0.0697477
-86.9263	0.093127	-0.0418807	0.344726	-0.107367	-0.0638944	-0.0557046	-0.356378	-0.344228	0.126881			-0.0449687	0.208533	0.0695109
-86.828	0.0915603	-0.0421944	0.343423	-0.110886	-0.0639083	-0.0563969	-0.354611	-0.341444	0.127713			-0.0451939	0.207612	0.069204
-86.7297	0.0903212	-0.0414044	0.34154	-0.113748	-0.0637022	-0.0573096	-0.352352	-0.338226	0.128342			-0.045171	0.206414	0.0688046
-86.6314	0.0894897	-0.0396293	0.339157	-0.115918	-0.0632722	-0.0584588	-0.349669	-0.334606	0.128763			-0.0449049	0.204973	0.0683244
-86.5331	0.0890462	-0.0369441	0.336061	-0.117255	-0.0626822	-0.0597523	-0.346553	-0.330609	0.129006			-0.0444091	0.203244	0.067748
-86.4348	0.0889785	-0.0334446	0.332411	-0.117805	-0.0618756	-0.0613289	-0.34309	-0.326277	0.129065			-0.0437075	0.201283	0.0670942
-86.3365	0.0892752	-0.02921	0.328466	-0.117403	-0.0607912	-0.0632936	-0.339534	-0.321643	0.128865			-0.0428076	0.199179	0.0663929
-86.2381	0.0899136	-0.0245425	0.324263	-0.116077	-0.0593959	-0.0656342	-0.335933	-0.31672	0.128368			-0.0417508	0.196948	0.0656492
-86.1398	0.0908513	-0.0194994	0.320149	-0.113852	-0.0575646	-0.0682941	-0.33231	-0.311499	0.127724			-0.0404771	0.194679	0.064893
-86.0415	0.0920799	-0.0142201	0.316291	-0.110994	-0.0554068	-0.0713147	-0.32891	-0.306034	0.126985			-0.0390582	0.192478	0.0641594
-85.9432	0.0934815	-0.00871369	0.312591	-0.107721	-0.052987	-0.0747854	-0.325772	-0.300357	0.126043			-0.0375801	0.190336	0.0634454
-85.8449	0.0950401	-0.00292894	0.309151	-0.104097	-0.0503867	-0.0786171	-0.322891	-0.294467	0.124992			-0.0360227	0.188292	0.062764
-85.7466	0.0966804	0.00300055	0.305987	-0.100157	-0.0476078	-0.0828009	-0.320107	-0.288374	0.123786			-0.0343992	0.186321	0.0621069
-85.6483	0.0983319	0.00898766	0.302873	-0.0958313	-0.0446098	-0.0872741	-0.317349	-0.282088	0.122556			-0.0327115	0.184375	0.0614582
-85.55	0.099978	0.0148513	0.299519	-0.0911769	-0.0414807	-0.0920266	-0.314519	-0.27566	0.121303			-0.0310234	0.18239	0.0607965
-85.4517	0.101673	0.0206365	0.295971	-0.0862543	-0.0384296	-0.0970565	-0.311519	-0.269023	0.120068			-0.029326	0.180368	0.0601225
-85.3534	0.103429	0.0262891	0.292245	-0.0811983	-0.0354495	-0.102269	-0.308414	-0.262162	0.118903			-0.0276252	0.178333	0.0594442
-85.2551	0.105187	0.0314999	0.288073	-0.0760851	-0.0324411	-0.107487	-0.305323	-0.255159	0.117828			-0.0259898	0.176248	0.0587493
-85.1568	0.107021	0.0361041	0.283511	-0.0708898	-0.0294193	-0.112599	-0.302324	-0.247952	0.116955			-0.0243993	0.174135	0.0580449
-85.0585	0.108916	0.0401588	0.278766	-0.0656934	-0.0265431	-0.117583	-0.29938	-0.240612	0.116298			-0.0228525	0.17204	0.0573467
-84.9602	0.110902	0.0436983	0.273873	-0.0605754	-0.0237546	-0.122357	-0.296424	-0.233368	0.115827			-0.0213531	0.169987	0.0566623
-84.8619	0.112904	0.0467775	0.269075	-0.0557599	-0.0210255	-0.126843	-0.293368	-0.226216	0.115448			-0.0198895	0.167989	0.0559964
-84.7636	0.115071	0.0494138	0.264431	-0.0512891	-0.0183578	-0.131075	-0.290158	-0.219247	0.114933			-0.0184752	0.16605	0.05535
-84.6653	0.117434	0.0517337	0.260151	-0.0471663	-0.0157163	-0.13496	-0.286727	-0.21253	0.114187			-0.0170659	0.164192	0.0547306
-84.567	0.119932	0.0538706	0.256271	-0.0434855	-0.0130718	-0.138445	-0.283149	-0.206058	0.113215			-0.0156577	0.162424	0.0541413
-84.4687	0.122565	0.0558527	0.25302	-0.0403197	-0.0103395	-0.141631	-0.279438	-0.199925	0.112061			-0.0142394	0.160811	0.0536037
-84.3704	0.125402	0.0576915	0.250298	-0.0375882	-0.00755008	-0.144363	-0.27558	-0.194069	0.110746			-0.0127792	0.159309	0.0531032
-84.2721	0.128487	0.0596107	0.247808	-0.0353006	-0.0048166	-0.14655	-0.271485	-0.18845	0.109342			-0.0112616	0.15785	0.0526166
-84.1738	0.13187	0.0618934	0.245263	-0.0333238	-0.00215533	-0.148317	-0.267121	-0.183072	0.107795			-0.00968527	0.156394	0.0521314
-84.0755	0.135537	0.0644598	0.242695	-0.0317133	0.000333247	-0.149685	-0.262547	-0.177877	0.105985			-0.00809036	0.154938	0.0516461
-83.9772	0.13949	0.0672572	0.240034	-0.0303259	0.00267949	-0.150559	-0.257605	-0.172845	0.103967			-0.00643413	0.153429	0.051143
-83.8789	0.143814	0.0702474	0.237079	-0.0290177	0.00486896	-0.15089	-0.252258	-0.167916	0.101966			-0.00467838	0.151836	0.050612
-83.7805	0.148482	0.0732378	0.233633	-0.0277485	0.0070034	-0.150659	-0.246588	-0.163004	0.0999038			-0.00285988	0.150109	0.0500364
-83.6822	0.153548	0.0762805	0.22988	-0.0264139	0.00910591	-0.149825	-0.240718	-0.158097	0.0979458			-0.000921461	0.148322	0.0494406
-83.5839	0.158961	0.0795281	0.225945	-0.0250272	0.0111057	-0.148368	-0.234706	-0.153254	0.0961033			0.00114299	0.146517	0.0488389
-83.4856	0.164709	0.0830484	0.222041	-0.0235494	0.0130515	-0.146357	-0.228593	-0.148538	0.0943361			0.0033499	0.144757	0.0482522
-83.3873	0.170715	0.0867672	0.218281	-0.0217383	0.0151193	-0.143902	-0.222518	-0.144007	0.0926903			0.00571199	0.143092	0.0476973
-83.289	0.176929	0.0907058	0.214552	-0.0194448	0.0172718	-0.141098	-0.216516	-0.139691	0.0910576			0.00819634	0.141511	0.0471704
-83.1907	0.183278	0.0949341	0.211178	-0.0166619	0.0194721	-0.138015	-0.210559	-0.135606	0.0894817			0.0108335	0.140071	0.0466904
-83.0924	0.189677	0.0993042	0.208254	-0.0135863	0.0217677	-0.13474	-0.204608	-0.131802	0.0878959			0.0135736	0.138775	0.0462582
-82.9941	0.196081	0.103759	0.205484	-0.0101406	0.0242376	-0.131289	-0.198741	-0.12818	0.0862825			0.016388	0.137566	0.0458554
-82.8958	0.202464	0.10832	0.202963	-0.00633059	0.0268036	-0.127696	-0.193124	-0.124564	0.0846606			0.0192774	0.136471	0.0454904
-82.7975	0.208731	0.112738	0.200567	-0.00197617	0.0294656	-0.124004	-0.187903	-0.12095	0.0830361			0.0221894	0.135464	0.0451547
-82.6992	0.214678	0.116936	0.198339	0.00292702	0.0321811	-0.12015	-0.183084	-0.117287	0.0816451			0.0251317	0.13451	0.0448367
-82.6009	0.220257	0.120804	0.196097	0.00834461	0.0348875	-0.116159	-0.178671	-0.113603	0.080589			0.0280606	0.133574	0.0445246
-82.5026	0.225424	0.124263	0.19375	0.0144221	0.0375664	-0.112114	-0.17463	-0.109859	0.079916			0.0309711	0.132625	0.0442082
-82.4043	0.23012	0.127265	0.19104	0.0210625	0.0401164	-0.107982	-0.170924	-0.106032	0.0796604			0.0338139	0.131603	0.0438676
-82.306	0.23418	0.129667	0.188051	0.0281498	0.0425103	-0.103708	-0.16758	-0.102215	0.079771			0.0365363	0.130491	0.0434972
-82.2077	0.237496	0.131361	0.184996	0.0355581	0.044774	-0.0993206	-0.164621	-0.0984487	0.0803257			0.0391244	0.129308	0.0431026
-82.1094	0.240021	0.132194	0.182204	0.0432029	0.0467963	-0.0947057	-0.162055	-0.0947881	0.0813043			0.0415748	0.128067	0.0426889
-82.0111	0.241805	0.132196	0.179414	0.0510302	0.0486073	-0.0898751	-0.15984	-0.091326	0.0826424			0.0438504	0.126751	0.0422503
-81.9128	0.242767	0.131384	0.176783	0.0588872	0.0502016	-0.0849363	-0.158026	-0.0881234	0.0842331			0.0459078	0.125396	0.0417986
-81.8145	0.24288	0.129756	0.174541	0.0667053	0.0516679	-0.0799226	-0.156662	-0.08525	0.0858713			0.047732	0.124042	0.0413474
-81.7162	0.242163	0.127557	0.172861	0.0743986	0.0529011	-0.0749016	-0.155726	-0.0828928	0.0875751			0.0493261	0.122761	0.0409203
-81.6179	0.240591	0.124737	0.17164	0.081859	0.0539093	-0.0700136	-0.155305	-0.0810338	0.0891823			0.0506186	0.12156	0.0405201
-81.5196	0.238248	0.121186	0.170928	0.0889288	0.0547844	-0.0653012	-0.155476	-0.0796717	0.0906267			0.0515837	0.120473	0.0401578
-81.4213	0.235174	0.116977	0.17057	0.0956072	0.0555128	-0.0605859	-0.156203	-0.0787594	0.0920472			0.05226	0.119477	0.0398257
-81.3229	0.231395	0.112152	0.170369	0.101604	0.0560843	-0.0557679	-0.15736	-0.0782583	0.0933825			0.0526221	0.118514	0.0395048
-81.2246	0.226984	0.106828	0.170329	0.106907	0.0564697	-0.0508157	-0.158898	-0.0781377	0.094633			0.0526998	0.117596	0.0391988
-81.1263	0.22202	0.101113	0.170223	0.111537	0.0566264	-0.0457085	-0.160744	-0.0783748	0.0956693			0.0524847	0.1167	0.0389001
-81.028	0.216515	0.0951558	0.169777	0.115637	0.0565342	-0.0403822	-0.162918	-0.0789278	0.096595			0.0519984	0.115818	0.038606
-80.9297	0.210503	0.0889684	0.169174	0.119166	0.0561412	-0.0349384	-0.16526	-0.0798955	0.097497			0.0512617	0.114973	0.0383245
-80.8314	0.203972	0.0824442	0.168348	0.122143	0.0555315	-0.0293358	-0.167589	-0.0813634	0.0983641			0.0502794	0.114132	0.0380441
-80.7331	0.197062	0.0759171	0.167338	0.124511	0.0546517	-0.023548	-0.169914	-0.0833688	0.0993337			0.0491091	0.113346	0.037782
-80.6348	0.189867	0.0695453	0.166118	0.12633	0.0534986	-0.0176564	-0.172347	-0.0860189	0.100284			0.0477356	0.112677	0.0375591
-80.5365	0.182418	0.0635216	0.164701	0.127616	0.0521613	-0.0116722	-0.174944	-0.0892482	0.101123			0.0461863	0.11214	0.03738
-80.4382	0.174769	0.0578922	0.16326	0.128244	0.0506837	-0.00558779	-0.177785	-0.0930787	0.101839			0.0444706	0.111773	0.0372578
-80.3399	0.166976	0.0529038	0.161811	0.128537	0.0491324	0.000575065	-0.1809	-0.0974616	0.102332			0.0426563	0.111614	0.0372045
-80.2416	0.159185	0.0488317	0.160327	0.128669	0.0475454	0.00665998	-0.184199	-0.102269	0.1026			0.0408167	0.11166	0.0372198
-80.1433	0.15146	0.0457514	0.158742	0.128747	0.0460387	0.0125913	-0.187617	-0.107455	0.102515			0.0389748	0.111888	0.0372961
-80.045	0.143801	0.0436755	0.1566	0.128878	0.0447829	0.0183321	-0.191101	-0.112937	0.102166			0.037133	0.112232	0.0374106
-79.9467	0.136202	0.0426283	0.153965	0.129196	0.0437053	0.023898	-0.194671	-0.118591	0.101696			0.0353366	0.1127	0.0375666
-79.8484	0.128773	0.0426541	0.150543	0.130004	0.0428624	0.0293549	-0.19833	-0.124343	0.101167			0.0336316	0.113292	0.0377641
-79.7501	0.121461	0.0437437	0.146252	0.131322	0.042218	0.0346815	-0.202044	-0.130086	0.100736			0.0320315	0.113991	0.0379968
-79.6518	0.114248	0.0458127	0.141093	0.133225	0.0418111	0.039888	-0.205778	-0.135704	0.100459			0.0305616	0.114791	0.0382637
-79.5535	0.107133	0.0487584	0.134896	0.135711	0.0416095	0.0450826	-0.209348	-0.141265	0.100423			0.0292223	0.115669	0.0385564
-79.4552	0.100089	0.0526317	0.127518	0.138969	0.0414673	0.0501458	-0.212593	-0.146649	0.100612			0.0280213	0.116597	0.0388656
-79.3569	0.0931119	0.0573831	0.119039	0.143014	0.0413563	0.0549079	-0.215537	-0.151864	0.10082			0.0269147	0.117603	0.0392012
-79.2586	0.0861681	0.0630471	0.10959	0.147936	0.0412548	0.0593161	-0.21824	-0.156962	0.101064			0.0259082	0.118769	0.0395895
-79.1603	0.079187	0.0695503	0.0992664	0.153541	0.0411982	0.0634431	-0.220707	-0.16195	0.101383			0.0249904	0.120118	0.0400395
-79.062	0.0721956	0.0767374	0.0881659	0.159812	0.0411817	0.0672639	-0.222907	-0.16681	0.101856			0.0241663	0.121685	0.0405618
-78.9637	0.065224	0.0846081	0.0766088	0.16669	0.0412536	0.0707212	-0.224826	-0.171562	0.102375			0.0234547	0.123505	0.0411682
-78.8653	0.058291	0.0931412	0.0646062	0.174027	0.041472	0.0739771	-0.226639	-0.176188	0.102825			0.0228347	0.125615	0.0418717
-78.767	0.0513853	0.102371	0.0521161	0.181803	0.0417773	0.0769403	-0.228375	-0.180685	0.103233			0.0222852	0.128038	0.0426793
-78.6687	0.0444442	0.112089	0.0391294	0.189957	0.0422275	0.0795362	-0.229924	-0.18502	0.103393			0.0217592	0.13072	0.0435733
-78.5704	0.0375177	0.122023	0.0257135	0.198391	0.04289	0.0817146	-0.231167	-0.189058	0.103299			0.0212582	0.133591	0.0445302
-78.4721	0.0305951	0.131968	0.0119405	0.206969	0.0436745	0.0835453	-0.232045	-0.192821	0.10305			0.0207639	0.136618	0.0455395
-78.3738	0.0237157	0.141747	-0.00231703	0.21552	0.0445385	0.0851046	-0.232443	-0.196306	0.102539			0.0202332	0.139734	0.046578
-78.2755	0.0169181	0.151013	-0.016913	0.223604	0.045473	0.0864654	-0.232304	-0.199503	0.101781			0.0196148	0.142822	0.0476074
-78.1772	0.0101805	0.159689	-0.031796	0.231013	0.0463567	0.0876992	-0.231676	-0.202474	0.100852			0.0188716	0.145853	0.0486176
-78.0789	0.00353557	0.167559	-0.0468991	0.237639	0.0470559	0.0888783	-0.230589	-0.205158	0.099793			0.0179794	0.148767	0.049589
-77.9806	-0.00295671	0.174588	-0.0618548	0.24324	0.0474879	0.0899353	-0.229047	-0.207579	0.0986367			0.016939	0.151483	0.0504943
-77.8823	-0.00933995	0.180745	-0.076528	0.247645	0.047706	0.0908448	-0.226993	-0.209812	0.0973064			0.0157305	0.153933	0.0513109
-77.784	-0.015614	0.186059	-0.0905263	0.250551	0.0476478	0.0915984	-0.224344	-0.211843	0.0958286			0.014373	0.156	0.0520001
-77.6857	-0.0216955	0.190558	-0.103907	0.251981	0.0472516	0.0922116	-0.221073	-0.21369	0.0941116			0.0128609	0.157662	0.0525539
-77.5874	-0.0275385	0.194152	-0.116682	0.251845	0.0464924	0.0927122	-0.21717	-0.2153	0.0920783			0.0111765	0.158858	0.0529526
-77.4891	-0.0330992	0.197002	-0.1286	0.250173	0.0453745	0.0930648	-0.212712	-0.216576	0.0897189			0.00937169	0.159569	0.0531897
-77.3908	-0.0383273	0.199107	-0.139369	0.24694	0.0440605	0.0934511	-0.207842	-0.217567	0.0870931			0.00750504	0.159792	0.0532641
-77.2925	-0.0432543	0.200508	-0.149036	0.242183	0.0426051	0.0939224	-0.202524	-0.218166	0.084367			0.00562287	0.159521	0.0531735
-77.1942	-0.0477448	0.201124	-0.157502	0.235925	0.0410189	0.0945432	-0.196707	-0.218194	0.0814854			0.00377216	0.158687	0.0528955
-77.0959	-0.0517775	0.200963	-0.164788	0.228247	0.0394097	0.0952192	-0.190405	-0.217567	0.0784824			0.00197592	0.157287	0.0524289
-76.9976	-0.0553659	0.20013	-0.170867	0.219074	0.0378265	0.0959757	-0.183724	-0.216302	0.0754303			0.000241969	0.155341	0.0517805
-76.8993	-0.0584885	0.198659	-0.175773	0.208391	0.0362587	0.0968424	-0.176673	-0.214284	0.0723459			-0.00141352	0.152843	0.0509477
-76.801	-0.0611449	0.19664	-0.17957	0.19646	0.0347079	0.0977084	-0.169157	-0.211453	0.0693584			-0.002939	0.149837	0.0499455
-76.7027	-0.0632495	0.194074	-0.18216	0.183311	0.0331833	0.0986464	-0.161249	-0.207686	0.0664457			-0.00429823	0.146312	0.0487708
-76.6044	-0.0647577	0.191096	-0.183532	0.168965	0.0317047	0.099767	-0.152966	-0.20294	0.063788			-0.00543041	0.142318	0.0474393
-76.5061	-0.0657464	0.187865	-0.183804	0.153482	0.0302434	0.101073	-0.144298	-0.197177	0.061486			-0.00631973	0.137925	0.0459748
-76.4077	-0.0662568	0.184512	-0.182892	0.137061	0.0288122	0.102449	-0.135297	-0.190392	0.0593726			-0.00695903	0.133183	0.0443944
-76.3094	-0.0663171	0.181308	-0.180764	0.120026	0.0273388	0.103818	-0.126008	-0.182605	0.0575579			-0.00729384	0.128208	0.0427359
-76.2111	-0.0660099	0.178392	-0.177523	0.102597	0.0258221	0.105051	-0.116554	-0.173887	0.0561648			-0.00732739	0.123115	0.0410385
-76.1128	-0.0653881	0.175607	-0.173108	0.084945	0.024368	0.106102	-0.106987	-0.164247	0.0551169			-0.00706573	0.117926	0.0393087
-76.0145	-0.0644726	0.173074	-0.167455	0.0672012	0.0229955	0.106937	-0.0973035	-0.153781	0.054414			-0.00648782	0.11271	0.0375699
-75.9162	-0.0632937	0.170935	-0.160688	0.0494886	0.0217257	0.107664	-0.0876572	-0.142418	0.053911			-0.00559235	0.107574	0.035858
-75.8179	-0.0617725	0.169153	-0.152776	0.0319484	0.0206019	0.108289	-0.0781234	-0.130132	0.0536136			-0.0043553	0.102568	0.0341894
-75.7196	-0.0599473	0.167636	-0.14396	0.0147044	0.0197177	0.108789	-0.0687888	-0.117002	0.0534486			-0.00282259	0.0977904	0.0325968
-75.6213	-0.0578448	0.166333	-0.134117	-0.00237981	0.019175	0.109171	-0.0597151	-0.103081	0.0534442			-0.0010017	0.0932919	0.0310973
-75.523	-0.0554917	0.165159	-0.123327	-0.0191264	0.0189564	0.109401	-0.0508435	-0.0884779	0.0536309			0.00109791	0.0891558	0.0297186
-75.4247	-0.0529471	0.164071	-0.111672	-0.0354769	0.019086	0.109499	-0.0421427	-0.0732318	0.0539761			0.00346245	0.0854731	0.028491
-75.3264	-0.0502888	0.162956	-0.0993218	-0.0516478	0.0194433	0.109376	-0.0336017	-0.0574277	0.0544576			0.00599395	0.0823451	0.0274484
-75.2281	-0.0475129	0.161761	-0.0863	-0.0676533	0.0198756	0.109058	-0.0252517	-0.0412656	0.0549945			0.00863401	0.0798829	0.0266276
-75.1298	-0.0446936	0.160465	-0.0728536	-0.0834938	0.0203188	0.108472	-0.0171635	-0.0249779	0.0555504			0.0112916	0.0782172	0.0260724
-75.0315	-0.0417701	0.158998	-0.0589415	-0.0990983	0.0206138	0.10754	-0.00935546	-0.00870317	0.0560954			0.013931	0.0773683	0.0257894
-74.9332	-0.0388401	0.157248	-0.0444844	-0.114343	0.0207018	0.106199	-0.00177185	0.00750363	0.0564973			0.0165235	0.0773087	0.0257696
-74.8349	-0.0360077	0.155007	-0.0296231	-0.129194	0.0204543	0.104525	0.00554313	0.0234461	0.0567243			0.0189861	0.0780241	0.026008
-74.7366	-0.0333019	0.152162	-0.0144072	-0.143802	0.0197958	0.102587	0.0125151	0.0390282	0.0566838			0.0212512	0.0795075	0.0265025
-74.6383	-0.0308647	0.148713	0.0011244	-0.158165	0.0187191	0.100341	0.0191776	0.0540673	0.0564046			0.0232797	0.0817171	0.027239
-74.54	-0.0287421	0.144612	0.0170528	-0.172145	0.0171193	0.097683	0.0254493	0.068503	0.0557618			0.0250327	0.0845303	0.0281768
-74.4417	-0.0269736	0.139858	0.0333283	-0.185738	0.0150098	0.094774	0.0312325	0.0821088	0.0546852			0.0264762	0.0878784	0.0292928
-74.3434	-0.0255174	0.13433	0.0497517	-0.198978	0.0123923	0.0916878	0.036547	0.0948086	0.0533848			0.0276007	0.0916766	0.0305589
-74.2451	-0.0243688	0.127907	0.066424	-0.211955	0.00937275	0.0884005	0.0414171	0.106625	0.0517275			0.0283945	0.0958572	0.0319524
-74.1468	-0.0234957	0.120605	0.0833718	-0.224627	0.00601412	0.0849689	0.0458754	0.117592	0.0495223			0.0288696	0.100358	0.0334526
-74.0485	-0.0228725	0.112624	0.100334	-0.237086	0.00228287	0.0814202	0.0499554	0.127677	0.0467706			0.0290118	0.10516	0.0350533
-73.9501	-0.0225322	0.104016	0.117118	-0.249346	-0.00175692	0.0778176	0.0536591	0.136819	0.0435143			0.0288122	0.1102	0.0367335
-73.8518	-0.0225213	0.0946611	0.133716	-0.261344	-0.00607062	0.0741034	0.0571452	0.144925	0.0398616			0.0282751	0.115393	0.0384642
-73.7535	-0.0228627	0.0846014	0.149932	-0.273165	-0.0107119	0.0703008	0.060457	0.151887	0.0357965			0.0273594	0.120695	0.0402316
-73.6552	-0.0235292	0.0738549	0.165858	-0.284755	-0.0157302	0.0664486	0.0635977	0.157822	0.0312945			0.0260957	0.126081	0.042027
-73.5569	-0.024578	0.062549	0.181487	-0.295876	-0.0211478	0.0626331	0.0664815	0.162744	0.0263722			0.0245184	0.131469	0.0438231
-73.4586	-0.0259818	0.0508613	0.196841	-0.306633	-0.0268655	0.0588842	0.0688894	0.166654	0.02112			0.022641	0.136859	0.0456196
-73.3603	-0.0277026	0.0388783	0.211861	-0.316911	-0.0328982	0.0552521	0.0707137	0.16949	0.0155364			0.0204688	0.142177	0.0473924
-73.262	-0.0297149	0.0267593	0.226517	-0.326293	-0.0392167	0.0517278	0.0719621	0.171311	0.00971444			0.0180851	0.147297	0.0490989
-73.1637	-0.0319808	0.0144717	0.240848	-0.3348	-0.0455973	0.0482998	0.0725827	0.172155	0.00366941			0.0155166	0.152204	0.0507347
-73.0654	-0.0345423	0.00227982	0.25494	-0.342299	-0.0519888	0.0450653	0.0725546	0.17202	-0.00244467			0.0128428	0.156869	0.0522898
-72.9671	-0.0374817	-0.00974085	0.268716	-0.348775	-0.0583078	0.0422302	0.0718741	0.170949	-0.00870179			0.0100846	0.161275	0.0537582
-72.8688	-0.0406954	-0.0214793	0.281845	-0.354133	-0.064466	0.0398582	0.070516	0.168945	-0.0150065			0.00726499	0.165319	0.0551064
-72.7705	-0.0440542	-0.0326846	0.294291	-0.358287	-0.0703304	0.0378119	0.0685243	0.166128	-0.0212377			0.00446245	0.16896	0.0563201
-72.6722	-0.0475089	-0.0432398	0.306167	-0.361259	-0.0757393	0.0360733	0.0658561	0.162572	-0.0273467			0.00173042	0.172207	0.0574025
-72.5739	-0.0508744	-0.0530569	0.317375	-0.363015	-0.0806407	0.0346533	0.0624796	0.158392	-0.0333223			-0.000889973	0.175026	0.0583421
-72.4756	-0.054096	-0.0621433	0.327785	-0.363691	-0.0849393	0.0336017	0.0585001	0.15361	-0.0391097			-0.00338696	0.177417	0.0591389
-72.3773	-0.0570918	-0.0704948	0.337536	-0.363317	-0.0886505	0.0327383	0.0539628	0.148367	-0.0446416			-0.00573242	0.179416	0.0598053
-72.279	-0.0598162	-0.0779981	0.346787	-0.361978	-0.0917989	0.0319886	0.0488587	0.142691	-0.050005			-0.00791887	0.181072	0.0603575
-72.1807	-0.0622997	-0.084728	0.355371	-0.35971	-0.0943974	0.0314382	0.0431321	0.136533	-0.0550176			-0.00996428	0.182353	0.0607844
-72.0824	-0.0645045	-0.0906858	0.363192	-0.356565	-0.0966196	0.0310978	0.0368154	0.129888	-0.0595079			-0.0118766	0.183252	0.061084
-71.9841	-0.0664487	-0.0959735	0.370359	-0.352414	-0.0985157	0.0309722	0.0299663	0.122804	-0.0633877			-0.0136265	0.183781	0.0612602
-71.8858	-0.0681241	-0.100636	0.376818	-0.347261	-0.100156	0.0310784	0.0225837	0.115402	-0.0666769			-0.0152191	0.183949	0.0613165
-71.7875	-0.0695067	-0.104634	0.382641	-0.341148	-0.101591	0.0314759	0.0145761	0.107749	-0.0694068			-0.0166494	0.183797	0.0612656
-71.6892	-0.0707082	-0.107908	0.387778	-0.333987	-0.102772	0.0321564	0.0059516	0.0999274	-0.0714501			-0.0178903	0.183304	0.0611015
-71.5909	-0.0718205	-0.110423	0.392103	-0.325875	-0.10376	0.0330774	-0.00326205	0.0918268	-0.0727872			-0.0189912	0.182466	0.0608221
-71.4926	-0.0727946	-0.112197	0.395405	-0.317002	-0.104597	0.0340925	-0.0129239	0.0833948	-0.0734374			-0.0200067	0.181272	0.0604242
-71.3942	-0.0736274	-0.113293	0.397568	-0.307307	-0.105299	0.0351726	-0.0228231	0.0746936	-0.0734653			-0.0209311	0.179701	0.0599005
-71.2959	-0.0743287	-0.113847	0.398647	-0.297071	-0.105839	0.0362825	-0.0328893	0.0658167	-0.0728653			-0.0217882	0.177834	0.0592781
-71.1976	-0.0749232	-0.113902	0.398433	-0.286633	-0.106146	0.0374785	-0.0430131	0.0568074	-0.0717635			-0.022629	0.175684	0.0585614
-71.0993	-0.0754384	-0.113363	0.396915	-0.275993	-0.106302	0.0386944	-0.0531005	0.0477617	-0.070133			-0.0234397	0.173246	0.0577486
-71.001	-0.0758437	-0.112461	0.394095	-0.26533	-0.106304	0.0398516	-0.0630491	0.0388211	-0.0681065			-0.0242585	0.170562	0.0568541
-70.9027	-0.0761408	-0.11131	0.389834	-0.254679	-0.106154	0.040895	-0.0728083	0.0300063	-0.065573			-0.0251033	0.167594	0.0558646
-70.8044	-0.0763457	-0.109863	0.384245	-0.244276	-0.105903	0.0418616	-0.0823103	0.0213793	-0.062491			-0.025967	0.164401	0.0548004
-70.7061	-0.0765158	-0.108222	0.377488	-0.234187	-0.105589	0.0428516	-0.0914967	0.0129416	-0.0589568			-0.026854	0.161045	0.0536815
-70.6078	-0.0767155	-0.106485	0.369661	-0.224296	-0.105324	0.043841	-0.100199	0.00473404	-0.0550395			-0.0277581	0.157534	0.0525115
-70.5095	-0.0770804	-0.104737	0.360936	-0.214735	-0.105131	0.0448192	-0.108393	-0.0033264	-0.050747			-0.0287105	0.153939	0.051313
-70.4112	-0.0776405	-0.103059	0.351344	-0.205393	-0.105056	0.0458259	-0.116099	-0.0112975	-0.046154			-0.0297255	0.150259	0.0500862
-70.3129	-0.0783924	-0.101488	0.340825	-0.196165	-0.105088	0.0469394	-0.12332	-0.0191086	-0.0413285			-0.0307918	0.14647	0.0488234
-70.2146	-0.0793845	-0.100147	0.329185	-0.18704	-0.105103	0.0482192	-0.13008	-0.026672	-0.0361495			-0.0319081	0.142527	0.047509
-70.1163	-0.0806511	-0.0990331	0.316589	-0.177977	-0.105152	0.0496876	-0.136317	-0.0338761	-0.0307576			-0.0330541	0.138478	0.0461592
-70.018	-0.0822694	-0.0981248	0.30331	-0.168971	-0.105043	0.0514191	-0.142045	-0.040658	-0.0252814			-0.0341849	0.134402	0.0448006
-69.9197	-0.0841869	-0.097382	0.289373	-0.160227	-0.104643	0.05343	-0.147285	-0.04703	-0.019717			-0.0352964	0.130327	0.0434423
-69.8214	-0.0863301	-0.0967293	0.275052	-0.151796	-0.103887	0.0555531	-0.152045	-0.0530397	-0.0140954			-0.0363685	0.126319	0.0421065
-69.7231	-0.0886853	-0.0961835	0.26037	-0.143662	-0.102711	0.0577024	-0.15621	-0.0587385	-0.00844884			-0.0373962	0.122367	0.0407891
-69.6248	-0.0910739	-0.0958435	0.245546	-0.135849	-0.101134	0.0598374	-0.159793	-0.0640579	-0.0029132			-0.0383646	0.118526	0.0395087
-69.5265	-0.0933995	-0.0957112	0.230614	-0.128323	-0.0990531	0.0620094	-0.162814	-0.0689372	0.00256478			-0.0392277	0.114799	0.0382662
-69.4282	-0.0956237	-0.0958314	0.215821	-0.121053	-0.096427	0.0643672	-0.165331	-0.0732794	0.00799917			-0.0399287	0.111266	0.0370886
-69.3299	-0.097829	-0.0960934	0.201439	-0.114155	-0.0932825	0.0668685	-0.167428	-0.0770758	0.0133717			-0.0404649	0.108013	0.0360043
-69.2316	-0.100052	-0.0965254	0.187549	-0.107475	-0.0896756	0.0694948	-0.16912	-0.0803997	0.018771			-0.040826	0.105062	0.0350205
-69.1333	-0.102233	-0.0971513	0.174518	-0.100884	-0.085717	0.0722565	-0.170483	-0.0833027	0.0243295			-0.040963	0.102516	0.0341722
-69.035	-0.10435	-0.0980852	0.162249	-0.0943954	-0.0814505	0.0752064	-0.171592	-0.0858005	0.0301025			-0.0409017	0.100383	0.0334609
-68.9366	-0.106392	-0.0993954	0.150817	-0.0879089	-0.0769389	0.0783739	-0.172531	-0.0878921	0.0361667			-0.0406335	0.0986998	0.0328999
-68.8383	-0.108326	-0.100823	0.14058	-0.0813744	-0.0722014	0.081667	-0.173384	-0.0895784	0.0424241			-0.0401128	0.0975088	0.0325029
-68.74	-0.110171	-0.10246	0.131786	-0.0746225	-0.0672571	0.0849428	-0.174259	-0.0908321	0.0488633			-0.0393344	0.0968333	0.0322778
-68.6417	-0.111944	-0.104245	0.124185	-0.067629	-0.0621396	0.088144	-0.175194	-0.0917507	0.0555162			-0.0383397	0.0966026	0.0322009
-68.5434	-0.113591	-0.106099	0.117572	-0.0605314	-0.0568562	0.091216	-0.176219	-0.0923776	0.0624622			-0.0371583	0.0967596	0.0322532
-68.4451	-0.115115	-0.107905	0.111689	-0.0531358	-0.0514408	0.0941332	-0.177311	-0.0926103	0.069608			-0.0357876	0.0972023	0.0324008
-68.3468	-0.116545	-0.109543	0.106629	-0.0455998	-0.0458791	0.0968364	-0.178446	-0.0923703	0.077007			-0.0342123	0.0979142	0.0326381
-68.2485	-0.117907	-0.110967	0.102273	-0.0381501	-0.0401813	0.0993814	-0.179576	-0.091756	0.0846151			-0.0324742	0.0988587	0.0329529
-68.1502	-0.119172	-0.112009	0.0985918	-0.0306866	-0.0345215	0.101742	-0.180597	-0.0907592	0.0922603			-0.0305724	0.0999477	0.0333159
-68.0519	-0.120228	-0.112623	0.095481	-0.0233592	-0.0289276	0.103769	-0.181538	-0.0894704	0.100029			-0.0285408	0.101128	0.0337092
-67.9536	-0.121031	-0.112696	0.0927201	-0.016245	-0.0234846	0.10531	-0.182382	-0.0879588	0.10792			-0.0264274	0.102313	0.0341045
-67.8553	-0.121599	-0.11226	0.0904183	-0.00931518	-0.0182981	0.106306	-0.183101	-0.0861871	0.115767			-0.0242522	0.103467	0.0344891
-67.757	-0.121996	-0.111413	0.0883123	-0.00257311	-0.0133822	0.106938	-0.183668	-0.0842256	0.123561			-0.0220496	0.104582	0.0348605
-67.6587	-0.122208	-0.110068	0.0862877	0.00394889	-0.00881482	0.107254	-0.184128	-0.0820978	0.131249			-0.019842	0.105629	0.0352098
-67.5604	-0.122384	-0.108154	0.0842537	0.0101807	-0.00465786	0.107289	-0.184447	-0.0799064	0.13887			-0.0176617	0.106611	0.035537
-67.4621	-0.122512	-0.105606	0.082259	0.0162048	-0.000984826	0.106997	-0.184606	-0.0777186	0.146423			-0.0155048	0.107515	0.0358384
-67.3638	-0.122651	-0.10251	0.0801556	0.022055	0.00222349	0.106277	-0.184557	-0.0755281	0.153721			-0.0134237	0.108288	0.036096
-67.2655	-0.122715	-0.0989402	0.0777119	0.0277637	0.00495131	0.105182	-0.184328	-0.073328	0.16077			-0.0114369	0.108919	0.0363062
-67.1672	-0.122685	-0.094732	0.0746953	0.0333395	0.00717479	0.103684	-0.183885	-0.0710638	0.167427			-0.00956068	0.109337	0.0364457
-67.0689	-0.1226	-0.0899258	0.0710371	0.0386961	0.00901635	0.101676	-0.183193	-0.0686391	0.17355			-0.00782019	0.109504	0.0365014
-66.9706	-0.122473	-0.0844205	0.0669573	0.0438541	0.010598	0.0991408	-0.182183	-0.0660649	0.179027			-0.0061738	0.109411	0.0364703
-66.8723	-0.122261	-0.0781045	0.0625054	0.048709	0.0119422	0.0960509	-0.180792	-0.0634913	0.183723			-0.00463541	0.109023	0.036341
-66.774	-0.121944	-0.0711876	0.0573841	0.053093	0.0129791	0.0924356	-0.178884	-0.0609167	0.187681			-0.00326216	0.108321	0.0361071
-66.6757	-0.121434	-0.0636614	0.0514999	0.056966	0.0137521	0.0884131	-0.176354	-0.0584073	0.190777			-0.00204987	0.107276	0.0357586
-66.5774	-0.120654	-0.0556528	0.0451532	0.0602798	0.0142981	0.084002	-0.173197	-0.0558875	0.192996			-0.000962437	0.105908	0.0353025
-66.479	-0.119608	-0.0472588	0.0385745	0.0632571	0.0145812	0.0792961	-0.169426	-0.053357	0.194268			3.63461e-05	0.104255	0.0347516
-66.3807	-0.118255	-0.0386766	0.0321301	0.0657567	0.0145771	0.0743947	-0.165081	-0.05083	0.194665			0.000964501	0.102364	0.0341213
-66.2824	-0.116523	-0.0299801	0.025772	0.0678561	0.0142809	0.0693132	-0.160234	-0.04836	0.194228			0.00181707	0.100256	0.0334187
-66.1841	-0.11436	-0.0211548	0.019963	0.0697253	0.0136438	0.0639887	-0.154965	-0.045954	0.193032			0.00265758	0.0979741	0.032658
-66.0858	-0.111806	-0.0123614	0.0149493	0.0711819	0.0127381	0.0584866	-0.149349	-0.043674	0.191083			0.00347206	0.0955357	0.0318452
-65.9875	-0.108966	-0.00360715	0.0108568	0.0723776	0.0116367	0.0529581	-0.143414	-0.0415237	0.188348			0.00429616	0.0929658	0.0309886
-65.8892	-0.10582	0.00502948	0.00779078	0.0734318	0.0103174	0.0474828	-0.137172	-0.039521	0.18491			0.00516108	0.0902881	0.030096
-65.7909	-0.102384	0.0135284	0.00561018	0.0745018	0.00879585	0.0420503	-0.130747	-0.0377058	0.180818			0.00605189	0.0875437	0.0291812
-65.6926	-0.098709	0.0218246	0.00443361	0.0755858	0.00701914	0.0365394	-0.124192	-0.0359844	0.176074			0.00695459	0.0847364	0.0282455
-65.5943	-0.0948474	0.02984	0.00420405	0.0766563	0.00497426	0.0309805	-0.117583	-0.034363	0.170777			0.00784873	0.0819091	0.027303
-65.496	-0.0907107	0.0375235	0.00484798	0.0777215	0.00272456	0.0253467	-0.111036	-0.0328286	0.165016			0.00873397	0.0790927	0.0263642
-65.3977	-0.0863367	0.0447363	0.00626029	0.0785909	0.000288302	0.0196597	-0.104637	-0.0313588	0.158711			0.00954599	0.0762738	0.0254246
-65.2994	-0.0817567	0.0516458	0.00858605	0.0791603	-0.00239798	0.0139811	-0.0983676	-0.0300917	0.152073			0.0103147	0.0735172	0.0245057
-65.2011	-0.0770288	0.0582725	0.0120438	0.0795463	-0.0053142	0.00830773	-0.092147	-0.0291673	0.145032			0.0110606	0.0708474	0.0236158
-65.1028	-0.0720751	0.0644646	0.0166796	0.0797359	-0.00834589	0.00269932	-0.0859744	-0.0286832	0.137748			0.0118055	0.0683114	0.0227705
-65.0045	-0.0668888	0.0702567	0.0222471	0.0797084	-0.0116565	-0.00269072	-0.0798978	-0.0288185	0.130272			0.0125036	0.0659794	0.0219931
-64.9062	-0.0614558	0.0756778	0.0284889	0.0795121	-0.0154169	-0.00783926	-0.0740426	-0.0295894	0.122621			0.0131062	0.063931	0.0213103
-64.8079	-0.0558682	0.0806486	0.0351962	0.0791775	-0.0195348	-0.0127379	-0.0683941	-0.0308458	0.114988			0.0136256	0.0622342	0.0207447
-64.7096	-0.0501336	0.0851816	0.0424727	0.0788475	-0.0239106	-0.0173483	-0.0631141	-0.0326447	0.107367			0.0140798	0.0609695	0.0203232
-64.6113	-0.0443957	0.0892433	0.0499858	0.0784533	-0.0285949	-0.021676	-0.0582621	-0.0349737	0.0998253			0.0144006	0.0601782	0.0200594
-64.513	-0.0387594	0.0928774	0.0576076	0.0780034	-0.033599	-0.0257279	-0.0538439	-0.0377716	0.092392			0.0145754	0.059882	0.0199607
-64.4147	-0.0332216	0.096086	0.0650977	0.0772234	-0.0388159	-0.0295212	-0.0499248	-0.0410126	0.0850676			0.0145532	0.0600189	0.0200063
-64.3164	-0.0277529	0.0989243	0.0720713	0.0760546	-0.0441683	-0.0330976	-0.0464393	-0.0447636	0.0778568			0.0142984	0.0605192	0.0201731
-64.2181	-0.0224081	0.101394	0.0783955	0.0745665	-0.0496212	-0.0364877	-0.0433777	-0.0489369	0.0707024			0.013803	0.0613216	0.0204405
-64.1198	-0.0172953	0.103416	0.0835511	0.0726847	-0.055044	-0.0397025	-0.0407118	-0.0534338	0.063519			0.0129982	0.0622636	0.0207545
-64.0214	-0.0124164	0.105116	0.0873891	0.0705317	-0.0603813	-0.0428155	-0.0383745	-0.0582493	0.0563099			0.011901	0.0632945	0.0210982
-63.9231	-0.00772288	0.106529	0.0897457	0.0681064	-0.065621	-0.0459833	-0.0363131	-0.0633286	0.049051			0.0104959	0.0643472	0.0214491
-63.8248	-0.00324993	0.107429	0.0906287	0.0653355	-0.0707454	-0.0491534	-0.034484	-0.068562	0.041738			0.00877074	0.065315	0.0217717
-63.7265	0.000939584	0.107935	0.0899571	0.062096	-0.0757053	-0.0522174	-0.0327021	-0.0739547	0.0344436			0.00675458	0.0661407	0.0220469
-63.6282	0.00492298	0.10814	0.0877411	0.0583252	-0.0804931	-0.055122	-0.0309296	-0.0795737	0.0272586			0.00447437	0.066823	0.0222743
-63.5299	0.00874856	0.107971	0.0840975	0.0540673	-0.0851073	-0.0578849	-0.0291332	-0.0853442	0.0201687			0.00195374	0.0673537	0.0224512
-63.4316	0.0123578	0.107456	0.0793147	0.0494655	-0.0895448	-0.06045	-0.027175	-0.0912609	0.0130591			-0.000753083	0.0677758	0.0225919
-63.3333	0.0157003	0.106605	0.073539	0.0447371	-0.0938138	-0.062876	-0.0249244	-0.0972099	0.00609354			-0.0035721	0.0681243	0.0227081
-63.235	0.018887	0.105287	0.0668667	0.0400771	-0.0978628	-0.0652814	-0.022482	-0.103027	-0.000769451			-0.00647835	0.0683951	0.0227984
-63.1367	0.0219226	0.103397	0.0593035	0.035255	-0.101647	-0.0676021	-0.0199513	-0.108554	-0.00750002			-0.00948626	0.0685256	0.0228419
-63.0384	0.0246832	0.101054	0.0510265	0.0302562	-0.105157	-0.069847	-0.0173711	-0.113616	-0.0142601			-0.0125812	0.068529	0.022843
-62.9401	0.0271509	0.0981974	0.0423532	0.0252564	-0.10823	-0.0721208	-0.0147009	-0.118105	-0.0210052			-0.0156893	0.0684084	0.0228028
-62.8418	0.0292662	0.0946927	0.0333701	0.0202488	-0.110772	-0.0743742	-0.0118417	-0.122008	-0.0276632			-0.0187868	0.0681205	0.0227068
-62.7435	0.0310227	0.090595	0.02426	0.0153388	-0.112917	-0.0765896	-0.00889482	-0.125303	-0.0343789			-0.0218741	0.067713	0.022571
-62.6452	0.0323246	0.0859008	0.015175	0.0105255	-0.114713	-0.0788165	-0.00578554	-0.127923	-0.0410287			-0.0249267	0.0671854	0.0223951
-62.5469	0.0332292	0.0807011	0.00642461	0.00590509	-0.116018	-0.0810667	-0.00248886	-0.1299	-0.0476595			-0.0278747	0.0665695	0.0221898
-62.4486	0.0337418	0.0749943	-0.00200679	0.00144013	-0.116825	-0.0833039	0.000904407	-0.131328	-0.054279			-0.0307402	0.0658667	0.0219556
-62.3503	0.033802	0.0689264	-0.00999792	-0.00272386	-0.117186	-0.0855119	0.00442773	-0.132371	-0.0608065			-0.0334935	0.0651396	0.0217132
-62.252	0.0333714	0.0625498	-0.0174418	-0.00644968	-0.11707	-0.0877021	0.00802573	-0.133069	-0.0673028			-0.0361209	0.0644014	0.0214671
-62.1537	0.0324958	0.0558607	-0.0241062	-0.0098108	-0.116495	-0.0898387	0.0116808	-0.133552	-0.0737422			-0.0386119	0.0636731	0.0212244
-62.0554	0.0312108	0.0490083	-0.0298993	-0.0126747	-0.115565	-0.0918553	0.0154147	-0.134041	-0.0801052			-0.0409452	0.063031	0.0210103
-61.9571	0.0295368	0.0419519	-0.0347944	-0.0149524	-0.114326	-0.0937111	0.0190859	-0.134559	-0.0863468			-0.0431239	0.0624571	0.020819
-61.8588	0.0274392	0.0346043	-0.0388641	-0.0167579	-0.112773	-0.0952915	0.0225953	-0.135161	-0.0922976			-0.0451673	0.0618931	0.020631
-61.7605	0.0249034	0.027207	-0.0422421	-0.018066	-0.110887	-0.0966316	0.0258332	-0.135991	-0.0980128			-0.0470986	0.0613802	0.0204601
-61.6622	0.0219953	0.0196722	-0.0446244	-0.018789	-0.10872	-0.0977614	0.0286127	-0.137055	-0.103523			-0.0489103	0.0609027	0.0203009
-61.5638	0.0187003	0.0119939	-0.0461725	-0.0188065	-0.106252	-0.0986163	0.0308565	-0.13829	-0.108865			-0.0506058	0.0604366	0.0201455
-61.4655	0.0149964	0.00426297	-0.0469279	-0.0181403	-0.103388	-0.0991835	0.0325488	-0.139768	-0.114007			-0.0521786	0.0599904	0.0199968
-61.3672	0.0109746	-0.00350585	-0.0473415	-0.0169888	-0.100151	-0.0994751	0.0336352	-0.141489	-0.118929			-0.0536967	0.0595657	0.0198552
-61.2689	0.00668202	-0.0112689	-0.0475564	-0.015434	-0.0965509	-0.0994119	0.0340392	-0.143528	-0.12374			-0.0551964	0.0591859	0.0197286
-61.1706	0.0020341	-0.0190274	-0.0478695	-0.0135648	-0.0926505	-0.0988748	0.0338111	-0.145906	-0.128452			-0.0567221	0.0588566	0.0196189
-61.0723	-0.00290337	-0.02674	-0.0486641	-0.0110893	-0.0885437	-0.0979206	0.0330183	-0.148713	-0.13293			-0.0582761	0.0586459	0.0195486
-60.974	-0.00801683	-0.0345427	-0.0500998	-0.00803701	-0.0843283	-0.0966131	0.0316706	-0.152068	-0.137138			-0.0599082	0.0586052	0.0195351
-60.8757	-0.013262	-0.0423252	-0.0521781	-0.00451939	-0.0800772	-0.0949481	0.0296914	-0.155972	-0.141073			-0.0616292	0.0587505	0.0195835
-60.7774	-0.0186298	-0.0500294	-0.0547465	-0.000639312	-0.0758083	-0.0930136	0.0271017	-0.160447	-0.144713			-0.0634361	0.0591122	0.0197041
-60.6791	-0.0239891	-0.0575972	-0.0577201	0.00349815	-0.0713927	-0.0908256	0.0239943	-0.165562	-0.147972			-0.0652852	0.0597271	0.019909
-60.5808	-0.0291793	-0.0650395	-0.0611784	0.00786407	-0.0667906	-0.0883458	0.0203811	-0.171265	-0.150967			-0.0671689	0.0606312	0.0202104
-60.4825	-0.0341826	-0.0723028	-0.0650081	0.0124061	-0.0621577	-0.085553	0.0162378	-0.177386	-0.153723			-0.0690744	0.0618041	0.0206014
-60.3842	-0.0389136	-0.0793115	-0.0691435	0.0171461	-0.0574559	-0.0825192	0.0116886	-0.18381	-0.156165			-0.0709426	0.0632494	0.0210831
-60.2859	-0.0432904	-0.0863706	-0.073689	0.0220835	-0.0527295	-0.0792863	0.0067527	-0.190284	-0.158296			-0.07279	0.064931	0.0216437
-60.1876	-0.0473169	-0.0934509	-0.078437	0.0270412	-0.0481409	-0.0758737	0.00144635	-0.196588	-0.160059			-0.0745976	0.0667619	0.022254
-60.0893	-0.051054	-0.10046	-0.0834595	0.0319157	-0.0437214	-0.072377	-0.00421356	-0.202532	-0.161495			-0.0763775	0.0686771	0.0228924
-59.991	-0.0544591	-0.10753	-0.0885396	0.0365519	-0.0393817	-0.0688976	-0.010273	-0.207866	-0.162537			-0.0781035	0.0705786	0.0235262
-59.8927	-0.0575574	-0.114692	-0.0934516	0.0406412	-0.0351162	-0.0654316	-0.0165899	-0.212568	-0.163192			-0.079773	0.0724069	0.0241356
-59.7944	-0.060282	-0.121862	-0.0979359	0.0443092	-0.0309876	-0.0619857	-0.0230941	-0.216536	-0.163646			-0.0813355	0.0741645	0.0247215
-59.6961	-0.0626206	-0.129065	-0.101875	0.0474663	-0.0270121	-0.0585808	-0.0296708	-0.219588	-0.163841			-0.0827541	0.0757782	0.0252594
-59.5978	-0.0645124	-0.136259	-0.105404	0.0499319	-0.0231771	-0.0552873	-0.0361975	-0.221683	-0.163737			-0.084036	0.0771939	0.0257313
-59.4995	-0.0659573	-0.143366	-0.108364	0.0516797	-0.0194369	-0.0521917	-0.0425896	-0.222827	-0.163309			-0.0851512	0.0783853	0.0261284
-59.4012	-0.0669601	-0.150424	-0.110553	0.0527959	-0.0158868	-0.0493709	-0.04878	-0.222921	-0.162589			-0.0860765	0.0793278	0.0264426
-59.3029	-0.0676205	-0.157409	-0.111667	0.0533854	-0.0125641	-0.0468587	-0.0547532	-0.221904	-0.161577			-0.0867742	0.0800012	0.0266671
-59.2046	-0.0679179	-0.16417	-0.111698	0.0532413	-0.00943541	-0.0446401	-0.0604759	-0.219783	-0.160301			-0.0872422	0.0803567	0.0267856
-59.1062	-0.0678408	-0.170665	-0.11049	0.0523509	-0.00649356	-0.042736	-0.0659224	-0.216677	-0.158676			-0.0874611	0.0803974	0.0267991
-59.0079	-0.0674374	-0.176766	-0.107591	0.0505295	-0.00372096	-0.0411419	-0.0711741	-0.212573	-0.156815			-0.08741	0.0800757	0.0266919
-58.9096	-0.066778	-0.182303	-0.102875	0.0477669	-0.00112853	-0.0397454	-0.076218	-0.207404	-0.154667			-0.087039	0.0793758	0.0264586
-58.8113	-0.0658365	-0.187302	-0.0967261	0.0441099	0.0012725	-0.0385761	-0.0809961	-0.201218	-0.152325			-0.0863997	0.0783692	0.0261231
-58.713	-0.0645132	-0.191727	-0.0891887	0.0395712	0.00347737	-0.0375647	-0.0856041	-0.193952	-0.149934			-0.0854928	0.077107	0.0257023
-58.6147	-0.062897	-0.195538	-0.0805015	0.0341204	0.00543019	-0.0366781	-0.0901137	-0.185588	-0.147507			-0.0843637	0.0756288	0.0252096
-58.5164	-0.0610938	-0.19864	-0.0709162	0.0277934	0.00714292	-0.0359374	-0.0945303	-0.176308	-0.145045			-0.0830594	0.0740144	0.0246715
-58.4181	-0.0591137	-0.20126	-0.060701	0.0204847	0.00862548	-0.0353518	-0.0988342	-0.166285	-0.142437			-0.0816525	0.072366	0.024122
-58.3198	-0.0569773	-0.203348	-0.0499902	0.0121469	0.00979004	-0.0348524	-0.103138	-0.155733	-0.139831			-0.0802149	0.0707792	0.0235931
-58.2215	-0.0547853	-0.204584	-0.0388096	0.00269186	0.0107035	-0.0344058	-0.107502	-0.144863	-0.137248			-0.0787558	0.0693017	0.0231006
-58.1232	-0.0525414	-0.204967	-0.0273864	-0.00764232	0.0114666	-0.0339877	-0.111865	-0.133905	-0.134613			-0.0772712	0.0680641	0.022688
-58.0249	-0.0502105	-0.204639	-0.0158894	-0.0187098	0.0120648	-0.0334398	-0.11617	-0.123101	-0.131839			-0.0757705	0.0671856	0.0223952
-57.9266	-0.0477773	-0.203653	-0.00465219	-0.0304392	0.0123459	-0.0326606	-0.120388	-0.112559	-0.128965			-0.0743053	0.0666898	0.0222299
-57.8283	-0.0452229	-0.202035	0.00604875	-0.0425908	0.0122508	-0.0316908	-0.124632	-0.102323	-0.12593			-0.0729027	0.0665802	0.0221934
-57.73	-0.0425518	-0.199761	0.0159812	-0.0552868	0.0118249	-0.0305154	-0.128845	-0.0925533	-0.122689			-0.0715996	0.066816	0.022272
-57.6317	-0.0396748	-0.196843	0.0250494	-0.0684067	0.0111042	-0.0291367	-0.133049	-0.0833889	-0.119272			-0.070402	0.0673912	0.0224637
-57.5334	-0.0366502	-0.193319	0.0332144	-0.0817926	0.0100311	-0.0275061	-0.137315	-0.0748653	-0.115694			-0.0693218	0.0682816	0.0227605
-57.4351	-0.0334988	-0.189384	0.0405267	-0.0954782	0.00861959	-0.0255559	-0.141659	-0.0669965	-0.112149			-0.0683973	0.0695254	0.0231751
-57.3368	-0.0302156	-0.185013	0.0466982	-0.109568	0.0068506	-0.0232368	-0.146133	-0.0598322	-0.10855			-0.0676666	0.0710433	0.0236811
-57.2385	-0.0267884	-0.180327	0.0518429	-0.123995	0.00472633	-0.020506	-0.15074	-0.0534528	-0.104814			-0.0671171	0.07285	0.0242833
-57.1402	-0.0232675	-0.175529	0.0559935	-0.13854	0.00227227	-0.0174023	-0.155445	-0.0478585	-0.100864			-0.0667379	0.0749297	0.0249766
-57.0419	-0.0195956	-0.170687	0.0592784	-0.15324	-0.000496999	-0.0139987	-0.160313	-0.0429237	-0.0967146			-0.0665213	0.0773028	0.0257676
-56.9436	-0.0157819	-0.165962	0.0615708	-0.168168	-0.00359873	-0.0102725	-0.165189	-0.0386319	-0.0923264			-0.0664844	0.0799338	0.0266446
-56.8453	-0.0117998	-0.161364	0.0628341	-0.183298	-0.00697399	-0.00633595	-0.170025	-0.0350134	-0.0877302			-0.066634	0.0827868	0.0275956
-56.747	-0.00777651	-0.156995	0.0634838	-0.198679	-0.0105239	-0.0021946	-0.174778	-0.032035	-0.0828283			-0.0669251	0.0859265	0.0286422
-56.6486	-0.00380639	-0.152945	0.0632919	-0.214319	-0.0142514	0.0020824	-0.179301	-0.029778	-0.0775392			-0.0673963	0.0892689	0.0297563
-56.5503	2.6087e-05	-0.14929	0.0625085	-0.230098	-0.0181464	0.00640955	-0.183559	-0.028226	-0.0718998			-0.0680305	0.0928061	0.0309354
-56.452	0.00373046	-0.146112	0.0614101	-0.246153	-0.0222114	0.0108022	-0.187574	-0.0272125	-0.0659072			-0.0688031	0.0966086	0.0322029
-56.3537	0.00725552	-0.143172	0.0602956	-0.262375	-0.0263919	0.0151775	-0.191337	-0.0267008	-0.0595831			-0.069648	0.100648	0.0335492
-56.2554	0.0105227	-0.140627	0.0592901	-0.278603	-0.0306398	0.0194873	-0.194737	-0.0265352	-0.0529151			-0.0705286	0.10488	0.03496
-56.1571	0.0135647	-0.138588	0.0585486	-0.294663	-0.034917	0.0237512	-0.197754	-0.026634	-0.0459673			-0.0714066	0.109274	0.0364247
-56.0588	0.0163875	-0.137032	0.0583779	-0.310749	-0.0392197	0.0279066	-0.200453	-0.0269329	-0.03886			-0.0722861	0.113884	0.0379612
-55.9605	0.018959	-0.135825	0.0588167	-0.326773	-0.0434587	0.0319203	-0.202844	-0.0272829	-0.031635			-0.0731247	0.11866	0.0395533
-55.8622	0.0212126	-0.134912	0.0602059	-0.342766	-0.047506	0.0357374	-0.204887	-0.0276355	-0.0243123			-0.0738737	0.123611	0.0412035
-55.7639	0.02319	-0.134185	0.0625967	-0.358639	-0.0512804	0.0393935	-0.20652	-0.0279494	-0.0169373			-0.0744812	0.128693	0.0428976
-55.6656	0.0247804	-0.133675	0.06584	-0.374264	-0.0548371	0.0429229	-0.207822	-0.0281036	-0.00959482			-0.0749726	0.133843	0.0446142
-55.5673	0.025821	-0.133409	0.0699752	-0.389642	-0.0582007	0.0463139	-0.2088	-0.0280607	-0.00229594			-0.0753664	0.139038	0.0463459
-55.469	0.0262305	-0.133498	0.0748635	-0.404685	-0.0613163	0.0495861	-0.209372	-0.027884	0.00497698			-0.0756776	0.144221	0.0480738
-55.3707	0.0259914	-0.133725	0.0803652	-0.419353	-0.0643177	0.0526234	-0.209506	-0.0275275	0.0123383			-0.0759012	0.149344	0.0497814
-55.2724	0.0251304	-0.134036	0.0866511	-0.433571	-0.0670274	0.0553346	-0.209254	-0.027049	0.0196047			-0.076024	0.154391	0.0514638
-55.1741	0.0237043	-0.134339	0.0933206	-0.447378	-0.0692925	0.0577465	-0.208622	-0.0264602	0.0266253			-0.0760772	0.159319	0.0531064
-55.0758	0.0217354	-0.134541	0.100465	-0.460797	-0.071211	0.0599307	-0.207665	-0.0258128	0.0333302			-0.0760629	0.164146	0.0547154
-54.9775	0.0191697	-0.134502	0.10775	-0.473639	-0.0727501	0.0619873	-0.206326	-0.025182	0.0396099			-0.0759869	0.168768	0.0562561
-54.8792	0.015994	-0.134135	0.114866	-0.485615	-0.0738367	0.0638886	-0.204703	-0.0245047	0.045391			-0.0758505	0.173071	0.0576903
-54.7809	0.0121738	-0.133442	0.121886	-0.496651	-0.0745725	0.0656959	-0.202856	-0.0238489	0.050645			-0.0756633	0.177047	0.0590156
-54.6826	0.00784769	-0.132317	0.128469	-0.506667	-0.075066	0.067524	-0.20089	-0.0232079	0.0553078			-0.0754444	0.180649	0.0602164
-54.5843	0.00301865	-0.130694	0.134871	-0.515447	-0.0752551	0.0694328	-0.198915	-0.0225233	0.0593758			-0.0751262	0.183864	0.0612881
-54.486	-0.00214188	-0.128635	0.140827	-0.523016	-0.0752359	0.0715347	-0.196891	-0.0219011	0.0627327			-0.0747473	0.186668	0.0622226
-54.3877	-0.00760014	-0.126062	0.146205	-0.529219	-0.075023	0.0738424	-0.194821	-0.0214031	0.0653691			-0.0743013	0.188997	0.0629991
-54.2894	-0.0132642	-0.123119	0.15072	-0.533996	-0.074573	0.0764176	-0.192772	-0.0210104	0.0672374			-0.0738177	0.190813	0.0636042
-54.1911	-0.0190504	-0.11982	0.154247	-0.537426	-0.0738491	0.0793757	-0.190776	-0.0207949	0.0684244			-0.0732966	0.192137	0.0640457
-54.0927	-0.0248496	-0.116096	0.156722	-0.539671	-0.0729237	0.0826123	-0.188828	-0.0206832	0.0688658			-0.0727612	0.192995	0.0643317
-53.9944	-0.0306565	-0.112128	0.157879	-0.54054	-0.0717766	0.0862037	-0.186911	-0.0206395	0.0685944			-0.0722192	0.193313	0.0644378
-53.8961	-0.0364515	-0.108032	0.15773	-0.540233	-0.0704549	0.09011	-0.185117	-0.020724	0.0675494			-0.0717357	0.193149	0.0643831
-53.7978	-0.0422648	-0.103665	0.156161	-0.538769	-0.0689795	0.0942702	-0.183517	-0.0209828	0.0657936			-0.0713281	0.192497	0.0641655
-53.6995	-0.0481205	-0.0991617	0.153131	-0.536268	-0.067361	0.0986414	-0.182087	-0.0213614	0.0632969			-0.0710323	0.191386	0.0637952
-53.6012	-0.0539402	-0.0945626	0.149067	-0.532714	-0.0655281	0.103154	-0.180838	-0.0218905	0.0600803			-0.0707969	0.189875	0.0632917
-53.5029	-0.0596103	-0.0898598	0.143996	-0.528172	-0.0634796	0.107793	-0.179796	-0.0225309	0.0560901			-0.0706189	0.187994	0.0626646
-53.4046	-0.0649985	-0.0848922	0.138053	-0.522736	-0.0611486	0.112426	-0.179054	-0.0231411	0.0512412			-0.0704722	0.185786	0.0619285
-53.3063	-0.0700639	-0.0797912	0.131319	-0.516406	-0.0584515	0.117171	-0.178636	-0.0237341	0.0455791			-0.0703348	0.183294	0.0610979
-53.208	-0.0748267	-0.0746444	0.123714	-0.509205	-0.0555555	0.122129	-0.178425	-0.0242098	0.0391605			-0.070207	0.180543	0.060181
-53.1097	-0.0793063	-0.069471	0.115499	-0.501201	-0.0526456	0.127143	-0.178487	-0.0244876	0.0320603			-0.0700996	0.177593	0.0591978
-53.0114	-0.0834483	-0.0643239	0.106694	-0.492319	-0.0496455	0.132057	-0.178875	-0.0244392	0.0242426			-0.0700063	0.174432	0.0581441
-52.9131	-0.0872773	-0.059242	0.0975962	-0.482785	-0.0465249	0.1368	-0.179589	-0.0239973	0.0157404			-0.0699198	0.171169	0.0570562
-52.8148	-0.0906744	-0.0541426	0.0886181	-0.472882	-0.043268	0.141303	-0.180543	-0.0231961	0.00661743			-0.0697964	0.167927	0.0559758
-52.7165	-0.0935944	-0.0491514	0.0796845	-0.462669	-0.0397684	0.145535	-0.181765	-0.0219755	-0.0030629			-0.0696407	0.164733	0.054911
-52.6182	-0.0961526	-0.0443169	0.0710646	-0.452249	-0.0360405	0.149407	-0.183226	-0.0203039	-0.0133366			-0.0694615	0.16164	0.05388
-52.5199	-0.0983376	-0.0397318	0.0627714	-0.441846	-0.0321568	0.152842	-0.184949	-0.0182507	-0.0241965			-0.0693172	0.158707	0.0529025
-52.4216	-0.100238	-0.0352757	0.0548573	-0.43155	-0.0280258	0.155741	-0.186983	-0.0156864	-0.0354028			-0.0691736	0.155982	0.0519941
-52.3233	-0.101859	-0.0309647	0.0473573	-0.421462	-0.0237335	0.158041	-0.189265	-0.0125655	-0.0469874			-0.0690487	0.153487	0.0511624
-52.225	-0.103262	-0.0267475	0.0403441	-0.411655	-0.0194054	0.159704	-0.191738	-0.00882419	-0.0589252			-0.0689453	0.151247	0.0504155
-52.1267	-0.10447	-0.0224178	0.0340639	-0.402098	-0.0151048	0.160594	-0.194452	-0.00438365	-0.0713147			-0.0688425	0.149273	0.0497575
-52.0284	-0.105623	-0.0180951	0.0284584	-0.392727	-0.0108154	0.160806	-0.197388	0.000673999	-0.0840036			-0.0687459	0.147569	0.0491896
-51.9301	-0.106704	-0.0136677	0.0233386	-0.383689	-0.00655057	0.160299	-0.200558	0.00632628	-0.097004			-0.0686899	0.146166	0.0487222
-51.8318	-0.107737	-0.00911429	0.0187792	-0.37481	-0.00235978	0.159027	-0.203889	0.0126118	-0.110286			-0.068642	0.145032	0.048344
-51.7335	-0.108564	-0.00464196	0.0147736	-0.365985	0.00168543	0.15712	-0.207365	0.0195598	-0.123893			-0.0685899	0.144165	0.0480549
-51.6351	-0.10922	-0.000163663	0.0114042	-0.357258	0.00559421	0.154582	-0.211043	0.0270939	-0.13777			-0.0685313	0.143606	0.0478687
-51.5368	-0.109663	0.00433185	0.00834003	-0.348754	0.00931355	0.151391	-0.214792	0.0351785	-0.151792			-0.068494	0.143349	0.0477831
-51.4385	-0.109911	0.00879837	0.00545859	-0.340437	0.0127971	0.147677	-0.218573	0.043748	-0.165839			-0.0684757	0.14339	0.0477968
-51.3402	-0.109992	0.0130519	0.00262278	-0.332351	0.0159458	0.143573	-0.222331	0.052717	-0.179785			-0.0685053	0.143719	0.0479063
-51.2419	-0.109936	0.017163	-8.75551e-05	-0.324578	0.0188054	0.139024	-0.226051	0.0620161	-0.193665			-0.0685898	0.144346	0.0481154
-51.1436	-0.109713	0.0211833	-0.00268872	-0.317194	0.0214319	0.134029	-0.229739	0.0715569	-0.207415			-0.0687277	0.145273	0.0484244
-51.0453	-0.109341	0.0250977	-0.00524119	-0.310125	0.02395	0.128736	-0.2333	0.0813326	-0.220952			-0.0688714	0.146481	0.0488271
-50.947	-0.108869	0.0289375	-0.00786878	-0.303529	0.02634	0.12321	-0.236661	0.0912094	-0.234134			-0.0690405	0.14795	0.0493167
-50.8487	-0.108274	0.0326282	-0.0109198	-0.297324	0.0285486	0.117512	-0.239869	0.101081	-0.246958			-0.0692862	0.149618	0.0498728
-50.7504	-0.107737	0.0359377	-0.0145654	-0.291445	0.0305352	0.111738	-0.243014	0.110948	-0.259441			-0.0696717	0.151458	0.0504862
-50.6521	-0.10726	0.0388473	-0.0188684	-0.285888	0.032312	0.105886	-0.246033	0.120777	-0.271515			-0.0701936	0.153425	0.0511417
-50.5538	-0.106737	0.0414452	-0.0240688	-0.280622	0.0339162	0.100026	-0.248888	0.130478	-0.28308			-0.0708368	0.15547	0.0518232
-50.4555	-0.106089	0.0438905	-0.0303796	-0.275632	0.0354135	0.0942095	-0.251514	0.140125	-0.294085			-0.0715623	0.157585	0.0525283
-50.3572	-0.105318	0.0460539	-0.0376212	-0.270784	0.0368064	0.0884975	-0.253922	0.149533	-0.304584			-0.0723708	0.159725	0.0532417
-50.2589	-0.104455	0.0480021	-0.045973	-0.265995	0.038143	0.0830332	-0.256161	0.158627	-0.314494			-0.0732525	0.161873	0.0539576
-50.1606	-0.103452	0.0497009	-0.0554614	-0.261284	0.0394991	0.0778295	-0.258241	0.167237	-0.323732			-0.0742114	0.163988	0.0546626
-50.0623	-0.102314	0.0509754	-0.0663902	-0.256665	0.0408632	0.0729045	-0.260082	0.175335	-0.332144			-0.0752798	0.166011	0.0553371
-49.964	-0.100986	0.0518134	-0.0786608	-0.252167	0.042223	0.0682008	-0.261672	0.182928	-0.339751			-0.0764525	0.167946	0.0559821
-49.8657	-0.0994572	0.0521857	-0.091763	-0.247774	0.0436211	0.0637363	-0.262978	0.190004	-0.346514			-0.07766	0.169786	0.0565952
-49.7674	-0.0976507	0.0521309	-0.105708	-0.243662	0.0451648	0.0596181	-0.264001	0.196535	-0.352371			-0.0788828	0.171555	0.0571849
-49.6691	-0.0957161	0.0517921	-0.120571	-0.239923	0.0469154	0.0557521	-0.264647	0.202508	-0.357288			-0.0801308	0.173259	0.0577529
-49.5708	-0.0936421	0.0512946	-0.136266	-0.236475	0.0488134	0.0521714	-0.264956	0.207933	-0.361304			-0.0813812	0.174918	0.0583058
-49.4725	-0.0914736	0.0506329	-0.152537	-0.233344	0.0509386	0.0488411	-0.265108	0.212854	-0.364413			-0.0826232	0.176564	0.0588548
-49.3742	-0.089226	0.0498613	-0.169262	-0.230509	0.0532636	0.045552	-0.265096	0.217237	-0.366657			-0.0838707	0.178182	0.0593941
-49.2759	-0.0869426	0.0492209	-0.186082	-0.227883	0.0558029	0.0422646	-0.264983	0.221077	-0.368115			-0.0850712	0.179786	0.0599285
-49.1775	-0.0845574	0.0487182	-0.202987	-0.225303	0.0584352	0.038928	-0.264827	0.224402	-0.368742			-0.0862147	0.181347	0.0604492
-49.0792	-0.0821363	0.0482444	-0.219771	-0.222677	0.0611041	0.0355234	-0.26465	0.227272	-0.368546			-0.087293	0.182845	0.0609484
-48.9809	-0.0796814	0.0477864	-0.236414	-0.220116	0.0637536	0.0319889	-0.264508	0.229655	-0.367608			-0.0883493	0.184287	0.0614288
-48.8826	-0.0771963	0.0474167	-0.252754	-0.217576	0.0663666	0.0283945	-0.264332	0.2316	-0.365987			-0.0893408	0.185671	0.0618902
-48.7843	-0.0746237	0.0471107	-0.268445	-0.215043	0.0689033	0.0247283	-0.264026	0.233169	-0.363605			-0.0902035	0.186937	0.0623124
-48.686	-0.0718572	0.0469882	-0.283559	-0.212326	0.0713555	0.0209214	-0.26356	0.234274	-0.360507			-0.090919	0.188062	0.0626873
-48.5877	-0.0689001	0.047128	-0.297954	-0.209399	0.0736392	0.0169905	-0.262911	0.234962	-0.356743			-0.0914652	0.189034	0.0630115
-48.4894	-0.0658214	0.0474693	-0.311372	-0.206268	0.0757234	0.0128919	-0.262045	0.235322	-0.35227			-0.0918189	0.189809	0.0632696
-48.3911	-0.062736	0.0480699	-0.3237	-0.202912	0.077511	0.00868388	-0.26092	0.235302	-0.347133			-0.0919816	0.190347	0.0634489
-48.2928	-0.0596432	0.0489295	-0.335153	-0.199458	0.0789985	0.00432878	-0.259522	0.235049	-0.341431			-0.0919891	0.190712	0.0635706
-48.1945	-0.0565146	0.0498906	-0.345418	-0.195931	0.0802064	-0.000275278	-0.257822	0.234607	-0.335181			-0.0918263	0.190843	0.0636142
-48.0962	-0.0533635	0.0509415	-0.354277	-0.192202	0.0811457	-0.00505783	-0.255772	0.234093	-0.328492			-0.0914427	0.190723	0.0635742
-47.9979	-0.0502289	0.0520847	-0.361554	-0.188367	0.0819104	-0.00991356	-0.253337	0.233467	-0.321441			-0.0908199	0.190328	0.0634427
-47.8996	-0.0470424	0.0535024	-0.367225	-0.184313	0.082455	-0.0147951	-0.250531	0.232715	-0.314007			-0.0899157	0.189642	0.0632141
-47.8013	-0.043905	0.0551531	-0.37163	-0.179938	0.0826718	-0.0196299	-0.247478	0.231849	-0.306139			-0.0887829	0.188696	0.0628986
-47.703	-0.0409181	0.0570454	-0.374758	-0.175096	0.0825447	-0.0244719	-0.244217	0.230919	-0.297835			-0.0874207	0.187478	0.0624927
-47.6047	-0.0379982	0.0590591	-0.376613	-0.169746	0.0821105	-0.0292556	-0.240774	0.229855	-0.289066			-0.0858253	0.185966	0.0619888
-47.5064	-0.0351586	0.0610432	-0.377455	-0.16397	0.081428	-0.0339509	-0.236986	0.228778	-0.279797			-0.0840076	0.184203	0.061401
-47.4081	-0.0324357	0.0630752	-0.377328	-0.157577	0.0803618	-0.038467	-0.232685	0.227655	-0.270121			-0.081947	0.18217	0.0607232
-47.3098	-0.0298386	0.065075	-0.376246	-0.150465	0.0791055	-0.0425976	-0.227953	0.226531	-0.260079			-0.0796075	0.179902	0.0599672
-47.2115	-0.0272949	0.0669752	-0.374589	-0.142721	0.0777928	-0.0462628	-0.222725	0.225385	-0.249687			-0.0770141	0.177475	0.0591584
-47.1132	-0.0248502	0.0685944	-0.372579	-0.134493	0.0765005	-0.0493982	-0.216929	0.224237	-0.238887			-0.0742005	0.17492	0.0583068
-47.0149	-0.0224367	0.0700798	-0.370505	-0.125763	0.0752789	-0.0519075	-0.210526	0.223066	-0.22768			-0.0711548	0.17231	0.0574367
-46.9166	-0.0200705	0.0715071	-0.368235	-0.116525	0.0741293	-0.0537696	-0.203501	0.221932	-0.216086			-0.0678465	0.169643	0.0565476
-46.8183	-0.0177602	0.0727506	-0.365821	-0.106664	0.0730662	-0.0550234	-0.195953	0.220851	-0.204164			-0.064302	0.16694	0.0556466
-46.7199	-0.0155713	0.0739486	-0.363439	-0.0962209	0.0721576	-0.0556375	-0.187908	0.219827	-0.191999			-0.0605381	0.164274	0.0547579
-46.6216	-0.0135255	0.0751594	-0.360936	-0.0854876	0.0713533	-0.0555689	-0.179386	0.218949	-0.179476			-0.0565465	0.16164	0.0538799
-46.5233	-0.0116612	0.0763628	-0.358477	-0.0745479	0.0707256	-0.0547932	-0.170502	0.218168	-0.16675			-0.0523861	0.159098	0.0530327
-46.425	-0.0100138	0.0775731	-0.356189	-0.0633096	0.0703015	-0.0533519	-0.161297	0.217454	-0.153982			-0.0480907	0.156697	0.0522322
-46.3267	-0.00855604	0.0786012	-0.353895	-0.0517083	0.0701731	-0.0513241	-0.151872	0.216821	-0.141177			-0.0436596	0.154408	0.0514694
-46.2284	-0.00722445	0.0794992	-0.351537	-0.0396745	0.0703349	-0.0486572	-0.142219	0.216283	-0.128185			-0.0390423	0.152227	0.0507423
-46.1301	-0.00605973	0.0803171	-0.349284	-0.0272802	0.0707549	-0.04539	-0.132317	0.215797	-0.115032			-0.0342772	0.150197	0.0500657
-46.0318	-0.00509187	0.0810239	-0.347448	-0.0147832	0.0713687	-0.0415901	-0.122244	0.215344	-0.1017			-0.0294578	0.1484	0.0494665
-45.9335	-0.0042769	0.0816618	-0.346061	-0.00221135	0.0720862	-0.0373695	-0.112084	0.215054	-0.0882152			-0.0246016	0.146889	0.0489632
-45.8352	-0.00373561	0.0820806	-0.345261	0.0102461	0.0728963	-0.0328064	-0.101761	0.214909	-0.0746711			-0.0197893	0.145695	0.0485651
-45.7369	-0.00336887	0.0824422	-0.345135	0.0224735	0.073837	-0.0280479	-0.0910575	0.2149	-0.0611933			-0.0150167	0.144859	0.0482864
-45.6386	-0.00308481	0.0828181	-0.345554	0.0343197	0.0747584	-0.0231293	-0.0799461	0.215014	-0.0478208			-0.0102917	0.144351	0.0481169
-45.5403	-0.00295113	0.0832183	-0.346297	0.045701	0.0755766	-0.0181159	-0.0685208	0.215319	-0.0346251			-0.00563284	0.144128	0.0480425
-45.442	-0.0029354	0.0835506	-0.347161	0.0566863	0.076248	-0.0131056	-0.0568778	0.215654	-0.0217427			-0.00107588	0.144111	0.0480371
-45.3437	-0.00300054	0.0837276	-0.34822	0.0671114	0.0768874	-0.00812456	-0.0451143	0.216102	-0.00921565			0.00335041	0.144329	0.0481096
-45.2454	-0.00310016	0.0838324	-0.349294	0.0767112	0.0773358	-0.0033041	-0.0331131	0.216696	0.00301152			0.00764176	0.144706	0.0482352
-45.1471	-0.00335523	0.0837888	-0.350039	0.0854448	0.0773489	0.00120712	-0.0209122	0.217552	0.0149636			0.0117777	0.145138	0.0483794
-45.0488	-0.00377269	0.0837262	-0.350336	0.0933488	0.0770085	0.00539594	-0.00859574	0.218664	0.026462			0.0157668	0.145596	0.0485319
-44.9505	-0.00443829	0.0836089	-0.350001	0.100267	0.0762921	0.00911925	0.00375368	0.220047	0.0373996			0.019561	0.146005	0.0486684
-44.8522	-0.00531602	0.0834446	-0.349358	0.106326	0.0751011	0.0123366	0.0161069	0.221542	0.047815			0.0231108	0.146424	0.048808
-44.7539	-0.00640612	0.083238	-0.348611	0.111419	0.0735149	0.0149599	0.0284915	0.223116	0.0577622			0.0263871	0.146895	0.0489651
-44.6556	-0.00770259	0.0829153	-0.347516	0.115645	0.0714918	0.0168788	0.0407906	0.224738	0.0672503			0.0293879	0.147344	0.0491146
-44.5573	-0.00920049	0.0822451	-0.34621	0.119135	0.0690534	0.0181011	0.0530884	0.226329	0.0761584			0.0320778	0.147792	0.049264
-44.459	-0.0109358	0.081257	-0.344653	0.121989	0.0662066	0.0186364	0.065504	0.227903	0.0846146			0.0345024	0.148248	0.0494159
-44.3607	-0.0128688	0.0798977	-0.342873	0.124036	0.0629899	0.0185408	0.0780152	0.22946	0.0926829			0.0366535	0.148715	0.0495716
-44.2623	-0.0149853	0.0781182	-0.3412	0.125243	0.0593492	0.0178172	0.0907596	0.230969	0.100249			0.03848	0.149286	0.0497621
-44.164	-0.0173576	0.0759374	-0.33953	0.125608	0.0553217	0.0163736	0.103688	0.232421	0.107179			0.03996	0.149941	0.0499803
-44.0657	-0.0200009	0.0733432	-0.337877	0.125221	0.051018	0.014304	0.11675	0.23385	0.11346			0.0411186	0.150702	0.050234
-43.9674	-0.0229044	0.0704336	-0.336021	0.124337	0.0465064	0.0116367	0.130003	0.23524	0.119029			0.042029	0.151534	0.0505112
-43.8691	-0.0260716	0.0671605	-0.333963	0.123083	0.0418074	0.0083523	0.143373	0.236458	0.123905			0.0426782	0.152431	0.0508103
-43.7708	-0.0294409	0.0634804	-0.331567	0.121583	0.0370747	0.00459421	0.156689	0.237586	0.128053			0.0431168	0.153361	0.0511203
-43.6725	-0.0330309	0.0593735	-0.328554	0.11972	0.0323009	0.000498121	0.16974	0.238636	0.131608			0.0433657	0.154235	0.0514115
-43.5742	-0.0369415	0.0546404	-0.325216	0.117665	0.0276229	-0.00396404	0.182487	0.239597	0.134562			0.0433836	0.15514	0.0517133
-43.4759	-0.0411354	0.0493912	-0.321822	0.115545	0.0231126	-0.00866475	0.194982	0.240454	0.136879			0.0431935	0.156149	0.0520495
-43.3776	-0.0456228	0.0436919	-0.318314	0.113334	0.0188015	-0.0134981	0.207183	0.241288	0.138703			0.0428406	0.157254	0.0524181
-43.2793	-0.0503737	0.0374966	-0.314619	0.111113	0.0147133	-0.0184581	0.219066	0.242043	0.140114			0.0423438	0.15843	0.0528101
-43.181	-0.055487	0.0307466	-0.311047	0.109022	0.0108654	-0.023432	0.230547	0.242728	0.141106			0.041672	0.159749	0.0532497
-43.0827	-0.0609396	0.0234835	-0.308011	0.107103	0.00743481	-0.0283328	0.241663	0.243242	0.141635			0.0408088	0.161281	0.0537605
-42.9844	-0.0667783	0.0157983	-0.305491	0.105319	0.00429968	-0.0331693	0.25244	0.243561	0.141805			0.0397537	0.163019	0.0543398
-42.8861	-0.072986	0.00762292	-0.303665	0.103814	0.00154985	-0.0378731	0.262834	0.24364	0.141737			0.0385193	0.164988	0.054996
-42.7878	-0.0795841	-0.00109505	-0.302275	0.102546	-0.000604949	-0.0423977	0.272943	0.243587	0.141358			0.0371643	0.167134	0.0557112
-42.6895	-0.0865646	-0.0103275	-0.30111	0.101443	-0.00230466	-0.0466555	0.282799	0.243452	0.140598			0.0357033	0.169404	0.056468
-42.5912	-0.0939624	-0.0200266	-0.300513	0.10034	-0.00352939	-0.0505525	0.292413	0.243294	0.139438			0.0341002	0.171869	0.0572896
-42.4929	-0.101756	-0.0299294	-0.300528	0.0993108	-0.00423963	-0.0541103	0.301678	0.243165	0.137916			0.0323897	0.174513	0.0581711
-42.3946	-0.109854	-0.0401042	-0.30107	0.098235	-0.0045323	-0.0573992	0.310441	0.243102	0.136028			0.0305384	0.177284	0.0590948
-42.2963	-0.118204	-0.0504775	-0.302066	0.0971733	-0.00446512	-0.0603748	0.318709	0.243148	0.133828			0.0285857	0.180162	0.0600539
-42.198	-0.126827	-0.0609371	-0.303422	0.0960592	-0.00407029	-0.0629881	0.326388	0.243413	0.131462			0.0265642	0.183116	0.0610388
-42.0997	-0.135743	-0.0714967	-0.305173	0.094821	-0.00340799	-0.0651371	0.333451	0.243863	0.128843			0.0244467	0.186128	0.0620428
-42.0014	-0.144897	-0.082151	-0.30729	0.0933872	-0.00255861	-0.0669504	0.339793	0.24449	0.125928			0.0221946	0.189162	0.063054
-41.9031	-0.154251	-0.0929142	-0.309911	0.0916564	-0.00157035	-0.068411	0.345337	0.245251	0.122875			0.0197846	0.19222	0.0640733
-41.8048	-0.163794	-0.103701	-0.313119	0.0895699	-0.000407321	-0.0694176	0.350199	0.246152	0.119705			0.0172428	0.195321	0.0651069
-41.7064	-0.173529	-0.114473	-0.317104	0.0871357	0.000813409	-0.070116	0.354406	0.247147	0.116582			0.0145403	0.19851	0.0661699
-41.6081	-0.18345	-0.125371	-0.322041	0.0847271	0.00211785	-0.0705338	0.358025	0.24828	0.113364			0.0116799	0.201849	0.0672832
-41.5098	-0.193437	-0.136284	-0.327632	0.0822538	0.00345939	-0.0705216	0.361145	0.249535	0.110088			0.00873398	0.205267	0.0684223
-41.4115	-0.203389	-0.147298	-0.333725	0.0796137	0.0048115	-0.0702645	0.363698	0.250939	0.10684			0.0056917	0.208728	0.0695759
-41.3132	-0.213262	-0.15829	-0.340538	0.0767191	0.00615943	-0.0698094	0.365769	0.252465	0.10348			0.00252149	0.212257	0.0707522
-41.2149	-0.223096	-0.16908	-0.348085	0.0734751	0.00733789	-0.0691809	0.367371	0.254061	0.0999796			-0.000802021	0.215834	0.0719448
-41.1166	-0.23277	-0.179529	-0.356166	0.0698791	0.00835943	-0.0684999	0.368451	0.255713	0.0963201			-0.00424913	0.219386	0.0731286
-41.0183	-0.242182	-0.18969	-0.364405	0.0660678	0.00918351	-0.0677339	0.369009	0.257453	0.0924499			-0.007761	0.22284	0.0742799
-40.92	-0.251256	-0.199702	-0.372682	0.0620915	0.00985497	-0.066824	0.369057	0.259273	0.0883385			-0.0113165	0.226175	0.0753917
-40.8217	-0.259834	-0.209449	-0.380684	0.0579478	0.010311	-0.0657861	0.36862	0.26125	0.0839376			-0.0148542	0.229319	0.0764398
-40.7234	-0.26787	-0.218954	-0.388422	0.0534954	0.0103983	-0.0645517	0.367545	0.263423	0.0792908			-0.0184049	0.232241	0.0774137
-40.6251	-0.27536	-0.228224	-0.39597	0.048826	0.0102425	-0.0631064	0.365792	0.26575	0.0744324			-0.0219575	0.234947	0.0783157
-40.5268	-0.28221	-0.237319	-0.403167	0.0441092	0.0098813	-0.0615041	0.363399	0.268209	0.0693451			-0.0254729	0.237416	0.0791386
-40.4285	-0.288462	-0.24622	-0.409785	0.0391689	0.00930555	-0.059682	0.360357	0.270815	0.0640451			-0.0289397	0.239607	0.079869
-40.3302	-0.294112	-0.254893	-0.415854	0.0340732	0.00861789	-0.0575372	0.356751	0.273521	0.0585362			-0.0323219	0.241537	0.0805124
-40.2319	-0.299238	-0.263446	-0.421423	0.0288437	0.00786844	-0.0551526	0.352577	0.27629	0.0527569			-0.0356581	0.243234	0.0810782
-40.1336	-0.303786	-0.271834	-0.426419	0.0235543	0.00713784	-0.0525497	0.347837	0.279046	0.0466604			-0.038928	0.244671	0.081557
-40.0353	-0.307722	-0.280082	-0.430851	0.0182676	0.00648599	-0.0497515	0.34268	0.28177	0.040411			-0.0420879	0.245885	0.0819618
-39.937	-0.310976	-0.288168	-0.434583	0.0130949	0.00593645	-0.0466163	0.337285	0.284493	0.0341755			-0.0450398	0.246891	0.082297
-39.8387	-0.313605	-0.296138	-0.43742	0.00802852	0.00555084	-0.0431717	0.331695	0.287367	0.0278214			-0.0477636	0.247697	0.0825657
-39.7404	-0.31564	-0.30406	-0.439182	0.00315935	0.00529743	-0.0394511	0.325879	0.290473	0.021289			-0.0502483	0.248296	0.0827652
-39.6421	-0.317106	-0.311838	-0.439671	-0.00171507	0.00526581	-0.0354029	0.31995	0.293782	0.0144212			-0.0524792	0.248661	0.082887
-39.5438	-0.318005	-0.319333	-0.438832	-0.00694582	0.00550769	-0.031084	0.313908	0.297213	0.00729308			-0.0544754	0.248761	0.0829203
-39.4455	-0.318408	-0.32649	-0.436838	-0.0125395	0.00600571	-0.0265776	0.307706	0.30078	-0.000172455			-0.0562815	0.24863	0.0828765
-39.3471	-0.318475	-0.333251	-0.433615	-0.0184098	0.00681698	-0.0216982	0.301415	0.304434	-0.00797236			-0.0578616	0.248288	0.0827628
-39.2488	-0.318262	-0.33968	-0.429113	-0.024393	0.00788668	-0.0164318	0.294942	0.308162	-0.0158712			-0.0591956	0.247747	0.0825824
-39.1505	-0.317725	-0.34593	-0.423528	-0.0304057	0.00931506	-0.0107063	0.288367	0.312027	-0.023877			-0.0602737	0.247096	0.0823655
-39.0522	-0.316877	-0.352087	-0.417083	-0.0364556	0.0111375	-0.00448971	0.281732	0.315943	-0.0319289			-0.0611232	0.246395	0.0821318
-38.9539	-0.315748	-0.357989	-0.410062	-0.0427929	0.0133127	0.00217439	0.274994	0.319927	-0.0398338			-0.0617796	0.24568	0.0818933
-38.8556	-0.314354	-0.363519	-0.402733	-0.0492826	0.0158452	0.00921197	0.268189	0.323978	-0.0476019			-0.0622518	0.244994	0.0816647
-38.7573	-0.312831	-0.368798	-0.395476	-0.0559717	0.0187107	0.0166308	0.261374	0.328029	-0.0551531			-0.0626094	0.244431	0.0814769
-38.659	-0.311224	-0.37377	-0.388375	-0.062581	0.0219315	0.02434	0.254632	0.332013	-0.0624695			-0.0628336	0.244001	0.0813337
-38.5607	-0.309481	-0.37832	-0.381401	-0.0691467	0.0254353	0.0323357	0.247954	0.335906	-0.0695636			-0.0629201	0.243668	0.0812228
-38.4624	-0.307649	-0.382494	-0.37452	-0.0757765	0.0291679	0.0405877	0.241379	0.339689	-0.0763111			-0.0628807	0.243435	0.0811449
-38.3641	-0.305659	-0.38644	-0.367894	-0.0823319	0.0331123	0.0490243	0.235025	0.343324	-0.0826441			-0.0627203	0.243338	0.0811127
-38.2658	-0.303551	-0.39002	-0.361685	-0.0887511	0.0372167	0.0575432	0.22896	0.346853	-0.0885649			-0.0624443	0.243385	0.0811285
-38.1675	-0.301215	-0.393087	-0.355944	-0.094998	0.0414836	0.066101	0.223185	0.350228	-0.094047			-0.0620326	0.243526	0.0811752
-38.0692	-0.29864	-0.395671	-0.350601	-0.101111	0.0458727	0.0746612	0.217646	0.353484	-0.0990763			-0.0614928	0.243737	0.0812456
-37.9709	-0.295744	-0.39764	-0.345796	-0.107022	0.0502566	0.083204	0.212223	0.356706	-0.103636			-0.0608276	0.243989	0.0813298
-37.8726	-0.292591	-0.399033	-0.341646	-0.112881	0.0545921	0.0916323	0.206883	0.359842	-0.107806			-0.0601119	0.244283	0.0814275
-37.7743	-0.289104	-0.399779	-0.338354	-0.118741	0.0588057	0.0999394	0.201636	0.362838	-0.111527			-0.0593651	0.2446	0.0815333
-37.676	-0.285221	-0.399783	-0.336098	-0.12468	0.0628679	0.108105	0.196453	0.365603	-0.114744			-0.0586109	0.244911	0.081637
-37.5777	-0.280882	-0.399122	-0.334854	-0.130366	0.0666858	0.116153	0.19133	0.368216	-0.117315			-0.0577949	0.245208	0.0817361
-37.4794	-0.276088	-0.397873	-0.334625	-0.135641	0.0701652	0.124091	0.1863	0.370765	-0.119218			-0.0569027	0.245508	0.081836
-37.3811	-0.270813	-0.396065	-0.335443	-0.140406	0.0734065	0.131874	0.18141	0.373247	-0.120461			-0.0559167	0.245813	0.0819377
-37.2828	-0.264987	-0.393715	-0.337566	-0.1447	0.0763396	0.139289	0.176614	0.375696	-0.121053			-0.0548981	0.24613	0.0820432
-37.1845	-0.258577	-0.390869	-0.340833	-0.148665	0.0790781	0.14628	0.171952	0.378119	-0.121137			-0.0538503	0.246459	0.0821529
-37.0862	-0.251641	-0.387472	-0.345228	-0.152313	0.0816643	0.152827	0.167433	0.38048	-0.12068			-0.05277	0.246794	0.0822647
-36.9879	-0.244239	-0.383594	-0.35055	-0.1556	0.0840538	0.158994	0.16312	0.382914	-0.119792			-0.0516325	0.247168	0.0823892
-36.8896	-0.236427	-0.379411	-0.35663	-0.158309	0.0862756	0.164731	0.159092	0.385363	-0.118623			-0.0504377	0.247581	0.0825271
-36.7912	-0.228177	-0.375029	-0.363266	-0.160626	0.0882864	0.170118	0.155287	0.387898	-0.117077			-0.0491762	0.248044	0.0826812
-36.6929	-0.219512	-0.370371	-0.37016	-0.162603	0.0900671	0.175085	0.151756	0.390512	-0.115277			-0.0478336	0.248509	0.0828364
-36.5946	-0.210417	-0.365492	-0.377323	-0.164561	0.0916674	0.179574	0.148562	0.393202	-0.113159			-0.0464385	0.249006	0.0830021
-36.4963	-0.200927	-0.360452	-0.384825	-0.166406	0.0930932	0.183523	0.145686	0.396021	-0.110673			-0.0449954	0.249557	0.0831858
-36.398	-0.191043	-0.355114	-0.392611	-0.168138	0.0943562	0.186994	0.14316	0.398991	-0.107965			-0.0434855	0.250158	0.0833861
-36.2997	-0.18085	-0.349348	-0.400678	-0.169634	0.0954906	0.19003	0.140874	0.402156	-0.105092			-0.0418945	0.250804	0.0836012
-36.2014	-0.170332	-0.343335	-0.40897	-0.170948	0.0965323	0.192753	0.138758	0.405541	-0.102116			-0.0402352	0.251533	0.0838443
-36.1031	-0.159603	-0.337247	-0.417429	-0.172057	0.0974554	0.195274	0.136846	0.409162	-0.0990142			-0.0385126	0.252385	0.0841284
-36.0048	-0.148695	-0.33105	-0.426265	-0.17295	0.098283	0.197602	0.13519	0.412944	-0.0957519			-0.0367436	0.253386	0.0844621
-35.9065	-0.137714	-0.324779	-0.435451	-0.173713	0.0991055	0.199738	0.133829	0.416807	-0.0924671			-0.0349606	0.254547	0.0848489
-35.8082	-0.126779	-0.318431	-0.444996	-0.174187	0.0999663	0.201793	0.132722	0.420752	-0.0891853			-0.0331494	0.255877	0.0852925
-35.7099	-0.115973	-0.312132	-0.4549	-0.174169	0.100871	0.203795	0.131866	0.424665	-0.0858953			-0.0313191	0.257365	0.0857884
-35.6116	-0.105376	-0.305953	-0.465114	-0.173568	0.10185	0.205776	0.131377	0.428536	-0.0826388			-0.0294568	0.259017	0.086339
-35.5133	-0.0950301	-0.299874	-0.475919	-0.172615	0.102893	0.207692	0.13124	0.432292	-0.0794388			-0.02764	0.260876	0.0869588
-35.415	-0.0849329	-0.29384	-0.487291	-0.171242	0.104007	0.209639	0.131451	0.435834	-0.0763006			-0.0258528	0.262918	0.0876395
-35.3167	-0.0751153	-0.287876	-0.499264	-0.169632	0.105079	0.211639	0.13197	0.43918	-0.073135			-0.0241282	0.265161	0.0883869
-35.2184	-0.0655985	-0.281986	-0.511689	-0.167789	0.106076	0.213822	0.132878	0.44233	-0.0699967			-0.0224391	0.267592	0.0891974
-35.1201	-0.0564257	-0.276135	-0.524625	-0.165603	0.106939	0.216265	0.134213	0.445283	-0.0669194			-0.0207788	0.270222	0.090074
-35.0218	-0.0475918	-0.270253	-0.537714	-0.163105	0.107539	0.218921	0.135816	0.448044	-0.0639174			-0.01914	0.272949	0.090983
-34.9235	-0.039115	-0.264272	-0.551048	-0.160402	0.107881	0.221728	0.137676	0.450481	-0.0609526			-0.0175581	0.275758	0.0919194
-34.8252	-0.0309442	-0.258113	-0.564659	-0.157589	0.107983	0.224769	0.139759	0.452647	-0.057931			-0.0160089	0.278669	0.0928896
-34.7269	-0.0231043	-0.251678	-0.578744	-0.154706	0.107835	0.22799	0.142108	0.454448	-0.0549667			-0.0145353	0.281701	0.0939004
-34.6286	-0.0155758	-0.24506	-0.593469	-0.151664	0.107453	0.23153	0.144647	0.455903	-0.0519505			-0.0131319	0.284912	0.0949707
-34.5303	-0.00841262	-0.238259	-0.608755	-0.148187	0.106766	0.235473	0.147294	0.457054	-0.0489455			-0.0117747	0.288284	0.0960947
-34.432	-0.00160351	-0.231352	-0.62451	-0.144368	0.105724	0.239838	0.150062	0.457857	-0.0458955			-0.0104722	0.291805	0.0972684
-34.3336	0.00483656	-0.224424	-0.640955	-0.140171	0.104296	0.24458	0.152906	0.458314	-0.0426725			-0.00925437	0.29553	0.0985099
-34.2353	0.0109205	-0.217623	-0.657939	-0.135898	0.10251	0.249679	0.155857	0.458424	-0.0393079			-0.00815291	0.299457	0.0998189
-34.137	0.016512	-0.210908	-0.675139	-0.131596	0.100383	0.25495	0.15895	0.458069	-0.0357584			-0.00717079	0.303474	0.101158
-34.0387	0.0216453	-0.204167	-0.692334	-0.127331	0.0978862	0.260345	0.162166	0.457285	-0.0320703			-0.00628607	0.307523	0.102508
-33.9404	0.0262229	-0.197503	-0.709398	-0.123047	0.095043	0.265924	0.16552	0.456078	-0.0282194			-0.00548663	0.311584	0.103861
-33.8421	0.0302557	-0.191144	-0.726174	-0.118764	0.0918491	0.271703	0.169069	0.454517	-0.0240678			-0.00475059	0.315646	0.105215
-33.7438	0.0338641	-0.184915	-0.742666	-0.114633	0.0882202	0.277481	0.172826	0.452654	-0.0196618			-0.00409231	0.31969	0.106563
-33.6455	0.0370388	-0.178701	-0.758697	-0.110895	0.0842164	0.283174	0.176834	0.450613	-0.0150157			-0.00349252	0.323684	0.107895
-33.5472	0.0398148	-0.172536	-0.774129	-0.107758	0.079852	0.288752	0.181024	0.448468	-0.0101054			-0.00295742	0.327603	0.109201
-33.4489	0.0421902	-0.166434	-0.788683	-0.105139	0.0751999	0.294265	0.185335	0.446267	-0.00506104			-0.00245114	0.331374	0.110458
-33.3506	0.0441277	-0.16048	-0.802389	-0.103252	0.0703508	0.299553	0.189718	0.444117	-2.15953e-05			-0.00203065	0.335007	0.111669
-33.2523	0.0456522	-0.15467	-0.814934	-0.102035	0.0653263	0.304656	0.194116	0.441955	0.0049244			-0.0016676	0.338399	0.1128
-33.154	0.0467566	-0.149035	-0.826183	-0.101538	0.0601702	0.309594	0.198498	0.439741	0.00976832			-0.00135862	0.341501	0.113834
-33.0557	0.0474694	-0.143635	-0.836104	-0.101789	0.0549242	0.314323	0.202897	0.437482	0.0145422			-0.00109894	0.344301	0.114767
-32.9574	0.0477868	-0.138673	-0.844966	-0.10273	0.0497262	0.318815	0.207433	0.435183	0.0191638			-0.000918	0.346879	0.115626
-32.8591	0.0476866	-0.134188	-0.85261	-0.104311	0.0445315	0.323107	0.212067	0.432983	0.0235889			-0.000793812	0.349203	0.116401
-32.7608	0.0471171	-0.130269	-0.858895	-0.106559	0.0393219	0.327117	0.216783	0.430862	0.0277536			-0.000751974	0.35122	0.117073
-32.6625	0.0459899	-0.127011	-0.863637	-0.109333	0.0341481	0.330789	0.221582	0.42891	0.0317002			-0.000762253	0.35288	0.117627
-32.5642	0.0443823	-0.124317	-0.866717	-0.112655	0.0290161	0.333978	0.226423	0.427135	0.0352798			-0.00083052	0.354126	0.118042
-32.4659	0.0423757	-0.122138	-0.86801	-0.116707	0.0239916	0.336679	0.231327	0.425478	0.0384667			-0.000948467	0.354921	0.118307
-32.3676	0.0399153	-0.120495	-0.86767	-0.121468	0.0191901	0.338981	0.236301	0.423943	0.0411792			-0.0011247	0.355316	0.118439
-32.2693	0.0370135	-0.119495	-0.86532	-0.126982	0.0146233	0.340965	0.241394	0.422474	0.0433146			-0.00133465	0.355221	0.118407
-32.171	0.033717	-0.119058	-0.861105	-0.13299	0.0101895	0.342543	0.24658	0.42098	0.0448893			-0.00158369	0.354645	0.118215
-32.0727	0.0302287	-0.119043	-0.855356	-0.139492	0.00581356	0.343786	0.251824	0.4196	0.0458961			-0.00186031	0.353703	0.117901
-31.9744	0.0265314	-0.119433	-0.848326	-0.146544	0.0015391	0.344648	0.257147	0.418271	0.0464059			-0.00219556	0.352463	0.117488
-31.876	0.0227713	-0.120174	-0.839897	-0.154212	-0.00261413	0.345045	0.262499	0.41711	0.0463349			-0.00257065	0.350904	0.116968
-31.7777	0.01897	-0.120986	-0.830106	-0.162555	-0.00662364	0.344947	0.267806	0.416023	0.0455268			-0.00299963	0.349017	0.116339
-31.6794	0.0151375	-0.122064	-0.818932	-0.171413	-0.0104456	0.344532	0.273014	0.41497	0.0440161			-0.00346491	0.346817	0.115606
-31.5811	0.0113137	-0.123442	-0.806558	-0.180608	-0.0140924	0.343882	0.277979	0.413859	0.0416593			-0.00400083	0.344338	0.114779
-31.4828	0.00745826	-0.12508	-0.793093	-0.189977	-0.0175444	0.342979	0.282644	0.412622	0.0384434			-0.00461637	0.341591	0.113864
-31.3845	0.00353158	-0.126914	-0.778627	-0.199541	-0.0208483	0.341834	0.286971	0.411142	0.034509			-0.00532694	0.338593	0.112864
-31.2862	-0.000469359	-0.128895	-0.7631	-0.20924	-0.0241463	0.340472	0.290996	0.409283	0.0300131			-0.00612083	0.335323	0.111774
-31.1879	-0.00456285	-0.131035	-0.746755	-0.218999	-0.0273823	0.338767	0.29474	0.407052	0.0250551			-0.00701318	0.331839	0.110613
-31.0896	-0.00871065	-0.13334	-0.729645	-0.228761	-0.0305355	0.336642	0.298148	0.404446	0.0196379			-0.00801318	0.328144	0.109381
-30.9913	-0.0129095	-0.135675	-0.711751	-0.238601	-0.0336411	0.3341	0.301083	0.401458	0.0138243			-0.00912347	0.324227	0.108076
-30.893	-0.0170869	-0.137866	-0.692916	-0.248478	-0.0367137	0.331176	0.303508	0.398047	0.00783714			-0.0102769	0.320046	0.106682
-30.7947	-0.021097	-0.139843	-0.673321	-0.25839	-0.0396643	0.327795	0.305442	0.394101	0.0017134			-0.0114736	0.315626	0.105209
-30.6964	-0.024905	-0.141402	-0.653102	-0.268337	-0.042476	0.323928	0.306788	0.389601	-0.00445533			-0.0127067	0.310979	0.10366
-30.5981	-0.0284218	-0.142561	-0.632384	-0.278416	-0.0450981	0.319617	0.307404	0.384448	-0.0106237			-0.0140041	0.306121	0.10204
-30.4998	-0.0317329	-0.143274	-0.611139	-0.288663	-0.0474415	0.315016	0.307384	0.378639	-0.0167094			-0.0153244	0.301082	0.100361
-30.4015	-0.0348923	-0.143578	-0.589608	-0.299056	-0.0494724	0.310013	0.306698	0.372231	-0.0226072			-0.0166969	0.295913	0.0986377
-30.3032	-0.0378753	-0.143307	-0.567676	-0.309623	-0.0512887	0.304502	0.305361	0.365231	-0.0282861			-0.0181068	0.290581	0.0968602
-30.2049	-0.0406799	-0.142238	-0.545759	-0.320321	-0.052885	0.29844	0.303244	0.35766	-0.0336697			-0.0195787	0.285145	0.0950484
-30.1066	-0.0433022	-0.140485	-0.523883	-0.331277	-0.0541378	0.291912	0.300363	0.349595	-0.0386652			-0.0210977	0.279658	0.0932192
-30.0083	-0.045769	-0.138187	-0.502041	-0.342399	-0.0549898	0.284924	0.29672	0.340978	-0.0431372			-0.0226556	0.274111	0.0913702
-29.91	-0.0480343	-0.13534	-0.480306	-0.353523	-0.0555048	0.277538	0.292236	0.331839	-0.0471225			-0.0242465	0.268505	0.0895016
-29.8117	-0.0501692	-0.131953	-0.458836	-0.364612	-0.0557869	0.269777	0.286954	0.322063	-0.0506103			-0.0259082	0.262864	0.0876215
-29.7134	-0.0521825	-0.128158	-0.437571	-0.375523	-0.0558965	0.261649	0.280877	0.311747	-0.0534356			-0.0276104	0.257184	0.0857278
-29.6151	-0.0540522	-0.123899	-0.416476	-0.386312	-0.0557715	0.253085	0.274077	0.300883	-0.0555531			-0.0293354	0.251466	0.0838219
-29.5168	-0.055667	-0.119158	-0.395432	-0.397114	-0.0554283	0.244137	0.266719	0.289595	-0.0567556			-0.0310115	0.245766	0.081922
-29.4184	-0.057011	-0.113964	-0.374447	-0.407876	-0.0548406	0.234821	0.258833	0.277966	-0.0570062			-0.0326139	0.240115	0.0800383
-29.3201	-0.0580049	-0.108492	-0.353569	-0.418562	-0.0539634	0.225084	0.250502	0.266117	-0.0564322			-0.0341467	0.234562	0.0781874
-29.2218	-0.0585642	-0.102734	-0.332914	-0.429037	-0.0526608	0.215073	0.241755	0.254145	-0.0550779			-0.0355572	0.229155	0.076385
-29.1235	-0.0586445	-0.096673	-0.312573	-0.439288	-0.0510169	0.20499	0.232626	0.242136	-0.0529578			-0.0368223	0.223962	0.074654
-29.0252	-0.0582722	-0.090211	-0.292768	-0.449257	-0.0490993	0.194943	0.223204	0.23022	-0.0500386			-0.0379199	0.219058	0.0730192
-28.9269	-0.0574156	-0.0834565	-0.273457	-0.458812	-0.0469746	0.184871	0.213576	0.218499	-0.046423			-0.0388436	0.214441	0.0714803
-28.8286	-0.0561265	-0.0764692	-0.254865	-0.468124	-0.044656	0.17478	0.203703	0.207068	-0.0422964			-0.0396652	0.210195	0.0700649
-28.7303	-0.0545151	-0.0693171	-0.236949	-0.477022	-0.0421411	0.164798	0.193644	0.195922	-0.0375919			-0.0403525	0.206303	0.0687676
-28.632	-0.0525592	-0.062272	-0.219712	-0.485387	-0.039373	0.155056	0.183518	0.185093	-0.0324302			-0.0408964	0.202771	0.0675903
-28.5337	-0.0502554	-0.0552664	-0.203138	-0.493077	-0.0363526	0.145569	0.173524	0.174676	-0.0268611			-0.0412423	0.199588	0.0665292
-28.4354	-0.0475852	-0.0484326	-0.187309	-0.500039	-0.033218	0.136195	0.163601	0.164652	-0.0208264			-0.0414402	0.196706	0.0655687
-28.3371	-0.0445256	-0.0418956	-0.172207	-0.506165	-0.0300529	0.127134	0.153815	0.154964	-0.0144165			-0.0414833	0.194095	0.0646983
-28.2388	-0.041094	-0.0358591	-0.157878	-0.511376	-0.0267816	0.118435	0.144218	0.145682	-0.00765084			-0.0413673	0.191726	0.0639086
-28.1405	-0.0372952	-0.0305242	-0.144126	-0.515564	-0.023371	0.11006	0.134907	0.136842	-0.000553697			-0.0410694	0.189533	0.0631778
-28.0422	-0.0331892	-0.0258032	-0.130965	-0.518752	-0.0199345	0.102063	0.12591	0.12841	0.00669818			-0.040618	0.187491	0.062497
-27.9439	-0.0288444	-0.021685	-0.118091	-0.521096	-0.0164778	0.0945181	0.117249	0.120374	0.013948			-0.0400116	0.185597	0.0618657
-27.8456	-0.0242502	-0.0182456	-0.105375	-0.522629	-0.012911	0.0873847	0.109042	0.112757	0.0211076			-0.0392355	0.183837	0.061279
-27.7473	-0.0193817	-0.0153821	-0.0929699	-0.523368	-0.009212	0.0807068	0.1013	0.105604	0.0281236			-0.0382866	0.182203	0.0607342
-27.649	-0.014204	-0.0131519	-0.08094	-0.523336	-0.00529526	0.0744746	0.0940488	0.0988599	0.0348974			-0.0371829	0.18067	0.0602233
-27.5507	-0.00883637	-0.0115868	-0.0694338	-0.522665	-0.00120172	0.0687699	0.0872815	0.0924764	0.0413849			-0.035979	0.17925	0.05975
-27.4524	-0.00348101	-0.0107616	-0.0585196	-0.521258	0.00309143	0.0634932	0.0809343	0.0863362	0.0475713			-0.0347327	0.177862	0.0592873
-27.3541	0.00191819	-0.0106467	-0.0481867	-0.519321	0.00746937	0.0586325	0.0750338	0.0804262	0.0535109			-0.0334626	0.176544	0.0588481
-27.2558	0.00736096	-0.0110112	-0.0384692	-0.517005	0.0119024	0.0541777	0.0696014	0.0748384	0.0592574			-0.0321497	0.175335	0.0584449
-27.1575	0.012781	-0.0119109	-0.0291173	-0.514438	0.0163111	0.0500243	0.0646801	0.0696138	0.0648593			-0.0307996	0.17425	0.0580832
-27.0592	0.0181336	-0.013399	-0.0198862	-0.511697	0.0207809	0.0460778	0.0602575	0.0646915	0.07035			-0.0294101	0.173293	0.0577642
-26.9608	0.0234063	-0.0154988	-0.0107734	-0.508867	0.0253512	0.0423193	0.056274	0.0599946	0.0757532			-0.0280044	0.172475	0.0574917
-26.8625	0.0285369	-0.0181744	-0.00203983	-0.506087	0.0300397	0.0388418	0.0527592	0.0552906	0.0811286			-0.0266339	0.171828	0.0572758
-26.7642	0.0334657	-0.0214848	0.00636944	-0.503224	0.0348502	0.0356357	0.0497802	0.0505826	0.0866004			-0.0252694	0.171312	0.057104
-26.6659	0.0381797	-0.0253765	0.0146427	-0.50054	0.0397756	0.0326075	0.0472747	0.045955	0.0921463			-0.0239262	0.171006	0.057002
-26.5676	0.0426363	-0.0296416	0.0228703	-0.498138	0.044704	0.0297862	0.0453315	0.0414252	0.0978579			-0.0225743	0.170948	0.0569826
-26.4693	0.0468348	-0.0342488	0.0310964	-0.496186	0.0494959	0.0272592	0.0439487	0.0370022	0.103769			-0.0212254	0.171186	0.0570619
-26.371	0.0507676	-0.0391374	0.0392722	-0.494694	0.0542245	0.025077	0.0431613	0.0327724	0.109806			-0.0198612	0.171719	0.0572397
-26.2727	0.0544661	-0.0441653	0.0473738	-0.493725	0.0589536	0.0231502	0.0429613	0.0288393	0.115948			-0.0184664	0.172559	0.0575196
-26.1744	0.0579543	-0.0491652	0.0554359	-0.49334	0.0636416	0.0214704	0.0433511	0.025164	0.122142			-0.0170384	0.173706	0.0579019
-26.0761	0.0612239	-0.0539401	0.0632563	-0.493713	0.0682989	0.0200554	0.0443509	0.0217842	0.128469			-0.0155793	0.175195	0.0583983
-25.9778	0.0642714	-0.0583998	0.0709008	-0.494658	0.0729632	0.0188465	0.0460152	0.0188264	0.135041			-0.0140215	0.176972	0.0589906
-25.8795	0.0670247	-0.0625748	0.0779992	-0.496017	0.0775535	0.017765	0.0483818	0.0163656	0.141835			-0.0124075	0.178946	0.0596487
-25.7812	0.0694093	-0.066464	0.0843562	-0.49786	0.0820167	0.0168522	0.0514012	0.0143876	0.149002			-0.0107666	0.181118	0.0603727
-25.6829	0.0714002	-0.0702068	0.0904013	-0.500091	0.0863387	0.016109	0.0551486	0.0128459	0.156533			-0.00905792	0.183477	0.0611591
-25.5846	0.0729935	-0.0736208	0.0960862	-0.50272	0.0904046	0.0156036	0.0596792	0.0118111	0.164462			-0.00725559	0.18601	0.0620035
-25.4863	0.0742712	-0.0766416	0.101461	-0.505467	0.0942214	0.0152283	0.0649909	0.0113764	0.172829			-0.00530329	0.188639	0.0628796
-25.388	0.0753071	-0.0792258	0.106626	-0.508321	0.0977202	0.0150405	0.0711172	0.0115969	0.181439			-0.00318889	0.191341	0.0637804
-25.2897	0.0760974	-0.0814522	0.111583	-0.510981	0.101008	0.0151162	0.0780266	0.012378	0.190084			-0.00090446	0.194014	0.0646715
-25.1914	0.0765998	-0.0834692	0.116415	-0.51311	0.104069	0.0155088	0.0856864	0.0135152	0.198741			0.00155059	0.196565	0.0655217
-25.0931	0.0768347	-0.0851977	0.120925	-0.514645	0.106899	0.01625	0.0940036	0.0149347	0.207152			0.00412855	0.198929	0.0663096
-24.9948	0.0767787	-0.0866499	0.124823	-0.515439	0.109484	0.0173619	0.103	0.016644	0.215139			0.00679353	0.201027	0.0670089
-24.8965	0.0764079	-0.0879156	0.12835	-0.515424	0.111855	0.0187627	0.112721	0.0186403	0.222624			0.00955792	0.202857	0.067619
-24.7982	0.0757884	-0.0891429	0.131476	-0.5145	0.114113	0.0204309	0.123163	0.0211113	0.229548			0.0124431	0.204407	0.0681356
-24.6999	0.074983	-0.0902328	0.1342	-0.512611	0.116281	0.0223224	0.134332	0.0239485	0.235786			0.0154455	0.205651	0.0685503
-24.6016	0.0740522	-0.0912583	0.136146	-0.50959	0.118263	0.0244493	0.146212	0.0271671	0.241246			0.0185209	0.206517	0.0688388
-24.5033	0.0729614	-0.0923518	0.137127	-0.505371	0.12012	0.0266794	0.15864	0.0307386	0.245855			0.0215999	0.206976	0.0689922
-24.4049	0.0716759	-0.0935287	0.137213	-0.49993	0.121948	0.0288815	0.171522	0.0345998	0.249498			0.0246532	0.207028	0.0690093
-24.3066	0.0702587	-0.0947599	0.136329	-0.493273	0.123683	0.0310937	0.184828	0.0386676	0.252282			0.0276788	0.206691	0.0688971
-24.2083	0.0686468	-0.0960035	0.134666	-0.485381	0.125255	0.033244	0.198482	0.0428951	0.254263			0.0306742	0.205985	0.0686617
-24.11	0.0668159	-0.097388	0.132327	-0.476212	0.126673	0.0353212	0.212408	0.0472922	0.255498			0.0336373	0.204934	0.0683112
-24.0117	0.0647659	-0.0991031	0.129467	-0.465644	0.127888	0.037349	0.226531	0.0517463	0.255848			0.0365387	0.203521	0.0678405
-23.9134	0.062571	-0.10135	0.125997	-0.453928	0.128898	0.0393658	0.240756	0.056096	0.255229			0.0392926	0.201834	0.0672782
-23.8151	0.060349	-0.104062	0.122085	-0.441107	0.129756	0.0413837	0.255003	0.0602258	0.253732			0.0419295	0.19992	0.0666399
-23.7168	0.058107	-0.107211	0.118024	-0.427226	0.130465	0.0434034	0.269202	0.0642035	0.251274			0.0444714	0.19781	0.0659366
-23.6185	0.0558452	-0.110797	0.113549	-0.412504	0.13104	0.0453743	0.283202	0.0681242	0.247959			0.0468659	0.195573	0.0651909
-23.5202	0.0535072	-0.114994	0.108633	-0.396956	0.131553	0.0472217	0.296897	0.0719088	0.243783			0.0490615	0.193242	0.0644141
-23.4219	0.0510582	-0.119813	0.103369	-0.380856	0.13201	0.0489669	0.310258	0.0755625	0.238711			0.0510295	0.190916	0.0636386
-23.3236	0.048517	-0.125161	0.0976455	-0.364318	0.132435	0.050557	0.32321	0.0791118	0.232981			0.0527754	0.188654	0.0628847
-23.2253	0.045815	-0.130834	0.0914767	-0.347595	0.132741	0.0518835	0.335744	0.0826623	0.226766			0.0542956	0.186538	0.0621792
-23.127	0.0429415	-0.136757	0.0848783	-0.331065	0.132972	0.0529184	0.34784	0.0863318	0.220148			0.0555787	0.184676	0.0615587
-23.0287	0.0399129	-0.142897	0.0777091	-0.314717	0.13317	0.0536476	0.359504	0.0901411	0.213594			0.0566739	0.183119	0.0610397
-22.9304	0.0367647	-0.149186	0.0700883	-0.298707	0.1333	0.0540375	0.37067	0.0940948	0.207243			0.0575896	0.181899	0.0606331
-22.8321	0.0335659	-0.155547	0.0618014	-0.283204	0.133324	0.0541355	0.381245	0.0981622	0.201234			0.0583019	0.181027	0.0603425
-22.7338	0.030248	-0.161822	0.0531465	-0.268189	0.133168	0.0539437	0.391121	0.102277	0.195709			0.0588446	0.180453	0.0601509
-22.6355	0.026846	-0.167918	0.0441148	-0.253827	0.132739	0.0536161	0.400266	0.106523	0.190728			0.059232	0.180169	0.0600563
-22.5372	0.0233525	-0.173675	0.0349262	-0.240161	0.132158	0.0531414	0.408704	0.110863	0.186408			0.0595241	0.180149	0.0600498
-22.4389	0.0198971	-0.178986	0.0256758	-0.227218	0.131344	0.0526038	0.416505	0.115271	0.182703			0.0597551	0.180353	0.0601177
-22.3406	0.0164922	-0.183854	0.0162742	-0.214918	0.130263	0.0520352	0.423689	0.119755	0.179624			0.0599291	0.180739	0.0602464
-22.2423	0.0130469	-0.188332	0.0068751	-0.20313	0.129	0.0513543	0.430202	0.124229	0.177085			0.0600367	0.181246	0.0604155
-22.144	0.00957487	-0.192417	-0.00277543	-0.191838	0.127599	0.0506777	0.436048	0.128625	0.175011			0.0600562	0.18185	0.0606167
-22.0456	0.00612726	-0.195988	-0.0127305	-0.181049	0.126034	0.0499828	0.441173	0.132869	0.173387			0.0599783	0.182497	0.0608323
-21.9473	0.00278136	-0.198906	-0.0226487	-0.170829	0.124349	0.0492435	0.445547	0.137004	0.17229			0.0598701	0.183139	0.0610465
-21.849	-0.000486478	-0.201015	-0.0323453	-0.161012	0.122547	0.0484551	0.449187	0.14117	0.171775			0.0598083	0.183713	0.0612378
-21.7507	-0.00362169	-0.202323	-0.0417119	-0.151508	0.120624	0.0476628	0.452101	0.14537	0.171742			0.059815	0.184176	0.0613919
-21.6524	-0.00652081	-0.202717	-0.0509962	-0.142213	0.118639	0.0468172	0.454323	0.149533	0.172183			0.0598942	0.184499	0.0614997
-21.5541	-0.00912242	-0.20206	-0.0601696	-0.133024	0.116591	0.0459009	0.455866	0.153609	0.173093			0.060076	0.184637	0.0615455
-21.4558	-0.0113592	-0.200396	-0.0691145	-0.123878	0.114498	0.0449012	0.456718	0.157578	0.174492			0.0603821	0.184569	0.0615231
-21.3575	-0.0131664	-0.197828	-0.0779551	-0.114651	0.112357	0.0438632	0.456883	0.161438	0.176385			0.0608141	0.184304	0.0614345
-21.2592	-0.0145576	-0.194429	-0.0864879	-0.105275	0.1102	0.0428061	0.456373	0.165099	0.178676			0.0613783	0.18382	0.0612732
-21.1609	-0.0155081	-0.190359	-0.094702	-0.0956207	0.108079	0.0418146	0.455225	0.168491	0.181338			0.0620842	0.183131	0.0610435
-21.0626	-0.0159811	-0.185715	-0.102547	-0.0854869	0.105942	0.0409035	0.453415	0.1716	0.184272			0.0629336	0.182211	0.0607371
-20.9643	-0.0159769	-0.180722	-0.109808	-0.0749454	0.103742	0.0400434	0.45097	0.174341	0.187122			0.0638628	0.181057	0.0603522
-20.866	-0.0154383	-0.175386	-0.116426	-0.0640084	0.101456	0.0392073	0.447967	0.176692	0.189827			0.0648766	0.179669	0.0598897
-20.7677	-0.014348	-0.169698	-0.122098	-0.0524853	0.0991311	0.0383794	0.444445	0.178747	0.1923			0.0660416	0.178005	0.0593352
-20.6694	-0.0126361	-0.163651	-0.12702	-0.0404789	0.0968391	0.037584	0.440447	0.180611	0.194444			0.0673489	0.176101	0.0587003
-20.5711	-0.0103638	-0.157549	-0.130898	-0.0279051	0.0946201	0.0366206	0.43591	0.182286	0.196187			0.0687675	0.173945	0.0579815
-20.4728	-0.00750869	-0.151648	-0.133658	-0.0149209	0.0923374	0.035398	0.430816	0.183726	0.197467			0.0702231	0.171558	0.057186
-20.3745	-0.00414594	-0.145977	-0.135441	-0.00158252	0.0900691	0.0339142	0.425162	0.184928	0.198395			0.0717023	0.168979	0.0563265
-20.2762	-0.000291025	-0.140503	-0.136167	0.0120953	0.0878124	0.0321818	0.419028	0.185948	0.199157			0.0732514	0.166236	0.0554119
-20.1779	0.00414146	-0.135308	-0.135774	0.025855	0.0855641	0.0302391	0.412547	0.187004	0.199739			0.0748897	0.163384	0.0544614
-20.0796	0.00918142	-0.130442	-0.134094	0.0395525	0.0833387	0.028056	0.405808	0.188189	0.200241			0.0766479	0.160449	0.0534831
-19.9813	0.0147817	-0.125937	-0.131095	0.0531178	0.0811055	0.0256451	0.39897	0.189555	0.200598			0.0785267	0.15747	0.05249
-19.883	0.0208795	-0.121902	-0.12731	0.0665267	0.0788668	0.0229923	0.392147	0.191143	0.200747			0.0804545	0.154573	0.0515244
-19.7847	0.0274441	-0.118205	-0.122775	0.0796433	0.0766377	0.0200716	0.385327	0.192837	0.200748			0.0824143	0.15175	0.0505833
-19.6864	0.0343711	-0.11494	-0.1176	0.0922832	0.0743911	0.0169601	0.378544	0.194722	0.200682			0.0843793	0.149059	0.0496863
-19.5881	0.041564	-0.112264	-0.111466	0.104354	0.0720716	0.0137329	0.371836	0.19679	0.200553			0.0863523	0.146487	0.0488291
-19.4897	0.0489783	-0.110219	-0.104415	0.115857	0.0697254	0.0103857	0.365255	0.198925	0.200303			0.0883106	0.144051	0.048017
-19.3914	0.0565949	-0.108679	-0.0966304	0.126666	0.0672838	0.00696767	0.3589	0.201106	0.199873			0.0902313	0.141774	0.0472579
-19.2931	0.0643704	-0.107496	-0.0878203	0.136709	0.0647593	0.0034047	0.352791	0.203331	0.199171			0.0921355	0.139595	0.0465315
-19.1948	0.0723461	-0.106852	-0.0782463	0.145975	0.0620845	-0.000260403	0.346982	0.205609	0.198182			0.0939801	0.137596	0.0458655
-19.0965	0.0806233	-0.106711	-0.0681364	0.154317	0.0592555	-0.00402777	0.341426	0.207924	0.196851			0.0957245	0.135792	0.0452642
-18.9982	0.0891538	-0.106961	-0.0576032	0.161636	0.0562645	-0.00790604	0.33615	0.210219	0.195225			0.0973531	0.134191	0.0447303
-18.8999	0.0978438	-0.107355	-0.0468456	0.168009	0.053196	-0.011851	0.331133	0.212548	0.193428			0.0989008	0.13279	0.0442633
-18.8016	0.106587	-0.107849	-0.0357043	0.173474	0.0501369	-0.0157956	0.326283	0.214942	0.191452			0.100392	0.131543	0.0438476
-18.7033	0.115277	-0.10858	-0.0244678	0.177908	0.0470143	-0.0197401	0.321635	0.217203	0.189284			0.101726	0.13049	0.0434967
-18.605	0.123823	-0.109561	-0.0132362	0.181368	0.0437304	-0.0236758	0.317243	0.219189	0.18693			0.102868	0.129646	0.0432152
-18.5067	0.132214	-0.110509	-0.00230772	0.183777	0.0402268	-0.0274008	0.313185	0.220792	0.184442			0.103824	0.128961	0.042987
-18.4084	0.140417	-0.111235	0.00814964	0.185363	0.0366643	-0.0306774	0.309442	0.221986	0.181785			0.104655	0.128368	0.0427894
-18.3101	0.148386	-0.111765	0.0183871	0.186233	0.0330737	-0.0335728	0.305921	0.222846	0.178934			0.105382	0.127831	0.0426104
-18.2118	0.156185	-0.112341	0.0282989	0.186417	0.0294803	-0.0360047	0.302449	0.223252	0.175782			0.105946	0.127334	0.0424447
-18.1135	0.163734	-0.112734	0.0376656	0.186065	0.0258244	-0.0379031	0.298892	0.223086	0.172339			0.10633	0.126803	0.0422676
-18.0152	0.171001	-0.112905	0.0464737	0.185338	0.0220415	-0.0393353	0.295125	0.222352	0.168499			0.10651	0.126211	0.0420704
-17.9169	0.177984	-0.112868	0.0545451	0.184333	0.0182364	-0.0402363	0.29112	0.220998	0.164397			0.106501	0.125547	0.0418489
-17.8186	0.184609	-0.112545	0.0621336	0.183173	0.0144274	-0.0405187	0.286793	0.218977	0.160049			0.106344	0.124742	0.0415807
-17.7203	0.190872	-0.112145	0.069063	0.181996	0.0106312	-0.040197	0.282222	0.216364	0.155407			0.106024	0.123861	0.0412871
-17.622	0.196778	-0.111597	0.0753359	0.18083	0.00693971	-0.039428	0.277367	0.213082	0.1505			0.105534	0.122883	0.0409611
-17.5237	0.202313	-0.11101	0.0806591	0.179738	0.00330117	-0.0382882	0.272242	0.209152	0.145291			0.104822	0.121848	0.0406161
-17.4254	0.207436	-0.110534	0.085044	0.17876	-0.000274227	-0.0366611	0.266815	0.204765	0.139865			0.103913	0.120775	0.0402584
-17.3271	0.212089	-0.110156	0.0886503	0.177962	-0.00364842	-0.0344676	0.261021	0.200018	0.134262			0.102859	0.119626	0.0398752
-17.2288	0.216242	-0.10992	0.0911271	0.177373	-0.00691451	-0.0316249	0.254857	0.194833	0.128615			0.101621	0.118401	0.039467
-17.1305	0.219895	-0.109562	0.0924568	0.176963	-0.00993547	-0.0281756	0.248337	0.18935	0.122903			0.100248	0.117046	0.0390153
-17.0321	0.22291	-0.109103	0.0928941	0.176894	-0.0127304	-0.0241921	0.24159	0.183693	0.11714			0.0987885	0.115594	0.0385315
-16.9338	0.225302	-0.108701	0.0923316	0.177298	-0.0151972	-0.0196848	0.234732	0.177894	0.111309			0.0972536	0.114098	0.0380327
-16.8355	0.227162	-0.10853	0.0909165	0.17814	-0.0174147	-0.0146877	0.227805	0.172075	0.105401			0.0956518	0.112631	0.0375435
-16.7372	0.228516	-0.108644	0.0882877	0.179414	-0.0194737	-0.00925435	0.220945	0.16624	0.0994992			0.0939478	0.11125	0.0370833
-16.6389	0.229423	-0.108987	0.0845963	0.181138	-0.0213269	-0.00332825	0.214178	0.160557	0.0935661			0.0922018	0.10997	0.0366568
-16.5406	0.229908	-0.109602	0.0800232	0.183344	-0.0228701	0.00304729	0.207459	0.155114	0.087624			0.0904498	0.108816	0.036272
-16.4423	0.229996	-0.110553	0.0746318	0.186118	-0.0239914	0.00969144	0.200827	0.150054	0.0816704			0.0887161	0.107849	0.0359496
-16.344	0.229646	-0.111867	0.0684904	0.189332	-0.0247885	0.016426	0.194387	0.145478	0.0757823			0.0869874	0.107116	0.0357054
-16.2457	0.228927	-0.113482	0.0614477	0.192861	-0.0253043	0.0233428	0.188228	0.141379	0.0699289			0.0852586	0.10663	0.0355432
-16.1474	0.227753	-0.115166	0.0536048	0.196568	-0.0255288	0.0303106	0.182502	0.13784	0.0641173			0.0835557	0.106355	0.0354515
-16.0491	0.226142	-0.117055	0.0452499	0.200393	-0.0254228	0.037267	0.177351	0.134835	0.0583253			0.0818983	0.106328	0.0354428
-15.9508	0.224122	-0.119194	0.0363126	0.204182	-0.0249123	0.0442791	0.172878	0.1323	0.0527276			0.0802994	0.106545	0.0355149
-15.8525	0.221772	-0.121602	0.0269431	0.207817	-0.0240335	0.0513479	0.168964	0.130326	0.0472538			0.0787542	0.107002	0.0356672
-15.7542	0.219169	-0.124351	0.0170923	0.210987	-0.022911	0.0584024	0.16565	0.128916	0.0419054			0.0772067	0.107708	0.0359027
-15.6559	0.216361	-0.127506	0.00689707	0.213507	-0.0215834	0.0654157	0.162937	0.128013	0.0366485			0.0756324	0.108651	0.0362169
-15.5576	0.213348	-0.130917	-0.00385876	0.215472	-0.0200626	0.0724671	0.160921	0.127621	0.0314138			0.074045	0.109838	0.0366127
-15.4593	0.21016	-0.134361	-0.0150139	0.216887	-0.0182573	0.0796353	0.15957	0.127772	0.0263014			0.0725215	0.111209	0.0370696
-15.361	0.206857	-0.137783	-0.0264748	0.217668	-0.0162096	0.0867786	0.158912	0.128463	0.0212261			0.0710487	0.112755	0.0375849
-15.2627	0.203477	-0.141257	-0.0381848	0.217784	-0.014052	0.0937651	0.158962	0.129689	0.0161897			0.0695968	0.114499	0.0381663
-15.1644	0.200003	-0.144843	-0.0499382	0.217196	-0.0116658	0.100621	0.159726	0.131494	0.0112232			0.0682018	0.116416	0.0388054
-15.0661	0.19637	-0.148605	-0.0615732	0.216011	-0.00917628	0.107317	0.161134	0.133719	0.00643323			0.0668477	0.118494	0.0394979
-14.9678	0.192632	-0.152545	-0.0731331	0.214078	-0.00652884	0.113896	0.163039	0.136249	0.00196502			0.0655169	0.120686	0.0402288
-14.8695	0.188805	-0.156491	-0.0842325	0.211314	-0.00384099	0.120433	0.165273	0.139112	-0.00208934			0.0642537	0.122891	0.0409636
-14.7712	0.184897	-0.160399	-0.0947849	0.207734	-0.00100935	0.126894	0.167741	0.142251	-0.00571869			0.0630673	0.125061	0.0416872
-14.6729	0.180891	-0.164258	-0.104593	0.203368	0.00206564	0.133266	0.170386	0.145662	-0.00896615			0.0619801	0.127157	0.0423857
-14.5745	0.1768	-0.16793	-0.11379	0.198324	0.00537488	0.139457	0.173195	0.149262	-0.0116852			0.0610009	0.129159	0.0430531
-14.4762	0.172621	-0.171373	-0.12233	0.192522	0.00880201	0.145464	0.176198	0.153071	-0.0139204			0.0601171	0.131054	0.0436848
-14.3779	0.168393	-0.174645	-0.130143	0.185927	0.0123478	0.151431	0.179331	0.157069	-0.0156714			0.0593377	0.132847	0.0442823
-14.2796	0.164132	-0.177777	-0.137171	0.178582	0.0159965	0.157458	0.182542	0.161183	-0.0169555			0.0586655	0.134542	0.0448474
-14.1813	0.159794	-0.180654	-0.143484	0.170509	0.0197393	0.163444	0.185831	0.16541	-0.0177659			0.0580914	0.136126	0.0453753
-14.083	0.155425	-0.183296	-0.149131	0.1618	0.0235448	0.169425	0.189159	0.169794	-0.0181133			0.0576231	0.137634	0.045878
-13.9847	0.151106	-0.185764	-0.154337	0.152552	0.0274478	0.175376	0.19248	0.174375	-0.0178898			0.0572606	0.139128	0.0463761
-13.8864	0.146853	-0.188113	-0.158912	0.142886	0.0314159	0.181214	0.195792	0.17922	-0.0172719			0.0570094	0.140613	0.0468712
-13.7881	0.142613	-0.19034	-0.163042	0.132954	0.0354538	0.186866	0.199273	0.184301	-0.0162078			0.0568746	0.142139	0.0473795
-13.6898	0.138443	-0.19229	-0.166639	0.123081	0.0397072	0.192372	0.202916	0.189721	-0.0146816			0.0569588	0.143693	0.0478976
-13.5915	0.13435	-0.193784	-0.169669	0.113459	0.0441887	0.19774	0.206643	0.195475	-0.0126227			0.057309	0.145231	0.0484104
-13.4932	0.130389	-0.19506	-0.171823	0.104067	0.0488438	0.2029	0.210346	0.20166	-0.010021			0.0579225	0.146733	0.0489109
-13.3949	0.12658	-0.196204	-0.173146	0.0948788	0.0536213	0.207782	0.214034	0.208222	-0.00694828			0.0587577	0.148208	0.0494028
-13.2966	0.122963	-0.197055	-0.173734	0.0859872	0.0585179	0.212438	0.217794	0.214971	-0.00339961			0.0598312	0.149637	0.0498792
-13.1983	0.119575	-0.197422	-0.173814	0.0773337	0.0635878	0.216831	0.221684	0.221887	0.000611768			0.0611415	0.151018	0.0503393
-13.1	0.116521	-0.197314	-0.173361	0.0690441	0.0687718	0.220808	0.225746	0.228968	0.0049347			0.06268	0.152341	0.0507803
-13.0017	0.113841	-0.196894	-0.17233	0.0609857	0.0741649	0.224406	0.230074	0.236202	0.00946777			0.0644353	0.153641	0.0512137
-12.9034	0.111545	-0.196108	-0.170771	0.0532087	0.0796461	0.227568	0.234678	0.243669	0.014017			0.0663836	0.154923	0.0516409
-12.8051	0.109686	-0.195059	-0.168997	0.0456675	0.0852257	0.230145	0.239669	0.251275	0.0184377			0.0684499	0.156243	0.0520809
-12.7068	0.108232	-0.193686	-0.167129	0.0382917	0.0907559	0.232204	0.245139	0.258863	0.0226393			0.07059	0.157604	0.0525347
-12.6085	0.107236	-0.19206	-0.165255	0.0311599	0.0961328	0.233778	0.251037	0.266368	0.0266021			0.0727777	0.159014	0.0530048
-12.5102	0.1067	-0.190225	-0.163145	0.024119	0.10143	0.234951	0.257337	0.273777	0.0302354			0.0750199	0.16045	0.0534832
-12.4119	0.106702	-0.188114	-0.16085	0.0172302	0.106698	0.235665	0.264037	0.281005	0.0335185			0.0773212	0.161885	0.0539616
-12.3136	0.107251	-0.185781	-0.15843	0.0105636	0.111783	0.235778	0.271125	0.287958	0.0365389			0.079643	0.163297	0.0544323
-12.2153	0.108376	-0.183163	-0.155835	0.00415529	0.11679	0.235257	0.278499	0.294671	0.039304			0.082006	0.164653	0.0548842
-12.1169	0.110073	-0.180562	-0.152748	-0.00189109	0.121696	0.234151	0.286148	0.301046	0.0418226			0.0844151	0.165937	0.0553124
-12.0186	0.112348	-0.178079	-0.149253	-0.00756306	0.126543	0.232518	0.294008	0.30696	0.0441344			0.0868462	0.167159	0.0557196
-11.9203	0.115142	-0.175546	-0.145305	-0.0128981	0.131187	0.23038	0.301991	0.312445	0.0461172			0.0892792	0.168275	0.0560918
-11.822	0.118399	-0.172713	-0.141067	-0.0178708	0.135663	0.227814	0.309983	0.317343	0.0478242			0.0917085	0.169234	0.0564112
-11.7237	0.122063	-0.169475	-0.136343	-0.0225	0.139968	0.224832	0.317786	0.321616	0.0492223			0.09413	0.169955	0.0566515
-11.6254	0.126017	-0.166017	-0.131273	-0.0268219	0.143952	0.221373	0.325372	0.325099	0.0503555			0.0964506	0.170453	0.0568178
-11.5271	0.130207	-0.162495	-0.125892	-0.0308995	0.147604	0.217414	0.332802	0.327792	0.0511403			0.0986303	0.170778	0.056926
-11.4288	0.134602	-0.158766	-0.120407	-0.0347619	0.150957	0.213037	0.34006	0.329623	0.0516317			0.100664	0.170933	0.0569776
-11.3305	0.139183	-0.154788	-0.114755	-0.0383671	0.154014	0.208303	0.347079	0.330574	0.0519093			0.102573	0.17089	0.0569633
-11.2322	0.143794	-0.150799	-0.108947	-0.041671	0.156801	0.20323	0.353694	0.330734	0.0520521			0.104321	0.170672	0.0568906
-11.1339	0.148429	-0.147069	-0.102814	-0.0444789	0.159288	0.19795	0.359732	0.330064	0.052066			0.105907	0.170254	0.0567515
-11.0356	0.153006	-0.143549	-0.096595	-0.0468579	0.161407	0.192592	0.365065	0.328561	0.0520755			0.1073	0.169641	0.0565471
-10.9373	0.157496	-0.140022	-0.0904297	-0.0486562	0.163062	0.187171	0.369563	0.326384	0.0520194			0.10851	0.168793	0.0562642
-10.839	0.161795	-0.136467	-0.0842932	-0.0496954	0.164369	0.181756	0.373209	0.323446	0.052057			0.109575	0.167657	0.0558857
-10.7407	0.165772	-0.132801	-0.0780745	-0.0497232	0.165411	0.176487	0.375941	0.319808	0.052308			0.11057	0.166168	0.0553894
-10.6424	0.169405	-0.129001	-0.0717419	-0.048668	0.166264	0.171388	0.377676	0.315554	0.0528301			0.111523	0.164297	0.0547656
-10.5441	0.172677	-0.12501	-0.0651275	-0.046666	0.166942	0.166458	0.378414	0.310802	0.0536755			0.112463	0.162031	0.0540105
-10.4458	0.175549	-0.120931	-0.0584548	-0.04358	0.167314	0.161725	0.378071	0.305631	0.0547999			0.113347	0.159384	0.053128
-10.3475	0.177979	-0.11683	-0.0518095	-0.0394179	0.167409	0.157252	0.376575	0.299992	0.0563001			0.114161	0.156346	0.0521153
-10.2492	0.179868	-0.112572	-0.0453704	-0.0342048	0.16743	0.153169	0.373872	0.293887	0.0580548			0.114904	0.152913	0.050971
-10.1509	0.181195	-0.108217	-0.0393418	-0.0279029	0.167216	0.14941	0.370016	0.287294	0.0599882			0.115518	0.14911	0.0497033
-10.0526	0.181972	-0.103659	-0.0340397	-0.020607	0.166746	0.14594	0.364962	0.280265	0.0620981			0.115964	0.144959	0.0483196
-9.95426	0.182187	-0.098729	-0.0292911	-0.0123274	0.165997	0.142705	0.35873	0.27288	0.0642919			0.116271	0.140429	0.0468095
-9.85596	0.181826	-0.0935356	-0.0249651	-0.00323086	0.165071	0.139655	0.35138	0.265097	0.0665779			0.116431	0.135551	0.0451838
-9.75765	0.180866	-0.0884322	-0.0211437	0.00660136	0.163842	0.136841	0.343042	0.25702	0.0689271			0.116396	0.130447	0.0434825
-9.65935	0.179372	-0.0835003	-0.0179392	0.0170196	0.16224	0.134216	0.333736	0.248669	0.0712948			0.116123	0.125181	0.0417268
-9.56104	0.177361	-0.0786973	-0.0153206	0.0279142	0.160356	0.13177	0.32344	0.240156	0.0736007			0.11562	0.119785	0.0399282
-9.46274	0.174873	-0.0739635	-0.0133142	0.0392799	0.158222	0.129585	0.312106	0.231506	0.0758923			0.11491	0.114273	0.038091
-9.36444	0.171838	-0.0693945	-0.0115102	0.0511997	0.155811	0.12756	0.299813	0.222711	0.0781265			0.114017	0.108648	0.0362159
-9.26613	0.168247	-0.0650081	-0.0100204	0.0636649	0.153149	0.125651	0.286618	0.213793	0.0802026			0.112922	0.102987	0.0343291
-9.16783	0.164197	-0.0606807	-0.00861756	0.0765687	0.150201	0.12386	0.272629	0.20479	0.0820075			0.111662	0.0973294	0.0324431
-9.06952	0.159628	-0.0562858	-0.00733811	0.0897596	0.146952	0.122096	0.257959	0.195724	0.0835381			0.110226	0.0917385	0.0305795
-8.97122	0.154553	-0.051741	-0.0059741	0.103123	0.143586	0.120349	0.242712	0.18659	0.0847034			0.108656	0.0862681	0.028756
-8.87292	0.149045	-0.0471186	-0.00448323	0.116517	0.14015	0.11862	0.226971	0.17724	0.0855676			0.106946	0.0810071	0.0270024
-8.77461	0.143206	-0.0425272	-0.00289086	0.129671	0.136583	0.116932	0.210812	0.167704	0.0859479			0.105049	0.0760875	0.0253625
-8.67631	0.13715	-0.0380342	-0.0011897	0.142255	0.132844	0.115192	0.194249	0.158004	0.0857944			0.102918	0.071601	0.023867
-8.578	0.13089	-0.0337263	0.000649665	0.154199	0.128925	0.113345	0.177362	0.148221	0.0851196			0.100554	0.0676498	0.0225499
-8.4797	0.124413	-0.0295409	0.00248026	0.165574	0.124908	0.111427	0.16021	0.138286	0.0839689			0.0979696	0.0643332	0.0214444
-8.3814	0.117743	-0.0254874	0.00441452	0.176307	0.120816	0.109288	0.142937	0.128208	0.0824187			0.0951827	0.0617165	0.0205722
-8.28309	0.110797	-0.0216009	0.00653725	0.186432	0.116601	0.106987	0.125613	0.118092	0.0803533			0.0922013	0.059866	0.0199553
-8.18479	0.103624	-0.017955	0.00916429	0.195825	0.112178	0.104462	0.108405	0.108017	0.0778329			0.0890616	0.058763	0.0195877
-8.08649	0.0962468	-0.0146127	0.0122934	0.204232	0.10772	0.101796	0.0913717	0.0979767	0.0750044			0.0857809	0.0583603	0.0194534
-7.98818	0.0886709	-0.0115222	0.0161219	0.21165	0.103296	0.0990528	0.0746062	0.0880005	0.0718545			0.0824146	0.0585723	0.0195241
-7.88988	0.0808933	-0.00881008	0.0205893	0.217992	0.0988889	0.096202	0.0581492	0.0780922	0.0685256			0.078947	0.0593311	0.019777
-7.79157	0.072894	-0.00644842	0.0255321	0.223442	0.0945768	0.093359	0.0420289	0.0682764	0.0651697			0.0754256	0.0606154	0.0202051
-7.69327	0.0647528	-0.00433874	0.0312211	0.228024	0.0905282	0.0904408	0.0262321	0.0585804	0.0617875			0.0719142	0.0623154	0.0207718
-7.59497	0.05641	-0.00254054	0.0378702	0.231815	0.0868117	0.0875461	0.0109105	0.0490782	0.0584106			0.0684791	0.0643745	0.0214582
-7.49666	0.0479218	-0.00102238	0.0455832	0.234855	0.0834068	0.0847348	-0.00391321	0.0397936	0.0551292			0.0651654	0.06674	0.0222467
-7.39836	0.039217	0.000251553	0.0544558	0.23698	0.0803188	0.0819978	-0.0181993	0.0307377	0.0519062			0.0619628	0.0693249	0.0231083
-7.30005	0.0303509	0.00144453	0.0638398	0.2381	0.0775863	0.079408	-0.0318969	0.0219336	0.0487758			0.058838	0.0720616	0.0240205
-7.20175	0.021346	0.00248723	0.0736922	0.238052	0.0752075	0.076985	-0.0448987	0.0134178	0.0457851			0.055786	0.0748536	0.0249512
-7.10345	0.0122373	0.00342567	0.0837564	0.236787	0.0732014	0.0747223	-0.0572243	0.00517883	0.043051			0.0527929	0.0776443	0.0258814
-7.00514	0.00302455	0.0043059	0.0940684	0.234354	0.0716072	0.0726939	-0.068805	-0.0027709	0.0405324			0.04989	0.0804112	0.0268037
-6.90684	-0.00632404	0.00500544	0.104655	0.230787	0.0703203	0.0708294	-0.0796897	-0.0103934	0.0383468			0.0470597	0.0831596	0.0277199
-6.80853	-0.0158882	0.00537784	0.115522	0.226161	0.0693312	0.0691454	-0.0898331	-0.0175236	0.0365366			0.0443144	0.0858951	0.0286317
-6.71023	-0.0256333	0.00535278	0.126747	0.220484	0.0686685	0.0675839	-0.0991584	-0.0240843	0.0351926			0.0416836	0.0886064	0.0295355
-6.61193	-0.0355932	0.00500309	0.138242	0.21389	0.0683516	0.0661821	-0.107704	-0.0300111	0.0343276			0.0391876	0.0913247	0.0304416
-6.51362	-0.0456938	0.00442092	0.149949	0.206461	0.068396	0.0650014	-0.115525	-0.0353145	0.0339199			0.036846	0.0940724	0.0313575
-6.41532	-0.0559214	0.00360441	0.162014	0.198149	0.0686966	0.0639751	-0.122571	-0.0399396	0.0337838			0.0346435	0.0968519	0.032284
-6.31701	-0.0662552	0.00268431	0.17426	0.188905	0.0692893	0.0631911	-0.128875	-0.0438674	0.0338784			0.032579	0.09965	0.0332167
-6.21871	-0.0765329	0.00163796	0.1867	0.178588	0.0701402	0.0625538	-0.134361	-0.0470737	0.0342614			0.0306571	0.10243	0.0341433
-6.12041	-0.0867444	0.000551979	0.199144	0.167323	0.0712019	0.0620703	-0.139089	-0.0494649	0.0348791			0.0288747	0.105203	0.0350675
-6.0221	-0.0968898	-0.000433526	0.211791	0.155333	0.0724504	0.0617006	-0.143102	-0.0509574	0.0356281			0.02728	0.10805	0.0360168
-5.9238	-0.106963	-0.00123593	0.224548	0.142636	0.0738758	0.0613909	-0.146421	-0.0515611	0.0365065			0.025864	0.110979	0.0369928
-5.82549	-0.116933	-0.00178906	0.237341	0.12928	0.0755597	0.0612477	-0.148998	-0.0512519	0.0373427			0.0246443	0.113987	0.0379956
-5.72719	-0.126733	-0.00215909	0.250112	0.115239	0.0773771	0.0611727	-0.150864	-0.0500123	0.0379805			0.0235681	0.117064	0.0390214
-5.62889	-0.136391	-0.00225289	0.262667	0.10059	0.079258	0.0611517	-0.152087	-0.0477846	0.038508			0.0226288	0.120199	0.0400662
-5.53058	-0.145834	-0.00202667	0.274656	0.0853443	0.0812297	0.0611733	-0.152715	-0.0446896	0.0389089			0.021783	0.123331	0.0411102
-5.43228	-0.155061	-0.00141522	0.285886	0.0694983	0.0833896	0.0611806	-0.152634	-0.0407865	0.0391109			0.0210188	0.126411	0.042137
-5.33397	-0.164025	-0.000449367	0.296307	0.0533352	0.0856416	0.0611842	-0.151875	-0.0360375	0.0391637			0.0203606	0.12944	0.0431467
-5.23567	-0.172676	0.000646087	0.306347	0.0367653	0.0878996	0.061121	-0.150495	-0.0303652	0.0389473			0.019799	0.132514	0.0441713
-5.13737	-0.180983	0.00202864	0.316141	0.0198478	0.0902083	0.0609229	-0.148625	-0.0236939	0.0384716			0.0193688	0.135688	0.0452294
-5.03906	-0.18896	0.00362412	0.325805	0.00275503	0.0926105	0.0606049	-0.146282	-0.0159888	0.0376744			0.0190937	0.139011	0.0463371
-4.94076	-0.196567	0.00535348	0.33514	-0.0145654	0.0950794	0.0601846	-0.14354	-0.00723926	0.0366148			0.01894	0.14245	0.0474835
-4.84245	-0.203699	0.00720272	0.34375	-0.0319374	0.0976319	0.0597638	-0.140386	0.00250721	0.0351898			0.0188915	0.145897	0.0486323
-4.74415	-0.21028	0.00941844	0.351695	-0.0493712	0.100229	0.0592301	-0.136852	0.0131134	0.0333587			0.018949	0.149358	0.0497858
-4.64585	-0.21633	0.0121604	0.358974	-0.0667038	0.102826	0.0587126	-0.133043	0.0244576	0.0311625			0.019135	0.152844	0.0509481
-4.54754	-0.221836	0.0153767	0.365563	-0.0840678	0.105408	0.0582314	-0.128889	0.0364053	0.02856			0.0194168	0.156352	0.0521173
-4.44924	-0.22691	0.019024	0.371394	-0.101507	0.107946	0.0577106	-0.124331	0.0489243	0.0255502			0.0197556	0.159883	0.0532942
-4.35093	-0.231494	0.0229338	0.376066	-0.119033	0.110466	0.0572218	-0.11949	0.0619349	0.0222811			0.0200985	0.163354	0.0544514
-4.25263	-0.235605	0.0269976	0.379692	-0.136539	0.113019	0.0567804	-0.114444	0.0753377	0.0187781			0.0204462	0.166803	0.0556009
-4.15433	-0.239326	0.0312443	0.38225	-0.153989	0.115708	0.0564113	-0.109311	0.0890779	0.0151261			0.0207991	0.170252	0.0567505
-4.05602	-0.242628	0.0354936	0.383768	-0.171414	0.118609	0.0561022	-0.10411	0.102892	0.0113733			0.0211205	0.1737	0.0578999
-3.95772	-0.245522	0.039605	0.384181	-0.188723	0.121563	0.0557736	-0.0988309	0.116715	0.00751144			0.0213638	0.177102	0.0590342
-3.85941	-0.247987	0.043381	0.383564	-0.205908	0.12452	0.0554897	-0.0935242	0.130592	0.00366651			0.0215327	0.18047	0.0601567
-3.76111	-0.250032	0.046725	0.382021	-0.222813	0.127339	0.0551352	-0.0882726	0.144457	3.66168e-06			0.021618	0.183785	0.0612618
-3.66281	-0.251699	0.0497245	0.379663	-0.239438	0.13006	0.0547187	-0.0830307	0.15823	-0.0034001			0.0216475	0.187063	0.0623544
-3.5645	-0.252899	0.0523934	0.376599	-0.255862	0.132642	0.0543011	-0.0777051	0.171812	-0.00658886			0.0216326	0.1903	0.0634333
-3.4662	-0.253633	0.0546798	0.373092	-0.272096	0.134939	0.053836	-0.0723294	0.185206	-0.00961508			0.0215644	0.193534	0.0645115
-3.36789	-0.253918	0.0565273	0.369268	-0.288192	0.136847	0.0533721	-0.0670433	0.198389	-0.012491			0.0214176	0.196791	0.0655969
-3.26959	-0.253675	0.0578844	0.365028	-0.304297	0.138453	0.0528685	-0.0619038	0.211323	-0.015222			0.0211621	0.200055	0.0666851
-3.17129	-0.252954	0.0588941	0.360193	-0.320147	0.139769	0.052455	-0.0569984	0.223893	-0.0176767			0.0208253	0.20324	0.0677468
-3.07298	-0.251809	0.0594338	0.354683	-0.335417	0.140664	0.0522071	-0.0523408	0.235918	-0.019885			0.0203837	0.206239	0.0687462
-2.97468	-0.250293	0.0595832	0.348374	-0.350131	0.141088	0.0520964	-0.0479481	0.24737	-0.0218188			0.0198134	0.209021	0.0696736
-2.87637	-0.248369	0.0593231	0.341511	-0.364083	0.141109	0.0520594	-0.0437843	0.258228	-0.023546			0.019161	0.211572	0.0705239
-2.77807	-0.246097	0.0587448	0.334538	-0.377305	0.14063	0.0519898	-0.0398586	0.268511	-0.0250013			0.0184613	0.213961	0.0713203
-2.67977	-0.243491	0.0577299	0.327388	-0.389741	0.139704	0.0519799	-0.0362714	0.278298	-0.0261402			0.0177175	0.216165	0.0720549
-2.58146	-0.240551	0.0562816	0.320117	-0.401286	0.138403	0.0518515	-0.0330095	0.287613	-0.0270833			0.0169262	0.218161	0.0727203
-2.48316	-0.237289	0.0544097	0.312831	-0.411567	0.136707	0.0515317	-0.0301139	0.296534	-0.0277661			0.0161419	0.219881	0.0732935
-2.38485	-0.233596	0.0520617	0.305499	-0.420419	0.134695	0.0510808	-0.0276358	0.30505	-0.0280735			0.015407	0.221254	0.0737515
-2.28655	-0.229548	0.0493416	0.298743	-0.427753	0.13245	0.0504363	-0.0255171	0.313182	-0.0281708			0.014796	0.222359	0.0741196
-2.18825	-0.225123	0.0462276	0.292673	-0.433484	0.129875	0.0495453	-0.0236967	0.321015	-0.0281372			0.0143216	0.223175	0.0743916
-2.08994	-0.22039	0.0427127	0.287296	-0.437501	0.126954	0.0484212	-0.0221854	0.328522	-0.028147			0.0139648	0.223671	0.0745571
-1.99164	-0.215353	0.0389259	0.282594	-0.439767	0.123611	0.0470927	-0.0209827	0.335924	-0.0282284			0.0137574	0.223861	0.0746202
-1.89333	-0.210016	0.034988	0.278447	-0.44038	0.119946	0.0456954	-0.0200207	0.3432	-0.0283947			0.0137183	0.223749	0.074583
-1.79503	-0.204393	0.0309945	0.274839	-0.439329	0.116025	0.0441496	-0.0192685	0.350195	-0.0287948			0.0138241	0.223311	0.0744371
-1.69673	-0.198512	0.0270045	0.271713	-0.436645	0.111958	0.0425405	-0.018741	0.356862	-0.0296423			0.0140598	0.222553	0.0741843
-1.59842	-0.192337	0.0229853	0.269052	-0.43239	0.107756	0.0409135	-0.018416	0.363163	-0.0310676			0.0144066	0.22148	0.0738267
-1.50012	-0.186007	0.018838	0.266781	-0.426512	0.103457	0.0392318	-0.018374	0.369071	-0.0330587			0.0148252	0.220087	0.0733625
-1.40181	-0.179524	0.0145856	0.264851	-0.418987	0.099207	0.0375118	-0.0186299	0.374618	-0.0354467			0.0153539	0.21838	0.0727933
-1.30351	-0.172878	0.0101077	0.263425	-0.409644	0.0950685	0.0357425	-0.0191283	0.379715	-0.0381914			0.0160242	0.216334	0.0721113
-1.20521	-0.166185	0.00550939	0.262543	-0.398414	0.0910617	0.0339125	-0.0197779	0.384293	-0.0412726			0.0168523	0.21395	0.0713167
-1.1069	-0.1594	0.000720167	0.262234	-0.385534	0.0872518	0.0319501	-0.0204473	0.388282	-0.0447886			0.0178075	0.211287	0.0704289
-1.0086	-0.152484	-0.00423844	0.262444	-0.371309	0.0836908	0.0298637	-0.0210412	0.391697	-0.0487624			0.0188733	0.208421	0.0694737
-0.910295	-0.145387	-0.00960119	0.263181	-0.355851	0.0803708	0.0276544	-0.0215629	0.394466	-0.0531841			0.0200096	0.205383	0.0684611
-0.811991	-0.138191	-0.0154256	0.264464	-0.339359	0.0772329	0.0252614	-0.0219942	0.396533	-0.0580419			0.0211645	0.202238	0.0674128
-0.713687	-0.130909	-0.0217309	0.266195	-0.322004	0.0744005	0.0227397	-0.0222694	0.397893	-0.0633371			0.0223309	0.199038	0.0663461
-0.615383	-0.123596	-0.0285456	0.268268	-0.303915	0.0719049	0.0200909	-0.0222602	0.398427	-0.0689823			0.023488	0.195797	0.0652658
-0.517079	-0.116295	-0.0358977	0.27062	-0.285293	0.0696732	0.0174158	-0.022031	0.39816	-0.0748068			0.0246161	0.192572	0.0641908
-0.418775	-0.109032	-0.0438578	0.273209	-0.266449	0.0676923	0.0147552	-0.0215729	0.397027	-0.0808067			0.0256627	0.189428	0.0631428
-0.320471	-0.101859	-0.052332	0.276397	-0.247616	0.0659317	0.0120396	-0.0208144	0.39498	-0.0871195			0.0266229	0.186478	0.0621595
-0.222167	-0.0947512	-0.061293	0.279824	-0.22889	0.0643067	0.00930949	-0.0197965	0.391963	-0.0934341			0.0274709	0.183671	0.0612235
-0.123863	-0.0877227	-0.0706962	0.2832	-0.21039	0.062883	0.00661173	-0.0184757	0.387838	-0.0995939			0.0281837	0.18095	0.0603167
-0.0255591	-0.080716	-0.0804871	0.286561	-0.192133	0.0616359	0.00395812	-0.0167726	0.382626	-0.105434			0.0288043	0.178317	0.0594391
0.0727449	-0.0737345	-0.0907535	0.289942	-0.174171	0.0605695	0.00136858	-0.014692	0.376225	-0.110883			0.0293189	0.175773	0.058591
0.171049	-0.0667688	-0.101511	0.293522	-0.156559	0.0596889	-0.0011867	-0.0123365	0.368621	-0.115842			0.0297365	0.173361	0.0577871
0.269353	-0.0598233	-0.1128	0.297132	-0.139273	0.0589842	-0.00364807	-0.00975812	0.359939	-0.120183			0.0300632	0.171088	0.0570294
0.367657	-0.0528957	-0.124573	0.300661	-0.122429	0.0583994	-0.00613916	-0.00690796	0.350307	-0.123677			0.0303051	0.168965	0.0563218
0.465961	-0.046041	-0.136851	0.304279	-0.105843	0.0579096	-0.00868551	-0.00387505	0.339886	-0.126171			0.0305119	0.167047	0.0556824
0.564265	-0.0391769	-0.149635	0.307965	-0.0895932	0.0575844	-0.0112547	-0.000654082	0.328735	-0.127583			0.0307098	0.16536	0.0551199
0.662569	-0.0323777	-0.162768	0.31159	-0.0736302	0.0573805	-0.013808	0.00284411	0.31688	-0.128069			0.0308934	0.1639	0.0546332
0.760873	-0.0256416	-0.176025	0.314751	-0.0581388	0.0571735	-0.0163442	0.00663093	0.304547	-0.127624			0.0310366	0.16263	0.0542101
0.859177	-0.0189073	-0.189307	0.317399	-0.0431434	0.0569372	-0.0188053	0.0106772	0.291762	-0.12628			0.0311481	0.161537	0.0538456
0.957481	-0.0122395	-0.202479	0.319728	-0.0284879	0.056684	-0.0211661	0.0149521	0.278759	-0.123992			0.0313065	0.160668	0.0535562
1.05578	-0.00565623	-0.215579	0.32178	-0.0142281	0.0564453	-0.0234286	0.0194069	0.265616	-0.120689			0.0315186	0.160048	0.0533495
1.15409	0.000787413	-0.228168	0.323635	-0.000342519	0.0562995	-0.0255496	0.0241362	0.252391	-0.116456			0.0318592	0.159629	0.0532098
1.25239	0.00714333	-0.239993	0.32502	0.0131461	0.0562598	-0.0274206	0.0290837	0.23919	-0.111235			0.032355	0.159299	0.0530996
1.3507	0.0133702	-0.25115	0.325787	0.0263548	0.0562896	-0.0290257	0.0341582	0.225959	-0.105158			0.0329539	0.159027	0.053009
1.449	0.0194358	-0.261567	0.326102	0.0393548	0.0564159	-0.0303766	0.0392752	0.212795	-0.09843			0.0336672	0.158851	0.0529504
1.5473	0.0253334	-0.271258	0.325958	0.0521428	0.0567282	-0.0315337	0.0445644	0.199766	-0.0910777			0.0345137	0.158769	0.0529231
1.64561	0.0310699	-0.280109	0.325185	0.0647893	0.0572042	-0.0324221	0.0501077	0.186889	-0.0831247			0.0355099	0.158707	0.0529024
1.74391	0.0365802	-0.288169	0.323524	0.0773415	0.057816	-0.0330266	0.0559017	0.174264	-0.0745206			0.0366345	0.158615	0.0528718
1.84222	0.0418268	-0.295488	0.321121	0.0898669	0.0586393	-0.0333635	0.062008	0.16193	-0.0655376			0.0378892	0.158552	0.0528508
1.94052	0.0467507	-0.301995	0.318418	0.102163	0.0596476	-0.0333967	0.0683788	0.150004	-0.0563532			0.0392908	0.158586	0.052862
2.03882	0.0514183	-0.307666	0.315307	0.114053	0.0608096	-0.0331362	0.0749906	0.138493	-0.0470973			0.0407969	0.158663	0.0528878
2.13713	0.0557731	-0.312407	0.311768	0.125585	0.0621876	-0.0326535	0.0818494	0.127452	-0.0378379			0.042413	0.158745	0.0529149
2.23543	0.059791	-0.316398	0.307646	0.136632	0.0637816	-0.0320022	0.0890192	0.116953	-0.0287873			0.0440706	0.158829	0.052943
2.33374	0.0634459	-0.319564	0.303079	0.147036	0.0655818	-0.0312134	0.0965785	0.10694	-0.0200173			0.0457629	0.15889	0.0529634
2.43204	0.0667394	-0.322066	0.298149	0.156651	0.0676394	-0.0301421	0.104549	0.0973578	-0.0116328			0.0474717	0.158941	0.0529802
2.53034	0.069712	-0.323884	0.292557	0.165107	0.0699492	-0.0287687	0.112939	0.088111	-0.00371308			0.0491122	0.15887	0.0529565
2.62865	0.0722607	-0.324876	0.286414	0.172449	0.0723361	-0.0272225	0.121722	0.079131	0.00357864			0.0506437	0.158647	0.0528823
2.72695	0.0744217	-0.325264	0.27999	0.178532	0.0747605	-0.0255	0.130768	0.0704404	0.0103395			0.0520542	0.158333	0.0527778
2.82526	0.076153	-0.325199	0.273578	0.183444	0.0773807	-0.0236041	0.140011	0.061907	0.0165806			0.0533614	0.158001	0.052667
2.92356	0.0774249	-0.324866	0.267311	0.187126	0.0801623	-0.0215944	0.149454	0.0535475	0.022335			0.0545444	0.1577	0.0525666
3.02186	0.0782323	-0.324439	0.261036	0.189362	0.0830669	-0.0195059	0.158954	0.0451652	0.0276573			0.0555032	0.157411	0.0524705
3.12017	0.0785963	-0.323918	0.25499	0.190255	0.0860646	-0.0173847	0.168459	0.0367215	0.0325121			0.0562552	0.157173	0.0523908
3.21847	0.0785407	-0.323645	0.249142	0.189764	0.0890557	-0.0153125	0.177866	0.0282311	0.0369628			0.0567337	0.157054	0.0523513
3.31678	0.0780673	-0.32372	0.243729	0.187936	0.092004	-0.0133168	0.187165	0.0197155	0.0411665			0.0569719	0.157112	0.0523706
3.41508	0.0772521	-0.324034	0.238989	0.184793	0.0948898	-0.0113998	0.196428	0.0113055	0.0453454			0.0570633	0.157348	0.0524494
3.51338	0.0761949	-0.324663	0.234894	0.18028	0.0975758	-0.00961062	0.205687	0.00306372	0.0495747			0.0569996	0.157775	0.0525915
3.61169	0.0748702	-0.325589	0.231399	0.174474	0.100018	-0.00789806	0.214766	-0.00509939	0.053679			0.0567354	0.158369	0.0527898
3.70999	0.0732819	-0.326856	0.228676	0.167275	0.102294	-0.00631119	0.223489	-0.0130681	0.0575702			0.0562613	0.159139	0.0530464
3.8083	0.0715839	-0.328424	0.226706	0.158662	0.104391	-0.0048116	0.231746	-0.0208626	0.0611734			0.0555738	0.160057	0.0533523
3.9066	0.0698098	-0.330282	0.2254	0.148622	0.106273	-0.00344003	0.23945	-0.0284032	0.0646181			0.054672	0.161099	0.0536997
4.0049	0.0680356	-0.332577	0.224507	0.137437	0.10797	-0.00227171	0.246567	-0.0355922	0.0679795			0.0535617	0.162294	0.0540981
4.10321	0.066192	-0.335339	0.22428	0.125383	0.109527	-0.00130453	0.25306	-0.0424438	0.0713426			0.0522997	0.163696	0.0545653
4.20151	0.0643443	-0.338574	0.224633	0.112447	0.110838	-0.000431552	0.258868	-0.0490012	0.0747314			0.0508727	0.165284	0.0550945
4.29982	0.0625784	-0.341998	0.225698	0.0988233	0.11191	0.000358689	0.263941	-0.0552998	0.0782905			0.049367	0.167008	0.0556695
4.39812	0.0609772	-0.345579	0.227567	0.0848365	0.112723	0.00107218	0.268185	-0.0612482	0.0819054			0.0478265	0.168863	0.0562876
4.49642	0.0595422	-0.349189	0.230235	0.0707693	0.11327	0.00165228	0.271565	-0.0667871	0.0855298			0.0462875	0.170805	0.0569349
4.59473	0.0582692	-0.352789	0.23382	0.056928	0.11358	0.00214794	0.274105	-0.0719439	0.0891377			0.044806	0.172839	0.057613
4.69303	0.0572554	-0.356558	0.238061	0.043302	0.113794	0.00274178	0.275837	-0.076608	0.092746			0.0433968	0.174968	0.0583226
4.79134	0.056552	-0.360241	0.242765	0.030001	0.113962	0.00340959	0.276838	-0.0807689	0.0961735			0.0420767	0.177101	0.0590337
4.88964	0.0561703	-0.363793	0.247942	0.0170096	0.113923	0.00422175	0.277121	-0.0843902	0.0993271			0.0408368	0.179207	0.0597357
4.98794	0.0561638	-0.367146	0.253309	0.00430443	0.113757	0.00522629	0.276715	-0.0874065	0.102048			0.0396634	0.181221	0.0604069
5.08625	0.0565856	-0.370168	0.258917	-0.00787215	0.113499	0.00636032	0.275795	-0.0897418	0.104236			0.0386234	0.183122	0.0610408
5.18455	0.0573757	-0.372795	0.26445	-0.0195225	0.113184	0.00763555	0.274437	-0.0913681	0.105874			0.0376966	0.184853	0.0616176
5.28286	0.0585747	-0.37476	0.270045	-0.0306006	0.112907	0.00918668	0.272699	-0.0923052	0.106918			0.0369627	0.186366	0.0621219
5.38116	0.0602333	-0.376241	0.275721	-0.0410184	0.112728	0.0110396	0.270619	-0.0926434	0.107003			0.0363823	0.187698	0.0625659
5.47946	0.06237	-0.377281	0.281233	-0.0508553	0.112673	0.0131988	0.268133	-0.0925036	0.105884			0.0358723	0.188815	0.0629384
5.57777	0.0649674	-0.377712	0.286537	-0.0600093	0.112753	0.0157445	0.265285	-0.0920072	0.103545			0.035456	0.189679	0.0632262
5.67607	0.0681321	-0.377569	0.291626	-0.0685573	0.112958	0.01862	0.262163	-0.091095	0.100161			0.0351597	0.190317	0.0634391
5.77438	0.0718548	-0.37698	0.296666	-0.0763424	0.113256	0.021799	0.258882	-0.0899213	0.0957828			0.0349996	0.190809	0.0636031
5.87268	0.0759934	-0.376055	0.301685	-0.0832745	0.113639	0.0252313	0.255572	-0.0885182	0.0904621			0.0349705	0.191201	0.0637336
5.97098	0.0805761	-0.374629	0.306509	-0.089372	0.114069	0.0290189	0.252291	-0.0869472	0.0841277			0.0350715	0.191441	0.0638136
6.06929	0.0855796	-0.372464	0.311135	-0.0947398	0.11453	0.0331933	0.249082	-0.085349	0.076809			0.0353083	0.191502	0.0638341
6.16759	0.091001	-0.369743	0.315329	-0.0995522	0.114997	0.0376735	0.245961	-0.0837245	0.068474			0.0356018	0.191417	0.0638058
6.2659	0.0968038	-0.366462	0.319327	-0.103917	0.115623	0.0424138	0.243009	-0.0821045	0.0591106			0.0359781	0.191265	0.063755
6.3642	0.102932	-0.362846	0.323134	-0.107843	0.116367	0.0474637	0.240276	-0.0805066	0.0487935			0.036419	0.191122	0.0637074
6.4625	0.109286	-0.358998	0.326536	-0.111649	0.117183	0.0528688	0.237854	-0.0790397	0.0376292			0.0368523	0.191037	0.063679
6.56081	0.115843	-0.354824	0.329499	-0.115481	0.118042	0.0586439	0.235687	-0.0777776	0.0256718			0.037256	0.19101	0.0636699
6.65911	0.122581	-0.3504	0.332183	-0.119411	0.118992	0.0646799	0.233645	-0.076628	0.0129775			0.0376244	0.191091	0.0636971
6.75742	0.129481	-0.345587	0.334632	-0.123455	0.119998	0.0709451	0.231788	-0.0757299	-0.000427951			0.0379605	0.191294	0.0637646
6.85572	0.136514	-0.340587	0.336842	-0.127644	0.121059	0.0773654	0.230117	-0.0751572	-0.014325			0.0382427	0.191682	0.0638939
6.95402	0.14371	-0.335381	0.338747	-0.131947	0.122323	0.0838221	0.228663	-0.0749316	-0.0285595			0.0384941	0.192256	0.0640855
7.05233	0.150993	-0.330027	0.340782	-0.136229	0.123683	0.0902529	0.227366	-0.0751262	-0.0429262			0.038752	0.193079	0.0643598
7.15063	0.15837	-0.324614	0.342865	-0.140672	0.125142	0.0967701	0.226126	-0.0757662	-0.0573199			0.0389891	0.194166	0.0647219
7.24894	0.165879	-0.319063	0.345122	-0.145121	0.126712	0.103439	0.224876	-0.0768132	-0.0716355			0.0392661	0.195496	0.0651652
7.34724	0.173463	-0.313631	0.347292	-0.149518	0.128248	0.110152	0.223563	-0.0782249	-0.0858424			0.0395003	0.197041	0.0656805
7.44554	0.180995	-0.308093	0.349111	-0.15396	0.129711	0.11683	0.222132	-0.0799555	-0.0995895			0.0396867	0.198666	0.0662221
7.54385	0.188399	-0.302438	0.35063	-0.158398	0.131123	0.123467	0.220622	-0.0819277	-0.112725			0.0398612	0.20034	0.06678
7.64215	0.195618	-0.296934	0.351871	-0.162927	0.132587	0.130033	0.218979	-0.0840899	-0.125178			0.0399953	0.202094	0.0673647
7.74046	0.202591	-0.291466	0.352662	-0.16744	0.134095	0.136547	0.21729	-0.086464	-0.136965			0.0400944	0.203855	0.0679516
7.83876	0.209344	-0.285733	0.352789	-0.172019	0.135622	0.143035	0.215562	-0.0889872	-0.147987			0.0401806	0.205515	0.068505
7.93706	0.215897	-0.279689	0.352255	-0.17665	0.137171	0.149555	0.213699	-0.0916424	-0.158252			0.0402604	0.207051	0.0690169
8.03537	0.222171	-0.273511	0.351237	-0.181304	0.138778	0.155984	0.211756	-0.0944081	-0.167688			0.0403348	0.208494	0.0694979
8.13367	0.228108	-0.267368	0.349712	-0.185906	0.140451	0.162355	0.209688	-0.097274	-0.176275			0.0403879	0.209838	0.069946
8.23198	0.233688	-0.260958	0.347605	-0.190395	0.142139	0.168743	0.207505	-0.100188	-0.184016			0.040458	0.211001	0.0703337
8.33028	0.238854	-0.254337	0.344816	-0.19463	0.143737	0.175054	0.205198	-0.103063	-0.190979			0.0405167	0.211935	0.0706451
8.42858	0.243575	-0.247453	0.341271	-0.198651	0.145284	0.181251	0.202617	-0.105812	-0.197279			0.0405337	0.212611	0.0708703
8.52689	0.247877	-0.240276	0.336965	-0.202333	0.146899	0.187273	0.199831	-0.108433	-0.202879			0.0405472	0.213011	0.0710037
8.62519	0.251817	-0.233007	0.332035	-0.205678	0.148577	0.193089	0.197017	-0.110916	-0.207723			0.0405791	0.213193	0.0710642
8.72349	0.255413	-0.225612	0.326223	-0.208647	0.150202	0.198721	0.194424	-0.113307	-0.211777			0.0406266	0.213119	0.0710396
8.8218	0.258591	-0.218103	0.319751	-0.211161	0.151736	0.204097	0.192008	-0.115434	-0.215009			0.0407198	0.212771	0.0709238
8.9201	0.261327	-0.210467	0.312637	-0.213233	0.153161	0.209276	0.189763	-0.117248	-0.217498			0.0408575	0.212156	0.0707187
9.01841	0.263583	-0.202769	0.304724	-0.214914	0.154392	0.214326	0.187742	-0.11872	-0.21925			0.0410128	0.211261	0.0704204
9.11671	0.265376	-0.194915	0.295666	-0.216426	0.155478	0.219303	0.186027	-0.119766	-0.220387			0.0411507	0.210085	0.0700284
9.21501	0.266658	-0.186911	0.285575	-0.217733	0.156358	0.224101	0.18467	-0.120347	-0.220963			0.0412675	0.208635	0.0695449
9.31332	0.267383	-0.179058	0.274534	-0.219083	0.157024	0.228696	0.183744	-0.12049	-0.221116			0.0412926	0.207017	0.0690058
9.41162	0.267523	-0.171343	0.262709	-0.220647	0.157565	0.233081	0.183299	-0.120265	-0.220902			0.0412243	0.205303	0.0684345
9.50993	0.267146	-0.163872	0.250343	-0.222464	0.157946	0.237286	0.183435	-0.119775	-0.220553			0.0410544	0.203607	0.0678691
9.60823	0.266281	-0.156614	0.237787	-0.224596	0.158071	0.241233	0.184171	-0.118986	-0.220077			0.0408077	0.201969	0.0673229
9.70653	0.264934	-0.149432	0.224993	-0.227005	0.15788	0.244922	0.185588	-0.117962	-0.21948			0.0404931	0.200377	0.0667923
9.80484	0.263057	-0.142552	0.212277	-0.229728	0.157412	0.248368	0.18761	-0.116785	-0.218755			0.0401005	0.198897	0.0662989
9.90314	0.260646	-0.136238	0.199691	-0.232764	0.15673	0.25152	0.190146	-0.115473	-0.218034			0.0395805	0.197571	0.0658569
10.0014	0.257743	-0.130496	0.187301	-0.236185	0.155768	0.254366	0.193225	-0.114076	-0.217211			0.0389373	0.196405	0.0654685
10.0998	0.254402	-0.12527	0.175068	-0.240025	0.154527	0.256988	0.196765	-0.11259	-0.21638			0.0381651	0.19542	0.0651399
10.1981	0.250686	-0.120689	0.163053	-0.24437	0.152962	0.259261	0.200797	-0.110964	-0.215558			0.037242	0.194634	0.0648779
10.2964	0.246622	-0.117082	0.151396	-0.249222	0.15114	0.261171	0.205322	-0.109259	-0.214687			0.0361557	0.19409	0.0646965
10.3947	0.24221	-0.114371	0.140039	-0.254706	0.149112	0.262801	0.210318	-0.107544	-0.21365			0.0349122	0.193795	0.0645982
10.493	0.237411	-0.112447	0.128939	-0.260868	0.14687	0.264143	0.215976	-0.105889	-0.212296			0.0335376	0.193745	0.0645815
10.5913	0.232199	-0.111288	0.11827	-0.267723	0.144401	0.265245	0.22211	-0.104215	-0.210721			0.0320309	0.193946	0.0646486
10.6896	0.226519	-0.110803	0.107907	-0.275171	0.141709	0.266101	0.228549	-0.102517	-0.209			0.0303661	0.194356	0.0647853
10.7879	0.220389	-0.110929	0.0980717	-0.28324	0.138878	0.266747	0.235154	-0.100802	-0.207072			0.0285774	0.194978	0.0649927
10.8862	0.213855	-0.111833	0.0886974	-0.291971	0.135958	0.267258	0.241877	-0.0991505	-0.204978			0.0266347	0.195855	0.0652851
10.9845	0.206903	-0.113544	0.0797835	-0.30131	0.1329	0.267597	0.248688	-0.0975911	-0.202643			0.0245315	0.196961	0.0656536
11.0828	0.199545	-0.116025	0.0715873	-0.311204	0.129753	0.267726	0.255425	-0.0961417	-0.200164			0.022278	0.198284	0.0660947
11.1811	0.191801	-0.119396	0.0642631	-0.321389	0.12648	0.267657	0.262004	-0.0948346	-0.197476			0.0199011	0.19977	0.0665901
11.2794	0.183704	-0.12362	0.0577341	-0.331624	0.123083	0.267431	0.268395	-0.0936419	-0.194537			0.0174359	0.201361	0.0671205
11.3777	0.175276	-0.128317	0.0517433	-0.341789	0.119545	0.266943	0.274506	-0.0924863	-0.191264			0.0149061	0.202957	0.0676522
11.476	0.166642	-0.133406	0.0462086	-0.351606	0.115922	0.266161	0.280272	-0.0912678	-0.187548			0.0123753	0.204474	0.068158
11.5743	0.157829	-0.138938	0.041127	-0.36086	0.112307	0.26508	0.285612	-0.0898949	-0.18331			0.00988361	0.205854	0.0686181
11.6726	0.14885	-0.144965	0.0361268	-0.36946	0.108788	0.263777	0.290502	-0.0883947	-0.178504			0.00741343	0.207087	0.0690289
11.7709	0.139785	-0.151479	0.0314575	-0.37736	0.10531	0.262181	0.294748	-0.0866038	-0.173103			0.0049928	0.208119	0.069373
11.8692	0.130717	-0.158359	0.0269422	-0.384574	0.101837	0.260296	0.298347	-0.0843514	-0.16725			0.00262271	0.208952	0.0696507
11.9675	0.121671	-0.165553	0.0224931	-0.391029	0.0982815	0.25814	0.301344	-0.0814844	-0.16091			0.000328163	0.209565	0.0698549
12.0658	0.112652	-0.173008	0.0179996	-0.396621	0.094805	0.255671	0.303725	-0.0779419	-0.154211			-0.00188113	0.209943	0.0699809
12.1641	0.103633	-0.180751	0.013472	-0.401334	0.0913288	0.252913	0.30552	-0.0737235	-0.14717			-0.00401236	0.210095	0.0700317
12.2624	0.0946355	-0.188541	0.00897949	-0.405163	0.0879177	0.249958	0.306723	-0.068872	-0.139855			-0.00602417	0.210028	0.0700092
12.3607	0.0856732	-0.196149	0.00460317	-0.408153	0.0846249	0.246819	0.307299	-0.0633291	-0.132361			-0.00788583	0.209737	0.0699125
12.459	0.0768776	-0.203603	0.0003507	-0.4102	0.081377	0.243516	0.307222	-0.0570503	-0.124846			-0.00959506	0.209218	0.0697392
12.5573	0.0683544	-0.211039	-0.00351575	-0.411184	0.0781513	0.240008	0.306397	-0.0500753	-0.117466			-0.0111522	0.208452	0.0694841
12.6557	0.0602004	-0.218512	-0.00708352	-0.411121	0.0748569	0.2363	0.304895	-0.0423883	-0.110213			-0.0125628	0.207463	0.0691543
12.754	0.0524919	-0.226054	-0.0101226	-0.410143	0.0715239	0.232392	0.302696	-0.0340173	-0.103124			-0.0138175	0.206289	0.068763
12.8523	0.0452061	-0.233787	-0.0128468	-0.408295	0.0681653	0.228242	0.299804	-0.0249577	-0.0963991			-0.0149853	0.204963	0.0683209
12.9506	0.038462	-0.241499	-0.0153319	-0.405604	0.0647489	0.22378	0.296262	-0.0152536	-0.0900047			-0.0160489	0.203472	0.0678239
13.0489	0.0323916	-0.249101	-0.0175421	-0.402119	0.061318	0.219013	0.292088	-0.00492724	-0.0841238			-0.0170002	0.201839	0.0672796
13.1472	0.027032	-0.256612	-0.0196721	-0.397883	0.0578604	0.213955	0.287391	0.0060124	-0.0788197			-0.0178596	0.200104	0.0667013
13.2455	0.0224235	-0.264024	-0.0216324	-0.393012	0.0545294	0.208598	0.282173	0.0175071	-0.0740712			-0.018612	0.198304	0.0661014
13.3438	0.0185542	-0.271391	-0.023515	-0.387837	0.0513453	0.203012	0.27642	0.0294066	-0.0699468			-0.0193279	0.196531	0.0655105
13.4421	0.0154689	-0.278888	-0.0251337	-0.382386	0.04834	0.197289	0.270246	0.0415074	-0.0664943			-0.0200056	0.194851	0.0649505
13.5404	0.0130457	-0.286505	-0.0263877	-0.376797	0.0454231	0.191536	0.263622	0.0537129	-0.0637523			-0.0206779	0.193297	0.0644324
13.6387	0.0112136	-0.294242	-0.0274623	-0.37122	0.0425297	0.185817	0.256505	0.0659884	-0.0617672			-0.0214043	0.191903	0.0639676
13.737	0.00994659	-0.30197	-0.0282196	-0.365668	0.0396683	0.180124	0.248855	0.0782642	-0.0606483			-0.0221831	0.190647	0.0635489
13.8353	0.00920227	-0.30972	-0.0290472	-0.360177	0.0370278	0.174538	0.24084	0.0903286	-0.0605049			-0.023057	0.189577	0.0631924
13.9336	0.00892033	-0.317355	-0.0298436	-0.354769	0.0346257	0.169096	0.232513	0.102047	-0.0612278			-0.0239992	0.188673	0.0628911
14.0319	0.00904048	-0.324817	-0.0304394	-0.349499	0.0325548	0.163803	0.223895	0.113176	-0.0627818			-0.0250076	0.187914	0.0626381
14.1302	0.00953084	-0.332212	-0.0306822	-0.344433	0.0308061	0.158708	0.214963	0.123683	-0.0650834			-0.0260799	0.187317	0.062439
14.2285	0.0104459	-0.339442	-0.0305558	-0.339542	0.0294865	0.153698	0.205684	0.133584	-0.0679792			-0.0271802	0.186836	0.0622785
14.3268	0.0117513	-0.346582	-0.0302964	-0.334727	0.0285297	0.148722	0.196051	0.142837	-0.0713709			-0.0283429	0.186444	0.062148
14.4251	0.013442	-0.353636	-0.0301735	-0.329902	0.0279288	0.143866	0.186133	0.151433	-0.0751494			-0.029562	0.186137	0.0620456
14.5234	0.0154694	-0.360646	-0.0300395	-0.325033	0.0277836	0.13908	0.175929	0.159407	-0.0790867			-0.0307929	0.185907	0.0619688
14.6217	0.0177433	-0.367554	-0.0302737	-0.320132	0.02818	0.134452	0.165428	0.166783	-0.0830862			-0.0320511	0.185749	0.0619163
14.72	0.0202103	-0.374247	-0.0308035	-0.315076	0.0291594	0.129878	0.154581	0.173537	-0.0870293			-0.0333101	0.185595	0.0618649
14.8183	0.022835	-0.380745	-0.0319184	-0.309694	0.0306766	0.125408	0.143478	0.179703	-0.0908371			-0.0345661	0.185431	0.0618104
14.9166	0.0256323	-0.386877	-0.0333177	-0.303928	0.032728	0.121098	0.132188	0.185295	-0.0943747			-0.0357284	0.185225	0.0617417
15.0149	0.0284925	-0.392687	-0.0348799	-0.297781	0.0354406	0.116931	0.120709	0.19037	-0.097595			-0.0367777	0.184992	0.0616639
15.1133	0.0312925	-0.398198	-0.0366609	-0.291255	0.0388967	0.112964	0.109026	0.194961	-0.100319			-0.0376991	0.184739	0.0615798
15.2116	0.0340278	-0.403284	-0.0384375	-0.284355	0.0431256	0.109234	0.097133	0.19912	-0.102489			-0.038436	0.184455	0.0614851
15.3099	0.0366393	-0.407825	-0.0403456	-0.277103	0.0479746	0.105662	0.0850603	0.202929	-0.104218			-0.0390252	0.184124	0.0613745
15.4082	0.0391705	-0.411727	-0.0423671	-0.269316	0.0535211	0.102233	0.0728484	0.206538	-0.105524			-0.0394026	0.183734	0.0612446
15.5065	0.0416412	-0.415051	-0.0444517	-0.260903	0.0597149	0.0989474	0.0603962	0.210153	-0.106412			-0.0395517	0.183321	0.0611071
15.6048	0.044147	-0.417864	-0.0465963	-0.251926	0.0665477	0.0957613	0.0477796	0.213856	-0.106827			-0.039458	0.182943	0.0609809
15.7031	0.0467664	-0.419965	-0.0485906	-0.242456	0.0740685	0.0926545	0.0350836	0.217711	-0.106715			-0.0390492	0.182595	0.060865
15.8014	0.0494925	-0.421477	-0.0505821	-0.232563	0.0822113	0.089546	0.0223091	0.221772	-0.106062			-0.0383726	0.182328	0.060776
15.8997	0.052372	-0.422333	-0.0523154	-0.222272	0.090856	0.0864348	0.0093714	0.226182	-0.104796			-0.0373889	0.182155	0.0607182
15.998	0.0554522	-0.422624	-0.0537634	-0.211605	0.0999941	0.0832903	-0.00383068	0.231016	-0.102947			-0.036113	0.182127	0.0607091
16.0963	0.0587968	-0.422378	-0.0548912	-0.200569	0.109536	0.0800791	-0.0172914	0.236405	-0.100498			-0.0345347	0.182289	0.0607631
16.1946	0.0624678	-0.421418	-0.0559272	-0.189215	0.119406	0.0767371	-0.0309794	0.242335	-0.0974946			-0.0326764	0.182621	0.0608736
[truncated: 2,889 more rows]

## Sheet: IP CCK_KO
TimeStamp	KO-0305_re	KO-0407-1 side_re	KO-0407-2 side_re	KO-0411-1 side_re	KO_0411_2 side_re	KO_0613_re	KO-0718-2 side_re		N=n=7	sd	se
[truncated: 4,275 more rows]

[truncated: 1 more sheets: IP saline_CCK-KO]
