# Supplementary material for: Cholecystokinin modulates age-dependent thalamocortical neuroplasticity
Source: eLife journal article supplement (doi:10.7554/elife.101513), 2024-10-14
Supplement: data1 [file MGB virus CCK Fig4F.xlsx]

## Sheet: control
	201208-1-3	201209-1-4	201210-1-4	201217-1-1	210104-1-1	210106-1-3	210107-1-2	210111-1-3	210114-1-3	210118-1-4		201217-1-2	201217-1-3	210104-1-1	210106-1	210106-2	210111-1-3	210111-1-4	210111-1-3	210114-1-1	210114-1-4						4.80717e-07	5.70918e-07	6.08062e-05	3.63358e-07		2.89079e-06	1.48296e-06	8.24703e-07	4.04654e-05	1.37691e-06		3.98265e-07	5.2002e-07	1.61444e-06	8.76461e-06	2.59297e-06	8.30711e-07	5.56669e-07	0.000178297	8.91315e-07	1.1954e-06
	3.61569e-07	5.91998e-07	7.00622e-05	3.79447e-07	0.000262872	3.04417e-06	1.46564e-06	7.98791e-07	4.00932e-05	1.34421e-06		3.66585e-07	5.44589e-07	1.56643e-06	9.21125e-06	2.77365e-06	8.83709e-07	5.3161e-07	0.000179935	9.08614e-07	1.00913e-06						0.752145	1.03692	1.15222	1.04428		1.05306	0.988321	0.96858	0.990802	0.976256		0.920455	1.04725	0.970259	1.05096	1.06968	1.0638	0.954983	1.00919	1.01941	0.844176
	4.16866e-07	5.56949e-07	5.80737e-05	3.38082e-07	0.00029247	2.58576e-06	1.48294e-06	8.16992e-07	4.43689e-05	1.39768e-06		4.00323e-07	5.09207e-07	1.63071e-06	8.80612e-06	2.78091e-06	8.06031e-07	5.1659e-07	0.000184413	8.57204e-07	1.40241e-06						0.867176	0.975532	0.955061	0.93044		0.894481	0.999987	0.99065	1.09646	1.01509		1.00517	0.979207	1.01007	1.00474	1.07248	0.97029	0.928002	1.03431	0.961729	1.17318
	3.80509e-07	5.61144e-07	5.33452e-05	3.66638e-07	0.000256915	3.11372e-06	1.5542e-06	8.88822e-07	3.33927e-05	1.39003e-06		3.42176e-07	4.87704e-07	1.54256e-06	8.60239e-06	2.53796e-06	7.98791e-07	6.41193e-07	0.00018605	9.08e-07	1.17846e-06						0.791545	0.98288	0.877299	1.00903		1.07712	1.04804	1.07775	0.825216	1.00953		0.859169	0.937857	0.955477	0.981491	0.978782	0.961575	1.15184	1.04348	1.01872	0.985828
	5.74162e-07	4.88624e-07	7.00492e-05	3.70103e-07	0.000295549	2.50361e-06	1.47894e-06	7.85089e-07	3.47814e-05	1.29683e-06		4.71332e-07	5.25496e-07	1.67422e-06	8.81523e-06	2.12202e-06	8.16992e-07	5.72595e-07	0.000175243	9.64093e-07	1.25388e-06						1.19439	0.855857	1.15201	1.01856		0.866063	0.997289	0.951966	0.859534	0.941842		1.18347	1.01053	1.03702	1.00577	0.818372	0.983485	1.02861	0.982871	1.08165	1.04892
	5.52809e-07	6.31321e-07	6.58161e-05	3.86794e-07	0.000268607	2.52023e-06	1.56114e-06	7.8433e-07	4.14782e-05	1.38354e-06		3.65037e-07	5.20218e-07	1.63346e-06	7.98381e-06	2.73453e-06	8.88822e-07	5.26863e-07	0.000184476	8.53159e-07	1.07847e-06						1.14997	1.1058	1.08239	1.0645		0.871813	1.05272	0.951045	1.02503	1.00481		0.916569	1.00038	1.01178	0.910914	1.05459	1.06995	0.946456	1.03466	0.957191	0.902186
	4.78452e-07	6.33674e-07	4.8114e-05	4.20049e-07	0.000228841	3.23658e-06	1.56926e-06	8.81927e-07	4.80409e-05	1.4111e-06		4.68195e-07	5.22095e-07	1.49116e-06	8.51371e-06	2.2206e-06	7.85089e-07	5.17068e-07	0.000165975	9.16797e-07	1.27191e-06						0.995289	1.10992	0.791268	1.15602		1.11962	1.05819	1.06939	1.18721	1.02483		1.17559	1.00399	0.923637	0.971373	0.856391	0.945081	0.92886	0.93089	1.02859	1.06401
	5.45798e-07	5.23918e-07	5.73177e-05	3.47568e-07	0.000228354	3.16049e-06	1.39924e-06	7.37025e-07	3.73776e-05	1.4326e-06		3.8246e-07	5.12235e-07	1.75557e-06	9.13141e-06	2.68672e-06	7.8433e-07	5.55414e-07	0.0001845	8.66158e-07	1.15321e-06						1.13538	0.917676	0.942628	0.956544		1.09329	0.943546	0.893686	0.923692	1.04045		0.960318	0.985031	1.08742	1.04185	1.03615	0.944167	0.997745	1.03479	0.971774	0.964706
	5.35571e-07	5.79716e-07	6.36717e-05	2.98179e-07	0.000253129	2.96177e-06	1.35233e-06	9.04649e-07	4.41905e-05	1.35927e-06		3.90007e-07	5.38612e-07	1.62144e-06	9.05299e-06	2.88741e-06	8.81927e-07	5.92023e-07	0.000165782	8.56499e-07	1.21572e-06						1.11411	1.01541	1.04713	0.820622		1.02455	0.911913	1.09694	1.09205	0.987193		0.979266	1.03575	1.00433	1.0329	1.11355	1.06165	1.06351	0.929812	0.960939	1.017
																																						0	0	0	0	0	0	0	0	0	0
																											1.11783	1.00093	1.00308	1.00325		0.995068	0.992731	0.992605	1.0175	0.999825		1.04304	1.00714	1.01284	0.992563	0.975813	1.00087	0.993036	0.982604	1.00003	0.999364
																													0									0	0	0	0	0	0	0	0	0	0
	8.3557e-07	5.77048e-07	7.72316e-05	3.42233e-07	0.000228689	3.12075e-06	1.41643e-06	8.12466e-07	4.27043e-05			4.25735e-07		1.48415e-06	9.46817e-06	2.78645e-06	8.12466e-07	6.43287e-07	0.000168849	9.15021e-07	1.01964e-06						1.12607	1.01074	1.27013	0.941863		1.07955	0.955138	0.985162	1.05533			1.06898	1.00903	0.919294	1.08027	1.07461	0.978037	1.1556	0.947014	1.0266	0.852972
	5.4132e-07	7.1889e-07	6.44115e-05	3.28674e-07	0.000294132	2.97627e-06	1.36713e-06	1.10963e-06	3.40819e-05			3.96506e-07	5.24714e-07	1.69239e-06	9.52835e-06	2.63817e-06	1.26669e-06	6.77312e-07	0.00016913	9.89051e-07	1.26428e-06						0.771318	1.25918	1.05929	0.904546		1.02957	0.921891	1.34549	0.842247			0.995586	0.752775	1.04828	1.08714	1.01743	1.52483	1.21672	0.94859	1.10965	1.05762
	3.70786e-07	5.53409e-07	4.40056e-05	2.81972e-07	0.000278377	2.89631e-06	1.48647e-06	1.07046e-06	4.60074e-05			5.92056e-07	3.91457e-07	1.50633e-06	8.89153e-06	2.59081e-06	1.10963e-06	5.70501e-07	0.000169577	8.35549e-07	1.2996e-06						0.869424	0.969332	0.723703	0.776019		1.00191	1.00237	1.29799	1.13696			1.48659	0.889514	0.933034	1.01448	0.999166	1.33576	1.02485	0.951093	0.937434	1.08716
	4.17947e-07	5.98587e-07	6.2319e-05	4.73812e-07	0.000219478	2.76317e-06	1.26621e-06	6.21658e-07	2.91728e-05			3.52038e-07	4.62565e-07	1.63727e-06	8.94869e-06	2.44632e-06	1.07046e-06	5.90647e-07	0.000171972	8.1633e-07							1.05138	1.04846	1.02488	1.30398		0.955852	0.853838	0.753796	0.720931			0.883929	1.06707	1.01414	1.021	0.943443	1.2886	1.06104	0.96453	0.915871	1.14291
	5.05414e-07	6.07806e-07	6.41937e-05	3.61919e-07	0.000281148	3.0809e-06	1.30729e-06	6.44577e-07	4.99226e-05			5.08096e-07	5.549e-07	1.76044e-06	8.09673e-06	2.11572e-06	6.21658e-07	5.20614e-07	0.000178613	8.20088e-07	1.36623e-06						0.650821	1.06461	1.05571	0.996041		1.06576	0.881537	0.781587	1.23371			1.27577	1.16801	1.09043	0.923797	0.815942	0.748344	0.93523	1.00177	0.920087	0.974433
	1.43477e-07	5.68099e-07	8.91213e-05	3.66924e-07	0.000219092	3.10534e-06	1.41712e-06	6.36523e-07	4.15772e-05			3.57461e-07	6.07388e-07	1.49606e-06	8.50759e-06	2.55262e-06	6.44577e-07	6.85853e-07	0.000175862	1.02924e-06	1.16484e-06						1.0776	0.995062	1.46566	1.00981		1.07422	0.955604	0.77182	1.02747			0.897546	1.36971	0.926673	0.970674	0.984437	0.775934	1.23206	0.986346	1.15475	0.973257
	3.12861e-07	5.68136e-07	9.02455e-05	4.85572e-07	0.000232225	3.01278e-06	1.52905e-06	8.36844e-07	4.82655e-05			3.31823e-07	7.12274e-07	1.66642e-06	8.6003e-06	2.73281e-06	6.36523e-07	5.48125e-07	0.000157422	8.24391e-07	1.16343e-06						0.85684	0.995127	1.48415	1.33635		1.0422	1.03107	1.01472	1.19276	1.05273		0.833174	0.969193	1.0322	0.981252	1.05393	0.766238	0.984651	0.882924	0.924915	0.977903
	5.18023e-07	5.26952e-07	6.33612e-05	4.2193e-07	0.000268746	2.34645e-06	1.47773e-06	7.98202e-07	4.2812e-05	1.44952e-06		5.65222e-07		1.64207e-06	8.56199e-06	2.50077e-06	8.36844e-07	5.20085e-07	0.000162026	8.99874e-07	1.16898e-06						0.792152	0.922991	1.04202	1.1612		0.811698	0.99647	0.967865	1.05799	0.861527		1.41921	1.24793	1.01711	0.976882	0.964442	1.00738	0.934281	0.908743	1.0096	0.973399
	4.11897e-07	5.78621e-07	6.38342e-05	4.40013e-07	0.000204623	2.67736e-06	1.30534e-06	8.25094e-07	3.40323e-05	1.18624e-06		3.23062e-07	5.03999e-07	1.66464e-06	7.95e-06	2.4439e-06	7.98202e-07	6.39177e-07	0.000171577	1.02214e-06	1.1636e-06						0.930089	1.01349	1.0498	1.21096		0.926167	0.880227	1.00047	0.841021	1.04105		0.811173	1.35443	1.03109	0.907057	0.942508	0.960865	1.14822	0.962313	1.14678	0.872936
	1.92137e-07	5.79174e-07	6.27136e-05	3.13279e-07	0.000300918	2.54531e-06	1.2695e-06	6.35919e-07	3.96685e-05	1.43343e-06			6.48946e-07	1.74862e-06	7.78533e-06	2.33179e-06	8.25094e-07	4.83837e-07	0.000157303	8.80843e-07	1.04351e-06						0.893221	1.01446	1.03137	0.862178		0.88049	0.856058	0.771088	0.980305	1.0517		1.37361	0.802008	1.08311	0.888269	0.899272	0.993237	0.869163	0.882255	0.988251	1.24205
	3.80801e-07	5.6199e-07	8.9445e-05	3.0347e-07	0.000244099	2.9919e-06	1.22343e-06	1.0168e-06	4.84486e-05	1.44809e-06		5.47058e-07	7.04332e-07	1.67703e-06	7.83184e-06	1.88837e-06	6.35919e-07	6.17448e-07	0.000170156	8.52288e-07	1.48474e-06						0.662548	0.984363	1.47098	0.835183		1.03497	0.824992	1.23293	1.19728	1.04796		0.883677	1.18453	1.03876	0.893575	0.728262	0.765511	1.10918	0.954344	0.956214	1.03778
	4.47109e-07	4.81405e-07	7.48129e-05	2.69214e-07	0.000198804	3.12284e-06	1.22064e-06	1.00255e-06	4.42216e-05	1.44294e-06		3.51937e-07	4.1706e-07	1.58136e-06	8.36256e-06	2.185e-06	1.20408e-06	5.38988e-07	0.000165518	8.56531e-07	1.24057e-06						1.11913	0.843211	1.23035	0.740907		1.08027	0.823109	1.21565	1.09282	1.05175		1.10618	0.795698	0.979508	0.954128	0.842663	1.44946	0.968238	0.92833	0.960974	1.10601
	4.29386e-07	6.24891e-07	8.37487e-05	3.32906e-07	0.000215478	2.68457e-06	1.46472e-06	1.05157e-06	4.15738e-05	1.44816e-06		4.40554e-07	6.15981e-07	1.77886e-06	8.63236e-06	2.54156e-06	1.0168e-06	6.06729e-07	0.000159213	9.33986e-07	1.32213e-06						0.939893	1.09454	1.3773	0.916194		0.928661	0.987697	1.27509	1.02739	0.922434		0.782634	1.07361	1.10184	0.98491	0.980172	1.22401	1.08993	0.892966	1.04787	0.902402
	3.18498e-07	5.54969e-07	0.000103561	3.81239e-07	0.000313361	2.63505e-06	1.33452e-06	7.48129e-07	4.1172e-05	1.27011e-06		3.11695e-07	4.13778e-07	1.60483e-06	8.38302e-06	2.74267e-06	1.00255e-06	5.56804e-07	0.000170479	1.03408e-06	1.07873e-06						0.801657	0.972064	1.70314	1.04921		0.911534	0.899902	0.907149	1.01746	0.99202		0.762213	1.0199	0.994044	0.956462	1.05773	1.20686	1.00024	0.956152	1.16017	0.969713
	5.37984e-07	7.0134e-07	6.07362e-05	2.54482e-07	0.000312938	2.35593e-06	1.24678e-06	9.88912e-07	5.55662e-05	1.36592e-06		3.03562e-07	5.58301e-07	1.62171e-06	8.04152e-06	2.28535e-06	1.05157e-06	5.67374e-07	0.000169893	9.02091e-07	1.15919e-06						0.71769	1.22844	0.998848	0.700362		0.814979	0.840735	1.19911	1.37318	0.89685		1.40875	0.640482	1.0045	0.917498	0.881361	1.26587	1.01923	0.952867	1.01209	1.1565
	1.9696e-07	6.02567e-07	0.000129955	3.00137e-07	0.000219819	2.6962e-06	1.32924e-06	8.85439e-07	4.34797e-05	1.23488e-06		5.61055e-07	5.30369e-07	1.58673e-06	7.7583e-06	2.61295e-06	7.48129e-07	6.67336e-07	0.000179072	9.56314e-07	1.38248e-06						0.890359	1.05543	1.19819	0.826009		0.932685	0.896342	1.07365	1.07449	1.06279		0.753402	1.39697	0.982831	0.885184	1.0077	0.900588	1.1988	1.00435	1.07292	0.990484
	4.51822e-07	7.33872e-07	7.28572e-05	3.51138e-07	0.000281319	3.03047e-06	1.43487e-06	5.59707e-07	4.19631e-05	1.46336e-06		3.00053e-07	3.33063e-07	1.55317e-06	8.00998e-06	2.77515e-06	9.88912e-07	4.58673e-07	0.000184709	9.70528e-07	1.18402e-06						0.556554	1.28542	1.17407	0.966371		1.04832	0.967572	0.678677	1.03701	0.99114		0.633292	1.06688	0.962046	0.9139	1.07026	1.19044	0.823959	1.03597	1.08887	1.06541
	3.8537e-07	5.62675e-07	5.1344e-05	3.9684e-07	0.000268027	3.12406e-06	1.13141e-06	5.11511e-07	5.17313e-05	1.36471e-06		2.52218e-07	7.26453e-07	1.53938e-06	8.32982e-06	2.21189e-06	8.85439e-07	5.49005e-07	0.000158865	8.65279e-07	1.27358e-06						0.801225	0.985561	1.82873	1.09215		1.08069	0.762941	0.620236	1.27841	1.00066		1.07546	1.02239	0.953506	0.950392	0.853031	1.06588	0.986232	0.891013	0.970788	1.06359
	3.45006e-07	6.06035e-07	7.13905e-05	3.12795e-07	0.00024032	2.89607e-06	1.30103e-06	7.17788e-07	3.12243e-05	1.37782e-06		4.28319e-07	5.54799e-07	1.63473e-06	8.46841e-06	2.65764e-06	5.59707e-07	4.84499e-07	0.000167987	8.83649e-07	1.27142e-06						0.597309	1.06151	1.64075	0.860846		1.00183	0.877316	0.870359	0.771629	0.959469		1.26353	1.25764	1.01257	0.966205	1.02494	0.673768	1.19481	0.942174	0.991398	1.15022
	4.2801e-07	5.44429e-07	0.000111198	4.46649e-07	0.000225474	2.4308e-06	1.29339e-06	1.02741e-06	3.95948e-05	1.3211e-06			5.31661e-07	1.40724e-06	8.10029e-06	2.25818e-06	5.11511e-07	6.65113e-07	0.000166893	9.49178e-07	1.37497e-06						1.08781	1.16924	1.23834	1.22923		0.840878	0.872163	1.24579	0.978484	1.02992		1.0342	0.784802	0.871654	0.924204	0.870884	0.61575	0.955742	0.936039	1.06492	0.914677
	2.67545e-07	6.6754e-07	9.97677e-05	4.33283e-07	0.000240993	2.99563e-06	1.36537e-06	7.27094e-07	3.35635e-05	1.4181e-06		5.03221e-07	6.53995e-07	1.77506e-06	7.81479e-06	1.9889e-06	7.17788e-07	5.32033e-07	0.00015965	8.33443e-07	1.0934e-06						0.701343	0.74587	1.50455	1.19244		1.03627	0.920704	0.881643	0.829437	1.06016		0.862967	1.30348	1.09949	0.891629	0.767036	0.864064	1.23002	0.895416	0.93507	0.962439
	3.85163e-07	4.25831e-07	7.52986e-05	4.07459e-07	0.00024612	2.51446e-06	1.20739e-06	7.51323e-07	3.42547e-05	1.45974e-06		4.11887e-07	4.08112e-07	1.55342e-06	8.37198e-06	2.32295e-06	1.02741e-06	6.84716e-07	0.000163679	8.31522e-07	1.1505e-06						0.689371	0.907664	1.33371	1.12137		0.869818	0.814175	0.911022	0.846517	0.966728		1.15401	1.11307	0.962199	0.955202	0.895864	1.23678	1.0913	0.918014	0.932915	1.00578
	2.87137e-07	5.18202e-07	5.39404e-05	4.59616e-07	0.000244214	2.62163e-06	1.30948e-06	6.96713e-07	4.78904e-05	1.33109e-06		3.43689e-07	6.77837e-07	1.54445e-06	7.69121e-06	2.48694e-06	7.27094e-07	4.20761e-07	0.000163056	9.11659e-07	1.2023e-06						0.573387	1.11763	2.05022	1.26491		0.90689	0.883013	0.844804	1.18349	1.02636		1.01141	1.19085	0.956642	0.87753	0.959107	0.875266	0.957409	0.914519	1.02282	0.92977
	5.2293e-07	6.38077e-07	0.000150868	4.04043e-07	0.000307937	2.97077e-06	1.32277e-06	9.23377e-07	3.62787e-05	1.4132e-06		4.59603e-07	3.04205e-07	1.60639e-06	7.99967e-06	2.33664e-06	7.51323e-07	6.07493e-07	0.000170172	9.73892e-07	1.11145e-06						0.635841	1.05053	1.33229	1.11197		1.02767	0.89198	1.11965	0.896535	0.988435		1.32095	1.10196	0.995011	0.912723	0.901142	0.904433	0.873	0.954433	1.09265	0.972595
	3.37147e-07	5.99766e-07	4.21743e-05	3.04108e-07	0.00027409	2.87389e-06	1.42286e-06	1.06593e-06	4.77227e-05	1.36098e-06		4.02809e-07	5.78821e-07	1.77271e-06	8.67549e-06	2.89051e-06	6.96713e-07	4.88872e-07	0.000171527	9.59717e-07	1.16264e-06						1.06105	1.25741	0.725433	0.836939		0.994152	0.959469	1.2925	1.17934	0.946535		1.08025	1.01448	1.09803	0.989831	1.11475	0.838694	0.903196	0.962032	1.07674	0.895236
	3.31392e-07	7.1788e-07	9.14858e-05	2.81006e-07	0.000256069	2.97418e-06	1.44471e-06	1.05571e-06	4.20729e-05	1.30329e-06		5.26088e-07	4.48963e-07	1.77197e-06	7.90138e-06	2.36259e-06	9.23377e-07	5.3296e-07	0.000172919	9.28023e-07	1.07016e-06						0.856124	1.05073	1.18122	0.773359		1.02885	0.974204	1.28011	1.03972	1.01896		0.94421	1.23301	1.09757	0.90151	0.911151	1.11155	0.766393	0.969836	1.04118	1.12844
	2.75637e-07	7.79844e-07	8.10978e-05	4.08301e-07	0.000280226	2.76166e-06	1.26859e-06	7.62113e-07	4.20273e-05	1.40301e-06		4.30224e-07	6.19265e-07	1.67841e-06	7.96153e-06	2.41895e-06	1.06593e-06	4.85972e-07	0.000164012	9.35815e-07	1.34894e-06						0.716292	0.801604	1.04032	1.12369		0.955331	0.855441	0.924106	1.0386	1.03981		0.909834	1.33122	1.03962	0.908372	0.932886	1.28316	0.935361	0.919883	1.04993	0.915488
	3.05659e-07	5.99882e-07	0.000124666	4.16305e-07	0.00029035	2.59787e-06	1.23906e-06	1.08697e-06	4.17735e-05	1.43172e-06		3.76045e-07	5.73043e-07	1.48865e-06	7.9092e-06	2.24709e-06	1.05571e-06	5.02781e-07	0.000167043	9.16996e-07	1.09437e-06						0.723664	1.01468	0.972704	1.14572		0.89867	0.835532	1.31801	1.03232	0.967715		0.864643	1.2545	0.922084	0.902401	0.866608	1.27086	0.876499	0.936883	1.02881	0.968887
	2.11309e-07	4.5765e-07	8.10117e-05	2.87138e-07	0.000285004	2.81628e-06	1.24095e-06	1.0326e-06	4.17291e-05	1.33245e-06		3.62355e-07	5.27549e-07	1.59018e-06	8.65092e-06	2.42282e-06	7.62113e-07	4.26628e-07	0.00016549	1.04139e-06	1.15821e-06						0.794693	1.04326	0.879917	0.790235		0.974223	0.836805	1.25209	1.03123	1.19169		1.12183	0.94451	0.984972	0.987028	0.934379	0.917422	1.17068	0.928174	1.16838	1.03542
	5.10065e-07	5.79301e-07	4.41109e-05	4.8434e-07	0.000246533	2.74591e-06	1.44724e-06	6.75966e-07	4.93193e-05	1.64085e-06		3.44357e-07	6.41189e-07	1.77604e-06	7.94358e-06	2.35422e-06	1.08697e-06	5.20687e-07	0.000159767	9.72269e-07	1.23774e-06
	4.11553e-07	7.17859e-07	7.18253e-05									4.46785e-07	6.92262e-07			1.95629e-06	1.0326e-06	6.53748e-07	0.000166354	8.22096e-07	1.33199e-06						0.830364	1.03354	0.959918	0.933988		0.970244	0.89229	1.21337	1.06424	1.03294		0.984152	1.15554	1.02846	0.937828	0.951955	1.08434	0.930426	0.943362	1.07301	0.988695
	3.44334e-07	6.33886e-07	6.32578e-05									2.72263e-07	6.52362e-07				6.75966e-07	4.8792e-07			1.25384e-06
	3.47878e-07	6.02507e-07	0.000117542										4.91164e-07					6.51682e-07			1.26079e-06
	3.82022e-07	5.95614e-07	5.91465e-05
			7.72254e-05
			9.77577e-05
			8.32572e-05
			6.87634e-05
			5.35045e-05

## Sheet: CCK
	201208-1-3	201209-1-4	201210-1-4	201217-1-1	210104-1-1	210111-1-3	210114-1-4	210118-2-3	210106-1	210107-1																	3.98415e-07	5.88335e-07	7.31981e-05	3.50211e-07	0.000273053	9.12423e-07	0.000109212	8.21224e-07	2.6775e-06	3.90816e-07
	5.2293e-07	6.38077e-07	8.10978e-05	3.9684e-07	0.000244214	6.96713e-07	0.000119985	6.90157e-07	2.99563e-06	2.29962e-07																	1.31253	1.08455	1.10792	1.13314	0.894383	0.763585	1.09864	0.840401	1.11881	0.588415
	3.37147e-07	5.99766e-07	8.10117e-05	3.12795e-07	0.000307937	9.23377e-07	0.000100858	8.4047e-07	2.51446e-06	5.39773e-07																	0.846221	1.01943	1.10675	0.893161	1.12776	1.01201	0.923512	1.02344	0.939107	1.38114
	3.31392e-07	5.99882e-07	7.18253e-05	4.07459e-07	0.00027409	1.06593e-06	9.39294e-05	8.7118e-07	2.62163e-06	3.02611e-07																	0.831776	1.01963	0.981245	1.16347	1.0038	1.16824	0.860067	1.06083	0.979132	0.774305
	5.10065e-07	4.5765e-07	6.32578e-05	4.04043e-07	0.000256069	1.05571e-06	9.71296e-05	8.3039e-07	2.3666e-06	3.91843e-07																	1.28023	0.777873	0.8642	1.15371	0.937799	1.15704	0.88937	1.01116	0.883883	1.00263
	4.11553e-07	5.79301e-07	5.91465e-05	3.04108e-07	0.000280226	7.62113e-07	0.000104066	8.62488e-07	2.76166e-06	6.07117e-07																	1.03298	0.984644	0.808033	0.868357	1.02627	0.835262	0.952887	1.05025	1.03143	1.55346
	3.44334e-07	6.33886e-07	7.72254e-05	2.81006e-07	0.00029035	1.08697e-06	0.000123341	6.80593e-07	2.59787e-06	3.32964e-07																	0.864259	1.07742	1.05502	0.80239	1.06335	1.1913	1.12937	0.828755	0.970257	0.851971
	3.47878e-07	6.02507e-07	8.32572e-05	4.08301e-07	0.000285004	1.0326e-06	0.000117177	7.90962e-07	2.81628e-06	3.0278e-07																	0.873154	1.02409	1.13742	1.16587	1.04377	1.13172	1.07293	0.96315	1.05183	0.774737
	3.82022e-07	5.95614e-07	6.87634e-05	2.87138e-07	0.000246533	6.75966e-07	0.000117208	1.00355e-06	2.74591e-06	4.19479e-07																	0.958855	1.01237	0.939414	0.819899	0.902877	0.740847	1.07322	1.22202	1.02555	1.07334
																											1.0019	0.97528	0.960818	0.962046	0.994812	1.01123	1.02356	1.01507	0.99259	1.05123
																											0	0	0
	8.22067e-07	7.23164e-07	8.53987e-05	4.27701e-07	0.000495423	7.33489e-07	0.000149058	1.25694e-06	3.50292e-06	6.06362e-07			1.55153	6.06362e-07	6.06362e-07					8.22067e-07	8.22067e-07	2.06334				2.06334	2.06334	1.22917	1.16668	1.22127	1.81438	0.803891	1.36486	1.53057	1.30828	1.55153
	7.71197e-07	7.03801e-07	8.56983e-05	4.08942e-07	0.00046686	1.12374e-06	0.000104279	1.22256e-06	3.23886e-06	6.25304e-07			1.59999	6.25304e-07	6.25304e-07					7.71197e-07	7.71197e-07	1.93566				1.93566	1.93566	1.19626	1.17077	1.1677	1.70978	1.2316	0.954836	1.4887	1.20966	1.59999
	6.99951e-07	9.15309e-07	9.98668e-05	3.3239e-07	0.000435276	8.32038e-07	0.00010006	1.3042e-06	2.83757e-06	5.20415e-07			1.33161	5.20415e-07	5.20415e-07					6.99951e-07	6.99951e-07	1.75684				1.75684	1.75684	1.55576	1.36434	0.949114	1.59411	0.9119	0.916202	1.58812	1.05978	1.33161
	7.01664e-07	7.07964e-07	8.48282e-05	4.81152e-07	0.000515039	1.03163e-06	9.93897e-05	1.12069e-06	3.09778e-06	5.15114e-07			1.31805	5.15114e-07	5.15114e-07					7.01664e-07	7.01664e-07	1.76114				1.76114	1.76114	1.20333	1.15888	1.37389	1.88623	1.13065	0.910065	1.36465	1.15696	1.31805
	7.7131e-07	6.07159e-07	0.000110968	3.21738e-07	0.000474646	7.09622e-07	0.000106723	1.16377e-06	2.95754e-06	5.21417e-07			1.33417	5.21417e-07	5.21417e-07					7.7131e-07	7.7131e-07	1.93594				1.93594	1.93594	1.03199	1.51599	0.918697	1.73829	0.777734	0.977214	1.41712	1.10459	1.33417
	5.44242e-07	7.23296e-07	9.22388e-05	4.27733e-07	0.000413376	1.0563e-06	0.000117722	1.1307e-06	2.81868e-06	7.63599e-07			1.95386	7.63599e-07	7.63599e-07					5.44242e-07	5.44242e-07	1.36602				1.36602	1.36602	1.22939	1.26013	1.22136	1.5139	1.15769	1.07793	1.37685	1.05273	1.95386
	5.91612e-07	6.27673e-07	7.77759e-05	4.38709e-07	0.000433321	1.40211e-06	9.93878e-05	1.42318e-06	2.80696e-06	6.08467e-07			1.55691	6.08467e-07	6.08467e-07					5.91612e-07	5.19183e-07	1.30312				1.48491	1.48491	1.06686	1.06254	1.2527	1.58695	1.53669	0.910048	1.733	1.04835	1.55691
	5.19183e-07	7.31977e-07	8.08354e-05	4.28559e-07	0.00046392	8.4114e-07	0.000138801	1.25318e-06	2.9838e-06	8.15283e-07			2.0861	8.15283e-07	8.15283e-07					5.19183e-07	6.42474e-07	1.61257				1.30312	1.30312	1.24415	1.10434	1.22372	1.69901	0.921874	1.27094	1.52599	1.1144	2.0861
	6.42474e-07	6.26342e-07	8.38607e-05	3.40564e-07	0.000471991	1.74045e-06	0.000137028	1.11588e-06	2.61522e-06	4.95881e-07			1.26884	4.95881e-07	4.95881e-07					6.42474e-07	4.27113e-07	1.07203				1.61257	1.61257	1.0646	1.14567	0.972453	1.72857	1.90751	1.2547	1.3588	0.976738	1.26884
	4.27113e-07	7.82586e-07	0.000103823	3.25152e-07	0.000557336	1.25457e-06	0.00013664	1.34289e-06	2.62704e-06	5.62827e-07			1.44013	5.62827e-07	5.62827e-07					4.27113e-07	8.0415e-07	2.01837				1.07203	1.07203	1.33017	1.41839	0.928446	2.04113	1.37499	1.25115	1.63524	0.981151	1.44013
	8.0415e-07	7.48159e-07	0.000116548	4.36114e-07	0.000505854	7.75716e-07	0.000127964	9.91055e-07	2.75834e-06	4.76056e-07			1.21811	4.76056e-07	4.76056e-07					8.0415e-07	8.0415e-07	2.01837				2.01837	2.01837	1.27165	1.59222	1.24529	1.85259	0.850171	1.17171	1.2068	1.03019	1.21811
	6.75274e-07	8.42743e-07	0.000101095	2.96517e-07	0.000478566	1.65621e-06	0.000133392	1.19182e-06	2.83365e-06	3.29157e-07			0.842231	3.29157e-07	3.29157e-07					6.75274e-07	6.75274e-07	1.6949				1.6949	1.6949	1.43242	1.38111	0.846681	1.75265	1.81517	1.22141	1.45128	1.05832	0.842231
	6.99463e-07	7.85437e-07	7.81271e-05	3.98319e-07	0.000574557	8.1188e-07	0.0001198	1.13772e-06	2.90881e-06	6.33096e-07			1.61993	6.33096e-07	6.33096e-07					6.99463e-07	6.99463e-07	1.75561				1.75561	1.75561	1.33502	1.06734	1.13737	2.1042	0.889807	1.09695	1.3854	1.08639	1.61993
	8.22918e-07	7.42953e-07	8.96761e-05	3.86471e-07	0.000418395	7.94463e-07	0.000107199	1.11659e-06	2.68341e-06	9.55213e-07			2.44415	9.55213e-07	9.55213e-07					8.22918e-07	8.22918e-07	2.06548				2.06548	2.06548	1.2628	1.22511	1.10354	1.53229	0.870717	0.981569	1.35967	1.00221	2.44415
	9.75691e-07	5.97224e-07	9.46974e-05	4.90972e-07	0.000501478	8.57197e-07	0.000110197	1.08526e-06	2.78249e-06	5.33506e-07			1.36511	5.33506e-07	5.33506e-07					9.75691e-07	9.75691e-07	2.44893				2.44893	2.44893	1.01511	1.29371	1.40193	1.83656	0.939473	1.00902	1.32152	1.03921	1.36511
	4.28627e-07	6.14524e-07	9.91117e-05	5.78786e-07	0.000480305	1.09972e-06	0.000123597	1.23342e-06	2.6868e-06	6.81182e-07			1.74297	6.81182e-07	6.81182e-07					4.28627e-07	7.94877e-07	1.9951				1.07583	1.07583	1.04451	1.35402	1.65268	1.75902	1.20527	1.13172	1.50193	1.00347	1.74297
	8.92618e-07	7.30368e-07	7.69594e-05	4.40477e-07	0.000443584	1.23944e-06	0.000120754	1.05553e-06	3.09019e-06	6.84544e-07			1.75158	6.84544e-07	6.84544e-07					8.92618e-07	7.35425e-07	1.84587				2.24042	2.24042	1.24141	1.05138	1.25775	1.62454	1.35841	1.10569	1.28531	1.15413	1.75158
	9.66495e-07	8.26477e-07	9.74745e-05	3.24153e-07	0.000431189	7.1881e-07	0.00014768	1.39299e-06	2.82297e-06	4.02637e-07			1.03025	4.02637e-07	4.02637e-07					9.66495e-07	6.66612e-07	1.67316				2.42585	2.42585	1.40477	1.33165	0.925593	1.57914	0.787803	1.35223	1.69624	1.05433	1.03025
	6.63349e-07	6.28959e-07	8.92168e-05	4.47232e-07	0.000494362	9.73052e-07	0.000102826	1.02583e-06	2.69837e-06	8.5307e-07			2.18279	8.5307e-07	8.5307e-07					6.63349e-07	6.00969e-07	1.5084				1.66497	1.66497	1.06905	1.21884	1.27704	1.8105	1.06645	0.941533	1.24915	1.00779	2.18279
	7.94877e-07	7.10491e-07	0.000102338	3.85866e-07	0.000485162	1.20289e-06	0.000164708	1.22749e-06	2.84424e-06	5.89716e-07			1.50894	5.89716e-07	5.89716e-07					7.94877e-07	7.92999e-07	1.99038				1.9951	1.9951	1.20763	1.3981	1.10181	1.77681	1.31835	1.50815	1.49471	1.06227	1.50894
	7.35425e-07	7.26835e-07	8.74583e-05	4.14693e-07	0.000504345	1.5417e-06	0.00013599	1.1844e-06	2.97216e-06	6.65765e-07			1.70352	6.65765e-07	6.65765e-07					7.35425e-07	7.71121e-07	1.93547				1.84587	1.84587	1.23541	1.19482	1.18412	1.84706	1.68967	1.2452	1.44224	1.11005	1.70352
	6.66612e-07	6.53585e-07	0.000103522	3.53413e-07	0.000524947	1.34401e-06	0.000146898	1.20731e-06	2.69713e-06	7.98895e-07			2.04417	7.98895e-07	7.98895e-07					6.66612e-07	6.66019e-07	1.67167				1.67316	1.67316	1.1109	1.41427	1.00914	1.92251	1.47301	1.34508	1.47014	1.00733	2.04417
	6.00969e-07	7.52157e-07	0.000104165	4.90003e-07	0.000555242	1.61295e-06	0.000158831	1.23067e-06	2.94956e-06	3.73184e-07			0.954883	3.73184e-07	3.73184e-07					6.00969e-07	5.95814e-07	1.49546				1.41773	1.5084	1.27845	1.42305	1.39916	2.03346	1.76776	1.45434	1.49858	1.10161	0.954883
	7.92999e-07	6.39599e-07	9.60887e-05	5.20291e-07	0.000465216	1.35666e-06	0.000139069	1.0483e-06	2.82935e-06	7.27803e-07			1.86226	7.27803e-07	7.27803e-07					7.92999e-07	7.19483e-07	1.80586				1.5084	1.99038	1.08713	1.31272	1.48565	1.70376	1.48687	1.27339	1.27651	1.05671	1.86226
	7.71121e-07	6.16798e-07	0.000112773	5.54531e-07	0.000463042	7.17555e-07	0.000150455	1.17297e-06	2.74582e-06	7.36998e-07			1.88579	7.36998e-07	7.36998e-07					7.71121e-07	6.18289e-07	1.55187				1.99038	1.93547	1.04838	1.54066	1.58342	1.6958	0.786428	1.37765	1.42832	1.02552	1.88579
	6.66019e-07	6.92324e-07	8.42086e-05	5.18163e-07	0.000501282	8.8018e-07	0.000181848	1.03987e-06	2.84478e-06	7.88976e-07			2.01879	7.88976e-07	7.88976e-07					6.66019e-07	6.66019e-07	1.67167				1.93547	1.67167	1.17675	1.15042	1.47957	1.83584	0.964662	1.66509	1.26624	1.06248	2.01879
	9.707e-07	7.85491e-07	0.000104442	4.10349e-07	0.00049387	9.77205e-07	0.000120901	1.02447e-06	2.96102e-06	8.0498e-07			2.05974	8.0498e-07	8.0498e-07					9.707e-07	9.707e-07	2.4364				1.74378	2.4364	1.33511	1.42684	1.17172	1.8087	1.071	1.10703	1.24749	1.10589	2.05974
	6.94749e-07	7.3009e-07	9.04776e-05	4.36295e-07	0.000451743	1.68404e-06	0.000147553	1.02521e-06	2.77883e-06	6.915e-07			1.76937	6.915e-07	6.915e-07					6.94749e-07	6.94749e-07	1.74378				1.49546	1.74378	1.24094	1.23606	1.24581	1.65442	1.84568	1.35107	1.24839	1.03784	1.76937
	5.95814e-07	7.53043e-07	0.000102066	4.28127e-07	0.000560211	8.78274e-07	0.000145307	1.20236e-06	2.80491e-06	9.35181e-07			2.39289	9.35181e-07	9.35181e-07					5.95814e-07	5.95814e-07	1.49546				1.80586	1.49546	1.27996	1.39438	1.22248	2.05166	0.962572	1.33051	1.46411	1.04758	2.39289
	6.18289e-07	6.68512e-07	0.000103836	4.22482e-07	0.00055377	1.00827e-06	0.000139469	1.30889e-06	2.72813e-06	1.03974e-06			2.66044	1.03974e-06	1.03974e-06					6.18289e-07	6.18289e-07	1.55187				1.55187	1.55187	1.13628	1.41856	1.20636	2.02807	1.10505	1.27705	1.59383	1.01891	2.66044
																					0						1.77984	1.23381	1.32525	1.26519	1.87574	1.18979	1.34615	1.36401	1.05454	2.18025
																					0
																					0
																					0
																					0
																					0
