# Supplementary material for: Cholecystokinin modulates age-dependent thalamocortical neuroplasticity
Source: eLife journal article supplement (doi:10.7554/elife.101513), 2024-10-14
Supplement: data1 [file ppi_all_updated_20220901.xlsx]

## Sheet: Sheet1
Date	Block	Channel	9604	9408	9016	8232	6664
20211231PPI	1	1	-0.209091	-0.9	-1.12727	-1.09545	-1.72727	ctrl	drug toxicity
20211231PPI	1	2	0.057971	0.27619	0.143685	0.0815735	0.157764	cck4
20211231PPI	1	3	0.043041	0.228077	-0.0848753	0.16251	0.304505	ctrl
20211231PPI	2	2	-0.092233	-0.524272	0.23301	-0.946602	-0.73301	cck4
20211231PPI	2	4	0.0938093	0.32178	0.671323	0.468529	0.340576	cck4
20220107ppi	1	1	0.472364	0.424551	0.321465	0.431333	0.292642	ctrl
20220107ppi	1	2	0.029416	0.152031	0.293724	0.705403	0.516965	ctrl
20220107ppi	2	1	0.888074	0.873947	0.838087	0.791633	0.853301	CCK4
20220107ppi	2	2	-0.192225	-0.37851	-0.0431965	-0.458423	0.075054	CCK4
20220107ppi	2	4	-0.0611961	-0.699583	-0.2879	0.442281	0.00834492	CCK4
20220115ppi	1	1	-0.0921053	0.0113519	-0.161765	-0.272704	-0.146543	ctrl
20220115ppi	1	2	0.243148	-0.296557	-0.0885453	-0.0386507	-0.0513001	CCK4
20220115ppi	1	3	0.0411858	0.0405783	0.201312	0.119427	0.140202	ctrl
20220115ppi	1	4	0.132602	0.0859495	0.176948	0.35708	0.492645	CCK4
20220115ppi	2	1	0.0502524	0.0759271	0.113671	-0.333114	0.00768049	ctrl
20220115ppi	2	2	-0.652237	-0.683261	-0.422078	0.01443	0.020202	CCK4
20220115ppi	2	3	0.00917927	0.0314525	0.0465713	-0.205319	0.154833	ctrl
20220115ppi	2	4	-0.0941456	-0.0458861	0.150712	0.14913	-0.165348	CCK4
20220127PPI	1	1	0.278603	0.170792	0.259901	0.340209	0.294279	CCK4
20220127PPI	1	2	0.294797	0.144009	0.0480029	0.0641261	0.151154	CCK4
20220127PPI	1	3	0.0384334	-0.144217	0.174231	0.156662	0.299414	CCK4
20220127PPI	1	4	0.0290758	0.0847055	0.0388666	0.00489542	0.019285	CCK4
20220127PPI	2	1	0.15225	0.343074	0.426067	0.373904	0.557569	Ctrl
20220127PPI	2	2	-0.119647	0.0738245	-0.0197664	-0.098832	-0.139413	Ctrl
20220127PPI	2	3	0.168265	-0.0203429	-0.162162	-0.121476	0.359779	Ctrl
20220127PPI	2	4	-0.06	-0.0534454	-0.00722689	0.0737815	-0.0571429	Ctrl
20220127PPI	3	1	0.0384025	0.0990085	0.215752	0.305125	0.350091	CCK4
20220127PPI	3	2	0.13414	0.164516	0.227151	0.446505	0.467473	CCK4
20220127PPI	3	4	0.0370856	0.0609357	0.163937	0.180448	0.213996	CCK4
20220213ppi	1	1	0.171706	0.191956	0.344799	0.363107	0.337032	CCK4
20220213ppi	1	2	-0.197231	0.115145	0.23004	0.246133	0.489895	CCK4
20220213ppi	1	3	0.345289	0.467878	0.356434	0.433883	0.436786	Ctrl
20220213ppi	1	4	0.0555501	0.105693	0.210795	0.332219	0.468784	Ctrl
20220213ppi	2	1	0.0267966	0.153877	-0.0296387	0.0503451	-0.413723	CCK4
20220213ppi	2	2	0.035514	-0.161682	0.269159	-0.243925	-0.713084	CCK4
20220213ppi	2	3	-0.112836	0.0217391	0.132505	0.0113872	0.0652174	Ctrl
20220213ppi	2	4	-0.0800096	-0.158818	0.184046	-0.0135752	0.090221	Ctrl
20220213ppi	3	1	-0.0616328	-0.108745	0.0106486	-0.0584059	0.148758	CCK4
20220213ppi	3	2	-0.187297	0.0466765	0.17873	0.220236	0.20384	CCK4
20220213ppi	4	1	-0.241886	0.049602	-0.00979792	-0.0587875	-0.278628	CCK4
20220213ppi	4	2	0.0828221	-0.0217513	0.101227	-0.0978806	-0.275237	CCK4
20220213ppi	4	3	0.125681	0.134707	0.11904	0.477691	0.480075	Ctrl
20220213ppi	4	4	0.0453773	0.17777	0.0545547	0.0576139	0.104521	Ctrl
20220228ppi	1	1	0.0129103	-0.134185	0.0123609	-0.129653	-0.128142	ctrl
20220228ppi	1	2	0.284209	0.233824	0.322032	0.488045	0.497231	CCK4
20220228ppi	1	3	0.186005	0.238129	0.277758	0.398429	0.200643	ctrl
20220228ppi	1	4	0.0115494	0.167242	0.179091	-0.0611969	-0.19919	CCK4
20220228ppi	2	1	0.193197	0.119788	0.0441527	0.0803194	0.202027	ctrl
20220228ppi	2	2	0.187738	0.356025	0.18351	0.239746	0.396195	CCK4
20220228ppi	2	3	-0.23753	0.0187648	0.231354	-0.13658	-0.22019	ctrl
20220228ppi	2	4	0.253725	0.0326192	0.0500749	0.200388	0.00687649	CCK4
20220228ppi	3	1	-0.0205015	0.168428	0.110866	-0.0105662	-0.0391106	ctrl
20220228ppi	3	2	0.0452573	0.13044	0.172102	0.223807	0.190081	CCK4
20220228ppi	3	3	-0.110654	-0.19634	-0.0286565	-0.156334	0.0425592	ctrl
20220228ppi	3	4	0.134016	0.447856	0.254873	0.390351	0.388402	CCK4
20220228ppi	4	2	-0.373692	-0.355381	-0.0396114	0.122197	-0.382287	CCK4
individual testing
20220620ppi	1	1	-0.187819	0.182709	0.231474	0.371167	0.552172	ctrl
20220620ppi	1	2	0.205792	0.371721	0.513118	0.499489	0.355026	ctrl					-0.187819	0.182709	0.231474	0.371167	0.552172			0.0412541	0.467547	0.508801	0.485699	0.636414
20220620ppi	2	1	0.0412541	0.467547	0.508801	0.485699	0.636414	CCK4					0.205792	0.371721	0.513118	0.499489	0.355026			0.35192	0.697898	0.619744	0.609232	0.66042
20220620ppi	2	2	0.35192	0.697898	0.619744	0.609232	0.66042	CCK4					0.0968523	0.407789	0.269572	0.461663	0.602906			0.214728	0.517696	0.670687	0.767497	0.74877
20220620ppi	3	1	0.214728	0.517696	0.670687	0.767497	0.74877	CCK4					0.265925	0.367723	0.47516	0.458244	0.632582			0.2902	0.450727	0.536632	0.697975	0.716732
20220620ppi	3	2	0.2902	0.450727	0.536632	0.697975	0.716732	CCK4					-0.0829728	0.0726205	-0.0645859	0.0360012	0.0834363			0.176471	0.216008	0.0646095	0.10704	0.0443587
20220620ppi	4	1	0.0968523	0.407789	0.269572	0.461663	0.602906	ctrl					0.224219	0.132072	0.34702	0.516178	0.471334			0.323227	0.434079	0.507203	0.506242	0.623131
20220620ppi	4	2	0.265925	0.367723	0.47516	0.458244	0.632582	ctrl					-0.17876	-0.0048895	-0.0449834	0.079601	-0.0524154
20220620ppi	5	1	0.176471	0.216008	0.0646095	0.10704	0.0443587	CCK4					-0.0414721	-0.0740181	-0.0579511	-0.0887119	0.0181269			0.40513	0.309155	0.406015	0.397833	0.670942
20220620ppi	5	2	0.323227	0.434079	0.507203	0.506242	0.623131	CCK4					0.0230116	0.0660845	0.0426009	0.0721029	0.0351664
20220703ppi	1	1	-0.156593	-0.0385989	-0.0901099	-0.0708791	0.0401099	CCK4					0.204319	0.27058	0.326873	0.114803	0.573274			0.234865	0.14975	0.0888263	0.0875464	0.28299
20220703ppi	1	2	-0.0829728	0.0726205	-0.0645859	0.0360012	0.0834363	ctrl					0.263592	0.176052	0.184466	0.239482	0.419903			0.196891	0.347474	0.386334	0.550194	0.486075
20220703ppi	2	1	0.40513	0.309155	0.406015	0.397833	0.670942	CCK4					0.0742129	0.236582	0.172564	0.229235	0.271664			0.144608	0.27342	0.329248	0.316176	0.400054
20220703ppi	2	2	0.224219	0.132072	0.34702	0.516178	0.471334	CTRL												0.0578811	0.147287	0.468734	0.28062	0.428941
20220703ppi	3	1	-0.109137	0.160321	0.275381	0.155668	0.371404	CCK4					0.193197	0.119788	0.0441527	0.0803194	0.202027			0.191617	0.270493	0.400578	0.506504	0.628123
20220705ppi	1	1	-0.17876	-0.0048895	-0.0449834	0.079601	-0.0524154	CTRL					0.186005	0.238129	0.277758	0.398429	0.200643			0.187738	0.356025	0.18351	0.239746	0.396195
20220705ppi	1	2	-0.0414721	-0.0740181	-0.0579511	-0.0887119	0.0181269	CTRL					0.0555501	0.105693	0.210795	0.332219	0.468784			0.284209	0.233824	0.322032	0.488045	0.497231
20220705ppi	2	1	0.0230116	0.0660845	0.0426009	0.0721029	0.0351664	CTRL												0.171706	0.191956	0.344799	0.363107	0.337032
20220705ppi	2	2	0.234865	0.14975	0.0888263	0.0875464	0.28299	CCK4
20220901ppi	1	1	0.196891	0.347474	0.386334	0.550194	0.486075	CCK4
20220901ppi	1	2	0.144608	0.27342	0.329248	0.316176	0.400054	CCK4
20220901ppi	2	1	0.204319	0.27058	0.326873	0.114803	0.573274	CTRL
20220901ppi	2	2	0.263592	0.176052	0.184466	0.239482	0.419903	CTRL
20220901ppi	3	1	0.0578811	0.147287	0.468734	0.28062	0.428941	CCK4
20220901ppi	3	2	0.191617	0.270493	0.400578	0.506504	0.628123	CCK4					0.0867768	0.177909	0.195202	0.253348	0.322309			0.218163	0.337556	0.389183	0.426897	0.503827
20220901ppi	3	4	-0.170316	-0.081721	-0.0318228	-0.192464	-0.00967413	CCK4
20220901ppi	4	1	0.0742129	0.236582	0.172564	0.229235	0.271664	CTRL
20220901ppi	4	2	-0.0683761	0.503722	0.618969	0.671629	0.599669	CTRL
