# Supplementary material for: Cholecystokinin modulates age-dependent thalamocortical neuroplasticity
Source: eLife journal article supplement (doi:10.7554/elife.101513), 2024-10-14
Supplement: data1 [file thalamic-cortical Aud.xlsx]

## Sheet: Sheet1
20211112-3-1	20211112-3-2	20211112-4-1	20211112-4-2	20211112-4-3	20211112-4-4	20211122-2-1	20211122-2-2	20211122-2-3	20211122-2-4	20211123-2-1	20211123-2-2	20211123-2-3	20211123-2-4	20211124-2-1	20211124-2-2	20211124-2-3	20211124-2-4	20211126-2-1	20211126-2-2	20211126-2-3	20211126-2-4	20211130-1	20211130-2	20211130-3	20211130-4	5.80126e-08	5.15566e-08	7.23561e-08	6.5782e-08	6.85328e-08	1.6914e-07	3.07449e-06	1.85613e-06	8.65837e-07	5.18578e-07	1.74907e-05	1.93159e-05	1.96131e-05	2.28278e-05	1.81982e-07	1.25968e-07	1.15693e-07	1.81141e-07	8.98639e-08	1.17903e-07	1.02042e-07	1.14699e-07	2.27015e-07	2.2535e-07
4.63413e-08	5.14219e-08	4.99472e-08	4.1814e-08	8.68331e-08	1.83055e-07	3.53289e-06	1.9485e-06	9.46921e-07	5.83733e-07	1.8765e-05	2.24101e-05	2.54235e-05	1.92954e-05	1.69732e-07	1.27853e-07	1.12389e-07	2.06088e-07	7.73791e-08	1.13666e-07	1.12748e-07	9.50351e-08	2.31777e-07	2.17839e-07	1.42015e-07	3.62362e-07	0.798814	0.997388	0.690296	0.635645	1.26703	1.08227	1.1491	1.04977	1.09365	1.12564	1.07286	1.16019	1.29625	0.845261	0.932684	1.01496	0.971441	1.13772	0.861071	0.964065	1.10493	0.828559	1.02098	0.966669
7.52716e-08	3.60546e-08	9.04913e-08	5.56288e-08	3.1514e-08	1.15984e-07	3.01111e-06	1.80396e-06	8.17061e-07	4.72213e-07	2.15701e-05	2.15318e-05	1.76679e-05	2.81276e-05	1.81286e-07	1.23398e-07	9.82127e-08	1.69425e-07	9.3627e-08	1.03827e-07	1.02408e-07	1.28562e-07	2.28363e-07	3.0058e-07	1.70297e-07	3.64498e-07	1.2975	0.699322	1.25064	0.845654	0.459838	0.685728	0.979385	0.971898	0.943666	0.910593	1.23323	1.11472	0.90082	1.23216	0.996175	0.979598	0.848907	0.935325	1.04188	0.880618	1.00359	1.12086	1.00594	1.33384
6.75327e-08	3.151e-08	7.23958e-08	6.957e-08	3.8041e-08	1.97072e-07	2.59823e-06	1.62283e-06	7.52469e-07	5.54616e-07	1.70104e-05	1.92826e-05	1.29087e-05	2.82141e-05	1.6667e-07	1.20868e-07	1.28265e-07	2.19656e-07	1.0984e-07	1.20979e-07	1.06962e-07	1.3123e-07	2.35017e-07	2.91897e-07	1.36704e-07	4.11839e-07	1.1641	0.611174	1.00055	1.05758	0.555077	1.16514	0.845092	0.87431	0.869065	1.0695	0.972537	0.998274	0.658166	1.23595	0.915862	0.959512	1.10866	1.21262	1.22229	1.02609	1.04822	1.14412	1.03525	1.29531
5.57927e-08	5.88004e-08	5.94978e-08	8.00908e-08	7.88414e-08	1.83694e-07	2.66689e-06	1.63115e-06	8.03604e-07	4.9046e-07	1.32915e-05	1.59767e-05	2.91407e-05	2.24605e-05	1.77651e-07	1.14171e-07	1.04597e-07	1.28144e-07	7.50811e-08	1.19837e-07	8.86548e-08	1.26556e-07	2.12047e-07	2.202e-07	1.42117e-07	2.62245e-07	0.961734	1.1405	0.822291	1.21752	1.15042	1.08605	0.867423	0.878795	0.928124	0.945779	0.759916	0.827125	1.48578	0.983911	0.9762	0.906349	0.904093	0.707429	0.835498	1.0164	0.868811	1.10337	0.934066	0.977146
4.78103e-08	6.35832e-08	9.36449e-08	8.50359e-08	6.77396e-08	1.582e-07	3.17137e-06	1.99764e-06	8.7308e-07	5.18738e-07	1.41749e-05	1.94377e-05	1.7333e-05	2.11432e-05	1.84557e-07	1.65263e-07	1.16799e-07	1.44142e-07	9.52836e-08	1.22714e-07	1.15787e-07	9.43547e-08	2.36298e-07	1.71465e-07	1.19541e-07	3.53291e-07	0.824137	1.23327	1.29422	1.29269	0.988426	0.93532	1.03151	1.07624	1.00837	1.00031	0.810423	1.0063	0.883743	0.926206	1.01415	1.31194	1.00956	0.795745	1.06031	1.04081	1.13471	0.822627	1.04089	0.760885
6.69054e-08	6.49688e-08	8.50605e-08	6.32496e-08	7.53144e-08	2.11244e-07	3.32469e-06	1.96269e-06	9.75473e-07	5.16546e-07	1.97452e-05	1.86221e-05	1.70238e-05	2.04431e-05	1.94254e-07	9.34683e-08	1.04984e-07	2.13364e-07	7.2229e-08	1.19098e-07	7.87966e-08	9.61059e-08	1.96151e-07	1.87685e-07	2.04335e-07	4.88146e-07	1.15329	1.26015	1.17558	0.961504	1.09895	1.24893	1.08138	1.05741	1.12662	0.996082	1.1289	0.964081	0.86798	0.895534	1.06743	0.741998	0.907432	1.17789	0.80376	1.01014	0.772201	0.837894	0.864043	0.832862
4.54766e-08	5.13783e-08	4.29884e-08	6.05828e-08	8.87558e-08	1.98709e-07	3.23472e-06	1.97165e-06	9.49003e-07	5.23494e-07	1.68291e-05	2.37017e-05	2.41175e-05	2.42327e-05	1.9033e-07	1.1915e-07	1.22083e-07	2.10219e-07	9.45556e-08	1.13477e-07	1.02841e-07	1.27696e-07	2.19374e-07	2.02726e-07	1.31314e-07	2.85112e-07	0.783908	0.996542	0.594123	0.920964	1.29508	1.17482	1.05211	1.06224	1.09605	1.00948	0.962169	1.22705	1.22966	1.06154	1.04587	0.945871	1.05523	1.16053	1.05221	0.962461	1.00783	1.11331	0.966341	0.899608
5.89702e-08	5.47352e-08	8.48231e-08	7.02839e-08	8.12233e-08	1.05163e-07	3.05604e-06	1.91057e-06	8.09086e-07	4.88821e-07	1.85397e-05	1.35648e-05	1.329e-05	1.87057e-05	1.91377e-07	1.43576e-07	1.38215e-07	1.58087e-07	1.00916e-07	1.29624e-07	1.08134e-07	1.18054e-07	2.57092e-07	2.10406e-07	1.46806e-07	3.64795e-07	1.01651	1.06165	1.1723	1.06844	1.18517	0.621751	0.993998	1.02933	0.934456	0.942618	1.05997	0.70226	0.677605	0.819428	1.05163	1.13977	1.19467	0.872733	1.12298	1.09941	1.05971	1.02925	1.13249	0.933687
																										0	0	0	0	0	0	0	0	0	0	0	0	0	0	0	0	0	0	0	0	0	0	0	0
																										0	0	0	0	0	0	0	0	0	0	0	0	0	0	0	0	0	0	0	0	0	0	0	0
																										0	0	0	0	0	0	0	0	0	0	0	0	0	0	0	0	0	0	0	0	0	0	0	0
5.79512e-08	4.32883e-08	4.35518e-08	9.02292e-08	1.27843e-07	2.15688e-07	3.70644e-06	2.30197e-06	1.22406e-06	7.4776e-07	3.70904e-05	3.89675e-05	3.80465e-05	4.46491e-05	1.33833e-07	9.7689e-08	1.65572e-07	2.57712e-07	7.28178e-08	1.98199e-07	1.21917e-07	1.30792e-07	2.43857e-07	2.7709e-07	1.09921e-07	4.35984e-07	0.998942	0.839628	0.601909	1.37164	1.86543	1.2752	1.20554	1.2402	1.41373	1.44194	2.12057	2.01738	1.93985	1.95591		1.14085	1.43113	1.42272	0.810312	1.68104	1.19478	1.1403	1.07419	1.2296
8.19496e-08	4.07872e-08	1.15549e-07	1.26436e-07	5.26645e-08	2.01582e-07	3.85092e-06	2.11317e-06	8.83612e-07	7.24016e-07	1.43636e-05	1.39095e-05	1.86465e-05	2.32489e-05	2.37294e-07	1.43712e-07	1.91601e-07	2.64582e-07	9.59526e-08	2.29648e-07	1.85457e-07	1.31438e-07	3.0476e-07	3.72922e-07	2.15842e-07	5.45816e-07			1.59696	1.92205	0.768457	1.19181	1.25254	1.13848	1.02053	1.39616	0.821212	0.720103	0.950717	1.01845	2.28878		1.65612		1.06776	1.94778	1.81747	1.14594	1.34247	1.65486
7.52389e-08	3.89892e-08	8.18545e-08	8.34898e-08	7.12498e-08	2.25426e-07	3.95517e-06	2.29707e-06	1.03059e-06	6.0305e-07	1.42557e-05	1.4325e-05	2.64271e-05	2.26906e-05	2.74501e-07	2.38697e-07	2.57598e-07	1.64677e-07	8.77053e-08	1.21764e-07	1.01623e-07	9.98791e-08	2.80609e-07	2.45362e-07	2.18599e-07	3.81886e-07	1.41262		1.13127	1.26919	1.03965	1.33278	1.28645	1.23756	1.19029	1.16289	0.815043	0.741617	1.34742	0.99399	1.94139	1.89489	2.22656	1.46065	0.97598	1.03275	0.995902	0.870791	1.23608	1.0888
9.41818e-08	9.59478e-08	1.74423e-07	8.20671e-08	6.79233e-08	2.37285e-07	4.43197e-06	2.33018e-06	1.09932e-06	5.42108e-07	1.59416e-05	2.47758e-05	1.94695e-05	2.66704e-05	6.36167e-08	1.82422e-07	1.1234e-07	2.03936e-07	1.28778e-07	1.35139e-07	1.76668e-07	1.73463e-07	2.51955e-07	2.69203e-07	1.8684e-07	3.61915e-07	1.29694		2.41062	1.24756	0.991107	1.40289	1.44153	1.2554	1.26966	1.04537	0.911433	1.28266	0.992677	1.16833	1.53947	1.44816	0.971016	1.12585	1.43304	1.14619	1.73133	1.51233	1.10986	1.1946
3.96028e-08	6.23222e-08	1.11479e-07	1.38898e-07	8.2267e-08	2.69727e-07	4.21049e-06	2.55559e-06	1.15536e-06	4.97894e-07	2.5209e-05	2.21376e-05	2.1354e-05	3.79293e-05	2.08633e-07	1.62148e-07	1.74707e-07	2.89566e-07	1.20015e-07	9.4755e-08	1.63161e-07	1.38979e-07	3.76745e-07	3.6609e-07	1.69053e-07	4.08367e-07		0.791116	1.54069	2.1115	1.2004	1.59469	1.36949	1.37684	1.33439	0.960114	1.44128	1.14608	1.08876	1.66154	1.60934	1.28721	1.51009	1.59857	1.33552	0.803671	1.59896	1.21169	1.65956	1.62454
1.09698e-07	6.57419e-08	7.22735e-08	1.00939e-07	7.20452e-08	1.73692e-07	3.97162e-06	2.48328e-06	1.06331e-06	5.16942e-07	1.85268e-05	2.21184e-05	2.80937e-05	2.35401e-05	1.33676e-07	2.09613e-07	1.64522e-07	2.46999e-07	8.86355e-08	1.59833e-07	1.08183e-07	1.75412e-07	2.47059e-07	2.73993e-07	1.77111e-07	3.8696e-07	1.62347		0.998857	1.53445	1.05125	1.02691	1.2918	1.33789	1.22807	0.996847	1.05923	1.14508	1.43239	1.0312	1.34485	1.66401	1.42205	1.36358	0.986331	1.35563	1.06019	1.52932	1.08829	1.21586
4.11146e-08	3.26704e-08	5.72968e-08	1.18952e-07	7.79307e-08	2.16269e-07	4.10608e-06	2.26461e-06	1.1075e-06	6.52621e-07	2.11491e-05	2.82727e-05	2.11155e-05	2.9822e-05	1.56128e-07	1.16683e-07	2.64416e-07	1.89631e-07	1.39781e-07	1.42057e-07	2.0464e-07	1.70699e-07	3.55228e-07	2.27847e-07	2.70962e-07	5.15196e-07		0.756241	0.791872	1.80828	1.13713	1.27864	1.33553	1.22007	1.27911	1.25848	1.20916	1.4637	1.0766	1.30639	1.81761		2.2855	1.04687	1.55548	1.20487	2.00546	1.48823	1.56478	1.01108
1.06533e-07	8.11365e-08	1.21112e-07	8.8663e-08	9.87629e-08	1.65768e-07	3.51972e-06	2.18729e-06	1.01524e-06	5.18541e-07	2.45478e-05	2.07059e-05	3.22917e-05	3.32729e-05	1.79818e-07	9.87607e-08	1.25363e-07	2.83744e-07	8.88319e-08	1.61574e-07	1.02312e-07	1.81474e-07	3.77448e-07	3.34648e-07	1.21858e-07	4.61009e-07			1.67383	1.34783	1.4411	0.980061	1.14481	1.17842	1.17256	0.99993	1.40347	1.07196	1.64643	1.45756	2.0905			1.56643	0.988517	1.3704	1.00265	1.58217	1.66266	1.48502
5.47351e-08	7.3462e-08	6.76847e-08	1.02444e-07	5.11227e-08	1.9939e-07	4.14968e-06	2.29262e-06	1.0756e-06	5.45693e-07	2.11861e-05	3.06349e-05	3.78133e-05	2.71045e-05	1.65877e-07	2.54745e-07	9.94728e-08	2.16705e-07	9.90931e-08	1.84879e-07	1.4703e-07	1.65521e-07	2.78174e-07	3.684e-07	3.23422e-07	4.90905e-07			0.935439	1.55733	0.745959	1.17885	1.34971	1.23516	1.24226	1.05229	1.21128	1.58599	1.92796	1.18735	1.19701	2.02229	2.21263	1.19634	1.1027	1.56807	1.44089	1.44308	1.22536	1.63479
8.67776e-08	7.08687e-08	4.92682e-08	7.32235e-08	9.72011e-08	1.83988e-07	3.38374e-06	1.90279e-06	1.09416e-06	4.83446e-07	3.21711e-05	3.6252e-05	2.16238e-05	4.41579e-05	2.55077e-07	1.034e-07	2.55985e-07	2.85826e-07	1.05152e-07	2.17685e-07	1.48902e-07	1.48438e-07	3.36615e-07	2.52156e-07	1.67823e-07	3.5312e-07			0.680913	1.11312	1.41831	1.08778	1.10059	1.02514	1.2637	0.932253	1.83932	1.87679	1.10252	1.93439	1.98665	1.41533		1.57792	1.17012	1.84631	1.45923	1.29415	1.48279	1.11896
4.17476e-08	8.28113e-08	9.94414e-08	9.34733e-08	1.21449e-07	2.181e-07	3.54404e-06	2.24532e-06	9.4208e-07	4.28323e-07	3.39753e-05	2.06069e-05	3.48429e-05	4.53912e-05	1.82476e-07	1.78286e-07	1.02096e-07	2.44276e-07	9.30067e-08	1.12841e-07	1.13625e-07	1.63205e-07	2.99345e-07	3.2199e-07	1.43668e-07	4.58967e-07			1.37433	1.42096	1.77213	1.28947	1.15272	1.20968	1.08806	0.825957	1.94247	1.06684	1.77651	1.98842	1.939	2.06925		1.34854	1.03497	0.957069	1.11352	1.42289	1.31861	1.42885
1.4509e-07	3.63834e-08	4.41187e-08	8.65838e-08	8.4754e-08	1.83787e-07	3.6346e-06	2.06621e-06	1.06653e-06	5.08613e-07	1.90679e-05	3.29396e-05	3.38352e-05	2.7422e-05	1.98592e-07	2.60661e-07	1.54891e-07	2.46816e-07	1.01831e-07	1.94728e-07	1.59142e-07	1.06297e-07	2.65252e-07	2.92601e-07	2.94833e-07	4.53268e-07		1.86102	0.609744	1.31622	1.23669	1.0866	1.18218	1.11319	1.23179	0.980785	1.09017	1.70531	1.72513	1.20125	2.4989	1.44107	1.33881	1.36257	1.13317	1.6516	1.55959	0.926743	1.16844	1.29843
3.51038e-08	6.77848e-08	9.71168e-08	6.14777e-08	1.46696e-07	2.02302e-07	3.40705e-06	2.06759e-06	1.13575e-06	5.72094e-07	2.89137e-05	3.49962e-05	3.35236e-05	3.34993e-05	1.91903e-07	1.8153e-07	2.14743e-07	3.53787e-07	7.50556e-08	1.69552e-07	9.99348e-08	1.76937e-07	2.80221e-07	2.24725e-07	2.28625e-07	3.67458e-07			1.34221	0.934568	2.14052	1.19606	1.10817	1.11393	1.31173	1.1032	1.65309	1.81178	1.70924	1.46748		0.930581	1.85614	1.95311	0.835215	1.43806	0.979355	1.54261	1.23437	0.997229
1.00836e-07	4.35834e-08	1.74956e-07	8.64959e-08	9.1364e-08	2.83995e-07	3.41704e-06	2.44559e-06	1.20422e-06	6.99687e-07	3.09822e-05	3.26997e-05	2.6623e-05	3.65822e-05	4.16516e-07	1.17224e-07	1.48575e-07	3.63696e-07	1.40937e-07	1.19415e-07	1.10991e-07	1.65813e-07	2.3985e-07	2.95924e-07	2.02554e-07	4.82443e-07	0.682659	1.20881	2.41798	1.31489	1.33314	1.67905	1.11142	1.31758	1.39082	1.34924	1.77135	1.69289	1.35741	1.60253		1.75298	1.28422	2.00781	1.56834	1.01283	1.08771	1.44563	1.05654	1.31318
4.14821e-08	9.14104e-08	6.58215e-08	7.96176e-08	1.27835e-07	2.234e-07	3.416e-06	2.30472e-06	1.0888e-06	5.01907e-07	3.00115e-05	2.88252e-05	3.30845e-05	3.74906e-05	3.53299e-07	2.20821e-07	2.35941e-07	3.68847e-07	1.4398e-07	1.98615e-07	1.30735e-07	1.73293e-07	3.27989e-07	2.1557e-07	2.05375e-07	4.48655e-07		1.27514	0.909688	1.21033	1.86531	1.3208	1.11108	1.24168	1.25751	0.967854	1.71585	1.4923	1.68685	1.64232		1.27043	2.03937	2.03625	1.6022	1.68457	1.2812	1.51085	1.44479	0.956603
1.02146e-07	4.89615e-08	1.25531e-07	1.27765e-07	5.32387e-08	1.89823e-07	4.03184e-06	2.31714e-06	1.1804e-06	6.46147e-07	2.66773e-05	3.19303e-05	2.77242e-05	3.57048e-05	2.80156e-07	1.60035e-07	2.19357e-07	3.49178e-07	1.00108e-07	1.83241e-07	1.49236e-07	1.48794e-07	3.65258e-07	3.46561e-07	3.16329e-07	5.11356e-07	1.89093	0.633681	1.73491	1.94225	0.776835	1.12228	1.31138	1.24837	1.36331	1.246	1.52522	1.65305	1.41355	1.56409		1.74513	1.89602	1.92766	1.11399	1.55417	1.46251	1.29726	1.60896	1.53788
7.5006e-08	3.24062e-08	9.71777e-08	1.17399e-07	1.16925e-07	1.6696e-07	3.35396e-06	1.8522e-06	1.01636e-06	5.22257e-07	2.90774e-05	3.09862e-05	3.39205e-05	3.59184e-05	2.9287e-07	2.19831e-07	2.56054e-07	2.82083e-07	1.09754e-07	2.06641e-07	1.1769e-07	1.78399e-07	2.27987e-07	3.43558e-07	3.37905e-07	5.18268e-07	0.708719	1.57374	1.34305	1.78467	1.70612	0.987108	1.0909	0.997883	1.17385	1.0071	1.66244	1.60418	1.72948	1.57345		2.23723	2.21321	1.55726	1.22133	1.75264	1.15335	1.55536	1.00428	1.52455
6.39235e-08	9.02126e-08	1.47224e-07	7.75796e-08	1.50078e-07	2.26121e-07	3.61344e-06	2.16074e-06	1.03076e-06	5.28606e-07	2.01822e-05	3.08852e-05	3.23215e-05	3.62701e-05	2.44739e-07	2.81821e-07	2.48528e-07	1.89568e-07	9.64669e-08	1.43559e-07	1.84747e-07	1.56611e-07	3.38337e-07	2.46529e-07	2.23612e-07	5.1354e-07	1.83638	1.42488	2.03472	1.17934	2.18987	1.33689	1.1753	1.16411	1.19048	1.01934	1.15388	1.59895	1.64795	1.58886			2.14816	1.04652	1.07348	1.21761	1.8105	1.3654	1.49038	1.09399
9.72764e-08	4.24116e-08	6.01758e-08	1.11074e-07	7.65086e-08	2.43734e-07	4.11441e-06	2.11013e-06	1.06185e-06	4.5965e-07	3.23396e-05	3.07391e-05	2.21144e-05	4.13979e-05	3.30772e-07	2.46337e-07	2.30346e-07	3.7361e-07	1.24592e-07	1.63532e-07	1.23364e-07	1.67158e-07	2.54018e-07	2.91228e-07	3.06572e-07	4.88631e-07	0.943504	1.37458	0.831662	1.68852	1.11638	1.44102	1.33824	1.13685	1.22638	0.886366	1.84896	1.59138	1.12753	1.81349		1.95554	1.99101	2.06254	1.38645	1.38701	1.20896	1.45736	1.11895	1.29234
1.33466e-07	7.50479e-08	7.11582e-08	8.58727e-08	9.20845e-08	2.42104e-07	3.42009e-06	1.89311e-06	8.88436e-07	6.24507e-07	3.09533e-05	1.99217e-05	3.27888e-05	3.9303e-05	3.80433e-07	1.80957e-07	2.0995e-07	3.86015e-07	1.29274e-07	1.01021e-07	1.17959e-07	1.00752e-07	3.725e-07	2.85876e-07	2.30445e-07	4.88824e-07	1.49584	1.60622	0.983444	1.30541	1.34366	1.43138	1.11241	1.01993	1.0261	1.20427	1.7697	1.03136	1.67178	1.72172		1.43652	1.81472	2.13102	1.43855	0.856819	1.15599	0.878404	1.64086	1.26859
		1.3553e-07	1.30254e-07	8.69709e-08	2.49866e-07	3.55755e-06	1.75801e-06	9.40854e-07	4.32194e-07	2.01415e-05	2.94741e-05	3.14827e-05	2.63198e-05	2.17834e-07	2.38549e-07	2.42612e-07	3.06653e-07	1.01724e-07	1.2682e-07	8.9856e-08	8.94624e-08	2.79819e-07	3.1295e-07	1.36337e-07	5.19473e-07	0.719631	0.705699	1.8731	1.98008	1.26904	1.47727	1.15712	0.947137	1.08664	0.833422	1.15155	1.5259	1.60518	1.15297	2.17212	1.89372	2.09703	1.6929	1.13198	1.07563	0.880583	0.779974	1.2326	1.38873
		8.11966e-08	1.18872e-07	9.94082e-08	2.36136e-07	3.33838e-06	2.11682e-06	8.44397e-07	4.53695e-07	3.14142e-05	2.22167e-05	2.07795e-05	4.1808e-05	3.61535e-07	2.79343e-07	2.41307e-07	4.05327e-07	7.37407e-08	1.485e-07	1.50478e-07	1.66574e-07	3.00322e-07	2.68728e-07	1.76187e-07	5.39811e-07	0.605106	1.31477	1.12218	1.80706	1.45052	1.39609	1.08583	1.14045	0.975237	0.874884	1.79605	1.15018	1.05947	1.83145		2.21756	2.08575	2.23764	0.820582	1.25952	1.47467	1.45227	1.32292	1.1925
		5.79271e-08	7.59196e-08	7.24547e-08	2.28153e-07	3.75132e-06	1.89115e-06	1.07765e-06	4.59544e-07	2.79237e-05	1.8093e-05	2.1359e-05	4.14865e-05	3.52864e-07	1.95642e-07	2.65381e-07	2.3791e-07	1.20049e-07	1.22282e-07	1.28476e-07	1.15685e-07	2.46755e-07	2.79336e-07	2.89993e-07	4.21303e-07	1.73818	0.845352	0.800583	1.15411	1.05723	1.3489	1.22014	1.01887	1.24463	0.886163	1.59648	0.936687	1.08902	1.81737	2.27057	1.55311	2.29383	1.3134	1.33589	1.03714	1.25906	1.00859	1.08696	1.23957
		5.19473e-08	1.07948e-07	1.04372e-07	2.12311e-07	3.53847e-06	1.71423e-06	1.25141e-06	7.11099e-07	1.96833e-05	2.17048e-05	3.75742e-05	2.93851e-05	4.54755e-07	2.58089e-07	2.07546e-07	1.78288e-07	1.04976e-07	1.59337e-07	1.55231e-07	1.24392e-07	3.21399e-07	2.54659e-07	2.3935e-07	4.61911e-07	0.715053	1.77301	0.717939	1.641	1.52295	1.25523	1.15091	0.923553	1.44531	1.37125	1.12535	1.12367	1.91577	1.28725	2.00728	2.04884	1.79393	0.984253	1.16817	1.35143	1.52126	1.08451	1.41576	1.13006
		7.68204e-08	1.22211e-07	6.02085e-08	2.07242e-07	4.01957e-06	1.92431e-06	1.22462e-06	6.75008e-07	1.81863e-05	2.18793e-05	1.79088e-05	2.73449e-05	3.95287e-07	1.84618e-07	1.77542e-07	3.57646e-07	1.01513e-07	1.4557e-07	1.78522e-07	1.91063e-07	2.5382e-07	3.24102e-07	2.5346e-07	5.26168e-07		0.949666	1.0617	1.85781	0.878536	1.22527	1.30739	1.03673	1.41437	1.30165	1.03977	1.13271	0.913102	1.19788	2.22613	1.46559	1.53459	1.97441	1.12964	1.23466	1.7495	1.66577	1.11807	1.43822
		8.56938e-08	1.12343e-07	5.85994e-08	2.8241e-07	4.37254e-06	2.33026e-06	1.05928e-06	4.7797e-07	2.08935e-05	2.49729e-05	2.4039e-05	3.95247e-05	4.13202e-07	1.82682e-07	1.62394e-07	2.23296e-07	1.42514e-07	1.35607e-07	1.26635e-07	1.28134e-07	3.16957e-07	3.34072e-07	2.46531e-07	4.18479e-07	1.76075		1.18433	1.7078	0.855056	1.66968	1.4222	1.25545	1.22341	0.921694	1.19455	1.29286	1.22566	1.73143	1.65294	1.45022	1.40367	1.23272	1.58588	1.15016	1.24101	1.11713	1.3962	1.48246
		1.11128e-07	9.23164e-08	8.4515e-08	2.38757e-07	3.62522e-06	2.23967e-06	1.10018e-06	5.76834e-07	3.21662e-05	2.55299e-05	2.51123e-05	2.82186e-05	3.65289e-07	2.86648e-07	2.47042e-07	3.19243e-07	1.20027e-07	1.5692e-07	1.32969e-07	1.46333e-07	2.98199e-07	2.903e-07	2.715e-07	4.34422e-07	1.29293	0.628556	1.53584	1.40337	1.23321	1.41159	1.17913	1.20664	1.27066	1.11234	1.83904	1.3217	1.28038	1.23615		2.27555	2.13533	1.7624	1.33566	1.33093	1.30309	1.2758	1.31356	1.28822
		5.78596e-08	1.08857e-07	1.04e-07	2.84474e-07	3.92278e-06	2.2835e-06	1.09203e-06	6.85435e-07	1.97406e-05	2.11849e-05	2.05336e-05	2.98739e-05	4.05115e-07	1.52955e-07	2.93201e-07	3.56345e-07	1.28023e-07	1.66461e-07	1.27702e-07	1.26287e-07	2.9261e-07	3.16678e-07	2.18513e-07	5.49036e-07	1.10189	1.74978	0.79965	1.65481	1.51752	1.68188	1.27591	1.23025	1.26125	1.32176	1.12863	1.09676	1.04693	1.30866		1.21423	2.5343	1.96723	1.42463	1.41185	1.25148	1.10103	1.28895	1.40528
		9.82545e-08	9.74305e-08	1.35548e-07	2.75762e-07	3.91802e-06	2.33861e-06	9.99615e-07	4.22378e-07	1.99894e-05	2.12676e-05	2.29635e-05	2.80653e-05	3.00805e-07	2.99524e-07	2.02291e-07	2.204e-07	1.08139e-07	1.11108e-07	1.2435e-07	1.43055e-07	3.7174e-07	3.09424e-07	2.94784e-07	5.91823e-07	1.67681	0.822622	1.35793	1.48111	1.97785	1.63038	1.27436	1.25994	1.15451	0.814494	1.14286	1.10104	1.17082	1.22944	1.91774	2.37777	1.74851	1.21673	1.20337	0.94237	1.21862	1.24722	1.63751	1.37308
		8.13361e-08	8.97431e-08	1.36001e-07	2.72888e-07	3.48315e-06	1.92305e-06	1.0827e-06	5.89513e-07	2.54394e-05	2.99395e-05	3.76726e-05	3.43717e-05	3.48994e-07	2.33728e-07	2.30934e-07	3.05491e-07	1.24605e-07	1.64473e-07	1.39795e-07	1.55662e-07	2.50626e-07	2.78846e-07	1.75317e-07	4.82662e-07		1.45564	1.12411	1.36425	1.98447	1.61338	1.13292	1.03606	1.25046	1.13679	1.45445	1.54999	1.92078	1.5057		1.85545	1.9961	1.68648	1.3866	1.39499	1.36998	1.35713	1.10401	1.23739
[truncated: 5 more columns]

## Sheet: best
	20211112-4-1	20211112-4-2	20211112-4-3	20211112-4-4	20211122-2-1	20211122-2-2	20211122-2-3	20211122-2-4	20211123-2-1	20211123-2-2	20211123-2-3	20211123-2-4	20211124-2-1	20211124-2-2	20211124-2-3	20211124-2-4	20211126-2-1	20211126-2-2	20211126-2-3	20211126-2-4	20211130-1	20211130-2	20211130-3	20211130-4				6.5782e-08		1.6914e-07	3.07449e-06	1.85613e-06	8.65837e-07	5.18578e-07	1.74907e-05	1.93159e-05	1.96131e-05	2.28278e-05		1.25968e-07			8.98639e-08	1.17903e-07		1.14699e-07	2.27015e-07	2.2535e-07
	4.99472e-08	4.1814e-08	8.68331e-08	1.83055e-07	3.53289e-06	1.9485e-06	9.46921e-07	5.83733e-07	1.8765e-05	2.24101e-05	2.54235e-05	1.92954e-05	1.69732e-07	1.27853e-07	1.12389e-07	2.06088e-07	7.73791e-08	1.13666e-07	1.12748e-07	9.50351e-08	2.31777e-07	2.17839e-07	1.42015e-07	3.62362e-07				0.635645		1.08227	1.1491	1.04977	1.09365	1.12564	1.07286	1.16019	1.29625	0.845261		1.01496			0.861071	0.964065		0.828559	1.02098	0.966669
	9.04913e-08	5.56288e-08	3.1514e-08	1.15984e-07	3.01111e-06	1.80396e-06	8.17061e-07	4.72213e-07	2.15701e-05	2.15318e-05	1.76679e-05	2.81276e-05	1.81286e-07	1.23398e-07	9.82127e-08	1.69425e-07	9.3627e-08	1.03827e-07	1.02408e-07	1.28562e-07	2.28363e-07	3.0058e-07	1.70297e-07	3.64498e-07				0.845654		0.685728	0.979385	0.971898	0.943666	0.910593	1.23323	1.11472	0.90082	1.23216		0.979598			1.04188	0.880618		1.12086	1.00594	1.33384
	7.23958e-08	6.957e-08	3.8041e-08	1.97072e-07	2.59823e-06	1.62283e-06	7.52469e-07	5.54616e-07	1.70104e-05	1.92826e-05	1.29087e-05	2.82141e-05	1.6667e-07	1.20868e-07	1.28265e-07	2.19656e-07	1.0984e-07	1.20979e-07	1.06962e-07	1.3123e-07	2.35017e-07	2.91897e-07	1.36704e-07	4.11839e-07				1.05758		1.16514	0.845092	0.87431	0.869065	1.0695	0.972537	0.998274	0.658166	1.23595		0.959512			1.22229	1.02609		1.14412	1.03525	1.29531
	5.94978e-08	8.00908e-08	7.88414e-08	1.83694e-07	2.66689e-06	1.63115e-06	8.03604e-07	4.9046e-07	1.32915e-05	1.59767e-05	2.91407e-05	2.24605e-05	1.77651e-07	1.14171e-07	1.04597e-07	1.28144e-07	7.50811e-08	1.19837e-07	8.86548e-08	1.26556e-07	2.12047e-07	2.202e-07	1.42117e-07	2.62245e-07				1.21752		1.08605	0.867423	0.878795	0.928124	0.945779	0.759916	0.827125	1.48578	0.983911		0.906349			0.835498	1.0164		1.10337	0.934066	0.977146
	9.36449e-08	8.50359e-08	6.77396e-08	1.582e-07	3.17137e-06	1.99764e-06	8.7308e-07	5.18738e-07	1.41749e-05	1.94377e-05	1.7333e-05	2.11432e-05	1.84557e-07	1.65263e-07	1.16799e-07	1.44142e-07	9.52836e-08	1.22714e-07	1.15787e-07	9.43547e-08	2.36298e-07	1.71465e-07	1.19541e-07	3.53291e-07				1.29269		0.93532	1.03151	1.07624	1.00837	1.00031	0.810423	1.0063	0.883743	0.926206		1.31194			1.06031	1.04081		0.822627	1.04089	0.760885
	8.50605e-08	6.32496e-08	7.53144e-08	2.11244e-07	3.32469e-06	1.96269e-06	9.75473e-07	5.16546e-07	1.97452e-05	1.86221e-05	1.70238e-05	2.04431e-05	1.94254e-07	9.34683e-08	1.04984e-07	2.13364e-07	7.2229e-08	1.19098e-07	7.87966e-08	9.61059e-08	1.96151e-07	1.87685e-07	2.04335e-07	4.88146e-07				0.961504		1.24893	1.08138	1.05741	1.12662	0.996082	1.1289	0.964081	0.86798	0.895534		0.741998			0.80376	1.01014		0.837894	0.864043	0.832862
	4.29884e-08	6.05828e-08	8.87558e-08	1.98709e-07	3.23472e-06	1.97165e-06	9.49003e-07	5.23494e-07	1.68291e-05	2.37017e-05	2.41175e-05	2.42327e-05	1.9033e-07	1.1915e-07	1.22083e-07	2.10219e-07	9.45556e-08	1.13477e-07	1.02841e-07	1.27696e-07	2.19374e-07	2.02726e-07	1.31314e-07	2.85112e-07				0.920964		1.17482	1.05211	1.06224	1.09605	1.00948	0.962169	1.22705	1.22966	1.06154		0.945871			1.05221	0.962461		1.11331	0.966341	0.899608
	8.48231e-08	7.02839e-08	8.12233e-08	1.05163e-07	3.05604e-06	1.91057e-06	8.09086e-07	4.88821e-07	1.85397e-05	1.35648e-05	1.329e-05	1.87057e-05	1.91377e-07	1.43576e-07	1.38215e-07	1.58087e-07	1.00916e-07	1.29624e-07	1.08134e-07	1.18054e-07	2.57092e-07	2.10406e-07	1.46806e-07	3.64795e-07				1.06844		0.621751	0.993998	1.02933	0.934456	0.942618	1.05997	0.70226	0.677605	0.819428		1.13977			1.12298	1.09941		1.02925	1.13249	0.933687
																												1.09222		1.01337	1.00528	1.02081	1.01872	0.978854	0.944275	0.945364	1.02895	0.937324		1.00919			0.974953	1.02585		0.981292	0.987566	0.880838
	4.35518e-08	9.02292e-08	1.27843e-07	2.15688e-07	3.70644e-06	2.30197e-06	1.22406e-06	7.4776e-07	3.70904e-05	1.39095e-05	3.80465e-05	4.46491e-05	1.33833e-07	9.7689e-08	1.65572e-07	2.57712e-07	7.28178e-08	1.98199e-07	1.21917e-07	1.30792e-07	2.43857e-07	2.7709e-07	1.09921e-07	4.35984e-07				1.37164		1.2752	1.20554	1.2402	1.41373	1.44194	2.12057	0.720103	1.93985	1.95591		0.775504			0.810312	1.68104		1.1403	1.07419	1.2296
	1.15549e-07	1.96847e-07	5.26645e-08	2.01582e-07	3.85092e-06	2.11317e-06	8.83612e-07	7.24016e-07	1.43636e-05	1.4325e-05	1.86465e-05	2.32489e-05	2.37294e-07	1.43712e-07	1.91601e-07	2.64582e-07	9.59526e-08	2.29648e-07	1.85457e-07	1.31438e-07	3.0476e-07	3.72922e-07	2.15842e-07	5.45816e-07				2.99242		1.19181	1.25254	1.13848	1.02053	1.39616	0.821212	0.741617	0.950717	1.01845		1.14085			1.06776	1.94778		1.14594	1.34247	1.65486
	8.18545e-08	1.26436e-07	7.12498e-08	2.25426e-07	3.95517e-06	2.29707e-06	1.03059e-06	6.0305e-07	1.42557e-05	2.47758e-05	2.64271e-05	2.26906e-05	2.74501e-07	2.38697e-07	2.57598e-07	1.64677e-07	8.77053e-08	1.21764e-07	1.01623e-07	9.98791e-08	2.80609e-07	2.45362e-07	2.18599e-07	3.81886e-07				1.92205		1.33278	1.28645	1.23756	1.19029	1.16289	0.815043	1.28266	1.34742	0.99399		1.89489			0.97598	1.03275		0.870791	1.23608	1.0888
	1.74423e-07	8.34898e-08	6.79233e-08	2.37285e-07	4.43197e-06	2.33018e-06	1.09932e-06	5.42108e-07	1.59416e-05	2.21376e-05	1.94695e-05	2.66704e-05	6.36167e-08	1.82422e-07	1.1234e-07	2.03936e-07	1.28778e-07	1.35139e-07	1.76668e-07	1.73463e-07	2.51955e-07	2.69203e-07	1.8684e-07	3.61915e-07				1.26919		1.40289	1.44153	1.2554	1.26966	1.04537	0.911433	1.14608	0.992677	1.16833		1.44816			1.43304	1.14619		1.51233	1.10986	1.1946
	1.11479e-07	8.20671e-08	8.2267e-08	2.69727e-07	4.21049e-06	2.55559e-06	1.15536e-06	4.97894e-07	2.5209e-05	2.21184e-05	2.1354e-05	3.79293e-05	2.08633e-07	1.62148e-07	1.74707e-07	2.89566e-07	1.20015e-07	9.4755e-08	1.63161e-07	1.38979e-07	3.76745e-07	3.6609e-07	1.69053e-07	4.08367e-07				1.24756		1.59469	1.36949	1.37684	1.33439	0.960114	1.44128	1.14508	1.08876	1.66154		1.28721			1.33552	0.803671		1.21169	1.65956	1.62454
	7.22735e-08	1.38898e-07	7.20452e-08	1.73692e-07	3.97162e-06	2.48328e-06	1.06331e-06	5.16942e-07	1.85268e-05	2.82727e-05	2.80937e-05	2.35401e-05	1.33676e-07	2.09613e-07	1.64522e-07	2.46999e-07	8.86355e-08	1.59833e-07	1.08183e-07	1.75412e-07	2.47059e-07	2.73993e-07	1.77111e-07	3.8696e-07				2.1115		1.02691	1.2918	1.33789	1.22807	0.996847	1.05923	1.4637	1.43239	1.0312		1.66401			0.986331	1.35563		1.52932	1.08829	1.21586
	5.72968e-08	1.00939e-07	7.79307e-08	2.16269e-07	4.10608e-06	2.26461e-06	1.1075e-06	6.52621e-07	2.11491e-05	2.07059e-05	2.11155e-05	2.9822e-05	1.56128e-07	1.16683e-07	2.64416e-07	1.89631e-07	1.39781e-07	1.42057e-07	2.0464e-07	1.70699e-07	3.55228e-07	2.27847e-07	2.70962e-07	5.15196e-07				1.53445		1.27864	1.33553	1.22007	1.27911	1.25848	1.20916	1.07196	1.0766	1.30639		0.92629			1.55548	1.20487		1.48823	1.56478	1.01108
	1.21112e-07	1.18952e-07	9.87629e-08	1.65768e-07	3.51972e-06	2.18729e-06	1.01524e-06	5.18541e-07	2.45478e-05	3.06349e-05	3.22917e-05	3.32729e-05	1.79818e-07	9.87607e-08	1.25363e-07	2.83744e-07	8.88319e-08	1.61574e-07	1.02312e-07	1.81474e-07	3.77448e-07	3.34648e-07	1.21858e-07	4.61009e-07				1.80828		0.980061	1.14481	1.17842	1.17256	0.99993	1.40347	1.58599	1.64643	1.45756		0.784011			0.988517	1.3704		1.58217	1.66266	1.48502
	6.76847e-08	8.8663e-08	5.11227e-08	1.9939e-07	4.14968e-06	2.29262e-06	1.0756e-06	5.45693e-07	2.11861e-05	3.6252e-05	3.78133e-05	2.71045e-05	1.65877e-07	2.54745e-07	9.94728e-08	2.16705e-07	9.90931e-08	1.84879e-07	1.4703e-07	1.65521e-07	2.78174e-07	3.684e-07	3.23422e-07	4.90905e-07				1.34783		1.17885	1.34971	1.23516	1.24226	1.05229	1.21128	1.87679	1.92796	1.18735					1.1027	1.56807		1.44308	1.22536	1.63479
	4.92682e-08	1.02444e-07	9.72011e-08	1.83988e-07	3.38374e-06	1.90279e-06	1.09416e-06	4.83446e-07	3.21711e-05	2.06069e-05	2.16238e-05	4.41579e-05	2.55077e-07	1.034e-07	2.55985e-07	2.85826e-07	1.05152e-07	2.17685e-07	1.48902e-07	1.48438e-07	3.36615e-07	2.52156e-07	1.67823e-07	3.5312e-07				1.55733		1.08778	1.10059	1.02514	1.2637	0.932253	1.83932	1.06684	1.10252	1.93439		0.820844			1.17012	1.84631		1.29415	1.48279	1.11896
	9.94414e-08	7.32235e-08	1.21449e-07	2.181e-07	3.54404e-06	2.24532e-06	9.4208e-07	4.28323e-07	3.39753e-05	3.29396e-05	3.48429e-05	4.53912e-05	1.82476e-07	1.78286e-07	1.02096e-07	2.44276e-07	9.30067e-08	1.12841e-07	1.13625e-07	1.63205e-07	2.99345e-07	3.2199e-07	1.43668e-07	4.58967e-07				1.11312		1.28947	1.15272	1.20968	1.08806	0.825957	1.94247	1.70531	1.77651	1.98842		1.41533			1.03497	0.957069		1.42289	1.31861	1.42885
	4.41187e-08	9.34733e-08	8.4754e-08	1.83787e-07	3.6346e-06	2.06621e-06	1.06653e-06	5.08613e-07	1.90679e-05	3.49962e-05	3.38352e-05	2.7422e-05	1.98592e-07	2.60661e-07	1.54891e-07	2.46816e-07	1.01831e-07	1.94728e-07	1.59142e-07	1.06297e-07	2.65252e-07	2.92601e-07	2.94833e-07	4.53268e-07						1.0866	1.18218	1.11319	1.23179	0.980785	1.09017	1.81178	1.72513	1.20125		2.06925			1.13317	1.6516		0.926743	1.16844	1.29843
	9.71168e-08	8.65838e-08	1.46696e-07	2.02302e-07	3.40705e-06	2.06759e-06	1.13575e-06	5.72094e-07	2.89137e-05	3.26997e-05	3.35236e-05	3.34993e-05	1.91903e-07	1.8153e-07	2.14743e-07	3.53787e-07	7.50556e-08	1.69552e-07	9.99348e-08	1.76937e-07	2.80221e-07	2.24725e-07	2.28625e-07	3.67458e-07				1.42096		1.19606	1.10817	1.11393	1.31173	1.1032	1.65309	1.69289	1.70924	1.46748		1.44107			0.835215	1.43806		1.54261	1.23437	0.997229
	1.74956e-07	6.14777e-08	9.1364e-08	2.83995e-07	3.41704e-06	2.44559e-06	1.20422e-06	6.99687e-07	3.09822e-05	2.88252e-05	2.6623e-05	3.65822e-05	4.16516e-07	1.17224e-07	1.48575e-07	3.63696e-07	1.40937e-07	1.19415e-07	1.10991e-07	1.65813e-07	2.3985e-07	2.95924e-07	2.02554e-07	4.82443e-07				1.31622		1.67905	1.11142	1.31758	1.39082	1.34924	1.77135	1.4923	1.35741	1.60253		0.930581			1.56834	1.01283		1.44563	1.05654	1.31318
	6.58215e-08	8.64959e-08	1.27835e-07	2.234e-07	3.416e-06	2.30472e-06	1.0888e-06	5.01907e-07	3.00115e-05	3.19303e-05	3.30845e-05	3.74906e-05	3.53299e-07	2.20821e-07	2.35941e-07	3.68847e-07	1.4398e-07	1.98615e-07	1.30735e-07	1.73293e-07	3.27989e-07	2.1557e-07	2.05375e-07	4.48655e-07				0.934568		1.3208	1.11108	1.24168	1.25751	0.967854	1.71585	1.65305	1.68685	1.64232		1.75298			1.6022	1.68457		1.51085	1.44479	0.956603
	1.25531e-07	7.96176e-08	5.32387e-08	1.89823e-07	4.03184e-06	2.31714e-06	1.1804e-06	6.46147e-07	2.66773e-05	3.09862e-05	2.77242e-05	3.57048e-05	2.80156e-07	1.60035e-07	2.19357e-07	3.49178e-07	1.00108e-07	1.83241e-07	1.49236e-07	1.48794e-07	3.65258e-07	3.46561e-07	3.16329e-07	5.11356e-07				1.31489		1.12228	1.31138	1.24837	1.36331	1.246	1.52522	1.60418	1.41355	1.56409		1.27043			1.11399	1.55417		1.29726	1.60896	1.53788
	9.71777e-08	1.27765e-07	1.16925e-07	1.6696e-07	3.35396e-06	1.8522e-06	1.01636e-06	5.22257e-07	2.90774e-05	3.08852e-05	3.39205e-05	3.59184e-05	2.9287e-07	2.19831e-07	2.56054e-07	2.82083e-07	1.09754e-07	2.06641e-07	1.1769e-07	1.78399e-07	2.27987e-07	3.43558e-07	3.37905e-07	5.18268e-07				1.21033		0.987108	1.0909	0.997883	1.17385	1.0071	1.66244	1.59895	1.72948	1.57345		1.74513			1.22133	1.75264		1.55536	1.00428	1.52455
	1.47224e-07	1.17399e-07	1.50078e-07	2.26121e-07	3.61344e-06	2.11013e-06	1.03076e-06	5.28606e-07	2.01822e-05	3.07391e-05	3.23215e-05	3.62701e-05	2.44739e-07	2.81821e-07	2.48528e-07	1.89568e-07	9.64669e-08	1.43559e-07	1.84747e-07	1.56611e-07	3.38337e-07	2.46529e-07	2.23612e-07	5.1354e-07				1.94225		1.33689	1.1753	1.13685	1.19048	1.01934	1.15388	1.59138	1.64795	1.58886		2.23723			1.07348	1.21761		1.3654	1.49038	1.09399
	6.01758e-08	7.75796e-08	7.65086e-08	2.43734e-07	4.11441e-06	1.89311e-06	1.06185e-06	3.65864e-07	3.23396e-05	1.99217e-05	2.21144e-05	4.13979e-05	3.30772e-07	2.46337e-07	2.30346e-07	3.7361e-07	1.24592e-07	1.63532e-07	1.23364e-07	1.67158e-07	2.54018e-07	2.91228e-07	3.06572e-07	4.88631e-07				1.78467		1.44102	1.33824	1.01993	1.22638	0.705515	1.84896	1.03136	1.12753	1.81349		1.95554			1.38645	1.38701		1.45736	1.11895	1.29234
	7.11582e-08	1.11074e-07	9.20845e-08	2.42104e-07	3.42009e-06	1.75801e-06	8.88436e-07	4.5965e-07	3.09533e-05	4.19484e-05	3.27888e-05	3.9303e-05	3.80433e-07	1.80957e-07	2.0995e-07	3.86015e-07	1.29274e-07	1.01021e-07	1.17959e-07	1.00752e-07	3.725e-07	2.85876e-07	2.30445e-07	4.88824e-07				1.17934		1.43138	1.11241	0.947137	1.0261	0.886366	1.7697	2.1717	1.67178	1.72172		1.43652			1.43855	0.856819		0.878404	1.64086	1.26859
	1.3553e-07	8.58727e-08	8.69709e-08	2.49866e-07	3.55755e-06	2.11682e-06	9.40854e-07	6.24507e-07	2.01415e-05	2.94741e-05	3.14827e-05	2.63198e-05	2.17834e-07	2.38549e-07	2.42612e-07	3.06653e-07	1.01724e-07	1.2682e-07	8.9856e-08	8.94624e-08	2.79819e-07	3.1295e-07	1.36337e-07	5.19473e-07				1.68852		1.47727	1.15712	1.14045	1.08664	1.20427	1.15155	1.5259	1.60518	1.15297		1.89372			1.13198	1.07563		0.779974	1.2326	1.38873
	8.11966e-08	1.30254e-07	9.94082e-08	2.36136e-07	3.33838e-06	1.89115e-06	8.44397e-07	4.32194e-07	3.14142e-05	2.22167e-05	2.07795e-05	4.1808e-05	3.61535e-07	2.79343e-07	2.41307e-07	4.05327e-07	7.37407e-08	1.485e-07	1.50478e-07	1.66574e-07	3.00322e-07	2.68728e-07	1.76187e-07	5.39811e-07				1.30541		1.39609	1.08583	1.01887	0.975237	0.833422	1.79605	1.15018	1.05947	1.83145		2.21756			0.820582	1.25952		1.45227	1.32292	1.1925
	5.79271e-08	1.18872e-07	7.24547e-08	2.28153e-07	3.75132e-06	1.71423e-06	1.07765e-06	4.53695e-07	2.79237e-05	1.8093e-05	2.1359e-05	4.14865e-05	3.52864e-07	1.95642e-07	2.65381e-07	2.3791e-07	1.20049e-07	1.22282e-07	1.28476e-07	1.15685e-07	2.46755e-07	2.79336e-07	2.89993e-07	4.21303e-07				1.98008		1.3489	1.22014	0.923553	1.24463	0.874884	1.59648	0.936687	1.08902	1.81737		1.55311			1.33589	1.03714		1.00859	1.08696	1.23957
	5.19473e-08	7.59196e-08	1.04372e-07	2.12311e-07	3.53847e-06	1.92431e-06	1.25141e-06	4.59544e-07	1.96833e-05	2.17048e-05	3.75742e-05	2.93851e-05	4.54755e-07	2.58089e-07	2.07546e-07	1.78288e-07	1.04976e-07	1.59337e-07	1.55231e-07	1.24392e-07	3.21399e-07	2.54659e-07	2.3935e-07	4.61911e-07				1.80706		1.25523	1.15091	1.03673	1.44531	0.886163	1.12535	1.12367	1.91577	1.28725		2.04884			1.16817	1.35143		1.08451	1.41576	1.13006
	7.68204e-08	1.07948e-07	6.02085e-08	2.07242e-07	4.01957e-06	2.33026e-06	1.22462e-06	7.11099e-07	1.81863e-05	3.76279e-05	1.79088e-05	2.73449e-05	3.95287e-07	1.84618e-07	1.77542e-07	3.57646e-07	1.01513e-07	1.4557e-07	1.78522e-07	1.91063e-07	2.5382e-07	3.24102e-07	2.5346e-07	5.26168e-07				1.15411		1.22527	1.30739	1.25545	1.41437	1.37125	1.03977	1.94802	0.913102	1.19788		1.46559			1.12964	1.23466		1.66577	1.11807	1.43822
	8.56938e-08	1.22211e-07	5.85994e-08	2.8241e-07	4.37254e-06	2.23967e-06	1.05928e-06	6.75008e-07	2.08935e-05	2.18793e-05	2.4039e-05	3.95247e-05	4.13202e-07	1.82682e-07	1.62394e-07	2.23296e-07	1.42514e-07	1.35607e-07	1.26635e-07	1.28134e-07	3.16957e-07	3.34072e-07	2.46531e-07	4.18479e-07				1.641		1.66968	1.4222	1.20664	1.22341	1.30165	1.19455	1.13271	1.22566	1.73143		1.45022			1.58588	1.15016		1.11713	1.3962	1.48246
	1.11128e-07	1.12343e-07	8.4515e-08	2.38757e-07	3.62522e-06	2.2835e-06	1.10018e-06	4.7797e-07	3.21662e-05	2.49729e-05	2.51123e-05	2.82186e-05	3.65289e-07	2.86648e-07	2.47042e-07	3.19243e-07	1.20027e-07	1.5692e-07	1.32969e-07	1.46333e-07	2.98199e-07	2.903e-07	2.715e-07	4.34422e-07				1.85781		1.41159	1.17913	1.23025	1.27066	0.921694	1.83904	1.29286	1.28038	1.23615		2.27555			1.33566	1.33093		1.2758	1.31356	1.28822
	5.78596e-08	9.23164e-08	1.04e-07	2.84474e-07	3.92278e-06	2.33861e-06	1.09203e-06	5.76834e-07	1.97406e-05	2.55299e-05	2.05336e-05	2.98739e-05	4.05115e-07	1.52955e-07	2.93201e-07	3.56345e-07	1.28023e-07	1.66461e-07	1.27702e-07	1.26287e-07	2.9261e-07	3.16678e-07	2.18513e-07	5.49036e-07				1.7078		1.68188	1.27591	1.25994	1.26125	1.11234	1.12863	1.3217	1.04693	1.30866		1.21423			1.42463	1.41185		1.10103	1.28895	1.40528
	9.82545e-08	1.08857e-07	1.35548e-07	2.75762e-07	3.91802e-06	1.92305e-06	9.99615e-07	6.85435e-07	1.99894e-05	2.11849e-05	2.29635e-05	2.80653e-05	3.00805e-07	2.99524e-07	2.02291e-07	2.204e-07	1.08139e-07	1.11108e-07	1.2435e-07	1.43055e-07	3.7174e-07	3.09424e-07	2.94784e-07	5.91823e-07				1.40337		1.63038	1.27436	1.03606	1.15451	1.32176	1.14286	1.09676	1.17082	1.22944		2.37777			1.20337	0.94237		1.24722	1.63751	1.37308
	8.13361e-08	9.74305e-08	1.36001e-07	2.72888e-07	3.48315e-06	1.83498e-06	1.0827e-06	4.22378e-07	2.54394e-05	2.12676e-05	3.76726e-05	3.43717e-05	3.48994e-07	2.33728e-07	2.30934e-07	3.05491e-07	1.24605e-07	1.64473e-07	1.39795e-07	1.55662e-07	2.50626e-07	2.78846e-07	1.75317e-07	4.82662e-07				1.65481		1.61338	1.13292	0.988609	1.25046	0.814494	1.45445	1.10104	1.92078	1.5057		1.85545			1.3866	1.39499		1.35713	1.10401	1.23739
		8.97431e-08						5.89513e-07
		6.39643e-08																										1.65296		1.60138	1.2569	1.1443	1.23206	1.09439	1.35191	1.18901	1.32892	1.40228		1.83464			1.38723	1.24606		1.21966	1.34804	1.35729
		5.82731e-08
		9.23164e-08
		1.08857e-07
		9.74305e-08
		8.97431e-08
		4.51728e-08
		5.73978e-08
[truncated: 4 more columns]

## Sheet: Sheet3
20211112-3-1	20211112-3-2	20211112-4-1	20211112-4-2	20211112-4-3	20211112-4-4	20211122-2-1	20211122-2-2	20211122-2-3	20211122-2-4	20211123-2-1	20211123-2-2	20211123-2-3	20211123-2-4	20211124-2-1	20211124-2-2	20211124-2-3	20211124-2-4	20211126-2-1	20211126-2-2	20211126-2-3	20211126-2-4	20211130-1	20211130-2	20211130-3	20211130-4		5.15566e-08		6.5782e-08	6.85328e-08		3.07449e-06	1.85613e-06	8.65837e-07	5.18578e-07		1.93159e-05	1.96131e-05	2.28278e-05		1.25968e-07	1.15693e-07	1.81141e-07	8.98639e-08				2.27015e-07	2.2535e-07
4.63413e-08	5.14219e-08	4.99472e-08	4.1814e-08	8.68331e-08	1.83055e-07	3.53289e-06	1.9485e-06	9.46921e-07	5.83733e-07	1.8765e-05	2.24101e-05	2.54235e-05	1.92954e-05	1.69732e-07	1.27853e-07	1.12389e-07	2.06088e-07	7.73791e-08	1.13666e-07	1.12748e-07	9.50351e-08	2.31777e-07	2.17839e-07	1.42015e-07	3.62362e-07		0.997388		0.635645	1.26703		1.1491	1.04977	1.09365	1.12564		1.16019	1.29625	0.845261		1.01496	0.971441	1.13772	0.861071				1.02098	0.966669
7.52716e-08	3.60546e-08	9.04913e-08	5.56288e-08	3.1514e-08	1.15984e-07	3.01111e-06	1.80396e-06	8.17061e-07	4.72213e-07	2.15701e-05	2.15318e-05	1.76679e-05	2.81276e-05	1.81286e-07	1.23398e-07	9.82127e-08	1.69425e-07	9.3627e-08	1.03827e-07	1.02408e-07	1.28562e-07	2.28363e-07	3.0058e-07	1.70297e-07	3.64498e-07		0.699322		0.845654	0.459838		0.979385	0.971898	0.943666	0.910593		1.11472	0.90082	1.23216		0.979598	0.848907	0.935325	1.04188				1.00594	1.33384
6.75327e-08	3.151e-08	7.23958e-08	6.957e-08	3.8041e-08	1.97072e-07	2.59823e-06	1.62283e-06	7.52469e-07	5.54616e-07	1.70104e-05	1.92826e-05	1.29087e-05	2.82141e-05	1.6667e-07	1.20868e-07	1.28265e-07	2.19656e-07	1.0984e-07	1.20979e-07	1.06962e-07	1.3123e-07	2.35017e-07	2.91897e-07	1.36704e-07	4.11839e-07		0.611174		1.05758	0.555077		0.845092	0.87431	0.869065	1.0695		0.998274	0.658166	1.23595		0.959512	1.10866	1.21262	1.22229				1.03525	1.29531
5.57927e-08	5.88004e-08	5.94978e-08	8.00908e-08	7.88414e-08	1.83694e-07	2.66689e-06	1.63115e-06	8.03604e-07	4.9046e-07	1.32915e-05	1.59767e-05	2.91407e-05	2.24605e-05	1.77651e-07	1.14171e-07	1.04597e-07	1.28144e-07	7.50811e-08	1.19837e-07	8.86548e-08	1.26556e-07	2.12047e-07	2.202e-07	1.42117e-07	2.62245e-07		1.1405		1.21752	1.15042		0.867423	0.878795	0.928124	0.945779		0.827125	1.48578	0.983911		0.906349	0.904093	0.707429	0.835498				0.934066	0.977146
4.78103e-08	6.35832e-08	9.36449e-08	8.50359e-08	6.77396e-08	1.582e-07	3.17137e-06	1.99764e-06	8.7308e-07	5.18738e-07	1.41749e-05	1.94377e-05	1.7333e-05	2.11432e-05	1.84557e-07	1.65263e-07	1.16799e-07	1.44142e-07	9.52836e-08	1.22714e-07	1.15787e-07	9.43547e-08	2.36298e-07	1.71465e-07	1.19541e-07	3.53291e-07		1.23327		1.29269	0.988426		1.03151	1.07624	1.00837	1.00031		1.0063	0.883743	0.926206		1.31194	1.00956	0.795745	1.06031				1.04089	0.760885
6.69054e-08	6.49688e-08	8.50605e-08	6.32496e-08	7.53144e-08	2.11244e-07	3.32469e-06	1.96269e-06	9.75473e-07	5.16546e-07	1.97452e-05	1.86221e-05	1.70238e-05	2.04431e-05	1.94254e-07	9.34683e-08	1.04984e-07	2.13364e-07	7.2229e-08	1.19098e-07	7.87966e-08	9.61059e-08	1.96151e-07	1.87685e-07	2.04335e-07	4.88146e-07		1.26015		0.961504	1.09895		1.08138	1.05741	1.12662	0.996082		0.964081	0.86798	0.895534		0.741998	0.907432	1.17789	0.80376				0.864043	0.832862
4.54766e-08	5.13783e-08	4.29884e-08	6.05828e-08	8.87558e-08	1.98709e-07	3.23472e-06	1.97165e-06	9.49003e-07	5.23494e-07	1.68291e-05	2.37017e-05	2.41175e-05	2.42327e-05	1.9033e-07	1.1915e-07	1.22083e-07	2.10219e-07	9.45556e-08	1.13477e-07	1.02841e-07	1.27696e-07	2.19374e-07	2.02726e-07	1.31314e-07	2.85112e-07		0.996542		0.920964	1.29508		1.05211	1.06224	1.09605	1.00948		1.22705	1.22966	1.06154		0.945871	1.05523	1.16053	1.05221				0.966341	0.899608
5.89702e-08	5.47352e-08	8.48231e-08	7.02839e-08	8.12233e-08	1.05163e-07	3.05604e-06	1.91057e-06	8.09086e-07	4.88821e-07	1.85397e-05	1.35648e-05	1.329e-05	1.87057e-05	1.91377e-07	1.43576e-07	1.38215e-07	1.58087e-07	1.00916e-07	1.29624e-07	1.08134e-07	1.18054e-07	2.57092e-07	2.10406e-07	1.46806e-07	3.64795e-07		1.06165		1.06844	1.18517		0.993998	1.02933	0.934456	0.942618		0.70226	0.677605	0.819428		1.13977	1.19467	0.872733	1.12298				1.13249	0.933687
																											0		0	0		0	0	0	0		0	0	0		0	0	0	0				0	0
																											0		0	0		0	0	0	0		0	0	0		0	0	0	0				0	0
																											0			0		0	0	0	0		0	0	0		0	0	0	0				0	0
5.79512e-08	4.32883e-08	4.35518e-08	9.02292e-08	1.27843e-07	2.15688e-07	3.70644e-06	2.30197e-06	1.22406e-06	7.4776e-07	3.70904e-05	3.89675e-05	3.80465e-05	4.46491e-05	1.33833e-07	9.7689e-08	1.65572e-07	2.57712e-07	7.28178e-08	1.98199e-07	1.21917e-07	1.30792e-07	2.43857e-07	2.7709e-07	1.09921e-07	4.35984e-07				0	1.86543		1.20554	1.2402	1.41373	1.44194		2.01738	1.93985	1.95591		0.775504	1.43113	1.42272	0.810312				1.07419	1.2296
8.19496e-08	4.07872e-08	1.15549e-07	1.26436e-07	5.26645e-08	2.01582e-07	3.85092e-06	2.11317e-06	8.83612e-07	7.24016e-07	1.43636e-05	1.39095e-05	1.86465e-05	2.32489e-05	2.37294e-07	1.43712e-07	1.91601e-07	2.64582e-07	9.59526e-08	2.29648e-07	1.85457e-07	1.31438e-07	3.0476e-07	3.72922e-07	2.15842e-07	5.45816e-07				1.37164	0.768457		1.25254	1.13848	1.02053	1.39616		0.720103	0.950717	1.01845		1.14085	1.65612	1.46065	1.06776				1.34247	1.65486
7.52389e-08	3.89892e-08	8.18545e-08	8.34898e-08	7.12498e-08	2.25426e-07	3.95517e-06	2.29707e-06	1.03059e-06	6.0305e-07	1.42557e-05	1.4325e-05	2.64271e-05	2.26906e-05	2.74501e-07	2.38697e-07	2.57598e-07	1.64677e-07	8.77053e-08	1.21764e-07	1.01623e-07	9.98791e-08	2.80609e-07	2.45362e-07	2.18599e-07	3.81886e-07				1.92205	1.03965		1.28645	1.23756	1.19029	1.16289		0.741617	1.34742	0.99399		1.89489	2.22656	0.909112	0.97598				1.23608	1.0888
9.41818e-08	9.59478e-08	1.74423e-07	8.20671e-08	6.79233e-08	2.37285e-07	4.43197e-06	2.33018e-06	1.09932e-06	5.42108e-07	1.59416e-05	2.47758e-05	1.94695e-05	2.66704e-05	6.36167e-08	1.82422e-07	1.1234e-07	2.03936e-07	1.28778e-07	1.35139e-07	1.76668e-07	1.73463e-07	2.51955e-07	2.69203e-07	1.8684e-07	3.61915e-07				1.26919	0.991107		1.44153	1.2554	1.26966	1.04537		1.28266	0.992677	1.16833		1.44816	0.971016	1.12585	1.43304				1.10986	1.1946
3.96028e-08	6.23222e-08	1.11479e-07	1.38898e-07	8.2267e-08	2.69727e-07	4.21049e-06	2.55559e-06	1.15536e-06	4.97894e-07	2.5209e-05	2.21376e-05	2.1354e-05	3.79293e-05	2.08633e-07	1.62148e-07	1.74707e-07	2.89566e-07	1.20015e-07	9.4755e-08	1.63161e-07	1.38979e-07	3.76745e-07	3.6609e-07	1.69053e-07	4.08367e-07				1.24756	1.2004		1.36949	1.37684	1.33439	0.960114		1.14608	1.08876	1.66154		1.28721	1.51009	1.59857	1.33552				1.65956	1.62454
1.09698e-07	6.57419e-08	7.22735e-08	1.00939e-07	7.20452e-08	1.73692e-07	3.97162e-06	2.48328e-06	1.06331e-06	5.16942e-07	1.85268e-05	2.21184e-05	2.80937e-05	2.35401e-05	1.33676e-07	2.09613e-07	1.64522e-07	2.46999e-07	8.86355e-08	1.59833e-07	1.08183e-07	1.75412e-07	2.47059e-07	2.73993e-07	1.77111e-07	3.8696e-07				2.1115	1.05125		1.2918	1.33789	1.22807	0.996847		1.14508	1.43239	1.0312		1.66401	1.42205	1.36358	0.986331				1.08829	1.21586
4.11146e-08	3.26704e-08	5.72968e-08	1.18952e-07	7.79307e-08	2.16269e-07	4.10608e-06	2.26461e-06	1.1075e-06	6.52621e-07	2.11491e-05	2.82727e-05	2.11155e-05	2.9822e-05	1.56128e-07	1.16683e-07	2.64416e-07	1.89631e-07	1.39781e-07	1.42057e-07	2.0464e-07	1.70699e-07	3.55228e-07	2.27847e-07	2.70962e-07	5.15196e-07				1.53445	1.13713		1.33553	1.22007	1.27911	1.25848		1.4637	1.0766	1.30639		0.92629	2.2855	1.04687	1.55548				1.56478	1.01108
1.06533e-07	8.11365e-08	1.21112e-07	8.8663e-08	9.87629e-08	1.65768e-07	3.51972e-06	2.18729e-06	1.01524e-06	5.18541e-07	2.45478e-05	2.07059e-05	3.22917e-05	3.32729e-05	1.79818e-07	9.87607e-08	1.25363e-07	2.83744e-07	8.88319e-08	1.61574e-07	1.02312e-07	1.81474e-07	3.77448e-07	3.34648e-07	1.21858e-07	4.61009e-07				1.80828	1.4411		1.14481	1.17842	1.17256	0.99993		1.07196	1.64643	1.45756		0.784011	1.08358	1.56643	0.988517				1.66266	1.48502
5.47351e-08	7.3462e-08	6.76847e-08	1.02444e-07	5.11227e-08	1.9939e-07	4.14968e-06	2.29262e-06	1.0756e-06	5.45693e-07	2.11861e-05	3.06349e-05	3.78133e-05	2.71045e-05	1.65877e-07	2.54745e-07	9.94728e-08	2.16705e-07	9.90931e-08	1.84879e-07	1.4703e-07	1.65521e-07	2.78174e-07	3.684e-07	3.23422e-07	4.90905e-07				1.34783	0.745959		1.34971	1.23516	1.24226	1.05229		1.58599	1.92796	1.18735		2.02229	0.859799	1.19634	1.1027				1.22536	1.63479
8.67776e-08	7.08687e-08	4.92682e-08	7.32235e-08	9.72011e-08	1.83988e-07	3.38374e-06	1.90279e-06	1.09416e-06	4.83446e-07	3.21711e-05	3.6252e-05	2.16238e-05	4.41579e-05	2.55077e-07	1.034e-07	2.55985e-07	2.85826e-07	1.05152e-07	2.17685e-07	1.48902e-07	1.48438e-07	3.36615e-07	2.52156e-07	1.67823e-07	3.5312e-07				1.55733	1.41831		1.10059	1.02514	1.2637	0.932253		1.87679	1.10252	1.93439		0.820844	2.21263	1.57792	1.17012				1.48279	1.11896
4.17476e-08	8.28113e-08	9.94414e-08	9.34733e-08	1.21449e-07	2.181e-07	3.54404e-06	2.24532e-06	9.4208e-07	4.28323e-07	3.39753e-05	2.06069e-05	3.48429e-05	4.53912e-05	1.82476e-07	1.78286e-07	1.02096e-07	2.44276e-07	9.30067e-08	1.12841e-07	1.13625e-07	1.63205e-07	2.99345e-07	3.2199e-07	1.43668e-07	4.58967e-07				1.11312	1.77213		1.15272	1.20968	1.08806	0.825957		1.06684	1.77651	1.98842		1.41533	0.882474	1.34854	1.03497				1.31861	1.42885
1.4509e-07	3.63834e-08	4.41187e-08	8.65838e-08	8.4754e-08	1.83787e-07	3.6346e-06	2.06621e-06	1.06653e-06	5.08613e-07	1.90679e-05	3.29396e-05	3.38352e-05	2.7422e-05	1.98592e-07	2.60661e-07	1.54891e-07	2.46816e-07	1.01831e-07	1.94728e-07	1.59142e-07	1.06297e-07	2.65252e-07	2.92601e-07	2.94833e-07	4.53268e-07				1.42096	1.23669		1.18218	1.11319	1.23179	0.980785		1.70531	1.72513	1.20125		2.06925	1.33881	1.36257	1.13317				1.16844	1.29843
3.51038e-08	6.77848e-08	9.71168e-08	6.14777e-08	1.46696e-07	2.02302e-07	3.40705e-06	2.06759e-06	1.13575e-06	5.72094e-07	2.89137e-05	3.49962e-05	3.35236e-05	3.34993e-05	1.91903e-07	1.8153e-07	2.14743e-07	3.53787e-07	7.50556e-08	1.69552e-07	9.99348e-08	1.76937e-07	2.80221e-07	2.24725e-07	2.28625e-07	3.67458e-07				1.31622	2.14052		1.10817	1.11393	1.31173	1.1032		1.81178	1.70924	1.46748		1.44107	1.85614	1.95311	0.835215				1.23437	0.997229
1.00836e-07	4.35834e-08	1.74956e-07	8.64959e-08	9.1364e-08	2.83995e-07	3.41704e-06	2.44559e-06	1.20422e-06	6.99687e-07	3.09822e-05	3.26997e-05	2.6623e-05	3.65822e-05	4.16516e-07	1.17224e-07	1.48575e-07	3.63696e-07	1.40937e-07	1.19415e-07	1.10991e-07	1.65813e-07	2.3985e-07	2.95924e-07	2.02554e-07	4.82443e-07		1.86102		0.934568	1.33314		1.11142	1.31758	1.39082	1.34924		1.69289	1.35741	1.60253		0.930581	1.28422	2.00781	1.56834				1.05654	1.31318
4.14821e-08	9.14104e-08	6.58215e-08	7.96176e-08	1.27835e-07	2.234e-07	3.416e-06	2.30472e-06	1.0888e-06	5.01907e-07	3.00115e-05	2.88252e-05	3.30845e-05	3.74906e-05	3.53299e-07	2.20821e-07	2.35941e-07	3.68847e-07	1.4398e-07	1.98615e-07	1.30735e-07	1.73293e-07	3.27989e-07	2.1557e-07	2.05375e-07	4.48655e-07		1.20881		1.31489	1.86531		1.11108	1.24168	1.25751	0.967854		1.4923	1.68685	1.64232		1.75298	2.03937	2.03625	1.6022				1.44479	0.956603
1.02146e-07	4.89615e-08	1.25531e-07	1.27765e-07	5.32387e-08	1.89823e-07	4.03184e-06	2.31714e-06	1.1804e-06	6.46147e-07	2.66773e-05	3.19303e-05	2.77242e-05	3.57048e-05	2.80156e-07	1.60035e-07	2.19357e-07	3.49178e-07	1.00108e-07	1.83241e-07	1.49236e-07	1.48794e-07	3.65258e-07	3.46561e-07	3.16329e-07	5.11356e-07		1.27514		1.21033	0.776835		1.31138	1.24837	1.36331	1.246		1.65305	1.41355	1.56409		1.27043	1.89602	1.92766	1.11399				1.60896	1.53788
7.5006e-08	3.24062e-08	9.71777e-08	1.17399e-07	1.16925e-07	1.6696e-07	3.35396e-06	1.8522e-06	1.01636e-06	5.22257e-07	2.90774e-05	3.09862e-05	3.39205e-05	3.59184e-05	2.9287e-07	2.19831e-07	2.56054e-07	2.82083e-07	1.09754e-07	2.06641e-07	1.1769e-07	1.78399e-07	2.27987e-07	3.43558e-07	3.37905e-07	5.18268e-07		0.633681		1.94225	1.70612		1.0909	0.997883	1.17385	1.0071		1.60418	1.72948	1.57345		1.74513	2.21321	1.55726	1.22133				1.00428	1.52455
6.39235e-08	9.02126e-08	1.47224e-07	7.75796e-08	1.50078e-07	2.26121e-07	3.61344e-06	2.16074e-06	1.03076e-06	5.28606e-07	2.01822e-05	3.08852e-05	3.23215e-05	3.62701e-05	2.44739e-07	2.81821e-07	2.48528e-07	1.89568e-07	9.64669e-08	1.43559e-07	1.84747e-07	1.56611e-07	3.38337e-07	2.46529e-07	2.23612e-07	5.1354e-07		1.57374		1.78467	2.18987		1.1753	1.16411	1.19048	1.01934		1.59895	1.64795	1.58886		2.23723	2.14816	1.04652	1.07348				1.49038	1.09399
9.72764e-08	4.24116e-08	6.01758e-08	1.11074e-07	7.65086e-08	2.43734e-07	4.11441e-06	2.11013e-06	1.06185e-06	4.5965e-07	3.23396e-05	3.07391e-05	2.21144e-05	4.13979e-05	3.30772e-07	2.46337e-07	2.30346e-07	3.7361e-07	1.24592e-07	1.63532e-07	1.23364e-07	1.67158e-07	2.54018e-07	2.91228e-07	3.06572e-07	4.88631e-07		1.42488		1.17934	1.11638		1.33824	1.13685	1.22638	0.886366		1.59138	1.12753	1.81349		1.95554	1.99101	2.06254	1.38645				1.11895	1.29234
1.33466e-07	7.50479e-08	7.11582e-08	8.58727e-08	9.20845e-08	2.42104e-07	3.42009e-06	1.89311e-06	8.88436e-07	6.24507e-07	3.09533e-05	1.99217e-05	3.27888e-05	3.9303e-05	3.80433e-07	1.80957e-07	2.0995e-07	3.86015e-07	1.29274e-07	1.01021e-07	1.17959e-07	1.00752e-07	3.725e-07	2.85876e-07	2.30445e-07	4.88824e-07		1.37458		1.68852	1.34366		1.11241	1.01993	1.0261	1.20427		1.03136	1.67178	1.72172		1.43652	1.81472	2.13102	1.43855				1.64086	1.26859
		1.3553e-07	1.30254e-07	8.69709e-08	2.49866e-07	3.55755e-06	1.75801e-06	9.40854e-07	4.32194e-07	2.01415e-05	2.94741e-05	3.14827e-05	2.63198e-05	2.17834e-07	2.38549e-07	2.42612e-07	3.06653e-07	1.01724e-07	1.2682e-07	8.9856e-08	8.94624e-08	2.79819e-07	3.1295e-07	1.36337e-07	5.19473e-07		1.60622		1.30541	1.26904		1.15712	0.947137	1.08664	0.833422		1.5259	1.60518	1.15297		1.89372	2.09703	1.6929	1.13198				1.2326	1.38873
		8.11966e-08	1.18872e-07	9.94082e-08	2.36136e-07	3.33838e-06	2.11682e-06	8.44397e-07	4.53695e-07	3.14142e-05	2.22167e-05	2.07795e-05	4.1808e-05	3.61535e-07	2.79343e-07	2.41307e-07	4.05327e-07	7.37407e-08	1.485e-07	1.50478e-07	1.66574e-07	3.00322e-07	2.68728e-07	1.76187e-07	5.39811e-07		0.705699		1.98008	1.45052		1.08583	1.14045	0.975237	0.874884		1.15018	1.05947	1.83145		2.21756	2.08575	2.23764	0.820582				1.32292	1.1925
		5.79271e-08	7.59196e-08	7.24547e-08	2.28153e-07	3.75132e-06	1.89115e-06	1.07765e-06	4.59544e-07	2.79237e-05	1.8093e-05	2.1359e-05	4.14865e-05	3.52864e-07	1.95642e-07	2.65381e-07	2.3791e-07	1.20049e-07	1.22282e-07	1.28476e-07	1.15685e-07	2.46755e-07	2.79336e-07	2.89993e-07	4.21303e-07		1.31477		1.80706	1.05723		1.22014	1.01887	1.24463	0.886163		0.936687	1.08902	1.81737		1.55311	2.29383	1.3134	1.33589				1.08696	1.23957
		5.19473e-08	1.07948e-07	1.04372e-07	2.12311e-07	3.53847e-06	1.71423e-06	1.25141e-06	7.11099e-07	1.96833e-05	2.17048e-05	3.75742e-05	2.93851e-05	4.54755e-07	2.58089e-07	2.07546e-07	1.78288e-07	1.04976e-07	1.59337e-07	1.55231e-07	1.24392e-07	3.21399e-07	2.54659e-07	2.3935e-07	4.61911e-07		0.845352		1.15411	1.52295		1.15091	0.923553	1.44531	1.37125		1.12367	1.91577	1.28725		2.04884	1.79393	0.984253	1.16817				1.41576	1.13006
		7.68204e-08	1.22211e-07	6.02085e-08	2.07242e-07	4.01957e-06	1.92431e-06	1.22462e-06	6.75008e-07	1.81863e-05	2.18793e-05	1.79088e-05	2.73449e-05	3.95287e-07	1.84618e-07	1.77542e-07	3.57646e-07	1.01513e-07	1.4557e-07	1.78522e-07	1.91063e-07	2.5382e-07	3.24102e-07	2.5346e-07	5.26168e-07		1.77301		1.641	0.878536		1.30739	1.03673	1.41437	1.30165		1.13271	0.913102	1.19788		1.46559	1.53459	1.97441	1.12964				1.11807	1.43822
		8.56938e-08	1.12343e-07	5.85994e-08	2.8241e-07	4.37254e-06	2.33026e-06	1.05928e-06	4.7797e-07	2.08935e-05	2.49729e-05	2.4039e-05	3.95247e-05	4.13202e-07	1.82682e-07	1.62394e-07	2.23296e-07	1.42514e-07	1.35607e-07	1.26635e-07	1.28134e-07	3.16957e-07	3.34072e-07	2.46531e-07	4.18479e-07		0.949666		1.85781	0.855056		1.4222	1.25545	1.22341	0.921694		1.29286	1.22566	1.73143		1.45022	1.40367	1.23272	1.58588				1.3962	1.48246
		1.11128e-07	9.23164e-08	8.4515e-08	2.38757e-07	3.62522e-06	2.23967e-06	1.10018e-06	5.76834e-07	3.21662e-05	2.55299e-05	2.51123e-05	2.82186e-05	3.65289e-07	2.86648e-07	2.47042e-07	3.19243e-07	1.20027e-07	1.5692e-07	1.32969e-07	1.46333e-07	2.98199e-07	2.903e-07	2.715e-07	4.34422e-07		0.628556		1.7078	1.23321		1.17913	1.20664	1.27066	1.11234		1.3217	1.28038	1.23615		2.27555	2.13533	1.7624	1.33566				1.31356	1.28822
		5.78596e-08	1.08857e-07	1.04e-07	2.84474e-07	3.92278e-06	2.2835e-06	1.09203e-06	6.85435e-07	1.97406e-05	2.11849e-05	2.05336e-05	2.98739e-05	4.05115e-07	1.52955e-07	2.93201e-07	3.56345e-07	1.28023e-07	1.66461e-07	1.27702e-07	1.26287e-07	2.9261e-07	3.16678e-07	2.18513e-07	5.49036e-07		1.74978		1.40337	1.51752		1.27591	1.23025	1.26125	1.32176		1.09676	1.04693	1.30866		1.21423	2.5343	1.96723	1.42463				1.28895	1.40528
		9.82545e-08	9.74305e-08	1.35548e-07	2.75762e-07	3.91802e-06	2.33861e-06	9.99615e-07	4.22378e-07	1.99894e-05	2.12676e-05	2.29635e-05	2.80653e-05	3.00805e-07	2.99524e-07	2.02291e-07	2.204e-07	1.08139e-07	1.11108e-07	1.2435e-07	1.43055e-07	3.7174e-07	3.09424e-07	2.94784e-07	5.91823e-07		0.822622		1.65481	1.97785		1.27436	1.25994	1.15451	0.814494		1.10104	1.17082	1.22944		2.37777	1.74851	1.21673	1.20337				1.63751	1.37308
		8.13361e-08	8.97431e-08	1.36001e-07	2.72888e-07	3.48315e-06	1.92305e-06	1.0827e-06	5.89513e-07	2.54394e-05	2.99395e-05	3.76726e-05	3.43717e-05	3.48994e-07	2.33728e-07	2.30934e-07	3.05491e-07	1.24605e-07	1.64473e-07	1.39795e-07	1.55662e-07	2.50626e-07	2.78846e-07	1.75317e-07	4.82662e-07		1.45564		1.48111	1.98447		1.13292	1.03606	1.25046	1.13679		1.54999	1.92078	1.5057		1.85545	1.9961	1.68648	1.3866				1.10401	1.23739
																													1.36425

## Sheet: v-2
	20211112-3-2		20211112-4-2		20211112-4-4	20211122-2-1		20211122-2-3		20211123-2-1			20211123-2-4			20211124-2-3	20211124-2-4	20211126-2-1	20211126-2-2	20211126-2-3	20211126-2-4	20211130-1	20211130-2	20211130-3	20211130-4		5.15566e-08		6.5782e-08		1.6914e-07	3.07449e-06		8.65837e-07		1.74907e-05			2.28278e-05			1.15693e-07	1.81141e-07	8.98639e-08	1.17903e-07	1.02042e-07	1.14699e-07	2.27015e-07	2.2535e-07
	5.14219e-08		4.1814e-08		1.83055e-07	3.53289e-06		9.46921e-07		1.8765e-05			1.92954e-05			1.12389e-07	2.06088e-07	7.73791e-08	1.13666e-07	1.12748e-07	9.50351e-08	2.31777e-07	2.17839e-07	1.42015e-07	3.62362e-07		0.997388		0.635645		1.08227	1.1491		1.09365		1.07286			0.845261			0.971441	1.13772	0.861071	0.964065	1.10493	0.828559	1.02098	0.966669
	3.60546e-08		5.56288e-08		1.15984e-07	3.01111e-06		8.17061e-07		2.15701e-05			2.81276e-05			9.82127e-08	1.69425e-07	9.3627e-08	1.03827e-07	1.02408e-07	1.28562e-07	2.28363e-07	3.0058e-07	1.70297e-07	3.64498e-07		0.699322		0.845654		0.685728	0.979385		0.943666		1.23323			1.23216			0.848907	0.935325	1.04188	0.880618	1.00359	1.12086	1.00594	1.33384
	3.151e-08		6.957e-08		1.97072e-07	2.59823e-06		7.52469e-07		1.70104e-05			2.82141e-05			1.28265e-07	2.19656e-07	1.0984e-07	1.20979e-07	1.06962e-07	1.3123e-07	2.35017e-07	2.91897e-07	1.36704e-07	4.11839e-07		0.611174		1.05758		1.16514	0.845092		0.869065		0.972537			1.23595			1.10866	1.21262	1.22229	1.02609	1.04822	1.14412	1.03525	1.29531
	5.88004e-08		8.00908e-08		1.83694e-07	2.66689e-06		8.03604e-07		1.32915e-05			2.24605e-05			1.04597e-07	1.28144e-07	7.50811e-08	1.19837e-07	8.86548e-08	1.26556e-07	2.12047e-07	2.202e-07	1.42117e-07	2.62245e-07		1.1405		1.21752		1.08605	0.867423		0.928124		0.759916			0.983911			0.904093	0.707429	0.835498	1.0164	0.868811	1.10337	0.934066	0.977146
	6.35832e-08		8.50359e-08		1.582e-07	3.17137e-06		8.7308e-07		1.41749e-05			2.11432e-05			1.16799e-07	1.44142e-07	9.52836e-08	1.22714e-07	1.15787e-07	9.43547e-08	2.36298e-07	1.71465e-07	1.19541e-07	3.53291e-07		1.23327		1.29269		0.93532	1.03151		1.00837		0.810423			0.926206			1.00956	0.795745	1.06031	1.04081	1.13471	0.822627	1.04089	0.760885
	6.49688e-08		6.32496e-08		2.11244e-07	3.32469e-06		9.75473e-07		1.97452e-05			2.04431e-05			1.04984e-07	2.13364e-07	7.2229e-08	1.19098e-07	7.87966e-08	9.61059e-08	1.96151e-07	1.87685e-07	2.04335e-07	4.88146e-07		1.26015		0.961504		1.24893	1.08138		1.12662		1.1289			0.895534			0.907432	1.17789	0.80376	1.01014	0.772201	0.837894	0.864043	0.832862
	5.13783e-08		6.05828e-08		1.98709e-07	3.23472e-06		9.49003e-07		1.68291e-05			2.42327e-05			1.22083e-07	2.10219e-07	9.45556e-08	1.13477e-07	1.02841e-07	1.27696e-07	2.19374e-07	2.02726e-07	1.31314e-07	2.85112e-07		0.996542		0.920964		1.17482	1.05211		1.09605		0.962169			1.06154			1.05523	1.16053	1.05221	0.962461	1.00783	1.11331	0.966341	0.899608
	5.47352e-08		7.02839e-08		1.05163e-07	3.05604e-06		8.09086e-07		1.85397e-05			1.87057e-05			1.38215e-07	1.58087e-07	1.00916e-07	1.29624e-07	1.08134e-07	1.18054e-07	2.57092e-07	2.10406e-07	1.46806e-07	3.64795e-07		1.06165		1.06844		0.621751	0.993998		0.934456		1.05997			0.819428			1.19467	0.872733	1.12298	1.09941	1.05971	1.02925	1.13249	0.933687
																											0		0		0	0		0		0			0			0	0	0	0	0	0	0	0
																											0		0		0	0		0		0			0			0	0	0	0	0	0	0	0
																											0		0		0	0		0		0			0			0	0	0	0	0	0	0	0
	4.32883e-08		9.02292e-08		2.15688e-07	3.70644e-06		1.22406e-06		3.70904e-05			4.46491e-05			1.65572e-07	2.57712e-07	7.28178e-08	1.98199e-07	1.21917e-07	1.30792e-07	2.43857e-07	2.7709e-07	1.09921e-07	4.35984e-07				1.37164		1.2752	1.20554		1.41373		2.12057			1.95591			1.43113	1.42272	0.810312	1.68104	1.19478	1.1403	1.07419	1.2296
	4.07872e-08		1.26436e-07		2.01582e-07	3.85092e-06		8.83612e-07		1.43636e-05			2.32489e-05			1.91601e-07	2.64582e-07	9.59526e-08	2.29648e-07	1.85457e-07	1.31438e-07	3.0476e-07	3.72922e-07	2.15842e-07	5.45816e-07				1.92205		1.19181	1.25254		1.02053		0.821212			1.01845			1.65612	1.46065	1.06776	1.94778	1.81747	1.14594	1.34247	1.65486
	3.89892e-08		8.34898e-08		2.25426e-07	3.95517e-06		1.03059e-06		1.42557e-05			2.26906e-05			2.57598e-07	1.64677e-07	8.77053e-08	1.21764e-07	1.01623e-07	9.98791e-08	2.80609e-07	2.45362e-07	2.18599e-07	3.81886e-07				1.26919		1.33278	1.28645		1.19029		0.815043			0.99399			2.22656	0.909112	0.97598	1.03275	0.995902	0.870791	1.23608	1.0888
	9.59478e-08		8.20671e-08		2.37285e-07	4.43197e-06		1.09932e-06		1.59416e-05			2.66704e-05			1.1234e-07	2.03936e-07	1.28778e-07	1.35139e-07	1.76668e-07	1.73463e-07	2.51955e-07	2.69203e-07	1.8684e-07	3.61915e-07				1.24756		1.40289	1.44153		1.26966		0.911433			1.16833			0.971016	1.12585	1.43304	1.14619	1.73133	1.51233	1.10986	1.1946
	6.23222e-08		1.38898e-07		2.69727e-07	4.21049e-06		1.15536e-06		2.5209e-05			3.79293e-05			1.74707e-07	2.89566e-07	1.20015e-07	9.4755e-08	1.63161e-07	1.38979e-07	3.76745e-07	3.6609e-07	1.69053e-07	4.08367e-07				2.1115		1.59469	1.36949		1.33439		1.44128			1.66154			1.51009	1.59857	1.33552	0.803671	1.59896	1.21169	1.65956	1.62454
	6.57419e-08		1.00939e-07		1.73692e-07	3.97162e-06		1.06331e-06		1.85268e-05			2.35401e-05			1.64522e-07	2.46999e-07	8.86355e-08	1.59833e-07	1.08183e-07	1.75412e-07	2.47059e-07	2.73993e-07	1.77111e-07	3.8696e-07				1.53445		1.02691	1.2918		1.22807		1.05923			1.0312			1.42205	1.36358	0.986331	1.35563	1.06019	1.52932	1.08829	1.21586
	3.26704e-08		1.18952e-07		2.16269e-07	4.10608e-06		1.1075e-06		2.11491e-05			2.9822e-05			2.64416e-07	1.89631e-07	1.39781e-07	1.42057e-07	2.0464e-07	1.70699e-07	3.55228e-07	2.27847e-07	2.70962e-07	5.15196e-07				1.80828		1.27864	1.33553		1.27911		1.20916			1.30639			2.2855	1.04687	1.55548	1.20487	2.00546	1.48823	1.56478	1.01108
	8.11365e-08		8.8663e-08		1.65768e-07	3.51972e-06		1.01524e-06		2.45478e-05			3.32729e-05			1.25363e-07	2.83744e-07	8.88319e-08	1.61574e-07	1.02312e-07	1.81474e-07	3.77448e-07	3.34648e-07	1.21858e-07	4.61009e-07				1.34783		0.980061	1.14481		1.17256		1.40347			1.45756			1.08358	1.56643	0.988517	1.3704	1.00265	1.58217	1.66266	1.48502
	7.3462e-08		1.02444e-07		1.9939e-07	4.14968e-06		1.0756e-06		2.11861e-05			2.71045e-05			9.94728e-08	2.16705e-07	9.90931e-08	1.84879e-07	1.4703e-07	1.65521e-07	2.78174e-07	3.684e-07	3.23422e-07	4.90905e-07				1.55733		1.17885	1.34971		1.24226		1.21128			1.18735			0.859799	1.19634	1.1027	1.56807	1.44089	1.44308	1.22536	1.63479
	7.08687e-08		7.32235e-08		1.83988e-07	3.38374e-06		1.09416e-06		3.21711e-05			4.41579e-05			2.55985e-07	2.85826e-07	1.05152e-07	2.17685e-07	1.48902e-07	1.48438e-07	3.36615e-07	2.52156e-07	1.67823e-07	3.5312e-07				1.11312		1.08778	1.10059		1.2637		1.83932			1.93439			2.21263	1.57792	1.17012	1.84631	1.45923	1.29415	1.48279	1.11896
	8.28113e-08		9.34733e-08		2.181e-07	3.54404e-06		9.4208e-07		3.39753e-05			4.53912e-05			1.02096e-07	2.44276e-07	9.30067e-08	1.12841e-07	1.13625e-07	1.63205e-07	2.99345e-07	3.2199e-07	1.43668e-07	4.58967e-07				1.42096		1.28947	1.15272		1.08806		1.94247			1.98842			0.882474	1.34854	1.03497	0.957069	1.11352	1.42289	1.31861	1.42885
	3.63834e-08		8.65838e-08		1.83787e-07	3.6346e-06		1.06653e-06		1.90679e-05			2.7422e-05			1.54891e-07	2.46816e-07	1.01831e-07	1.94728e-07	1.59142e-07	1.06297e-07	2.65252e-07	2.92601e-07	2.94833e-07	4.53268e-07				1.31622		1.0866	1.18218		1.23179		1.09017			1.20125			1.33881	1.36257	1.13317	1.6516	1.55959	0.926743	1.16844	1.29843
	6.77848e-08		6.14777e-08		2.02302e-07	3.40705e-06		1.13575e-06		2.89137e-05			3.34993e-05			2.14743e-07	3.53787e-07	7.50556e-08	1.69552e-07	9.99348e-08	1.76937e-07	2.80221e-07	2.24725e-07	2.28625e-07	3.67458e-07				0.934568		1.19606	1.10817		1.31173		1.65309			1.46748			1.85614	1.95311	0.835215	1.43806	0.979355	1.54261	1.23437	0.997229
	4.35834e-08		8.64959e-08		2.83995e-07	3.41704e-06		1.20422e-06		3.09822e-05			3.65822e-05			1.48575e-07	3.63696e-07	1.40937e-07	1.19415e-07	1.10991e-07	1.65813e-07	2.3985e-07	2.95924e-07	2.02554e-07	4.82443e-07		1.86102		1.31489		1.67905	1.11142		1.39082		1.77135			1.60253			1.28422	2.00781	1.56834	1.01283	1.08771	1.44563	1.05654	1.31318
	9.14104e-08		7.96176e-08		2.234e-07	3.416e-06		1.0888e-06		3.00115e-05			3.74906e-05			2.35941e-07	3.68847e-07	1.4398e-07	1.98615e-07	1.30735e-07	1.73293e-07	3.27989e-07	2.1557e-07	2.05375e-07	4.48655e-07		1.20881		1.21033		1.3208	1.11108		1.25751		1.71585			1.64232			2.03937	2.03625	1.6022	1.68457	1.2812	1.51085	1.44479	0.956603
	4.89615e-08		1.27765e-07		1.89823e-07	4.03184e-06		1.1804e-06		2.66773e-05			3.57048e-05			2.19357e-07	3.49178e-07	1.00108e-07	1.83241e-07	1.49236e-07	1.48794e-07	3.65258e-07	3.46561e-07	3.16329e-07	5.11356e-07		1.27514		1.94225		1.12228	1.31138		1.36331		1.52522			1.56409			1.89602	1.92766	1.11399	1.55417	1.46251	1.29726	1.60896	1.53788
	3.24062e-08		1.17399e-07		1.6696e-07	3.35396e-06		1.01636e-06		2.90774e-05			3.59184e-05			2.56054e-07	2.82083e-07	1.09754e-07	2.06641e-07	1.1769e-07	1.78399e-07	2.27987e-07	3.43558e-07	3.37905e-07	5.18268e-07		0.633681		1.78467		0.987108	1.0909		1.17385		1.66244			1.57345			2.21321	1.55726	1.22133	1.75264	1.15335	1.55536	1.00428	1.52455
	9.02126e-08		7.75796e-08		2.26121e-07	3.61344e-06		1.03076e-06		2.01822e-05			3.62701e-05			2.48528e-07	1.89568e-07	9.64669e-08	1.43559e-07	1.84747e-07	1.56611e-07	3.38337e-07	2.46529e-07	2.23612e-07	5.1354e-07		1.57374		1.17934		1.33689	1.1753		1.19048		1.15388			1.58886			2.14816	1.04652	1.07348	1.21761	1.8105	1.3654	1.49038	1.09399
	4.24116e-08		1.11074e-07		2.43734e-07	4.11441e-06		1.06185e-06		3.23396e-05			4.13979e-05			2.30346e-07	3.7361e-07	1.24592e-07	1.63532e-07	1.23364e-07	1.67158e-07	2.54018e-07	2.91228e-07	3.06572e-07	4.88631e-07		1.42488		1.68852		1.44102	1.33824		1.22638		1.84896			1.81349			1.99101	2.06254	1.38645	1.38701	1.20896	1.45736	1.11895	1.29234
	7.50479e-08		8.58727e-08		2.42104e-07	3.42009e-06		8.88436e-07		3.09533e-05			3.9303e-05			2.0995e-07	3.86015e-07	1.29274e-07	1.01021e-07	1.17959e-07	1.00752e-07	3.725e-07	2.85876e-07	2.30445e-07	4.88824e-07		1.37458		1.30541		1.43138	1.11241		1.0261		1.7697			1.72172			1.81472	2.13102	1.43855	0.856819	1.15599	0.878404	1.64086	1.26859
			1.30254e-07		2.49866e-07	3.55755e-06		9.40854e-07		2.01415e-05			2.63198e-05			2.42612e-07	3.06653e-07	1.01724e-07	1.2682e-07	8.9856e-08	8.94624e-08	2.79819e-07	3.1295e-07	1.36337e-07	5.19473e-07		1.60622		1.98008		1.47727	1.15712		1.08664		1.15155			1.15297			2.09703	1.6929	1.13198	1.07563	0.880583	0.779974	1.2326	1.38873
			1.18872e-07		2.36136e-07	3.33838e-06		8.44397e-07		3.14142e-05			4.1808e-05			2.41307e-07	4.05327e-07	7.37407e-08	1.485e-07	1.50478e-07	1.66574e-07	3.00322e-07	2.68728e-07	1.76187e-07	5.39811e-07		0.705699		1.80706		1.39609	1.08583		0.975237		1.79605			1.83145			2.08575	2.23764	0.820582	1.25952	1.47467	1.45227	1.32292	1.1925
			7.59196e-08		2.28153e-07	3.75132e-06		1.07765e-06		2.79237e-05			4.14865e-05			2.65381e-07	2.3791e-07	1.20049e-07	1.22282e-07	1.28476e-07	1.15685e-07	2.46755e-07	2.79336e-07	2.89993e-07	4.21303e-07		1.31477		1.15411		1.3489	1.22014		1.24463		1.59648			1.81737			2.29383	1.3134	1.33589	1.03714	1.25906	1.00859	1.08696	1.23957
			1.07948e-07		2.12311e-07	3.53847e-06		1.25141e-06		1.96833e-05			2.93851e-05			2.07546e-07	1.78288e-07	1.04976e-07	1.59337e-07	1.55231e-07	1.24392e-07	3.21399e-07	2.54659e-07	2.3935e-07	4.61911e-07		0.845352		1.641		1.25523	1.15091		1.44531		1.12535			1.28725			1.79393	0.984253	1.16817	1.35143	1.52126	1.08451	1.41576	1.13006
			1.22211e-07		2.07242e-07	4.01957e-06		1.22462e-06		1.81863e-05			2.73449e-05			1.77542e-07	3.57646e-07	1.01513e-07	1.4557e-07	1.78522e-07	1.91063e-07	2.5382e-07	3.24102e-07	2.5346e-07	5.26168e-07		1.77301		1.85781		1.22527	1.30739		1.41437		1.03977			1.19788			1.53459	1.97441	1.12964	1.23466	1.7495	1.66577	1.11807	1.43822
			1.12343e-07		2.8241e-07	4.37254e-06		1.05928e-06		2.08935e-05			3.95247e-05			1.62394e-07	2.23296e-07	1.42514e-07	1.35607e-07	1.26635e-07	1.28134e-07	3.16957e-07	3.34072e-07	2.46531e-07	4.18479e-07		0.949666		1.7078		1.66968	1.4222		1.22341		1.19455			1.73143			1.40367	1.23272	1.58588	1.15016	1.24101	1.11713	1.3962	1.48246
			9.23164e-08		2.38757e-07	3.62522e-06		1.10018e-06		3.21662e-05			2.82186e-05			2.47042e-07	3.19243e-07	1.20027e-07	1.5692e-07	1.32969e-07	1.46333e-07	2.98199e-07	2.903e-07	2.715e-07	4.34422e-07		0.628556		1.40337		1.41159	1.17913		1.27066		1.83904			1.23615			2.13533	1.7624	1.33566	1.33093	1.30309	1.2758	1.31356	1.28822
			1.08857e-07		2.84474e-07	3.92278e-06		1.09203e-06		1.97406e-05			2.98739e-05			2.93201e-07	3.56345e-07	1.28023e-07	1.66461e-07	1.27702e-07	1.26287e-07	2.9261e-07	3.16678e-07	2.18513e-07	5.49036e-07		1.74978		1.65481		1.68188	1.27591		1.26125		1.12863			1.30866			2.5343	1.96723	1.42463	1.41185	1.25148	1.10103	1.28895	1.40528
			9.74305e-08		2.75762e-07	3.91802e-06		9.99615e-07		1.99894e-05			2.80653e-05			2.02291e-07	2.204e-07	1.08139e-07	1.11108e-07	1.2435e-07	1.43055e-07	3.7174e-07	3.09424e-07	2.94784e-07	5.91823e-07		0.822622		1.48111		1.63038	1.27436		1.15451		1.14286			1.22944			1.74851	1.21673	1.20337	0.94237	1.21862	1.24722	1.63751	1.37308
			8.97431e-08		2.72888e-07	3.48315e-06		1.0827e-06		2.54394e-05			3.43717e-05			2.30934e-07	3.05491e-07	1.24605e-07	1.64473e-07	1.39795e-07	1.55662e-07	2.50626e-07	2.78846e-07	1.75317e-07	4.82662e-07		1.45564		1.36425		1.61338	1.13292		1.25046		1.45445			1.5057			1.9961	1.68648	1.3866	1.39499	1.36998	1.35713	1.10401	1.23739
[truncated: 5 more columns]
