# Supplementary material for: Cholecystokinin modulates age-dependent thalamocortical neuroplasticity
Source: eLife journal article supplement (doi:10.7554/elife.101513), 2024-10-14
Supplement: data1 [file thalamic-cortical L365260.xlsx]

## Sheet: L365260
	210924-1-up-1	210924-1-up-3	210924-1-up-4	210924-3_2-up-1	210924-3_2-up-2	210924-3_2-up-3	210924-3_1-up-4	210924-3_2-down-1	210924-3_5-down-2	210924-3_2-down-3	210924-3_1-down-4	210925-1-up-2	210925-1-up-3	210925-1-up-4	210925-1-down-1	210928-1-1	210929-1-1-2	210929-1-1-3	210929-1-1-4	210929-2-1-2	210929-2-1-3	210929-2-1-4					1.03058e-06	1.20643e-06	1.22639e-06	1.52276e-06	9.81918e-07	1.19945e-06	6.60199e-05	1.63609e-06	1.16126e-06	1.15869e-06	7.56034e-05	1.68353e-06	1.47582e-06	1.21834e-06	6.37425e-05	1.05855e-06	6.46351e-07	8.08112e-07	2.86806e-06	5.24989e-07	6.28365e-07	3.37458e-06	#DIV/0!
	1.12739e-06	1.21237e-06	1.28861e-06	1.47382e-06	9.22282e-07	1.1346e-06	6.41499e-05	1.54434e-06	1.17004e-06	1.10929e-06	7.59498e-05	1.75463e-06	1.52072e-06	1.28911e-06	6.32211e-05	1.16058e-06	5.54523e-07	9.45136e-07	2.84665e-06	5.59818e-07	6.29615e-07	3.44394e-06		n=22			1.09394	1.00492	1.05074	0.967861	0.939266	0.945936	0.971675	0.943926	1.00756	0.957363	1.00458	1.04223	1.03042	1.05809	0.991821	1.09638	0.85793	1.16956	0.992535	1.06634	1.00199	1.02055
	9.74756e-07	1.25857e-06	1.24673e-06	1.55329e-06	8.39089e-07	1.25582e-06	6.62179e-05	1.58729e-06	1.18796e-06	1.20066e-06	7.55608e-05	1.78221e-06	1.52536e-06	1.26401e-06	6.21535e-05	1.08984e-06	5.73126e-07	8.36132e-07	2.76684e-06	5.7077e-07	6.54432e-07	3.24467e-06		N=5			0.945836	1.04322	1.01659	1.02005	0.854541	1.047	1.003	0.970176	1.02299	1.03622	0.999438	1.05861	1.03357	1.03749	0.975072	1.02956	0.886711	1.03467	0.964709	1.0872	1.04148	0.961504
	1.07831e-06	1.24031e-06	1.2799e-06	1.45262e-06	8.89411e-07	1.14653e-06	6.70964e-05	1.59196e-06	1.15706e-06	1.19847e-06	7.45428e-05	1.81853e-06	1.43974e-06	1.27972e-06	6.58531e-05	1.12451e-06	6.2859e-07	9.10716e-07	2.88615e-06	5.44037e-07	6.1956e-07	3.23166e-06					1.04632	1.02809	1.04364	0.95394	0.90579	0.955884	1.01631	0.97303	0.996377	1.03433	0.985973	1.08019	0.975551	1.05039	1.03311	1.06231	0.972521	1.12697	1.00631	1.03628	0.985988	0.957648
	1.165e-06	1.22331e-06	1.27028e-06	1.57713e-06	1.02963e-06	1.11621e-06	6.3774e-05	1.61721e-06	1.18023e-06	1.12534e-06	7.54508e-05	1.60766e-06	1.52731e-06	1.11881e-06	5.97523e-05	1.07648e-06	7.39983e-07	7.19202e-07	2.88153e-06	5.24155e-07	7.11257e-07	3.27469e-06					1.13043	1.014	1.03579	1.0357	1.04859	0.930604	0.965981	0.988461	1.01633	0.971215	0.997982	0.954933	1.03489	0.918314	0.937401	1.01694	1.14486	0.889978	1.0047	0.998412	1.13192	0.9704
	9.25531e-07	1.1316e-06	1.15567e-06	1.50707e-06	9.93819e-07	1.25522e-06	6.76374e-05	1.68263e-06	1.11314e-06	1.18589e-06	7.58451e-05	1.70502e-06	1.42759e-06	1.28615e-06	6.62602e-05	1.16375e-06	7.27792e-07	8.58497e-07	2.87401e-06	4.39218e-07	5.48714e-07	3.42692e-06					0.898071	0.937974	0.942337	0.989697	1.01212	1.0465	1.0245	1.02845	0.958555	1.02348	1.0032	1.01277	0.967319	1.05566	1.0395	1.09938	1.126	1.06235	1.00207	0.836622	0.873241	1.01551
	1.05008e-06	1.17513e-06	1.19227e-06	1.59551e-06	1.01601e-06	1.24294e-06	6.72433e-05	1.65799e-06	1.16348e-06	1.11409e-06	7.39446e-05	1.59998e-06	1.58385e-06	1.17428e-06	6.53364e-05	8.63346e-07	7.37565e-07	7.84408e-07	2.91769e-06	5.40227e-07	5.55787e-07	3.44984e-06					1.01893	0.974055	0.972181	1.04777	1.03472	1.03626	1.01853	1.01339	1.00191	0.961504	0.97806	0.950371	1.07319	0.963841	1.02501	0.81559	1.14112	0.970667	1.0173	1.02902	0.884497	1.0223
	9.74043e-07	1.18164e-06	1.13031e-06	1.42846e-06	1.04986e-06	1.1747e-06	6.54736e-05	1.71971e-06	1.16675e-06	1.16258e-06	7.74266e-05	1.60404e-06	1.35803e-06	1.11849e-06	6.42876e-05	1.09217e-06	5.98437e-07	6.53062e-07	2.84956e-06	5.55442e-07	6.74288e-07	3.50495e-06					0.945144	0.979451	0.921654	0.938069	1.06919	0.979369	0.991725	1.05111	1.00472	1.00335	1.02412	0.952783	0.920183	0.918047	1.00855	1.03176	0.92587	0.808133	0.99355	1.05801	1.07308	1.03863
	9.49505e-07	1.22849e-06	1.24733e-06	1.5942e-06	1.11524e-06	1.26956e-06	6.65669e-05	1.68756e-06	1.15147e-06	1.17322e-06	7.61064e-05	1.59618e-06	1.42399e-06	1.2161e-06	6.30755e-05	8.97739e-07	6.1079e-07	7.57746e-07	2.92205e-06	4.66248e-07	6.33267e-07	3.41997e-06					0.921334	1.01829	1.01708	1.04691	1.13578	1.05845	1.00828	1.03146	0.991563	1.01254	1.00665	0.948115	0.964879	0.998168	0.989536	0.848081	0.944983	0.937674	1.01883	0.888109	1.0078	1.01345
																											0.982781	0.984754	0.977808	1.01163	1.06008	1.01024	1.0018	1.02257	0.994616	0.994418	1.002	0.963793	0.992092	0.970807	0.999999	0.96235	1.05657	0.93376	1.00729	0.962035	0.994108	1.01206
	1.21768e-06	1.78376e-06	1.88906e-06	1.50996e-06	1.07001e-06	1.10802e-06	6.13534e-05	2.18271e-06	1.10707e-06	1.56341e-06	9.69115e-05	1.53064e-06	1.23944e-06	1.05118e-06	6.23642e-05		6.98114e-07	8.90916e-07	2.49362e-06	4.95836e-07	5.49763e-07	3.25126e-06					1.18155	1.47855	1.54035	0.991593	1.08971	0.923777	0.929317	1.3341	0.953333	1.34929	1.28184	0.909185	0.83983	0.862798	0.978378		1.08008	1.10247	0.869447	0.944469	0.874911	0.963454
	1.13223e-06	1.56222e-06	1.61714e-06	1.4897e-06	1.03768e-06	1.17076e-06	6.3235e-05	2.11535e-06	1.20746e-06	1.87537e-06	9.87493e-05	1.44787e-06	1.43765e-06	1.03301e-06	5.94054e-05		7.09104e-07	7.38005e-07	2.55443e-06	5.29825e-07	6.74066e-07	3.21514e-06					1.09863	1.29492	1.31862	0.978288	1.05679	0.976081	0.957817	1.29294	1.03978	1.61852	1.30615	0.860021	0.974131	0.847889	0.93196		1.09709	0.913245	0.890647	1.00921	1.07273	0.952753
	1.04408e-06	1.81304e-06	1.32585e-06	1.50975e-06	1.00248e-06	1.14248e-06	6.75919e-05	2.00908e-06	1.20584e-06	1.72309e-06	9.00086e-05	1.40444e-06	1.28423e-06	1.07667e-06	5.8115e-05		7.31952e-07	6.78234e-07	2.61451e-06	5.13265e-07	6.24138e-07	3.30188e-06					1.0131	1.50282	1.0811	0.991455	1.02094	0.952506	1.02381	1.22798	1.03839	1.48709	1.19054	0.834222	0.870179	0.883723	0.911715		1.13244	0.839282	0.911596	0.977667	0.993273	0.978456
	9.71486e-07	1.56145e-06	1.39704e-06	1.43319e-06	9.94667e-07	1.05106e-06	7.13046e-05	1.61846e-06	1.17772e-06	1.62092e-06	8.33821e-05	1.6607e-06	1.23901e-06	1.03897e-06	5.75751e-05		6.51922e-07	6.57171e-07	2.5251e-06	4.27391e-07	7.32035e-07	3.46643e-06					0.942662	1.29428	1.13915	0.941175	1.01298	0.876285	1.08005	0.989226	1.01417	1.39892	1.10289	0.986437	0.839539	0.852782	0.903245		1.00862	0.813218	0.880422	0.814095	1.16498	1.02722
	8.93429e-07	1.40947e-06	1.29576e-06	1.43015e-06	9.12685e-07	1.26567e-06	6.66808e-05	1.89379e-06	1.09804e-06	1.32353e-06	8.85317e-05	1.51621e-06	1.38665e-06	9.85874e-07	5.92633e-05		5.5159e-07	7.04151e-07	2.81442e-06	4.99118e-07	5.02997e-07	3.55509e-06					0.866922	1.1683	1.05656	0.93918	0.929493	1.05521	1.01001	1.15751	0.945559	1.14226	1.171	0.900612	0.939578	0.809198	0.92973		0.853392	0.871353	0.981299	0.950721	0.800486	1.05349
	9.10823e-07	1.56671e-06	1.25741e-06	1.61077e-06	9.71631e-07	1.17087e-06	6.61073e-05	1.69571e-06	1.21327e-06	1.2885e-06	8.4382e-05	1.821e-06	1.32535e-06	1.05777e-06	6.16321e-05		7.19918e-07	8.34978e-07	2.62926e-06	4.28269e-07	6.18608e-07	3.69248e-06					0.883799	1.29863	1.0253	1.0578	0.989524	0.976172	1.00132	1.03645	1.04479	1.11203	1.11611	1.08165	0.898039	0.868206	0.966893		1.11382	1.03325	0.916738	0.815768	0.984472	1.0942
	8.46452e-07	1.31368e-06	1.34198e-06	1.60109e-06	1.16018e-06	1.15324e-06	6.49135e-05	1.63723e-06	1.12403e-06	1.27542e-06	8.43611e-05	1.65576e-06	1.23497e-06	1.08811e-06	6.18149e-05		6.74758e-07	8.35872e-07	2.81616e-06	4.51507e-07	6.71533e-07	3.61354e-06					0.821338	1.0889	1.09426	1.05144	1.18154	0.961477	0.983242	1.0007	0.967933	1.10074	1.11584	0.983504	0.836797	0.893115	0.96976		1.04395	1.03435	0.981905	0.860031	1.0687	1.07081
	8.83643e-07	1.37712e-06	1.32863e-06	1.66289e-06	1.02161e-06	1.17029e-06	6.34647e-05	1.7541e-06	1.15977e-06	1.11881e-06	8.74437e-05	1.47588e-06	1.32409e-06	1.09534e-06	6.07535e-05		6.31795e-07	8.56387e-07	2.70201e-06	4.99627e-07	5.62171e-07	3.60374e-06					0.857426	1.14149	1.08337	1.09202	1.04042	0.975693	0.961296	1.07213	0.99871	0.965583	1.15661	0.876656	0.897184	0.899049	0.953109		0.97748	1.05974	0.942104	0.95169	0.894657	1.06791
	7.895e-07	1.55374e-06	1.21686e-06	1.56461e-06	1.05813e-06	1.29224e-06	6.62709e-05	1.7045e-06	1.12486e-06	1.26349e-06	8.6676e-05	1.72512e-06	1.22684e-06	1.02025e-06	6.27765e-05		6.70629e-07	8.50323e-07	2.89416e-06	4.83567e-07	6.11196e-07	3.7825e-06					0.766076	1.28789	0.992235	1.02748	1.07761	1.07736	1.0038	1.04182	0.968651	1.09044	1.14646	1.0247	0.831288	0.837412	0.984847		1.03756	1.05223	1.0091	0.9211	0.972677	1.12088
	8.36422e-07	1.33372e-06	1.1002e-06	1.68409e-06	1.14219e-06	1.08779e-06	6.80262e-05	1.62295e-06	1.27648e-06	1.15379e-06	8.80812e-05	1.68535e-06	1.35711e-06	1.01948e-06	5.9311e-05		7.22354e-07	8.88406e-07	2.86987e-06	5.15798e-07	5.32931e-07	3.53312e-06					0.811606	1.10552	0.89711	1.10594	1.16323	0.906907	1.03039	0.991971	1.09921	0.995771	1.16504	1.00108	0.919561	0.836781	0.930479		1.11759	1.09936	1.00063	0.982493	0.848124	1.04698
	8.41881e-07	1.34305e-06	1.14155e-06	1.67922e-06	1.14031e-06	1.17577e-06	7.54978e-05	1.8432e-06	1.12632e-06	1.19282e-06	8.74778e-05	1.50681e-06	1.36281e-06	1.05862e-06	6.88791e-05	9.10025e-07	6.81187e-07	8.20723e-07	2.5904e-06	5.09029e-07	6.37086e-07	3.77151e-06					0.816903	1.11324	0.930826	1.10275	1.16131	0.980255	1.14356	1.12659	0.969908	1.02945	1.15706	0.89503	0.923424	0.868911	1.08058	0.859688	1.0539	1.0156	0.903191	0.969598	1.01388	1.11762
	7.31776e-07	1.42767e-06	1.10588e-06	1.66471e-06	1.16249e-06	1.24192e-06	7.78267e-05	1.65959e-06	1.09781e-06	1.20587e-06	8.79951e-05	1.49937e-06	1.3333e-06	1.04304e-06	6.14166e-05	1.20283e-06	5.93746e-07	9.18121e-07	2.8472e-06	4.80473e-07	6.28407e-07	3.74462e-06					0.710064	1.18339	0.901737	1.09322	1.1839	1.03541	1.17884	1.01437	0.945354	1.04071	1.1639	0.890611	0.903424	0.856115	0.963512	1.1363	0.918613	1.13613	0.992726	0.915206	1.00007	1.10965
	7.56811e-07	1.1233e-06	1.00528e-06	1.68562e-06	1.00742e-06	1.16888e-06	7.07705e-05	1.82439e-06	1.24788e-06	1.36524e-06	8.5004e-05	1.43857e-06	1.31374e-06	1.11042e-06	6.58676e-05	9.19165e-07	6.11898e-07	9.15307e-07	2.81061e-06	4.66545e-07	5.4982e-07	3.85791e-06					0.734356	0.931096	0.819709	1.10695	1.02597	0.97451	1.07196	1.11509	1.07459	1.17826	1.12434	0.854497	0.890171	0.911426	1.03334	0.868322	0.946696	1.13265	0.979969	0.888676	0.875	1.14322
	8.95299e-07	1.26165e-06	1.10108e-06	1.62559e-06	1.03608e-06	1.163e-06	7.09629e-05	1.74692e-06	1.18299e-06	1.32327e-06	8.48029e-05	1.66323e-06	1.25424e-06	9.70716e-07	6.37383e-05	1.0124e-06	6.36603e-07	7.6514e-07	2.9639e-06	4.26137e-07	6.56122e-07	3.89193e-06					0.868736	1.04578	0.897825	1.06753	1.05516	0.969612	1.07487	1.06774	1.0187	1.14204	1.12168	0.987941	0.84986	0.796756	0.999934	0.9564	0.984918	0.946825	1.03342	0.811707	1.04417	1.15331
	9.76594e-07	1.3118e-06	1.17567e-06	1.65808e-06	9.76845e-07	1.18527e-06	6.99553e-05	1.73174e-06	1.1654e-06	1.41646e-06	8.72986e-05	1.69716e-06	1.29032e-06	9.83317e-07	6.85728e-05	9.31704e-07	6.69109e-07	9.26823e-07	3.09002e-06	4.87393e-07	6.29435e-07	3.91524e-06					0.947619	1.08735	0.958647	1.08886	0.994833	0.98818	1.05961	1.05846	1.00356	1.22247	1.15469	1.00809	0.874302	0.807098	1.07578	0.880168	1.03521	1.1469	1.07739	0.928386	1.0017	1.16022
	8.90524e-07	1.28051e-06	1.43119e-06	1.75576e-06	1.04625e-06	1.19505e-06	7.74511e-05	1.69885e-06	1.12639e-06	1.4621e-06	8.29325e-05	1.69597e-06	1.22514e-06	1.11721e-06	6.59663e-05	9.75211e-07	7.58149e-07	9.05996e-07	2.84891e-06	4.43073e-07	6.60924e-07	3.86e-06					0.864103	1.0614	1.167	1.15301	1.06551	0.996333	1.17315	1.03836	0.96997	1.26185	1.09694	1.00739	0.830139	0.916993	1.03489	0.921269	1.17297	1.12113	0.993323	0.843966	1.05182	1.14385
	9.51313e-07	1.2059e-06	9.91193e-07	1.54434e-06	1.02868e-06	1.15662e-06	7.38122e-05	1.7562e-06	1.24566e-06	1.11315e-06	8.52958e-05	1.56847e-06	1.30921e-06	9.72419e-07	6.26858e-05	9.68242e-07	7.00797e-07	8.09763e-07	2.9493e-06	5.3919e-07	6.81315e-07	3.80098e-06					0.923088	0.99956	0.808221	1.01417	1.04763	0.964292	1.11803	1.07342	1.07268	0.960697	1.1282	0.931655	0.887105	0.798154	0.983423	0.914685	1.08424	1.00204	1.02833	1.02705	1.08427	1.12636
	8.24186e-07	1.04372e-06	1.06518e-06	1.58729e-06	1.03132e-06	1.35695e-06	7.41512e-05	1.57696e-06	1.18138e-06	1.17383e-06	8.79084e-05	1.55402e-06	1.49144e-06	1.0776e-06	6.16115e-05	8.78306e-07	6.67516e-07	8.29986e-07	2.98551e-06	5.04007e-07	6.2745e-07	3.81847e-06					0.799733	0.86513	0.868548	1.04238	1.05031	1.13131	1.12316	0.963863	1.01732	1.01306	1.16276	0.92307	1.01058	0.884486	0.966569	0.829723	1.03275	1.02707	1.04095	0.960034	0.998543	1.13154
	8.43782e-07	1.0315e-06	9.19097e-07	1.59196e-06	1.09791e-06	1.10929e-06	7.66063e-05	1.84614e-06	1.0964e-06	1.27995e-06	8.32669e-05	1.54269e-06	1.40776e-06	1.18391e-06	5.90197e-05	1.00561e-06	6.80062e-07	8.79535e-07	2.92762e-06	4.68744e-07	5.47695e-07	3.84701e-06					0.818747	0.855004	0.749434	1.04544	1.11813	0.924832	1.16035	1.12839	0.944146	1.10465	1.10136	0.916344	0.953878	0.971743	0.925908	0.949981	1.05216	1.08838	1.02077	0.892863	0.871619	1.14
	8.72693e-07	9.31847e-07	1.08855e-06	1.61721e-06	1.08585e-06	1.23036e-06	7.47684e-05	1.92234e-06	1.21241e-06	1.34114e-06	7.90714e-05	1.40112e-06	1.39397e-06	1.19548e-06	6.27399e-05	1.00855e-06	6.1983e-07	9.93796e-07	2.99558e-06	5.03473e-07	6.27501e-07	3.84682e-06					0.846801	0.772403	0.887608	1.06202	1.10585	1.02577	1.13251	1.17496	1.04404	1.15746	1.04587	0.832251	0.944537	0.981243	0.984272	0.95276	0.958968	1.22978	1.04446	0.959015	0.998625	1.13994
	7.91715e-07	1.14274e-06	8.26374e-07	1.68263e-06	9.89858e-07	1.20066e-06	7.63555e-05	1.69391e-06	1.08454e-06	1.18418e-06	8.21258e-05	1.47914e-06	1.42978e-06	1.06832e-06	6.29325e-05	8.70598e-07	6.62641e-07	1.05337e-06	3.06454e-06	5.33886e-07	6.36848e-07	3.94903e-06					0.768225	0.947211	0.673828	1.10499	1.00809	1.00101	1.15655	1.03534	0.933933	1.02199	1.08627	0.878596	0.968803	0.876869	0.987293	0.822442	1.0252	1.30349	1.06851	1.01695	1.0135	1.17023
	8.48484e-07	1.07842e-06	1.03897e-06	1.53526e-06	9.59208e-07	1.28517e-06	7.69564e-05	1.67954e-06	1.21353e-06	1.44212e-06	7.89381e-05	1.44363e-06	1.36849e-06	1.21107e-06	6.3562e-05	1.03013e-06	5.90637e-07	9.39283e-07	3.05273e-06	5.2675e-07	7.51161e-07	3.71771e-06					0.82331	0.893897	0.847182	1.00821	0.976872	1.07147	1.16565	1.02656	1.04501	1.24461	1.04411	0.8575	0.927271	0.994034	0.997169	0.973147	0.913802	1.16232	1.06439	1.00335	1.19542	1.10168
	8.79915e-07	1.04202e-06	9.54798e-07	1.57943e-06	1.02934e-06	1.19847e-06	7.59498e-05	1.62893e-06	1.08601e-06	1.26274e-06	8.57674e-05	1.48691e-06	1.366e-06	1.08084e-06	6.22968e-05	8.72186e-07	7.59494e-07	9.27952e-07	2.93223e-06	4.99123e-07	7.25576e-07	3.87574e-06					0.853809	0.863727	0.778545	1.03721	1.04829	0.999181	1.15041	0.995625	0.935194	1.0898	1.13444	0.883212	0.925585	0.887142	0.97732	0.823942	1.17505	1.1483	1.02237	0.950731	1.1547	1.14851
	7.6506e-07	9.05631e-07	9.58327e-07	1.65799e-06	8.82999e-07	1.12534e-06	7.55608e-05	1.61356e-06	1.14576e-06	1.25256e-06	8.22797e-05	1.81854e-06	1.32427e-06	1.05632e-06	5.91021e-05	9.29568e-07	6.87463e-07	9.4092e-07	3.01041e-06	5.33216e-07	7.07079e-07	3.95571e-06					0.742361	0.750673	0.781423	1.0888	0.89926	0.938214	1.14452	0.986233	0.986647	1.08101	1.08831	1.08019	0.897311	0.867022	0.927201	0.87815	1.06361	1.16434	1.04963	1.01567	1.12527	1.17221
	8.5753e-07	9.01091e-07	8.95616e-07	1.71971e-06	9.9199e-07	1.18589e-06	7.45428e-05	1.64626e-06	1.1603e-06	1.32666e-06	8.0411e-05	1.54652e-06	1.34123e-06	1.20111e-06	6.24051e-05	7.40303e-07	7.12346e-07	7.60215e-07	3.08016e-06	5.75304e-07	5.92328e-07	3.98078e-06					0.832087	0.746909	0.730287	1.12934	1.01026	0.988699	1.1291	1.00622	0.999169	1.14496	1.06359	0.918618	0.9088	0.985863	0.979019	0.699354	1.1021	0.940729	1.07395	1.09584	0.942649	1.17964
	7.61131e-07	8.88205e-07	9.03299e-07	1.6031e-06	1.20441e-06	1.11409e-06	7.54508e-05	1.87249e-06	1.25346e-06	1.41033e-06	8.3195e-05	1.43396e-06	1.35225e-06	1.15265e-06	6.28704e-05	1.07001e-06	7.20882e-07	8.78341e-07	3.03309e-06	4.79904e-07	6.23438e-07	4.02381e-06					0.738548	0.736228	0.736552	1.05276	1.22659	0.928833	1.14285	1.14449	1.07939	1.21718	1.10041	0.85176	0.916264	0.946086	0.986319	1.01082	1.11531	1.0869	1.05754	0.914121	0.99216	1.19239
	9.33938e-07	8.54518e-07	8.42565e-07	1.68756e-06	1.19111e-06	1.16258e-06	7.58451e-05	1.67699e-06	1.24627e-06	1.18653e-06	8.52804e-05	1.50763e-06	1.25698e-06	1.07663e-06	6.03358e-05	8.56708e-07	6.47711e-07	1.0058e-06	2.97577e-06	5.51815e-07	6.24031e-07	3.98859e-06					0.906229	0.708305	0.68703	1.10822	1.21305	0.96926	1.14882	1.025	1.0732	1.02403	1.128	0.895517	0.851712	0.883691	0.946556	0.80932	1.0021	1.24463	1.03756	1.0511	0.993102	1.18195
	8.99107e-07	8.82403e-07	8.52737e-07	1.56288e-06	9.47502e-07	1.17322e-06	7.39446e-05	1.75541e-06	1.15399e-06	1.40506e-06	8.24624e-05	1.47281e-06	1.3125e-06	1.07165e-06	6.17946e-05	1.04597e-06	6.14943e-07	7.88166e-07	3.09237e-06	5.3428e-07	5.95566e-07	3.98584e-06					0.872431	0.731419	0.695324	1.02635	0.964951	0.978135	1.12003	1.07293	0.993732	1.21262	1.09072	0.874832	0.889334	0.879598	0.969441	0.98811	0.951407	0.975317	1.07821	1.0177	0.947803	1.18113
	1.10018e-06	9.1462e-07	9.2238e-07	1.545e-06	1.11986e-06	1.08641e-06	7.74266e-05	2.009e-06	1.13799e-06	1.57891e-06	8.44695e-05	1.46304e-06	1.2834e-06	1.03273e-06	6.07863e-05	9.71007e-07	7.39949e-07	9.57385e-07	3.07276e-06	5.18053e-07	7.58557e-07	4.03829e-06					1.06754	0.758123	0.752111	1.0146	1.14049	0.90576	1.17278	1.22793	0.979956	1.36267	1.11727	0.869031	0.869617	0.847658	0.953624	0.917297	1.14481	1.18472	1.07137	0.986787	1.20719	1.19668
	7.53284e-07	1.01763e-06	8.53448e-07	1.52522e-06	1.02707e-06	1.35804e-06	7.61064e-05	1.93442e-06	1.16067e-06	1.36676e-06	8.24685e-05	1.56404e-06	1.37365e-06	1.03696e-06	5.96106e-05	9.3593e-07	6.56759e-07	8.91067e-07	3.11497e-06	5.77324e-07	6.4401e-07	4.06118e-06					0.730934	0.843508	0.695904	1.00161	1.04599	1.13222	1.15278	1.18235	0.999488	1.17957	1.0908	0.929023	0.930769	0.851132	0.93518	0.88416	1.0161	1.10265	1.08609	1.09969	1.0249	1.20346
																											0.863137	0.755517	0.713384	1.04071	1.11821	0.982841	1.14745	1.13054	1.02515	1.19921	1.10544	0.884033	0.891539	0.881633	0.958224	0.921941	1.04595	1.11884	1.06615	1.01388	1.03303	1.19112
[truncated: 5 more columns]

## Sheet: ACSF
	210924-1-down-1	210924-1-down-3	210924-2-1	210924-2-3	210924-2-4	210925-2-1	210928-1-4	210929-3-3-1	210929-3-4-2	210929-3-1-3	210929-4-3-1	210929-4-2-1	210924-2-4-2														6.15826e-07	7.06142e-07	6.84377e-07	8.81785e-07		3.92573e-07	7.27553e-07	2.41478e-07	1.22215e-06	1.65575e-06	5.86254e-07	9.9106e-05	8.73031e-05
	5.81304e-07	6.85289e-07	8.14292e-07	9.0248e-07	1.02597e-06	4.08904e-07	7.39746e-07	2.31741e-07	1.23849e-06	1.69301e-06	5.94144e-07	0.000104855	9.51832e-05		n=12												0.943941	0.970469	1.18983	1.02347		1.0416	1.01676	0.959677	1.01337	1.0225	1.01346	1.058	1.09026
	6.86625e-07	7.43541e-07	7.02763e-07	9.21897e-07	9.19406e-07	3.50058e-07	7.24875e-07	2.02978e-07	1.1937e-06	1.61041e-06	6.03835e-07	0.000104674	8.54239e-05		N=5												1.11497	1.05296	1.02687	1.04549		0.891702	0.996318	0.840564	0.976722	0.972618	1.02999	1.05618	0.978475
	6.35284e-07	7.01131e-07	5.66353e-07	7.66184e-07	9.04938e-07	4.00311e-07	7.74651e-07	2.10222e-07	1.20484e-06	1.60373e-06	5.64378e-07	0.000102299	7.74826e-05														1.0316	0.992905	0.827546	0.868901		1.01971	1.06473	0.870561	0.985837	0.968583	0.962684	1.03222	0.887512
	6.61727e-07	6.27324e-07	7.66739e-07	8.85383e-07	7.98344e-07	3.51948e-07	7.8029e-07	2.4536e-07	1.1952e-06	1.68586e-06	5.96288e-07	9.9857e-05	8.81036e-05														1.07453	0.888383	1.12035	1.00408		0.896516	1.07249	1.01608	0.977951	1.01818	1.01711	1.00758	1.00917
	5.81709e-07	7.04125e-07	6.36248e-07	8.90295e-07	8.20687e-07	4.29887e-07	7.52058e-07	2.53846e-07	1.26634e-06	1.66832e-06	6.08459e-07	0.000102041	9.12706e-05														0.9446	0.997145	0.929675	1.00965		1.09505	1.03368	1.05122	1.03616	1.00759	1.03788	1.02961	1.04544
	4.99964e-07	7.52268e-07	7.44265e-07	8.89003e-07	1.0352e-06	4.2801e-07	7.3159e-07	2.70482e-07	1.23502e-06	1.71428e-06	5.45537e-07	0.000100239	8.62095e-05														0.811859	1.06532	1.08751	1.00819		1.09027	1.00555	1.12011	1.01053	1.03535	0.930547	1.01144	0.987473
	6.76838e-07	6.74614e-07	5.54617e-07	9.42426e-07	9.81461e-07	3.83961e-07	6.69673e-07	2.95472e-07	1.189e-06	1.59064e-06	5.99074e-07	9.06278e-05	8.61521e-05														1.09907	0.955352	0.810397	1.06877		0.978064	0.920445	1.2236	0.972879	0.960676	1.02187	0.914452	0.986815
	6.03159e-07	7.60841e-07	6.89739e-07	8.5661e-07	9.36138e-07	3.87505e-07	6.47545e-07	2.21725e-07	1.25459e-06	1.67976e-06	5.78319e-07	8.82558e-05	8.85997e-05														0.97943	1.07746	1.00783	0.97145		0.987089	0.890031	0.918198	1.02655	1.0145	0.986464	0.890519	1.01485
																											0.981899	0.996733	0.991152	1.01243		1.0094	0.984438	1.06584	1.00481	1.00726	0.998774	0.970719	1.00875
	1.22708e-06	1.37172e-06	1.1943e-06	1.27999e-06	1.17617e-06	5.98416e-07	6.06545e-07	1.41975e-07	1.60712e-06	1.80661e-06	7.93688e-07	0.000132347	0.000114143														1.99257	1.94255	1.74509	1.4516		1.52434	0.833678	0.587942	1.315	1.09111	1.35383	1.33541	1.30743
	8.50061e-07	1.21792e-06	1.17983e-06	1.09229e-06	1.07611e-06	5.42685e-07	5.98812e-07	2.93865e-07	1.63803e-06	1.7813e-06	7.32362e-07	0.000127243	0.000119975														1.38036	1.72475	1.72395	1.23873		1.38238	0.823049	1.21694	1.34029	1.07583	1.24922	1.28391	1.37423
	7.38131e-07	1.10706e-06	9.52419e-07	1.19604e-06	1.0998e-06	5.00182e-07	6.99717e-07	3.82448e-07	1.63928e-06	1.78426e-06	7.1759e-07	0.000121372	0.000113646														1.1986	1.56776	1.39166	1.35639		1.27411	0.96174	1.58378	1.34131	1.07761	1.22402	1.22467	1.30174
	7.20071e-07	8.93735e-07	8.62299e-07	1.05571e-06	1.09215e-06	5.26414e-07	5.98437e-07	4.42849e-07	1.74926e-06	1.88095e-06	7.4471e-07	0.000119892	0.000116106														1.16928	1.26566	1.25998	1.19724		1.34093	0.822534	1.83391	1.4313	1.13601	1.27028	1.20974	1.32992
	6.13563e-07	8.43069e-07	9.47522e-07	1.10188e-06	1.00575e-06	4.70645e-07	7.54072e-07	3.58652e-07	1.70302e-06	2.15373e-06	7.21418e-07	0.00011439	0.000121417														0.996326	1.19391	1.3845	1.2496		1.19887		1.48524	1.39347	1.30076	1.23056	1.15422	1.39075
	8.28662e-07	8.0573e-07	9.25289e-07	1.09137e-06	1.07792e-06	3.98572e-07	6.43415e-07	2.77488e-07	1.6598e-06	2.25401e-06	7.03702e-07	0.00010949	0.000127604														1.34561	1.14103	1.35202	1.23769		1.01528		1.14912	1.3581	1.36132	1.20034	1.10478	1.46162
	5.69446e-07	8.02813e-07	9.88082e-07	1.12146e-06	1.15149e-06	4.33464e-07	9.22479e-07	3.28529e-07	1.63898e-06	2.10805e-06	6.65126e-07	0.00010663	0.000116263														0.924686	1.1369	1.44377	1.27181		1.10416		1.36049	1.34106	1.27317	1.13453	1.07592	1.33171
	7.84448e-07	7.02281e-07	8.67556e-07	1.095e-06	1.08391e-06	4.8817e-07	7.56171e-07	3.11735e-07	1.55075e-06	1.96536e-06	6.89432e-07	0.00010906	0.000111586														1.27381	0.994533	1.26766	1.2418		1.24351		1.29095	1.26888	1.18699	1.17599	1.10044	1.27815
	6.37352e-07	8.59785e-07	8.29302e-07	9.72562e-07	1.20287e-06	5.06239e-07	7.28697e-07	2.76327e-07	1.61865e-06	2.30524e-06	6.53097e-07	0.000120075	0.000112725														1.03495	1.21758	1.21176	1.10295		1.28954		1.14432	1.32443	1.39226	1.11402	1.21158	1.29119
	6.75711e-07	8.24653e-07	9.9978e-07	9.80671e-07	1.02126e-06	4.66984e-07	8.15155e-07	3.04934e-07	1.51962e-06	2.33319e-06	8.1209e-07	0.000109448	0.000117466														1.09724	1.16783	1.46086	1.11214		1.18955		1.26278	1.2434	1.40914	1.38522	1.10436	1.3455
	7.03309e-07	9.66558e-07	1.08405e-06	1.1048e-06	1.18365e-06	4.01098e-07	5.84e-07	2.34164e-07	1.60399e-06	1.95076e-06	6.87767e-07	0.000101754	0.00012697														1.14206	1.36879	1.584	1.25292		1.02172		0.969711	1.31244	1.17817	1.17316	1.02671	1.45436
	8.99861e-07	6.98677e-07	9.10391e-07	1.08687e-06	1.08271e-06	4.41732e-07	6.37184e-07	3.30822e-07	1.62801e-06	2.21505e-06	6.80348e-07	0.000113796	0.000123376														1.46123	0.98943	1.33025	1.23258		1.12522		1.36999	1.33209	1.33779	1.1605	1.14822	1.41319
	5.63937e-07	8.04113e-07	1.00104e-06	1.08464e-06	1.01583e-06	4.04311e-07	7.38077e-07	3.45661e-07	1.70264e-06	2.3915e-06	7.32992e-07	0.000107711	0.000124757														0.91574	1.13874	1.4627	1.23005		1.0299		1.43144	1.39315	1.44436	1.2503	1.08682	1.42901
	5.16175e-07	7.5107e-07	8.42385e-07	1.01309e-06	9.42205e-07	5.02299e-07		3.38584e-07	1.72238e-06	2.55631e-06	7.16378e-07	0.000109495	0.000107619														0.838183	1.06363	1.23088	1.14891		1.27951		1.40213	1.40931	1.54389	1.22196	1.10482	1.2327
	6.29297e-07	7.64117e-07	8.91121e-07	1.1927e-06	1.16535e-06	4.39879e-07	7.35229e-07	3.1741e-07	1.7532e-06	2.29451e-06	7.54927e-07	0.000106032	0.000119346														1.02187	1.0821	1.30209	1.3526		1.1205		1.31445	1.43452	1.38578	1.28771	1.06988	1.36703
	7.36039e-07	7.87149e-07	8.00017e-07	1.02589e-06	1.08954e-06	4.69111e-07	6.02961e-07	3.54992e-07	1.64246e-06	2.84858e-06	6.86266e-07	0.000109412	0.000122357														1.19521	1.11472	1.16897	1.16343		1.19496	1.03645	1.47008	1.34392	1.72042	1.17059	1.10399	1.40152
	8.47091e-07	7.21935e-07	7.55623e-07	1.13632e-06	1.09909e-06	4.00032e-07		4.09543e-07	1.64833e-06	2.54135e-06	6.81456e-07	0.000109513	0.00010457														1.37554	1.02237	1.1041	1.28866		1.019	0.884354	1.69598	1.34872	1.53486	1.16239	1.105	1.19777
	7.90693e-07	8.01612e-07	8.84073e-07	1.35014e-06	1.09868e-06	4.00449e-07	5.76143e-07	2.72707e-07	1.74841e-06	2.35129e-06	7.03412e-07	0.000104949	0.000107813														1.28395	1.1352	1.29179	1.53115		1.02006	1.26792	1.12932	1.43061	1.42008	1.19984	1.05895	1.23493
	6.57194e-07	7.68305e-07	9.66586e-07	1.20252e-06	1.16672e-06	4.06966e-07		3.34748e-07	1.7765e-06	2.69571e-06	6.90401e-07	9.99723e-05	0.000110919														1.06717	1.08803	1.41236	1.36374		1.03666	1.03933	1.38625	1.45359	1.62809	1.17765	1.00874	1.2705
	7.34672e-07	6.98424e-07	1.03892e-06	1.03485e-06	9.69592e-07	4.00438e-07		4.0862e-07	1.60535e-06	2.3585e-06	6.83811e-07	0.000103933	0.000117607														1.19299	0.98907	1.51806	1.17359		1.02003	1.00157	1.69216	1.31355	1.42443	1.16641	1.04871	1.34711
	7.49329e-07	8.9881e-07	1.03279e-06	1.00923e-06	1.00247e-06	4.73608e-07		3.0067e-07	1.67105e-06	2.28546e-06	7.2762e-07	0.000101192	0.000115629														1.21679	1.27285	1.50909	1.14453		1.20642	1.12041	1.24512	1.36731	1.38031	1.24113	1.02105	1.32445
	1.03865e-06	8.23374e-07	8.76487e-07	1.02574e-06	1.21791e-06	5.23614e-07	6.31404e-07	2.67764e-07	1.70199e-06	2.47236e-06	7.30576e-07	0.000108396	0.000110357														1.6866	1.16602	1.28071	1.16325		1.3338	0.802691	1.10886	1.39263	1.4932	1.24618	1.09374	1.26407
	9.83375e-07	7.86204e-07	9.99258e-07	9.56937e-07	9.44625e-07	4.59075e-07		3.64078e-07	1.66725e-06	2.66072e-06	7.81028e-07	0.000100271	0.000117522														1.59684	1.11338	1.4601	1.08523		1.1694	0.87579	1.5077	1.3642	1.60695	1.33223	1.01175	1.34614
	7.51024e-07	1.16806e-06	9.15117e-07	1.1154e-06	9.86739e-07	4.86533e-07		2.51209e-07	1.60811e-06	2.61436e-06	7.62091e-07	0.000105118	0.000125336														1.21954	1.65414	1.33715	1.26494		1.23934	1.01446	1.0403	1.31581	1.57896	1.29993	1.06066	1.43564
	6.33379e-07	8.58196e-07	8.87463e-07	9.98358e-07	1.11212e-06	5.4498e-07		2.7615e-07	1.68397e-06	3.1501e-06	7.22245e-07	0.000108583	0.000111888														1.0285	1.21533	1.29675	1.1322		1.38823	1.01055	1.14358	1.37788	1.90252	1.23197	1.09562	1.2816
	7.28678e-07	1.02243e-06	1.02608e-06	1.04756e-06	9.85206e-07	4.82044e-07		2.83879e-07	1.67294e-06	2.62522e-06	8.61348e-07	0.00010591	0.000115396														1.18325	1.44791	1.4993	1.188		1.22791	0.828751	1.17559	1.36886	1.58551	1.46924	1.06865	1.32179
	9.27113e-07	8.87021e-07	9.98369e-07	1.12395e-06	1.08102e-06	4.4938e-07	7.8151e-07	3.17828e-07	1.85844e-06	2.32656e-06	7.0716e-07	0.000114858	0.000110802														1.50548	1.25615	1.4588	1.27463		1.1447	0.791892	1.31618	1.52063	1.40514	1.20623	1.15895	1.26916
	8.50669e-07	1.14275e-06	8.97518e-07	1.19786e-06	9.99357e-07	4.0315e-07	6.67942e-07	3.28088e-07	1.70608e-06	2.76499e-06	8.66847e-07	0.000116852	0.000110232														1.38135	1.6183	1.31144	1.35845		1.02694	0.867845	1.35866	1.39597	1.66993	1.47862	1.17906	1.26264
	6.70851e-07	1.05075e-06	9.38708e-07	1.01608e-06	1.01734e-06	4.54316e-07		3.35513e-07	1.74779e-06	2.66347e-06	7.34583e-07	0.000107839	0.000113986														1.08935	1.48802	1.37162	1.1523		1.15728	1.07416	1.38941	1.4301	1.60861	1.25301	1.08812	1.30564
	6.68913e-07	7.81193e-07	9.7838e-07	1.04038e-06	1.09373e-06	4.91349e-07		3.59435e-07	1.68994e-06	2.85917e-06	8.16088e-07	0.000110789	0.00011102														1.08621	1.10628	1.42959	1.17985		1.25161	0.918066	1.48848	1.38276	1.72681	1.39204	1.11789	1.27166
																											1.24913	1.38333	1.41415	1.23065		1.16169	0.896143	1.34566	1.41966	1.5992	1.35983	1.12253	1.28618
