# Supplementary material for: Cholecystokinin modulates age-dependent thalamocortical neuroplasticity
Source: eLife journal article supplement (doi:10.7554/elife.101513), 2024-10-14
Supplement: data1 [file thalamic-cortical laser cheta 2022.xlsx]

## Sheet: laser in MGB
	20211103-1-2	20211103-1-4	20211103-2-1	20211103-2-2	20211103-2-3	20211103-2-4	20211103-3-1	20211103-3-2	20211103-3-3	20211103-3-4	20220923-1-3	20220923-2-1	20220923-2-2	20220923-2-4	20221011-1-2	20221011-1-4	20221011-2-1	20221011-2-3	20221013-1-1	20221013-1-3	20221014-1-4						4.6075e-08		7.19289e-08	6.24601e-08	5.75379e-06	7.29842e-08	1.0206e-05	7.94123e-08	6.09748e-08		1.94944e-07	4.12442e-07	7.52161e-07	2.75122e-07	2.02999e-07	2.14363e-07	8.30181e-08	1.06681e-07		4.26193e-05	2.3311e-07
	3.37339e-08	4.57334e-08	7.61416e-08	7.62139e-08	8.71177e-06	7.3785e-08	1.3106e-05	7.55138e-08	5.26053e-08	4.09967e-08	1.6284e-07	4.17414e-07	7.08742e-07	2.86197e-07	1.97103e-07	2.03422e-07	7.68304e-08	9.106e-08	3.79733e-07	4.79871e-05	2.46368e-07						0.732152		1.05857	1.2202	1.51409	1.01097	1.28415	0.950908	0.86274		0.83532	1.01206	0.942275	1.04025	0.970957	0.948959	0.925465	0.853576		1.12595	1.05687
	5.83973e-08	2.7207e-08	7.79612e-08	8.25348e-08	6.70812e-06	7.86604e-08	8.10826e-06	9.08271e-08	4.70709e-08	6.53753e-08	1.91409e-07	4.28546e-07	7.14312e-07	2.29881e-07	1.88994e-07	2.19437e-07	8.76584e-08	1.16794e-07	3.65009e-07	3.25329e-05	2.04111e-07		N=6				1.26744		1.08386	1.3214	1.16586	1.07777	0.794462	1.14374	0.771973		0.981869	1.03904	0.949679	0.83556	0.931011	1.02367	1.05589	1.0948		0.763338	0.875598
	3.35464e-08	5.88245e-08	5.02564e-08	4.45692e-08	7.30993e-06	8.78272e-08	1.34536e-05	7.08217e-08	7.15424e-08	6.7329e-08	2.19454e-07	3.77244e-07	7.58349e-07	2.68406e-07	2.19681e-07	2.03763e-07	8.09312e-08	8.9995e-08	3.66875e-07	4.43689e-05	2.06171e-07		n=18				0.728082		0.698695	0.713563	1.27045	1.20337	1.31821	0.891823	1.17331		1.12573	0.914659	1.00823	0.975586	1.08218	0.950552	0.974861	0.843592		1.04105	0.884435
	3.593e-08	2.98688e-08	8.73188e-08	7.81405e-08	1.89639e-06	7.21346e-08	9.52731e-06	5.71142e-08	6.99499e-08	6.99101e-08	2.29429e-07	4.15945e-07	7.67199e-07	2.76384e-07	1.94732e-07	2.16025e-07	8.53416e-08	1.15527e-07	3.51991e-07	4.54197e-05	2.39853e-07						0.779817		1.21396	1.25105	0.329589	0.988359	0.933502	0.719211	1.14719		1.1769	1.00849	1.01999	1.00459	0.959277	1.00775	1.02799	1.08292		1.06571	1.02893
	5.31011e-08	5.93348e-08	8.35703e-08	5.39628e-08	4.92686e-06	7.85233e-08	8.47599e-06	9.26481e-08	7.10015e-08	6.20055e-08	2.09326e-07	4.14361e-07	7.52362e-07	2.61112e-07	2.08626e-07	2.18473e-07	9.17471e-08	1.25862e-07	3.76193e-07	4.52784e-05	2.25164e-07						1.15249		1.16185	0.863956	0.856281	1.07589	0.830492	1.16667	1.16444		1.07378	1.00465	1.00027	0.949076	1.02772	1.01917	1.10515	1.1798		1.06239	0.965913
	4.41423e-08	3.61993e-08	4.9683e-08	4.3598e-08	7.7497e-06	5.78352e-08	8.91784e-06	7.07743e-08	6.00367e-08	4.31687e-08	1.81117e-07	4.03588e-07	7.63032e-07	2.69281e-07	1.82953e-07	2.22641e-07	7.93868e-08	1.14946e-07	3.50261e-07	3.78122e-05	2.64238e-07						0.958053		0.690723	0.698013	1.34689	0.792434	0.873785	0.891226	0.984615		0.929072	0.978532	1.01445	0.978767	0.901253	1.03861	0.956259	1.07747		0.887209	1.13353
	4.64872e-08	4.12389e-08	8.85539e-08	6.29607e-08	4.41119e-06	7.49279e-08	8.43436e-06	9.99364e-08	5.81179e-08	5.67376e-08	1.90658e-07	4.1753e-07	7.77832e-07	3.09121e-07	2.22161e-07	2.31259e-07	7.38914e-08	8.31319e-08	3.9414e-07	4.92499e-05	2.3794e-07						1.00895		1.23113	1.00801	0.766659	1.02663	0.826413	1.25845	0.953147		0.978017	1.01234	1.03413	1.12358	1.0944	1.07882	0.890064	0.77926		1.15558	1.02072
	6.32617e-08	3.96381e-08	6.19461e-08	5.77011e-08	4.31635e-06	6.01804e-08	1.16245e-05	7.76627e-08	5.74734e-08	5.60752e-08	1.75316e-07	4.24909e-07	7.7546e-07	3.00597e-07	2.09739e-07	1.99884e-07	8.83583e-08	1.1613e-07	3.76882e-07	3.83053e-05	2.41035e-07						1.37302		0.861213	0.923807	0.750175	0.824566	1.13899	0.977968	0.942576		0.899316	1.03023	1.03098	1.09259	1.0332	0.932456	1.06433	1.08857		0.898777	1.034
																											1.05447		1.03177	0.948967	0.809918	0.941577	0.920636	1.00271	1.03839		1.01142	1.00685	1.01996	1.02972	1.00317	1.01536	1.00876	1.04161		1.01393	1.03662
	5.93196e-08	4.81916e-08	7.74874e-08	8.02663e-08	1.0717e-05		1.22971e-05	7.17396e-08	7.66036e-08	6.19029e-08	2.20336e-07	5.49311e-07	1.0583e-06	3.47818e-07	2.40108e-07	2.27965e-07	1.11897e-07	1.202e-07	4.09683e-07	4.25633e-05	1.95901e-07						2.09691		1.07728	1.28508	1.86259		1.20489	0.903381	1.25632		1.13025	1.33185	1.40701	1.26423	1.18281	1.06345	1.34786	1.12673		0.998687	0.84038
	7.08571e-08	1.20603e-07	9.08867e-08	5.45078e-08	1.01549e-05	7.28119e-08	1.37761e-05	7.97645e-08	9.63282e-08	7.56677e-08	2.03107e-07	6.72662e-07	1.1527e-06	3.39619e-07	2.18522e-07	2.3167e-07	8.95579e-08	1.31424e-07	4.00192e-07	4.04388e-05	2.31772e-07						1.39391		1.26356	0.872682	1.76491	0.997638	1.3498	1.00444	1.5798		1.04187	1.63093	1.53251	1.23443	1.07647	1.08074	1.07878	1.23194		0.948838	0.99426
	9.66151e-08	7.05663e-08	7.77941e-08	7.03274e-08	1.03626e-05	9.26052e-08	1.15096e-05	8.58912e-08	9.00247e-08	9.28453e-08	1.97397e-07	4.90309e-07	9.37029e-07	3.72306e-07	2.14494e-07	2.31763e-07	9.29887e-08	9.74665e-08	3.35969e-07	4.06355e-05	1.97728e-07						2.41519		1.08154	1.12596	1.80101	1.26884	1.12773	1.08159	1.47643		1.01259	1.1888	1.24578	1.35324	1.05663	1.08117	1.1201	0.913629		0.953453	0.848216
	6.42244e-08	6.08385e-08	1.26702e-07	7.35888e-08	1.08533e-05	9.75058e-08	1.2099e-05	7.85492e-08	7.54999e-08	9.23174e-08	2.06826e-07	4.90251e-07	9.45375e-07	3.63098e-07	2.52901e-07	2.35896e-07	7.00538e-08	7.38967e-08	3.89127e-07	4.05306e-05	2.11879e-07						2.2316		1.76149	1.17817	1.88629	1.33598	1.18548	0.989132	1.23822		1.06095	1.18865	1.25688	1.31977	1.24583	1.10045	0.843838	0.692691		0.950991	0.908921
	1.1128e-07	7.39469e-08	9.01914e-08	8.46885e-08	9.21846e-06	8.59502e-08	1.51055e-05	7.43453e-08	6.36766e-08	5.80853e-08	2.68872e-07	6.10298e-07	9.93716e-07	3.63291e-07	2.25733e-07	2.03868e-07	7.10506e-08	8.73721e-08	3.8455e-07	4.71747e-05	1.97551e-07						2.06572		1.2539	1.35588	1.60216	1.17765	1.48006	0.936194	1.04431		1.37923	1.47972	1.32115	1.32047	1.11199	0.951039	0.855845	0.819006		1.10689	0.847457
	1.02821e-07	4.75929e-08	8.12004e-08	5.37812e-08	5.05362e-06	1.19113e-07	1.49718e-05	9.60017e-08	7.0956e-08	5.56366e-08	2.22408e-07	4.55375e-07	8.65199e-07	3.75782e-07	2.08692e-07	2.10166e-07	1.10362e-07	9.86847e-08	4.7846e-07	3.57905e-05	2.69241e-07						1.89085		1.1289	0.861048	0.878312	1.63204	1.46696	1.2089	1.1637		1.14088	1.10409	1.15028	1.36587	1.02804	0.980421	1.32937	0.925048		0.839773	1.155
	9.51782e-08	8.35691e-08	8.81645e-08	6.25458e-08	9.88136e-06	9.68371e-08	1.34172e-05	7.09724e-08	9.38585e-08	8.51469e-08	2.07914e-07	4.99584e-07	8.71722e-07	3.89186e-07	2.40005e-07	2.1796e-07	7.52168e-08	1.01084e-07	4.6305e-07	3.82832e-05	2.35674e-07						2.18309		1.22572	1.00137	1.71737	1.32682	1.31464	0.893721	1.5393		1.06653	1.21128	1.15896	1.41459	1.1823	1.01678	0.906028	0.947536		0.898261	1.011
	8.71207e-08	7.75717e-08	8.78458e-08	5.79665e-08	1.22948e-05	1.17099e-07	1.40331e-05	6.6289e-08	7.99331e-08	7.62235e-08	2.74809e-07	4.35865e-07	7.76073e-07	3.10497e-07	2.34413e-07	2.4992e-07	9.91176e-08	1.05235e-07	3.51584e-07	3.70295e-05	2.22102e-07						1.2158		1.22129	0.928057	2.13681	1.60444	1.37498	0.834745	1.31092		1.40968	1.05679	1.03179	1.12858	1.15475	1.16587	1.19393	0.986453		0.868843	0.952778
	1.00586e-07	8.30743e-08	6.73554e-08	7.48102e-08	5.62499e-06	9.95205e-08	1.33784e-05	1.05048e-07	9.83234e-08	1.01644e-07	2.29886e-07	5.8877e-07	1.16674e-06	3.88647e-07	2.34995e-07	2.22379e-07	7.84639e-08	1.18041e-07	4.17201e-07	4.5702e-05	2.38862e-07						1.11416		0.936416	1.19773	0.977615	1.36359	1.31084	1.32282	1.61253		1.17924	1.42752	1.55119	1.41263	1.15762	1.03739	0.945142	1.10649		1.07233	1.02467
	5.60178e-08	5.74244e-08	6.47719e-08	9.31182e-08	5.39507e-06	7.77536e-08	1.21073e-05	1.03595e-07	8.57574e-08	6.82546e-08	2.5168e-07	6.83902e-07	1.23833e-06	3.70399e-07	2.25748e-07	2.11503e-07	8.5081e-08	1.46341e-07	4.11309e-07	4.28026e-05	2.26174e-07						1.22504		0.900499	1.49084	0.937656	1.06535	1.18629	1.30452	1.40644		1.29104	1.65818	1.64636	1.3463	1.11207	0.986658	1.02485	1.37177		1.0043	0.970246
	5.13348e-08	1.06123e-07	1.23265e-07	4.65593e-08	9.71977e-06	9.63088e-08	1.43079e-05	1.01865e-07	1.08547e-07	1.0311e-07	2.0872e-07	5.42503e-07	1.01013e-06	3.10702e-07	2.45633e-07	2.32852e-07	6.59179e-08	1.24343e-07	4.26178e-07	4.97055e-05	2.53742e-07						1.62708		1.7137	0.745425	1.68928	1.31958	1.40192	1.28273	1.78019		1.07067	1.31534	1.34297	1.12932	1.21002	1.08625	0.794018	1.16557		1.16627	1.08851
	5.64439e-08	5.07713e-08	8.53543e-08	6.76898e-08	1.22058e-05	8.35177e-08	1.61585e-05	7.73332e-08	6.33393e-08	5.58939e-08	2.12746e-07	5.00469e-07	8.91401e-07	3.46452e-07	2.85849e-07	2.37274e-07	1.15765e-07	1.00488e-07	4.02634e-07	4.06199e-05	2.04116e-07						2.27132		1.18665	1.08373	2.12136	1.14433	1.58324	0.973819	1.03878		1.09132	1.21343	1.18512	1.25927	1.40813	1.10688	1.39445	0.941948		0.953087	0.875619
	7.49678e-08	4.35671e-08	8.15098e-08	9.25132e-08	9.20741e-06	8.07363e-08	1.48785e-05	7.42796e-08	7.24376e-08	6.75195e-08	2.444e-07	5.89296e-07	1.01761e-06	3.75394e-07	2.23271e-07	2.30004e-07	7.88359e-08	1.52732e-07	4.31139e-07	4.65254e-05	2.18479e-07						2.18905		1.1332	1.48116	1.60023	1.10622	1.45782	0.935366	1.18799		1.2537	1.4288	1.35292	1.36446	1.09986	1.07296	0.949623	1.43167		1.09165	0.937236
	1.04651e-07	9.80342e-08	7.76774e-08	5.36977e-08	1.35486e-05	6.97984e-08	1.26743e-05	6.95904e-08	1.15394e-07	9.33319e-08	1.95699e-07	5.78724e-07	9.63679e-07	4.16498e-07	2.85823e-07	2.73074e-07	1.31836e-07	9.18235e-08	4.35924e-07	3.99352e-05	2.0862e-07						1.97643		1.07992	0.859711	2.35473	0.956349	1.24185	0.876318	1.89249		1.00387	1.40316	1.28121	1.51386	1.40801	1.27389	1.58804	0.860733		0.937022	0.894941
	1.00861e-07	5.53766e-08	1.29386e-07	5.63649e-08	9.72171e-06	1.02468e-07	1.37699e-05	1.16699e-07	9.20486e-08	6.51337e-08	2.67526e-07	5.71773e-07	9.49106e-07	3.91039e-07	2.24269e-07	2.70044e-07	1.1089e-07	1.18624e-07	4.75894e-07	3.56838e-05	1.96902e-07						1.40921		1.7988	0.902414	1.68962	1.40398	1.3492	1.46953	1.50962		1.37232	1.38631	1.26184	1.42133	1.10478	1.25975	1.33573	1.11195		0.837268	0.844672
	9.10641e-08	6.93121e-08	6.48388e-08	8.30314e-08	1.35722e-05	1.21102e-07	1.11015e-05	9.29895e-08	6.08088e-08	8.2141e-08	2.43044e-07	5.64287e-07	9.90591e-07	3.19457e-07	2.6838e-07	2.63688e-07	8.94388e-08	1.45475e-07	3.79064e-07	4.94971e-05	1.99301e-07						1.0521		0.901429	1.32935	2.35883	1.6593	1.08775	1.17097	0.997278		1.24674	1.36816	1.31699	1.16114	1.32208	1.2301	1.07734	1.36365		1.16138	0.854965
	6.49295e-08	5.70096e-08	1.39054e-07	6.05547e-08	6.37759e-06	6.44361e-08	1.09556e-05	8.40628e-08	8.22674e-08	6.74465e-08	1.81176e-07	6.38633e-07	9.79098e-07	4.25962e-07	2.81689e-07	2.72482e-07	1.05837e-07	7.98727e-08	3.8756e-07	5.74763e-05	2.2758e-07						1.219		1.93322	0.969494	1.10842	0.882877	1.07345	1.05856	1.3492		0.929377	1.54842	1.30171	1.54826	1.38764	1.27112	1.27486	0.748709		1.3486	0.976277
	4.84757e-08	9.00083e-08	7.08963e-08	5.99634e-08	9.77387e-06	7.88818e-08	1.27618e-05	8.13018e-08	7.069e-08	6.461e-08	2.23081e-07	6.84742e-07	1.09607e-06	4.67228e-07	2.41867e-07	2.34614e-07	7.77709e-08	9.09363e-08	4.38822e-07	4.6216e-05	1.79579e-07						2.28962		0.985644	0.960028	1.69869	1.08081	1.25042	1.02379	1.15933		1.14433	1.66021	1.45723	1.69825	1.19147	1.09447	0.936794	0.852416		1.08439	0.770362
	5.61655e-08	7.15834e-08	1.31196e-07	6.65922e-08	8.77613e-06	1.22937e-07	1.11929e-05	8.90323e-08	8.79204e-08	6.16201e-08	2.54242e-07	4.97052e-07	9.41852e-07	3.89657e-07	2.31968e-07	2.17646e-07	1.24967e-07	8.30132e-08	5.09753e-07	3.75344e-05	2.75117e-07						1.46186		1.82396	1.06616	1.52528	1.68444	1.0967	1.12114	1.44191		1.30418	1.20514	1.25219	1.4163	1.1427	1.01531	1.5053	0.778147		0.880691	1.1802
	1.05494e-07	4.39149e-08	1.10583e-07	7.70924e-08	5.38723e-06	1.23031e-07	1.30279e-05	1.17931e-07	6.73899e-08	8.43338e-08	2.39726e-07	5.15497e-07	8.24686e-07	4.4951e-07	2.56525e-07	2.20423e-07	7.4102e-08	1.0602e-07	4.08789e-07	3.98615e-05	2.90526e-07						1.05191		1.5374	1.23427	0.936292	1.68572	1.2765	1.48505	1.10521		1.22972	1.24987	1.09642	1.63385	1.26368	1.02827	0.8926	0.993808		0.935293	1.24631
	6.73554e-08	5.95528e-08	1.03664e-07	4.51596e-08	7.60389e-06	1.0471e-07	1.85988e-05	7.84038e-08	1.05142e-07	1.09649e-07	2.06934e-07	6.06165e-07	1.0101e-06	4.07926e-07	2.33093e-07	2.33836e-07	7.14786e-08	1.44677e-07	4.51399e-07	5.48566e-05	1.98002e-07						1.42904		1.4412	0.723015	1.32155	1.43469	1.82234	0.987301	1.72436		1.06151	1.4697	1.34292	1.48271	1.14825	1.09084	0.860999	1.35617		1.28713	0.849392
	4.84669e-08	7.93971e-08	8.29305e-08	4.42683e-08	1.18409e-05	1.00897e-07	1.60728e-05	7.06101e-08	5.85057e-08	6.30023e-08	2.47011e-07	6.89604e-07	1.13872e-06	4.27235e-07	2.47929e-07	2.36542e-07	1.19835e-07	1.39918e-07	5.63878e-07	3.87657e-05	2.01921e-07						1.63961		1.15295	0.708745	2.05793	1.38245	1.57484	0.889159	0.959508		1.26709	1.672	1.51393	1.55289	1.22133	1.10346	1.44349	1.31156		0.90958	0.866202
	6.58429e-08	6.39716e-08	1.42487e-07	9.27184e-08	1.50105e-05	8.63492e-08	1.84504e-05	8.56315e-08	5.87227e-08	6.8135e-08	1.99854e-07	6.56067e-07	1.05443e-06	3.81833e-07	2.52389e-07	2.12391e-07	6.92835e-08	1.08421e-07	4.90478e-07	4.878e-05	3.16424e-07						0.700182		1.98094	1.48444	2.6088	1.18312	1.8078	1.07832	0.963065		1.02519	1.59069	1.40187	1.38787	1.2433	0.990799	0.834558	1.01631		1.14455	1.3574
	7.55451e-08	7.85014e-08	1.00385e-07	9.53296e-08	1.14661e-05	6.76928e-08	1.23544e-05	7.69742e-08	7.62725e-08	8.68076e-08	2.58282e-07	5.46319e-07	1.02739e-06	3.19897e-07	2.35644e-07	2.54073e-07	1.21017e-07	1.4482e-07	5.23782e-07	3.9981e-05	2.40191e-07						0.547739		1.39562	1.52625	1.99278	0.927499	1.21051	0.969298	1.25089		1.3249	1.3246	1.36592	1.16274	1.16082	1.18525	1.45772	1.35751		0.938097	1.03038
	3.22609e-08	1.08796e-07	6.56269e-08	8.233e-08	8.37129e-06	9.08876e-08	1.09005e-05	9.75606e-08	9.55606e-08	1.06372e-07	1.9759e-07	5.56969e-07	9.26866e-07	4.01867e-07	2.45399e-07	2.55806e-07	1.32927e-07	1.43762e-07	6.14481e-07	4.1357e-05	2.75631e-07						1.6817		0.912385	1.31812	1.45492	1.2453	1.06805	1.22853	1.56722		1.01357	1.35042	1.23227	1.46068	1.20887	1.19333	1.60118	1.34759		0.970381	1.1824
	2.52371e-08	5.34533e-08	8.36599e-08	7.0479e-08	8.95022e-06	8.84036e-08	1.13091e-05	1.14016e-07	1.14126e-07	8.66448e-08	2.36031e-07	5.36216e-07	9.52046e-07	4.42762e-07	2.61959e-07	2.03814e-07	1.07838e-07	1.38966e-07	6.21159e-07	5.45078e-05	2.13786e-07						1.02764		1.16309	1.12838	1.55554	1.21127	1.10808	1.43575	1.87169		1.21076	1.3001	1.26575	1.60933	1.29045	0.950789	1.29897	1.30263		1.27895	0.917102
	7.74844e-08	7.33823e-08	1.22634e-07	5.30315e-08	1.30594e-05	6.90452e-08	1.75313e-05	9.08374e-08	8.79254e-08	9.51095e-08	2.52815e-07	5.07691e-07	8.8681e-07	3.76985e-07	2.56318e-07	2.43192e-07	1.29012e-07	1.02517e-07	5.85424e-07	6.24527e-05	2.08081e-07						1.02764		1.70493	0.849046	2.26971	0.946029	1.71775	1.14387	1.442		1.29686	1.23094	1.17902	1.37025	1.26266	1.13448	1.55402	0.960968		1.46536	0.892632
	4.73485e-08	5.1376e-08	1.03941e-07	8.76253e-08	9.11325e-06	7.35986e-08	1.2038e-05	7.75392e-08	9.22664e-08	6.28815e-08	2.3127e-07	5.14054e-07	9.24315e-07	4.39987e-07	2.44276e-07	2.43837e-07	1.14506e-07	1.5128e-07	6.12531e-07	5.90335e-05	2.0747e-07						1.09153		1.44505	1.4029	1.58387	1.00842	1.17951	0.976413	1.51319		1.18634	1.24637	1.22888	1.59924	1.20334	1.1375	1.37929	1.41806		1.38514	0.890008
	4.73485e-08	8.79801e-08	1.33934e-07	5.92454e-08	8.52164e-06	7.01129e-08	1.68357e-05	8.57758e-08	7.78741e-08	6.93667e-08	2.71334e-07	5.89742e-07	9.25729e-07	4.31314e-07	2.53621e-07	2.75038e-07	1.25538e-07	1.43644e-07	5.83255e-07	4.92496e-05	2.42614e-07						1.38992		1.86203	0.948532	1.48105	0.960659	1.64959	1.08013	1.27715		1.39186	1.42988	1.23076	1.56772	1.24937	1.28305	1.51217	1.34648		1.15557	1.04077
	5.02924e-08	8.62506e-08	8.15617e-08	1.05513e-07	1.18481e-05	7.03967e-08	1.21295e-05	1.12105e-07	7.29578e-08	7.13903e-08	2.12091e-07	5.50903e-07	8.93292e-07	4.75188e-07	2.50104e-07	2.25771e-07	1.20724e-07	8.85143e-08	5.88382e-07	5.10482e-05	2.42883e-07						2.12098		1.13392	1.68929	2.05918	0.964547	1.18847	1.41169	1.19653		1.08796	1.33571	1.18763	1.72719	1.23205	1.05322	1.45418	0.829713		1.19777	1.04193
	6.40407e-08				9.18243e-08		1.24967e-05														2.01962e-07
	9.77243e-08																				1.96209e-07						1.33154		1.4618	1.20363	1.78987	1.01818	1.36868	1.20957	1.46011		1.23476	1.3086	1.21841	1.57474	1.24757	1.11181	1.43973	1.17157		1.29656	0.956487
																					2.17239e-07
																					2.59864e-07
																					2.89857e-07

## Sheet: laser in AC
	20211105-1-2	20211105-1-3	20211105-2-1	20211105-2-2	20211105-2-3	20211105-2-4	20211110-1-1	20211110-1-2	20211110-1-3	20211110-1-4	20211110-2-1	20211110-2-2	20211110-2-4	20211112-1-1	20211112-1-2	20211112-1-3	20211112-1-4	20211112-1-2	20211112-1-3	20211112-1-4	20220224-1-1	20220224-1-2	20220224-1-3	20220224-2-1	20220224-2-2		7.52407e-08	1.79095e-05	5.55907e-08	5.61444e-08	4.4633e-07	1.06085e-05	1.86079e-05	2.40863e-07	2.92413e-07	9.84234e-08	1.23164e-07	2.90729e-07	9.8332e-08	1.09853e-07	6.01152e-08	4.76026e-08	9.86793e-07	4.55935e-07	1.22847e-07	1.08933e-07	1.04591e-05	5.64956e-06	5.25671e-08
	9.58901e-08	1.7047e-05	6.42469e-08	4.6452e-08	4.89701e-07	1.26883e-05	1.50055e-05	2.43846e-07	2.89413e-07	1.01767e-07	9.55886e-08	2.7888e-07	9.39567e-08	1.1368e-07	7.64603e-08	4.99645e-08	9.85041e-07	4.13005e-07	1.30457e-07	1.01384e-07	8.49559e-06	4.79521e-06	3.69872e-08	1.06314e-07	7.17994e-08		1.27444	0.951841	1.15571	0.827367	1.09717	1.19605	0.806402	1.01238	0.989741	1.03398	0.77611	0.959246	0.955505	1.03484	1.2719	1.04962	0.998225	0.905842	1.06194	0.930701	0.81227	0.848776	0.703619
	6.67628e-08	1.63202e-05	4.66321e-08	4.47449e-08	3.83175e-07	9.9324e-06	1.79771e-05	2.22331e-07	2.87362e-07	9.64033e-08	9.65679e-08	2.6684e-07	1.05678e-07	1.37323e-07	6.65796e-08	5.32509e-08	9.7595e-07	4.06812e-07	1.06303e-07	1.08085e-07	1.29524e-05	6.77902e-06	6.70668e-08	1.01145e-07	7.38764e-08		0.887323	0.911258	0.838846	0.796961	0.858502	0.936264	0.966101	0.92306	0.982727	0.979475	0.784062	0.917833	1.07471	1.25007	1.10753	1.11866	0.989012	0.892257	0.865328	0.992218	1.23839	1.19992	1.27583
	5.50037e-08	1.68819e-05	6.5244e-08	5.28187e-08	4.51801e-07	7.83436e-06	2.24369e-05	2.46606e-07	2.91784e-07	9.0209e-08	1.58855e-07	2.81036e-07	1.02085e-07	6.99255e-08	4.8035e-08	4.07213e-08	9.74716e-07	4.99411e-07	1.30085e-07	1.22146e-07	1.35571e-05	6.15227e-06	7.01129e-08	8.53479e-08	7.32498e-08		0.731037	0.942621	1.17365	0.940765	1.01226	0.738496	1.20577	1.02384	0.99785	0.916541	1.28979	0.96666	1.03817	0.63654	0.799049	0.855442	0.987762	1.09535	1.05892	1.12129	1.2962	1.08898	1.33378
	9.20786e-08	1.92303e-05	4.55107e-08	5.9561e-08	4.73332e-07	1.16739e-05	1.86413e-05	2.42855e-07	2.65699e-07	1.1305e-07	1.15299e-07	3.06884e-07	9.36966e-08	1.44669e-07	8.59991e-08	5.19231e-08	9.53949e-07	4.44808e-07	1.05917e-07	1.07109e-07	8.49634e-06	4.09549e-06	6.04521e-08	9.16648e-08	6.32463e-08		1.22379	1.07375	0.818674	1.06085	1.0605	1.10043	1.00179	1.00827	0.908643	1.14861	0.936148	1.05557	0.952859	1.31694	1.43057	1.09076	0.966717	0.975596	0.862186	0.983259	0.812342	0.724922	1.15
	9.31716e-08	1.40794e-05	5.13999e-08	6.11753e-08	4.44181e-07	1.2362e-05	2.05108e-05	2.36742e-07	2.91606e-07	8.85798e-08	8.53784e-08	3.14312e-07	1.07696e-07	1.18119e-07	4.1483e-08	4.09827e-08	1.02008e-06	4.65974e-07	1.40241e-07	1.1644e-07	7.49563e-06	6.77895e-06	5.59003e-08	1.0157e-07	7.70867e-08		1.23831	0.786141	0.924613	1.08961	0.995186	1.16528	1.10226	0.982891	0.99724	0.899987	0.693211	1.08112	1.09522	1.07525	0.690058	0.860935	1.03374	1.02202	1.14159	1.06891	0.716663	1.19991	1.06341
	5.24265e-08	2.02259e-05	5.6019e-08	6.37106e-08	4.45842e-07	1.07677e-05	1.33812e-05	2.47555e-07	3.0853e-07	9.61109e-08	1.39785e-07	3.02012e-07	9.46579e-08	1.00305e-07	5.83914e-08	4.71227e-08	1.04479e-06	4.30682e-07	1.33428e-07	1.15107e-07	9.71662e-06	6.83509e-06	4.72869e-08	7.90815e-08	9.26352e-08		0.696783	1.12934	1.0077	1.13476	0.998907	1.015	0.719113	1.02778	1.05512	0.976504	1.13495	1.03881	0.962636	0.913088	0.971325	0.989919	1.05877	0.944613	1.08613	1.05667	0.929014	1.20984	0.899553
	6.2566e-08	1.96935e-05	5.94719e-08	6.26851e-08	4.21343e-07	8.3063e-06	2.19383e-05	2.39961e-07	2.91927e-07	8.92051e-08	1.53633e-07	3.01579e-07	8.89813e-08	1.13818e-07	5.19399e-08	4.1985e-08	1.02702e-06	4.76279e-07	1.14243e-07	9.53869e-08	1.2364e-05	5.41112e-06	4.09557e-08	1.01347e-07	7.47046e-08		0.831545	1.09961	1.06982	1.1165	0.944018	0.782982	1.17898	0.996254	0.998338	0.90634	1.24739	1.03732	0.904907	1.0361	0.864006	0.881989	1.04077	1.04462	0.929958	0.875647	1.18214	0.957794	0.779112
	8.40265e-08	1.9798e-05	5.62013e-08	5.80076e-08	4.61263e-07	1.13034e-05	1.89723e-05	2.4701e-07	3.12983e-07	1.12062e-07	1.40202e-07	2.74285e-07	9.99044e-08	8.098e-08	5.20331e-08	5.48707e-08	9.12798e-07	5.1051e-07	1.22102e-07	1.05806e-07	1.05949e-05	4.34936e-06	4.17749e-08	9.27407e-08	6.50359e-08		1.11677	1.10545	1.01098	1.03319	1.03346	1.0655	1.01958	1.02552	1.07034	1.13857	1.13834	0.943441	1.01599	0.737171	0.865558	1.15268	0.925015	1.1197	0.993939	0.971295	1.01299	0.769857	0.794697
																											0	0	0
																											1.02144	1.03886	0.966358	1.08698	1.00641	1.02584	1.00435	1.00814	1.00594	1.014	1.03001	1.03125	0.986323	1.01571	0.964304	0.995257	1.005	1.02131	1.00276	0.991157	0.930628	0.972465	0.937354
																											0	0	0
	5.76729e-08	1.52899e-05	5.48999e-08	6.07421e-08	3.90486e-07	8.73244e-06	2.97546e-05	2.60401e-07	3.79285e-07	8.98508e-08	1.86705e-07	3.2796e-07	1.60785e-07	1.41198e-07	1.00278e-07	7.80677e-08	1.01632e-06	6.56026e-07	7.52348e-08	6.69875e-08	1.8604e-05	4.6506e-06	1.24395e-07	9.87282e-08	8.59952e-08		0.766511	0.853727	0.987574	1.08189	0.874883	0.823151	1.59903	1.08111	1.29709	0.912901	1.51591	1.12806	1.63513	1.28534	1.6681	1.63999	1.02992	1.43886	0.612426	0.614942	1.77875	0.823178	2.36641
	7.88913e-08	1.94879e-05	6.70597e-08	7.214e-08	4.01618e-07	8.90444e-06	2.60504e-05	2.85116e-07	3.82559e-07	1.02194e-07	1.67714e-07	3.27676e-07	1.08847e-07	1.35005e-07	6.73499e-08	6.01877e-08	9.21727e-07	6.13414e-07	1.12406e-07	8.32388e-08	1.45035e-05	7.0409e-06	7.50904e-08	9.6542e-08	1.0756e-07		1.04852	1.08813	1.20631	1.2849	0.899824	0.839365	1.39996	1.18373	1.30828	1.03832	1.36172	1.12709	1.10693	1.22896	1.12035	1.26438	0.934064	1.3454	0.91501	0.764128	1.38669	1.24627	1.42847
	9.35831e-08	2.12385e-05	6.02461e-08	6.89232e-08	3.82012e-07	1.34406e-05	3.4903e-05	2.63652e-07	3.36545e-07	9.10914e-08	1.12021e-07	3.42681e-07	1.2549e-07	9.33396e-08	7.32871e-08	7.79223e-08	9.41051e-07	5.97747e-07	8.70737e-08	7.62266e-08	1.15511e-05	1.065e-05	9.60951e-08	1.05547e-07	1.03472e-07		1.24378	1.18588	1.08374	1.22761	0.855897	1.26696	1.87571	1.09461	1.15092	0.925505	0.909527	1.1787	1.27619	0.849681	1.21911	1.63693	0.953645	1.31104	0.708797	0.699756	1.10441	1.88509	1.82805
	1.05596e-07	2.44145e-05	5.14505e-08	5.70262e-08	4.11695e-07	1.42974e-05	3.26951e-05	2.51772e-07	3.09e-07	1.66484e-07	1.73969e-07	3.76657e-07	1.22911e-07	9.23526e-08	1.01719e-07	5.57538e-08	9.27461e-07	6.27511e-07	1.17339e-07	9.15429e-08	1.58843e-05	5.54665e-06	9.90962e-08	9.73218e-08	6.57906e-08		1.40344	1.36321	0.925523	1.01571	0.922401	1.34772	1.75705	1.04529	1.05673	1.69151	1.4125	1.29556	1.24996	0.840696	1.69208	1.17123	0.939874	1.37632	0.955167	0.84036	1.51871	0.981784	1.88514
	8.27701e-08	2.29293e-05	6.76363e-08	7.18683e-08	4.20489e-07	1.21181e-05	2.48739e-05	2.96805e-07	3.72965e-07	1.47469e-07	1.62463e-07	3.01497e-07	1.04914e-07	1.28272e-07	9.69167e-08	4.80144e-08	1.01116e-06	5.81957e-07	1.01672e-07	7.33271e-08	2.67331e-05	1.53708e-05	3.05033e-08	1.59956e-07	9.6165e-08		1.10007	1.28028	1.21668	1.28006	0.942105	1.1423	1.33674	1.23225	1.27547	1.49831	1.31908	1.03704	1.06693	1.16768	1.61218	1.00865	1.02469	1.2764	0.827627	0.673139	2.55598	2.7207	0.580274
	5.88744e-08	1.94084e-05	8.57913e-08	8.55283e-08	3.98291e-07	1.55041e-05	2.20837e-05	3.57966e-07	3.4508e-07	9.79562e-08	1.85678e-07	3.65517e-07	1.29897e-07	9.80078e-08	8.8977e-08	6.04472e-08	9.88468e-07	5.91545e-07	1.53402e-07	9.48412e-08	1.58242e-05	9.96856e-06	7.61335e-08	1.70015e-07	1.05209e-07		0.782481	1.08369	1.54327	1.52336	0.89237	1.46147	1.18679	1.48618	1.18011	0.995254	1.50757	1.25724	1.321	0.892176	1.48011	1.26983	1.0017	1.29743	1.24872	0.870638	1.51297	1.76448	1.44831
	5.90405e-08	1.72386e-05	6.2919e-08	8.59199e-08	4.47838e-07	1.38667e-05	3.0228e-05	3.31336e-07	3.67882e-07	1.07987e-07	1.14876e-07	3.15268e-07	1.15717e-07	1.23858e-07	6.01608e-08	9.85397e-08	1.02842e-06	6.19571e-07	1.61636e-07	1.07106e-07	2.01763e-05	4.57484e-06	1.77529e-07	1.16969e-07	1.09036e-07		0.784688	0.962539	1.13183	1.53034	1.00338	1.30713	1.62447	1.37562	1.25809	1.09717	0.932714	1.08441	1.1768	1.1275	1.00076	2.07005	1.04219	1.3589	1.31575	0.983225	1.92907	0.809769	3.37718
	9.43601e-08	2.18349e-05	7.91472e-08	6.35181e-08	4.61691e-07	1.10504e-05	3.29001e-05	2.72959e-07	3.74643e-07	1.43296e-07	1.67462e-07	3.58656e-07	1.41825e-07	1.31213e-07	9.97732e-08	8.4252e-08	1.02377e-06	6.12078e-07	1.34409e-07	9.59972e-08	1.22811e-05	1.03098e-05	9.22973e-08	1.28142e-07	6.06836e-08		1.25411	1.21918	1.42375	1.13134	1.03442	1.04165	1.76807	1.13325	1.28121	1.45592	1.35967	1.23364	1.44231	1.19444	1.6597	1.7699	1.03748	1.34247	1.09411	0.881249	1.17421	1.82488	1.7558
	8.09318e-08	1.91577e-05	6.35459e-08	1.01499e-07	4.71679e-07	1.33487e-05	1.81231e-05	2.54067e-07	3.94155e-07	1.0896e-07	1.54848e-07	3.19583e-07	1.57439e-07	8.65857e-08	1.0138e-07	7.06991e-08	1.12512e-06	5.77278e-07	1.65327e-07	1.20666e-07	1.42719e-05	5.7091e-06	1.76048e-07	1.08835e-07	5.38823e-08		1.07564	1.06969	1.1431	1.80782	1.05679	1.2583	0.973943	1.05482	1.34794	1.10706	1.25725	1.09925	1.60109	0.7882	1.68644	1.48519	1.14018	1.26614	1.3458	1.10771	1.36455	1.01054	3.34902
	4.43316e-08	2.10714e-05	9.08249e-08	5.12543e-08	4.54825e-07	1.28936e-05	2.65818e-05	2.77465e-07	4.21764e-07	1.31942e-07	1.47728e-07	3.5732e-07	1.58736e-07	1.12128e-07	8.64447e-08	9.52796e-08	1.05167e-06	5.78967e-07	1.62064e-07	1.09082e-07	1.68095e-05	7.06562e-06	8.42811e-08	1.30049e-07	1.23962e-07		0.589197	1.17655	1.63381	0.912901	1.01903	1.2154	1.42852	1.15196	1.44236	1.34055	1.19945	1.22905	1.61429	1.02072	1.43799	2.00156	1.06575	1.26984	1.31923	1.00137	1.60717	1.25065	1.6033
	5.85633e-08	2.4736e-05	8.30346e-08	7.65299e-08	4.86705e-07	1.52546e-05	1.75719e-05	2.38571e-07	4.13273e-07	1.29592e-07	1.7447e-07	3.92354e-07	1.08897e-07	1.00352e-07	8.37865e-08	5.44114e-08	1.08187e-06	5.84228e-07	1.74986e-07	1.30837e-07	1.5539e-05	1.78998e-05	7.87823e-08	8.593e-08	8.58713e-08		0.778346	1.38116	1.49368	1.36309	1.09046	1.43795	0.944325	0.990484	1.41332	1.31668	1.41657	1.34955	1.10744	0.91352	1.39377	1.14303	1.09635	1.28138	1.42442	1.20108	1.48569	3.16835	1.4987
	6.56764e-08	1.72859e-05	6.58254e-08	5.23593e-08	4.22357e-07	1.16368e-05	2.4728e-05	2.99286e-07	3.69551e-07	1.00275e-07	1.32201e-07	3.94277e-07	1.43455e-07	1.3164e-07	8.51862e-08	1.05061e-07	1.11894e-06	6.74177e-07	1.3659e-07	1.18972e-07	1.58701e-05	6.36509e-06	9.91818e-08	1.06269e-07	1.43597e-07		0.872884	0.965178	1.18411	0.932583	0.946289	1.09693	1.3289	1.24255	1.2638	1.01882	1.07338	1.35617	1.45888	1.19834	1.41705	2.20705	1.13392	1.47867	1.11187	1.09216	1.51736	1.12665	1.88676
	9.65642e-08	2.29086e-05	5.87264e-08	5.1667e-08	4.98143e-07	1.26373e-05	2.68871e-05	3.95537e-07	3.3516e-07	1.20506e-07	1.72417e-07	3.88771e-07	1.4389e-07	1.08254e-07	8.52854e-08	8.34712e-08	9.18842e-07	6.17742e-07	9.49217e-08	8.96312e-08	1.48347e-05	8.61181e-06	1.50098e-07	1.14874e-07	7.95026e-08		1.2834	1.27913	1.05641	0.920253	1.11609	1.19124	1.44492	1.64216	1.14619	1.22437	1.3999	1.33723	1.46331	0.985446	1.4187	1.7535	0.93114	1.35489	0.772682	0.82281	1.41835	1.52433	2.85537
	6.05301e-08	2.21865e-05	4.70435e-08	7.18956e-08	4.20499e-07	1.16769e-05	3.04955e-05	2.74194e-07	3.16739e-07	1.21509e-07	1.09364e-07	3.74001e-07	1.61424e-07	1.29619e-07	8.39009e-08	9.64287e-08	1.01372e-06	5.60859e-07	1.60491e-07	1.36736e-07	1.74039e-05	1.16417e-05	5.75955e-08	1.22955e-07	7.70327e-08		0.804485	1.23881	0.846247	1.28055	0.942127	1.10071	1.63884	1.13838	1.08319	1.23455	0.887961	1.28642	1.64162	1.17994	1.39567	2.0257	1.02729	1.23013	1.30643	1.25523	1.664	2.06065	1.09566
	1.08146e-07	1.82726e-05	9.42091e-08	5.32773e-08	4.83808e-07	1.634e-05	3.43313e-05	2.69845e-07	3.99916e-07	9.92886e-08	1.6616e-07	4.22826e-07	1.23478e-07	1.07955e-07	4.75511e-08	9.00445e-08	1.06204e-06	6.04715e-07	1.6805e-07	1.27427e-07	1.28407e-05	7.98871e-06	1.10789e-07	7.95528e-08	1.06242e-07		1.43733	1.02027	1.69469	0.948934	1.08397	1.54027	1.84498	1.12033	1.36764	1.00879	1.3491	1.45437	1.25573	0.982728	0.791	1.89159	1.07625	1.32632	1.36796	1.16978	1.22771	1.41404	2.10758
	5.02631e-08	2.5092e-05	8.39323e-08	6.02051e-08	4.74136e-07	1.18802e-05	2.85233e-05	2.35337e-07	3.65167e-07	1.7217e-07	1.82939e-07	3.78899e-07	1.28527e-07	9.87857e-08	4.89285e-08	4.83451e-08	1.16121e-06	6.69973e-07	1.47451e-07	1.55286e-07	1.5522e-05	1.34323e-05	6.29285e-08	1.18303e-07	7.07319e-08		0.668031	1.40104	1.50983	1.07233	1.0623	1.11987	1.53286	0.977057	1.2488	1.74928	1.48534	1.30327	1.30707	0.899257	0.813914	1.0156	1.17675	1.46945	1.20028	1.42551	1.48407	2.37758	1.19711
	9.29958e-08	1.99824e-05	5.08069e-08	6.95218e-08	4.96773e-07	1.23346e-05	2.45357e-05	2.7018e-07	3.71001e-07	1.01802e-07	1.39749e-07	3.09421e-07	1.05122e-07	1.43415e-07	8.20532e-08	7.39324e-08	9.98316e-07	5.36416e-07	1.84407e-07	1.12517e-07	2.02294e-05	8.20262e-06	7.01155e-08	1.783e-07	1.25077e-07		1.23598	1.11574	0.913946	1.23827	1.11302	1.16271	1.31856	1.12171	1.26876	1.03432	1.13466	1.06429	1.06905	1.30553	1.36493	1.55312	1.01168	1.17652	1.50111	1.0329	1.93415	1.4519	1.33383
	8.02463e-08	2.32509e-05	6.82423e-08	7.94616e-08	4.96055e-07	1.05209e-05	2.19464e-05	3.40782e-07	3.38759e-07	9.66015e-08	1.62796e-07	3.8255e-07	1.25709e-07	9.50013e-08	1.13176e-07	6.21585e-08	1.11476e-06	6.43954e-07	1.58627e-07	1.41995e-07	1.15034e-05	1.48498e-05	3.6187e-08	1.39644e-07	8.20751e-08		1.06653	1.29824	1.22759	1.41531	1.11141	0.99174	1.17941	1.41484	1.1585	0.98149	1.32179	1.31583	1.27841	0.864807	1.88265	1.30578	1.12968	1.41238	1.29125	1.30351	1.09985	2.62849	0.688396
	5.69821e-08	2.56496e-05	8.87988e-08	9.21909e-08	4.65912e-07	1.28264e-05	3.49584e-05	2.52996e-07	3.63219e-07	1.36326e-07	1.73333e-07	3.13297e-07	1.24298e-07	1.20457e-07	1.02577e-07	7.50251e-08	1.10858e-06	6.34244e-07	1.79123e-07	9.8996e-08	1.2058e-05	1.48121e-05	8.8412e-08	1.24412e-07	6.67139e-08		0.757331	1.43217	1.59737	1.64203	1.04387	1.20907	1.87868	1.05037	1.24214	1.3851	1.40734	1.07763	1.26406	1.09653	1.70634	1.57607	1.12342	1.39108	1.4581	0.908778	1.15288	2.62181	1.68189
	5.39112e-08	2.09688e-05	9.0555e-08	6.23413e-08	4.62493e-07	1.40203e-05	2.27691e-05	2.80774e-07	3.34918e-07	1.12528e-07	1.90238e-07	3.90988e-07	1.48259e-07	1.05837e-07	7.29297e-08	6.35441e-08	9.63151e-07	6.53649e-07	1.15726e-07	1.49048e-07	1.53858e-05	1.45426e-05	1.28681e-07	1.26585e-07	7.87868e-08		0.716516	1.17081	1.62896	1.11037	1.03621	1.32161	1.22362	1.1657	1.14536	1.14331	1.54459	1.34486	1.50773	0.963444	1.21317	1.33489	0.976042	1.43365	0.942035	1.36825	1.47105	2.57411	2.44793
	1.18826e-07	1.49086e-05	6.76964e-08	9.71573e-08	5.21388e-07	1.29378e-05	2.13073e-05	2.85447e-07	3.36346e-07	1.50307e-07	1.17729e-07	3.30976e-07	1.57221e-07	1.10162e-07	9.26102e-08	5.6275e-08	1.10539e-06	6.30476e-07	1.57718e-07	1.46596e-07	1.19002e-05	4.13289e-06	9.51169e-08	1.74518e-07	8.61132e-08		1.57928	0.832436	1.21777	1.73049	1.16817	1.21957	1.14507	1.1851	1.15024	1.52714	0.955872	1.13844	1.59888	1.00281	1.54055	1.18218	1.12019	1.38282	1.28385	1.34574	1.13779	0.731542	1.80944
	4.06333e-08	1.86319e-05	1.03633e-07	5.0105e-08	5.28096e-07	1.12328e-05	2.37587e-05	3.24495e-07	3.70341e-07	1.26931e-07	1.87213e-07	4.31992e-07	1.37799e-07	1.51013e-07	1.06306e-07	5.86074e-08	1.11985e-06	6.2828e-07	1.79649e-07	1.70053e-07	7.89709e-06	1.22266e-05	9.97488e-08	7.52107e-08	9.09486e-08		0.540044	1.04033	1.86421	0.892431	1.1832	1.05884	1.2768	1.34722	1.2665	1.28964	1.52004	1.48589	1.40137	1.37469	1.76837	1.23118	1.13484	1.378	1.46238	1.56108	0.755047	2.16417	1.89755
	6.3033e-08	1.94611e-05	5.2728e-08	5.68166e-08	5.39694e-07	1.5315e-05	2.68906e-05	2.85512e-07	3.70802e-07	1.31696e-07	1.70166e-07	3.57541e-07	1.28712e-07	7.76317e-08	1.17578e-07	1.05425e-07	1.27315e-06	6.32604e-07	1.79877e-07	1.2375e-07	7.9528e-06	8.77349e-06	1.21266e-07	1.22872e-07	7.4381e-08		0.837751	1.08663	0.948503	1.01197	1.20918	1.44364	1.44512	1.18537	1.26808	1.33805	1.38163	1.22981	1.30895	0.706691	1.95589	2.21469	1.29019	1.38749	1.46423	1.13602	0.760374	1.55295	2.30687
	7.2113e-08	2.33041e-05	5.64099e-08	8.09744e-08	5.2293e-07	1.08886e-05	1.74378e-05	2.66557e-07	4.66763e-07	1.09125e-07	1.55327e-07	3.83747e-07	1.37155e-07	8.05811e-08	9.55574e-08	7.27555e-08	1.14453e-06	6.32892e-07	1.9243e-07	1.66529e-07	9.01497e-06	5.17013e-06	9.70916e-08	1.33874e-07	1.57431e-07		0.95843	1.30121	1.01474	1.44225	1.17162	1.0264	0.937119	1.10667	1.59625	1.10873	1.26114	1.31995	1.39482	0.733539	1.58957	1.52839	1.15985	1.38812	1.56642	1.52873	0.861929	0.915139	1.847
	6.02267e-08	1.44862e-05	4.56316e-08	6.85727e-08	5.36402e-07	1.38798e-05	1.82309e-05	2.55539e-07	3.41337e-07	1.29559e-07	1.19337e-07	3.47345e-07	1.21088e-07	1.25967e-07	9.12871e-08	1.02137e-07	1.3515e-06	6.59929e-07	1.23864e-07	1.63241e-07	1.61686e-05	6.52317e-06	9.61907e-08	1.74897e-07	1.16597e-07		0.800454	0.808853	0.82085	1.22136	1.20181	1.30836	0.979736	1.06093	1.16731	1.31634	0.968927	1.19474	1.23142	1.14669	1.51854	2.14562	1.36959	1.44742	1.00828	1.49854	1.54589	1.15463	1.82986
	8.73286e-08	2.00261e-05	8.01213e-08	8.68291e-08	4.77805e-07	1.59998e-05	2.96449e-05	3.1185e-07	3.29484e-07	1.04581e-07	1.24439e-07	3.49009e-07	1.5802e-07	1.28859e-07	9.84305e-08	1.04376e-07	1.20781e-06	6.78267e-07	1.06365e-07	1.53545e-07	9.87595e-06	7.25461e-06	7.73489e-08	1.19238e-07	8.6495e-08		1.16066	1.11818	1.44127	1.54653	1.07052	1.5082	1.59313	1.29472	1.12678	1.06256	1.01035	1.20046	1.60701	1.17302	1.63737	2.19265	1.22397	1.48764	0.865834	1.40954	0.944247	1.2841	1.47143
	1.02357e-07	2.13563e-05	8.53931e-08	8.21075e-08	5.35383e-07	1.35972e-05	3.41637e-05	2.71089e-07	4.53054e-07	9.40067e-08	1.59523e-07	4.11159e-07	1.51997e-07	8.60216e-08	1.00545e-07	5.67084e-08	1.21856e-06	6.16388e-07	1.56837e-07	1.41456e-07	8.25167e-06	4.93376e-06	5.25588e-08	1.18128e-07	1.41855e-07		1.36039	1.19245	1.5361	1.46244	1.19952	1.28172	1.83598	1.12549	1.54936	0.955126	1.29521	1.41424	1.54575	0.783064	1.67254	1.19129	1.23486	1.35192	1.27668	1.29855	0.78895	0.873299	0.999842
	4.38243e-08	2.04912e-05	9.66193e-08	5.06161e-08	5.04653e-07	1.29763e-05	2.95896e-05	2.63486e-07	4.04441e-07	1.68177e-07	1.54711e-07	3.85169e-07	1.19507e-07	1.10769e-07	1.06803e-07	8.41743e-08	1.38356e-06	6.43531e-07	1.52343e-07	1.42799e-07	6.62595e-06	4.95005e-06	7.52516e-08	1.25998e-07	1.28428e-07		0.582455	1.14415	1.73805	0.901535	1.13067	1.22319	1.59016	1.09392	1.38312	1.70871	1.25614	1.32484	1.21534	1.00834	1.77664	1.76827	1.40208	1.41145	1.2401	1.31089	0.633512	0.876184	1.43153
	8.81068e-08	1.79128e-05	5.10644e-08	9.60415e-08	5.50074e-07	1.61619e-05	3.20605e-05	2.90686e-07	3.69357e-07	1.08411e-07	1.52064e-07	4.13376e-07	1.61162e-07	9.32245e-08	8.85263e-08	6.50641e-08	1.36659e-06	5.8033e-07	1.89348e-07	1.27627e-07	1.28968e-05	7.25844e-06	7.50533e-08	1.18371e-07	1.4079e-07		1.171	1.00018	0.918578	1.71062	1.23244	1.52348	1.72295	1.20685	1.26313	1.10147	1.23465	1.42186	1.63896	0.848633	1.47261	1.36682	1.38488	1.27284	1.54133	1.17161	1.23307	1.28478	1.42776
	5.18244e-08	1.7761e-05	8.82834e-08	7.04549e-08	4.88819e-07	1.34527e-05	2.54442e-05	2.79873e-07	3.76079e-07	1.36169e-07	1.53574e-07	3.75985e-07	1.13961e-07	9.09017e-08	8.40482e-08	9.29736e-08	1.36e-06	6.81835e-07	1.54339e-07	1.53085e-07	2.07464e-05	1.35683e-05	6.20416e-08	8.63596e-08	7.81483e-08		0.688781	0.991703	1.5881	1.25489	1.0952	1.2681	1.36739	1.16196	1.28612	1.3835	1.24691	1.29325	1.15894	0.827489	1.39812	1.95312	1.3782	1.49547	1.25635	1.40532	1.98358	2.40165	1.18024
			6.46507e-08	9.82122e-08	5.49822e-07
																											0.992656	1.08933	1.44442	1.3752	1.14567	1.36094	1.62192	1.17659	1.3217	1.24227	1.20865	1.33093	1.4332	0.928109	1.59146	1.69443	1.3248	1.40386	1.23606	1.31918	1.11667	1.344	1.30216
[truncated: 6 more columns]
